# Supplementary material for: An Integrative Analysis of Chromatin Interactions, Gene Expression and Genomic Variants Identifies 30 Likely Regulatory Variants in Prostate Cancer
Source: Preprints.org preprint supplement (doi:10.20944/preprints202301.0343.v1), 2023-01-19
Supplement: Supplementary file 1 [file SupplementaryTable1.xlsx]

## Sheet: Supplemenatry Table 1a
	Supplemenatry Table 1a. List of GWAS SNPs for PC were used in this study.
	Chromosome	Position	RS ID
	1	154834183	rs1218582
	1	154853295	rs4845678
	1	154859038	rs4845398
	1	154859581	rs869506
	1	154862559	1:154862559
	1	154863195	rs4845680
	1	154865125	rs1580943
	1	154867370	rs11264282
	1	204449952	rs7519417
	1	204450467	rs938126
	1	204450482	rs938125
	1	204451086	rs10900590
	1	204451495	rs4951382
	1	204452514	rs4951384
	1	204452615	rs10664961
	1	204453693	rs10793763
	1	204453784	rs11240749
	1	204454165	rs4951385
	1	204454547	rs4951386
	1	204456282	rs4951387
	1	204456983	rs2926536
	1	204457336	rs7556371
	1	204458328	rs1398148
	1	204460681	rs10900592
	1	204461622	rs6594015
	1	204464150	rs3014606
	1	204464181	rs2926534
	1	204465484	rs12404974
	1	204465659	rs16853865
	1	204470129	rs10900594
	1	204477977	rs11240754
	1	204478649	rs11240755
	1	204480742	rs2926533
	1	204482262	rs4951077
	1	204482594	rs11240756
	1	204484557	rs4951391
	1	204484617	rs4951392
	1	204486205	rs4245736
	1	204491551	rs35946963
	1	204491802	rs4951078
	1	204493844	rs7556655
	1	204496829	rs4252684
	1	204497335	rs4252687
	1	204497413	rs2045623
	1	204497913	rs2169137
	1	204504527	rs4951394
	1	204506107	rs4245738
	1	204511602	rs10900595
	1	204513256	rs4252725
	1	204516025	rs2290854
	1	204516947	rs4252734
	1	204518842	rs4245739
	1	204519693	rs11285873
	1	204522018	rs56200417
	1	204522457	rs10900596
	1	204527060	rs1046874
	1	204527379	rs1460036
	1	204528344	rs16853958
	1	204530505	rs12740680
	1	204535789	rs6681905
	1	204536197	rs6679336
	1	204537648	rs4951401
	1	204539241	rs4951403
	1	204539462	rs6594016
	1	204541197	rs930947
	1	204541342	rs4951404
	1	204542521	rs7541589
	1	204544001	rs885012
	1	204546947	rs2125855
	1	204547268	rs11240760
	1	204550366	rs5010868
	1	204556995	rs55664108
	1	204572050	rs10900601
	2	10117868	rs11902236
	2	173295405	rs12053442
	2	173296252	rs76264695
	2	173299266	rs75979419
	2	173300939	rs75689576
	2	173301275	rs59454075
	2	173302006	rs79160711
	2	173303031	rs28485589
	2	173303047	rs57878744
	2	173303065	rs56892098
	2	173303251	rs74483274
	2	173303310	rs80010354
	2	173303391	rs76837457
	2	173303486	rs141195656
	2	173303531	rs78181761
	2	173303800	rs79416408
	2	173304302	rs13414928
	2	173305382	rs4405725
	2	173305847	rs3762618
	2	173307726	rs10207640
	2	173307756	rs10207654
	2	173308194	rs16860397
	2	173308615	rs10187564
	2	173309330	rs148644163
	2	173309402	rs80353656
	2	173309618	rs13410475
	2	173309803	rs146618443
	2	173311553	rs12621278
	2	173311682	rs12615596
	2	173313453	rs1574259
	2	173313965	rs1574256
	2	173314670	rs12052250
	2	173314713	rs12052253
	2	173316217	rs12052385
	2	173317826	rs16860419
	2	173318179	rs115112210
	2	173318244	rs114161133
	2	173319112	rs16860426
	2	173319930	rs77167534
	2	173321413	rs16860438
	2	173321791	rs116532339
	2	173324256	rs75888567
	2	173324908	rs12622724
	2	173325244	rs12613307
	2	173327823	rs74461567
	2	173331076	rs116108611
	2	173334716	rs16860478
	2	173340209	rs55867175
	2	173342367	rs16860513
	2	173342416	rs16860515
	2	173344128	rs9636257
	2	173344680	rs2293647
	2	173352157	rs2293648
	2	173352824	rs10930559
	2	173353000	rs138348628
	2	173362046	rs79474289
	2	173366960	rs2293645
	2	173368358	rs16860634
	2	173370689	rs139972066
	2	173371278	rs16860643
	2	173373831	rs114997784
	2	173374424	rs78534109
	2	173375391	rs60096331
	2	173376319	rs59476799
	2	173377277	rs57404607
	2	173377302	rs59374567
	2	173378344	rs59970483
	2	173379230	rs78623829
	2	173382777	rs115142421
	2	173382986	rs76738244
	2	173390455	rs57121294
	2	173392942	rs183141927
	2	173393605	rs116907782
	2	173393903	rs147233048
	2	173394201	rs142731545
	2	173395373	rs75669437
	2	173397690	rs12615584
	2	173399767	rs57587465
	2	173400159	rs145463827
	2	173401123	rs6741759
	2	173401264	rs79481012
	2	173401348	rs56882727
	2	173401666	rs6730284
	2	173402460	2:173402460
	2	173402847	2:173402847
	2	173402863	2:173402863
	2	173403101	rs181480655
	2	173403181	rs185475817
	2	173403330	rs188148040
	2	173405330	rs6743174
	2	173406018	rs147340898
	2	173409320	rs138822454
	2	173410168	rs74355465
	2	173411004	rs115160117
	2	173415706	rs78647569
	2	238357118	rs60278044
	2	238359891	rs6758246
	2	238360708	rs6431539
	2	238360966	rs6431540
	2	238361089	rs7584314
	2	238361241	rs13397017
	2	238361650	rs11886117
	2	238363432	rs60222762
	2	238364342	rs7568588
	2	238364492	rs7595979
	2	238365159	rs60187585
	2	238365212	rs72248967
	2	238365230	rs61212490
	2	238365528	rs12469894
	2	238365637	rs12465714
	2	238366317	rs77922291
	2	238367130	rs937392
	2	238367420	rs1390985
	2	238368730	rs9287620
	2	238368751	rs10445707
	2	238368925	rs6709497
	2	238369184	rs1497129
	2	238369211	rs1497128
	2	238369282	rs1497127
	2	238370509	rs6758047
	2	238370610	rs6750895
	2	238370658	rs6751019
	2	238372255	rs192687018
	2	238372896	rs7607231
	2	238374824	rs13398506
	2	238374957	rs4402703
	2	238375494	rs13386174
	2	238376190	rs6431541
	2	238377012	rs12474519
	2	238378476	rs7582828
	2	238378749	rs937395
	2	238380266	rs9973650
	2	238381083	rs72620824
	2	238381243	rs72620825
	2	238381729	rs7604315
	2	238382899	rs13408361
	2	238383028	rs7571898
	2	238383073	rs7569197
	2	238384046	rs6722471
	2	238385126	rs6729659
	2	238386286	rs2325839
	2	238387228	rs7584330
	2	238388631	rs13432426
	2	238388792	rs13390494
	2	238389855	rs58643200
	2	238390745	rs7581882
	2	238392143	rs10660831
	2	238393136	rs13386290
	2	238393434	rs6737914
	2	238394913	rs7606177
	2	238395394	rs66509917
	2	238395429	rs67071074
	2	238395479	rs58057291
	2	238396872	rs880930
	2	238396963	rs880932
	2	238396985	rs72620830
	2	238398165	rs6760842
	2	238398182	rs6713555
	2	238400036	rs6757376
	2	238401784	rs12465081
	2	242180757	rs56216206
	2	242185311	rs56241013
	2	242191140	rs62186369
	2	242200406	rs4675970
	2	242205955	rs56156035
	2	242206555	rs7557535
	2	242207423	rs79379092
	2	242211554	rs62186378
	2	242212033	rs181225616
	2	242212155	rs186385628
	2	242214897	rs149863403
	2	242217627	rs4675969
	2	242219281	rs56383420
	2	242220718	rs7579620
	2	242221219	rs62186396
	2	242221570	rs73018141
	2	242226700	rs62186400
	2	242227112	rs55918461
	2	242227157	rs56363214
	2	242228780	rs6752050
	2	242229957	rs62186404
	2	242232189	rs148341026
	2	242235193	rs57196672
	2	242236667	rs62186411
	2	242242439	rs56129392
	2	242243251	rs56052835
	2	242245570	rs6757876
	2	242249499	rs62186422
	2	242252792	rs62186431
	2	242257835	rs62186433
	2	242259207	rs6717633
	2	242260340	rs60209440
	2	242260756	rs59496049
	2	242261240	rs73020143
	2	242263223	rs4346380
	2	242268264	rs80016451
	2	242268994	rs55634485
	2	242269024	rs55645375
	2	242269303	rs62193165
	2	242271569	rs148007102
	2	242272388	rs59536819
	2	242273442	rs60119858
	2	242275579	rs41266959
	2	242276509	rs371514003
	2	242276523	rs62193171
	2	242277833	rs73002111
	2	242278018	rs141283512
	2	242278791	rs201090856
	2	242281438	rs12151655
	2	242282957	rs12619369
	2	242284405	rs62193175
	2	242284824	rs1984598
	2	242289051	rs2051963
	2	242292307	rs1056801
	2	242294301	rs62193197
	2	242298228	rs16843590
	2	242300076	rs62193199
	2	242301982	rs111309489
	2	242302934	rs73002147
	2	242303717	rs62193202
	2	242311508	rs3834168
	2	242315443	rs62193204
	2	242316512	rs62193205
	2	242316843	rs62193206
	2	242318501	rs62193207
	2	242322430	rs62193208
	2	242323523	rs62193209
	2	242323616	rs62193210
	2	242324760	rs4675964
	2	242324763	rs4675963
	2	242327076	rs62193211
	2	242336614	rs62193213
	2	242339656	rs28433352
	2	242345784	rs142541198
	2	242346057	rs55751610
	2	242348615	rs147434105
	2	242352257	rs60604866
	2	242352582	rs3815262
	2	242354632	rs62193221
	2	242355701	rs3771564
	2	242356239	rs73004354
	2	242361298	rs62193255
	2	242362168	rs62193256
	2	242364119	rs56222556
	2	242366262	rs59715783
	2	242371825	rs17386555
	2	242372925	rs35684878
	2	242375008	rs62190365
	2	242376276	rs62190367
	2	242378138	rs62190368
	2	242379751	rs17386695
	2	242382192	rs73004382
	2	242382864	rs3771570
	2	242384194	rs62190370
	2	242388685	rs62190373
	2	242399863	rs2010169
	2	242400723	rs3771585
	2	242400750	rs3836159
	2	242402062	rs4675811
	2	242405772	rs62190407
	2	242406245	rs55811034
	2	242406654	rs73006381
	2	242407467	rs55764424
	2	242408507	rs71840951
	2	242409701	rs3771587
	2	242410621	rs62190410
	2	242412358	rs10190033
	2	242417950	rs62190413
	2	242421314	rs3821285
	2	242422404	rs146420876
	2	242422446	rs73008106
	2	242426692	rs62190415
	2	242430170	rs4675944
	2	242430245	rs13405290
	2	242431585	rs869943
	2	242432142	rs4075818
	2	242434316	rs35496488
	2	242434809	rs9052
	2	242439938	rs35256094
	2	242442575	rs62190456
	2	242443157	rs73008126
	2	43553949	rs1465618
	2	43555506	rs4340576
	2	62908877	rs62177748
	2	62953910	rs62177751
	2	62961179	rs62179277
	2	62991718	rs62179283
	2	63010349	rs62179314
	2	63027337	rs17432497
	2	63131731	rs721048
	2	63133144	rs57935133
	2	63134879	rs2710646
	2	63165942	rs139219285
	2	63238346	rs2553041
	2	85741126	rs35850123
	2	85741372	rs13411109
	2	85742297	rs2886722
	2	85754342	rs13394343
	2	85754450	rs6735152
	2	85754563	rs6721924
	2	85755357	rs6739015
	2	85755928	rs6547620
	2	85756375	rs6714709
	2	85757046	rs150810559
	2	85757371	rs6719046
	2	85757379	rs6733913
	2	85758015	rs6747828
	2	85758090	rs6750832
	2	85758144	rs6750847
	2	85758790	rs2044474
	2	85759127	rs17026396
	2	85759494	rs59877521
	2	85759590	rs70953953
	2	85760395	rs6731005
	2	85761279	rs6705839
	2	85761417	rs6705971
	2	85761654	rs10175792
	2	85762761	rs10179195
	2	85763274	rs6714157
	2	85763520	rs6743030
	2	85764006	rs3755014
	2	85764041	rs3755015
	2	85764960	rs1446668
	2	85769711	rs1078004
	2	85772548	rs7605975
	2	85773061	rs12473819
	2	85773656	rs10700825
	2	85774676	rs6547621
	2	85776490	rs5832649
	2	85783128	rs6738645
	2	85787341	rs12714145
	2	85788175	rs7568458
	2	85788270	rs10172544
	2	85788402	rs11350741
	2	85790316	rs35565292
	2	85792384	rs35215812
	2	85793760	rs71390080
	2	85794297	rs10187424
	2	85794415	rs10198569
	2	85796101	rs11891260
	2	85796962	rs5832650
	2	85802134	rs6547624
	2	85803542	rs6757263
	2	85805367	rs3770098
	2	85806068	rs3731827
	2	85808573	rs1972297
	2	85808737	rs1009
	2	85808871	rs1058588
	2	85808982	rs1010
	2	85809711	rs1562323
	2	85809955	rs2366639
	3	87127455	rs2575762
	3	87128172	rs2575763
	3	87128617	rs2007157
	3	87134412	rs2575766
	3	87136467	rs1036446
	3	87137303	rs2575769
	3	87138182	rs2660757
	3	87139842	rs1436644
	3	87147034	rs6791960
	3	87149428	rs71619534
	3	87151870	rs12636460
	3	87152169	rs9284813
	3	87152681	rs9310048
	3	87156130	rs7648282
	3	87156240	rs9817169
	3	87157092	rs12714675
	3	87165443	rs71306960
	3	87165799	rs1986448
	3	87166314	rs12631713
	3	113275624	rs7611694
	3	113277105	rs7639565
	3	113282326	rs6769767
	3	113284149	rs12629813
	3	113284162	rs12629879
	3	113284745	rs7613082
	3	113287035	rs55669843
	3	113288229	rs11921816
	3	113290450	rs13092681
	3	113290793	rs4682495
	3	113292637	rs28674622
	3	113294482	rs1567780
	3	113300183	rs2271494
	3	113304781	rs9827928
	3	113308412	rs12489267
	3	127808502	rs7355887
	3	127817508	rs7632756
	3	127819062	rs4857866
	3	127822320	rs7641133
	3	127836287	rs4857836
	3	127836319	rs4857837
	3	127837449	rs11305690
	3	127856573	rs6414310
	3	127865397	rs2999045
	3	127865510	rs2955102
	3	127867397	rs67451924
	3	127869471	rs145954436
	3	127869598	rs144609957
	3	127870060	rs2461794
	3	127878416	rs2999048
	3	127878817	rs2999049
	3	127881613	rs2955117
	3	127882064	rs2955118
	3	127888067	rs872267
	3	127888347	rs2955120
	3	127889268	rs6148064
	3	127889287	rs3122173
	3	127892037	rs2999052
	3	127895226	rs2687729
	3	127895986	rs1554535
	3	127898501	rs2811476
	3	127898943	rs34977128
	3	127901786	rs2811479
	3	127902091	rs2811480
	3	127904496	rs2811481
	3	127904943	rs2811482
	3	127905451	rs2811516
	3	127905518	rs2811515
	3	127907929	rs2811514
	3	127909564	rs2811513
	3	127911820	rs2811512
	3	127913263	rs883238
	3	127916551	rs2811509
	3	127918000	rs2492285
	3	127918955	rs2687720
	3	127919045	rs2687733
	3	127919046	rs2811485
	3	127920023	rs2811508
	3	127923187	rs6439119
	3	127930459	rs9838120
	3	127930866	rs7374072
	3	127931402	rs7372439
	3	127933203	rs11707297
	3	127933786	rs4857871
	3	127933822	rs4857872
	3	127934218	rs4857873
	3	127934269	rs4857874
	3	127934276	rs4857875
	3	127934329	rs6770140
	3	127934774	rs4384971
	3	127935461	rs6439121
	3	127936527	rs9879865
	3	127936532	rs9879866
	3	127937645	rs9847576
	3	127938137	rs9814834
	3	127939034	rs9857235
	3	127939357	rs4323023
	3	127940353	rs9845651
	3	127940440	rs7372902
	3	127940534	rs6439122
	3	127941439	rs6439123
	3	127942379	rs9873786
	3	127942730	rs35277207
	3	127942826	rs34906893
	3	127943328	rs4857838
	3	127944477	rs6775988
	3	127945349	rs6777054
	3	127946788	rs9830294
	3	127948060	rs4857877
	3	127948149	rs4857878
	3	127948959	rs34834087
	3	127958013	rs4074440
	3	127961396	rs9843281
	3	127963448	rs13434079
	3	127978795	rs4555544
	3	127994160	rs2811529
	3	128038373	rs10934853
	3	128046643	rs4857841
	3	128058617	rs3849531
	3	128075398	rs1735546
	3	128083332	rs1702122
	3	128092102	rs1735538
	3	128094493	rs1702119
	3	141093285	rs7624084
	3	141094209	rs6440003
	3	141094769	rs4683605
	3	141100280	rs6764769
	3	141101961	rs9853018
	3	141102833	rs6763931
	3	141105570	rs724016
	3	141106063	rs7632381
	3	141106954	rs13077048
	3	141109321	rs6808936
	3	141109348	rs6785012
	3	141110074	rs4683606
	3	141112871	rs34207738
	3	141115219	rs1582874
	3	141117970	rs34466132
	3	141118028	rs13068733
	3	141121814	rs2871960
	3	141125186	rs1344674
	3	141125705	rs1344672
	3	141133450	rs1991431
	3	141140366	rs6763927
	3	141140968	rs9846396
	3	141142691	rs6440006
	3	141147414	rs7650602
	3	141150026	rs7625643
	3	170121598	rs55953261
	3	170123144	rs56121376
	3	170123988	rs59412689
	3	170130102	rs10936632
	3	87110674	rs2660753
	3	87110766	rs2575750
	3	87118806	rs1436642
	3	87119543	rs1865866
	4	106061534	rs7679673
	4	106064626	4:106064626
	4	106065308	rs10007915
	4	106131210	rs2007403
	4	106137033	rs2047409
	4	106138146	rs11735256
	4	106142960	rs11097882
	4	106143797	rs13147502
	4	106151642	rs1391439
	4	74349158	rs1894292
	4	95475918	rs2452590
	4	95476719	rs2452591
	4	95481367	rs2452592
	4	95484001	rs2510767
	4	95547467	rs7679542
	4	95548550	rs10015716
	4	95554249	rs7674144
	4	95562877	rs17021918
	4	95570165	rs35964087
	4	95571976	rs2136486
	4	95573998	rs12511169
	4	95574708	rs11445839
	4	95575601	rs2280003
	4	95577290	rs13121500
	4	95577397	rs6837308
	4	95578217	rs12505788
	4	95579366	rs4699316
	4	95579739	rs12500116
	4	95580095	rs7694162
	4	95580631	rs10538762
	4	95580633	rs6532498
	4	95580635	4:95580635
	4	95581345	rs7659399
	4	95582026	rs61597100
	4	95582071	rs142383920
	4	95582213	rs6817664
	4	95582359	rs6822544
	4	95586279	rs10590
	4	95587675	rs1043848
	4	95589477	rs3762876
	4	95590158	rs17021972
	4	95591976	rs998071
	4	95595308	rs7681843
	5	1890877	rs12655062
	5	1891174	rs4975758
	5	1891800	rs10866527
	5	1891821	rs10866528
	5	1892455	rs4975759
	5	1892876	rs34695572
	5	1894420	rs79056980
	5	1895486	rs12656007
	5	1895829	rs12653946
	5	1896263	rs13177232
	5	1897179	rs13177600
	5	1897244	rs35375589
	5	1897338	rs35010507
	5	1897423	rs35326077
	5	1280028	rs2242652
	5	172930680	rs12518584
	5	172939426	rs6869841
	5	172939755	rs6891752
	5	172944400	rs10067247
	5	172945918	rs889017
	5	172948354	rs10038966
	5	172948513	rs12517520
	5	172954632	rs35834888
	5	44265790	rs10473349
	5	44267175	rs6883160
	5	44267744	rs6866891
	5	44272596	rs1374964
	5	44273673	rs2034347
	5	44273923	rs2034346
	5	44274058	rs3849694
	5	44279496	rs1542219
	5	44280204	5:44280204
	5	44280735	rs2053786
	5	44281803	rs28676336
	5	44283001	rs10941663
	5	44284854	rs4242111
	5	44286363	rs369388925
	5	44286562	rs4410644
	5	44290311	rs16873923
	5	44290574	rs10472392
	5	44291404	rs13156213
	5	44292138	rs11299518
	5	44294003	rs1374977
	5	44296986	rs1448044
	5	44297042	rs1374978
	5	44299400	rs10072476
	5	44299998	rs9292903
	5	44300025	rs10074405
	5	44300355	rs5867656
	5	44300361	rs5867657
	5	44303760	rs1374961
	5	44306632	rs17228228
	5	44311070	rs1374962
	5	44311768	rs1448035
	5	44313282	rs1839090
	5	44313303	rs1839091
	5	44315108	rs10473353
	5	44318532	rs980510
	5	44325322	rs4498258
	5	44325469	rs13159800
	5	44325507	rs4410645
	5	44325984	rs5867660
	5	44328270	rs4866891
	5	44328325	rs13185276
	5	44328731	rs10055386
	5	44328829	rs13165847
	5	44329203	rs13170645
	5	44330995	rs13180550
	5	44331751	rs12652957
	5	44331905	rs987642
	5	44333212	rs67412235
	5	44335338	rs983373
	5	44335820	rs1011814
	5	44337236	5:44337236
	5	44337365	rs10708505
	5	44337690	rs72763188
	5	44338759	rs10512844
	5	44339764	rs2330544
	5	44339810	rs2330545
	5	44339984	rs4866893
	5	44340200	rs4866894
	5	44340261	rs16873982
	5	44340975	rs16873983
	5	44341125	rs61032851
	5	44341336	rs10512845
	5	44341979	rs6451761
	5	44345540	rs10073166
	5	44346381	rs16874002
	5	44347131	rs7708529
	5	44347791	rs12657059
	5	44348652	rs12523512
	5	44348789	rs996935
	5	44348901	rs12516566
	5	44348987	rs12513830
	5	44349141	rs1448039
	5	44349791	rs5867662
	5	44350684	rs72763202
	5	44350727	rs1448038
	5	44352344	rs1448037
	5	44353621	rs10060548
	5	44353985	rs1374970
	5	44355363	rs1374967
	5	44356347	rs1550937
	5	44357221	rs11307970
	5	44358915	rs593307
	5	44359299	rs1351635
	5	44359428	rs1482689
	5	44360892	rs339509
	5	44362134	rs10941664
	5	44362538	rs1482671
	5	44362560	rs339505
	5	44362769	rs1482672
	5	44364007	rs339502
	5	44365545	rs2121875
	5	44366552	rs16874036
	5	44367221	rs6859730
	5	44368123	rs1482673
	5	44368506	rs1482675
	5	44369656	rs900379
	5	44371669	rs2170582
	5	44385415	rs1482679
	5	44392142	rs1482680
	6	117199790	rs630045
	6	117200434	rs339351
	6	117202475	rs339353
	6	117206395	rs339326
	6	117207682	rs339327
	6	117208509	rs339328
	6	117210052	rs339331
	6	117212258	rs610424
	6	117212689	rs339334
	6	117213614	rs434499
	6	117215114	rs339340
	6	117215671	rs339341
	6	117215820	6:117215820
	6	117217382	rs339343
	6	117217950	rs339344
	6	117219524	rs339347
	6	117220055	rs654971
	6	117221186	rs339350
	6	117221542	rs339297
	6	117222162	rs339299
	6	117222229	rs339300
	6	117222982	rs10706356
	6	117224303	rs339301
	6	117224641	rs339302
	6	117228290	rs34272842
	6	117229593	rs1358793
	6	117229806	rs12201912
	6	117229958	rs35974852
	6	117230339	rs2145173
	6	117230721	rs6568967
	6	117234012	rs34687050
	6	117234517	rs6927262
	6	117234711	rs9489065
	6	117235656	rs1321371
	6	117236853	rs1406982
	6	117237524	rs1321372
	6	117239141	rs6936629
	6	117239499	rs9489066
	6	117240593	rs1321366
	6	117242021	rs12202378
	6	109277908	rs12193858
	6	109278425	rs58161620
	6	109278873	rs12195728
	6	109279105	rs12195848
	6	109279381	rs11153139
	6	109280932	rs114481082
	6	109280933	rs115643887
	6	109281411	rs6651000
	6	109284223	rs12195372
	6	109284255	rs12195378
	6	109285189	rs2273669
	6	109287209	rs6941125
	6	109287459	rs11754955
	6	109288036	rs76094073
	6	109289203	rs12191613
	6	109289540	rs10872027
	6	109289881	rs6935782
	6	109290319	rs6568554
	6	109290608	rs138986180
	6	109291701	rs12193948
	6	109291782	rs12194006
	6	109291824	rs12213775
	6	109292058	rs67708237
	6	109292133	rs7753554
	6	109292736	rs1887414
	6	109292806	rs4992384
	6	109292816	rs4992383
	6	109292826	rs4992382
	6	109293898	rs6907937
	6	109293973	rs6908104
	6	109294164	rs6928200
	6	109294322	rs6929070
	6	109294336	rs6908714
	6	109294752	rs3734649
	6	109295017	rs3734650
	6	109295040	rs3734651
	6	109295293	rs2038542
	6	109296185	rs2145767
	6	109296261	rs2145766
	6	109296362	rs2145765
	6	109296586	rs141683383
	6	109296736	rs10457184
	6	109297516	rs143542638
	6	109297676	rs150426367
	6	109297857	rs114830980
	6	109298135	rs117941557
	6	109298413	rs140202025
	6	109298654	rs144882514
	6	109299089	rs10456862
	6	109299092	rs10456863
	6	109299507	rs10456864
	6	109300554	rs151054058
	6	109300564	rs142444060
	6	109300577	rs12207202
	6	109300607	rs12200902
	6	109300661	rs11153143
	6	109300709	rs11153144
	6	109300799	rs11153145
	6	109300826	rs11153146
	6	109301091	rs11757168
	6	109301664	rs111523655
	6	109302173	rs12196010
	6	109302258	rs12196024
	6	109302372	rs12196143
	6	109302861	6:109302861
	6	109302894	rs116189763
	6	109303726	rs111303770
	6	109303967	rs12206834
	6	109304058	rs11153147
	6	109304084	rs11153148
	6	109304272	rs11153149
	6	109304694	rs1080945
	6	109305299	rs78276890
	6	109305318	rs112319185
	6	109305456	rs76747161
	6	109305743	rs12210444
	6	109306480	rs111773102
	6	109306489	rs114414265
	6	109306493	rs111353760
	6	109306495	rs375937982
	6	109306681	rs12212402
	6	109306963	rs2145763
	6	109307284	rs5879006
	6	109307710	rs16822
	6	109308952	rs4509156
	6	109309150	rs4527738
	6	109309287	rs4470881
	6	109310268	rs113477421
	6	109310596	rs2798646
	6	109310627	rs113692625
	6	109310649	rs7759680
	6	109310719	rs2798647
	6	109310762	6:109310762
	6	109311560	rs6904998
	6	109312239	rs78550764
	6	109312279	6:109312279
	6	109312282	rs112482131
	6	109312498	rs78383792
	6	109312689	rs74582170
	6	109313303	rs12154092
	6	109313629	rs12215614
	6	109313728	rs10872028
	6	109314350	rs11970599
	6	109315115	rs12153822
	6	109316652	rs11153150
	6	109316754	rs11153151
	6	109317042	rs111802830
	6	109317330	rs12214567
	6	109317388	rs12201102
	6	109317394	rs6918331
	6	109317635	rs12216104
	6	109318279	rs79285264
	6	109318280	rs76732622
	6	109318337	rs111413983
	6	109318516	rs6651002
	6	109318704	rs12198182
	6	109318843	rs12204576
	6	109320441	rs12200531
	6	109321497	rs77002235
	6	109322477	rs10457185
	6	109322554	rs12214121
	6	109323222	rs3839562
	6	109323519	rs2273668
	6	109324353	rs75675305
	6	109325624	rs75995854
	6	109325962	rs113614274
	6	109326183	rs76267985
	6	109326621	rs7761290
	6	109328432	rs1407241
	6	109328988	rs72213032
	6	109329473	rs12200578
	6	109329641	rs12215344
	6	109329654	rs151285329
	6	109330367	rs12215736
	6	109330417	rs28504359
	6	109330859	rs6908184
	6	109331777	rs6568555
	6	109334162	rs113306703
	6	109334301	rs72131680
	6	109334458	rs11751295
	6	109334971	rs7767882
	6	109335969	rs11752532
	6	109336051	rs10457187
	6	109336617	rs117412830
	6	109338110	rs12205053
	6	109338147	rs12197912
	6	109338161	rs12205061
	6	109338433	rs12198088
	6	109339773	rs34135428
	6	109340291	rs12201821
	6	109341298	rs75671532
	6	109341834	rs7738483
	6	109341844	rs141674146
	6	109342169	rs11755471
	6	109342693	rs80099385
	6	109343252	rs68160205
	6	109343340	rs11153152
	6	109343648	rs7769313
	6	109344975	rs76201299
	6	109345044	rs141852184
	6	109345930	rs12374658
	6	109346184	rs12374597
	6	109347057	rs7765732
	6	109347262	rs7766248
	6	109347731	rs113393759
	6	109347980	rs113948720
	6	109349356	rs35853071
	6	109350128	rs76430494
	6	109350290	rs79465564
	6	109350351	rs78714994
	6	109350489	rs75263286
	6	109350550	rs17070136
	6	109350616	rs77936298
	6	109351125	rs7759014
	6	109352545	rs75942063
	6	109353216	rs12206423
	6	109353407	rs12206634
	6	109353413	rs12213664
	6	109353429	rs12193075
	6	109353519	rs12206606
	6	109355790	rs1424479
	6	109356104	rs11153153
	6	109356589	rs76367548
	6	109357324	rs11153154
	6	109357701	rs12195836
	6	109357829	rs12202145
	6	109358345	rs17070139
	6	109359121	rs112276698
	6	109359688	rs36076724
	6	109359963	rs11153155
	6	109361534	rs34921936
	6	109362245	rs112871784
	6	109362749	rs6899723
	6	109363217	rs12215381
	6	109364698	rs9688896
	6	109364825	rs9688496
	6	109365911	rs11153156
	6	109366087	rs11752581
	6	109366495	rs112942730
	6	109366740	rs76249006
	6	109367169	rs2003315
	6	109367255	rs2356575
	6	109369246	rs12213274
	6	109369745	rs12208578
	6	109370003	rs11757590
	6	109370006	rs11759732
	6	109371129	rs6916819
	6	109372120	rs6900472
	6	109372532	rs138225942
	6	109375972	rs34504736
	6	109388086	rs11281315
	6	109389508	rs1364450
	6	153413309	rs7740777
	6	153414273	rs9371280
	6	153414287	rs9397586
	6	153415368	rs6557261
	6	153415651	rs9479505
	6	153416133	rs7756810
	6	153416912	rs9397587
	6	153421545	rs11155895
	6	153424055	rs7750498
	6	153425244	rs1971152
	6	153426679	rs3870364
	6	153426932	rs3870365
	6	153427517	rs9479510
	6	153427706	rs4083914
	6	153428068	rs28642896
	6	153428102	rs9383649
	6	153428297	rs9383650
	6	153428611	rs7742238
	6	153428685	rs11417971
	6	153428982	rs7747003
	6	153429447	rs17083581
	6	153430305	6:153430305
	6	153430451	rs6931160
	6	153430794	rs35445951
	6	153430867	rs9384077
	6	153430868	rs63739861
	6	153431125	rs12055786
	6	153432259	rs4267963
	6	153432566	rs3968480
	6	153432697	rs4631302
	6	153432985	rs7743683
	6	153433208	rs7745216
	6	153433402	rs6557265
	6	153433534	rs6557266
	6	153433542	rs6907823
	6	153433701	rs6557267
	6	153433726	rs6557268
	6	153433763	rs6557269
	6	153433764	rs6557270
	6	153433932	rs4470859
	6	153434070	rs4481443
	6	153435639	rs4634469
	6	153438114	rs6557272
	6	153439767	rs3870366
	6	153439999	rs6939447
	6	153440062	rs6901126
	6	153440197	rs6917538
	6	153440515	rs9384082
	6	153440711	rs7740380
	6	153440770	rs7758002
	6	153441079	rs1933488
	6	153441733	rs1442744
	6	153441831	rs6927516
	6	153441989	rs3083482
	6	153442789	rs9479517
	6	153447550	rs13215402
	6	153448252	rs6934121
	6	153449670	rs2119992
	6	160581374	rs651164
	6	31107733	rs1966
	6	31108607	rs1265089
	6	31110671	rs1265085
	6	31113214	rs1265074
	6	31115711	rs1265068
	6	31118511	rs130067
	6	32192331	rs3096702
	6	32195251	rs9267853
	6	32196575	rs9267858
	7	20994491	rs12155172
	7	20996953	rs10713532
	7	20999211	rs9655205
	7	97676259	rs10953238
	7	97682908	rs34249863
	7	97684131	rs989481
	7	97687986	rs847560
	7	97688440	rs4727386
	7	97690438	rs2394817
	7	97694493	rs13240869
	7	97695363	rs705308
	7	97695888	rs35101190
	7	97696334	rs12674083
	7	97697513	rs34675530
	7	97698000	rs372278614
	7	97701575	rs34796934
	7	97704822	rs6465647
	7	97708397	rs12670686
	7	97709345	rs1013887
	7	97709861	rs1013886
	7	97711340	rs6946915
	7	97711783	rs6951277
	7	97712537	rs75621600
	7	97712665	rs76802117
	7	97712831	rs7790120
	7	97713039	rs7790736
	7	97713101	rs7790479
	7	97713514	rs12704963
	7	97714458	rs6465648
	7	97714474	rs6465649
	7	97715088	rs6967926
	7	97715319	rs10464490
	7	97716483	rs940432
	7	97716495	rs940431
	7	97716540	rs940430
	7	97718201	rs55784506
	7	97718378	rs35641135
	7	97719699	rs13221897
	7	97719806	rs13221758
	7	97721425	rs7808528
	7	97724503	rs6465650
	7	97728449	rs34307903
	7	97728918	rs201515619
	7	97732842	rs6969384
	7	97754097	rs141020575
	7	97773812	rs11768309
	7	97774859	rs6977321
	7	97778576	rs11767962
	7	97784061	rs17435590
	7	97785500	rs34320230
	7	97786282	rs6465654
	7	97789351	rs6958572
	7	97790991	rs12666406
	7	97792820	rs17435847
	7	97796635	rs7804318
	7	97807882	rs6965016
	7	97816327	rs6465657
	7	97816638	rs6465658
	7	97817321	rs11763970
	7	97819047	rs7791463
	7	97822115	rs11765552
	7	97822210	rs3801294
	7	97825188	rs11764933
	7	97826340	rs2132276
	7	97840146	rs34616135
	8	128103937	rs1456315
	8	128103969	rs72725879
	8	128104055	rs7463708
	8	23483957	rs6998881
	8	23487874	rs7005012
	8	23490172	rs4871896
	8	23491191	rs11135762
	8	23494194	rs73216756
	8	23495136	rs7835802
	8	23495295	rs148241398
	8	23496546	rs6557705
	8	23498855	rs1949164
	8	23498935	rs1949163
	8	23499264	rs7829619
	8	23499683	rs7830220
	8	23500854	rs4872170
	8	23501606	rs1398240
	8	23501692	rs73216762
	8	23501730	rs1398239
	8	23502028	rs34703123
	8	23502588	rs13256300
	8	23502660	rs13256366
	8	23502965	rs71504412
	8	23504658	rs146486133
	8	23504784	rs201177980
	8	23504834	rs202107500
	8	23506972	rs199905199
	8	23507262	rs142463603
	8	23507360	rs189897331
	8	23508269	rs374469097
	8	23508308	rs186208303
	8	23508979	rs370802054
	8	23509858	rs17296662
	8	23510120	rs3060153
	8	23511163	rs11773905
	8	23512136	rs7831442
	8	23513730	rs4242402
	8	23514185	rs4242403
	8	23514289	rs4872171
	8	23514343	rs4872172
	8	23515527	rs2315144
	8	23515679	rs13262683
	8	23516500	rs1512271
	8	23517031	rs1398238
	8	23518058	rs7006278
	8	23518785	rs13274763
	8	23519135	rs56014938
	8	23520043	rs1512270
	8	23522452	rs7821330
	8	23522741	rs995433
	8	23522745	rs11135765
	8	23522851	rs995432
	8	23524252	rs149897783
	8	23524744	rs1606303
	8	23525075	rs56193509
	8	23525211	rs4872174
	8	23525358	rs11782388
	8	23525543	rs13265330
	8	23526463	rs1512268
	8	23528511	rs13272392
	8	23528659	rs1971376
	8	23529521	rs1160267
	8	23531987	rs13267884
	8	23532496	rs56229168
	8	23533623	rs11135766
	8	23533634	rs59389126
	8	23534018	rs10503733
	8	23534802	rs4872175
	8	23535219	rs13262167
	8	23538008	rs4872176
	8	23538224	rs67789324
	8	23538426	rs4872177
	8	23538533	rs1567669
	8	23539871	rs77096235
	8	23540417	rs11781886
	8	23541375	rs73216784
	8	23542893	rs13253010
	8	23543429	rs1866342
	8	23543583	rs1866343
	8	23545436	rs11786738
	8	23545458	rs11786742
	8	23545543	rs13248160
	8	23545856	rs10866832
	8	128472642	rs1447292
	8	128483914	rs4871801
	8	128484181	rs6470518
	8	128484223	rs6470519
	8	128484333	rs6470520
	8	128484399	rs7818556
	8	128485038	rs1447295
	8	128485640	rs4871802
	8	128485964	rs10109700
	8	128489199	rs7826179
	8	128494481	rs9643226
	8	128495359	rs1447296
	8	128496412	rs11995378
	8	128498504	rs4431561
	8	128499911	rs4871024
	8	128501150	rs10808558
	8	128515775	rs11393128
	8	128516952	rs7832031
	8	128517573	rs4242382
	8	128518015	rs4314621
	8	128518554	rs4242384
	8	128519171	rs9297759
	8	128520173	rs7812429
	8	128520479	rs7812894
	8	128522202	rs7814837
	8	128524414	rs7824868
	8	128528435	rs4582524
	8	128528533	rs4641026
	8	128529033	rs4498506
	8	128529116	rs4297007
	8	128529229	rs4242385
	8	128530616	rs13255059
	8	128531689	rs11986220
	8	128531873	rs11988857
	8	128532137	rs10090154
	8	128532399	rs4515512
	8	128533442	rs7824776
	8	128533473	rs7843031
	8	128534755	rs12545648
	8	128535635	rs7005132
	8	128538824	rs8180905
	8	128539360	rs7837688
	8	128544812	rs6470529
	8	128545002	rs11300434
	8	128547942	rs4871813
	8	23495136	rs7835802
	8	23498855	rs1949164
	8	23498935	rs1949163
	8	23499264	rs7829619
	8	23499683	rs7830220
	8	23501606	rs1398240
	8	23501730	rs1398239
	8	23502028	rs34703123
	8	23502588	rs13256300
	8	23502660	rs13256366
	8	23502965	rs71504412
	8	23504658	rs146486133
	8	23504784	rs201177980
	8	23504834	rs202107500
	8	23506972	rs199905199
	8	23507262	rs142463603
	8	23507360	rs189897331
	8	23514185	rs4242403
	8	23514289	rs4872171
	8	23514343	rs4872172
	8	23515527	rs2315144
	8	23515679	rs13262683
	8	23516500	rs1512271
	8	23517031	rs1398238
	8	23522452	rs7821330
	8	23522741	rs995433
	8	23522745	rs11135765
	8	23522851	rs995432
	8	23524252	rs149897783
	8	23524744	rs1606303
	8	23525358	rs11782388
	8	23525543	rs13265330
	8	23526463	rs1512268
	8	23528511	rs13272392
	8	23529521	rs1160267
	8	23531987	rs13267884
	8	23533623	rs11135766
	8	23534802	rs4872175
	8	23535219	rs13262167
	8	23538008	rs4872176
	8	23538224	rs67789324
	8	23539871	rs77096235
	8	25892142	rs11135910
	8	25894205	rs141811748
	8	25910156	rs6984769
	9	110153673	rs817831
	9	110156300	rs817826
	10	51489224	rs35716372
	10	51489592	rs143567661
	10	51489780	rs28451380
	10	51491125	rs4935090
	10	51491280	rs377649173
	10	51491589	rs12781411
	10	51491927	rs10825187
	10	51492131	rs2926493
	10	51492713	rs4278470
	10	51493566	rs11591637
	10	51495110	rs11004221
	10	51495349	rs11004246
	10	51495685	rs79784258
	10	51496623	rs11004324
	10	51496796	rs2843562
	10	51497156	rs34135040
	10	51498019	rs11004409
	10	51498181	rs11004415
	10	51498336	rs11004422
	10	51498493	rs11004435
	10	51499655	rs11599333
	10	51500088	rs11004584
	10	51500301	rs2611502
	10	51500874	rs12763717
	10	51501277	rs66746805
	10	51501304	rs67289834
	10	51501966	rs138061577
	10	51502436	rs56244335
	10	51502552	rs55848837
	10	51502574	rs57858801
	10	51502612	rs57442251
	10	51502802	rs113082846
	10	51503178	rs2611475
	10	51503335	rs7071471
	10	51503375	rs7090326
	10	51503559	rs2611471
	10	51503977	rs12412140
	10	51504385	rs4935573
	10	51504493	rs745180
	10	51504604	rs2337711
	10	51504797	rs2012677
	10	51504938	rs10763193
	10	51505000	rs34974181
	10	51505403	rs898343
	10	51506284	rs4448631
	10	51506957	rs2125771
	10	51509258	rs10825587
	10	51509408	rs10763256
	10	51510203	rs61847060
	10	51510300	rs34115425
	10	51510482	rs11005075
	10	51510761	rs10825652
	10	51510813	rs11005089
	10	51512129	rs2843560
	10	51513871	rs2262569
	10	51514824	rs2125770
	10	51515457	rs2611513
	10	51515534	rs2611512
	10	51516252	rs2611509
	10	51516299	rs2843556
	10	51517356	rs2926494
	10	51518047	rs2611508
	10	51518084	rs35094615
	10	51518673	rs2611507
	10	51518688	rs2843546
	10	51518787	rs2611506
	10	51518906	rs2611505
	10	51518910	rs2611504
	10	51519154	rs57263518
	10	51519358	rs2843547
	10	51519516	rs2611486
	10	51520178	rs3032323
	10	51520203	rs3101227
	10	51520488	10:51520488
	10	51521247	rs2843549
	10	51521452	rs2843550
	10	51521684	rs2249986
	10	51521945	rs2843551
	10	51522120	rs7088225
	10	51522276	rs7077830
	10	51523213	rs1585378
	10	51523861	rs2843554
	10	51524274	rs2843555
	10	51524889	rs2611489
	10	51524971	rs3123078
	10	51525699	rs4935162
	10	51526093	rs7081532
	10	51528656	rs7915602
	10	51529379	rs7896156
	10	51529593	rs7896437
	10	51529746	rs6481329
	10	51530146	rs4554834
	10	51530505	rs10826125
	10	51530757	rs10826127
	10	51531805	rs4486572
	10	51532367	rs4581397
	10	51532621	rs7920517
	10	51532751	rs4630241
	10	51533376	rs9787697
	10	51534920	rs10763534
	10	51535801	rs10763536
	10	51535857	rs10763538
	10	51535931	rs10763539
	10	51535992	rs10826181
	10	51536399	rs10763546
	10	51537292	rs4131357
	10	51537431	rs7914347
	10	51537475	rs7911198
	10	51537653	rs4463804
	10	51538169	rs10763567
	10	51538176	rs11006207
	10	51538813	rs10763576
	10	51538915	rs11006223
	10	51539156	rs11593361
	10	51539256	rs10826227
	10	51539259	rs78865546
	10	51539271	rs28416634
	10	51539746	rs35494443
	10	51539762	rs10763588
	10	51540291	rs11006274
	10	51540860	rs4315013
	10	51540867	rs4630243
	10	51540906	rs4512771
	10	51542444	rs4306255
	10	51543070	rs7070301
	10	51543344	rs4631830
	10	51544143	rs7075009
	10	51544475	rs7098889
	10	51544587	rs4304716
	10	51544686	rs60822390
	10	51544692	rs7477953
	10	51545028	rs6481462
	10	51545813	rs11006462
	10	51546336	rs11006489
	10	51547002	rs34073986
	10	51547371	rs7075697
	10	51549496	rs10993994
	10	104398895	rs12764219
	10	104408272	rs12241712
	10	104410599	rs34269636
	10	104414221	rs3850699
	10	104415094	rs34032774
	10	104418228	rs12773600
	10	104418350	rs12773833
	10	104421679	rs12570611
	10	104422046	rs4522108
	10	104425471	rs7916092
	10	104428716	rs12262998
	10	104429746	rs7094325
	10	104432053	rs2002916
	10	104434630	rs12573077
	10	51531805	rs4486572
	10	51532751	rs4630241
	10	51533376	rs9787697
	10	51534920	rs10763534
	10	51535801	rs10763536
	10	51535857	rs10763538
	10	51535931	rs10763539
	10	51535992	rs10826181
	10	51536399	rs10763546
	10	51537292	rs4131357
	10	51537431	rs7914347
	10	51537475	rs7911198
	10	51537653	rs4463804
	10	51538169	rs10763567
	10	51538176	rs11006207
	10	51538813	rs10763576
	10	51538915	rs11006223
	10	51539156	rs11593361
	10	51539259	rs78865546
	10	51539271	rs28416634
	10	51539746	rs35494443
	10	51539762	rs10763588
	10	51540291	rs11006274
	10	51540906	rs4512771
	10	51544143	rs7075009
	10	51544475	rs7098889
	10	51544686	rs60822390
	10	51544692	rs7477953
	10	51545813	rs11006462
	10	51549496	rs10993994
	11	102396607	rs12285347
	11	102401661	rs11568818
	11	2224664	rs72853963
	11	2225626	rs10743176
	11	2225709	rs71029115
	11	2226789	rs71455920
	11	2226905	rs62650858
	11	2226969	rs144294078
	11	2227193	rs114099824
	11	2228618	rs10840584
	11	2228952	rs7126629
	11	2229012	rs7114836
	11	2229111	rs7126857
	11	2229360	rs7127162
	11	2229573	rs10743180
	11	2229759	rs10743181
	11	2229782	rs10743182
	11	2230152	rs4077456
	11	2230211	rs35506124
	11	2230354	rs4077457
	11	2230460	rs7481129
	11	2231341	rs4076054
	11	2231694	rs7395734
	11	2231774	rs6578999
	11	2232042	rs6579000
	11	2232056	rs6579001
	11	2232229	rs6579002
	11	2232272	rs7123180
	11	2232310	rs6579003
	11	2232344	rs7123299
	11	2232359	rs7123312
	11	2232378	rs7123418
	11	2232624	rs11043132
	11	2232665	rs11043133
	11	2232682	rs11043134
	11	2232696	rs11043135
	11	2232814	rs11603101
	11	2232911	rs7121039
	11	2233219	rs7109474
	11	2233234	rs7121452
	11	2233365	rs7127599
	11	2233485	rs66754298
	11	2233498	rs138751511
	11	2233574	rs7127900
	11	2233797	rs10840603
	11	2234093	rs11043143
	11	2234690	rs10840606
	11	68974555	rs12793759
	11	68981359	rs12275055
	11	68987168	rs71046509
	11	68990716	rs71046512
	11	68992285	rs12795301
	11	68995958	rs7130881
	11	69002342	rs11228580
	11	69003979	rs12417087
	12	114666099	rs2555009
	12	114668618	rs2555019
	12	114670663	rs2555016
	12	114671825	rs2701109
	12	114673421	rs1247943
	12	114678318	rs2555013
	12	114685571	rs1270884
	12	114686645	rs2555004
	12	49673158	rs11168963
	12	49676010	rs10875943
	12	53266739	rs73106451
	12	53267309	rs56207534
	12	53268073	rs147181250
	12	53270795	rs4919737
	12	53270971	rs4919740
	12	53271671	rs73108429
	12	53272015	rs11831919
	12	53272113	rs11831942
	12	53272964	rs4919742
	12	53273085	rs17746508
	12	53273208	rs73108440
	12	53273773	rs902772
	12	53273779	rs902773
	12	53273904	rs902774
	12	53274315	rs113950953
	12	53274499	rs112162741
	12	53274727	rs7301750
	12	53274768	rs7301912
	12	53274805	rs7302252
	12	53275037	rs11836041
	12	53275049	rs7133156
	12	53275538	rs139828754
	12	53275614	rs73108447
	12	53275701	rs115756021
	12	53275746	rs17689987
	12	53276029	rs7398573
	12	53276395	rs11836819
	12	53276900	rs73108453
	12	53276932	rs79377635
	12	53276938	rs75236700
	12	53277367	rs73108457
	12	53279623	rs4919763
	12	53282274	rs55914512
	12	53282471	rs151235305
	12	53283641	rs73108466
	12	53284360	rs55999178
	12	53284849	rs73108469
	12	53287835	rs73110432
	12	53289648	rs4919707
	12	53294747	rs56095813
	12	53298775	rs137898974
	12	53301019	rs55958994
	12	53303331	rs17120257
	12	53308932	rs113925811
	12	53309584	rs4919743
	12	53312612	rs73110464
	12	53316821	rs73110471
	13	73713447	rs7327286
	13	73715341	rs943559
	13	73716317	rs1108921
	13	73716626	rs4242949
	13	73716824	rs7489384
	13	73716861	rs7489409
	13	73717099	rs3929754
	13	73718258	rs67581291
	13	73719777	rs9543236
	13	73724876	rs12018601
	13	73724885	rs12018010
	13	73725334	rs57212342
	13	73725782	rs12184909
	13	73726211	rs9600077
	13	73727163	rs9600078
	13	73728139	rs9600079
	13	73728457	rs11619956
	13	73728540	rs11619950
	13	73728619	rs11619976
	13	73731968	rs9600080
	13	73734941	rs6562740
	13	73736210	rs11303466
	13	73736251	rs7318120
	13	73737046	rs7323629
	14	53309940	rs111448470
	14	53313097	rs74800104
	14	53316867	rs113907726
	14	53321246	rs74884304
	14	53321273	rs62003514
	14	53321340	rs62003515
	14	53330007	rs62003516
	14	53330720	14:53330720
	14	53331679	rs17694496
	14	53333116	rs62003517
	14	53348540	rs62003529
	14	53357111	rs62003532
	14	53365952	rs4901306
	14	53366323	rs1977350
	14	53366439	rs1570876
	14	53366923	rs6572870
	14	53367088	rs11281196
	14	53367793	rs8009956
	14	53368082	rs8014470
	14	53368232	rs12889169
	14	53368804	rs2358075
	14	53372330	rs8008270
	14	53375241	rs7140747
	14	53375302	rs7141054
	14	53378246	rs2147974
	14	53378360	rs2147976
	14	53379925	rs4901308
	14	53380014	rs4901309
	14	53386179	rs3037043
	14	53387109	rs4901313
	14	69126744	rs7141529
	14	69134264	rs767127
	17	36099840	rs11651755
	17	36099952	rs10908278
	17	36100767	rs11657964
	17	36101156	rs7501939
	17	36101586	rs8064454
	17	36102381	rs11651052
	17	36103565	rs11263763
	17	36103872	rs11658063
	17	36098987	rs4239217
	17	36100767	rs11657964
	17	36101156	rs7501939
	17	36103872	rs11658063
	17	47325867	rs117821438
	17	47333557	rs146575231
	17	47335348	rs146100660
	17	47335589	rs149261956
	17	47336931	rs74659133
	17	47339741	rs11653139
	17	47345186	rs11650494
	17	47348066	rs147125686
	17	47358308	rs73340392
	17	47362923	rs11650087
	17	47362991	rs11653686
	17	47364913	rs117087923
	17	47367753	rs148298271
	17	47370449	rs75904857
	17	47372328	rs77338752
	17	47372743	rs73340399
	17	47374886	rs57390430
	17	47378937	rs11651191
	17	47379867	rs140302625
	17	47382795	rs148171854
	17	47383994	rs11658111
	17	47384974	rs113056032
	17	47390136	rs11654557
	17	47395729	rs9907478
	17	47396628	rs76366926
	17	47398244	17:47398244
	17	47398245	17:47398245
	17	47398246	rs369322961
	17	47398282	rs78208413
	17	47399633	rs8076023
	17	47405338	rs73324308
	17	47407342	rs9891264
	17	47410521	rs140503890
	17	47410889	rs11653762
	17	47411493	rs77247327
	17	47411814	rs111834333
	17	47412578	rs75092916
	17	47420054	rs73324323
	17	47421593	rs117853079
	17	47421780	rs144202373
	17	47425588	rs11656535
	17	47431950	rs74830554
	17	47433192	rs140670503
	17	47433222	rs61286260
	17	47439989	rs36102386
	17	47445346	rs142415707
	17	47446968	rs79768864
	17	47447836	rs118099826
	17	47447950	rs117801358
	17	47448970	rs77488129
	17	47449193	rs11650886
	17	47452263	rs11655191
	17	47453471	rs146336970
	17	47454263	rs7216993
	17	47455752	rs73324348
	17	47456064	rs8065389
	17	47456754	rs11650001
	17	47457977	rs146060597
	17	506163	rs2360737
	17	519015	rs12450003
	17	534525	rs2002015
	17	555816	rs371318
	17	561782	rs379248
	17	562244	rs1833459
	17	568153	rs865702
	17	587729	rs866304
	17	598240	rs410157
	17	609506	rs331000
	17	609658	rs330999
	17	617059	rs2740358
	17	618039	rs2474694
	17	618408	rs2456274
	17	618965	rs684232
	17	619162	rs461251
	17	619842	rs1237094
	17	621782	rs394680
	17	623356	rs437948
	17	629896	rs450289
	17	630363	rs1741275
	17	69104938	rs7222314
	17	69106001	rs11293277
	17	69106742	rs17765332
	17	69106874	rs17765344
	17	69106888	rs113328478
	17	69106937	rs9908087
	17	69107018	rs9901566
	17	69107673	rs8071558
	17	69107816	rs8072254
	17	69108127	rs984434
	17	69108753	rs1859962
	17	69109773	rs991429
	17	69110923	rs7217073
	17	69110932	rs7216498
	17	69111221	rs56966654
	17	69113107	rs1859963
	17	69115146	rs9889335
	17	69115358	rs9911515
	17	69116935	rs8068266
	17	69117214	rs8072735
	17	69117532	rs148511027
	17	69118437	rs9893698
	17	69118636	rs4793529
	17	69119290	rs6501436
	17	69119972	rs6501437
	17	69120160	rs6501438
	18	76765837	rs6506878
	18	76767070	rs12162215
	18	76768773	rs7236307
	18	76769285	rs7233358
	18	76770820	rs9959454
	18	76772007	rs4799269
	18	76773566	rs7242245
	18	76773973	rs7241993
	18	76774276	rs9967549
	18	76774346	rs35479822
	18	76774347	rs34308254
	18	76774351	rs376949853
	18	76777252	rs71279357
	19	54792079	rs431420
	19	54793239	rs798888
	19	54793721	rs61703366
	19	54793830	rs798893
	19	54794098	rs397558
	19	54794205	rs419772
	19	54796630	rs416867
	19	54797848	rs103294
	19	54799083	rs380267
	19	54800423	YL_CN_PJL_4588
	19	54800500	rs367070
	19	38735480	rs8102454
	19	38735613	rs8102476
	19	38735804	rs11667256
	19	38738130	rs4802297
	19	38740925	rs12981216
	19	38743962	rs12976534
	19	38747449	rs10652797
	19	38750100	rs34582151
	19	41985587	rs11672691
	19	41985624	rs887391
	19	41985931	rs11673591
	19	41986217	rs2079811
	19	41986536	rs2316974
	19	41989711	rs8112363
	19	41999120	rs7248215
	19	42001210	rs2191139
	19	51360840	rs62113212
	19	51361757	rs17632542
	19	51362537	rs62113214
	19	51362715	rs76765083
	19	51365440	rs111362352
	20	61015611	rs2427345
	20	62336258	rs6062497
	20	62337406	rs6011040
	20	62339059	rs6062498
	20	62342468	rs3761123
	20	62343845	rs2315007
	20	62343956	rs2315008
	20	62347191	rs62217799
	20	62348190	rs4809327
	20	62348327	rs4809328
	20	62348460	rs4809329
	20	62348907	rs6062504
	20	62349586	rs4809330
	20	62351539	rs6062304
	20	62352389	rs6062506
	20	62352637	rs8125514
	20	62354144	rs6011057
	20	62356627	rs6011058
	20	62357866	20:62357866
	20	62362563	rs6062509
	20	62363651	rs56046298
	20	62363858	rs55791529
	20	62363869	rs55946717
	20	62364011	rs376244674
	20	62364180	rs6011066
	20	62369426	rs150938918
	20	62370349	rs1056441
	20	62372148	rs6062510
	20	62372706	rs4809221
	20	62373707	rs8957
	22	43498826	rs61307529
	22	43500212	rs5759167
	X	51190482	rs5945605
	X	51191157	rs5945606
	X	51193211	rs5945569
	X	51196825	rs80281212
	X	51197213	rs5987418
	X	51197711	rs4907790
	X	51198317	rs35020348
	X	51199205	rs5987419
	X	51199708	rs5945607
	X	51201595	rs11798651
	X	51202466	rs5945609
	X	51202545	rs5945610
	X	51204495	rs10284146
	X	51209186	rs146443651
	X	51210057	rs1327301
	X	51210615	rs1327302
	X	51211253	rs5945612
	X	51211390	rs7064089
	X	51214169	rs1327303
	X	51214176	rs1327304
	X	51218572	rs1854109
	X	51222598	rs5945571
	X	51223415	rs58498379
	X	51225162	rs35694749
	X	51226490	rs5987421
	X	51227221	rs5945617
	X	51228551	rs5945618
	X	51229683	rs5945572
	X	51235525	rs11091729
	X	51240078	rs28641581
	X	51241672	rs5945619
	X	51242303	rs5987397
	X	51242317	X:51242317
	X	51242317	rs5987423
	X	51242364	rs5987424
	X	51242881	rs5945621
	X	51245277	rs11338635
	X	51245461	rs1891702
	X	51246644	rs4907773
	X	51248783	rs4907792
	X	51249397	rs2384958
	X	51249762	rs66910447
	X	51251421	rs1936038
	X	51251800	rs6614419
	X	51252928	rs5945624
	X	51253427	rs5945625
	X	51253779	rs5945626
	X	51254350	rs5945573
	X	51255417	rs5945627
	X	51255779	rs200192129
	X	51255883	rs145020581
	X	51256561	rs146262091
	X	51256992	rs141135935
	X	51256998	rs201128567
	X	51259693	rs5987429
	X	51259966	rs6521804
	X	51260072	rs5945629
	X	51260246	rs146050469
	X	51260348	rs143723180
	X	51260521	rs7064349
	X	51260563	rs4907793
	X	51260880	rs4907794
	X	51261068	rs4907795
	X	51261249	rs4907796
	X	51263200	rs4907775
	X	51264424	rs6614426
	X	51266884	rs12388771
	X	51268378	rs1970956
	X	51268450	rs1970957
	X	51268884	rs5945631
	X	51269739	rs2153993
	X	51272085	rs6614427
	X	51272176	rs6614428
	X	51272476	rs59647730
	X	51272577	rs6614429
	X	51272865	rs6521808
	X	51274223	rs28838700
	X	51275125	rs78899665
	X	51275600	rs143812839
	X	51275819	rs78929143
	X	51276100	rs145384953
	X	51276274	rs149139611
	X	51277134	rs149592979
	X	51277898	rs139174061
	X	51278195	rs78914396
	X	51279295	rs6521809
	X	51279297	rs6614434
	X	51279678	X:51279678
	X	51279679	X:51279679
	X	51279731	rs148877102
	X	51279885	X:51279885
	X	51279886	X:51279886
	X	51280003	rs60513163
	X	51280005	rs61255884
	X	51280020	rs61537371
	X	51280077	rs56155607
	X	51280177	rs6614438
	X	51282499	rs4907776
	X	51282791	rs4907797
	X	51283113	rs6614313
	X	51283616	rs5945635
	X	51284837	rs6521810
	X	51285680	rs5987436
	X	51285741	rs5987437
	X	51286693	rs2185882
	X	51287789	rs1541241
	X	51288111	rs1541240
	X	51289760	rs1578828
	X	51290282	rs1592303
	X	51293965	rs6614443
	X	51293967	rs6614444
	X	51294365	rs76114974
	X	51296216	rs6521813
	X	51297046	rs4907800
	X	51297068	rs4907777
	X	51297736	rs4907778
	X	51297781	rs4907779
	X	51298031	rs4907780
	X	51304765	rs72539247
	X	51305144	rs2105379
	X	51307940	rs1343272
	X	51308981	rs5987438
	X	51309461	rs5945644
	X	51309801	rs6614317
	X	51310376	rs1936037
	X	51310821	rs1936036
	X	51313064	rs1361837
	X	51314397	rs5987440
	X	51316201	rs6614447
	X	51316259	rs1936035
	X	51317899	rs4457126
	X	51318466	rs4308906
	X	51322287	rs5945646
	X	51323372	rs5987442
	X	51324642	rs4907802
	X	51331485	rs5945647
	X	51333192	rs5945648
	X	51337608	rs5987402
	X	51338143	rs5945649
	X	51339327	rs5987444
	X	51340387	rs5945650
	X	51342435	rs7064708
	X	51342950	rs1936034
	X	51343494	rs5945651
	X	51343635	rs1541238

## Sheet: Supplemenatry Table 1b
	Supplemenatry Table 1b. List of hotspot somatic mutation for PC were used in this study.
	Chromosome	WinStart	WinEnd
	1	16302111	16302132
	1	87318756	87318777
	1	173029479	173029500
	2	47882226	47882247
	2	201623373	201623394
	3	47237022	47237043
	3	85116339	85116360
	3	85692789	85692810
	3	125392449	125392470
	3	195046635	195046656
	4	42116067	42116088
	4	66565464	66565485
	4	168680253	168680274
	5	12443949	12443970
	5	91915509	91915530
	5	162172605	162172626
	5	163184007	163184028
	6	73156440	73156461
	6	148983954	148983975
	7	22235556	22235577
	7	45523947	45523968
	7	48674136	48674157
	8	6010452	6010473
	8	36466773	36466794
	8	75093060	75093081
	8	78529122	78529143
	8	91356804	91356825
	9	21496818	21496839
	9	86194248	86194269
	9	100710561	100710582
	10	37413684	37413705
	10	85644048	85644069
	10	121892547	121892568
	10	129557442	129557463
	11	118605648	118605669
	12	18406395	18406416
	12	22780968	22780989
	12	53180736	53180757
	12	75783519	75783540
	12	87964506	87964527
	12	100728600	100728621
	13	59508813	59508834
	13	78983499	78983520
	14	35515326	35515347
	14	48448260	48448281
	15	24407985	24408006
	15	24407985	24408006
	15	55396047	55396068
	15	55396047	55396068
	15	77688828	77688849
	15	77688828	77688849
	16	82872825	82872846
	16	85318065	85318086
	16	87820362	87820383
	17	13673583	13673604
	17	61012056	61012077
	17	66312687	66312708
	17	66883278	66883299
	18	20131671	20131692
	18	25472454	25472475
	18	70051884	70051905
	19	22924104	22924125
	20	4312665	4312686
	20	8235444	8235465
	21	21465549	21465570
	21	22730253	22730274
	21	45131520	45131541
	22	36300432	36300453
	22	43701588	43701609
	22	50984997	50985018
	X	124667319	124667340

## Sheet: Supplemenatry Table 1c
	Supplementary Table 1c. List of statistically significance CNVRs for PC were used in this study.
	Chromosome	Start	End	Type
	10	122350084	125959174	Duplication
	10	73711338	129133534	Duplication
	10	66492733	71808998	Duplication
	10	74404227	87166156	Duplication
	10	46205785	48594285	Duplication
	10	132670985	135435575	Duplication
	10	90315639	92025709	Duplication
	10	96683725	99587022	Duplication
	10	110604239	111005605	Duplication
	10	107099713	108179952	Duplication
	10	105152393	105311053	Duplication
	10	59842001	63575627	Duplication
	10	19825563	39006575	Duplication
	10	113168721	119184715	Duplication
	11	2324446	23898245	Duplication
	11	44729793	55145349	Duplication
	11	69414097	69433420	Duplication
	11	114521249	134794834	Duplication
	5	21588445	23195291	Duplication
	5	10160913	13197115	Duplication
	5	19193871	19473251	Duplication
	5	49586584	54111114	Duplication
	5	85108030	85111203	Duplication
	5	57049627	179531721	Duplication
	5	34888192	45902810	Duplication
	5	175040386	175042043	Duplication
	5	1344431	1376435	Duplication
	5	118028813	144260397	Duplication
	5	75431218	82041025	Duplication
	5	68591802	68644283	Duplication
	5	62128941	63792726	Duplication
	5	101828235	106534465	Duplication
	5	163779968	165384573	Duplication
	6	14866191	39636830	Duplication
	6	9118354	10755114	Duplication
	6	44997373	45803835	Duplication
	6	168559412	170910378	Duplication
	6	50138852	58419127	Duplication
	6	132227880	157078739	Duplication
	6	70123577	97901456	Duplication
	4	98705546	98959225	Duplication
	4	21302963	29297515	Duplication
	4	72514575	145366865	Duplication
	4	117552781	135923202	Duplication
	4	140168370	140738552	Duplication
	4	33299960	44831657	Duplication
	4	188149756	190820458	Duplication
	4	67659567	69876366	Duplication
	2	230720959	231035090	Duplication
	2	194717947	195666695	Duplication
	2	235002697	235805033	Duplication
	2	217756002	220670296	Duplication
	2	212649970	215122931	Duplication
	2	209669009	210431302	Duplication
	2	233476970	233483393	Duplication
	2	188811135	190422429	Duplication
	2	71524901	71658457	Duplication
	2	251988	2441353	Duplication
	2	174938667	180984759	Duplication
	2	95902573	100330074	Duplication
	2	86281875	88831307	Duplication
	2	59387877	61095407	Duplication
	2	44533165	54752245	Duplication
	2	17023846	18344852	Duplication
	2	14349664	15216834	Duplication
	2	10166024	11497987	Duplication
	2	6887688	6897522	Duplication
	2	25907970	239801004	Duplication
	2	241411035	242337075	Duplication
	2	83990864	84466789	Duplication
	2	162280167	168637204	Duplication
	2	106859467	112282525	Duplication
	2	155832038	156179199	Duplication
	2	117697061	118252949	Duplication
	2	34594266	36135418	Duplication
	2	142618563	145298650	Duplication
	2	40248605	41770142	Duplication
	2	129043628	134541897	Duplication
	1	189071987	198632314	Duplication
	1	159803875	162364384	Duplication
	1	61000968	61073173	Duplication
	1	99711830	116499388	Duplication
	1	242743749	248538824	Duplication
	1	213752028	231811457	Duplication
	1	86292518	91855186	Duplication
	1	3587071	3810009	Duplication
	1	39487268	170417531	Duplication
	1	17403943	17437540	Duplication
	1	11465384	11536217	Duplication
	1	46297485	51603729	Duplication
	1	71592553	82358327	Duplication
	1	28835165	30726169	Duplication
	8	140020794	142629482	Duplication
	8	76759638	79298585	Duplication
	8	146254080	146303902	Duplication
	8	125868816	126434421	Duplication
	8	109339712	112722358	Duplication
	8	118271200	119766700	Duplication
	8	95655795	95678386	Duplication
	8	100213795	103238359	Duplication
	8	89844256	91733304	Duplication
	8	43166488	43749936	Duplication
	8	135111204	135121385	Duplication
	8	16433084	21129578	Duplication
	8	59478951	59534210	Duplication
	8	24881878	27301401	Duplication
	8	39100134	41110281	Duplication
	3	145222066	145268797	Duplication
	3	155037216	155771663	Duplication
	3	43344502	147606493	Duplication
	3	99235499	122659564	Duplication
	3	1948065	13247850	Duplication
	3	75597940	90362994	Duplication
	3	59873181	70199500	Duplication
	3	183336533	197832761	Duplication
	3	19604967	27400689	Duplication
	22	19889064	21966122	Duplication
	22	38853265	39682747	Duplication
	22	29807501	33477017	Duplication
	22	27408610	33729559	Duplication
	22	37256225	37262844	Duplication
	22	45888460	45913042	Duplication
	22	50502466	51078951	Duplication
	22	24337410	26015246	Duplication
	17	64247549	67636813	Duplication
	17	61542192	62069215	Duplication
	17	52997184	53254373	Duplication
	17	4207624	4460300	Duplication
	17	26048876	26745374	Duplication
	17	79816170	81007855	Duplication
	17	1244575	1462624	Duplication
	17	43716060	69064491	Duplication
	17	46153456	47211753	Duplication
	17	33510888	36213855	Duplication
	17	31766081	31770405	Duplication
	17	7196105	21414492	Duplication
	17	39661013	41959643	Duplication
	16	46463561	47666778	Duplication
	16	28578164	29352807	Duplication
	16	21610363	23616407	Duplication
	16	17334901	18141500	Duplication
	16	12904057	13649689	Duplication
	16	34835224	34841353	Duplication
	16	24205332	27324945	Duplication
	16	58041666	58496171	Duplication
	16	50688165	50888604	Duplication
	16	60943102	62529858	Duplication
	16	52817103	66611327	Duplication
	16	85716	1414926	Duplication
	16	74331695	90164754	Duplication
	16	31778026	32020170	Duplication
	19	23654101	58593334	Duplication
	19	15196562	20867463	Duplication
	19	3923091	9245971	Duplication
	19	50365038	55624854	Duplication
	9	72679887	80016577	Duplication
	9	83834679	122229018	Duplication
	9	101338785	110662858	Duplication
	9	13685775	38389962	Duplication
	9	138219404	141072662	Duplication
	12	48745631	48758474	Duplication
	12	117831498	118088578	Duplication
	12	109298352	115044682	Duplication
	12	66524454	67665087	Duplication
	12	57258242	64406084	Duplication
	12	128225201	133800881	Duplication
	12	91906229	105944507	Duplication
	12	38860176	45788955	Duplication
	12	82703610	88815636	Duplication
	12	15132272	64719500	Duplication
	12	31355615	34431935	Duplication
	12	19088102	25637253	Duplication
	12	8940166	13080944	Duplication
	7	22810763	22815234	Duplication
	7	48780148	138052835	Duplication
	7	150979201	159040420	Duplication
	21	15941347	16029398	Duplication
	21	42827936	48077600	Duplication
	20	31902061	52713745	Duplication
	20	62891341	62915351	Duplication
	20	45705375	50491368	Duplication
	20	7665032	26271041	Duplication
	13	103712336	115109896	Duplication
	13	36302170	36970878	Duplication
	13	24913042	24923412	Duplication
	13	50113572	101510586	Duplication
	13	79967354	88299048	Duplication
	13	75414899	76551443	Duplication
	13	57694085	72812361	Duplication
	13	47536613	47588821	Duplication
	13	96001416	96015060	Duplication
	13	33396504	34538326	Duplication
	15	31617781	39113865	Duplication
	15	44020453	46486276	Duplication
	15	75667741	79748179	Duplication
	15	67032054	69522447	Duplication
	15	97790015	102294690	Duplication
	15	54132170	66429777	Duplication
	18	9690513	14838588	Duplication
	18	2634219	4894442	Duplication
	18	54320726	54337630	Duplication
	18	49177778	49757216	Duplication
	18	58334103	78000086	Duplication
	18	22350795	45734592	Duplication
	14	55623280	57200203	Duplication
	14	53744123	53767803	Duplication
	14	42963334	50195691	Duplication
	14	25144283	28522642	Duplication
	14	21806181	21995659	Duplication
	14	107250311	107289542	Duplication
	14	77851765	78633261	Duplication
	14	75103618	75662662	Duplication
	14	94506497	106083160	Duplication
	14	84498796	91074011	Duplication
	14	59349717	79794257	Duplication
	14	63939085	65742380	Duplication
	10	25575798	26377185	Deletion
	10	23312936	23370991	Deletion
	10	2600756	4311561	Deletion
	10	92924518	110662021	Deletion
	10	11683742	18614840	Deletion
	10	45410835	120057673	Deletion
	11	69413968	69427990	Deletion
	11	120000339	120665230	Deletion
	11	100784434	101383689	Deletion
	6	140954751	141456050	Deletion
	6	163937065	166469296	Deletion
	6	149290257	151518168	Deletion
	6	143606931	148033263	Deletion
	6	66496636	67858927	Deletion
	6	158716651	168248406	Deletion
	6	115168792	127188090	Deletion
	6	88032749	104745570	Deletion
	8	40946414	43666819	Deletion
	8	6187595	6980246	Deletion
	8	47021618	48911282	Deletion
	8	22914565	49667274	Deletion
	8	28895258	31650820	Deletion
	8	23679094	25764820	Deletion
	8	10465329	22205568	Deletion
	8	38452287	38452468	Deletion
	8	33656781	36519307	Deletion
	5	49542520	137385131	Deletion
	5	46398184	46399028	Deletion
	5	71173050	80847263	Deletion
	5	61697660	68471149	Deletion
	5	98761465	127778244	Deletion
	2	174508098	174549256	Deletion
	2	126549731	163190382	Deletion
	2	39438282	51112194	Deletion
	13	114094001	114095001	Deletion
	13	105001837	105273630	Deletion
	13	54600594	72898441	Deletion
	13	37871693	51515899	Deletion
	13	91475864	102283099	Deletion
	22	18124843	21638769	Deletion
	22	43475921	51057493	Deletion
	22	25659128	32906359	Deletion
	17	1254003	15703004	Deletion
	17	41204071	45566905	Deletion
	19	10422008	10423117	Deletion
	19	42704579	43194899	Deletion
	21	37696363	47009147	Deletion
	21	41095389	43013600	Deletion
	20	20736960	22469378	Deletion
	20	11980904	16748302	Deletion
	20	5568988	8223593	Deletion
	20	25096753	25221867	Deletion
	16	924758	1000193	Deletion
	16	89269034	90048955	Deletion
	1	215004580	217295598	Deletion
	1	236476469	241053633	Deletion
	1	85910985	98814501	Deletion
	1	2371994	3668383	Deletion
	1	8976892	9622149	Deletion
	1	64388095	67324297	Deletion
	18	2635652	14151056	Deletion
	18	59448218	77999242	Deletion
	18	23436065	42152643	Deletion
	3	187832913	188136830	Deletion
	3	72735680	82320238	Deletion
	3	196558301	197457948	Deletion
	12	128840477	132302426	Deletion
	12	125119244	125124426	Deletion
	12	13000469	38349001	Deletion
	15	39562630	43082600	Deletion
	9	15310913	15608663	Deletion
	9	138274571	138345445	Deletion
	14	92668223	97051714	Deletion
	14	75607023	85893512	Deletion
	4	127468200	180741242	Deletion
