# Supplementary material for: An Integrative Analysis of Chromatin Interactions, Gene Expression and Genomic Variants Identifies 30 Likely Regulatory Variants in Prostate Cancer
Source: Preprints.org preprint supplement (doi:10.20944/preprints202301.0343.v1), 2023-01-19
Supplement: Supplementary file 2 [file SupplementaryTable10.xlsx]

## Sheet: Supplementary Table10
	Supplementary Table 10. Definition of promoter regions
	Consortia	Strand	Start position (TSS)	End position
	Ensembl/ ENCODE	+	TSS - 2000	TSS + 500
		-	End position - 500	End position + 2000
	Fantom5	+/-	TSS - 2000	TSS + 500
