# Supplementary material for: An Integrative Analysis of Chromatin Interactions, Gene Expression and Genomic Variants Identifies 30 Likely Regulatory Variants in Prostate Cancer
Source: Preprints.org preprint supplement (doi:10.20944/preprints202301.0343.v1), 2023-01-19
Supplement: Supplementary file 3 [file SupplementaryTable2.xlsx]

## Sheet: Supplementary Table 2a
Supplementary Table 2a. List of identified SNP-affected genes for PC
Chromosome	Start	End	Strand	GeneID	Project	GeneName	GeneClass
1	154668925	154842757	-	ENSG00000143603	FANTOM5	'KCNN3'	protein_coding
1	204391557	204464624	-	ENSG00000133056	FANTOM5	'PIK3C2B'	protein_coding
1	204391557	204464624	-	ENSG00000133056	FANTOM5	'PIK3C2B'	protein_coding
1	204391557	204464624	-	ENSG00000133056	FANTOM5	'PIK3C2B'	protein_coding
1	204391557	204464624	-	ENSG00000133056	FANTOM5	'PIK3C2B'	protein_coding
1	204391557	204464624	-	ENSG00000133056	FANTOM5	'PIK3C2B'	protein_coding
1	204391557	204464624	-	ENSG00000133056	FANTOM5	'PIK3C2B'	protein_coding
1	204391557	204464624	-	ENSG00000133056	FANTOM5	'PIK3C2B'	protein_coding
1	204391557	204464624	-	ENSG00000133056	FANTOM5	'PIK3C2B'	protein_coding
1	204391557	204464624	-	ENSG00000133056	FANTOM5	'PIK3C2B'	protein_coding
1	204391557	204464624	-	ENSG00000133056	FANTOM5	'PIK3C2B'	protein_coding
1	204391557	204464624	-	ENSG00000133056	FANTOM5	'PIK3C2B'	protein_coding
1	204391557	204464624	-	ENSG00000133056	FANTOM5	'PIK3C2B'	protein_coding
1	204391557	204464624	-	ENSG00000133056	FANTOM5	'PIK3C2B'	protein_coding
1	204391557	204464624	-	ENSG00000133056	FANTOM5	'PIK3C2B'	protein_coding
1	204391557	204464624	-	ENSG00000133056	FANTOM5	'PIK3C2B'	protein_coding
1	204391557	204464624	-	ENSG00000133056	FANTOM5	'PIK3C2B'	protein_coding
1	204391557	204464624	-	ENSG00000133056	FANTOM5	'PIK3C2B'	protein_coding
1	204463488	204465257	+	CATG00000032004	FANTOM5	'CATG00000032004.1'	noncoding_lncRNA_divergent
1	204391557	204464624	-	ENSG00000133056	FANTOM5	'PIK3C2B'	protein_coding
1	204463488	204465257	+	CATG00000032004	FANTOM5	'CATG00000032004.1'	noncoding_lncRNA_divergent
1	204391557	204464624	-	ENSG00000133056	FANTOM5	'PIK3C2B'	protein_coding
1	204485537	204584721	+	ENSG00000198625	FANTOM5	'MDM4'	protein_coding
1	204485537	204584721	+	ENSG00000198625	FANTOM5	'MDM4'	protein_coding
1	204485537	204584721	+	ENSG00000198625	FANTOM5	'MDM4'	protein_coding
1	204485537	204584721	+	ENSG00000198625	FANTOM5	'MDM4'	protein_coding
1	204485537	204584721	+	ENSG00000198625	FANTOM5	'MDM4'	protein_coding
1	204485537	204584721	+	ENSG00000198625	FANTOM5	'MDM4'	protein_coding
1	204485537	204584721	+	ENSG00000198625	FANTOM5	'MDM4'	protein_coding
1	204497432	204498235	-	ENSG00000236779	FANTOM5	'RP11-430C7.2'	noncoding_pseudogene
1	204485537	204584721	+	ENSG00000198625	FANTOM5	'MDM4'	protein_coding
1	204485537	204584721	+	ENSG00000198625	FANTOM5	'MDM4'	protein_coding
1	204485537	204584721	+	ENSG00000198625	FANTOM5	'MDM4'	protein_coding
1	204485537	204584721	+	ENSG00000198625	FANTOM5	'MDM4'	protein_coding
1	204485537	204584721	+	ENSG00000198625	FANTOM5	'MDM4'	protein_coding
1	204485537	204584721	+	ENSG00000198625	FANTOM5	'MDM4'	protein_coding
1	204485537	204584721	+	ENSG00000198625	FANTOM5	'MDM4'	protein_coding
1	204485537	204584721	+	ENSG00000198625	FANTOM5	'MDM4'	protein_coding
1	204485537	204584721	+	ENSG00000198625	FANTOM5	'MDM4'	protein_coding
1	204485537	204584721	+	ENSG00000198625	FANTOM5	'MDM4'	protein_coding
1	204485537	204584721	+	ENSG00000198625	FANTOM5	'MDM4'	protein_coding
1	204485537	204584721	+	ENSG00000198625	FANTOM5	'MDM4'	protein_coding
1	204485537	204584721	+	ENSG00000198625	FANTOM5	'MDM4'	protein_coding
1	204485537	204584721	+	ENSG00000198625	FANTOM5	'MDM4'	protein_coding
1	204485537	204584721	+	ENSG00000198625	FANTOM5	'MDM4'	protein_coding
1	204485537	204584721	+	ENSG00000198625	FANTOM5	'MDM4'	protein_coding
1	204485537	204584721	+	ENSG00000198625	FANTOM5	'MDM4'	protein_coding
1	204485537	204584721	+	ENSG00000198625	FANTOM5	'MDM4'	protein_coding
1	204485537	204584721	+	ENSG00000198625	FANTOM5	'MDM4'	protein_coding
1	204485537	204584721	+	ENSG00000198625	FANTOM5	'MDM4'	protein_coding
1	204485537	204584721	+	ENSG00000198625	FANTOM5	'MDM4'	protein_coding
1	204485537	204584721	+	ENSG00000198625	FANTOM5	'MDM4'	protein_coding
1	204485537	204584721	+	ENSG00000198625	FANTOM5	'MDM4'	protein_coding
1	204485537	204584721	+	ENSG00000198625	FANTOM5	'MDM4'	protein_coding
1	204485537	204584721	+	ENSG00000198625	FANTOM5	'MDM4'	protein_coding
1	204485537	204584721	+	ENSG00000198625	FANTOM5	'MDM4'	protein_coding
1	204485537	204584721	+	ENSG00000198625	FANTOM5	'MDM4'	protein_coding
1	204485537	204584721	+	ENSG00000198625	FANTOM5	'MDM4'	protein_coding
1	204485537	204584721	+	ENSG00000198625	FANTOM5	'MDM4'	protein_coding
2	10091240	10147336	+	ENSG00000134317	FANTOM5	'GRHL1'	protein_coding
2	173092818	173371237	+	ENSG00000091409	FANTOM5	'ITGA6'	protein_coding
2	173092818	173371237	+	ENSG00000091409	FANTOM5	'ITGA6'	protein_coding
2	173092818	173371237	+	ENSG00000091409	FANTOM5	'ITGA6'	protein_coding
2	173092818	173371237	+	ENSG00000091409	FANTOM5	'ITGA6'	protein_coding
2	173092818	173371237	+	ENSG00000091409	FANTOM5	'ITGA6'	protein_coding
2	173092818	173371237	+	ENSG00000091409	FANTOM5	'ITGA6'	protein_coding
2	173092818	173371237	+	ENSG00000091409	FANTOM5	'ITGA6'	protein_coding
2	173092818	173371237	+	ENSG00000091409	FANTOM5	'ITGA6'	protein_coding
2	173092818	173371237	+	ENSG00000091409	FANTOM5	'ITGA6'	protein_coding
2	173092818	173371237	+	ENSG00000091409	FANTOM5	'ITGA6'	protein_coding
2	173092818	173371237	+	ENSG00000091409	FANTOM5	'ITGA6'	protein_coding
2	173092818	173371237	+	ENSG00000091409	FANTOM5	'ITGA6'	protein_coding
2	173092818	173371237	+	ENSG00000091409	FANTOM5	'ITGA6'	protein_coding
2	173092818	173371237	+	ENSG00000091409	FANTOM5	'ITGA6'	protein_coding
2	173092818	173371237	+	ENSG00000091409	FANTOM5	'ITGA6'	protein_coding
2	173092818	173371237	+	ENSG00000091409	FANTOM5	'ITGA6'	protein_coding
2	173092818	173371237	+	ENSG00000091409	FANTOM5	'ITGA6'	protein_coding
2	173092818	173371237	+	ENSG00000091409	FANTOM5	'ITGA6'	protein_coding
2	173092818	173371237	+	ENSG00000091409	FANTOM5	'ITGA6'	protein_coding
2	173092818	173371237	+	ENSG00000091409	FANTOM5	'ITGA6'	protein_coding
2	173092818	173371237	+	ENSG00000091409	FANTOM5	'ITGA6'	protein_coding
2	173092818	173371237	+	ENSG00000091409	FANTOM5	'ITGA6'	protein_coding
2	173092818	173371237	+	ENSG00000091409	FANTOM5	'ITGA6'	protein_coding
2	173092818	173371237	+	ENSG00000091409	FANTOM5	'ITGA6'	protein_coding
2	173092818	173371237	+	ENSG00000091409	FANTOM5	'ITGA6'	protein_coding
2	173092818	173371237	+	ENSG00000091409	FANTOM5	'ITGA6'	protein_coding
2	173092818	173371237	+	ENSG00000091409	FANTOM5	'ITGA6'	protein_coding
2	173092818	173371237	+	ENSG00000091409	FANTOM5	'ITGA6'	protein_coding
2	173092818	173371237	+	ENSG00000091409	FANTOM5	'ITGA6'	protein_coding
2	173092818	173371237	+	ENSG00000091409	FANTOM5	'ITGA6'	protein_coding
2	173092818	173371237	+	ENSG00000091409	FANTOM5	'ITGA6'	protein_coding
2	173092818	173371237	+	ENSG00000091409	FANTOM5	'ITGA6'	protein_coding
2	173092818	173371237	+	ENSG00000091409	FANTOM5	'ITGA6'	protein_coding
2	173092818	173371237	+	ENSG00000091409	FANTOM5	'ITGA6'	protein_coding
2	173092818	173371237	+	ENSG00000091409	FANTOM5	'ITGA6'	protein_coding
2	173092818	173371237	+	ENSG00000091409	FANTOM5	'ITGA6'	protein_coding
2	173092818	173371237	+	ENSG00000091409	FANTOM5	'ITGA6'	protein_coding
2	173092818	173371237	+	ENSG00000091409	FANTOM5	'ITGA6'	protein_coding
2	173092818	173371237	+	ENSG00000091409	FANTOM5	'ITGA6'	protein_coding
2	173092818	173371237	+	ENSG00000091409	FANTOM5	'ITGA6'	protein_coding
2	173092818	173371237	+	ENSG00000091409	FANTOM5	'ITGA6'	protein_coding
2	173092818	173371237	+	ENSG00000091409	FANTOM5	'ITGA6'	protein_coding
2	173092818	173371237	+	ENSG00000091409	FANTOM5	'ITGA6'	protein_coding
2	173092818	173371237	+	ENSG00000091409	FANTOM5	'ITGA6'	protein_coding
2	173092818	173371237	+	ENSG00000091409	FANTOM5	'ITGA6'	protein_coding
2	173328957	173421168	-	ENSG00000225205	FANTOM5	'AC093818.1'	noncoding_lncRNA_divergent
2	173092818	173371237	+	ENSG00000091409	FANTOM5	'ITGA6'	protein_coding
2	173328957	173421168	-	ENSG00000225205	FANTOM5	'AC093818.1'	noncoding_lncRNA_divergent
2	173092818	173371237	+	ENSG00000091409	FANTOM5	'ITGA6'	protein_coding
2	173328957	173421168	-	ENSG00000225205	FANTOM5	'AC093818.1'	noncoding_lncRNA_divergent
2	173092818	173371237	+	ENSG00000091409	FANTOM5	'ITGA6'	protein_coding
2	173328957	173421168	-	ENSG00000225205	FANTOM5	'AC093818.1'	noncoding_lncRNA_divergent
2	173092818	173371237	+	ENSG00000091409	FANTOM5	'ITGA6'	protein_coding
2	173328957	173421168	-	ENSG00000225205	FANTOM5	'AC093818.1'	noncoding_lncRNA_divergent
2	173092818	173371237	+	ENSG00000091409	FANTOM5	'ITGA6'	protein_coding
2	173328957	173421168	-	ENSG00000225205	FANTOM5	'AC093818.1'	noncoding_lncRNA_divergent
2	173092818	173371237	+	ENSG00000091409	FANTOM5	'ITGA6'	protein_coding
2	173328957	173421168	-	ENSG00000225205	FANTOM5	'AC093818.1'	noncoding_lncRNA_divergent
2	173092818	173371237	+	ENSG00000091409	FANTOM5	'ITGA6'	protein_coding
2	173328957	173421168	-	ENSG00000225205	FANTOM5	'AC093818.1'	noncoding_lncRNA_divergent
2	173092818	173371237	+	ENSG00000091409	FANTOM5	'ITGA6'	protein_coding
2	173328957	173421168	-	ENSG00000225205	FANTOM5	'AC093818.1'	noncoding_lncRNA_divergent
2	173092818	173371237	+	ENSG00000091409	FANTOM5	'ITGA6'	protein_coding
2	173328957	173421168	-	ENSG00000225205	FANTOM5	'AC093818.1'	noncoding_lncRNA_divergent
2	173092818	173371237	+	ENSG00000091409	FANTOM5	'ITGA6'	protein_coding
2	173328957	173421168	-	ENSG00000225205	FANTOM5	'AC093818.1'	noncoding_lncRNA_divergent
2	173092818	173371237	+	ENSG00000091409	FANTOM5	'ITGA6'	protein_coding
2	173328957	173421168	-	ENSG00000225205	FANTOM5	'AC093818.1'	noncoding_lncRNA_divergent
2	173092818	173371237	+	ENSG00000091409	FANTOM5	'ITGA6'	protein_coding
2	173328957	173421168	-	ENSG00000225205	FANTOM5	'AC093818.1'	noncoding_lncRNA_divergent
2	173092818	173371237	+	ENSG00000091409	FANTOM5	'ITGA6'	protein_coding
2	173328957	173421168	-	ENSG00000225205	FANTOM5	'AC093818.1'	noncoding_lncRNA_divergent
2	173328957	173421168	-	ENSG00000225205	FANTOM5	'AC093818.1'	noncoding_lncRNA_divergent
2	173328957	173421168	-	ENSG00000225205	FANTOM5	'AC093818.1'	noncoding_lncRNA_divergent
2	173328957	173421168	-	ENSG00000225205	FANTOM5	'AC093818.1'	noncoding_lncRNA_divergent
2	173328957	173421168	-	ENSG00000225205	FANTOM5	'AC093818.1'	noncoding_lncRNA_divergent
2	173328957	173421168	-	ENSG00000225205	FANTOM5	'AC093818.1'	noncoding_lncRNA_divergent
2	173328957	173421168	-	ENSG00000225205	FANTOM5	'AC093818.1'	noncoding_lncRNA_divergent
2	173328957	173421168	-	ENSG00000225205	FANTOM5	'AC093818.1'	noncoding_lncRNA_divergent
2	173328957	173421168	-	ENSG00000225205	FANTOM5	'AC093818.1'	noncoding_lncRNA_divergent
2	173328957	173421168	-	ENSG00000225205	FANTOM5	'AC093818.1'	noncoding_lncRNA_divergent
2	173328957	173421168	-	ENSG00000225205	FANTOM5	'AC093818.1'	noncoding_lncRNA_divergent
2	173328957	173421168	-	ENSG00000225205	FANTOM5	'AC093818.1'	noncoding_lncRNA_divergent
2	173328957	173421168	-	ENSG00000225205	FANTOM5	'AC093818.1'	noncoding_lncRNA_divergent
2	173328957	173421168	-	ENSG00000225205	FANTOM5	'AC093818.1'	noncoding_lncRNA_divergent
2	173328957	173421168	-	ENSG00000225205	FANTOM5	'AC093818.1'	noncoding_lncRNA_divergent
2	173328957	173421168	-	ENSG00000225205	FANTOM5	'AC093818.1'	noncoding_lncRNA_divergent
2	173328957	173421168	-	ENSG00000225205	FANTOM5	'AC093818.1'	noncoding_lncRNA_divergent
2	173328957	173421168	-	ENSG00000225205	FANTOM5	'AC093818.1'	noncoding_lncRNA_divergent
2	173328957	173421168	-	ENSG00000225205	FANTOM5	'AC093818.1'	noncoding_lncRNA_divergent
2	173328957	173421168	-	ENSG00000225205	FANTOM5	'AC093818.1'	noncoding_lncRNA_divergent
2	173398852	173410475	+	CATG00000045523	FANTOM5	'CATG00000045523.1'	noncoding_lncRNA_intergenic
2	173328957	173421168	-	ENSG00000225205	FANTOM5	'AC093818.1'	noncoding_lncRNA_divergent
2	173398852	173410475	+	CATG00000045523	FANTOM5	'CATG00000045523.1'	noncoding_lncRNA_intergenic
2	173328957	173421168	-	ENSG00000225205	FANTOM5	'AC093818.1'	noncoding_lncRNA_divergent
2	173398852	173410475	+	CATG00000045523	FANTOM5	'CATG00000045523.1'	noncoding_lncRNA_intergenic
2	173328957	173421168	-	ENSG00000225205	FANTOM5	'AC093818.1'	noncoding_lncRNA_divergent
2	173398852	173410475	+	CATG00000045523	FANTOM5	'CATG00000045523.1'	noncoding_lncRNA_intergenic
2	173328957	173421168	-	ENSG00000225205	FANTOM5	'AC093818.1'	noncoding_lncRNA_divergent
2	173398852	173410475	+	CATG00000045523	FANTOM5	'CATG00000045523.1'	noncoding_lncRNA_intergenic
2	173328957	173421168	-	ENSG00000225205	FANTOM5	'AC093818.1'	noncoding_lncRNA_divergent
2	173398852	173410475	+	CATG00000045523	FANTOM5	'CATG00000045523.1'	noncoding_lncRNA_intergenic
2	173328957	173421168	-	ENSG00000225205	FANTOM5	'AC093818.1'	noncoding_lncRNA_divergent
2	173398852	173410475	+	CATG00000045523	FANTOM5	'CATG00000045523.1'	noncoding_lncRNA_intergenic
2	173328957	173421168	-	ENSG00000225205	FANTOM5	'AC093818.1'	noncoding_lncRNA_divergent
2	173398852	173410475	+	CATG00000045523	FANTOM5	'CATG00000045523.1'	noncoding_lncRNA_intergenic
2	173328957	173421168	-	ENSG00000225205	FANTOM5	'AC093818.1'	noncoding_lncRNA_divergent
2	173398852	173410475	+	CATG00000045523	FANTOM5	'CATG00000045523.1'	noncoding_lncRNA_intergenic
2	173328957	173421168	-	ENSG00000225205	FANTOM5	'AC093818.1'	noncoding_lncRNA_divergent
2	173398852	173410475	+	CATG00000045523	FANTOM5	'CATG00000045523.1'	noncoding_lncRNA_intergenic
2	173328957	173421168	-	ENSG00000225205	FANTOM5	'AC093818.1'	noncoding_lncRNA_divergent
2	173398852	173410475	+	CATG00000045523	FANTOM5	'CATG00000045523.1'	noncoding_lncRNA_intergenic
2	173328957	173421168	-	ENSG00000225205	FANTOM5	'AC093818.1'	noncoding_lncRNA_divergent
2	173398852	173410475	+	CATG00000045523	FANTOM5	'CATG00000045523.1'	noncoding_lncRNA_intergenic
2	173328957	173421168	-	ENSG00000225205	FANTOM5	'AC093818.1'	noncoding_lncRNA_divergent
2	173398852	173410475	+	CATG00000045523	FANTOM5	'CATG00000045523.1'	noncoding_lncRNA_intergenic
2	173328957	173421168	-	ENSG00000225205	FANTOM5	'AC093818.1'	noncoding_lncRNA_divergent
2	173398852	173410475	+	CATG00000045523	FANTOM5	'CATG00000045523.1'	noncoding_lncRNA_intergenic
2	173328957	173421168	-	ENSG00000225205	FANTOM5	'AC093818.1'	noncoding_lncRNA_divergent
2	173398852	173410475	+	CATG00000045523	FANTOM5	'CATG00000045523.1'	noncoding_lncRNA_intergenic
2	173328957	173421168	-	ENSG00000225205	FANTOM5	'AC093818.1'	noncoding_lncRNA_divergent
2	173398852	173410475	+	CATG00000045523	FANTOM5	'CATG00000045523.1'	noncoding_lncRNA_intergenic
2	173328957	173421168	-	ENSG00000225205	FANTOM5	'AC093818.1'	noncoding_lncRNA_divergent
2	173328957	173421168	-	ENSG00000225205	FANTOM5	'AC093818.1'	noncoding_lncRNA_divergent
2	238352654	238362392	-	CATG00000052046	FANTOM5	'CATG00000052046.1'	protein_coding
2	238352654	238362392	-	CATG00000052046	FANTOM5	'CATG00000052046.1'	protein_coding
2	238352654	238362392	-	CATG00000052046	FANTOM5	'CATG00000052046.1'	protein_coding
2	238352654	238362392	-	CATG00000052046	FANTOM5	'CATG00000052046.1'	protein_coding
2	238352654	238362392	-	CATG00000052046	FANTOM5	'CATG00000052046.1'	protein_coding
2	238352654	238362392	-	CATG00000052046	FANTOM5	'CATG00000052046.1'	protein_coding
2	238352654	238362392	-	CATG00000052046	FANTOM5	'CATG00000052046.1'	protein_coding
2	238366670	238374291	-	CATG00000052047	FANTOM5	'CATG00000052047.1'	noncoding_lncRNA_intergenic
2	238366670	238374291	-	CATG00000052047	FANTOM5	'CATG00000052047.1'	noncoding_lncRNA_intergenic
2	238366670	238374291	-	CATG00000052047	FANTOM5	'CATG00000052047.1'	noncoding_lncRNA_intergenic
2	238366670	238374291	-	CATG00000052047	FANTOM5	'CATG00000052047.1'	noncoding_lncRNA_intergenic
2	238366670	238374291	-	CATG00000052047	FANTOM5	'CATG00000052047.1'	noncoding_lncRNA_intergenic
2	238366670	238374291	-	CATG00000052047	FANTOM5	'CATG00000052047.1'	noncoding_lncRNA_intergenic
2	238366670	238374291	-	CATG00000052047	FANTOM5	'CATG00000052047.1'	noncoding_lncRNA_intergenic
2	238366670	238374291	-	CATG00000052047	FANTOM5	'CATG00000052047.1'	noncoding_lncRNA_intergenic
2	238366670	238374291	-	CATG00000052047	FANTOM5	'CATG00000052047.1'	noncoding_lncRNA_intergenic
2	238366670	238374291	-	CATG00000052047	FANTOM5	'CATG00000052047.1'	noncoding_lncRNA_intergenic
2	238366670	238374291	-	CATG00000052047	FANTOM5	'CATG00000052047.1'	noncoding_lncRNA_intergenic
2	238366670	238374291	-	CATG00000052047	FANTOM5	'CATG00000052047.1'	noncoding_lncRNA_intergenic
2	238366670	238374291	-	CATG00000052047	FANTOM5	'CATG00000052047.1'	noncoding_lncRNA_intergenic
2	238382404	238476107	+	ENSG00000115648	FANTOM5	'MLPH'	protein_coding
2	238382404	238476107	+	ENSG00000115648	FANTOM5	'MLPH'	protein_coding
2	238382404	238476107	+	ENSG00000115648	FANTOM5	'MLPH'	protein_coding
2	238382404	238476107	+	ENSG00000115648	FANTOM5	'MLPH'	protein_coding
2	238384064	238385601	+	CATG00000047215	FANTOM5	'CATG00000047215.1'	noncoding_lncRNA_intergenic
2	238382404	238476107	+	ENSG00000115648	FANTOM5	'MLPH'	protein_coding
2	238382404	238476107	+	ENSG00000115648	FANTOM5	'MLPH'	protein_coding
2	238382404	238476107	+	ENSG00000115648	FANTOM5	'MLPH'	protein_coding
2	238382404	238476107	+	ENSG00000115648	FANTOM5	'MLPH'	protein_coding
2	238382404	238476107	+	ENSG00000115648	FANTOM5	'MLPH'	protein_coding
2	238382404	238476107	+	ENSG00000115648	FANTOM5	'MLPH'	protein_coding
2	238390471	238392091	-	CATG00000052050	FANTOM5	'CATG00000052050.1'	noncoding_lncRNA_divergent
2	238382404	238476107	+	ENSG00000115648	FANTOM5	'MLPH'	protein_coding
2	238382404	238476107	+	ENSG00000115648	FANTOM5	'MLPH'	protein_coding
2	238382404	238476107	+	ENSG00000115648	FANTOM5	'MLPH'	protein_coding
2	238382404	238476107	+	ENSG00000115648	FANTOM5	'MLPH'	protein_coding
2	238394497	238395791	-	CATG00000052051	FANTOM5	'CATG00000052051.1'	noncoding_lncRNA_divergent
2	238382404	238476107	+	ENSG00000115648	FANTOM5	'MLPH'	protein_coding
2	238394497	238395791	-	CATG00000052051	FANTOM5	'CATG00000052051.1'	noncoding_lncRNA_divergent
2	238382404	238476107	+	ENSG00000115648	FANTOM5	'MLPH'	protein_coding
2	238394497	238395791	-	CATG00000052051	FANTOM5	'CATG00000052051.1'	noncoding_lncRNA_divergent
2	238382404	238476107	+	ENSG00000115648	FANTOM5	'MLPH'	protein_coding
2	238394497	238395791	-	CATG00000052051	FANTOM5	'CATG00000052051.1'	noncoding_lncRNA_divergent
2	238382404	238476107	+	ENSG00000115648	FANTOM5	'MLPH'	protein_coding
2	238382404	238476107	+	ENSG00000115648	FANTOM5	'MLPH'	protein_coding
2	238382404	238476107	+	ENSG00000115648	FANTOM5	'MLPH'	protein_coding
2	238382404	238476107	+	ENSG00000115648	FANTOM5	'MLPH'	protein_coding
2	238382404	238476107	+	ENSG00000115648	FANTOM5	'MLPH'	protein_coding
2	238382404	238476107	+	ENSG00000115648	FANTOM5	'MLPH'	protein_coding
2	238382404	238476107	+	ENSG00000115648	FANTOM5	'MLPH'	protein_coding
2	238382404	238476107	+	ENSG00000115648	FANTOM5	'MLPH'	protein_coding
2	242161947	242256423	-	ENSG00000115677	FANTOM5	'HDLBP'	protein_coding
2	242161947	242256423	-	ENSG00000115677	FANTOM5	'HDLBP'	protein_coding
2	242161947	242256423	-	ENSG00000115677	FANTOM5	'HDLBP'	protein_coding
2	242161947	242256423	-	ENSG00000115677	FANTOM5	'HDLBP'	protein_coding
2	242161947	242256423	-	ENSG00000115677	FANTOM5	'HDLBP'	protein_coding
2	242161947	242256423	-	ENSG00000115677	FANTOM5	'HDLBP'	protein_coding
2	242161947	242256423	-	ENSG00000115677	FANTOM5	'HDLBP'	protein_coding
2	242161947	242256423	-	ENSG00000115677	FANTOM5	'HDLBP'	protein_coding
2	242161947	242256423	-	ENSG00000115677	FANTOM5	'HDLBP'	protein_coding
2	242161947	242256423	-	ENSG00000115677	FANTOM5	'HDLBP'	protein_coding
2	242161947	242256423	-	ENSG00000115677	FANTOM5	'HDLBP'	protein_coding
2	242161947	242256423	-	ENSG00000115677	FANTOM5	'HDLBP'	protein_coding
2	242161947	242256423	-	ENSG00000115677	FANTOM5	'HDLBP'	protein_coding
2	242161947	242256423	-	ENSG00000115677	FANTOM5	'HDLBP'	protein_coding
2	242161947	242256423	-	ENSG00000115677	FANTOM5	'HDLBP'	protein_coding
2	242161947	242256423	-	ENSG00000115677	FANTOM5	'HDLBP'	protein_coding
2	242161947	242256423	-	ENSG00000115677	FANTOM5	'HDLBP'	protein_coding
2	242161947	242256423	-	ENSG00000115677	FANTOM5	'HDLBP'	protein_coding
2	242161947	242256423	-	ENSG00000115677	FANTOM5	'HDLBP'	protein_coding
2	242161947	242256423	-	ENSG00000115677	FANTOM5	'HDLBP'	protein_coding
2	242161947	242256423	-	ENSG00000115677	FANTOM5	'HDLBP'	protein_coding
2	242161947	242256423	-	ENSG00000115677	FANTOM5	'HDLBP'	protein_coding
2	242161947	242256423	-	ENSG00000115677	FANTOM5	'HDLBP'	protein_coding
2	242161947	242256423	-	ENSG00000115677	FANTOM5	'HDLBP'	protein_coding
2	242161947	242256423	-	ENSG00000115677	FANTOM5	'HDLBP'	protein_coding
2	242161947	242256423	-	ENSG00000115677	FANTOM5	'HDLBP'	protein_coding
2	242161947	242256423	-	ENSG00000115677	FANTOM5	'HDLBP'	protein_coding
2	242161947	242256423	-	ENSG00000115677	FANTOM5	'HDLBP'	protein_coding
2	242161947	242256423	-	ENSG00000115677	FANTOM5	'HDLBP'	protein_coding
2	242254711	242294042	+	ENSG00000168385	FANTOM5	'SEPT2'	protein_coding
2	242254711	242294042	+	ENSG00000168385	FANTOM5	'SEPT2'	protein_coding
2	242254711	242294042	+	ENSG00000168385	FANTOM5	'SEPT2'	protein_coding
2	242254711	242294042	+	ENSG00000168385	FANTOM5	'SEPT2'	protein_coding
2	242254711	242294042	+	ENSG00000168385	FANTOM5	'SEPT2'	protein_coding
2	242254711	242294042	+	ENSG00000168385	FANTOM5	'SEPT2'	protein_coding
2	242254711	242294042	+	ENSG00000168385	FANTOM5	'SEPT2'	protein_coding
2	242254711	242294042	+	ENSG00000168385	FANTOM5	'SEPT2'	protein_coding
2	242254711	242294042	+	ENSG00000168385	FANTOM5	'SEPT2'	protein_coding
2	242254711	242294042	+	ENSG00000168385	FANTOM5	'SEPT2'	protein_coding
2	242254711	242294042	+	ENSG00000168385	FANTOM5	'SEPT2'	protein_coding
2	242254711	242294042	+	ENSG00000168385	FANTOM5	'SEPT2'	protein_coding
2	242254711	242294042	+	ENSG00000168385	FANTOM5	'SEPT2'	protein_coding
2	242254711	242294042	+	ENSG00000168385	FANTOM5	'SEPT2'	protein_coding
2	242254711	242294042	+	ENSG00000168385	FANTOM5	'SEPT2'	protein_coding
2	242254711	242294042	+	ENSG00000168385	FANTOM5	'SEPT2'	protein_coding
2	242254711	242294042	+	ENSG00000168385	FANTOM5	'SEPT2'	protein_coding
2	242254711	242294042	+	ENSG00000168385	FANTOM5	'SEPT2'	protein_coding
2	242254711	242294042	+	ENSG00000168385	FANTOM5	'SEPT2'	protein_coding
2	242254711	242294042	+	ENSG00000168385	FANTOM5	'SEPT2'	protein_coding
2	242254711	242294042	+	ENSG00000168385	FANTOM5	'SEPT2'	protein_coding
2	242254711	242294042	+	ENSG00000168385	FANTOM5	'SEPT2'	protein_coding
2	242254711	242294042	+	ENSG00000168385	FANTOM5	'SEPT2'	protein_coding
2	242254711	242294042	+	ENSG00000168385	FANTOM5	'SEPT2'	protein_coding
2	242290755	242292519	-	ENSG00000223374	Ensembl	'AC005104.3'	noncoding_antisense
2	242254711	242294042	+	ENSG00000168385	FANTOM5	'SEPT2'	protein_coding
2	242294261	242294817	-	CATG00000052161	FANTOM5	'CATG00000052161.1'	noncoding_lncRNA_divergent
2	242295700	242435107	+	ENSG00000006607	FANTOM5	'FARP2'	protein_coding
2	242295700	242435107	+	ENSG00000006607	FANTOM5	'FARP2'	protein_coding
2	242295700	242435107	+	ENSG00000006607	FANTOM5	'FARP2'	protein_coding
2	242295700	242435107	+	ENSG00000006607	FANTOM5	'FARP2'	protein_coding
2	242295700	242435107	+	ENSG00000006607	FANTOM5	'FARP2'	protein_coding
2	242295700	242435107	+	ENSG00000006607	FANTOM5	'FARP2'	protein_coding
2	242295700	242435107	+	ENSG00000006607	FANTOM5	'FARP2'	protein_coding
2	242295700	242435107	+	ENSG00000006607	FANTOM5	'FARP2'	protein_coding
2	242295700	242435107	+	ENSG00000006607	FANTOM5	'FARP2'	protein_coding
2	242317846	242320048	+	CATG00000047339	FANTOM5	'CATG00000047339.1'	noncoding_sense_overlap_RNA
2	242295700	242435107	+	ENSG00000006607	FANTOM5	'FARP2'	protein_coding
2	242295700	242435107	+	ENSG00000006607	FANTOM5	'FARP2'	protein_coding
2	242323504	242324379	+	CATG00000047340	FANTOM5	'CATG00000047340.1'	noncoding_sense_overlap_RNA
2	242295700	242435107	+	ENSG00000006607	FANTOM5	'FARP2'	protein_coding
2	242323504	242324379	+	CATG00000047340	FANTOM5	'CATG00000047340.1'	noncoding_sense_overlap_RNA
2	242295700	242435107	+	ENSG00000006607	FANTOM5	'FARP2'	protein_coding
2	242295700	242435107	+	ENSG00000006607	FANTOM5	'FARP2'	protein_coding
2	242295700	242435107	+	ENSG00000006607	FANTOM5	'FARP2'	protein_coding
2	242295700	242435107	+	ENSG00000006607	FANTOM5	'FARP2'	protein_coding
2	242295700	242435107	+	ENSG00000006607	FANTOM5	'FARP2'	protein_coding
2	242295700	242435107	+	ENSG00000006607	FANTOM5	'FARP2'	protein_coding
2	242295700	242435107	+	ENSG00000006607	FANTOM5	'FARP2'	protein_coding
2	242295700	242435107	+	ENSG00000006607	FANTOM5	'FARP2'	protein_coding
2	242295700	242435107	+	ENSG00000006607	FANTOM5	'FARP2'	protein_coding
2	242295700	242435107	+	ENSG00000006607	FANTOM5	'FARP2'	protein_coding
2	242295700	242435107	+	ENSG00000006607	FANTOM5	'FARP2'	protein_coding
2	242295700	242435107	+	ENSG00000006607	FANTOM5	'FARP2'	protein_coding
2	242295700	242435107	+	ENSG00000006607	FANTOM5	'FARP2'	protein_coding
2	242295700	242435107	+	ENSG00000006607	FANTOM5	'FARP2'	protein_coding
2	242295700	242435107	+	ENSG00000006607	FANTOM5	'FARP2'	protein_coding
2	242295700	242435107	+	ENSG00000006607	FANTOM5	'FARP2'	protein_coding
2	242295700	242435107	+	ENSG00000006607	FANTOM5	'FARP2'	protein_coding
2	242295700	242435107	+	ENSG00000006607	FANTOM5	'FARP2'	protein_coding
2	242295700	242435107	+	ENSG00000006607	FANTOM5	'FARP2'	protein_coding
2	242295700	242435107	+	ENSG00000006607	FANTOM5	'FARP2'	protein_coding
2	242295700	242435107	+	ENSG00000006607	FANTOM5	'FARP2'	protein_coding
2	242295700	242435107	+	ENSG00000006607	FANTOM5	'FARP2'	protein_coding
2	242295700	242435107	+	ENSG00000006607	FANTOM5	'FARP2'	protein_coding
2	242295700	242435107	+	ENSG00000006607	FANTOM5	'FARP2'	protein_coding
2	242295700	242435107	+	ENSG00000006607	FANTOM5	'FARP2'	protein_coding
2	242295700	242435107	+	ENSG00000006607	FANTOM5	'FARP2'	protein_coding
2	242295700	242435107	+	ENSG00000006607	FANTOM5	'FARP2'	protein_coding
2	242295700	242435107	+	ENSG00000006607	FANTOM5	'FARP2'	protein_coding
2	242295700	242435107	+	ENSG00000006607	FANTOM5	'FARP2'	protein_coding
2	242295700	242435107	+	ENSG00000006607	FANTOM5	'FARP2'	protein_coding
2	242295700	242435107	+	ENSG00000006607	FANTOM5	'FARP2'	protein_coding
2	242295700	242435107	+	ENSG00000006607	FANTOM5	'FARP2'	protein_coding
2	242295700	242435107	+	ENSG00000006607	FANTOM5	'FARP2'	protein_coding
2	242295700	242435107	+	ENSG00000006607	FANTOM5	'FARP2'	protein_coding
2	242295700	242435107	+	ENSG00000006607	FANTOM5	'FARP2'	protein_coding
2	242295700	242435107	+	ENSG00000006607	FANTOM5	'FARP2'	protein_coding
2	242295700	242435107	+	ENSG00000006607	FANTOM5	'FARP2'	protein_coding
2	242295700	242435107	+	ENSG00000006607	FANTOM5	'FARP2'	protein_coding
2	242295700	242435107	+	ENSG00000006607	FANTOM5	'FARP2'	protein_coding
2	242295700	242435107	+	ENSG00000006607	FANTOM5	'FARP2'	protein_coding
2	242417731	242418408	+	ENSG00000224232	Ensembl	'AC110299.5'	noncoding_pseudogene
2	242295700	242435107	+	ENSG00000006607	FANTOM5	'FARP2'	protein_coding
2	242295700	242435107	+	ENSG00000006607	FANTOM5	'FARP2'	protein_coding
2	242295700	242435107	+	ENSG00000006607	FANTOM5	'FARP2'	protein_coding
2	242295700	242435107	+	ENSG00000006607	FANTOM5	'FARP2'	protein_coding
2	242295700	242435107	+	ENSG00000006607	FANTOM5	'FARP2'	protein_coding
2	242429400	242448750	-	ENSG00000115694	FANTOM5	'STK25'	protein_coding
2	242295700	242435107	+	ENSG00000006607	FANTOM5	'FARP2'	protein_coding
2	242429400	242448750	-	ENSG00000115694	FANTOM5	'STK25'	protein_coding
2	242295700	242435107	+	ENSG00000006607	FANTOM5	'FARP2'	protein_coding
2	242429400	242448750	-	ENSG00000115694	FANTOM5	'STK25'	protein_coding
2	242295700	242435107	+	ENSG00000006607	FANTOM5	'FARP2'	protein_coding
2	242429400	242448750	-	ENSG00000115694	FANTOM5	'STK25'	protein_coding
2	242295700	242435107	+	ENSG00000006607	FANTOM5	'FARP2'	protein_coding
2	242429400	242448750	-	ENSG00000115694	FANTOM5	'STK25'	protein_coding
2	242295700	242435107	+	ENSG00000006607	FANTOM5	'FARP2'	protein_coding
2	242429400	242448750	-	ENSG00000115694	FANTOM5	'STK25'	protein_coding
2	242295700	242435107	+	ENSG00000006607	FANTOM5	'FARP2'	protein_coding
2	242429400	242448750	-	ENSG00000115694	FANTOM5	'STK25'	protein_coding
2	242429400	242448750	-	ENSG00000115694	FANTOM5	'STK25'	protein_coding
2	242429400	242448750	-	ENSG00000115694	FANTOM5	'STK25'	protein_coding
2	43393800	43823177	-	ENSG00000115970	FANTOM5	'THADA'	protein_coding
2	43393800	43823177	-	ENSG00000115970	FANTOM5	'THADA'	protein_coding
2	62523387	63273791	+	ENSG00000115504	FANTOM5	'EHBP1'	protein_coding
2	62523387	63273791	+	ENSG00000115504	FANTOM5	'EHBP1'	protein_coding
2	62523387	63273791	+	ENSG00000115504	FANTOM5	'EHBP1'	protein_coding
2	62523387	63273791	+	ENSG00000115504	FANTOM5	'EHBP1'	protein_coding
2	62523387	63273791	+	ENSG00000115504	FANTOM5	'EHBP1'	protein_coding
2	62523387	63273791	+	ENSG00000115504	FANTOM5	'EHBP1'	protein_coding
2	62523387	63273791	+	ENSG00000115504	FANTOM5	'EHBP1'	protein_coding
2	62523387	63273791	+	ENSG00000115504	FANTOM5	'EHBP1'	protein_coding
2	62523387	63273791	+	ENSG00000115504	FANTOM5	'EHBP1'	protein_coding
2	62523387	63273791	+	ENSG00000115504	FANTOM5	'EHBP1'	protein_coding
2	62523387	63273791	+	ENSG00000115504	FANTOM5	'EHBP1'	protein_coding
2	85759467	85759749	-	ENSG00000266577	Ensembl	'RN7SL830P'	noncoding_misc_RNA
2	85759467	85759749	-	ENSG00000266577	Ensembl	'RN7SL830P'	noncoding_misc_RNA
2	85761838	85788616	-	ENSG00000115486	FANTOM5	'GGCX'	protein_coding
2	85761838	85788616	-	ENSG00000115486	FANTOM5	'GGCX'	protein_coding
2	85761838	85788616	-	ENSG00000115486	FANTOM5	'GGCX'	protein_coding
2	85763516	85778246	+	ENSG00000168906	FANTOM5	'MAT2A'	protein_coding
2	85761838	85788616	-	ENSG00000115486	FANTOM5	'GGCX'	protein_coding
2	85763516	85778246	+	ENSG00000168906	FANTOM5	'MAT2A'	protein_coding
2	85761838	85788616	-	ENSG00000115486	FANTOM5	'GGCX'	protein_coding
2	85763516	85778246	+	ENSG00000168906	FANTOM5	'MAT2A'	protein_coding
2	85761838	85788616	-	ENSG00000115486	FANTOM5	'GGCX'	protein_coding
2	85763516	85778246	+	ENSG00000168906	FANTOM5	'MAT2A'	protein_coding
2	85761838	85788616	-	ENSG00000115486	FANTOM5	'GGCX'	protein_coding
2	85763516	85778246	+	ENSG00000168906	FANTOM5	'MAT2A'	protein_coding
2	85761838	85788616	-	ENSG00000115486	FANTOM5	'GGCX'	protein_coding
2	85763516	85778246	+	ENSG00000168906	FANTOM5	'MAT2A'	protein_coding
2	85761838	85788616	-	ENSG00000115486	FANTOM5	'GGCX'	protein_coding
2	85763516	85778246	+	ENSG00000168906	FANTOM5	'MAT2A'	protein_coding
2	85761838	85788616	-	ENSG00000115486	FANTOM5	'GGCX'	protein_coding
2	85763516	85778246	+	ENSG00000168906	FANTOM5	'MAT2A'	protein_coding
2	85761838	85788616	-	ENSG00000115486	FANTOM5	'GGCX'	protein_coding
2	85763516	85778246	+	ENSG00000168906	FANTOM5	'MAT2A'	protein_coding
2	85761838	85788616	-	ENSG00000115486	FANTOM5	'GGCX'	protein_coding
2	85763516	85778246	+	ENSG00000168906	FANTOM5	'MAT2A'	protein_coding
2	85761838	85788616	-	ENSG00000115486	FANTOM5	'GGCX'	protein_coding
2	85761838	85788616	-	ENSG00000115486	FANTOM5	'GGCX'	protein_coding
2	85761838	85788616	-	ENSG00000115486	FANTOM5	'GGCX'	protein_coding
2	85761838	85788616	-	ENSG00000115486	FANTOM5	'GGCX'	protein_coding
2	85761838	85788616	-	ENSG00000115486	FANTOM5	'GGCX'	protein_coding
2	85788540	85809154	+	ENSG00000118640	FANTOM5	'VAMP8'	protein_coding
2	85788540	85809154	+	ENSG00000118640	FANTOM5	'VAMP8'	protein_coding
2	85788540	85809154	+	ENSG00000118640	FANTOM5	'VAMP8'	protein_coding
2	85788540	85809154	+	ENSG00000118640	FANTOM5	'VAMP8'	protein_coding
2	85788540	85809154	+	ENSG00000118640	FANTOM5	'VAMP8'	protein_coding
2	85788540	85809154	+	ENSG00000118640	FANTOM5	'VAMP8'	protein_coding
2	85788540	85809154	+	ENSG00000118640	FANTOM5	'VAMP8'	protein_coding
2	85788540	85809154	+	ENSG00000118640	FANTOM5	'VAMP8'	protein_coding
2	85788540	85809154	+	ENSG00000118640	FANTOM5	'VAMP8'	protein_coding
2	85788540	85809154	+	ENSG00000118640	FANTOM5	'VAMP8'	protein_coding
2	85788540	85809154	+	ENSG00000118640	FANTOM5	'VAMP8'	protein_coding
2	85788540	85809154	+	ENSG00000118640	FANTOM5	'VAMP8'	protein_coding
2	85788540	85809154	+	ENSG00000118640	FANTOM5	'VAMP8'	protein_coding
2	85788540	85809154	+	ENSG00000118640	FANTOM5	'VAMP8'	protein_coding
2	85788540	85809154	+	ENSG00000118640	FANTOM5	'VAMP8'	protein_coding
2	85809403	85811437	-	CATG00000049225	FANTOM5	'CATG00000049225.1'	noncoding_lncRNA_divergent
2	85809403	85811437	-	CATG00000049225	FANTOM5	'CATG00000049225.1'	noncoding_lncRNA_divergent
3	87137728	87138852	-	CATG00000065281	FANTOM5	'CATG00000065281.1'	protein_coding
3	87138184	87207605	+	CATG00000060907	FANTOM5	'CATG00000060907.1'	noncoding_lncRNA_intergenic
3	87138184	87207605	+	CATG00000060907	FANTOM5	'CATG00000060907.1'	noncoding_lncRNA_intergenic
3	87138184	87207605	+	CATG00000060907	FANTOM5	'CATG00000060907.1'	noncoding_lncRNA_intergenic
3	87138184	87207605	+	CATG00000060907	FANTOM5	'CATG00000060907.1'	noncoding_lncRNA_intergenic
3	87138184	87207605	+	CATG00000060907	FANTOM5	'CATG00000060907.1'	noncoding_lncRNA_intergenic
3	87138184	87207605	+	CATG00000060907	FANTOM5	'CATG00000060907.1'	noncoding_lncRNA_intergenic
3	87138184	87207605	+	CATG00000060907	FANTOM5	'CATG00000060907.1'	noncoding_lncRNA_intergenic
3	87138184	87207605	+	CATG00000060907	FANTOM5	'CATG00000060907.1'	noncoding_lncRNA_intergenic
3	87138184	87207605	+	CATG00000060907	FANTOM5	'CATG00000060907.1'	noncoding_lncRNA_intergenic
3	87138184	87207605	+	CATG00000060907	FANTOM5	'CATG00000060907.1'	noncoding_lncRNA_intergenic
3	87138184	87207605	+	CATG00000060907	FANTOM5	'CATG00000060907.1'	noncoding_lncRNA_intergenic
3	87138184	87207605	+	CATG00000060907	FANTOM5	'CATG00000060907.1'	noncoding_lncRNA_intergenic
3	113250971	113380320	+	ENSG00000072858	FANTOM5	'SIDT1'	protein_coding
3	113250971	113380320	+	ENSG00000072858	FANTOM5	'SIDT1'	protein_coding
3	113250971	113380320	+	ENSG00000072858	FANTOM5	'SIDT1'	protein_coding
3	113250971	113380320	+	ENSG00000072858	FANTOM5	'SIDT1'	protein_coding
3	113250971	113380320	+	ENSG00000072858	FANTOM5	'SIDT1'	protein_coding
3	113250971	113380320	+	ENSG00000072858	FANTOM5	'SIDT1'	protein_coding
3	113250971	113380320	+	ENSG00000072858	FANTOM5	'SIDT1'	protein_coding
3	113250971	113380320	+	ENSG00000072858	FANTOM5	'SIDT1'	protein_coding
3	113250971	113380320	+	ENSG00000072858	FANTOM5	'SIDT1'	protein_coding
3	113250971	113380320	+	ENSG00000072858	FANTOM5	'SIDT1'	protein_coding
3	113250971	113380320	+	ENSG00000072858	FANTOM5	'SIDT1'	protein_coding
3	113250971	113380320	+	ENSG00000072858	FANTOM5	'SIDT1'	protein_coding
3	113250971	113380320	+	ENSG00000072858	FANTOM5	'SIDT1'	protein_coding
3	113303623	113309902	-	ENSG00000239453	FANTOM5	'SIDT1-AS1'	noncoding_lncRNA_noncoding_antisense
3	113250971	113380320	+	ENSG00000072858	FANTOM5	'SIDT1'	protein_coding
3	113303623	113309902	-	ENSG00000239453	FANTOM5	'SIDT1-AS1'	noncoding_lncRNA_noncoding_antisense
3	113250971	113380320	+	ENSG00000072858	FANTOM5	'SIDT1'	protein_coding
3	127778399	127872757	-	ENSG00000175792	FANTOM5	'RUVBL1'	protein_coding
3	127778399	127872757	-	ENSG00000175792	FANTOM5	'RUVBL1'	protein_coding
3	127778399	127872757	-	ENSG00000175792	FANTOM5	'RUVBL1'	protein_coding
3	127778399	127872757	-	ENSG00000175792	FANTOM5	'RUVBL1'	protein_coding
3	127778399	127872757	-	ENSG00000175792	FANTOM5	'RUVBL1'	protein_coding
3	127778399	127872757	-	ENSG00000175792	FANTOM5	'RUVBL1'	protein_coding
3	127778399	127872757	-	ENSG00000175792	FANTOM5	'RUVBL1'	protein_coding
3	127778399	127872757	-	ENSG00000175792	FANTOM5	'RUVBL1'	protein_coding
3	127860593	127871685	-	CATG00000066038	FANTOM5	'CATG00000066038.1'	protein_coding
3	127778399	127872757	-	ENSG00000175792	FANTOM5	'RUVBL1'	protein_coding
3	127860593	127871685	-	CATG00000066038	FANTOM5	'CATG00000066038.1'	protein_coding
3	127778399	127872757	-	ENSG00000175792	FANTOM5	'RUVBL1'	protein_coding
3	127860593	127871685	-	CATG00000066038	FANTOM5	'CATG00000066038.1'	protein_coding
3	127778399	127872757	-	ENSG00000175792	FANTOM5	'RUVBL1'	protein_coding
3	127860593	127871685	-	CATG00000066038	FANTOM5	'CATG00000066038.1'	protein_coding
3	127778399	127872757	-	ENSG00000175792	FANTOM5	'RUVBL1'	protein_coding
3	127860593	127871685	-	CATG00000066038	FANTOM5	'CATG00000066038.1'	protein_coding
3	127778399	127872757	-	ENSG00000175792	FANTOM5	'RUVBL1'	protein_coding
3	127860593	127871685	-	CATG00000066038	FANTOM5	'CATG00000066038.1'	protein_coding
3	127778399	127872757	-	ENSG00000175792	FANTOM5	'RUVBL1'	protein_coding
3	127872174	128161996	+	ENSG00000132394	FANTOM5	'EEFSEC'	protein_coding
3	127872174	128161996	+	ENSG00000132394	FANTOM5	'EEFSEC'	protein_coding
3	127872174	128161996	+	ENSG00000132394	FANTOM5	'EEFSEC'	protein_coding
3	127872174	128161996	+	ENSG00000132394	FANTOM5	'EEFSEC'	protein_coding
3	127872174	128161996	+	ENSG00000132394	FANTOM5	'EEFSEC'	protein_coding
3	127872174	128161996	+	ENSG00000132394	FANTOM5	'EEFSEC'	protein_coding
3	127872174	128161996	+	ENSG00000132394	FANTOM5	'EEFSEC'	protein_coding
3	127872174	128161996	+	ENSG00000132394	FANTOM5	'EEFSEC'	protein_coding
3	127872174	128161996	+	ENSG00000132394	FANTOM5	'EEFSEC'	protein_coding
3	127872174	128161996	+	ENSG00000132394	FANTOM5	'EEFSEC'	protein_coding
3	127872174	128161996	+	ENSG00000132394	FANTOM5	'EEFSEC'	protein_coding
3	127872174	128161996	+	ENSG00000132394	FANTOM5	'EEFSEC'	protein_coding
3	127872174	128161996	+	ENSG00000132394	FANTOM5	'EEFSEC'	protein_coding
3	127872174	128161996	+	ENSG00000132394	FANTOM5	'EEFSEC'	protein_coding
3	127872174	128161996	+	ENSG00000132394	FANTOM5	'EEFSEC'	protein_coding
3	127872174	128161996	+	ENSG00000132394	FANTOM5	'EEFSEC'	protein_coding
3	127872174	128161996	+	ENSG00000132394	FANTOM5	'EEFSEC'	protein_coding
3	127872174	128161996	+	ENSG00000132394	FANTOM5	'EEFSEC'	protein_coding
3	127872174	128161996	+	ENSG00000132394	FANTOM5	'EEFSEC'	protein_coding
3	127872174	128161996	+	ENSG00000132394	FANTOM5	'EEFSEC'	protein_coding
3	127872174	128161996	+	ENSG00000132394	FANTOM5	'EEFSEC'	protein_coding
3	127872174	128161996	+	ENSG00000132394	FANTOM5	'EEFSEC'	protein_coding
3	127872174	128161996	+	ENSG00000132394	FANTOM5	'EEFSEC'	protein_coding
3	127872174	128161996	+	ENSG00000132394	FANTOM5	'EEFSEC'	protein_coding
3	127872174	128161996	+	ENSG00000132394	FANTOM5	'EEFSEC'	protein_coding
3	127872174	128161996	+	ENSG00000132394	FANTOM5	'EEFSEC'	protein_coding
3	127872174	128161996	+	ENSG00000132394	FANTOM5	'EEFSEC'	protein_coding
3	127872174	128161996	+	ENSG00000132394	FANTOM5	'EEFSEC'	protein_coding
3	127872174	128161996	+	ENSG00000132394	FANTOM5	'EEFSEC'	protein_coding
3	127872174	128161996	+	ENSG00000132394	FANTOM5	'EEFSEC'	protein_coding
3	127872174	128161996	+	ENSG00000132394	FANTOM5	'EEFSEC'	protein_coding
3	127872174	128161996	+	ENSG00000132394	FANTOM5	'EEFSEC'	protein_coding
3	127872174	128161996	+	ENSG00000132394	FANTOM5	'EEFSEC'	protein_coding
3	127872174	128161996	+	ENSG00000132394	FANTOM5	'EEFSEC'	protein_coding
3	127872174	128161996	+	ENSG00000132394	FANTOM5	'EEFSEC'	protein_coding
3	127872174	128161996	+	ENSG00000132394	FANTOM5	'EEFSEC'	protein_coding
3	127872174	128161996	+	ENSG00000132394	FANTOM5	'EEFSEC'	protein_coding
3	127872174	128161996	+	ENSG00000132394	FANTOM5	'EEFSEC'	protein_coding
3	127872174	128161996	+	ENSG00000132394	FANTOM5	'EEFSEC'	protein_coding
3	127872174	128161996	+	ENSG00000132394	FANTOM5	'EEFSEC'	protein_coding
3	127872174	128161996	+	ENSG00000132394	FANTOM5	'EEFSEC'	protein_coding
3	127872174	128161996	+	ENSG00000132394	FANTOM5	'EEFSEC'	protein_coding
3	127872174	128161996	+	ENSG00000132394	FANTOM5	'EEFSEC'	protein_coding
3	127872174	128161996	+	ENSG00000132394	FANTOM5	'EEFSEC'	protein_coding
3	127872174	128161996	+	ENSG00000132394	FANTOM5	'EEFSEC'	protein_coding
3	127872174	128161996	+	ENSG00000132394	FANTOM5	'EEFSEC'	protein_coding
3	127872174	128161996	+	ENSG00000132394	FANTOM5	'EEFSEC'	protein_coding
3	127872174	128161996	+	ENSG00000132394	FANTOM5	'EEFSEC'	protein_coding
3	127872174	128161996	+	ENSG00000132394	FANTOM5	'EEFSEC'	protein_coding
3	127872174	128161996	+	ENSG00000132394	FANTOM5	'EEFSEC'	protein_coding
3	127872174	128161996	+	ENSG00000132394	FANTOM5	'EEFSEC'	protein_coding
3	127872174	128161996	+	ENSG00000132394	FANTOM5	'EEFSEC'	protein_coding
3	127872174	128161996	+	ENSG00000132394	FANTOM5	'EEFSEC'	protein_coding
3	127872174	128161996	+	ENSG00000132394	FANTOM5	'EEFSEC'	protein_coding
3	127872174	128161996	+	ENSG00000132394	FANTOM5	'EEFSEC'	protein_coding
3	127872174	128161996	+	ENSG00000132394	FANTOM5	'EEFSEC'	protein_coding
3	127872174	128161996	+	ENSG00000132394	FANTOM5	'EEFSEC'	protein_coding
3	127872174	128161996	+	ENSG00000132394	FANTOM5	'EEFSEC'	protein_coding
3	127872174	128161996	+	ENSG00000132394	FANTOM5	'EEFSEC'	protein_coding
3	127872174	128161996	+	ENSG00000132394	FANTOM5	'EEFSEC'	protein_coding
3	127872174	128161996	+	ENSG00000132394	FANTOM5	'EEFSEC'	protein_coding
3	127872174	128161996	+	ENSG00000132394	FANTOM5	'EEFSEC'	protein_coding
3	127872174	128161996	+	ENSG00000132394	FANTOM5	'EEFSEC'	protein_coding
3	127872174	128161996	+	ENSG00000132394	FANTOM5	'EEFSEC'	protein_coding
3	127872174	128161996	+	ENSG00000132394	FANTOM5	'EEFSEC'	protein_coding
3	127872174	128161996	+	ENSG00000132394	FANTOM5	'EEFSEC'	protein_coding
3	127872174	128161996	+	ENSG00000132394	FANTOM5	'EEFSEC'	protein_coding
3	127872174	128161996	+	ENSG00000132394	FANTOM5	'EEFSEC'	protein_coding
3	127872174	128161996	+	ENSG00000132394	FANTOM5	'EEFSEC'	protein_coding
3	127872174	128161996	+	ENSG00000132394	FANTOM5	'EEFSEC'	protein_coding
3	127872174	128161996	+	ENSG00000132394	FANTOM5	'EEFSEC'	protein_coding
3	127872174	128161996	+	ENSG00000132394	FANTOM5	'EEFSEC'	protein_coding
3	127872174	128161996	+	ENSG00000132394	FANTOM5	'EEFSEC'	protein_coding
3	127872174	128161996	+	ENSG00000132394	FANTOM5	'EEFSEC'	protein_coding
3	141030709	141173279	+	ENSG00000177311	FANTOM5	'ZBTB38'	protein_coding
3	141030709	141173279	+	ENSG00000177311	FANTOM5	'ZBTB38'	protein_coding
3	141030709	141173279	+	ENSG00000177311	FANTOM5	'ZBTB38'	protein_coding
3	141030709	141173279	+	ENSG00000177311	FANTOM5	'ZBTB38'	protein_coding
3	141030709	141173279	+	ENSG00000177311	FANTOM5	'ZBTB38'	protein_coding
3	141030709	141173279	+	ENSG00000177311	FANTOM5	'ZBTB38'	protein_coding
3	141103881	141105601	-	CATG00000066314	FANTOM5	'CATG00000066314.1'	noncoding_lncRNA_divergent
3	141030709	141173279	+	ENSG00000177311	FANTOM5	'ZBTB38'	protein_coding
3	141030709	141173279	+	ENSG00000177311	FANTOM5	'ZBTB38'	protein_coding
3	141030709	141173279	+	ENSG00000177311	FANTOM5	'ZBTB38'	protein_coding
3	141030709	141173279	+	ENSG00000177311	FANTOM5	'ZBTB38'	protein_coding
3	141030709	141173279	+	ENSG00000177311	FANTOM5	'ZBTB38'	protein_coding
3	141030709	141173279	+	ENSG00000177311	FANTOM5	'ZBTB38'	protein_coding
3	141030709	141173279	+	ENSG00000177311	FANTOM5	'ZBTB38'	protein_coding
3	141030709	141173279	+	ENSG00000177311	FANTOM5	'ZBTB38'	protein_coding
3	141030709	141173279	+	ENSG00000177311	FANTOM5	'ZBTB38'	protein_coding
3	141030709	141173279	+	ENSG00000177311	FANTOM5	'ZBTB38'	protein_coding
3	141030709	141173279	+	ENSG00000177311	FANTOM5	'ZBTB38'	protein_coding
3	141030709	141173279	+	ENSG00000177311	FANTOM5	'ZBTB38'	protein_coding
3	141030709	141173279	+	ENSG00000177311	FANTOM5	'ZBTB38'	protein_coding
3	141030709	141173279	+	ENSG00000177311	FANTOM5	'ZBTB38'	protein_coding
3	141030709	141173279	+	ENSG00000177311	FANTOM5	'ZBTB38'	protein_coding
3	141030709	141173279	+	ENSG00000177311	FANTOM5	'ZBTB38'	protein_coding
3	141030709	141173279	+	ENSG00000177311	FANTOM5	'ZBTB38'	protein_coding
3	141030709	141173279	+	ENSG00000177311	FANTOM5	'ZBTB38'	protein_coding
3	141030709	141173279	+	ENSG00000177311	FANTOM5	'ZBTB38'	protein_coding
3	170074283	170130642	+	ENSG00000136603	FANTOM5	'SKIL'	protein_coding
3	170074283	170130642	+	ENSG00000136603	FANTOM5	'SKIL'	protein_coding
3	170074283	170130642	+	ENSG00000136603	FANTOM5	'SKIL'	protein_coding
3	170074283	170130642	+	ENSG00000136603	FANTOM5	'SKIL'	protein_coding
3	170128300	170136403	+	ENSG00000242578	Ensembl	'RP11-469J4.3'	noncoding_lncRNA_lincRNA
4	106058428	106068586	-	CATG00000073317	FANTOM5	'CATG00000073317.1'	protein_coding
4	106058437	106061776	-	ENSG00000251259	Ensembl	'AC004069.2'	noncoding_lncRNA_lincRNA
4	106058428	106068586	-	CATG00000073317	FANTOM5	'CATG00000073317.1'	protein_coding
4	106058428	106068586	-	CATG00000073317	FANTOM5	'CATG00000073317.1'	protein_coding
4	106066736	106205165	+	ENSG00000168769	FANTOM5	'TET2'	protein_coding
4	106089354	106274105	-	ENSG00000251586	FANTOM5	'TET2-AS1'	noncoding_lncRNA_noncoding_antisense
4	106066736	106205165	+	ENSG00000168769	FANTOM5	'TET2'	protein_coding
4	106089354	106274105	-	ENSG00000251586	FANTOM5	'TET2-AS1'	noncoding_lncRNA_noncoding_antisense
4	106066736	106205165	+	ENSG00000168769	FANTOM5	'TET2'	protein_coding
4	106089354	106274105	-	ENSG00000251586	FANTOM5	'TET2-AS1'	noncoding_lncRNA_noncoding_antisense
4	106066736	106205165	+	ENSG00000168769	FANTOM5	'TET2'	protein_coding
4	106089354	106274105	-	ENSG00000251586	FANTOM5	'TET2-AS1'	noncoding_lncRNA_noncoding_antisense
4	106066736	106205165	+	ENSG00000168769	FANTOM5	'TET2'	protein_coding
4	106089354	106274105	-	ENSG00000251586	FANTOM5	'TET2-AS1'	noncoding_lncRNA_noncoding_antisense
4	106066736	106205165	+	ENSG00000168769	FANTOM5	'TET2'	protein_coding
4	106089354	106274105	-	ENSG00000251586	FANTOM5	'TET2-AS1'	noncoding_lncRNA_noncoding_antisense
4	74347462	74370237	+	ENSG00000079557	FANTOM5	'AFM'	protein_coding
4	95373093	95622964	+	ENSG00000163110	FANTOM5	'PDLIM5'	protein_coding
4	95373093	95622964	+	ENSG00000163110	FANTOM5	'PDLIM5'	protein_coding
4	95373093	95622964	+	ENSG00000163110	FANTOM5	'PDLIM5'	protein_coding
4	95373093	95622964	+	ENSG00000163110	FANTOM5	'PDLIM5'	protein_coding
4	95373093	95622964	+	ENSG00000163110	FANTOM5	'PDLIM5'	protein_coding
4	95373093	95622964	+	ENSG00000163110	FANTOM5	'PDLIM5'	protein_coding
4	95373093	95622964	+	ENSG00000163110	FANTOM5	'PDLIM5'	protein_coding
4	95373093	95622964	+	ENSG00000163110	FANTOM5	'PDLIM5'	protein_coding
4	95373093	95622964	+	ENSG00000163110	FANTOM5	'PDLIM5'	protein_coding
4	95373093	95622964	+	ENSG00000163110	FANTOM5	'PDLIM5'	protein_coding
4	95373093	95622964	+	ENSG00000163110	FANTOM5	'PDLIM5'	protein_coding
4	95373093	95622964	+	ENSG00000163110	FANTOM5	'PDLIM5'	protein_coding
4	95373093	95622964	+	ENSG00000163110	FANTOM5	'PDLIM5'	protein_coding
4	95373093	95622964	+	ENSG00000163110	FANTOM5	'PDLIM5'	protein_coding
4	95373093	95622964	+	ENSG00000163110	FANTOM5	'PDLIM5'	protein_coding
4	95373093	95622964	+	ENSG00000163110	FANTOM5	'PDLIM5'	protein_coding
4	95373093	95622964	+	ENSG00000163110	FANTOM5	'PDLIM5'	protein_coding
4	95373093	95622964	+	ENSG00000163110	FANTOM5	'PDLIM5'	protein_coding
4	95373093	95622964	+	ENSG00000163110	FANTOM5	'PDLIM5'	protein_coding
4	95373093	95622964	+	ENSG00000163110	FANTOM5	'PDLIM5'	protein_coding
4	95373093	95622964	+	ENSG00000163110	FANTOM5	'PDLIM5'	protein_coding
4	95373093	95622964	+	ENSG00000163110	FANTOM5	'PDLIM5'	protein_coding
4	95373093	95622964	+	ENSG00000163110	FANTOM5	'PDLIM5'	protein_coding
4	95373093	95622964	+	ENSG00000163110	FANTOM5	'PDLIM5'	protein_coding
4	95373093	95622964	+	ENSG00000163110	FANTOM5	'PDLIM5'	protein_coding
4	95373093	95622964	+	ENSG00000163110	FANTOM5	'PDLIM5'	protein_coding
4	95373093	95622964	+	ENSG00000163110	FANTOM5	'PDLIM5'	protein_coding
4	95373093	95622964	+	ENSG00000163110	FANTOM5	'PDLIM5'	protein_coding
4	95373093	95622964	+	ENSG00000163110	FANTOM5	'PDLIM5'	protein_coding
4	95373093	95622964	+	ENSG00000163110	FANTOM5	'PDLIM5'	protein_coding
4	95373093	95622964	+	ENSG00000163110	FANTOM5	'PDLIM5'	protein_coding
4	95373093	95622964	+	ENSG00000163110	FANTOM5	'PDLIM5'	protein_coding
4	95373093	95622964	+	ENSG00000163110	FANTOM5	'PDLIM5'	protein_coding
5	1887446	1900607	+	ENSG00000249326	Ensembl	'CTD-2194D22.4'	noncoding_antisense
5	1887446	1900607	+	ENSG00000249326	Ensembl	'CTD-2194D22.4'	noncoding_antisense
5	1887446	1900607	+	ENSG00000249326	Ensembl	'CTD-2194D22.4'	noncoding_antisense
5	1887446	1900607	+	ENSG00000249326	Ensembl	'CTD-2194D22.4'	noncoding_antisense
5	1887446	1900607	+	ENSG00000249326	Ensembl	'CTD-2194D22.4'	noncoding_antisense
5	1887446	1900607	+	ENSG00000249326	Ensembl	'CTD-2194D22.4'	noncoding_antisense
5	1887446	1900607	+	ENSG00000249326	Ensembl	'CTD-2194D22.4'	noncoding_antisense
5	1887446	1900607	+	ENSG00000249326	Ensembl	'CTD-2194D22.4'	noncoding_antisense
5	1887446	1900607	+	ENSG00000249326	Ensembl	'CTD-2194D22.4'	noncoding_antisense
5	1887446	1900607	+	ENSG00000249326	Ensembl	'CTD-2194D22.4'	noncoding_antisense
5	1887446	1900607	+	ENSG00000249326	Ensembl	'CTD-2194D22.4'	noncoding_antisense
5	1887446	1900607	+	ENSG00000249326	Ensembl	'CTD-2194D22.4'	noncoding_antisense
5	1887446	1900607	+	ENSG00000249326	Ensembl	'CTD-2194D22.4'	noncoding_antisense
5	1887446	1900607	+	ENSG00000249326	Ensembl	'CTD-2194D22.4'	noncoding_antisense
5	1253220	1295167	-	ENSG00000164362	FANTOM5	'TERT'	protein_coding
5	172901993	172951037	+	CATG00000078736	FANTOM5	'CATG00000078736.1'	noncoding_lncRNA_intergenic
5	172901993	172951037	+	CATG00000078736	FANTOM5	'CATG00000078736.1'	noncoding_lncRNA_intergenic
5	172901993	172951037	+	CATG00000078736	FANTOM5	'CATG00000078736.1'	noncoding_lncRNA_intergenic
5	172901993	172951037	+	CATG00000078736	FANTOM5	'CATG00000078736.1'	noncoding_lncRNA_intergenic
5	172901993	172951037	+	CATG00000078736	FANTOM5	'CATG00000078736.1'	noncoding_lncRNA_intergenic
5	172901993	172951037	+	CATG00000078736	FANTOM5	'CATG00000078736.1'	noncoding_lncRNA_intergenic
5	172901993	172951037	+	CATG00000078736	FANTOM5	'CATG00000078736.1'	noncoding_lncRNA_intergenic
5	44300360	44389800	-	ENSG00000070193	FANTOM5	'FGF10'	protein_coding
5	44300360	44389800	-	ENSG00000070193	FANTOM5	'FGF10'	protein_coding
5	44300360	44389800	-	ENSG00000070193	FANTOM5	'FGF10'	protein_coding
5	44300360	44389800	-	ENSG00000070193	FANTOM5	'FGF10'	protein_coding
5	44300360	44389800	-	ENSG00000070193	FANTOM5	'FGF10'	protein_coding
5	44300360	44389800	-	ENSG00000070193	FANTOM5	'FGF10'	protein_coding
5	44300360	44389800	-	ENSG00000070193	FANTOM5	'FGF10'	protein_coding
5	44300360	44389800	-	ENSG00000070193	FANTOM5	'FGF10'	protein_coding
5	44300360	44389800	-	ENSG00000070193	FANTOM5	'FGF10'	protein_coding
5	44300360	44389800	-	ENSG00000070193	FANTOM5	'FGF10'	protein_coding
5	44300360	44389800	-	ENSG00000070193	FANTOM5	'FGF10'	protein_coding
5	44300360	44389800	-	ENSG00000070193	FANTOM5	'FGF10'	protein_coding
5	44300360	44389800	-	ENSG00000070193	FANTOM5	'FGF10'	protein_coding
5	44300360	44389800	-	ENSG00000070193	FANTOM5	'FGF10'	protein_coding
5	44300360	44389800	-	ENSG00000070193	FANTOM5	'FGF10'	protein_coding
5	44300360	44389800	-	ENSG00000070193	FANTOM5	'FGF10'	protein_coding
5	44300360	44389800	-	ENSG00000070193	FANTOM5	'FGF10'	protein_coding
5	44300360	44389800	-	ENSG00000070193	FANTOM5	'FGF10'	protein_coding
5	44300360	44389800	-	ENSG00000070193	FANTOM5	'FGF10'	protein_coding
5	44300360	44389800	-	ENSG00000070193	FANTOM5	'FGF10'	protein_coding
5	44300360	44389800	-	ENSG00000070193	FANTOM5	'FGF10'	protein_coding
5	44300360	44389800	-	ENSG00000070193	FANTOM5	'FGF10'	protein_coding
5	44300360	44389800	-	ENSG00000070193	FANTOM5	'FGF10'	protein_coding
5	44300360	44389800	-	ENSG00000070193	FANTOM5	'FGF10'	protein_coding
5	44300360	44389800	-	ENSG00000070193	FANTOM5	'FGF10'	protein_coding
5	44300360	44389800	-	ENSG00000070193	FANTOM5	'FGF10'	protein_coding
5	44300360	44389800	-	ENSG00000070193	FANTOM5	'FGF10'	protein_coding
5	44300360	44389800	-	ENSG00000070193	FANTOM5	'FGF10'	protein_coding
5	44300360	44389800	-	ENSG00000070193	FANTOM5	'FGF10'	protein_coding
5	44300360	44389800	-	ENSG00000070193	FANTOM5	'FGF10'	protein_coding
5	44300360	44389800	-	ENSG00000070193	FANTOM5	'FGF10'	protein_coding
5	44300360	44389800	-	ENSG00000070193	FANTOM5	'FGF10'	protein_coding
5	44300360	44389800	-	ENSG00000070193	FANTOM5	'FGF10'	protein_coding
5	44300360	44389800	-	ENSG00000070193	FANTOM5	'FGF10'	protein_coding
5	44300360	44389800	-	ENSG00000070193	FANTOM5	'FGF10'	protein_coding
5	44300360	44389800	-	ENSG00000070193	FANTOM5	'FGF10'	protein_coding
5	44300360	44389800	-	ENSG00000070193	FANTOM5	'FGF10'	protein_coding
5	44300360	44389800	-	ENSG00000070193	FANTOM5	'FGF10'	protein_coding
5	44300360	44389800	-	ENSG00000070193	FANTOM5	'FGF10'	protein_coding
5	44300360	44389800	-	ENSG00000070193	FANTOM5	'FGF10'	protein_coding
5	44300360	44389800	-	ENSG00000070193	FANTOM5	'FGF10'	protein_coding
5	44300360	44389800	-	ENSG00000070193	FANTOM5	'FGF10'	protein_coding
5	44300360	44389800	-	ENSG00000070193	FANTOM5	'FGF10'	protein_coding
5	44300360	44389800	-	ENSG00000070193	FANTOM5	'FGF10'	protein_coding
5	44300360	44389800	-	ENSG00000070193	FANTOM5	'FGF10'	protein_coding
5	44300360	44389800	-	ENSG00000070193	FANTOM5	'FGF10'	protein_coding
5	44300360	44389800	-	ENSG00000070193	FANTOM5	'FGF10'	protein_coding
5	44300360	44389800	-	ENSG00000070193	FANTOM5	'FGF10'	protein_coding
5	44300360	44389800	-	ENSG00000070193	FANTOM5	'FGF10'	protein_coding
5	44300360	44389800	-	ENSG00000070193	FANTOM5	'FGF10'	protein_coding
5	44300360	44389800	-	ENSG00000070193	FANTOM5	'FGF10'	protein_coding
5	44300360	44389800	-	ENSG00000070193	FANTOM5	'FGF10'	protein_coding
5	44300360	44389800	-	ENSG00000070193	FANTOM5	'FGF10'	protein_coding
5	44300360	44389800	-	ENSG00000070193	FANTOM5	'FGF10'	protein_coding
5	44300360	44389800	-	ENSG00000070193	FANTOM5	'FGF10'	protein_coding
5	44300360	44389800	-	ENSG00000070193	FANTOM5	'FGF10'	protein_coding
5	44300360	44389800	-	ENSG00000070193	FANTOM5	'FGF10'	protein_coding
5	44300360	44389800	-	ENSG00000070193	FANTOM5	'FGF10'	protein_coding
5	44300360	44389800	-	ENSG00000070193	FANTOM5	'FGF10'	protein_coding
5	44300360	44389800	-	ENSG00000070193	FANTOM5	'FGF10'	protein_coding
5	44300360	44389800	-	ENSG00000070193	FANTOM5	'FGF10'	protein_coding
5	44300360	44389800	-	ENSG00000070193	FANTOM5	'FGF10'	protein_coding
5	44300360	44389800	-	ENSG00000070193	FANTOM5	'FGF10'	protein_coding
5	44300360	44389800	-	ENSG00000070193	FANTOM5	'FGF10'	protein_coding
5	44300360	44389800	-	ENSG00000070193	FANTOM5	'FGF10'	protein_coding
5	44300360	44389800	-	ENSG00000070193	FANTOM5	'FGF10'	protein_coding
5	44300360	44389800	-	ENSG00000070193	FANTOM5	'FGF10'	protein_coding
5	44300360	44389800	-	ENSG00000070193	FANTOM5	'FGF10'	protein_coding
5	44300360	44389800	-	ENSG00000070193	FANTOM5	'FGF10'	protein_coding
5	44300360	44389800	-	ENSG00000070193	FANTOM5	'FGF10'	protein_coding
5	44300360	44389800	-	ENSG00000070193	FANTOM5	'FGF10'	protein_coding
5	44300360	44389800	-	ENSG00000070193	FANTOM5	'FGF10'	protein_coding
5	44388451	44434366	+	ENSG00000248464	FANTOM5	'RP11-473L15.2'	noncoding_lncRNA_divergent
6	117198414	117254919	+	ENSG00000185002	FANTOM5	'RFX6'	protein_coding
6	117198414	117254919	+	ENSG00000185002	FANTOM5	'RFX6'	protein_coding
6	117198414	117254919	+	ENSG00000185002	FANTOM5	'RFX6'	protein_coding
6	117198414	117254919	+	ENSG00000185002	FANTOM5	'RFX6'	protein_coding
6	117198414	117254919	+	ENSG00000185002	FANTOM5	'RFX6'	protein_coding
6	117198414	117254919	+	ENSG00000185002	FANTOM5	'RFX6'	protein_coding
6	117198414	117254919	+	ENSG00000185002	FANTOM5	'RFX6'	protein_coding
6	117198414	117254919	+	ENSG00000185002	FANTOM5	'RFX6'	protein_coding
6	117198414	117254919	+	ENSG00000185002	FANTOM5	'RFX6'	protein_coding
6	117198414	117254919	+	ENSG00000185002	FANTOM5	'RFX6'	protein_coding
6	117198414	117254919	+	ENSG00000185002	FANTOM5	'RFX6'	protein_coding
6	117198414	117254919	+	ENSG00000185002	FANTOM5	'RFX6'	protein_coding
6	117198414	117254919	+	ENSG00000185002	FANTOM5	'RFX6'	protein_coding
6	117198414	117254919	+	ENSG00000185002	FANTOM5	'RFX6'	protein_coding
6	117198414	117254919	+	ENSG00000185002	FANTOM5	'RFX6'	protein_coding
6	117198414	117254919	+	ENSG00000185002	FANTOM5	'RFX6'	protein_coding
6	117198414	117254919	+	ENSG00000185002	FANTOM5	'RFX6'	protein_coding
6	117198414	117254919	+	ENSG00000185002	FANTOM5	'RFX6'	protein_coding
6	117198414	117254919	+	ENSG00000185002	FANTOM5	'RFX6'	protein_coding
6	117198414	117254919	+	ENSG00000185002	FANTOM5	'RFX6'	protein_coding
6	117198414	117254919	+	ENSG00000185002	FANTOM5	'RFX6'	protein_coding
6	117198414	117254919	+	ENSG00000185002	FANTOM5	'RFX6'	protein_coding
6	117198414	117254919	+	ENSG00000185002	FANTOM5	'RFX6'	protein_coding
6	117198414	117254919	+	ENSG00000185002	FANTOM5	'RFX6'	protein_coding
6	117198414	117254919	+	ENSG00000185002	FANTOM5	'RFX6'	protein_coding
6	117198414	117254919	+	ENSG00000185002	FANTOM5	'RFX6'	protein_coding
6	117198414	117254919	+	ENSG00000185002	FANTOM5	'RFX6'	protein_coding
6	117198414	117254919	+	ENSG00000185002	FANTOM5	'RFX6'	protein_coding
6	117198414	117254919	+	ENSG00000185002	FANTOM5	'RFX6'	protein_coding
6	117198414	117254919	+	ENSG00000185002	FANTOM5	'RFX6'	protein_coding
6	117198414	117254919	+	ENSG00000185002	FANTOM5	'RFX6'	protein_coding
6	117198414	117254919	+	ENSG00000185002	FANTOM5	'RFX6'	protein_coding
6	117198414	117254919	+	ENSG00000185002	FANTOM5	'RFX6'	protein_coding
6	117198414	117254919	+	ENSG00000185002	FANTOM5	'RFX6'	protein_coding
6	117198414	117254919	+	ENSG00000185002	FANTOM5	'RFX6'	protein_coding
6	117198414	117254919	+	ENSG00000185002	FANTOM5	'RFX6'	protein_coding
6	117198414	117254919	+	ENSG00000185002	FANTOM5	'RFX6'	protein_coding
6	117198414	117254919	+	ENSG00000185002	FANTOM5	'RFX6'	protein_coding
6	117198414	117254919	+	ENSG00000185002	FANTOM5	'RFX6'	protein_coding
6	117198414	117254919	+	ENSG00000185002	FANTOM5	'RFX6'	protein_coding
6	109169625	109319681	+	ENSG00000118690	FANTOM5	'ARMC2'	protein_coding
6	109169625	109319681	+	ENSG00000118690	FANTOM5	'ARMC2'	protein_coding
6	109169625	109319681	+	ENSG00000118690	FANTOM5	'ARMC2'	protein_coding
6	109169625	109319681	+	ENSG00000118690	FANTOM5	'ARMC2'	protein_coding
6	109169625	109319681	+	ENSG00000118690	FANTOM5	'ARMC2'	protein_coding
6	109169625	109319681	+	ENSG00000118690	FANTOM5	'ARMC2'	protein_coding
6	109169625	109319681	+	ENSG00000118690	FANTOM5	'ARMC2'	protein_coding
6	109169625	109319681	+	ENSG00000118690	FANTOM5	'ARMC2'	protein_coding
6	109169625	109319681	+	ENSG00000118690	FANTOM5	'ARMC2'	protein_coding
6	109169625	109319681	+	ENSG00000118690	FANTOM5	'ARMC2'	protein_coding
6	109169625	109319681	+	ENSG00000118690	FANTOM5	'ARMC2'	protein_coding
6	109286200	109288396	-	CATG00000089573	FANTOM5	'CATG00000089573.1'	noncoding_lncRNA_noncoding_antisense
6	109169625	109319681	+	ENSG00000118690	FANTOM5	'ARMC2'	protein_coding
6	109286200	109288396	-	CATG00000089573	FANTOM5	'CATG00000089573.1'	noncoding_lncRNA_noncoding_antisense
6	109169625	109319681	+	ENSG00000118690	FANTOM5	'ARMC2'	protein_coding
6	109286200	109288396	-	CATG00000089573	FANTOM5	'CATG00000089573.1'	noncoding_lncRNA_noncoding_antisense
6	109169625	109319681	+	ENSG00000118690	FANTOM5	'ARMC2'	protein_coding
6	109288590	109289453	+	CATG00000085288	FANTOM5	'CATG00000085288.1'	noncoding_lncRNA_noncoding_sense_intronic
6	109169625	109319681	+	ENSG00000118690	FANTOM5	'ARMC2'	protein_coding
6	109169625	109319681	+	ENSG00000118690	FANTOM5	'ARMC2'	protein_coding
6	109169625	109319681	+	ENSG00000118690	FANTOM5	'ARMC2'	protein_coding
6	109169625	109319681	+	ENSG00000118690	FANTOM5	'ARMC2'	protein_coding
6	109169625	109319681	+	ENSG00000118690	FANTOM5	'ARMC2'	protein_coding
6	109169625	109319681	+	ENSG00000118690	FANTOM5	'ARMC2'	protein_coding
6	109169625	109319681	+	ENSG00000118690	FANTOM5	'ARMC2'	protein_coding
6	109169625	109319681	+	ENSG00000118690	FANTOM5	'ARMC2'	protein_coding
6	109169625	109319681	+	ENSG00000118690	FANTOM5	'ARMC2'	protein_coding
6	109169625	109319681	+	ENSG00000118690	FANTOM5	'ARMC2'	protein_coding
6	109169625	109319681	+	ENSG00000118690	FANTOM5	'ARMC2'	protein_coding
6	109169625	109319681	+	ENSG00000118690	FANTOM5	'ARMC2'	protein_coding
6	109169625	109319681	+	ENSG00000118690	FANTOM5	'ARMC2'	protein_coding
6	109169625	109319681	+	ENSG00000118690	FANTOM5	'ARMC2'	protein_coding
6	109169625	109319681	+	ENSG00000118690	FANTOM5	'ARMC2'	protein_coding
6	109169625	109319681	+	ENSG00000118690	FANTOM5	'ARMC2'	protein_coding
6	109169625	109319681	+	ENSG00000118690	FANTOM5	'ARMC2'	protein_coding
6	109169625	109319681	+	ENSG00000118690	FANTOM5	'ARMC2'	protein_coding
6	109169625	109319681	+	ENSG00000118690	FANTOM5	'ARMC2'	protein_coding
6	109169625	109319681	+	ENSG00000118690	FANTOM5	'ARMC2'	protein_coding
6	109169625	109319681	+	ENSG00000118690	FANTOM5	'ARMC2'	protein_coding
6	109169625	109319681	+	ENSG00000118690	FANTOM5	'ARMC2'	protein_coding
6	109169625	109319681	+	ENSG00000118690	FANTOM5	'ARMC2'	protein_coding
6	109169625	109319681	+	ENSG00000118690	FANTOM5	'ARMC2'	protein_coding
6	109169625	109319681	+	ENSG00000118690	FANTOM5	'ARMC2'	protein_coding
6	109169625	109319681	+	ENSG00000118690	FANTOM5	'ARMC2'	protein_coding
6	109169625	109319681	+	ENSG00000118690	FANTOM5	'ARMC2'	protein_coding
6	109169625	109319681	+	ENSG00000118690	FANTOM5	'ARMC2'	protein_coding
6	109169625	109319681	+	ENSG00000118690	FANTOM5	'ARMC2'	protein_coding
6	109169625	109319681	+	ENSG00000118690	FANTOM5	'ARMC2'	protein_coding
6	109169625	109319681	+	ENSG00000118690	FANTOM5	'ARMC2'	protein_coding
6	109169625	109319681	+	ENSG00000118690	FANTOM5	'ARMC2'	protein_coding
6	109169625	109319681	+	ENSG00000118690	FANTOM5	'ARMC2'	protein_coding
6	109169625	109319681	+	ENSG00000118690	FANTOM5	'ARMC2'	protein_coding
6	109169625	109319681	+	ENSG00000118690	FANTOM5	'ARMC2'	protein_coding
6	109169625	109319681	+	ENSG00000118690	FANTOM5	'ARMC2'	protein_coding
6	109169625	109319681	+	ENSG00000118690	FANTOM5	'ARMC2'	protein_coding
6	109169625	109319681	+	ENSG00000118690	FANTOM5	'ARMC2'	protein_coding
6	109169625	109319681	+	ENSG00000118690	FANTOM5	'ARMC2'	protein_coding
6	109169625	109319681	+	ENSG00000118690	FANTOM5	'ARMC2'	protein_coding
6	109169625	109319681	+	ENSG00000118690	FANTOM5	'ARMC2'	protein_coding
6	109169625	109319681	+	ENSG00000118690	FANTOM5	'ARMC2'	protein_coding
6	109169625	109319681	+	ENSG00000118690	FANTOM5	'ARMC2'	protein_coding
6	109169625	109319681	+	ENSG00000118690	FANTOM5	'ARMC2'	protein_coding
6	109169625	109319681	+	ENSG00000118690	FANTOM5	'ARMC2'	protein_coding
6	109169625	109319681	+	ENSG00000118690	FANTOM5	'ARMC2'	protein_coding
6	109169625	109319681	+	ENSG00000118690	FANTOM5	'ARMC2'	protein_coding
6	109169625	109319681	+	ENSG00000118690	FANTOM5	'ARMC2'	protein_coding
6	109301708	109416607	-	ENSG00000080546	FANTOM5	'SESN1'	protein_coding
6	109169625	109319681	+	ENSG00000118690	FANTOM5	'ARMC2'	protein_coding
6	109301708	109416607	-	ENSG00000080546	FANTOM5	'SESN1'	protein_coding
6	109302286	109302650	+	CATG00000085289	FANTOM5	'CATG00000085289.1'	noncoding_lncRNA_intergenic
6	109169625	109319681	+	ENSG00000118690	FANTOM5	'ARMC2'	protein_coding
6	109301708	109416607	-	ENSG00000080546	FANTOM5	'SESN1'	protein_coding
6	109169625	109319681	+	ENSG00000118690	FANTOM5	'ARMC2'	protein_coding
6	109301708	109416607	-	ENSG00000080546	FANTOM5	'SESN1'	protein_coding
6	109169625	109319681	+	ENSG00000118690	FANTOM5	'ARMC2'	protein_coding
6	109301708	109416607	-	ENSG00000080546	FANTOM5	'SESN1'	protein_coding
6	109169625	109319681	+	ENSG00000118690	FANTOM5	'ARMC2'	protein_coding
6	109301708	109416607	-	ENSG00000080546	FANTOM5	'SESN1'	protein_coding
6	109169625	109319681	+	ENSG00000118690	FANTOM5	'ARMC2'	protein_coding
6	109301708	109416607	-	ENSG00000080546	FANTOM5	'SESN1'	protein_coding
6	109169625	109319681	+	ENSG00000118690	FANTOM5	'ARMC2'	protein_coding
6	109301708	109416607	-	ENSG00000080546	FANTOM5	'SESN1'	protein_coding
6	109169625	109319681	+	ENSG00000118690	FANTOM5	'ARMC2'	protein_coding
6	109301708	109416607	-	ENSG00000080546	FANTOM5	'SESN1'	protein_coding
6	109169625	109319681	+	ENSG00000118690	FANTOM5	'ARMC2'	protein_coding
6	109301708	109416607	-	ENSG00000080546	FANTOM5	'SESN1'	protein_coding
6	109169625	109319681	+	ENSG00000118690	FANTOM5	'ARMC2'	protein_coding
6	109301708	109416607	-	ENSG00000080546	FANTOM5	'SESN1'	protein_coding
6	109169625	109319681	+	ENSG00000118690	FANTOM5	'ARMC2'	protein_coding
6	109301708	109416607	-	ENSG00000080546	FANTOM5	'SESN1'	protein_coding
6	109169625	109319681	+	ENSG00000118690	FANTOM5	'ARMC2'	protein_coding
6	109301708	109416607	-	ENSG00000080546	FANTOM5	'SESN1'	protein_coding
6	109169625	109319681	+	ENSG00000118690	FANTOM5	'ARMC2'	protein_coding
6	109301708	109416607	-	ENSG00000080546	FANTOM5	'SESN1'	protein_coding
6	109169625	109319681	+	ENSG00000118690	FANTOM5	'ARMC2'	protein_coding
6	109301708	109416607	-	ENSG00000080546	FANTOM5	'SESN1'	protein_coding
6	109169625	109319681	+	ENSG00000118690	FANTOM5	'ARMC2'	protein_coding
6	109301708	109416607	-	ENSG00000080546	FANTOM5	'SESN1'	protein_coding
6	109169625	109319681	+	ENSG00000118690	FANTOM5	'ARMC2'	protein_coding
6	109301708	109416607	-	ENSG00000080546	FANTOM5	'SESN1'	protein_coding
6	109169625	109319681	+	ENSG00000118690	FANTOM5	'ARMC2'	protein_coding
6	109301708	109416607	-	ENSG00000080546	FANTOM5	'SESN1'	protein_coding
6	109169625	109319681	+	ENSG00000118690	FANTOM5	'ARMC2'	protein_coding
6	109301708	109416607	-	ENSG00000080546	FANTOM5	'SESN1'	protein_coding
6	109169625	109319681	+	ENSG00000118690	FANTOM5	'ARMC2'	protein_coding
6	109301708	109416607	-	ENSG00000080546	FANTOM5	'SESN1'	protein_coding
6	109169625	109319681	+	ENSG00000118690	FANTOM5	'ARMC2'	protein_coding
6	109301708	109416607	-	ENSG00000080546	FANTOM5	'SESN1'	protein_coding
6	109169625	109319681	+	ENSG00000118690	FANTOM5	'ARMC2'	protein_coding
6	109301708	109416607	-	ENSG00000080546	FANTOM5	'SESN1'	protein_coding
6	109169625	109319681	+	ENSG00000118690	FANTOM5	'ARMC2'	protein_coding
6	109301708	109416607	-	ENSG00000080546	FANTOM5	'SESN1'	protein_coding
6	109169625	109319681	+	ENSG00000118690	FANTOM5	'ARMC2'	protein_coding
6	109301708	109416607	-	ENSG00000080546	FANTOM5	'SESN1'	protein_coding
6	109169625	109319681	+	ENSG00000118690	FANTOM5	'ARMC2'	protein_coding
6	109301708	109416607	-	ENSG00000080546	FANTOM5	'SESN1'	protein_coding
6	109169625	109319681	+	ENSG00000118690	FANTOM5	'ARMC2'	protein_coding
6	109301708	109416607	-	ENSG00000080546	FANTOM5	'SESN1'	protein_coding
6	109169625	109319681	+	ENSG00000118690	FANTOM5	'ARMC2'	protein_coding
6	109301708	109416607	-	ENSG00000080546	FANTOM5	'SESN1'	protein_coding
6	109169625	109319681	+	ENSG00000118690	FANTOM5	'ARMC2'	protein_coding
6	109301708	109416607	-	ENSG00000080546	FANTOM5	'SESN1'	protein_coding
6	109169625	109319681	+	ENSG00000118690	FANTOM5	'ARMC2'	protein_coding
6	109301708	109416607	-	ENSG00000080546	FANTOM5	'SESN1'	protein_coding
6	109169625	109319681	+	ENSG00000118690	FANTOM5	'ARMC2'	protein_coding
6	109301708	109416607	-	ENSG00000080546	FANTOM5	'SESN1'	protein_coding
6	109169625	109319681	+	ENSG00000118690	FANTOM5	'ARMC2'	protein_coding
6	109301708	109416607	-	ENSG00000080546	FANTOM5	'SESN1'	protein_coding
6	109169625	109319681	+	ENSG00000118690	FANTOM5	'ARMC2'	protein_coding
6	109301708	109416607	-	ENSG00000080546	FANTOM5	'SESN1'	protein_coding
6	109169625	109319681	+	ENSG00000118690	FANTOM5	'ARMC2'	protein_coding
6	109301708	109416607	-	ENSG00000080546	FANTOM5	'SESN1'	protein_coding
6	109169625	109319681	+	ENSG00000118690	FANTOM5	'ARMC2'	protein_coding
6	109301708	109416607	-	ENSG00000080546	FANTOM5	'SESN1'	protein_coding
6	109169625	109319681	+	ENSG00000118690	FANTOM5	'ARMC2'	protein_coding
6	109301708	109416607	-	ENSG00000080546	FANTOM5	'SESN1'	protein_coding
6	109169625	109319681	+	ENSG00000118690	FANTOM5	'ARMC2'	protein_coding
6	109301708	109416607	-	ENSG00000080546	FANTOM5	'SESN1'	protein_coding
6	109169625	109319681	+	ENSG00000118690	FANTOM5	'ARMC2'	protein_coding
6	109301708	109416607	-	ENSG00000080546	FANTOM5	'SESN1'	protein_coding
6	109169625	109319681	+	ENSG00000118690	FANTOM5	'ARMC2'	protein_coding
6	109301708	109416607	-	ENSG00000080546	FANTOM5	'SESN1'	protein_coding
6	109169625	109319681	+	ENSG00000118690	FANTOM5	'ARMC2'	protein_coding
6	109301708	109416607	-	ENSG00000080546	FANTOM5	'SESN1'	protein_coding
6	109169625	109319681	+	ENSG00000118690	FANTOM5	'ARMC2'	protein_coding
6	109301708	109416607	-	ENSG00000080546	FANTOM5	'SESN1'	protein_coding
6	109169625	109319681	+	ENSG00000118690	FANTOM5	'ARMC2'	protein_coding
6	109301708	109416607	-	ENSG00000080546	FANTOM5	'SESN1'	protein_coding
6	109169625	109319681	+	ENSG00000118690	FANTOM5	'ARMC2'	protein_coding
6	109301708	109416607	-	ENSG00000080546	FANTOM5	'SESN1'	protein_coding
6	109169625	109319681	+	ENSG00000118690	FANTOM5	'ARMC2'	protein_coding
6	109301708	109416607	-	ENSG00000080546	FANTOM5	'SESN1'	protein_coding
6	109169625	109319681	+	ENSG00000118690	FANTOM5	'ARMC2'	protein_coding
6	109301708	109416607	-	ENSG00000080546	FANTOM5	'SESN1'	protein_coding
6	109169625	109319681	+	ENSG00000118690	FANTOM5	'ARMC2'	protein_coding
6	109301708	109416607	-	ENSG00000080546	FANTOM5	'SESN1'	protein_coding
6	109169625	109319681	+	ENSG00000118690	FANTOM5	'ARMC2'	protein_coding
6	109301708	109416607	-	ENSG00000080546	FANTOM5	'SESN1'	protein_coding
6	109169625	109319681	+	ENSG00000118690	FANTOM5	'ARMC2'	protein_coding
6	109301708	109416607	-	ENSG00000080546	FANTOM5	'SESN1'	protein_coding
6	109169625	109319681	+	ENSG00000118690	FANTOM5	'ARMC2'	protein_coding
6	109301708	109416607	-	ENSG00000080546	FANTOM5	'SESN1'	protein_coding
6	109169625	109319681	+	ENSG00000118690	FANTOM5	'ARMC2'	protein_coding
6	109301708	109416607	-	ENSG00000080546	FANTOM5	'SESN1'	protein_coding
6	109169625	109319681	+	ENSG00000118690	FANTOM5	'ARMC2'	protein_coding
6	109301708	109416607	-	ENSG00000080546	FANTOM5	'SESN1'	protein_coding
6	109169625	109319681	+	ENSG00000118690	FANTOM5	'ARMC2'	protein_coding
6	109301708	109416607	-	ENSG00000080546	FANTOM5	'SESN1'	protein_coding
6	109169625	109319681	+	ENSG00000118690	FANTOM5	'ARMC2'	protein_coding
6	109301708	109416607	-	ENSG00000080546	FANTOM5	'SESN1'	protein_coding
6	109169625	109319681	+	ENSG00000118690	FANTOM5	'ARMC2'	protein_coding
6	109301708	109416607	-	ENSG00000080546	FANTOM5	'SESN1'	protein_coding
6	109169625	109319681	+	ENSG00000118690	FANTOM5	'ARMC2'	protein_coding
6	109301708	109416607	-	ENSG00000080546	FANTOM5	'SESN1'	protein_coding
6	109169625	109319681	+	ENSG00000118690	FANTOM5	'ARMC2'	protein_coding
6	109301708	109416607	-	ENSG00000080546	FANTOM5	'SESN1'	protein_coding
6	109169625	109319681	+	ENSG00000118690	FANTOM5	'ARMC2'	protein_coding
6	109301708	109416607	-	ENSG00000080546	FANTOM5	'SESN1'	protein_coding
6	109301708	109416607	-	ENSG00000080546	FANTOM5	'SESN1'	protein_coding
6	109301708	109416607	-	ENSG00000080546	FANTOM5	'SESN1'	protein_coding
6	109301708	109416607	-	ENSG00000080546	FANTOM5	'SESN1'	protein_coding
6	109301708	109416607	-	ENSG00000080546	FANTOM5	'SESN1'	protein_coding
6	109301708	109416607	-	ENSG00000080546	FANTOM5	'SESN1'	protein_coding
6	109301708	109416607	-	ENSG00000080546	FANTOM5	'SESN1'	protein_coding
6	109301708	109416607	-	ENSG00000080546	FANTOM5	'SESN1'	protein_coding
6	109301708	109416607	-	ENSG00000080546	FANTOM5	'SESN1'	protein_coding
6	109301708	109416607	-	ENSG00000080546	FANTOM5	'SESN1'	protein_coding
6	109301708	109416607	-	ENSG00000080546	FANTOM5	'SESN1'	protein_coding
6	109301708	109416607	-	ENSG00000080546	FANTOM5	'SESN1'	protein_coding
6	109301708	109416607	-	ENSG00000080546	FANTOM5	'SESN1'	protein_coding
6	109301708	109416607	-	ENSG00000080546	FANTOM5	'SESN1'	protein_coding
6	109301708	109416607	-	ENSG00000080546	FANTOM5	'SESN1'	protein_coding
6	109301708	109416607	-	ENSG00000080546	FANTOM5	'SESN1'	protein_coding
6	109301708	109416607	-	ENSG00000080546	FANTOM5	'SESN1'	protein_coding
6	109301708	109416607	-	ENSG00000080546	FANTOM5	'SESN1'	protein_coding
6	109301708	109416607	-	ENSG00000080546	FANTOM5	'SESN1'	protein_coding
6	109301708	109416607	-	ENSG00000080546	FANTOM5	'SESN1'	protein_coding
6	109330895	109413138	+	CATG00000085291	FANTOM5	'CATG00000085291.1'	noncoding_lncRNA_divergent
6	109301708	109416607	-	ENSG00000080546	FANTOM5	'SESN1'	protein_coding
6	109330895	109413138	+	CATG00000085291	FANTOM5	'CATG00000085291.1'	noncoding_lncRNA_divergent
6	109301708	109416607	-	ENSG00000080546	FANTOM5	'SESN1'	protein_coding
6	109330895	109413138	+	CATG00000085291	FANTOM5	'CATG00000085291.1'	noncoding_lncRNA_divergent
6	109301708	109416607	-	ENSG00000080546	FANTOM5	'SESN1'	protein_coding
6	109330895	109413138	+	CATG00000085291	FANTOM5	'CATG00000085291.1'	noncoding_lncRNA_divergent
6	109301708	109416607	-	ENSG00000080546	FANTOM5	'SESN1'	protein_coding
6	109330895	109413138	+	CATG00000085291	FANTOM5	'CATG00000085291.1'	noncoding_lncRNA_divergent
6	109301708	109416607	-	ENSG00000080546	FANTOM5	'SESN1'	protein_coding
6	109330895	109413138	+	CATG00000085291	FANTOM5	'CATG00000085291.1'	noncoding_lncRNA_divergent
6	109301708	109416607	-	ENSG00000080546	FANTOM5	'SESN1'	protein_coding
6	109330895	109413138	+	CATG00000085291	FANTOM5	'CATG00000085291.1'	noncoding_lncRNA_divergent
6	109301708	109416607	-	ENSG00000080546	FANTOM5	'SESN1'	protein_coding
6	109330895	109413138	+	CATG00000085291	FANTOM5	'CATG00000085291.1'	noncoding_lncRNA_divergent
6	109301708	109416607	-	ENSG00000080546	FANTOM5	'SESN1'	protein_coding
6	109330895	109413138	+	CATG00000085291	FANTOM5	'CATG00000085291.1'	noncoding_lncRNA_divergent
6	109301708	109416607	-	ENSG00000080546	FANTOM5	'SESN1'	protein_coding
6	109330895	109413138	+	CATG00000085291	FANTOM5	'CATG00000085291.1'	noncoding_lncRNA_divergent
6	109301708	109416607	-	ENSG00000080546	FANTOM5	'SESN1'	protein_coding
6	109330895	109413138	+	CATG00000085291	FANTOM5	'CATG00000085291.1'	noncoding_lncRNA_divergent
6	109301708	109416607	-	ENSG00000080546	FANTOM5	'SESN1'	protein_coding
6	109330895	109413138	+	CATG00000085291	FANTOM5	'CATG00000085291.1'	noncoding_lncRNA_divergent
6	109301708	109416607	-	ENSG00000080546	FANTOM5	'SESN1'	protein_coding
6	109330895	109413138	+	CATG00000085291	FANTOM5	'CATG00000085291.1'	noncoding_lncRNA_divergent
6	109301708	109416607	-	ENSG00000080546	FANTOM5	'SESN1'	protein_coding
6	109330895	109413138	+	CATG00000085291	FANTOM5	'CATG00000085291.1'	noncoding_lncRNA_divergent
6	109301708	109416607	-	ENSG00000080546	FANTOM5	'SESN1'	protein_coding
6	109330895	109413138	+	CATG00000085291	FANTOM5	'CATG00000085291.1'	noncoding_lncRNA_divergent
6	109301708	109416607	-	ENSG00000080546	FANTOM5	'SESN1'	protein_coding
6	109330895	109413138	+	CATG00000085291	FANTOM5	'CATG00000085291.1'	noncoding_lncRNA_divergent
6	109301708	109416607	-	ENSG00000080546	FANTOM5	'SESN1'	protein_coding
6	109330895	109413138	+	CATG00000085291	FANTOM5	'CATG00000085291.1'	noncoding_lncRNA_divergent
6	109301708	109416607	-	ENSG00000080546	FANTOM5	'SESN1'	protein_coding
6	109330895	109413138	+	CATG00000085291	FANTOM5	'CATG00000085291.1'	noncoding_lncRNA_divergent
6	109301708	109416607	-	ENSG00000080546	FANTOM5	'SESN1'	protein_coding
6	109330895	109413138	+	CATG00000085291	FANTOM5	'CATG00000085291.1'	noncoding_lncRNA_divergent
6	109301708	109416607	-	ENSG00000080546	FANTOM5	'SESN1'	protein_coding
6	109330895	109413138	+	CATG00000085291	FANTOM5	'CATG00000085291.1'	noncoding_lncRNA_divergent
6	109301708	109416607	-	ENSG00000080546	FANTOM5	'SESN1'	protein_coding
6	109330895	109413138	+	CATG00000085291	FANTOM5	'CATG00000085291.1'	noncoding_lncRNA_divergent
6	109301708	109416607	-	ENSG00000080546	FANTOM5	'SESN1'	protein_coding
6	109330895	109413138	+	CATG00000085291	FANTOM5	'CATG00000085291.1'	noncoding_lncRNA_divergent
6	109301708	109416607	-	ENSG00000080546	FANTOM5	'SESN1'	protein_coding
6	109330895	109413138	+	CATG00000085291	FANTOM5	'CATG00000085291.1'	noncoding_lncRNA_divergent
6	109301708	109416607	-	ENSG00000080546	FANTOM5	'SESN1'	protein_coding
6	109330895	109413138	+	CATG00000085291	FANTOM5	'CATG00000085291.1'	noncoding_lncRNA_divergent
6	109301708	109416607	-	ENSG00000080546	FANTOM5	'SESN1'	protein_coding
6	109330895	109413138	+	CATG00000085291	FANTOM5	'CATG00000085291.1'	noncoding_lncRNA_divergent
6	109301708	109416607	-	ENSG00000080546	FANTOM5	'SESN1'	protein_coding
6	109330895	109413138	+	CATG00000085291	FANTOM5	'CATG00000085291.1'	noncoding_lncRNA_divergent
6	109301708	109416607	-	ENSG00000080546	FANTOM5	'SESN1'	protein_coding
6	109330895	109413138	+	CATG00000085291	FANTOM5	'CATG00000085291.1'	noncoding_lncRNA_divergent
6	109301708	109416607	-	ENSG00000080546	FANTOM5	'SESN1'	protein_coding
6	109330895	109413138	+	CATG00000085291	FANTOM5	'CATG00000085291.1'	noncoding_lncRNA_divergent
6	109301708	109416607	-	ENSG00000080546	FANTOM5	'SESN1'	protein_coding
6	109330895	109413138	+	CATG00000085291	FANTOM5	'CATG00000085291.1'	noncoding_lncRNA_divergent
6	109301708	109416607	-	ENSG00000080546	FANTOM5	'SESN1'	protein_coding
6	109330895	109413138	+	CATG00000085291	FANTOM5	'CATG00000085291.1'	noncoding_lncRNA_divergent
6	109301708	109416607	-	ENSG00000080546	FANTOM5	'SESN1'	protein_coding
6	109330895	109413138	+	CATG00000085291	FANTOM5	'CATG00000085291.1'	noncoding_lncRNA_divergent
6	109301708	109416607	-	ENSG00000080546	FANTOM5	'SESN1'	protein_coding
6	109330895	109413138	+	CATG00000085291	FANTOM5	'CATG00000085291.1'	noncoding_lncRNA_divergent
6	109301708	109416607	-	ENSG00000080546	FANTOM5	'SESN1'	protein_coding
6	109330895	109413138	+	CATG00000085291	FANTOM5	'CATG00000085291.1'	noncoding_lncRNA_divergent
6	109301708	109416607	-	ENSG00000080546	FANTOM5	'SESN1'	protein_coding
6	109330895	109413138	+	CATG00000085291	FANTOM5	'CATG00000085291.1'	noncoding_lncRNA_divergent
6	109301708	109416607	-	ENSG00000080546	FANTOM5	'SESN1'	protein_coding
6	109330895	109413138	+	CATG00000085291	FANTOM5	'CATG00000085291.1'	noncoding_lncRNA_divergent
6	109301708	109416607	-	ENSG00000080546	FANTOM5	'SESN1'	protein_coding
6	109330895	109413138	+	CATG00000085291	FANTOM5	'CATG00000085291.1'	noncoding_lncRNA_divergent
6	109301708	109416607	-	ENSG00000080546	FANTOM5	'SESN1'	protein_coding
6	109330895	109413138	+	CATG00000085291	FANTOM5	'CATG00000085291.1'	noncoding_lncRNA_divergent
6	109301708	109416607	-	ENSG00000080546	FANTOM5	'SESN1'	protein_coding
6	109330895	109413138	+	CATG00000085291	FANTOM5	'CATG00000085291.1'	noncoding_lncRNA_divergent
6	109301708	109416607	-	ENSG00000080546	FANTOM5	'SESN1'	protein_coding
6	109330895	109413138	+	CATG00000085291	FANTOM5	'CATG00000085291.1'	noncoding_lncRNA_divergent
6	109301708	109416607	-	ENSG00000080546	FANTOM5	'SESN1'	protein_coding
6	109330895	109413138	+	CATG00000085291	FANTOM5	'CATG00000085291.1'	noncoding_lncRNA_divergent
6	109301708	109416607	-	ENSG00000080546	FANTOM5	'SESN1'	protein_coding
6	109330895	109413138	+	CATG00000085291	FANTOM5	'CATG00000085291.1'	noncoding_lncRNA_divergent
6	109301708	109416607	-	ENSG00000080546	FANTOM5	'SESN1'	protein_coding
6	109330895	109413138	+	CATG00000085291	FANTOM5	'CATG00000085291.1'	noncoding_lncRNA_divergent
6	109301708	109416607	-	ENSG00000080546	FANTOM5	'SESN1'	protein_coding
6	109330895	109413138	+	CATG00000085291	FANTOM5	'CATG00000085291.1'	noncoding_lncRNA_divergent
6	109301708	109416607	-	ENSG00000080546	FANTOM5	'SESN1'	protein_coding
6	109330895	109413138	+	CATG00000085291	FANTOM5	'CATG00000085291.1'	noncoding_lncRNA_divergent
6	109301708	109416607	-	ENSG00000080546	FANTOM5	'SESN1'	protein_coding
6	109330895	109413138	+	CATG00000085291	FANTOM5	'CATG00000085291.1'	noncoding_lncRNA_divergent
6	109301708	109416607	-	ENSG00000080546	FANTOM5	'SESN1'	protein_coding
6	109330895	109413138	+	CATG00000085291	FANTOM5	'CATG00000085291.1'	noncoding_lncRNA_divergent
6	109301708	109416607	-	ENSG00000080546	FANTOM5	'SESN1'	protein_coding
6	109330895	109413138	+	CATG00000085291	FANTOM5	'CATG00000085291.1'	noncoding_lncRNA_divergent
6	109301708	109416607	-	ENSG00000080546	FANTOM5	'SESN1'	protein_coding
6	109330895	109413138	+	CATG00000085291	FANTOM5	'CATG00000085291.1'	noncoding_lncRNA_divergent
6	109301708	109416607	-	ENSG00000080546	FANTOM5	'SESN1'	protein_coding
6	109330895	109413138	+	CATG00000085291	FANTOM5	'CATG00000085291.1'	noncoding_lncRNA_divergent
6	109301708	109416607	-	ENSG00000080546	FANTOM5	'SESN1'	protein_coding
6	109330895	109413138	+	CATG00000085291	FANTOM5	'CATG00000085291.1'	noncoding_lncRNA_divergent
6	109301708	109416607	-	ENSG00000080546	FANTOM5	'SESN1'	protein_coding
6	109330895	109413138	+	CATG00000085291	FANTOM5	'CATG00000085291.1'	noncoding_lncRNA_divergent
6	109301708	109416607	-	ENSG00000080546	FANTOM5	'SESN1'	protein_coding
6	109330895	109413138	+	CATG00000085291	FANTOM5	'CATG00000085291.1'	noncoding_lncRNA_divergent
6	109301708	109416607	-	ENSG00000080546	FANTOM5	'SESN1'	protein_coding
6	109330895	109413138	+	CATG00000085291	FANTOM5	'CATG00000085291.1'	noncoding_lncRNA_divergent
6	109301708	109416607	-	ENSG00000080546	FANTOM5	'SESN1'	protein_coding
6	109330895	109413138	+	CATG00000085291	FANTOM5	'CATG00000085291.1'	noncoding_lncRNA_divergent
6	109301708	109416607	-	ENSG00000080546	FANTOM5	'SESN1'	protein_coding
6	109330895	109413138	+	CATG00000085291	FANTOM5	'CATG00000085291.1'	noncoding_lncRNA_divergent
6	109301708	109416607	-	ENSG00000080546	FANTOM5	'SESN1'	protein_coding
6	109330895	109413138	+	CATG00000085291	FANTOM5	'CATG00000085291.1'	noncoding_lncRNA_divergent
6	109301708	109416607	-	ENSG00000080546	FANTOM5	'SESN1'	protein_coding
6	109330895	109413138	+	CATG00000085291	FANTOM5	'CATG00000085291.1'	noncoding_lncRNA_divergent
6	109301708	109416607	-	ENSG00000080546	FANTOM5	'SESN1'	protein_coding
6	109330895	109413138	+	CATG00000085291	FANTOM5	'CATG00000085291.1'	noncoding_lncRNA_divergent
6	109301708	109416607	-	ENSG00000080546	FANTOM5	'SESN1'	protein_coding
6	109330895	109413138	+	CATG00000085291	FANTOM5	'CATG00000085291.1'	noncoding_lncRNA_divergent
6	109301708	109416607	-	ENSG00000080546	FANTOM5	'SESN1'	protein_coding
6	109330895	109413138	+	CATG00000085291	FANTOM5	'CATG00000085291.1'	noncoding_lncRNA_divergent
6	109301708	109416607	-	ENSG00000080546	FANTOM5	'SESN1'	protein_coding
6	109330895	109413138	+	CATG00000085291	FANTOM5	'CATG00000085291.1'	noncoding_lncRNA_divergent
6	109301708	109416607	-	ENSG00000080546	FANTOM5	'SESN1'	protein_coding
6	109330895	109413138	+	CATG00000085291	FANTOM5	'CATG00000085291.1'	noncoding_lncRNA_divergent
6	109301708	109416607	-	ENSG00000080546	FANTOM5	'SESN1'	protein_coding
6	109330895	109413138	+	CATG00000085291	FANTOM5	'CATG00000085291.1'	noncoding_lncRNA_divergent
6	109301708	109416607	-	ENSG00000080546	FANTOM5	'SESN1'	protein_coding
6	109330895	109413138	+	CATG00000085291	FANTOM5	'CATG00000085291.1'	noncoding_lncRNA_divergent
6	109301708	109416607	-	ENSG00000080546	FANTOM5	'SESN1'	protein_coding
6	109330895	109413138	+	CATG00000085291	FANTOM5	'CATG00000085291.1'	noncoding_lncRNA_divergent
6	109301708	109416607	-	ENSG00000080546	FANTOM5	'SESN1'	protein_coding
6	109330895	109413138	+	CATG00000085291	FANTOM5	'CATG00000085291.1'	noncoding_lncRNA_divergent
6	109301708	109416607	-	ENSG00000080546	FANTOM5	'SESN1'	protein_coding
6	109330895	109413138	+	CATG00000085291	FANTOM5	'CATG00000085291.1'	noncoding_lncRNA_divergent
6	109301708	109416607	-	ENSG00000080546	FANTOM5	'SESN1'	protein_coding
6	109330895	109413138	+	CATG00000085291	FANTOM5	'CATG00000085291.1'	noncoding_lncRNA_divergent
6	109301708	109416607	-	ENSG00000080546	FANTOM5	'SESN1'	protein_coding
6	109330895	109413138	+	CATG00000085291	FANTOM5	'CATG00000085291.1'	noncoding_lncRNA_divergent
6	109301708	109416607	-	ENSG00000080546	FANTOM5	'SESN1'	protein_coding
6	109330895	109413138	+	CATG00000085291	FANTOM5	'CATG00000085291.1'	noncoding_lncRNA_divergent
6	109301708	109416607	-	ENSG00000080546	FANTOM5	'SESN1'	protein_coding
6	109330895	109413138	+	CATG00000085291	FANTOM5	'CATG00000085291.1'	noncoding_lncRNA_divergent
6	109301708	109416607	-	ENSG00000080546	FANTOM5	'SESN1'	protein_coding
6	109330895	109413138	+	CATG00000085291	FANTOM5	'CATG00000085291.1'	noncoding_lncRNA_divergent
6	109301708	109416607	-	ENSG00000080546	FANTOM5	'SESN1'	protein_coding
6	109330895	109413138	+	CATG00000085291	FANTOM5	'CATG00000085291.1'	noncoding_lncRNA_divergent
6	109301708	109416607	-	ENSG00000080546	FANTOM5	'SESN1'	protein_coding
6	109330895	109413138	+	CATG00000085291	FANTOM5	'CATG00000085291.1'	noncoding_lncRNA_divergent
6	109301708	109416607	-	ENSG00000080546	FANTOM5	'SESN1'	protein_coding
6	109330895	109413138	+	CATG00000085291	FANTOM5	'CATG00000085291.1'	noncoding_lncRNA_divergent
6	109301708	109416607	-	ENSG00000080546	FANTOM5	'SESN1'	protein_coding
6	109330895	109413138	+	CATG00000085291	FANTOM5	'CATG00000085291.1'	noncoding_lncRNA_divergent
6	109301708	109416607	-	ENSG00000080546	FANTOM5	'SESN1'	protein_coding
6	153327153	153452382	-	ENSG00000091844	FANTOM5	'RGS17'	protein_coding
6	153327153	153452382	-	ENSG00000091844	FANTOM5	'RGS17'	protein_coding
6	153327153	153452382	-	ENSG00000091844	FANTOM5	'RGS17'	protein_coding
6	153327153	153452382	-	ENSG00000091844	FANTOM5	'RGS17'	protein_coding
6	153327153	153452382	-	ENSG00000091844	FANTOM5	'RGS17'	protein_coding
6	153327153	153452382	-	ENSG00000091844	FANTOM5	'RGS17'	protein_coding
6	153327153	153452382	-	ENSG00000091844	FANTOM5	'RGS17'	protein_coding
6	153327153	153452382	-	ENSG00000091844	FANTOM5	'RGS17'	protein_coding
6	153327153	153452382	-	ENSG00000091844	FANTOM5	'RGS17'	protein_coding
6	153327153	153452382	-	ENSG00000091844	FANTOM5	'RGS17'	protein_coding
6	153327153	153452382	-	ENSG00000091844	FANTOM5	'RGS17'	protein_coding
6	153327153	153452382	-	ENSG00000091844	FANTOM5	'RGS17'	protein_coding
6	153327153	153452382	-	ENSG00000091844	FANTOM5	'RGS17'	protein_coding
6	153327153	153452382	-	ENSG00000091844	FANTOM5	'RGS17'	protein_coding
6	153327153	153452382	-	ENSG00000091844	FANTOM5	'RGS17'	protein_coding
6	153327153	153452382	-	ENSG00000091844	FANTOM5	'RGS17'	protein_coding
6	153327153	153452382	-	ENSG00000091844	FANTOM5	'RGS17'	protein_coding
6	153327153	153452382	-	ENSG00000091844	FANTOM5	'RGS17'	protein_coding
6	153327153	153452382	-	ENSG00000091844	FANTOM5	'RGS17'	protein_coding
6	153327153	153452382	-	ENSG00000091844	FANTOM5	'RGS17'	protein_coding
6	153327153	153452382	-	ENSG00000091844	FANTOM5	'RGS17'	protein_coding
6	153327153	153452382	-	ENSG00000091844	FANTOM5	'RGS17'	protein_coding
6	153327153	153452382	-	ENSG00000091844	FANTOM5	'RGS17'	protein_coding
6	153327153	153452382	-	ENSG00000091844	FANTOM5	'RGS17'	protein_coding
6	153327153	153452382	-	ENSG00000091844	FANTOM5	'RGS17'	protein_coding
6	153327153	153452382	-	ENSG00000091844	FANTOM5	'RGS17'	protein_coding
6	153327153	153452382	-	ENSG00000091844	FANTOM5	'RGS17'	protein_coding
6	153327153	153452382	-	ENSG00000091844	FANTOM5	'RGS17'	protein_coding
6	153327153	153452382	-	ENSG00000091844	FANTOM5	'RGS17'	protein_coding
6	153327153	153452382	-	ENSG00000091844	FANTOM5	'RGS17'	protein_coding
6	153327153	153452382	-	ENSG00000091844	FANTOM5	'RGS17'	protein_coding
6	153327153	153452382	-	ENSG00000091844	FANTOM5	'RGS17'	protein_coding
6	153327153	153452382	-	ENSG00000091844	FANTOM5	'RGS17'	protein_coding
6	153327153	153452382	-	ENSG00000091844	FANTOM5	'RGS17'	protein_coding
6	153327153	153452382	-	ENSG00000091844	FANTOM5	'RGS17'	protein_coding
6	153327153	153452382	-	ENSG00000091844	FANTOM5	'RGS17'	protein_coding
6	153327153	153452382	-	ENSG00000091844	FANTOM5	'RGS17'	protein_coding
6	153327153	153452382	-	ENSG00000091844	FANTOM5	'RGS17'	protein_coding
6	153327153	153452382	-	ENSG00000091844	FANTOM5	'RGS17'	protein_coding
6	153327153	153452382	-	ENSG00000091844	FANTOM5	'RGS17'	protein_coding
6	153327153	153452382	-	ENSG00000091844	FANTOM5	'RGS17'	protein_coding
6	153327153	153452382	-	ENSG00000091844	FANTOM5	'RGS17'	protein_coding
6	153327153	153452382	-	ENSG00000091844	FANTOM5	'RGS17'	protein_coding
6	153327153	153452382	-	ENSG00000091844	FANTOM5	'RGS17'	protein_coding
6	153327153	153452382	-	ENSG00000091844	FANTOM5	'RGS17'	protein_coding
6	153327153	153452382	-	ENSG00000091844	FANTOM5	'RGS17'	protein_coding
6	153327153	153452382	-	ENSG00000091844	FANTOM5	'RGS17'	protein_coding
6	153327153	153452382	-	ENSG00000091844	FANTOM5	'RGS17'	protein_coding
6	153327153	153452382	-	ENSG00000091844	FANTOM5	'RGS17'	protein_coding
6	153327153	153452382	-	ENSG00000091844	FANTOM5	'RGS17'	protein_coding
6	153327153	153452382	-	ENSG00000091844	FANTOM5	'RGS17'	protein_coding
6	153327153	153452382	-	ENSG00000091844	FANTOM5	'RGS17'	protein_coding
6	153327153	153452382	-	ENSG00000091844	FANTOM5	'RGS17'	protein_coding
6	153327153	153452382	-	ENSG00000091844	FANTOM5	'RGS17'	protein_coding
6	153327153	153452382	-	ENSG00000091844	FANTOM5	'RGS17'	protein_coding
6	153327153	153452382	-	ENSG00000091844	FANTOM5	'RGS17'	protein_coding
6	153327153	153452382	-	ENSG00000091844	FANTOM5	'RGS17'	protein_coding
6	153327153	153452382	-	ENSG00000091844	FANTOM5	'RGS17'	protein_coding
6	160542918	160581624	+	ENSG00000175003	FANTOM5	'SLC22A1'	protein_coding
6	31082549	31108200	+	ENSG00000204540	FANTOM5	'PSORS1C1'	protein_coding
6	31108504	31108690	+	ENSG00000238211	Ensembl	'POLR2LP'	noncoding_pseudogene
6	31109550	31125966	-	ENSG00000204536	FANTOM5	'CCHCR1'	protein_coding
6	31109550	31125966	-	ENSG00000204536	FANTOM5	'CCHCR1'	protein_coding
6	31109550	31125966	-	ENSG00000204536	FANTOM5	'CCHCR1'	protein_coding
6	31109550	31125966	-	ENSG00000204536	FANTOM5	'CCHCR1'	protein_coding
6	32191649	32375619	+	ENSG00000228962	FANTOM5	'HCG23'	noncoding_lncRNA_intergenic
6	32191649	32375619	+	ENSG00000228962	FANTOM5	'HCG23'	noncoding_lncRNA_intergenic
6	32191649	32375619	+	ENSG00000228962	FANTOM5	'HCG23'	noncoding_lncRNA_intergenic
7	20973345	21003787	-	CATG00000095379	FANTOM5	'CATG00000095379.1'	noncoding_lncRNA_intergenic
7	20874995	21109484	+	ENSG00000232790	FANTOM5	'AC006481.1'	noncoding_lncRNA_intergenic
7	20973345	21003787	-	CATG00000095379	FANTOM5	'CATG00000095379.1'	noncoding_lncRNA_intergenic
7	20874995	21109484	+	ENSG00000232790	FANTOM5	'AC006481.1'	noncoding_lncRNA_intergenic
7	20973345	21003787	-	CATG00000095379	FANTOM5	'CATG00000095379.1'	noncoding_lncRNA_intergenic
7	20874995	21109484	+	ENSG00000232790	FANTOM5	'AC006481.1'	noncoding_lncRNA_intergenic
7	97736184	97839892	+	ENSG00000164715	FANTOM5	'LMTK2'	protein_coding
7	97736184	97839892	+	ENSG00000164715	FANTOM5	'LMTK2'	protein_coding
7	97736184	97839892	+	ENSG00000164715	FANTOM5	'LMTK2'	protein_coding
7	97736184	97839892	+	ENSG00000164715	FANTOM5	'LMTK2'	protein_coding
7	97736184	97839892	+	ENSG00000164715	FANTOM5	'LMTK2'	protein_coding
7	97736184	97839892	+	ENSG00000164715	FANTOM5	'LMTK2'	protein_coding
7	97736184	97839892	+	ENSG00000164715	FANTOM5	'LMTK2'	protein_coding
7	97736184	97839892	+	ENSG00000164715	FANTOM5	'LMTK2'	protein_coding
7	97736184	97839892	+	ENSG00000164715	FANTOM5	'LMTK2'	protein_coding
7	97736184	97839892	+	ENSG00000164715	FANTOM5	'LMTK2'	protein_coding
7	97736184	97839892	+	ENSG00000164715	FANTOM5	'LMTK2'	protein_coding
7	97736184	97839892	+	ENSG00000164715	FANTOM5	'LMTK2'	protein_coding
7	97736184	97839892	+	ENSG00000164715	FANTOM5	'LMTK2'	protein_coding
7	97736184	97839892	+	ENSG00000164715	FANTOM5	'LMTK2'	protein_coding
7	97736184	97839892	+	ENSG00000164715	FANTOM5	'LMTK2'	protein_coding
7	97736184	97839892	+	ENSG00000164715	FANTOM5	'LMTK2'	protein_coding
7	97736184	97839892	+	ENSG00000164715	FANTOM5	'LMTK2'	protein_coding
7	97736184	97839892	+	ENSG00000164715	FANTOM5	'LMTK2'	protein_coding
7	97736184	97839892	+	ENSG00000164715	FANTOM5	'LMTK2'	protein_coding
7	97736184	97839892	+	ENSG00000164715	FANTOM5	'LMTK2'	protein_coding
7	97839993	97846818	+	ENSG00000180535	FANTOM5	'BHLHA15'	protein_coding
8	127857278	128203887	+	ENSG00000253438	FANTOM5	'PCAT1'	noncoding_lncRNA_intergenic
8	127857278	128203887	+	ENSG00000253438	FANTOM5	'PCAT1'	noncoding_lncRNA_intergenic
8	127857278	128203887	+	ENSG00000253438	FANTOM5	'PCAT1'	noncoding_lncRNA_intergenic
8	23492813	23663155	+	ENSG00000253471	FANTOM5	'RP11-175E9.1'	noncoding_lncRNA_intergenic
8	23492813	23663155	+	ENSG00000253471	FANTOM5	'RP11-175E9.1'	noncoding_lncRNA_intergenic
8	23492813	23663155	+	ENSG00000253471	FANTOM5	'RP11-175E9.1'	noncoding_lncRNA_intergenic
8	23492813	23663155	+	ENSG00000253471	FANTOM5	'RP11-175E9.1'	noncoding_lncRNA_intergenic
8	23492813	23663155	+	ENSG00000253471	FANTOM5	'RP11-175E9.1'	noncoding_lncRNA_intergenic
8	23492813	23663155	+	ENSG00000253471	FANTOM5	'RP11-175E9.1'	noncoding_lncRNA_intergenic
8	23492813	23663155	+	ENSG00000253471	FANTOM5	'RP11-175E9.1'	noncoding_lncRNA_intergenic
8	23492813	23663155	+	ENSG00000253471	FANTOM5	'RP11-175E9.1'	noncoding_lncRNA_intergenic
8	23492813	23663155	+	ENSG00000253471	FANTOM5	'RP11-175E9.1'	noncoding_lncRNA_intergenic
8	23492813	23663155	+	ENSG00000253471	FANTOM5	'RP11-175E9.1'	noncoding_lncRNA_intergenic
8	23492813	23663155	+	ENSG00000253471	FANTOM5	'RP11-175E9.1'	noncoding_lncRNA_intergenic
8	23492813	23663155	+	ENSG00000253471	FANTOM5	'RP11-175E9.1'	noncoding_lncRNA_intergenic
8	23492813	23663155	+	ENSG00000253471	FANTOM5	'RP11-175E9.1'	noncoding_lncRNA_intergenic
8	23492813	23663155	+	ENSG00000253471	FANTOM5	'RP11-175E9.1'	noncoding_lncRNA_intergenic
8	23492813	23663155	+	ENSG00000253471	FANTOM5	'RP11-175E9.1'	noncoding_lncRNA_intergenic
8	23492813	23663155	+	ENSG00000253471	FANTOM5	'RP11-175E9.1'	noncoding_lncRNA_intergenic
8	23492813	23663155	+	ENSG00000253471	FANTOM5	'RP11-175E9.1'	noncoding_lncRNA_intergenic
8	23492813	23663155	+	ENSG00000253471	FANTOM5	'RP11-175E9.1'	noncoding_lncRNA_intergenic
8	23492813	23663155	+	ENSG00000253471	FANTOM5	'RP11-175E9.1'	noncoding_lncRNA_intergenic
8	23492813	23663155	+	ENSG00000253471	FANTOM5	'RP11-175E9.1'	noncoding_lncRNA_intergenic
8	23492813	23663155	+	ENSG00000253471	FANTOM5	'RP11-175E9.1'	noncoding_lncRNA_intergenic
8	23492813	23663155	+	ENSG00000253471	FANTOM5	'RP11-175E9.1'	noncoding_lncRNA_intergenic
8	23492813	23663155	+	ENSG00000253471	FANTOM5	'RP11-175E9.1'	noncoding_lncRNA_intergenic
8	23492813	23663155	+	ENSG00000253471	FANTOM5	'RP11-175E9.1'	noncoding_lncRNA_intergenic
8	23492813	23663155	+	ENSG00000253471	FANTOM5	'RP11-175E9.1'	noncoding_lncRNA_intergenic
8	23492813	23663155	+	ENSG00000253471	FANTOM5	'RP11-175E9.1'	noncoding_lncRNA_intergenic
8	23492813	23663155	+	ENSG00000253471	FANTOM5	'RP11-175E9.1'	noncoding_lncRNA_intergenic
8	23492813	23663155	+	ENSG00000253471	FANTOM5	'RP11-175E9.1'	noncoding_lncRNA_intergenic
8	23492813	23663155	+	ENSG00000253471	FANTOM5	'RP11-175E9.1'	noncoding_lncRNA_intergenic
8	23492813	23663155	+	ENSG00000253471	FANTOM5	'RP11-175E9.1'	noncoding_lncRNA_intergenic
8	23492813	23663155	+	ENSG00000253471	FANTOM5	'RP11-175E9.1'	noncoding_lncRNA_intergenic
8	23492813	23663155	+	ENSG00000253471	FANTOM5	'RP11-175E9.1'	noncoding_lncRNA_intergenic
8	23492813	23663155	+	ENSG00000253471	FANTOM5	'RP11-175E9.1'	noncoding_lncRNA_intergenic
8	23492813	23663155	+	ENSG00000253471	FANTOM5	'RP11-175E9.1'	noncoding_lncRNA_intergenic
8	23492813	23663155	+	ENSG00000253471	FANTOM5	'RP11-175E9.1'	noncoding_lncRNA_intergenic
8	23492813	23663155	+	ENSG00000253471	FANTOM5	'RP11-175E9.1'	noncoding_lncRNA_intergenic
8	23492813	23663155	+	ENSG00000253471	FANTOM5	'RP11-175E9.1'	noncoding_lncRNA_intergenic
8	23492813	23663155	+	ENSG00000253471	FANTOM5	'RP11-175E9.1'	noncoding_lncRNA_intergenic
8	23492813	23663155	+	ENSG00000253471	FANTOM5	'RP11-175E9.1'	noncoding_lncRNA_intergenic
8	23492813	23663155	+	ENSG00000253471	FANTOM5	'RP11-175E9.1'	noncoding_lncRNA_intergenic
8	23492813	23663155	+	ENSG00000253471	FANTOM5	'RP11-175E9.1'	noncoding_lncRNA_intergenic
8	23492813	23663155	+	ENSG00000253471	FANTOM5	'RP11-175E9.1'	noncoding_lncRNA_intergenic
8	23492813	23663155	+	ENSG00000253471	FANTOM5	'RP11-175E9.1'	noncoding_lncRNA_intergenic
8	23492813	23663155	+	ENSG00000253471	FANTOM5	'RP11-175E9.1'	noncoding_lncRNA_intergenic
8	23492813	23663155	+	ENSG00000253471	FANTOM5	'RP11-175E9.1'	noncoding_lncRNA_intergenic
8	23492813	23663155	+	ENSG00000253471	FANTOM5	'RP11-175E9.1'	noncoding_lncRNA_intergenic
8	23492813	23663155	+	ENSG00000253471	FANTOM5	'RP11-175E9.1'	noncoding_lncRNA_intergenic
8	23492813	23663155	+	ENSG00000253471	FANTOM5	'RP11-175E9.1'	noncoding_lncRNA_intergenic
8	23492813	23663155	+	ENSG00000253471	FANTOM5	'RP11-175E9.1'	noncoding_lncRNA_intergenic
8	23492813	23663155	+	ENSG00000253471	FANTOM5	'RP11-175E9.1'	noncoding_lncRNA_intergenic
8	23492813	23663155	+	ENSG00000253471	FANTOM5	'RP11-175E9.1'	noncoding_lncRNA_intergenic
8	23492813	23663155	+	ENSG00000253471	FANTOM5	'RP11-175E9.1'	noncoding_lncRNA_intergenic
8	23492813	23663155	+	ENSG00000253471	FANTOM5	'RP11-175E9.1'	noncoding_lncRNA_intergenic
8	23492813	23663155	+	ENSG00000253471	FANTOM5	'RP11-175E9.1'	noncoding_lncRNA_intergenic
8	23492813	23663155	+	ENSG00000253471	FANTOM5	'RP11-175E9.1'	noncoding_lncRNA_intergenic
8	23492813	23663155	+	ENSG00000253471	FANTOM5	'RP11-175E9.1'	noncoding_lncRNA_intergenic
8	23492813	23663155	+	ENSG00000253471	FANTOM5	'RP11-175E9.1'	noncoding_lncRNA_intergenic
8	23492813	23663155	+	ENSG00000253471	FANTOM5	'RP11-175E9.1'	noncoding_lncRNA_intergenic
8	23492813	23663155	+	ENSG00000253471	FANTOM5	'RP11-175E9.1'	noncoding_lncRNA_intergenic
8	23492813	23663155	+	ENSG00000253471	FANTOM5	'RP11-175E9.1'	noncoding_lncRNA_intergenic
8	23492813	23663155	+	ENSG00000253471	FANTOM5	'RP11-175E9.1'	noncoding_lncRNA_intergenic
8	23492813	23663155	+	ENSG00000253471	FANTOM5	'RP11-175E9.1'	noncoding_lncRNA_intergenic
8	23536206	23540448	-	ENSG00000167034	FANTOM5	'NKX3-1'	protein_coding
8	23492813	23663155	+	ENSG00000253471	FANTOM5	'RP11-175E9.1'	noncoding_lncRNA_intergenic
8	23536206	23540448	-	ENSG00000167034	FANTOM5	'NKX3-1'	protein_coding
8	23492813	23663155	+	ENSG00000253471	FANTOM5	'RP11-175E9.1'	noncoding_lncRNA_intergenic
8	23536206	23540448	-	ENSG00000167034	FANTOM5	'NKX3-1'	protein_coding
8	23492813	23663155	+	ENSG00000253471	FANTOM5	'RP11-175E9.1'	noncoding_lncRNA_intergenic
8	23536206	23540448	-	ENSG00000167034	FANTOM5	'NKX3-1'	protein_coding
8	23492813	23663155	+	ENSG00000253471	FANTOM5	'RP11-175E9.1'	noncoding_lncRNA_intergenic
8	23536206	23540448	-	ENSG00000167034	FANTOM5	'NKX3-1'	protein_coding
8	23492813	23663155	+	ENSG00000253471	FANTOM5	'RP11-175E9.1'	noncoding_lncRNA_intergenic
8	23536206	23540448	-	ENSG00000167034	FANTOM5	'NKX3-1'	protein_coding
8	23492813	23663155	+	ENSG00000253471	FANTOM5	'RP11-175E9.1'	noncoding_lncRNA_intergenic
8	23492813	23663155	+	ENSG00000253471	FANTOM5	'RP11-175E9.1'	noncoding_lncRNA_intergenic
8	23492813	23663155	+	ENSG00000253471	FANTOM5	'RP11-175E9.1'	noncoding_lncRNA_intergenic
8	23492813	23663155	+	ENSG00000253471	FANTOM5	'RP11-175E9.1'	noncoding_lncRNA_intergenic
8	23492813	23663155	+	ENSG00000253471	FANTOM5	'RP11-175E9.1'	noncoding_lncRNA_intergenic
8	23492813	23663155	+	ENSG00000253471	FANTOM5	'RP11-175E9.1'	noncoding_lncRNA_intergenic
8	23492813	23663155	+	ENSG00000253471	FANTOM5	'RP11-175E9.1'	noncoding_lncRNA_intergenic
8	23492813	23663155	+	ENSG00000253471	FANTOM5	'RP11-175E9.1'	noncoding_lncRNA_intergenic
8	23492813	23663155	+	ENSG00000253471	FANTOM5	'RP11-175E9.1'	noncoding_lncRNA_intergenic
8	128265497	128687136	-	ENSG00000246228	FANTOM5	'CASC8'	noncoding_lncRNA_intergenic
8	128265497	128687136	-	ENSG00000246228	FANTOM5	'CASC8'	noncoding_lncRNA_intergenic
8	128265497	128687136	-	ENSG00000246228	FANTOM5	'CASC8'	noncoding_lncRNA_intergenic
8	128265497	128687136	-	ENSG00000246228	FANTOM5	'CASC8'	noncoding_lncRNA_intergenic
8	128265497	128687136	-	ENSG00000246228	FANTOM5	'CASC8'	noncoding_lncRNA_intergenic
8	128265497	128687136	-	ENSG00000246228	FANTOM5	'CASC8'	noncoding_lncRNA_intergenic
8	128265497	128687136	-	ENSG00000246228	FANTOM5	'CASC8'	noncoding_lncRNA_intergenic
8	128265497	128687136	-	ENSG00000246228	FANTOM5	'CASC8'	noncoding_lncRNA_intergenic
8	128265497	128687136	-	ENSG00000246228	FANTOM5	'CASC8'	noncoding_lncRNA_intergenic
8	128265497	128687136	-	ENSG00000246228	FANTOM5	'CASC8'	noncoding_lncRNA_intergenic
8	128265497	128687136	-	ENSG00000246228	FANTOM5	'CASC8'	noncoding_lncRNA_intergenic
8	128265497	128687136	-	ENSG00000246228	FANTOM5	'CASC8'	noncoding_lncRNA_intergenic
8	128265497	128687136	-	ENSG00000246228	FANTOM5	'CASC8'	noncoding_lncRNA_intergenic
8	128265497	128687136	-	ENSG00000246228	FANTOM5	'CASC8'	noncoding_lncRNA_intergenic
8	128265497	128687136	-	ENSG00000246228	FANTOM5	'CASC8'	noncoding_lncRNA_intergenic
8	128265497	128687136	-	ENSG00000246228	FANTOM5	'CASC8'	noncoding_lncRNA_intergenic
8	128265497	128687136	-	ENSG00000246228	FANTOM5	'CASC8'	noncoding_lncRNA_intergenic
8	128265497	128687136	-	ENSG00000246228	FANTOM5	'CASC8'	noncoding_lncRNA_intergenic
8	128265497	128687136	-	ENSG00000246228	FANTOM5	'CASC8'	noncoding_lncRNA_intergenic
8	128265497	128687136	-	ENSG00000246228	FANTOM5	'CASC8'	noncoding_lncRNA_intergenic
8	128265497	128687136	-	ENSG00000246228	FANTOM5	'CASC8'	noncoding_lncRNA_intergenic
8	128265497	128687136	-	ENSG00000246228	FANTOM5	'CASC8'	noncoding_lncRNA_intergenic
8	128265497	128687136	-	ENSG00000246228	FANTOM5	'CASC8'	noncoding_lncRNA_intergenic
8	128265497	128687136	-	ENSG00000246228	FANTOM5	'CASC8'	noncoding_lncRNA_intergenic
8	128265497	128687136	-	ENSG00000246228	FANTOM5	'CASC8'	noncoding_lncRNA_intergenic
8	128265497	128687136	-	ENSG00000246228	FANTOM5	'CASC8'	noncoding_lncRNA_intergenic
8	128265497	128687136	-	ENSG00000246228	FANTOM5	'CASC8'	noncoding_lncRNA_intergenic
8	128265497	128687136	-	ENSG00000246228	FANTOM5	'CASC8'	noncoding_lncRNA_intergenic
8	128265497	128687136	-	ENSG00000246228	FANTOM5	'CASC8'	noncoding_lncRNA_intergenic
8	128265497	128687136	-	ENSG00000246228	FANTOM5	'CASC8'	noncoding_lncRNA_intergenic
8	128265497	128687136	-	ENSG00000246228	FANTOM5	'CASC8'	noncoding_lncRNA_intergenic
8	128265497	128687136	-	ENSG00000246228	FANTOM5	'CASC8'	noncoding_lncRNA_intergenic
8	128265497	128687136	-	ENSG00000246228	FANTOM5	'CASC8'	noncoding_lncRNA_intergenic
8	128265497	128687136	-	ENSG00000246228	FANTOM5	'CASC8'	noncoding_lncRNA_intergenic
8	128265497	128687136	-	ENSG00000246228	FANTOM5	'CASC8'	noncoding_lncRNA_intergenic
8	128265497	128687136	-	ENSG00000246228	FANTOM5	'CASC8'	noncoding_lncRNA_intergenic
8	128265497	128687136	-	ENSG00000246228	FANTOM5	'CASC8'	noncoding_lncRNA_intergenic
8	128265497	128687136	-	ENSG00000246228	FANTOM5	'CASC8'	noncoding_lncRNA_intergenic
8	128265497	128687136	-	ENSG00000246228	FANTOM5	'CASC8'	noncoding_lncRNA_intergenic
8	128265497	128687136	-	ENSG00000246228	FANTOM5	'CASC8'	noncoding_lncRNA_intergenic
8	128265497	128687136	-	ENSG00000246228	FANTOM5	'CASC8'	noncoding_lncRNA_intergenic
8	128265497	128687136	-	ENSG00000246228	FANTOM5	'CASC8'	noncoding_lncRNA_intergenic
8	128265497	128687136	-	ENSG00000246228	FANTOM5	'CASC8'	noncoding_lncRNA_intergenic
8	128265497	128687136	-	ENSG00000246228	FANTOM5	'CASC8'	noncoding_lncRNA_intergenic
8	128265497	128687136	-	ENSG00000246228	FANTOM5	'CASC8'	noncoding_lncRNA_intergenic
8	23492813	23663155	+	ENSG00000253471	FANTOM5	'RP11-175E9.1'	noncoding_lncRNA_intergenic
8	23492813	23663155	+	ENSG00000253471	FANTOM5	'RP11-175E9.1'	noncoding_lncRNA_intergenic
8	23492813	23663155	+	ENSG00000253471	FANTOM5	'RP11-175E9.1'	noncoding_lncRNA_intergenic
8	23492813	23663155	+	ENSG00000253471	FANTOM5	'RP11-175E9.1'	noncoding_lncRNA_intergenic
8	23492813	23663155	+	ENSG00000253471	FANTOM5	'RP11-175E9.1'	noncoding_lncRNA_intergenic
8	23492813	23663155	+	ENSG00000253471	FANTOM5	'RP11-175E9.1'	noncoding_lncRNA_intergenic
8	23492813	23663155	+	ENSG00000253471	FANTOM5	'RP11-175E9.1'	noncoding_lncRNA_intergenic
8	23492813	23663155	+	ENSG00000253471	FANTOM5	'RP11-175E9.1'	noncoding_lncRNA_intergenic
8	23492813	23663155	+	ENSG00000253471	FANTOM5	'RP11-175E9.1'	noncoding_lncRNA_intergenic
8	23492813	23663155	+	ENSG00000253471	FANTOM5	'RP11-175E9.1'	noncoding_lncRNA_intergenic
8	23492813	23663155	+	ENSG00000253471	FANTOM5	'RP11-175E9.1'	noncoding_lncRNA_intergenic
8	23492813	23663155	+	ENSG00000253471	FANTOM5	'RP11-175E9.1'	noncoding_lncRNA_intergenic
8	23492813	23663155	+	ENSG00000253471	FANTOM5	'RP11-175E9.1'	noncoding_lncRNA_intergenic
8	23492813	23663155	+	ENSG00000253471	FANTOM5	'RP11-175E9.1'	noncoding_lncRNA_intergenic
8	23492813	23663155	+	ENSG00000253471	FANTOM5	'RP11-175E9.1'	noncoding_lncRNA_intergenic
8	23492813	23663155	+	ENSG00000253471	FANTOM5	'RP11-175E9.1'	noncoding_lncRNA_intergenic
8	23492813	23663155	+	ENSG00000253471	FANTOM5	'RP11-175E9.1'	noncoding_lncRNA_intergenic
8	23492813	23663155	+	ENSG00000253471	FANTOM5	'RP11-175E9.1'	noncoding_lncRNA_intergenic
8	23492813	23663155	+	ENSG00000253471	FANTOM5	'RP11-175E9.1'	noncoding_lncRNA_intergenic
8	23492813	23663155	+	ENSG00000253471	FANTOM5	'RP11-175E9.1'	noncoding_lncRNA_intergenic
8	23492813	23663155	+	ENSG00000253471	FANTOM5	'RP11-175E9.1'	noncoding_lncRNA_intergenic
8	23492813	23663155	+	ENSG00000253471	FANTOM5	'RP11-175E9.1'	noncoding_lncRNA_intergenic
8	23492813	23663155	+	ENSG00000253471	FANTOM5	'RP11-175E9.1'	noncoding_lncRNA_intergenic
8	23492813	23663155	+	ENSG00000253471	FANTOM5	'RP11-175E9.1'	noncoding_lncRNA_intergenic
8	23492813	23663155	+	ENSG00000253471	FANTOM5	'RP11-175E9.1'	noncoding_lncRNA_intergenic
8	23492813	23663155	+	ENSG00000253471	FANTOM5	'RP11-175E9.1'	noncoding_lncRNA_intergenic
8	23492813	23663155	+	ENSG00000253471	FANTOM5	'RP11-175E9.1'	noncoding_lncRNA_intergenic
8	23492813	23663155	+	ENSG00000253471	FANTOM5	'RP11-175E9.1'	noncoding_lncRNA_intergenic
8	23492813	23663155	+	ENSG00000253471	FANTOM5	'RP11-175E9.1'	noncoding_lncRNA_intergenic
8	23492813	23663155	+	ENSG00000253471	FANTOM5	'RP11-175E9.1'	noncoding_lncRNA_intergenic
8	23492813	23663155	+	ENSG00000253471	FANTOM5	'RP11-175E9.1'	noncoding_lncRNA_intergenic
8	23492813	23663155	+	ENSG00000253471	FANTOM5	'RP11-175E9.1'	noncoding_lncRNA_intergenic
8	23492813	23663155	+	ENSG00000253471	FANTOM5	'RP11-175E9.1'	noncoding_lncRNA_intergenic
8	23492813	23663155	+	ENSG00000253471	FANTOM5	'RP11-175E9.1'	noncoding_lncRNA_intergenic
8	23492813	23663155	+	ENSG00000253471	FANTOM5	'RP11-175E9.1'	noncoding_lncRNA_intergenic
8	23492813	23663155	+	ENSG00000253471	FANTOM5	'RP11-175E9.1'	noncoding_lncRNA_intergenic
8	23492813	23663155	+	ENSG00000253471	FANTOM5	'RP11-175E9.1'	noncoding_lncRNA_intergenic
8	23492813	23663155	+	ENSG00000253471	FANTOM5	'RP11-175E9.1'	noncoding_lncRNA_intergenic
8	23492813	23663155	+	ENSG00000253471	FANTOM5	'RP11-175E9.1'	noncoding_lncRNA_intergenic
8	23536206	23540448	-	ENSG00000167034	FANTOM5	'NKX3-1'	protein_coding
8	23492813	23663155	+	ENSG00000253471	FANTOM5	'RP11-175E9.1'	noncoding_lncRNA_intergenic
8	23536206	23540448	-	ENSG00000167034	FANTOM5	'NKX3-1'	protein_coding
8	23492813	23663155	+	ENSG00000253471	FANTOM5	'RP11-175E9.1'	noncoding_lncRNA_intergenic
8	23536206	23540448	-	ENSG00000167034	FANTOM5	'NKX3-1'	protein_coding
8	23492813	23663155	+	ENSG00000253471	FANTOM5	'RP11-175E9.1'	noncoding_lncRNA_intergenic
8	25699239	25902913	-	ENSG00000221818	FANTOM5	'EBF2'	protein_coding
8	25699239	25902913	-	ENSG00000221818	FANTOM5	'EBF2'	protein_coding
10	51224608	51504108	-	CATG00000118069	FANTOM5	'CATG00000118069.1'	protein_coding
10	51224608	51504108	-	CATG00000118069	FANTOM5	'CATG00000118069.1'	protein_coding
10	51224608	51504108	-	CATG00000118069	FANTOM5	'CATG00000118069.1'	protein_coding
10	51224608	51504108	-	CATG00000118069	FANTOM5	'CATG00000118069.1'	protein_coding
10	51224608	51504108	-	CATG00000118069	FANTOM5	'CATG00000118069.1'	protein_coding
10	51224608	51504108	-	CATG00000118069	FANTOM5	'CATG00000118069.1'	protein_coding
10	51224608	51504108	-	CATG00000118069	FANTOM5	'CATG00000118069.1'	protein_coding
10	51224608	51504108	-	CATG00000118069	FANTOM5	'CATG00000118069.1'	protein_coding
10	51224608	51504108	-	CATG00000118069	FANTOM5	'CATG00000118069.1'	protein_coding
10	51224608	51504108	-	CATG00000118069	FANTOM5	'CATG00000118069.1'	protein_coding
10	51224608	51504108	-	CATG00000118069	FANTOM5	'CATG00000118069.1'	protein_coding
10	51224608	51504108	-	CATG00000118069	FANTOM5	'CATG00000118069.1'	protein_coding
10	51224608	51504108	-	CATG00000118069	FANTOM5	'CATG00000118069.1'	protein_coding
10	51224608	51504108	-	CATG00000118069	FANTOM5	'CATG00000118069.1'	protein_coding
10	51224608	51504108	-	CATG00000118069	FANTOM5	'CATG00000118069.1'	protein_coding
10	51224608	51504108	-	CATG00000118069	FANTOM5	'CATG00000118069.1'	protein_coding
10	51224608	51504108	-	CATG00000118069	FANTOM5	'CATG00000118069.1'	protein_coding
10	51224608	51504108	-	CATG00000118069	FANTOM5	'CATG00000118069.1'	protein_coding
10	51224608	51504108	-	CATG00000118069	FANTOM5	'CATG00000118069.1'	protein_coding
10	51224608	51504108	-	CATG00000118069	FANTOM5	'CATG00000118069.1'	protein_coding
10	51224608	51504108	-	CATG00000118069	FANTOM5	'CATG00000118069.1'	protein_coding
10	51224608	51504108	-	CATG00000118069	FANTOM5	'CATG00000118069.1'	protein_coding
10	51224608	51504108	-	CATG00000118069	FANTOM5	'CATG00000118069.1'	protein_coding
10	51224608	51504108	-	CATG00000118069	FANTOM5	'CATG00000118069.1'	protein_coding
10	51500892	51506125	+	CATG00000114863	FANTOM5	'CATG00000114863.1'	noncoding_lncRNA_intergenic
10	51224608	51504108	-	CATG00000118069	FANTOM5	'CATG00000118069.1'	protein_coding
10	51500892	51506125	+	CATG00000114863	FANTOM5	'CATG00000114863.1'	noncoding_lncRNA_intergenic
10	51224608	51504108	-	CATG00000118069	FANTOM5	'CATG00000118069.1'	protein_coding
10	51500892	51506125	+	CATG00000114863	FANTOM5	'CATG00000114863.1'	noncoding_lncRNA_intergenic
10	51224608	51504108	-	CATG00000118069	FANTOM5	'CATG00000118069.1'	protein_coding
10	51500892	51506125	+	CATG00000114863	FANTOM5	'CATG00000114863.1'	noncoding_lncRNA_intergenic
10	51224608	51504108	-	CATG00000118069	FANTOM5	'CATG00000118069.1'	protein_coding
10	51500892	51506125	+	CATG00000114863	FANTOM5	'CATG00000114863.1'	noncoding_lncRNA_intergenic
10	51224608	51504108	-	CATG00000118069	FANTOM5	'CATG00000118069.1'	protein_coding
10	51500892	51506125	+	CATG00000114863	FANTOM5	'CATG00000114863.1'	noncoding_lncRNA_intergenic
10	51224608	51504108	-	CATG00000118069	FANTOM5	'CATG00000118069.1'	protein_coding
10	51500892	51506125	+	CATG00000114863	FANTOM5	'CATG00000114863.1'	noncoding_lncRNA_intergenic
10	51224608	51504108	-	CATG00000118069	FANTOM5	'CATG00000118069.1'	protein_coding
10	51500892	51506125	+	CATG00000114863	FANTOM5	'CATG00000114863.1'	noncoding_lncRNA_intergenic
10	51224608	51504108	-	CATG00000118069	FANTOM5	'CATG00000118069.1'	protein_coding
10	51500892	51506125	+	CATG00000114863	FANTOM5	'CATG00000114863.1'	noncoding_lncRNA_intergenic
10	51224608	51504108	-	CATG00000118069	FANTOM5	'CATG00000118069.1'	protein_coding
10	51500892	51506125	+	CATG00000114863	FANTOM5	'CATG00000114863.1'	noncoding_lncRNA_intergenic
10	51224608	51504108	-	CATG00000118069	FANTOM5	'CATG00000118069.1'	protein_coding
10	51500892	51506125	+	CATG00000114863	FANTOM5	'CATG00000114863.1'	noncoding_lncRNA_intergenic
10	51224608	51504108	-	CATG00000118069	FANTOM5	'CATG00000118069.1'	protein_coding
10	51500892	51506125	+	CATG00000114863	FANTOM5	'CATG00000114863.1'	noncoding_lncRNA_intergenic
10	51224608	51504108	-	CATG00000118069	FANTOM5	'CATG00000118069.1'	protein_coding
10	51500892	51506125	+	CATG00000114863	FANTOM5	'CATG00000114863.1'	noncoding_lncRNA_intergenic
10	51224608	51504108	-	CATG00000118069	FANTOM5	'CATG00000118069.1'	protein_coding
10	51500892	51506125	+	CATG00000114863	FANTOM5	'CATG00000114863.1'	noncoding_lncRNA_intergenic
10	51500892	51506125	+	CATG00000114863	FANTOM5	'CATG00000114863.1'	noncoding_lncRNA_intergenic
10	51500892	51506125	+	CATG00000114863	FANTOM5	'CATG00000114863.1'	noncoding_lncRNA_intergenic
10	51500892	51506125	+	CATG00000114863	FANTOM5	'CATG00000114863.1'	noncoding_lncRNA_intergenic
10	51500892	51506125	+	CATG00000114863	FANTOM5	'CATG00000114863.1'	noncoding_lncRNA_intergenic
10	51500892	51506125	+	CATG00000114863	FANTOM5	'CATG00000114863.1'	noncoding_lncRNA_intergenic
10	51500892	51506125	+	CATG00000114863	FANTOM5	'CATG00000114863.1'	noncoding_lncRNA_intergenic
10	51531505	51562519	+	ENSG00000138294	FANTOM5	'MSMB'	protein_coding
10	51532102	51532586	-	ENSG00000228326	FANTOM5	'RP11-109G10.2'	noncoding_pseudogene
10	51531505	51562519	+	ENSG00000138294	FANTOM5	'MSMB'	protein_coding
10	51531505	51562519	+	ENSG00000138294	FANTOM5	'MSMB'	protein_coding
10	51531505	51562519	+	ENSG00000138294	FANTOM5	'MSMB'	protein_coding
10	51531505	51562519	+	ENSG00000138294	FANTOM5	'MSMB'	protein_coding
10	51531505	51562519	+	ENSG00000138294	FANTOM5	'MSMB'	protein_coding
10	51531505	51562519	+	ENSG00000138294	FANTOM5	'MSMB'	protein_coding
10	51531505	51562519	+	ENSG00000138294	FANTOM5	'MSMB'	protein_coding
10	51531505	51562519	+	ENSG00000138294	FANTOM5	'MSMB'	protein_coding
10	51531505	51562519	+	ENSG00000138294	FANTOM5	'MSMB'	protein_coding
10	51531505	51562519	+	ENSG00000138294	FANTOM5	'MSMB'	protein_coding
10	51531505	51562519	+	ENSG00000138294	FANTOM5	'MSMB'	protein_coding
10	51531505	51562519	+	ENSG00000138294	FANTOM5	'MSMB'	protein_coding
10	51531505	51562519	+	ENSG00000138294	FANTOM5	'MSMB'	protein_coding
10	51531505	51562519	+	ENSG00000138294	FANTOM5	'MSMB'	protein_coding
10	51531505	51562519	+	ENSG00000138294	FANTOM5	'MSMB'	protein_coding
10	51531505	51562519	+	ENSG00000138294	FANTOM5	'MSMB'	protein_coding
10	51531505	51562519	+	ENSG00000138294	FANTOM5	'MSMB'	protein_coding
10	51531505	51562519	+	ENSG00000138294	FANTOM5	'MSMB'	protein_coding
10	51531505	51562519	+	ENSG00000138294	FANTOM5	'MSMB'	protein_coding
10	51531505	51562519	+	ENSG00000138294	FANTOM5	'MSMB'	protein_coding
10	51531505	51562519	+	ENSG00000138294	FANTOM5	'MSMB'	protein_coding
10	51531505	51562519	+	ENSG00000138294	FANTOM5	'MSMB'	protein_coding
10	51531505	51562519	+	ENSG00000138294	FANTOM5	'MSMB'	protein_coding
10	51531505	51562519	+	ENSG00000138294	FANTOM5	'MSMB'	protein_coding
10	51531505	51562519	+	ENSG00000138294	FANTOM5	'MSMB'	protein_coding
10	51531505	51562519	+	ENSG00000138294	FANTOM5	'MSMB'	protein_coding
10	51531505	51562519	+	ENSG00000138294	FANTOM5	'MSMB'	protein_coding
10	51531505	51562519	+	ENSG00000138294	FANTOM5	'MSMB'	protein_coding
10	51531505	51562519	+	ENSG00000138294	FANTOM5	'MSMB'	protein_coding
10	51531505	51562519	+	ENSG00000138294	FANTOM5	'MSMB'	protein_coding
10	51531505	51562519	+	ENSG00000138294	FANTOM5	'MSMB'	protein_coding
10	51531505	51562519	+	ENSG00000138294	FANTOM5	'MSMB'	protein_coding
10	51531505	51562519	+	ENSG00000138294	FANTOM5	'MSMB'	protein_coding
10	51531505	51562519	+	ENSG00000138294	FANTOM5	'MSMB'	protein_coding
10	51531505	51562519	+	ENSG00000138294	FANTOM5	'MSMB'	protein_coding
10	51531505	51562519	+	ENSG00000138294	FANTOM5	'MSMB'	protein_coding
10	51531505	51562519	+	ENSG00000138294	FANTOM5	'MSMB'	protein_coding
10	51531505	51562519	+	ENSG00000138294	FANTOM5	'MSMB'	protein_coding
10	51531505	51562519	+	ENSG00000138294	FANTOM5	'MSMB'	protein_coding
10	51531505	51562519	+	ENSG00000138294	FANTOM5	'MSMB'	protein_coding
10	51531505	51562519	+	ENSG00000138294	FANTOM5	'MSMB'	protein_coding
10	51531505	51562519	+	ENSG00000138294	FANTOM5	'MSMB'	protein_coding
10	104402075	104423060	+	ENSG00000171206	FANTOM5	'TRIM8'	protein_coding
10	104402075	104423060	+	ENSG00000171206	FANTOM5	'TRIM8'	protein_coding
10	104402075	104423060	+	ENSG00000171206	FANTOM5	'TRIM8'	protein_coding
10	104402075	104423060	+	ENSG00000171206	FANTOM5	'TRIM8'	protein_coding
10	104402075	104423060	+	ENSG00000171206	FANTOM5	'TRIM8'	protein_coding
10	104402075	104423060	+	ENSG00000171206	FANTOM5	'TRIM8'	protein_coding
10	104402075	104423060	+	ENSG00000171206	FANTOM5	'TRIM8'	protein_coding
10	104402075	104423060	+	ENSG00000171206	FANTOM5	'TRIM8'	protein_coding
10	104425229	104474149	-	ENSG00000138175	FANTOM5	'ARL3'	protein_coding
10	104425229	104474149	-	ENSG00000138175	FANTOM5	'ARL3'	protein_coding
10	104425229	104474149	-	ENSG00000138175	FANTOM5	'ARL3'	protein_coding
10	104425229	104474149	-	ENSG00000138175	FANTOM5	'ARL3'	protein_coding
10	104425229	104474149	-	ENSG00000138175	FANTOM5	'ARL3'	protein_coding
10	51531505	51562519	+	ENSG00000138294	FANTOM5	'MSMB'	protein_coding
10	51531505	51562519	+	ENSG00000138294	FANTOM5	'MSMB'	protein_coding
10	51531505	51562519	+	ENSG00000138294	FANTOM5	'MSMB'	protein_coding
10	51531505	51562519	+	ENSG00000138294	FANTOM5	'MSMB'	protein_coding
10	51531505	51562519	+	ENSG00000138294	FANTOM5	'MSMB'	protein_coding
10	51531505	51562519	+	ENSG00000138294	FANTOM5	'MSMB'	protein_coding
10	51531505	51562519	+	ENSG00000138294	FANTOM5	'MSMB'	protein_coding
10	51531505	51562519	+	ENSG00000138294	FANTOM5	'MSMB'	protein_coding
10	51531505	51562519	+	ENSG00000138294	FANTOM5	'MSMB'	protein_coding
10	51531505	51562519	+	ENSG00000138294	FANTOM5	'MSMB'	protein_coding
10	51531505	51562519	+	ENSG00000138294	FANTOM5	'MSMB'	protein_coding
10	51531505	51562519	+	ENSG00000138294	FANTOM5	'MSMB'	protein_coding
10	51531505	51562519	+	ENSG00000138294	FANTOM5	'MSMB'	protein_coding
10	51531505	51562519	+	ENSG00000138294	FANTOM5	'MSMB'	protein_coding
10	51531505	51562519	+	ENSG00000138294	FANTOM5	'MSMB'	protein_coding
10	51531505	51562519	+	ENSG00000138294	FANTOM5	'MSMB'	protein_coding
10	51531505	51562519	+	ENSG00000138294	FANTOM5	'MSMB'	protein_coding
10	51531505	51562519	+	ENSG00000138294	FANTOM5	'MSMB'	protein_coding
10	51531505	51562519	+	ENSG00000138294	FANTOM5	'MSMB'	protein_coding
10	51531505	51562519	+	ENSG00000138294	FANTOM5	'MSMB'	protein_coding
10	51531505	51562519	+	ENSG00000138294	FANTOM5	'MSMB'	protein_coding
10	51531505	51562519	+	ENSG00000138294	FANTOM5	'MSMB'	protein_coding
10	51531505	51562519	+	ENSG00000138294	FANTOM5	'MSMB'	protein_coding
10	51531505	51562519	+	ENSG00000138294	FANTOM5	'MSMB'	protein_coding
10	51531505	51562519	+	ENSG00000138294	FANTOM5	'MSMB'	protein_coding
10	51531505	51562519	+	ENSG00000138294	FANTOM5	'MSMB'	protein_coding
10	51531505	51562519	+	ENSG00000138294	FANTOM5	'MSMB'	protein_coding
10	51531505	51562519	+	ENSG00000138294	FANTOM5	'MSMB'	protein_coding
10	51531505	51562519	+	ENSG00000138294	FANTOM5	'MSMB'	protein_coding
10	51531505	51562519	+	ENSG00000138294	FANTOM5	'MSMB'	protein_coding
11	102391239	102401478	-	ENSG00000137673	FANTOM5	'MMP7'	protein_coding
11	2150338	2278346	-	ENSG00000129965	FANTOM5	'INS-IGF2'	protein_coding
11	1959068	2278346	-	ENSG00000167244	FANTOM5	'IGF2'	protein_coding
11	2150338	2278346	-	ENSG00000129965	FANTOM5	'INS-IGF2'	protein_coding
11	1959068	2278346	-	ENSG00000167244	FANTOM5	'IGF2'	protein_coding
11	2150338	2278346	-	ENSG00000129965	FANTOM5	'INS-IGF2'	protein_coding
11	1959068	2278346	-	ENSG00000167244	FANTOM5	'IGF2'	protein_coding
11	2150338	2278346	-	ENSG00000129965	FANTOM5	'INS-IGF2'	protein_coding
11	1959068	2278346	-	ENSG00000167244	FANTOM5	'IGF2'	protein_coding
11	2150338	2278346	-	ENSG00000129965	FANTOM5	'INS-IGF2'	protein_coding
11	1959068	2278346	-	ENSG00000167244	FANTOM5	'IGF2'	protein_coding
11	2150338	2278346	-	ENSG00000129965	FANTOM5	'INS-IGF2'	protein_coding
11	1959068	2278346	-	ENSG00000167244	FANTOM5	'IGF2'	protein_coding
11	2150338	2278346	-	ENSG00000129965	FANTOM5	'INS-IGF2'	protein_coding
11	1959068	2278346	-	ENSG00000167244	FANTOM5	'IGF2'	protein_coding
11	2150338	2278346	-	ENSG00000129965	FANTOM5	'INS-IGF2'	protein_coding
11	1959068	2278346	-	ENSG00000167244	FANTOM5	'IGF2'	protein_coding
11	2150338	2278346	-	ENSG00000129965	FANTOM5	'INS-IGF2'	protein_coding
11	1959068	2278346	-	ENSG00000167244	FANTOM5	'IGF2'	protein_coding
11	2150338	2278346	-	ENSG00000129965	FANTOM5	'INS-IGF2'	protein_coding
11	1959068	2278346	-	ENSG00000167244	FANTOM5	'IGF2'	protein_coding
11	2150338	2278346	-	ENSG00000129965	FANTOM5	'INS-IGF2'	protein_coding
11	1959068	2278346	-	ENSG00000167244	FANTOM5	'IGF2'	protein_coding
11	2150338	2278346	-	ENSG00000129965	FANTOM5	'INS-IGF2'	protein_coding
11	1959068	2278346	-	ENSG00000167244	FANTOM5	'IGF2'	protein_coding
11	2150338	2278346	-	ENSG00000129965	FANTOM5	'INS-IGF2'	protein_coding
11	1959068	2278346	-	ENSG00000167244	FANTOM5	'IGF2'	protein_coding
11	2150338	2278346	-	ENSG00000129965	FANTOM5	'INS-IGF2'	protein_coding
11	1959068	2278346	-	ENSG00000167244	FANTOM5	'IGF2'	protein_coding
11	2150338	2278346	-	ENSG00000129965	FANTOM5	'INS-IGF2'	protein_coding
11	1959068	2278346	-	ENSG00000167244	FANTOM5	'IGF2'	protein_coding
11	2150338	2278346	-	ENSG00000129965	FANTOM5	'INS-IGF2'	protein_coding
11	1959068	2278346	-	ENSG00000167244	FANTOM5	'IGF2'	protein_coding
11	2150338	2278346	-	ENSG00000129965	FANTOM5	'INS-IGF2'	protein_coding
11	1959068	2278346	-	ENSG00000167244	FANTOM5	'IGF2'	protein_coding
11	2150338	2278346	-	ENSG00000129965	FANTOM5	'INS-IGF2'	protein_coding
11	1959068	2278346	-	ENSG00000167244	FANTOM5	'IGF2'	protein_coding
11	2150338	2278346	-	ENSG00000129965	FANTOM5	'INS-IGF2'	protein_coding
11	1959068	2278346	-	ENSG00000167244	FANTOM5	'IGF2'	protein_coding
11	2150338	2278346	-	ENSG00000129965	FANTOM5	'INS-IGF2'	protein_coding
11	1959068	2278346	-	ENSG00000167244	FANTOM5	'IGF2'	protein_coding
11	2150338	2278346	-	ENSG00000129965	FANTOM5	'INS-IGF2'	protein_coding
11	1959068	2278346	-	ENSG00000167244	FANTOM5	'IGF2'	protein_coding
11	2150338	2278346	-	ENSG00000129965	FANTOM5	'INS-IGF2'	protein_coding
11	1959068	2278346	-	ENSG00000167244	FANTOM5	'IGF2'	protein_coding
11	2150338	2278346	-	ENSG00000129965	FANTOM5	'INS-IGF2'	protein_coding
11	1959068	2278346	-	ENSG00000167244	FANTOM5	'IGF2'	protein_coding
11	2150338	2278346	-	ENSG00000129965	FANTOM5	'INS-IGF2'	protein_coding
11	1959068	2278346	-	ENSG00000167244	FANTOM5	'IGF2'	protein_coding
11	2150338	2278346	-	ENSG00000129965	FANTOM5	'INS-IGF2'	protein_coding
11	1959068	2278346	-	ENSG00000167244	FANTOM5	'IGF2'	protein_coding
11	2150338	2278346	-	ENSG00000129965	FANTOM5	'INS-IGF2'	protein_coding
11	1959068	2278346	-	ENSG00000167244	FANTOM5	'IGF2'	protein_coding
11	2150338	2278346	-	ENSG00000129965	FANTOM5	'INS-IGF2'	protein_coding
11	1959068	2278346	-	ENSG00000167244	FANTOM5	'IGF2'	protein_coding
11	2150338	2278346	-	ENSG00000129965	FANTOM5	'INS-IGF2'	protein_coding
11	1959068	2278346	-	ENSG00000167244	FANTOM5	'IGF2'	protein_coding
11	2150338	2278346	-	ENSG00000129965	FANTOM5	'INS-IGF2'	protein_coding
11	1959068	2278346	-	ENSG00000167244	FANTOM5	'IGF2'	protein_coding
11	2150338	2278346	-	ENSG00000129965	FANTOM5	'INS-IGF2'	protein_coding
11	1959068	2278346	-	ENSG00000167244	FANTOM5	'IGF2'	protein_coding
11	2150338	2278346	-	ENSG00000129965	FANTOM5	'INS-IGF2'	protein_coding
11	1959068	2278346	-	ENSG00000167244	FANTOM5	'IGF2'	protein_coding
11	2150338	2278346	-	ENSG00000129965	FANTOM5	'INS-IGF2'	protein_coding
11	1959068	2278346	-	ENSG00000167244	FANTOM5	'IGF2'	protein_coding
11	2150338	2278346	-	ENSG00000129965	FANTOM5	'INS-IGF2'	protein_coding
11	1959068	2278346	-	ENSG00000167244	FANTOM5	'IGF2'	protein_coding
11	2150338	2278346	-	ENSG00000129965	FANTOM5	'INS-IGF2'	protein_coding
11	1959068	2278346	-	ENSG00000167244	FANTOM5	'IGF2'	protein_coding
11	2150338	2278346	-	ENSG00000129965	FANTOM5	'INS-IGF2'	protein_coding
11	1959068	2278346	-	ENSG00000167244	FANTOM5	'IGF2'	protein_coding
11	2150338	2278346	-	ENSG00000129965	FANTOM5	'INS-IGF2'	protein_coding
11	1959068	2278346	-	ENSG00000167244	FANTOM5	'IGF2'	protein_coding
11	2150338	2278346	-	ENSG00000129965	FANTOM5	'INS-IGF2'	protein_coding
11	1959068	2278346	-	ENSG00000167244	FANTOM5	'IGF2'	protein_coding
11	2150338	2278346	-	ENSG00000129965	FANTOM5	'INS-IGF2'	protein_coding
11	1959068	2278346	-	ENSG00000167244	FANTOM5	'IGF2'	protein_coding
11	2150338	2278346	-	ENSG00000129965	FANTOM5	'INS-IGF2'	protein_coding
11	1959068	2278346	-	ENSG00000167244	FANTOM5	'IGF2'	protein_coding
11	2150338	2278346	-	ENSG00000129965	FANTOM5	'INS-IGF2'	protein_coding
11	1959068	2278346	-	ENSG00000167244	FANTOM5	'IGF2'	protein_coding
11	2150338	2278346	-	ENSG00000129965	FANTOM5	'INS-IGF2'	protein_coding
11	1959068	2278346	-	ENSG00000167244	FANTOM5	'IGF2'	protein_coding
11	2150338	2278346	-	ENSG00000129965	FANTOM5	'INS-IGF2'	protein_coding
11	1959068	2278346	-	ENSG00000167244	FANTOM5	'IGF2'	protein_coding
11	2150338	2278346	-	ENSG00000129965	FANTOM5	'INS-IGF2'	protein_coding
11	1959068	2278346	-	ENSG00000167244	FANTOM5	'IGF2'	protein_coding
11	2150338	2278346	-	ENSG00000129965	FANTOM5	'INS-IGF2'	protein_coding
11	1959068	2278346	-	ENSG00000167244	FANTOM5	'IGF2'	protein_coding
11	2150338	2278346	-	ENSG00000129965	FANTOM5	'INS-IGF2'	protein_coding
11	1959068	2278346	-	ENSG00000167244	FANTOM5	'IGF2'	protein_coding
11	68967662	69024477	+	CATG00000002792	FANTOM5	'CATG00000002792.1'	protein_coding
11	68967662	69024477	+	CATG00000002792	FANTOM5	'CATG00000002792.1'	protein_coding
11	68967662	69024477	+	CATG00000002792	FANTOM5	'CATG00000002792.1'	protein_coding
11	68967662	69024477	+	CATG00000002792	FANTOM5	'CATG00000002792.1'	protein_coding
11	68967662	69024477	+	CATG00000002792	FANTOM5	'CATG00000002792.1'	protein_coding
11	68967662	69024477	+	CATG00000002792	FANTOM5	'CATG00000002792.1'	protein_coding
11	68996178	69002400	-	CATG00000006003	FANTOM5	'CATG00000006003.1'	noncoding_lncRNA_intergenic
11	68967662	69024477	+	CATG00000002792	FANTOM5	'CATG00000002792.1'	protein_coding
11	68967662	69024477	+	CATG00000002792	FANTOM5	'CATG00000002792.1'	protein_coding
12	114676775	114679575	-	ENSG00000257476	Ensembl	'RP11-139B1.1'	noncoding_lncRNA_lincRNA
12	53266488	53267995	-	CATG00000012003	FANTOM5	'CATG00000012003.1'	noncoding_lncRNA_intergenic
12	53218090	53300496	-	ENSG00000170423	FANTOM5	'KRT78'	protein_coding
12	52880958	53298580	-	ENSG00000170477	FANTOM5	'KRT4'	protein_coding
12	53266488	53267995	-	CATG00000012003	FANTOM5	'CATG00000012003.1'	noncoding_lncRNA_intergenic
12	53218090	53300496	-	ENSG00000170423	FANTOM5	'KRT78'	protein_coding
12	52880958	53298580	-	ENSG00000170477	FANTOM5	'KRT4'	protein_coding
12	53218090	53300496	-	ENSG00000170423	FANTOM5	'KRT78'	protein_coding
12	52880958	53298580	-	ENSG00000170477	FANTOM5	'KRT4'	protein_coding
12	53218090	53300496	-	ENSG00000170423	FANTOM5	'KRT78'	protein_coding
12	52880958	53298580	-	ENSG00000170477	FANTOM5	'KRT4'	protein_coding
12	53218090	53300496	-	ENSG00000170423	FANTOM5	'KRT78'	protein_coding
12	52880958	53298580	-	ENSG00000170477	FANTOM5	'KRT4'	protein_coding
12	53218090	53300496	-	ENSG00000170423	FANTOM5	'KRT78'	protein_coding
12	52880958	53298580	-	ENSG00000170477	FANTOM5	'KRT4'	protein_coding
12	53218090	53300496	-	ENSG00000170423	FANTOM5	'KRT78'	protein_coding
12	52880958	53298580	-	ENSG00000170477	FANTOM5	'KRT4'	protein_coding
12	53218090	53300496	-	ENSG00000170423	FANTOM5	'KRT78'	protein_coding
12	52880958	53298580	-	ENSG00000170477	FANTOM5	'KRT4'	protein_coding
12	53272460	53273284	-	CATG00000012005	FANTOM5	'CATG00000012005.1'	noncoding_lncRNA_intergenic
12	53218090	53300496	-	ENSG00000170423	FANTOM5	'KRT78'	protein_coding
12	52880958	53298580	-	ENSG00000170477	FANTOM5	'KRT4'	protein_coding
12	53272460	53273284	-	CATG00000012005	FANTOM5	'CATG00000012005.1'	noncoding_lncRNA_intergenic
12	53218090	53300496	-	ENSG00000170423	FANTOM5	'KRT78'	protein_coding
12	52880958	53298580	-	ENSG00000170477	FANTOM5	'KRT4'	protein_coding
12	53272460	53273284	-	CATG00000012005	FANTOM5	'CATG00000012005.1'	noncoding_lncRNA_intergenic
12	53218090	53300496	-	ENSG00000170423	FANTOM5	'KRT78'	protein_coding
12	52880958	53298580	-	ENSG00000170477	FANTOM5	'KRT4'	protein_coding
12	53218090	53300496	-	ENSG00000170423	FANTOM5	'KRT78'	protein_coding
12	52880958	53298580	-	ENSG00000170477	FANTOM5	'KRT4'	protein_coding
12	53218090	53300496	-	ENSG00000170423	FANTOM5	'KRT78'	protein_coding
12	52880958	53298580	-	ENSG00000170477	FANTOM5	'KRT4'	protein_coding
12	53218090	53300496	-	ENSG00000170423	FANTOM5	'KRT78'	protein_coding
12	52880958	53298580	-	ENSG00000170477	FANTOM5	'KRT4'	protein_coding
12	53218090	53300496	-	ENSG00000170423	FANTOM5	'KRT78'	protein_coding
12	52880958	53298580	-	ENSG00000170477	FANTOM5	'KRT4'	protein_coding
12	53218090	53300496	-	ENSG00000170423	FANTOM5	'KRT78'	protein_coding
12	52880958	53298580	-	ENSG00000170477	FANTOM5	'KRT4'	protein_coding
12	53218090	53300496	-	ENSG00000170423	FANTOM5	'KRT78'	protein_coding
12	52880958	53298580	-	ENSG00000170477	FANTOM5	'KRT4'	protein_coding
12	53218090	53300496	-	ENSG00000170423	FANTOM5	'KRT78'	protein_coding
12	52880958	53298580	-	ENSG00000170477	FANTOM5	'KRT4'	protein_coding
12	53218090	53300496	-	ENSG00000170423	FANTOM5	'KRT78'	protein_coding
12	52880958	53298580	-	ENSG00000170477	FANTOM5	'KRT4'	protein_coding
12	53218090	53300496	-	ENSG00000170423	FANTOM5	'KRT78'	protein_coding
12	52880958	53298580	-	ENSG00000170477	FANTOM5	'KRT4'	protein_coding
12	53218090	53300496	-	ENSG00000170423	FANTOM5	'KRT78'	protein_coding
12	52880958	53298580	-	ENSG00000170477	FANTOM5	'KRT4'	protein_coding
12	53218090	53300496	-	ENSG00000170423	FANTOM5	'KRT78'	protein_coding
12	52880958	53298580	-	ENSG00000170477	FANTOM5	'KRT4'	protein_coding
12	53218090	53300496	-	ENSG00000170423	FANTOM5	'KRT78'	protein_coding
12	52880958	53298580	-	ENSG00000170477	FANTOM5	'KRT4'	protein_coding
12	53218090	53300496	-	ENSG00000170423	FANTOM5	'KRT78'	protein_coding
12	52880958	53298580	-	ENSG00000170477	FANTOM5	'KRT4'	protein_coding
12	53218090	53300496	-	ENSG00000170423	FANTOM5	'KRT78'	protein_coding
12	52880958	53298580	-	ENSG00000170477	FANTOM5	'KRT4'	protein_coding
12	53218090	53300496	-	ENSG00000170423	FANTOM5	'KRT78'	protein_coding
12	52880958	53298580	-	ENSG00000170477	FANTOM5	'KRT4'	protein_coding
12	53218090	53300496	-	ENSG00000170423	FANTOM5	'KRT78'	protein_coding
12	52880958	53298580	-	ENSG00000170477	FANTOM5	'KRT4'	protein_coding
12	53218090	53300496	-	ENSG00000170423	FANTOM5	'KRT78'	protein_coding
12	52880958	53298580	-	ENSG00000170477	FANTOM5	'KRT4'	protein_coding
12	53218090	53300496	-	ENSG00000170423	FANTOM5	'KRT78'	protein_coding
12	52880958	53298580	-	ENSG00000170477	FANTOM5	'KRT4'	protein_coding
12	53218090	53300496	-	ENSG00000170423	FANTOM5	'KRT78'	protein_coding
12	52880958	53298580	-	ENSG00000170477	FANTOM5	'KRT4'	protein_coding
12	53218090	53300496	-	ENSG00000170423	FANTOM5	'KRT78'	protein_coding
12	52880958	53298580	-	ENSG00000170477	FANTOM5	'KRT4'	protein_coding
12	53279143	53280169	+	ENSG00000241146	FANTOM5	'RPL7P41'	noncoding_pseudogene
12	53218090	53300496	-	ENSG00000170423	FANTOM5	'KRT78'	protein_coding
12	52880958	53298580	-	ENSG00000170477	FANTOM5	'KRT4'	protein_coding
12	53218090	53300496	-	ENSG00000170423	FANTOM5	'KRT78'	protein_coding
12	52880958	53298580	-	ENSG00000170477	FANTOM5	'KRT4'	protein_coding
12	53218090	53300496	-	ENSG00000170423	FANTOM5	'KRT78'	protein_coding
12	52880958	53298580	-	ENSG00000170477	FANTOM5	'KRT4'	protein_coding
12	53218090	53300496	-	ENSG00000170423	FANTOM5	'KRT78'	protein_coding
12	52880958	53298580	-	ENSG00000170477	FANTOM5	'KRT4'	protein_coding
12	53218090	53300496	-	ENSG00000170423	FANTOM5	'KRT78'	protein_coding
12	52880958	53298580	-	ENSG00000170477	FANTOM5	'KRT4'	protein_coding
12	53218090	53300496	-	ENSG00000170423	FANTOM5	'KRT78'	protein_coding
12	52880958	53298580	-	ENSG00000170477	FANTOM5	'KRT4'	protein_coding
12	53218090	53300496	-	ENSG00000170423	FANTOM5	'KRT78'	protein_coding
12	53285904	53344642	-	ENSG00000170421	FANTOM5	'KRT8'	protein_coding
12	52880958	53298580	-	ENSG00000170477	FANTOM5	'KRT4'	protein_coding
12	53218090	53300496	-	ENSG00000170423	FANTOM5	'KRT78'	protein_coding
12	53285904	53344642	-	ENSG00000170421	FANTOM5	'KRT8'	protein_coding
12	52880958	53298580	-	ENSG00000170477	FANTOM5	'KRT4'	protein_coding
12	53218090	53300496	-	ENSG00000170423	FANTOM5	'KRT78'	protein_coding
12	53285904	53344642	-	ENSG00000170421	FANTOM5	'KRT8'	protein_coding
12	52880958	53298580	-	ENSG00000170477	FANTOM5	'KRT4'	protein_coding
12	53298547	53301061	+	CATG00000009007	FANTOM5	'CATG00000009007.1'	noncoding_lncRNA_divergent
12	53218090	53300496	-	ENSG00000170423	FANTOM5	'KRT78'	protein_coding
12	53285904	53344642	-	ENSG00000170421	FANTOM5	'KRT8'	protein_coding
12	53298547	53301061	+	CATG00000009007	FANTOM5	'CATG00000009007.1'	noncoding_lncRNA_divergent
12	53285904	53344642	-	ENSG00000170421	FANTOM5	'KRT8'	protein_coding
12	53285904	53344642	-	ENSG00000170421	FANTOM5	'KRT8'	protein_coding
12	53285904	53344642	-	ENSG00000170421	FANTOM5	'KRT8'	protein_coding
12	53285904	53344642	-	ENSG00000170421	FANTOM5	'KRT8'	protein_coding
12	53285904	53344642	-	ENSG00000170421	FANTOM5	'KRT8'	protein_coding
12	53285904	53344642	-	ENSG00000170421	FANTOM5	'KRT8'	protein_coding
14	53196903	53397067	+	ENSG00000198252	FANTOM5	'STYX'	protein_coding
14	53104820	53620034	-	ENSG00000100523	FANTOM5	'DDHD1'	protein_coding
14	53196903	53397067	+	ENSG00000198252	FANTOM5	'STYX'	protein_coding
14	53104820	53620034	-	ENSG00000100523	FANTOM5	'DDHD1'	protein_coding
14	53196903	53397067	+	ENSG00000198252	FANTOM5	'STYX'	protein_coding
14	53104820	53620034	-	ENSG00000100523	FANTOM5	'DDHD1'	protein_coding
14	53196903	53397067	+	ENSG00000198252	FANTOM5	'STYX'	protein_coding
14	53104820	53620034	-	ENSG00000100523	FANTOM5	'DDHD1'	protein_coding
14	53196903	53397067	+	ENSG00000198252	FANTOM5	'STYX'	protein_coding
14	53104820	53620034	-	ENSG00000100523	FANTOM5	'DDHD1'	protein_coding
14	53196903	53397067	+	ENSG00000198252	FANTOM5	'STYX'	protein_coding
14	53104820	53620034	-	ENSG00000100523	FANTOM5	'DDHD1'	protein_coding
14	53196903	53397067	+	ENSG00000198252	FANTOM5	'STYX'	protein_coding
14	53323007	53419137	-	ENSG00000073712	FANTOM5	'FERMT2'	protein_coding
14	53104820	53620034	-	ENSG00000100523	FANTOM5	'DDHD1'	protein_coding
14	53196903	53397067	+	ENSG00000198252	FANTOM5	'STYX'	protein_coding
14	53323007	53419137	-	ENSG00000073712	FANTOM5	'FERMT2'	protein_coding
14	53104820	53620034	-	ENSG00000100523	FANTOM5	'DDHD1'	protein_coding
14	53196903	53397067	+	ENSG00000198252	FANTOM5	'STYX'	protein_coding
14	53323007	53419137	-	ENSG00000073712	FANTOM5	'FERMT2'	protein_coding
14	53104820	53620034	-	ENSG00000100523	FANTOM5	'DDHD1'	protein_coding
14	53196903	53397067	+	ENSG00000198252	FANTOM5	'STYX'	protein_coding
14	53323007	53419137	-	ENSG00000073712	FANTOM5	'FERMT2'	protein_coding
14	53104820	53620034	-	ENSG00000100523	FANTOM5	'DDHD1'	protein_coding
14	53196903	53397067	+	ENSG00000198252	FANTOM5	'STYX'	protein_coding
14	53323007	53419137	-	ENSG00000073712	FANTOM5	'FERMT2'	protein_coding
14	53104820	53620034	-	ENSG00000100523	FANTOM5	'DDHD1'	protein_coding
14	53196903	53397067	+	ENSG00000198252	FANTOM5	'STYX'	protein_coding
14	53323007	53419137	-	ENSG00000073712	FANTOM5	'FERMT2'	protein_coding
14	53104820	53620034	-	ENSG00000100523	FANTOM5	'DDHD1'	protein_coding
14	53196903	53397067	+	ENSG00000198252	FANTOM5	'STYX'	protein_coding
14	53323007	53419137	-	ENSG00000073712	FANTOM5	'FERMT2'	protein_coding
14	53104820	53620034	-	ENSG00000100523	FANTOM5	'DDHD1'	protein_coding
14	53196903	53397067	+	ENSG00000198252	FANTOM5	'STYX'	protein_coding
14	53323007	53419137	-	ENSG00000073712	FANTOM5	'FERMT2'	protein_coding
14	53104820	53620034	-	ENSG00000100523	FANTOM5	'DDHD1'	protein_coding
14	53196903	53397067	+	ENSG00000198252	FANTOM5	'STYX'	protein_coding
14	53323007	53419137	-	ENSG00000073712	FANTOM5	'FERMT2'	protein_coding
14	53104820	53620034	-	ENSG00000100523	FANTOM5	'DDHD1'	protein_coding
14	53196903	53397067	+	ENSG00000198252	FANTOM5	'STYX'	protein_coding
14	53323007	53419137	-	ENSG00000073712	FANTOM5	'FERMT2'	protein_coding
14	53104820	53620034	-	ENSG00000100523	FANTOM5	'DDHD1'	protein_coding
14	53196903	53397067	+	ENSG00000198252	FANTOM5	'STYX'	protein_coding
14	53323007	53419137	-	ENSG00000073712	FANTOM5	'FERMT2'	protein_coding
14	53104820	53620034	-	ENSG00000100523	FANTOM5	'DDHD1'	protein_coding
14	53196903	53397067	+	ENSG00000198252	FANTOM5	'STYX'	protein_coding
14	53323007	53419137	-	ENSG00000073712	FANTOM5	'FERMT2'	protein_coding
14	53104820	53620034	-	ENSG00000100523	FANTOM5	'DDHD1'	protein_coding
14	53196903	53397067	+	ENSG00000198252	FANTOM5	'STYX'	protein_coding
14	53323007	53419137	-	ENSG00000073712	FANTOM5	'FERMT2'	protein_coding
14	53104820	53620034	-	ENSG00000100523	FANTOM5	'DDHD1'	protein_coding
14	53196903	53397067	+	ENSG00000198252	FANTOM5	'STYX'	protein_coding
14	53323007	53419137	-	ENSG00000073712	FANTOM5	'FERMT2'	protein_coding
14	53104820	53620034	-	ENSG00000100523	FANTOM5	'DDHD1'	protein_coding
14	53196903	53397067	+	ENSG00000198252	FANTOM5	'STYX'	protein_coding
14	53323007	53419137	-	ENSG00000073712	FANTOM5	'FERMT2'	protein_coding
14	53104820	53620034	-	ENSG00000100523	FANTOM5	'DDHD1'	protein_coding
14	53196903	53397067	+	ENSG00000198252	FANTOM5	'STYX'	protein_coding
14	53323007	53419137	-	ENSG00000073712	FANTOM5	'FERMT2'	protein_coding
14	53104820	53620034	-	ENSG00000100523	FANTOM5	'DDHD1'	protein_coding
14	53196903	53397067	+	ENSG00000198252	FANTOM5	'STYX'	protein_coding
14	53323007	53419137	-	ENSG00000073712	FANTOM5	'FERMT2'	protein_coding
14	53104820	53620034	-	ENSG00000100523	FANTOM5	'DDHD1'	protein_coding
14	53196903	53397067	+	ENSG00000198252	FANTOM5	'STYX'	protein_coding
14	53323007	53419137	-	ENSG00000073712	FANTOM5	'FERMT2'	protein_coding
14	53104820	53620034	-	ENSG00000100523	FANTOM5	'DDHD1'	protein_coding
14	53196903	53397067	+	ENSG00000198252	FANTOM5	'STYX'	protein_coding
14	53323007	53419137	-	ENSG00000073712	FANTOM5	'FERMT2'	protein_coding
14	53104820	53620034	-	ENSG00000100523	FANTOM5	'DDHD1'	protein_coding
14	53196903	53397067	+	ENSG00000198252	FANTOM5	'STYX'	protein_coding
14	53323007	53419137	-	ENSG00000073712	FANTOM5	'FERMT2'	protein_coding
14	53104820	53620034	-	ENSG00000100523	FANTOM5	'DDHD1'	protein_coding
14	53196903	53397067	+	ENSG00000198252	FANTOM5	'STYX'	protein_coding
14	53323007	53419137	-	ENSG00000073712	FANTOM5	'FERMT2'	protein_coding
14	53104820	53620034	-	ENSG00000100523	FANTOM5	'DDHD1'	protein_coding
14	53196903	53397067	+	ENSG00000198252	FANTOM5	'STYX'	protein_coding
14	53323007	53419137	-	ENSG00000073712	FANTOM5	'FERMT2'	protein_coding
14	53104820	53620034	-	ENSG00000100523	FANTOM5	'DDHD1'	protein_coding
14	53196903	53397067	+	ENSG00000198252	FANTOM5	'STYX'	protein_coding
14	53323007	53419137	-	ENSG00000073712	FANTOM5	'FERMT2'	protein_coding
14	53104820	53620034	-	ENSG00000100523	FANTOM5	'DDHD1'	protein_coding
14	53196903	53397067	+	ENSG00000198252	FANTOM5	'STYX'	protein_coding
14	53323007	53419137	-	ENSG00000073712	FANTOM5	'FERMT2'	protein_coding
14	53104820	53620034	-	ENSG00000100523	FANTOM5	'DDHD1'	protein_coding
14	68283476	69197316	+	ENSG00000182185	FANTOM5	'RAD51B'	protein_coding
14	68979885	69162599	-	ENSG00000258623	FANTOM5	'CTD-2325P2.3'	noncoding_lncRNA_noncoding_antisense
14	69073000	69150162	-	ENSG00000259038	FANTOM5	'CTD-2325P2.4'	noncoding_lncRNA_noncoding_antisense
14	68283476	69197316	+	ENSG00000182185	FANTOM5	'RAD51B'	protein_coding
14	68979885	69162599	-	ENSG00000258623	FANTOM5	'CTD-2325P2.3'	noncoding_lncRNA_noncoding_antisense
14	69073000	69150162	-	ENSG00000259038	FANTOM5	'CTD-2325P2.4'	noncoding_lncRNA_noncoding_antisense
17	36042992	36105050	-	ENSG00000108753	FANTOM5	'HNF1B'	protein_coding
17	36042992	36105050	-	ENSG00000108753	FANTOM5	'HNF1B'	protein_coding
17	36042992	36105050	-	ENSG00000108753	FANTOM5	'HNF1B'	protein_coding
17	36042992	36105050	-	ENSG00000108753	FANTOM5	'HNF1B'	protein_coding
17	36042992	36105050	-	ENSG00000108753	FANTOM5	'HNF1B'	protein_coding
17	36042992	36105050	-	ENSG00000108753	FANTOM5	'HNF1B'	protein_coding
17	36042992	36105050	-	ENSG00000108753	FANTOM5	'HNF1B'	protein_coding
17	36042992	36105050	-	ENSG00000108753	FANTOM5	'HNF1B'	protein_coding
17	36042992	36105050	-	ENSG00000108753	FANTOM5	'HNF1B'	protein_coding
17	36042992	36105050	-	ENSG00000108753	FANTOM5	'HNF1B'	protein_coding
17	36042992	36105050	-	ENSG00000108753	FANTOM5	'HNF1B'	protein_coding
17	36042992	36105050	-	ENSG00000108753	FANTOM5	'HNF1B'	protein_coding
17	47325600	47336024	+	ENSG00000177369	FANTOM5	'RP1-62O9.3'	noncoding_lncRNA_intergenic
17	47325600	47336024	+	ENSG00000177369	FANTOM5	'RP1-62O9.3'	noncoding_lncRNA_intergenic
17	47325600	47336024	+	ENSG00000177369	FANTOM5	'RP1-62O9.3'	noncoding_lncRNA_intergenic
17	47325600	47336024	+	ENSG00000177369	FANTOM5	'RP1-62O9.3'	noncoding_lncRNA_intergenic
17	47336625	47338087	-	CATG00000033899	FANTOM5	'CATG00000033899.1'	noncoding_lncRNA_intergenic
17	47365468	47439818	-	ENSG00000198740	FANTOM5	'ZNF652'	protein_coding
17	47365468	47439818	-	ENSG00000198740	FANTOM5	'ZNF652'	protein_coding
17	47365468	47439818	-	ENSG00000198740	FANTOM5	'ZNF652'	protein_coding
17	47365468	47439818	-	ENSG00000198740	FANTOM5	'ZNF652'	protein_coding
17	47365468	47439818	-	ENSG00000198740	FANTOM5	'ZNF652'	protein_coding
17	47365468	47439818	-	ENSG00000198740	FANTOM5	'ZNF652'	protein_coding
17	47365468	47439818	-	ENSG00000198740	FANTOM5	'ZNF652'	protein_coding
17	47365468	47439818	-	ENSG00000198740	FANTOM5	'ZNF652'	protein_coding
17	47365468	47439818	-	ENSG00000198740	FANTOM5	'ZNF652'	protein_coding
17	47365468	47439818	-	ENSG00000198740	FANTOM5	'ZNF652'	protein_coding
17	47365468	47439818	-	ENSG00000198740	FANTOM5	'ZNF652'	protein_coding
17	47365468	47439818	-	ENSG00000198740	FANTOM5	'ZNF652'	protein_coding
17	47365468	47439818	-	ENSG00000198740	FANTOM5	'ZNF652'	protein_coding
17	47365468	47439818	-	ENSG00000198740	FANTOM5	'ZNF652'	protein_coding
17	47365468	47439818	-	ENSG00000198740	FANTOM5	'ZNF652'	protein_coding
17	47365468	47439818	-	ENSG00000198740	FANTOM5	'ZNF652'	protein_coding
17	47365468	47439818	-	ENSG00000198740	FANTOM5	'ZNF652'	protein_coding
17	47365468	47439818	-	ENSG00000198740	FANTOM5	'ZNF652'	protein_coding
17	47365468	47439818	-	ENSG00000198740	FANTOM5	'ZNF652'	protein_coding
17	47365468	47439818	-	ENSG00000198740	FANTOM5	'ZNF652'	protein_coding
17	47365468	47439818	-	ENSG00000198740	FANTOM5	'ZNF652'	protein_coding
17	47365468	47439818	-	ENSG00000198740	FANTOM5	'ZNF652'	protein_coding
17	47365468	47439818	-	ENSG00000198740	FANTOM5	'ZNF652'	protein_coding
17	47365468	47439818	-	ENSG00000198740	FANTOM5	'ZNF652'	protein_coding
17	47365468	47439818	-	ENSG00000198740	FANTOM5	'ZNF652'	protein_coding
17	47365468	47439818	-	ENSG00000198740	FANTOM5	'ZNF652'	protein_coding
17	47365468	47439818	-	ENSG00000198740	FANTOM5	'ZNF652'	protein_coding
17	47365468	47439818	-	ENSG00000198740	FANTOM5	'ZNF652'	protein_coding
17	47365468	47439818	-	ENSG00000198740	FANTOM5	'ZNF652'	protein_coding
17	47365468	47439818	-	ENSG00000198740	FANTOM5	'ZNF652'	protein_coding
17	47365468	47439818	-	ENSG00000198740	FANTOM5	'ZNF652'	protein_coding
17	47365468	47439818	-	ENSG00000198740	FANTOM5	'ZNF652'	protein_coding
17	47438523	47462138	+	ENSG00000248714	FANTOM5	'RP11-1079K10.3'	noncoding_lncRNA_divergent
17	47438523	47462138	+	ENSG00000248714	FANTOM5	'RP11-1079K10.3'	noncoding_lncRNA_divergent
17	47438523	47462138	+	ENSG00000248714	FANTOM5	'RP11-1079K10.3'	noncoding_lncRNA_divergent
17	47438523	47462138	+	ENSG00000248714	FANTOM5	'RP11-1079K10.3'	noncoding_lncRNA_divergent
17	47438523	47462138	+	ENSG00000248714	FANTOM5	'RP11-1079K10.3'	noncoding_lncRNA_divergent
17	47448102	47554350	+	ENSG00000262039	Ensembl	'RP11-81K2.1'	protein_coding
17	47438523	47462138	+	ENSG00000248714	FANTOM5	'RP11-1079K10.3'	noncoding_lncRNA_divergent
17	47448102	47554350	+	ENSG00000262039	Ensembl	'RP11-81K2.1'	protein_coding
17	47438523	47462138	+	ENSG00000248714	FANTOM5	'RP11-1079K10.3'	noncoding_lncRNA_divergent
17	47448102	47554350	+	ENSG00000262039	Ensembl	'RP11-81K2.1'	protein_coding
17	47438523	47462138	+	ENSG00000248714	FANTOM5	'RP11-1079K10.3'	noncoding_lncRNA_divergent
17	47452742	47457456	+	ENSG00000250948	Ensembl	'RP11-1079K10.2'	noncoding_antisense
17	47448102	47554350	+	ENSG00000262039	Ensembl	'RP11-81K2.1'	protein_coding
17	47438523	47462138	+	ENSG00000248714	FANTOM5	'RP11-1079K10.3'	noncoding_lncRNA_divergent
17	47452742	47457456	+	ENSG00000250948	Ensembl	'RP11-1079K10.2'	noncoding_antisense
17	47448102	47554350	+	ENSG00000262039	Ensembl	'RP11-81K2.1'	protein_coding
17	47438523	47462138	+	ENSG00000248714	FANTOM5	'RP11-1079K10.3'	noncoding_lncRNA_divergent
17	47452742	47457456	+	ENSG00000250948	Ensembl	'RP11-1079K10.2'	noncoding_antisense
17	47448102	47554350	+	ENSG00000262039	Ensembl	'RP11-81K2.1'	protein_coding
17	47438523	47462138	+	ENSG00000248714	FANTOM5	'RP11-1079K10.3'	noncoding_lncRNA_divergent
17	47452742	47457456	+	ENSG00000250948	Ensembl	'RP11-1079K10.2'	noncoding_antisense
17	47448102	47554350	+	ENSG00000262039	Ensembl	'RP11-81K2.1'	protein_coding
17	47438523	47462138	+	ENSG00000248714	FANTOM5	'RP11-1079K10.3'	noncoding_lncRNA_divergent
17	47452742	47457456	+	ENSG00000250948	Ensembl	'RP11-1079K10.2'	noncoding_antisense
17	47448102	47554350	+	ENSG00000262039	Ensembl	'RP11-81K2.1'	protein_coding
17	47438523	47462138	+	ENSG00000248714	FANTOM5	'RP11-1079K10.3'	noncoding_lncRNA_divergent
17	47448102	47554350	+	ENSG00000262039	Ensembl	'RP11-81K2.1'	protein_coding
17	47438523	47462138	+	ENSG00000248714	FANTOM5	'RP11-1079K10.3'	noncoding_lncRNA_divergent
17	406508	635585	-	ENSG00000141252	FANTOM5	'VPS53'	protein_coding
17	406508	635585	-	ENSG00000141252	FANTOM5	'VPS53'	protein_coding
17	406508	635585	-	ENSG00000141252	FANTOM5	'VPS53'	protein_coding
17	406508	635585	-	ENSG00000141252	FANTOM5	'VPS53'	protein_coding
17	406508	635585	-	ENSG00000141252	FANTOM5	'VPS53'	protein_coding
17	406508	635585	-	ENSG00000141252	FANTOM5	'VPS53'	protein_coding
17	406508	635585	-	ENSG00000141252	FANTOM5	'VPS53'	protein_coding
17	406508	635585	-	ENSG00000141252	FANTOM5	'VPS53'	protein_coding
17	406508	635585	-	ENSG00000141252	FANTOM5	'VPS53'	protein_coding
17	406508	635585	-	ENSG00000141252	FANTOM5	'VPS53'	protein_coding
17	406508	635585	-	ENSG00000141252	FANTOM5	'VPS53'	protein_coding
17	406508	635585	-	ENSG00000141252	FANTOM5	'VPS53'	protein_coding
17	406508	635585	-	ENSG00000141252	FANTOM5	'VPS53'	protein_coding
17	406508	635585	-	ENSG00000141252	FANTOM5	'VPS53'	protein_coding
17	618139	664074	+	ENSG00000167695	FANTOM5	'FAM57A'	protein_coding
17	406508	635585	-	ENSG00000141252	FANTOM5	'VPS53'	protein_coding
17	618139	664074	+	ENSG00000167695	FANTOM5	'FAM57A'	protein_coding
17	406508	635585	-	ENSG00000141252	FANTOM5	'VPS53'	protein_coding
17	618139	664074	+	ENSG00000167695	FANTOM5	'FAM57A'	protein_coding
17	406508	635585	-	ENSG00000141252	FANTOM5	'VPS53'	protein_coding
17	618139	664074	+	ENSG00000167695	FANTOM5	'FAM57A'	protein_coding
17	619291	884362	-	ENSG00000167693	FANTOM5	'NXN'	protein_coding
17	406508	635585	-	ENSG00000141252	FANTOM5	'VPS53'	protein_coding
17	618139	664074	+	ENSG00000167695	FANTOM5	'FAM57A'	protein_coding
17	619291	884362	-	ENSG00000167693	FANTOM5	'NXN'	protein_coding
17	406508	635585	-	ENSG00000141252	FANTOM5	'VPS53'	protein_coding
17	618139	664074	+	ENSG00000167695	FANTOM5	'FAM57A'	protein_coding
17	619291	884362	-	ENSG00000167693	FANTOM5	'NXN'	protein_coding
17	406508	635585	-	ENSG00000141252	FANTOM5	'VPS53'	protein_coding
17	618139	664074	+	ENSG00000167695	FANTOM5	'FAM57A'	protein_coding
17	619291	884362	-	ENSG00000167693	FANTOM5	'NXN'	protein_coding
17	406508	635585	-	ENSG00000141252	FANTOM5	'VPS53'	protein_coding
17	618139	664074	+	ENSG00000167695	FANTOM5	'FAM57A'	protein_coding
17	619291	884362	-	ENSG00000167693	FANTOM5	'NXN'	protein_coding
17	69077408	69105963	+	CATG00000032314	FANTOM5	'CATG00000032314.1'	noncoding_lncRNA_intergenic
17	68608010	69739611	-	ENSG00000260785	FANTOM5	'CASC17'	noncoding_lncRNA_intergenic
17	68608010	69739611	-	ENSG00000260785	FANTOM5	'CASC17'	noncoding_lncRNA_intergenic
17	68608010	69739611	-	ENSG00000260785	FANTOM5	'CASC17'	noncoding_lncRNA_intergenic
17	68608010	69739611	-	ENSG00000260785	FANTOM5	'CASC17'	noncoding_lncRNA_intergenic
17	68608010	69739611	-	ENSG00000260785	FANTOM5	'CASC17'	noncoding_lncRNA_intergenic
17	68608010	69739611	-	ENSG00000260785	FANTOM5	'CASC17'	noncoding_lncRNA_intergenic
17	68608010	69739611	-	ENSG00000260785	FANTOM5	'CASC17'	noncoding_lncRNA_intergenic
17	68608010	69739611	-	ENSG00000260785	FANTOM5	'CASC17'	noncoding_lncRNA_intergenic
17	68608010	69739611	-	ENSG00000260785	FANTOM5	'CASC17'	noncoding_lncRNA_intergenic
17	68608010	69739611	-	ENSG00000260785	FANTOM5	'CASC17'	noncoding_lncRNA_intergenic
17	68608010	69739611	-	ENSG00000260785	FANTOM5	'CASC17'	noncoding_lncRNA_intergenic
17	68608010	69739611	-	ENSG00000260785	FANTOM5	'CASC17'	noncoding_lncRNA_intergenic
17	68608010	69739611	-	ENSG00000260785	FANTOM5	'CASC17'	noncoding_lncRNA_intergenic
17	68608010	69739611	-	ENSG00000260785	FANTOM5	'CASC17'	noncoding_lncRNA_intergenic
17	68608010	69739611	-	ENSG00000260785	FANTOM5	'CASC17'	noncoding_lncRNA_intergenic
17	68608010	69739611	-	ENSG00000260785	FANTOM5	'CASC17'	noncoding_lncRNA_intergenic
17	68608010	69739611	-	ENSG00000260785	FANTOM5	'CASC17'	noncoding_lncRNA_intergenic
17	68608010	69739611	-	ENSG00000260785	FANTOM5	'CASC17'	noncoding_lncRNA_intergenic
17	68608010	69739611	-	ENSG00000260785	FANTOM5	'CASC17'	noncoding_lncRNA_intergenic
17	68608010	69739611	-	ENSG00000260785	FANTOM5	'CASC17'	noncoding_lncRNA_intergenic
17	68608010	69739611	-	ENSG00000260785	FANTOM5	'CASC17'	noncoding_lncRNA_intergenic
17	68608010	69739611	-	ENSG00000260785	FANTOM5	'CASC17'	noncoding_lncRNA_intergenic
17	68608010	69739611	-	ENSG00000260785	FANTOM5	'CASC17'	noncoding_lncRNA_intergenic
17	68608010	69739611	-	ENSG00000260785	FANTOM5	'CASC17'	noncoding_lncRNA_intergenic
17	68608010	69739611	-	ENSG00000260785	FANTOM5	'CASC17'	noncoding_lncRNA_intergenic
17	68608010	69739611	-	ENSG00000260785	FANTOM5	'CASC17'	noncoding_lncRNA_intergenic
18	76739432	76767876	+	ENSG00000256463	FANTOM5	'SALL3'	protein_coding
18	76739432	76767876	+	ENSG00000256463	FANTOM5	'SALL3'	protein_coding
19	54717672	54804249	-	ENSG00000204577	FANTOM5	'LILRB3'	protein_coding
19	54740471	54804735	-	ENSG00000131042	FANTOM5	'LILRB2'	protein_coding
19	54740471	54850433	-	ENSG00000248166	FANTOM5	'AC008984.2'	noncoding_lncRNA_intergenic
19	54745513	54824417	-	ENSG00000187116	FANTOM5	'LILRA5'	protein_coding
19	54782731	54823893	-	ENSG00000170866	FANTOM5	'LILRA3'	protein_coding
19	54717672	54804249	-	ENSG00000204577	FANTOM5	'LILRB3'	protein_coding
19	54740471	54804735	-	ENSG00000131042	FANTOM5	'LILRB2'	protein_coding
19	54740471	54850433	-	ENSG00000248166	FANTOM5	'AC008984.2'	noncoding_lncRNA_intergenic
19	54745513	54824417	-	ENSG00000187116	FANTOM5	'LILRA5'	protein_coding
19	54782731	54823893	-	ENSG00000170866	FANTOM5	'LILRA3'	protein_coding
19	54717672	54804249	-	ENSG00000204577	FANTOM5	'LILRB3'	protein_coding
19	54740471	54804735	-	ENSG00000131042	FANTOM5	'LILRB2'	protein_coding
19	54740471	54850433	-	ENSG00000248166	FANTOM5	'AC008984.2'	noncoding_lncRNA_intergenic
19	54745513	54824417	-	ENSG00000187116	FANTOM5	'LILRA5'	protein_coding
19	54782731	54823893	-	ENSG00000170866	FANTOM5	'LILRA3'	protein_coding
19	54717672	54804249	-	ENSG00000204577	FANTOM5	'LILRB3'	protein_coding
19	54740471	54804735	-	ENSG00000131042	FANTOM5	'LILRB2'	protein_coding
19	54740471	54850433	-	ENSG00000248166	FANTOM5	'AC008984.2'	noncoding_lncRNA_intergenic
19	54745513	54824417	-	ENSG00000187116	FANTOM5	'LILRA5'	protein_coding
19	54782731	54823893	-	ENSG00000170866	FANTOM5	'LILRA3'	protein_coding
19	54717672	54804249	-	ENSG00000204577	FANTOM5	'LILRB3'	protein_coding
19	54740471	54804735	-	ENSG00000131042	FANTOM5	'LILRB2'	protein_coding
19	54740471	54850433	-	ENSG00000248166	FANTOM5	'AC008984.2'	noncoding_lncRNA_intergenic
19	54745513	54824417	-	ENSG00000187116	FANTOM5	'LILRA5'	protein_coding
19	54782731	54823893	-	ENSG00000170866	FANTOM5	'LILRA3'	protein_coding
19	54717672	54804249	-	ENSG00000204577	FANTOM5	'LILRB3'	protein_coding
19	54740471	54804735	-	ENSG00000131042	FANTOM5	'LILRB2'	protein_coding
19	54740471	54850433	-	ENSG00000248166	FANTOM5	'AC008984.2'	noncoding_lncRNA_intergenic
19	54745513	54824417	-	ENSG00000187116	FANTOM5	'LILRA5'	protein_coding
19	54782731	54823893	-	ENSG00000170866	FANTOM5	'LILRA3'	protein_coding
19	54717672	54804249	-	ENSG00000204577	FANTOM5	'LILRB3'	protein_coding
19	54740471	54804735	-	ENSG00000131042	FANTOM5	'LILRB2'	protein_coding
19	54740471	54850433	-	ENSG00000248166	FANTOM5	'AC008984.2'	noncoding_lncRNA_intergenic
19	54745513	54824417	-	ENSG00000187116	FANTOM5	'LILRA5'	protein_coding
19	54782731	54823893	-	ENSG00000170866	FANTOM5	'LILRA3'	protein_coding
19	54717672	54804249	-	ENSG00000204577	FANTOM5	'LILRB3'	protein_coding
19	54740471	54804735	-	ENSG00000131042	FANTOM5	'LILRB2'	protein_coding
[truncated: 310 more rows]

## Sheet: Supplementary Table 2b
Supplementary Table 2b. List of identified Somatic-affected genes for PC
Chromosome	Start	End	Strand	GeneID	Project	GeneName	GeneClass
1	16267024	16302596	-	ENSG00000116809	FANTOM5	'ZBTB17'	protein_coding
1	87317732	87381008	-	ENSG00000183291	FANTOM5	'SEPT15'	protein_coding
1	172648780	173043198	+	ENSG00000224228	FANTOM5	'RP1-15D23.2'	noncoding_lncRNA_intergenic
2	201478592	201632316	-	ENSG00000237166	FANTOM5	'AC007163.3'	noncoding_lncRNA_noncoding_antisense
2	201560640	201629520	+	ENSG00000243478	FANTOM5	'AOX2P'	noncoding_pseudogene
3	47205706	47288974	+	ENSG00000227398	FANTOM5	'KIF9-AS1'	noncoding_lncRNA_divergent
3	47231598	47238095	+	CATG00000060022	FANTOM5	'CATG00000060022.1'	noncoding_lncRNA_noncoding_sense_intronic
3	85008142	86123705	+	ENSG00000175161	FANTOM5	'CADM2'	protein_coding
3	85008142	86123705	+	ENSG00000175161	FANTOM5	'CADM2'	protein_coding
3	125313934	125431910	+	CATG00000061635	FANTOM5	'CATG00000061635.1'	noncoding_lncRNA_divergent
3	194931855	195163820	-	ENSG00000114331	FANTOM5	'ACAP2'	protein_coding
4	42111494	42154718	-	ENSG00000188848	FANTOM5	'BEND4'	protein_coding
4	66535310	66574070	+	ENSG00000250846	FANTOM5	'RP11-807H7.1'	noncoding_lncRNA_divergent
5	12361077	12574877	-	ENSG00000248783	FANTOM5	'RP11-308B16.2'	noncoding_lncRNA_intergenic
5	91902877	92023933	-	ENSG00000249984	FANTOM5	'CTC-529L17.2'	noncoding_lncRNA_intergenic
5	91726222	92275453	-	ENSG00000249776	FANTOM5	'RP11-133F8.2'	noncoding_lncRNA_intergenic
5	91891646	92275453	-	ENSG00000248528	FANTOM5	'CTC-458G6.2'	noncoding_lncRNA_intergenic
5	162993839	163285261	+	CATG00000078399	FANTOM5	'CATG00000078399.1'	noncoding_lncRNA_divergent
6	73095347	73270789	-	CATG00000088851	FANTOM5	'CATG00000088851.1'	noncoding_lncRNA_intergenic
7	22137685	22767277	-	ENSG00000136237	FANTOM5	'RAPGEF5'	protein_coding
7	45500279	45588158	+	ENSG00000225537	FANTOM5	'AC073325.1'	noncoding_lncRNA_intergenic
7	48211055	48687255	+	ENSG00000179869	FANTOM5	'ABCA13'	protein_coding
8	5901875	6115058	-	ENSG00000253880	Ensembl	'RP11-124B13.1'	noncoding_lncRNA_lincRNA
8	91233728	91583033	+	ENSG00000253394	FANTOM5	'LINC00534'	noncoding_lncRNA_intergenic
8	91307681	91388079	-	CATG00000103157	FANTOM5	'CATG00000103157.1'	noncoding_lncRNA_intergenic
9	21437959	21591904	-	ENSG00000171889	FANTOM5	'MIR31HG'	noncoding_lncRNA_intergenic
9	86182615	86571920	-	ENSG00000165118	FANTOM5	'C9orf64'	protein_coding
12	18233632	18598834	-	ENSG00000111404	FANTOM5	'RERGL'	protein_coding
12	18395895	18899341	+	ENSG00000139144	FANTOM5	'PIK3C2G'	protein_coding
12	22778105	22850166	+	ENSG00000139163	FANTOM5	'ETNK1'	protein_coding
12	52880958	53298580	-	ENSG00000170477	FANTOM5	'KRT4'	protein_coding
12	52911708	53203262	+	CATG00000008985	FANTOM5	'CATG00000008985.1'	noncoding_short_ncRNA
12	75669759	75784681	-	ENSG00000180881	FANTOM5	'CAPS2'	protein_coding
12	87898236	88064299	-	CATG00000012708	FANTOM5	'CATG00000012708.1'	noncoding_lncRNA_intergenic
12	100660919	100741826	+	ENSG00000136021	FANTOM5	'SCYL2'	protein_coding
13	78960899	79177718	-	ENSG00000152192	FANTOM5	'POU4F1'	protein_coding
13	78493841	79207985	+	ENSG00000234377	FANTOM5	'RNF219-AS1'	noncoding_lncRNA_intergenic
14	35513565	35515356	-	CATG00000020709	FANTOM5	'CATG00000020709.1'	noncoding_lncRNA_divergent
14	35514354	35582336	+	ENSG00000151327	FANTOM5	'FAM177A1'	protein_coding
15	24407901	24415095	-	ENSG00000260551	Ensembl	'PWRN2'	noncoding_lncRNA_lincRNA
15	24334803	24782667	+	ENSG00000261621	FANTOM5	'RP11-580I1.2'	noncoding_lncRNA_intergenic
15	24407901	24415095	-	ENSG00000260551	Ensembl	'PWRN2'	noncoding_lncRNA_lincRNA
15	24334803	24782667	+	ENSG00000261621	FANTOM5	'RP11-580I1.2'	noncoding_lncRNA_intergenic
15	55103500	55489274	-	ENSG00000137876	FANTOM5	'RSL24D1'	protein_coding
15	55103500	55489274	-	ENSG00000137876	FANTOM5	'RSL24D1'	protein_coding
15	77388063	77713460	-	ENSG00000173517	FANTOM5	'PEAK1'	protein_coding
15	77388063	77713460	-	ENSG00000173517	FANTOM5	'PEAK1'	protein_coding
16	82660574	83830345	+	ENSG00000140945	FANTOM5	'CDH13'	protein_coding
16	85316564	85319569	+	ENSG00000179219	Ensembl	'LINC00311'	noncoding_lncRNA_lincRNA
16	85202817	85421243	+	ENSG00000262601	FANTOM5	'CTC-786C10.1'	protein_coding
16	85202817	85956193	+	ENSG00000131149	FANTOM5	'GSE1'	protein_coding
16	87813740	87845073	-	ENSG00000260177	FANTOM5	'RP4-536B24.3'	noncoding_lncRNA_intergenic
17	60987174	61045910	-	ENSG00000266411	FANTOM5	'RP11-180P8.3'	noncoding_lncRNA_intergenic
17	61011967	61086970	-	ENSG00000263931	FANTOM5	'RP11-180P8.1'	noncoding_lncRNA_divergent
17	66255333	66426968	+	ENSG00000141337	FANTOM5	'ARSG'	protein_coding
17	66861451	66951513	-	ENSG00000141338	FANTOM5	'ABCA8'	protein_coding
17	66871143	67223432	-	ENSG00000154258	FANTOM5	'ABCA9'	protein_coding
18	20117127	20143162	-	CATG00000037022	FANTOM5	'CATG00000037022.1'	noncoding_lncRNA_intergenic
18	20055830	20513727	-	ENSG00000265943	FANTOM5	'RP11-739L10.1'	noncoding_lncRNA_divergent
20	4242235	4505765	+	CATG00000052335	FANTOM5	'CATG00000052335.1'	noncoding_lncRNA_intergenic
20	8229351	8237564	+	ENSG00000225479	Ensembl	'PLCB1-IT1'	noncoding_sense_intronic
20	8101415	8949003	+	ENSG00000182621	FANTOM5	'PLCB1'	protein_coding
21	22370633	22915779	+	ENSG00000154654	FANTOM5	'NCAM2'	protein_coding
21	45118751	45132078	-	CATG00000056958	FANTOM5	'CATG00000056958.1'	protein_coding
21	45079445	45214702	+	ENSG00000160208	FANTOM5	'RRP1B'	protein_coding
22	36124546	36424997	-	ENSG00000100320	FANTOM5	'RBFOX2'	protein_coding
22	43593031	43739378	-	ENSG00000159307	FANTOM5	'SCUBE1'	protein_coding
22	50975519	50987383	-	ENSG00000272666	FANTOM5	'CTA-384D8.35'	noncoding_lncRNA_divergent
22	50977448	51001348	-	ENSG00000217442	FANTOM5	'SYCE3'	protein_coding
22	50978345	50990808	+	ENSG00000226738	FANTOM5	'CTA-384D8.31'	noncoding_lncRNA_intergenic

## Sheet: Supplementary Table 2c
Supplementary Table 2c. List of identified CNV-affected genes for PC
Chromosome	Start	End	Strand	GeneID	Project	GeneName	GeneClass
10	122357721	122359629	+	ENSG00000177234	Ensembl	'C10orf85'	protein_coding
10	122472730	122473456	-	CATG00000001051	FANTOM5	'CATG00000001051.1'	noncoding_lncRNA_intergenic
10	122509545	122510587	+	CATG00000116675	FANTOM5	'CATG00000116675.1'	noncoding_lncRNA_intergenic
10	122638768	122640179	-	ENSG00000271670	Ensembl	'RP11-95I16.4'	noncoding_antisense
10	122713725	122714232	+	CATG00000116687	FANTOM5	'CATG00000116687.1'	noncoding_lncRNA_intergenic
10	122792695	122794007	-	CATG00000001056	FANTOM5	'CATG00000001056.1'	noncoding_lncRNA_intergenic
10	122804691	122805241	-	CATG00000001059	FANTOM5	'CATG00000001059.1'	noncoding_lncRNA_noncoding_sense_intronic
10	122892604	122893270	-	ENSG00000236762	FANTOM5	'RP11-159H3.1'	noncoding_pseudogene
10	122938214	122945480	+	ENSG00000227143	Ensembl	'LINC01153'	noncoding_lncRNA_lincRNA
10	123142464	123143227	+	CATG00000116702	FANTOM5	'CATG00000116702.1'	noncoding_lncRNA_intergenic
10	123170430	123170714	+	ENSG00000222979	Ensembl	'RN7SKP167'	noncoding_misc_RNA
10	123374939	123375353	-	ENSG00000223432	Ensembl	'RP11-62L18.3'	noncoding_lncRNA_lincRNA
10	123473091	123473508	+	ENSG00000223540	FANTOM5	'RPS15AP5'	noncoding_pseudogene
10	123495818	123499245	+	ENSG00000224250	Ensembl	'RP11-78A18.2'	noncoding_antisense
10	123606115	123606215	+	ENSG00000201884	Ensembl	'Y_RNA'	noncoding_misc_RNA
10	123734396	123740032	+	CATG00000116710	FANTOM5	'CATG00000116710.1'	noncoding_lncRNA_divergent
10	123771093	123778708	-	CATG00000001086	FANTOM5	'CATG00000001086.1'	noncoding_lncRNA_divergent
10	123874659	123878779	+	CATG00000116713	FANTOM5	'CATG00000116713.1'	noncoding_short_ncRNA
10	123954386	123954611	-	CATG00000001088	FANTOM5	'CATG00000001088.1'	noncoding_lncRNA_divergent
10	124105205	124105308	+	ENSG00000202245	Ensembl	'RNU6-728P'	noncoding_snRNA
10	124130235	124134702	-	CATG00000001093	FANTOM5	'CATG00000001093.1'	noncoding_lncRNA_divergent
10	124176481	124176583	+	ENSG00000265442	Ensembl	'MIR3941'	noncoding_miRNA
10	124207394	124221566	-	CATG00000001094	FANTOM5	'CATG00000001094.1'	protein_coding
10	124214179	124216868	+	ENSG00000254636	FANTOM5	'ARMS2'	protein_coding
10	124248321	124248514	-	CATG00000001096	FANTOM5	'CATG00000001096.1'	noncoding_short_ncRNA
10	124266202	124266322	-	CATG00000001097	FANTOM5	'CATG00000001097.1'	noncoding_short_ncRNA
10	124399030	124402704	-	CATG00000001099	FANTOM5	'CATG00000001099.1'	noncoding_lncRNA_noncoding_antisense
10	124457225	124459362	-	ENSG00000183559	FANTOM5	'C10orf120'	protein_coding
10	124670126	124673142	+	ENSG00000203795	FANTOM5	'FAM24A'	protein_coding
10	124931048	124931415	-	ENSG00000227586	FANTOM5	'RP11-162A23.5'	noncoding_pseudogene
10	124947669	124956448	+	CATG00000116729	FANTOM5	'CATG00000116729.1'	noncoding_lncRNA_intergenic
10	124975618	124975704	-	ENSG00000265463	Ensembl	'AC012391.1'	noncoding_miRNA
10	125082938	125083102	-	ENSG00000270902	Ensembl	'RP11-338O1.3'	noncoding_pseudogene
10	125185229	125187156	-	ENSG00000225152	Ensembl	'RP11-338O1.2'	noncoding_lncRNA_lincRNA
10	125494301	125494372	-	ENSG00000221293	Ensembl	'AC009987.1'	noncoding_miRNA
10	125536222	125537265	+	ENSG00000231138	FANTOM5	'RP11-391M7.3'	noncoding_lncRNA_noncoding_antisense
10	125650894	125654022	+	CATG00000116746	FANTOM5	'CATG00000116746.1'	noncoding_lncRNA_divergent
10	125670995	125671077	-	ENSG00000221437	Ensembl	'AC068058.1'	noncoding_miRNA
10	125763820	125764344	-	ENSG00000232334	Ensembl	'RP11-47G11.2'	noncoding_pseudogene
10	125805211	125806242	+	CATG00000116751	FANTOM5	'CATG00000116751.1'	noncoding_lncRNA_divergent
10	125852334	125858109	+	CATG00000116753	FANTOM5	'CATG00000116753.1'	protein_coding
10	125955223	125955424	+	CATG00000116755	FANTOM5	'CATG00000116755.1'	noncoding_lncRNA_intergenic
10	122610904	122669039	+	ENSG00000120008	FANTOM5	'WDR11'	protein_coding
10	122685059	122740214	-	ENSG00000227307	FANTOM5	'RP11-95I16.2'	noncoding_lncRNA_intergenic
10	122725987	122752135	+	CATG00000116688	FANTOM5	'CATG00000116688.1'	noncoding_lncRNA_intergenic
10	122907106	122916290	+	CATG00000116699	FANTOM5	'CATG00000116699.1'	noncoding_lncRNA_intergenic
10	123686291	123717352	+	ENSG00000226864	FANTOM5	'RP11-500G22.2'	noncoding_lncRNA_divergent
10	123899827	123914680	-	CATG00000001087	FANTOM5	'CATG00000001087.1'	noncoding_lncRNA_noncoding_antisense
10	124030813	124099735	+	ENSG00000138152	FANTOM5	'BTBD16'	protein_coding
10	124133346	124203193	+	ENSG00000107679	FANTOM5	'PLEKHA1'	protein_coding
10	124233369	124254470	-	CATG00000001095	FANTOM5	'CATG00000001095.1'	protein_coding
10	124432366	124439010	+	CATG00000116722	FANTOM5	'CATG00000116722.1'	protein_coding
10	124578395	124586370	+	ENSG00000272135	FANTOM5	'RP11-107C16.2'	noncoding_pseudogene
10	124591481	124639068	-	ENSG00000138161	FANTOM5	'CUZD1'	protein_coding
10	124608594	124639068	-	ENSG00000213185	FANTOM5	'FAM24B'	protein_coding
10	124612017	124620523	+	CATG00000116725	FANTOM5	'CATG00000116725.1'	noncoding_lncRNA_divergent
10	124679869	124713731	-	ENSG00000119965	FANTOM5	'C10orf88'	protein_coding
10	124713974	124762597	+	ENSG00000179988	FANTOM5	'PSTK'	protein_coding
10	124744910	124768311	-	ENSG00000095574	FANTOM5	'IKZF5'	protein_coding
10	124894886	124903640	+	ENSG00000188620	FANTOM5	'HMX3'	protein_coding
10	124913918	124988481	+	ENSG00000154473	FANTOM5	'BUB3'	protein_coding
10	125014537	125034247	-	CATG00000001102	FANTOM5	'CATG00000001102.1'	noncoding_lncRNA_intergenic
10	125237534	125242371	-	CATG00000001103	FANTOM5	'CATG00000001103.1'	protein_coding
10	125333743	125343283	+	ENSG00000234542	Ensembl	'RP11-282I1.2'	noncoding_lncRNA_lincRNA
10	125673090	125691113	-	ENSG00000234677	Ensembl	'RP11-285A18.2'	noncoding_sense_intronic
10	125751266	125770082	+	ENSG00000213438	FANTOM5	'RP11-47G11.3'	noncoding_pseudogene
10	122215911	122395736	+	ENSG00000203805	FANTOM5	'PPAPDC1A'	protein_coding
10	122517001	122610721	-	ENSG00000227165	FANTOM5	'WDR11-AS1'	noncoding_lncRNA_divergent
10	122798471	123219306	-	CATG00000001057	FANTOM5	'CATG00000001057.1'	noncoding_lncRNA_intergenic
10	123237482	123357945	-	ENSG00000066468	FANTOM5	'FGFR2'	protein_coding
10	123499890	123687978	-	ENSG00000107669	FANTOM5	'ATE1'	protein_coding
10	123748678	124014110	+	ENSG00000138162	FANTOM5	'TACC2'	protein_coding
10	124221042	124281557	+	ENSG00000166033	FANTOM5	'HTRA1'	protein_coding
10	124318316	124403488	+	ENSG00000187908	FANTOM5	'DMBT1'	protein_coding
10	124516197	124557161	+	ENSG00000176584	FANTOM5	'RP11-318C4.2'	noncoding_pseudogene
10	124638535	124658688	+	ENSG00000255624	FANTOM5	'RP11-564D11.3'	noncoding_pseudogene
10	124901917	124912091	+	ENSG00000188816	FANTOM5	'HMX2'	protein_coding
10	125013460	125322172	+	ENSG00000230131	FANTOM5	'RP11-282I1.1'	noncoding_lncRNA_intergenic
10	125425459	125460511	+	ENSG00000154478	FANTOM5	'GPR26'	protein_coding
10	125465723	125703614	-	ENSG00000121898	FANTOM5	'CPXM2'	protein_coding
10	125946107	126042786	-	CATG00000001121	FANTOM5	'CATG00000001121.1'	noncoding_lncRNA_intergenic
10	123710581	123737311	-	ENSG00000107672	FANTOM5	'NSMCE4A'	protein_coding
10	124767543	124819113	+	ENSG00000196177	FANTOM5	'ACADSB'	protein_coding
10	125546165	125853114	-	ENSG00000182022	FANTOM5	'CHST15'	protein_coding
10	73813052	73813795	-	ENSG00000272988	Ensembl	'RP11-150D20.5'	noncoding_lncRNA_lincRNA
10	73848441	73849311	+	CATG00000115580	FANTOM5	'CATG00000115580.1'	noncoding_lncRNA_divergent
10	73940616	73940747	+	ENSG00000200294	Ensembl	'SNORA36'	noncoding_snoRNA
10	73949663	73950334	+	ENSG00000226701	FANTOM5	'RP11-570G20.1'	noncoding_pseudogene
10	73980510	73980610	+	ENSG00000200170	Ensembl	'Y_RNA'	noncoding_misc_RNA
10	74013911	74021605	-	CATG00000000100	FANTOM5	'CATG00000000100.1'	noncoding_lncRNA_intergenic
10	74019652	74022560	+	CATG00000115585	FANTOM5	'CATG00000115585.1'	noncoding_lncRNA_intergenic
10	74031731	74033469	-	CATG00000000105	FANTOM5	'CATG00000000105.1'	noncoding_lncRNA_divergent
10	74031939	74039146	+	ENSG00000168209	FANTOM5	'DDIT4'	protein_coding
10	74033683	74036746	-	CATG00000000106	FANTOM5	'CATG00000000106.1'	protein_coding
10	74034673	74036577	-	ENSG00000269926	FANTOM5	'RP11-442H21.2'	noncoding_sense_overlap_RNA
10	74057240	74059450	+	CATG00000115588	FANTOM5	'CATG00000115588.1'	noncoding_lncRNA_intergenic
10	74068535	74069203	+	CATG00000115591	FANTOM5	'CATG00000115591.1'	noncoding_lncRNA_intergenic
10	74079300	74083675	+	CATG00000115594	FANTOM5	'CATG00000115594.1'	noncoding_lncRNA_intergenic
10	74083850	74085192	-	CATG00000000112	FANTOM5	'CATG00000000112.1'	noncoding_lncRNA_intergenic
10	74114483	74117111	+	CATG00000115596	FANTOM5	'CATG00000115596.1'	noncoding_lncRNA_divergent
10	74151722	74151827	+	ENSG00000202513	Ensembl	'RNU6-805P'	noncoding_snRNA
10	74261504	74262714	+	ENSG00000226163	Ensembl	'RP11-167P22.3'	noncoding_antisense
10	74320022	74320214	+	ENSG00000230609	Ensembl	'RP11-167P22.4'	noncoding_pseudogene
10	74336482	74336553	-	ENSG00000238766	Ensembl	'AL513185.1'	noncoding_miRNA
10	74342561	74342842	+	ENSG00000272536	Ensembl	'Metazoa_SRP'	noncoding_misc_RNA
10	74346439	74347221	-	CATG00000000130	FANTOM5	'CATG00000000130.1'	noncoding_lncRNA_noncoding_sense_intronic
10	74358615	74361185	-	CATG00000000131	FANTOM5	'CATG00000000131.1'	noncoding_lncRNA_noncoding_sense_intronic
10	74386011	74391220	+	CATG00000115600	FANTOM5	'CATG00000115600.1'	noncoding_lncRNA_divergent
10	74396255	74396628	-	ENSG00000231471	FANTOM5	'HMGN2P34'	noncoding_pseudogene
10	74402769	74404408	+	ENSG00000238215	Ensembl	'RP11-167P22.5'	noncoding_pseudogene
10	74413923	74414034	-	ENSG00000201881	Ensembl	'Y_RNA'	noncoding_misc_RNA
10	74447481	74448066	-	CATG00000000134	FANTOM5	'CATG00000000134.1'	noncoding_lncRNA_intergenic
10	74451294	74452230	-	CATG00000000135	FANTOM5	'CATG00000000135.1'	noncoding_lncRNA_divergent
10	74455966	74460314	+	CATG00000115604	FANTOM5	'CATG00000115604.1'	noncoding_lncRNA_noncoding_sense_intronic
10	74470330	74470764	+	CATG00000115607	FANTOM5	'CATG00000115607.1'	noncoding_lncRNA_noncoding_sense_intronic
10	74480842	74480858	+	ENSG00000266719	FANTOM5	'MIR4676'	noncoding_small_RNA
10	74526318	74526810	+	ENSG00000272627	Ensembl	'RP11-354E23.5'	noncoding_sense_intronic
10	74620089	74620267	-	CATG00000000137	FANTOM5	'CATG00000000137.1'	noncoding_short_ncRNA
10	74765591	74766385	-	ENSG00000213700	FANTOM5	'RPL17P50'	noncoding_pseudogene
10	74824884	74825225	+	ENSG00000232646	Ensembl	'RP11-344N10.4'	noncoding_pseudogene
10	74831053	74833766	+	ENSG00000237768	Ensembl	'RP11-344N10.2'	noncoding_antisense
10	74842252	74842353	-	ENSG00000201047	Ensembl	'Y_RNA'	noncoding_misc_RNA
10	74862761	74864255	+	CATG00000115617	FANTOM5	'CATG00000115617.1'	noncoding_lncRNA_intergenic
10	74884331	74885163	-	ENSG00000272599	Ensembl	'RP11-152N13.16'	noncoding_antisense
10	74885838	74885965	-	ENSG00000221164	Ensembl	'SNORA11'	noncoding_snoRNA
10	74951981	74952083	-	ENSG00000199201	Ensembl	'Y_RNA'	noncoding_misc_RNA
10	74959636	74960983	+	ENSG00000227382	FANTOM5	'EIF4A2P2'	noncoding_pseudogene
10	75006752	75014727	+	ENSG00000227540	FANTOM5	'RP11-152N13.5'	noncoding_lncRNA_divergent
10	75038820	75038926	+	ENSG00000200356	Ensembl	'RNU6-833P'	noncoding_snRNA
10	75061539	75061639	-	ENSG00000238983	FANTOM5	'snoU13'	noncoding_small_RNA
10	75106694	75106806	+	ENSG00000207473	Ensembl	'Y_RNA'	noncoding_misc_RNA
10	75141191	75143254	+	ENSG00000233144	Ensembl	'RP11-537A6.9'	noncoding_antisense
10	75170692	75171626	-	CATG00000000150	FANTOM5	'CATG00000000150.1'	noncoding_lncRNA_noncoding_sense_intronic
10	75173934	75174801	+	CATG00000115622	FANTOM5	'CATG00000115622.1'	noncoding_lncRNA_divergent
10	75182017	75182496	-	ENSG00000229659	FANTOM5	'RP11-345K20.2'	noncoding_pseudogene
10	75188425	75188494	+	ENSG00000266344	Ensembl	'AL353731.1'	noncoding_miRNA
10	75242534	75248309	-	CATG00000000152	FANTOM5	'CATG00000000152.1'	noncoding_lncRNA_noncoding_sense_intronic
10	75288809	75288915	-	ENSG00000207327	Ensembl	'RNU6-883P'	noncoding_snRNA
10	75297561	75298149	+	ENSG00000237139	Ensembl	'RP11-137L10.5'	noncoding_pseudogene
10	75385849	75391248	+	ENSG00000268584	FANTOM5	'RP11-464F9.20'	noncoding_lncRNA_divergent
10	75390314	75391248	+	ENSG00000272791	Ensembl	'RP11-464F9.22'	noncoding_lncRNA_lincRNA
10	75466248	75466371	+	ENSG00000252072	Ensembl	'RNA5SP320'	noncoding_rRNA
10	75473354	75473609	-	ENSG00000224005	Ensembl	'AC022400.1'	noncoding_pseudogene
10	75491554	75493396	+	ENSG00000235316	FANTOM5	'DUSP8P5'	noncoding_pseudogene
10	75500296	75500581	-	ENSG00000270808	Ensembl	'RP11-574K11.27'	noncoding_pseudogene
10	75531765	75532732	-	ENSG00000267964	FANTOM5	'AC022400.2'	protein_coding
10	75532061	75540303	+	ENSG00000196968	FANTOM5	'FUT11'	protein_coding
10	75534080	75534299	-	ENSG00000253045	Ensembl	'RMRPP1'	noncoding_misc_RNA
10	75538155	75541711	-	CATG00000000155	FANTOM5	'CATG00000000155.1'	noncoding_lncRNA_divergent
10	75541808	75543410	+	ENSG00000172586	FANTOM5	'CHCHD1'	protein_coding
10	75556272	75561157	-	ENSG00000272589	Ensembl	'ZSWIM8-AS1'	noncoding_antisense
10	75573276	75574495	+	ENSG00000224195	Ensembl	'RP11-574K11.5'	noncoding_antisense
10	75601591	75606324	+	ENSG00000229990	Ensembl	'RP11-574K11.8'	noncoding_antisense
10	75634481	75637991	+	CATG00000115633	FANTOM5	'CATG00000115633.1'	noncoding_lncRNA_divergent
10	75645854	75648935	-	CATG00000000159	FANTOM5	'CATG00000000159.1'	noncoding_lncRNA_intergenic
10	75666719	75667071	+	CATG00000115636	FANTOM5	'CATG00000115636.1'	noncoding_lncRNA_intergenic
10	75686426	75686752	+	CATG00000115637	FANTOM5	'CATG00000115637.1'	noncoding_lncRNA_intergenic
10	75725630	75725934	-	CATG00000000161	FANTOM5	'CATG00000000161.1'	noncoding_lncRNA_intergenic
10	75810676	75811157	+	CATG00000115640	FANTOM5	'CATG00000115640.1'	noncoding_lncRNA_noncoding_sense_intronic
10	75880013	75880621	-	ENSG00000267957	Ensembl	'RP11-178G16.4'	noncoding_lncRNA_lincRNA
10	75880800	75881121	+	ENSG00000269772	Ensembl	'RP11-178G16.5'	noncoding_lncRNA_lincRNA
10	75928937	75929407	+	CATG00000115645	FANTOM5	'CATG00000115645.1'	noncoding_lncRNA_noncoding_sense_intronic
10	76104308	76104563	-	ENSG00000236900	Ensembl	'TIMM9P1'	noncoding_pseudogene
10	76131293	76132174	+	ENSG00000214629	Ensembl	'RPSAP6'	noncoding_pseudogene
10	76183193	76183772	-	ENSG00000213731	Ensembl	'RAB5CP1'	noncoding_pseudogene
10	76287342	76287705	+	ENSG00000226253	Ensembl	'MRPL35P3'	noncoding_pseudogene
10	76311150	76311251	+	ENSG00000206756	Ensembl	'Y_RNA'	noncoding_misc_RNA
10	76401168	76401534	-	ENSG00000271710	Ensembl	'RP11-312P12.3'	noncoding_pseudogene
10	76504144	76504465	-	ENSG00000213525	Ensembl	'RP11-383B24.3'	noncoding_pseudogene
10	76581368	76581888	-	ENSG00000272748	Ensembl	'RP11-222G7.2'	noncoding_lncRNA_lincRNA
10	76584756	76585072	-	CATG00000000163	FANTOM5	'CATG00000000163.1'	noncoding_lncRNA_divergent
10	76782264	76784787	-	ENSG00000227186	FANTOM5	'RP11-77G23.5'	noncoding_lncRNA_divergent
10	76785859	76788450	-	CATG00000000165	FANTOM5	'CATG00000000165.1'	noncoding_lncRNA_noncoding_antisense
10	76849006	76849483	-	ENSG00000237882	Ensembl	'PPIAP13'	noncoding_pseudogene
10	76884975	76885620	+	ENSG00000232437	Ensembl	'RP11-487I5.4'	noncoding_pseudogene
10	76944716	76944816	+	ENSG00000263626	Ensembl	'AL392111.1'	noncoding_miRNA
10	76951469	76952348	+	CATG00000115662	FANTOM5	'CATG00000115662.1'	noncoding_lncRNA_intergenic
10	76951650	76952029	-	CATG00000000167	FANTOM5	'CATG00000000167.1'	noncoding_lncRNA_intergenic
10	76989468	76995715	-	ENSG00000165644	FANTOM5	'COMTD1'	protein_coding
10	77029150	77029303	-	ENSG00000227271	Ensembl	'RPL39P25'	noncoding_pseudogene
10	77036134	77036584	-	ENSG00000233313	FANTOM5	'HMGA1P5'	noncoding_pseudogene
10	77048091	77048440	-	ENSG00000223428	Ensembl	'RP11-399K21.5'	noncoding_pseudogene
10	77142151	77142652	-	ENSG00000236797	FANTOM5	'SPA17P1'	noncoding_pseudogene
10	77168727	77169352	-	ENSG00000273248	FANTOM5	'RP11-399K21.13'	noncoding_lncRNA_intergenic
10	77185648	77191511	-	ENSG00000236842	FANTOM5	'RP11-399K21.10'	noncoding_lncRNA_divergent
10	77333757	77338199	+	CATG00000115668	FANTOM5	'CATG00000115668.1'	noncoding_lncRNA_intergenic
10	77345279	77345834	+	CATG00000115671	FANTOM5	'CATG00000115671.1'	noncoding_lncRNA_intergenic
10	77402234	77402857	+	ENSG00000268659	Ensembl	'RP11-310J24.3'	noncoding_sense_intronic
10	77502498	77503513	+	ENSG00000228280	Ensembl	'RP11-367B6.2'	noncoding_sense_intronic
10	77583444	77583536	-	ENSG00000215921	Ensembl	'AL731568.1'	noncoding_miRNA
10	77887009	77887069	-	ENSG00000221232	Ensembl	'AC012047.1'	noncoding_miRNA
10	78001782	78002071	-	ENSG00000265486	Ensembl	'RN7SL518P'	noncoding_misc_RNA
10	78197166	78198533	-	ENSG00000230575	Ensembl	'RP11-369F10.2'	noncoding_antisense
10	78318108	78320752	-	ENSG00000269256	Ensembl	'RP11-325D15.2'	noncoding_antisense
10	78321895	78324986	+	CATG00000115678	FANTOM5	'CATG00000115678.1'	noncoding_lncRNA_intergenic
10	78595135	78595260	-	ENSG00000252888	Ensembl	'SNORA31'	noncoding_snoRNA
10	78596154	78596619	+	ENSG00000224948	FANTOM5	'ATP5G1P8'	noncoding_pseudogene
10	78639826	78641655	-	CATG00000000180	FANTOM5	'CATG00000000180.1'	noncoding_sense_overlap_RNA
10	78907410	78909858	+	ENSG00000225497	Ensembl	'RP11-180I22.2'	noncoding_antisense
10	79007037	79018065	+	CATG00000115687	FANTOM5	'CATG00000115687.1'	noncoding_lncRNA_noncoding_antisense
10	79073699	79075452	+	ENSG00000224500	Ensembl	'RP11-328K22.1'	noncoding_antisense
10	79110653	79116959	+	CATG00000115688	FANTOM5	'CATG00000115688.1'	noncoding_lncRNA_divergent
10	79193330	79193540	-	ENSG00000228092	Ensembl	'COX6CP15'	noncoding_pseudogene
10	79279464	79280281	-	CATG00000000183	FANTOM5	'CATG00000000183.1'	noncoding_lncRNA_noncoding_sense_intronic
10	79346807	79346917	+	ENSG00000199592	Ensembl	'RNA5SP321'	noncoding_rRNA
10	79368202	79369541	-	CATG00000000192	FANTOM5	'CATG00000000192.1'	noncoding_sense_overlap_RNA
10	79376740	79378430	-	CATG00000000195	FANTOM5	'CATG00000000195.1'	noncoding_lncRNA_noncoding_sense_intronic
10	79386854	79388406	-	CATG00000000196	FANTOM5	'CATG00000000196.1'	noncoding_sense_overlap_RNA
10	79429692	79434351	-	CATG00000000200	FANTOM5	'CATG00000000200.1'	noncoding_lncRNA_intergenic
10	79490524	79494527	+	ENSG00000213514	Ensembl	'RP11-428P16.2'	noncoding_pseudogene
10	79505483	79506085	-	CATG00000000204	FANTOM5	'CATG00000000204.1'	noncoding_lncRNA_intergenic
10	79523672	79525202	+	CATG00000115698	FANTOM5	'CATG00000115698.1'	noncoding_lncRNA_intergenic
10	79536709	79536813	-	ENSG00000199664	Ensembl	'RNU6-1266P'	noncoding_snRNA
10	79540095	79541553	-	ENSG00000213513	FANTOM5	'RP13-39P12.2'	noncoding_pseudogene
10	79582526	79583060	-	CATG00000000205	FANTOM5	'CATG00000000205.1'	noncoding_lncRNA_noncoding_sense_intronic
10	79660896	79671963	-	ENSG00000243446	FANTOM5	'RN7SL284P'	noncoding_lncRNA_noncoding_sense_intronic
10	79713253	79713634	+	ENSG00000234612	Ensembl	'H2AFZP5'	noncoding_pseudogene
10	79784320	79784465	+	CATG00000115703	FANTOM5	'CATG00000115703.1'	noncoding_short_ncRNA
10	79789703	79789903	+	CATG00000115704	FANTOM5	'CATG00000115704.1'	noncoding_lncRNA_divergent
10	79795263	79800453	-	CATG00000000211	FANTOM5	'CATG00000000211.1'	noncoding_lncRNA_noncoding_antisense
10	79828381	79829296	-	ENSG00000231957	Ensembl	'GNAI2P2'	noncoding_pseudogene
10	80015252	80015759	+	CATG00000115714	FANTOM5	'CATG00000115714.1'	noncoding_lncRNA_noncoding_sense_intronic
10	80053442	80068426	+	ENSG00000229543	FANTOM5	'RP11-90J7.2'	noncoding_lncRNA_noncoding_sense_intronic
10	80112354	80115857	+	ENSG00000230229	Ensembl	'RP11-90J7.4'	noncoding_lncRNA_lincRNA
10	80127264	80127380	+	ENSG00000201393	Ensembl	'SNORA71'	noncoding_snoRNA
10	80455819	80456779	-	ENSG00000228683	Ensembl	'RP11-31E13.2'	noncoding_lncRNA_lincRNA
10	80510359	80510454	+	ENSG00000223243	Ensembl	'AC074323.1'	noncoding_miRNA
10	80516844	80517899	+	CATG00000115726	FANTOM5	'CATG00000115726.1'	noncoding_lncRNA_intergenic
10	80760241	80763560	-	ENSG00000229569	Ensembl	'RP11-481G8.2'	noncoding_lncRNA_lincRNA
10	80891155	80894313	+	CATG00000115731	FANTOM5	'CATG00000115731.1'	noncoding_lncRNA_noncoding_sense_intronic
10	80925782	80929814	+	CATG00000115734	FANTOM5	'CATG00000115734.1'	protein_coding
10	80968011	80968153	-	CATG00000000225	FANTOM5	'CATG00000000225.1'	noncoding_short_ncRNA
10	81025244	81026406	+	CATG00000115736	FANTOM5	'CATG00000115736.1'	noncoding_lncRNA_noncoding_sense_intronic
10	81056672	81060649	-	CATG00000000226	FANTOM5	'CATG00000000226.1'	protein_coding
10	81075261	81075963	-	CATG00000000229	FANTOM5	'CATG00000000229.1'	noncoding_sense_overlap_RNA
10	81082076	81083124	-	CATG00000000231	FANTOM5	'CATG00000000231.1'	noncoding_lncRNA_intergenic
10	81088694	81090084	+	CATG00000115741	FANTOM5	'CATG00000115741.1'	noncoding_lncRNA_intergenic
10	81090384	81091623	-	CATG00000000232	FANTOM5	'CATG00000000232.1'	noncoding_lncRNA_intergenic
10	81091286	81091878	+	CATG00000115742	FANTOM5	'CATG00000115742.1'	noncoding_lncRNA_intergenic
10	81093644	81095045	+	CATG00000115743	FANTOM5	'CATG00000115743.1'	noncoding_lncRNA_intergenic
10	81101431	81107109	-	CATG00000000233	FANTOM5	'CATG00000000233.1'	noncoding_lncRNA_divergent
10	81259422	81259740	-	ENSG00000259021	Ensembl	'TPRX1P1'	noncoding_pseudogene
10	81266126	81270678	-	ENSG00000235705	Ensembl	'AL133481.1'	protein_coding
10	81270301	81270439	-	ENSG00000272475	Ensembl	'RP11-342M3.2'	noncoding_pseudogene
10	81272289	81276188	+	ENSG00000253626	FANTOM5	'EIF5AL1'	protein_coding
10	81286264	81286387	-	ENSG00000271985	Ensembl	'RP11-589B3.7'	noncoding_pseudogene
10	81303825	81304112	+	ENSG00000232965	FANTOM5	'RPS12P18'	noncoding_pseudogene
10	81315417	81320163	-	ENSG00000185303	FANTOM5	'SFTPA2'	protein_coding
10	81342054	81344633	-	ENSG00000219430	Ensembl	'MBL3P'	noncoding_pseudogene
10	81355050	81355416	-	ENSG00000225827	Ensembl	'SFTPA3P'	noncoding_pseudogene
10	81388513	81391944	-	ENSG00000226676	Ensembl	'RP11-589B3.6'	noncoding_lncRNA_lincRNA
10	81422948	81424542	+	ENSG00000272489	Ensembl	'RP11-182L21.5'	noncoding_sense_intronic
10	81444250	81444739	-	ENSG00000224886	Ensembl	'BEND3P3'	noncoding_pseudogene
10	81462983	81474437	+	ENSG00000188199	Ensembl	'NUTM2B'	protein_coding
10	81620329	81621562	+	ENSG00000214695	Ensembl	'NPAP1P2'	noncoding_pseudogene
10	81630131	81633659	-	ENSG00000204437	Ensembl	'CTSLP6'	noncoding_pseudogene
10	81651904	81652941	-	ENSG00000214584	FANTOM5	'PGGT1BP2'	noncoding_pseudogene
10	81727969	81732969	+	ENSG00000273372	Ensembl	'RP11-479O17.10'	noncoding_lncRNA_lincRNA
10	81741577	81741968	+	ENSG00000235924	FANTOM5	'ZNRF2P3'	noncoding_pseudogene
10	81742666	81742996	-	ENSG00000225100	Ensembl	'RP11-479O17.7'	noncoding_pseudogene
10	81784493	81784978	-	ENSG00000224760	FANTOM5	'C1DP3'	noncoding_pseudogene
10	81791600	81792149	-	ENSG00000236217	Ensembl	'C1DP2'	noncoding_pseudogene
10	81885732	81886073	+	ENSG00000230171	FANTOM5	'RPL22P18'	noncoding_pseudogene
10	81975607	81975875	-	ENSG00000234319	Ensembl	'RPS12P2'	noncoding_pseudogene
10	82009466	82013395	+	ENSG00000204038	Ensembl	'AL359195.1'	protein_coding
10	82021923	82024673	-	CATG00000000244	FANTOM5	'CATG00000000244.1'	noncoding_lncRNA_intergenic
10	82057476	82059411	+	ENSG00000232950	Ensembl	'RP11-36D19.4'	noncoding_pseudogene
10	82093527	82094182	+	ENSG00000235858	Ensembl	'RP11-36D19.8'	noncoding_lncRNA_lincRNA
10	82194765	82196869	+	ENSG00000271738	Ensembl	'RP11-137H2.6'	noncoding_lncRNA_lincRNA
10	82211276	82213861	-	CATG00000000249	FANTOM5	'CATG00000000249.1'	noncoding_lncRNA_divergent
10	82283180	82295768	-	ENSG00000226659	FANTOM5	'RP11-137H2.4'	noncoding_lncRNA_divergent
10	82476239	82476824	-	ENSG00000233353	Ensembl	'RPS7P9'	noncoding_pseudogene
10	82535921	82537803	-	ENSG00000231060	FANTOM5	'FARSBP1'	noncoding_pseudogene
10	82654353	82657070	+	CATG00000115765	FANTOM5	'CATG00000115765.1'	noncoding_lncRNA_intergenic
10	82700421	82700957	-	ENSG00000227209	Ensembl	'WARS2P1'	noncoding_pseudogene
10	82717142	82717702	+	CATG00000115771	FANTOM5	'CATG00000115771.1'	noncoding_lncRNA_intergenic
10	82896296	82897091	-	ENSG00000226466	Ensembl	'RPA2P2'	noncoding_pseudogene
10	82904408	82904487	+	ENSG00000265990	Ensembl	'AL356154.1'	noncoding_miRNA
10	83629968	83634807	-	CATG00000000263	FANTOM5	'CATG00000000263.1'	noncoding_lncRNA_divergent
10	84100527	84100632	+	ENSG00000207275	Ensembl	'RNU6-441P'	noncoding_snRNA
10	84235266	84237989	+	CATG00000115794	FANTOM5	'CATG00000115794.1'	noncoding_sense_overlap_RNA
10	84827718	84827827	-	ENSG00000200774	Ensembl	'RNU6-478P'	noncoding_snRNA
10	85071384	85074231	-	ENSG00000234931	Ensembl	'MARK2P15'	noncoding_pseudogene
10	85299977	85310935	+	CATG00000115819	FANTOM5	'CATG00000115819.1'	noncoding_lncRNA_intergenic
10	85432162	85435195	-	ENSG00000233945	Ensembl	'RP11-344L13.2'	noncoding_lncRNA_lincRNA
10	85495262	85496249	+	ENSG00000223565	Ensembl	'RP11-344L13.1'	noncoding_pseudogene
10	85524114	85524220	+	ENSG00000212324	Ensembl	'RNU6-129P'	noncoding_snRNA
10	85763088	85763235	+	ENSG00000200789	FANTOM5	'RNU1-65P'	noncoding_small_RNA
10	85841087	85841751	+	ENSG00000212769	FANTOM5	'HMGN2P8'	noncoding_pseudogene
10	85891155	85891474	+	CATG00000115825	FANTOM5	'CATG00000115825.1'	noncoding_lncRNA_intergenic
10	85898176	85900338	-	ENSG00000271933	Ensembl	'RP11-338I21.1'	noncoding_antisense
10	85997153	85997784	+	CATG00000115829	FANTOM5	'CATG00000115829.1'	noncoding_lncRNA_divergent
10	86148926	86149382	-	ENSG00000233189	Ensembl	'RPL12P29'	noncoding_pseudogene
10	86150664	86151801	+	ENSG00000225423	Ensembl	'TNPO1P1'	noncoding_pseudogene
10	86214435	86215812	-	ENSG00000225928	Ensembl	'CACYBPP1'	noncoding_pseudogene
10	86320173	86321062	+	ENSG00000178429	FANTOM5	'RPS3AP5'	noncoding_pseudogene
10	86623021	86623118	+	ENSG00000238469	Ensembl	'AC091487.1'	noncoding_miRNA
10	86953177	86957714	-	ENSG00000237267	Ensembl	'RP11-181F12.1'	noncoding_lncRNA_lincRNA
10	87191699	87192531	-	ENSG00000223993	FANTOM5	'RP11-475D12.1'	noncoding_lncRNA_intergenic
10	87297136	87297240	+	ENSG00000223064	Ensembl	'RNU6-325P'	noncoding_snRNA
10	87318481	87318829	+	ENSG00000252730	Ensembl	'RN7SKP84'	noncoding_misc_RNA
10	87340007	87340273	-	CATG00000000300	FANTOM5	'CATG00000000300.1'	noncoding_lncRNA_intergenic
10	87403824	87407823	+	ENSG00000270002	FANTOM5	'RP11-93H12.4'	noncoding_lncRNA_noncoding_antisense
10	87409769	87410017	-	ENSG00000252292	Ensembl	'RN7SKP238'	noncoding_misc_RNA
10	87468517	87468924	+	ENSG00000236606	Ensembl	'RP11-93H12.3'	noncoding_pseudogene
10	87812205	87812323	+	ENSG00000200487	Ensembl	'RNA5SP322'	noncoding_rRNA
10	87835141	87836509	-	CATG00000000313	FANTOM5	'CATG00000000313.1'	noncoding_sense_overlap_RNA
10	88024451	88024545	-	ENSG00000199104	Ensembl	'MIR346'	noncoding_miRNA
10	88062583	88062678	-	ENSG00000238803	Ensembl	'AL732479.1'	noncoding_miRNA
10	88248203	88248306	+	ENSG00000212332	Ensembl	'RNU6-780P'	noncoding_snRNA
10	88390582	88391384	-	ENSG00000230507	FANTOM5	'RPL7AP8'	noncoding_pseudogene
10	88468366	88471476	-	CATG00000000321	FANTOM5	'CATG00000000321.1'	noncoding_lncRNA_divergent
10	88505597	88505706	-	ENSG00000252189	Ensembl	'U3'	noncoding_snoRNA
10	88554626	88555431	+	CATG00000115869	FANTOM5	'CATG00000115869.1'	noncoding_lncRNA_noncoding_sense_intronic
10	88614453	88615993	-	ENSG00000270874	Ensembl	'RP11-420K10.1'	noncoding_pseudogene
10	88649325	88649490	+	ENSG00000200176	FANTOM5	'RNU1-19P'	noncoding_small_RNA
10	88724965	88730967	-	ENSG00000272734	FANTOM5	'ADIRF-AS1'	noncoding_lncRNA_noncoding_sense_intronic
10	88728728	88730967	-	ENSG00000273413	FANTOM5	'RP11-96C23.15'	noncoding_lncRNA_noncoding_sense_intronic
10	88769542	88775539	-	ENSG00000229969	Ensembl	'RP11-96C23.10'	noncoding_antisense
10	88786941	88787234	+	ENSG00000271573	Ensembl	'RP11-96C23.12'	noncoding_pseudogene
10	88810004	88813100	+	CATG00000115873	FANTOM5	'CATG00000115873.1'	noncoding_lncRNA_noncoding_antisense
10	88873711	88875280	+	ENSG00000237280	Ensembl	'RP11-96C23.9'	noncoding_sense_intronic
10	88913843	88914126	-	ENSG00000266323	Ensembl	'RN7SL733P'	noncoding_misc_RNA
10	88985205	88996665	+	ENSG00000184923	Ensembl	'NUTM2A'	protein_coding
10	89136653	89138238	+	ENSG00000237740	Ensembl	'NPAP1P3'	noncoding_pseudogene
10	89146442	89149960	-	ENSG00000236417	Ensembl	'CTSLP1'	noncoding_pseudogene
10	89167801	89168015	-	ENSG00000231569	Ensembl	'RP11-399L7.3'	noncoding_pseudogene
10	89297883	89298920	+	CATG00000115883	FANTOM5	'CATG00000115883.1'	noncoding_sense_overlap_RNA
10	89322845	89322943	-	ENSG00000222192	Ensembl	'Y_RNA'	noncoding_misc_RNA
10	89402338	89402711	+	ENSG00000234192	FANTOM5	'RP11-57C13.5'	noncoding_pseudogene
10	89523144	89523919	-	CATG00000000329	FANTOM5	'CATG00000000329.1'	noncoding_lncRNA_noncoding_sense_intronic
10	89592578	89592855	-	ENSG00000243782	Ensembl	'RN7SL78P'	noncoding_misc_RNA
10	89629002	89631309	+	CATG00000115891	FANTOM5	'CATG00000115891.1'	noncoding_lncRNA_noncoding_sense_intronic
10	89699592	89700364	+	CATG00000115893	FANTOM5	'CATG00000115893.1'	noncoding_lncRNA_noncoding_sense_intronic
10	89705237	89707008	+	ENSG00000213613	FANTOM5	'RP11-380G5.3'	noncoding_pseudogene
10	89754375	89754452	-	ENSG00000200891	Ensembl	'SNORD74'	noncoding_snoRNA
10	89807892	89809580	-	ENSG00000227905	Ensembl	'MED6P1'	noncoding_pseudogene
10	89824954	89826101	+	CATG00000115896	FANTOM5	'CATG00000115896.1'	noncoding_lncRNA_noncoding_sense_intronic
10	89841340	89842683	-	CATG00000000337	FANTOM5	'CATG00000000337.1'	noncoding_sense_overlap_RNA
10	89861966	89863455	-	CATG00000000339	FANTOM5	'CATG00000000339.1'	noncoding_lncRNA_noncoding_sense_intronic
10	89867471	89868020	-	CATG00000000342	FANTOM5	'CATG00000000342.1'	noncoding_lncRNA_intergenic
10	89870333	89870869	+	CATG00000115902	FANTOM5	'CATG00000115902.1'	noncoding_sense_overlap_RNA
10	89875081	89876383	-	CATG00000000346	FANTOM5	'CATG00000000346.1'	noncoding_lncRNA_intergenic
10	89877838	89878296	+	CATG00000115903	FANTOM5	'CATG00000115903.1'	noncoding_sense_overlap_RNA
10	89912245	89912692	-	CATG00000000347	FANTOM5	'CATG00000000347.1'	noncoding_lncRNA_intergenic
10	89922121	89922655	-	CATG00000000349	FANTOM5	'CATG00000000349.1'	noncoding_lncRNA_intergenic
10	90033864	90037546	+	CATG00000115914	FANTOM5	'CATG00000115914.1'	noncoding_sense_overlap_RNA
10	90345395	90345490	-	ENSG00000201548	Ensembl	'Y_RNA'	noncoding_misc_RNA
10	90377980	90378711	-	ENSG00000237205	FANTOM5	'RP11-425M17.3'	noncoding_pseudogene
10	90424203	90438577	+	ENSG00000182333	FANTOM5	'LIPF'	protein_coding
10	90459440	90460158	+	ENSG00000271408	Ensembl	'RP11-186O14.7'	noncoding_pseudogene
10	90487242	90488671	+	ENSG00000226358	Ensembl	'KRT8P38'	noncoding_pseudogene
10	90515101	90515551	-	CATG00000000363	FANTOM5	'CATG00000000363.1'	noncoding_lncRNA_intergenic
10	90515761	90516775	+	CATG00000115923	FANTOM5	'CATG00000115923.1'	noncoding_lncRNA_intergenic
10	90545357	90546818	-	ENSG00000235150	Ensembl	'RCBTB2P1'	noncoding_pseudogene
10	90552496	90552513	-	CATG00000000365	FANTOM5	'CATG00000000365.1'	noncoding_short_ncRNA
10	90552708	90553728	+	CATG00000115924	FANTOM5	'CATG00000115924.1'	noncoding_lncRNA_intergenic
10	90613254	90613957	+	CATG00000115925	FANTOM5	'CATG00000115925.1'	noncoding_lncRNA_intergenic
10	90617810	90618240	-	CATG00000000367	FANTOM5	'CATG00000000367.1'	noncoding_lncRNA_intergenic
10	90639810	90639909	-	CATG00000000368	FANTOM5	'CATG00000000368.1'	noncoding_short_ncRNA
10	90692400	90700368	+	ENSG00000180139	Ensembl	'ACTA2-AS1'	noncoding_antisense
10	90707021	90709201	+	CATG00000115928	FANTOM5	'CATG00000115928.1'	noncoding_lncRNA_noncoding_sense_intronic
10	90775593	90776816	+	ENSG00000261438	Ensembl	'RP11-399O19.9'	noncoding_sense_overlapping
10	90820788	90820888	-	ENSG00000238991	Ensembl	'snoU13'	noncoding_snoRNA
10	90823092	90823168	-	ENSG00000265375	Ensembl	'MIR4679-2'	noncoding_miRNA
10	90837647	90846807	-	CATG00000000370	FANTOM5	'CATG00000000370.1'	noncoding_lncRNA_intergenic
10	90965694	90967071	-	ENSG00000138135	FANTOM5	'CH25H'	protein_coding
10	90966799	90967036	+	CATG00000115940	FANTOM5	'CATG00000115940.1'	noncoding_lncRNA_divergent
10	91013495	91015077	-	CATG00000000373	FANTOM5	'CATG00000000373.1'	noncoding_lncRNA_noncoding_sense_intronic
10	91024097	91024163	-	ENSG00000266769	Ensembl	'AL353751.1'	noncoding_miRNA
10	91065331	91067913	-	CATG00000000376	FANTOM5	'CATG00000000376.1'	noncoding_sense_overlap_RNA
10	91106292	91107904	-	CATG00000000380	FANTOM5	'CATG00000000380.1'	noncoding_sense_overlap_RNA
10	91122051	91123244	+	ENSG00000224289	Ensembl	'IFIT6P'	noncoding_pseudogene
10	91352500	91352511	-	ENSG00000198997	FANTOM5	'MIR107'	noncoding_small_RNA
10	91404360	91404972	-	ENSG00000249962	FANTOM5	'RP11-80H5.5'	noncoding_pseudogene
10	91470726	91470858	-	CATG00000000388	FANTOM5	'CATG00000000388.1'	noncoding_short_ncRNA
10	91597369	91599091	-	ENSG00000270670	Ensembl	'RP11-248C1.3'	noncoding_pseudogene
10	91731548	91732116	+	CATG00000115957	FANTOM5	'CATG00000115957.1'	noncoding_lncRNA_noncoding_sense_intronic
10	91738448	91738827	+	ENSG00000228938	FANTOM5	'SNRPD2P1'	noncoding_pseudogene
10	91821720	91822559	+	CATG00000115960	FANTOM5	'CATG00000115960.1'	noncoding_lncRNA_noncoding_sense_intronic
10	91923408	91923717	-	ENSG00000222451	Ensembl	'RN7SKP143'	noncoding_misc_RNA
10	91960714	91960950	-	CATG00000000396	FANTOM5	'CATG00000000396.1'	noncoding_lncRNA_noncoding_sense_intronic
10	92631258	92631653	-	CATG00000000412	FANTOM5	'CATG00000000412.1'	noncoding_lncRNA_divergent
10	92639797	92639936	-	ENSG00000222305	Ensembl	'Y_RNA'	noncoding_misc_RNA
10	92671682	92680844	-	ENSG00000148677	FANTOM5	'ANKRD1'	protein_coding
10	92671857	92672384	+	CATG00000115978	FANTOM5	'CATG00000115978.1'	noncoding_lncRNA_noncoding_antisense
10	92682488	92682592	-	ENSG00000201604	Ensembl	'RNU6-740P'	noncoding_snRNA
10	92690332	92691917	+	CATG00000115980	FANTOM5	'CATG00000115980.1'	noncoding_lncRNA_intergenic
10	92695135	92695344	-	CATG00000000416	FANTOM5	'CATG00000000416.1'	noncoding_lncRNA_intergenic
10	92757237	92757470	-	ENSG00000273124	Ensembl	'RP11-236B18.5'	noncoding_lncRNA_lincRNA
10	92761706	92763257	-	CATG00000000419	FANTOM5	'CATG00000000419.1'	noncoding_lncRNA_noncoding_sense_intronic
10	92793806	92796976	-	CATG00000000420	FANTOM5	'CATG00000000420.1'	noncoding_lncRNA_noncoding_sense_intronic
10	92812808	92814804	+	ENSG00000220585	Ensembl	'DDX18P6'	noncoding_pseudogene
10	92922090	92922360	+	CATG00000115985	FANTOM5	'CATG00000115985.1'	noncoding_lncRNA_divergent
10	92933354	92934001	+	CATG00000115988	FANTOM5	'CATG00000115988.1'	noncoding_lncRNA_intergenic
10	92953209	92954920	+	CATG00000115992	FANTOM5	'CATG00000115992.1'	noncoding_lncRNA_intergenic
10	93167066	93170289	-	CATG00000000429	FANTOM5	'CATG00000000429.1'	protein_coding
10	93224335	93224465	-	ENSG00000271385	Ensembl	'RP11-108M11.3'	noncoding_pseudogene
10	93304609	93304855	+	ENSG00000223876	Ensembl	'RPS27P1'	noncoding_pseudogene
10	93311879	93313121	+	CATG00000116003	FANTOM5	'CATG00000116003.1'	noncoding_short_ncRNA
10	93351944	93352569	-	CATG00000000438	FANTOM5	'CATG00000000438.1'	noncoding_sense_overlap_RNA
10	93426537	93427610	-	ENSG00000213449	FANTOM5	'GAPDHP28'	noncoding_pseudogene
10	93447468	93452290	-	CATG00000000446	FANTOM5	'CATG00000000446.1'	noncoding_lncRNA_intergenic
10	93525656	93526953	-	ENSG00000228759	Ensembl	'FAF2P1'	noncoding_pseudogene
10	93561088	93567581	+	CATG00000116012	FANTOM5	'CATG00000116012.1'	noncoding_lncRNA_noncoding_sense_intronic
10	93638575	93643659	-	CATG00000000447	FANTOM5	'CATG00000000447.1'	noncoding_lncRNA_intergenic
10	93647267	93648027	+	CATG00000116015	FANTOM5	'CATG00000116015.1'	noncoding_lncRNA_intergenic
10	93667961	93669691	+	ENSG00000272817	FANTOM5	'RP11-402D21.2'	noncoding_lncRNA_noncoding_antisense
10	93682954	93683502	-	CATG00000000449	FANTOM5	'CATG00000000449.1'	noncoding_lncRNA_divergent
10	93835999	93836122	+	ENSG00000252993	Ensembl	'SNORA25'	noncoding_snoRNA
10	93878459	93878921	+	ENSG00000214549	FANTOM5	'SDHCP2'	noncoding_pseudogene
10	93919329	93919429	+	ENSG00000264076	Ensembl	'AL158040.1'	noncoding_miRNA
10	93963986	93964063	-	ENSG00000221042	Ensembl	'CPEB3_ribozyme'	noncoding_misc_RNA
10	93976063	93976550	+	ENSG00000105988	FANTOM5	'NHP2P1'	noncoding_pseudogene
10	94000074	94003770	+	CATG00000116021	FANTOM5	'CATG00000116021.1'	noncoding_lncRNA_divergent
10	94031904	94032007	-	ENSG00000199881	Ensembl	'Y_RNA'	noncoding_misc_RNA
10	94094220	94094321	+	ENSG00000202297	Ensembl	'Y_RNA'	noncoding_misc_RNA
10	94178424	94180632	+	ENSG00000232709	Ensembl	'MARK2P9'	noncoding_pseudogene
10	94200968	94201061	-	ENSG00000207895	Ensembl	'AL161652.1'	noncoding_miRNA
10	94299178	94300552	-	CATG00000000455	FANTOM5	'CATG00000000455.1'	noncoding_sense_overlap_RNA
10	94356609	94357370	-	ENSG00000184111	FANTOM5	'RP11-366I13.3'	noncoding_pseudogene
10	94418801	94419055	+	ENSG00000264313	Ensembl	'RN7SL644P'	noncoding_misc_RNA
10	94449700	94449940	-	CATG00000000460	FANTOM5	'CATG00000000460.1'	noncoding_lncRNA_divergent
10	94459036	94459526	-	CATG00000000462	FANTOM5	'CATG00000000462.1'	noncoding_lncRNA_divergent
10	94470256	94470365	-	ENSG00000201412	Ensembl	'Y_RNA'	noncoding_misc_RNA
10	94514334	94517389	-	CATG00000000463	FANTOM5	'CATG00000000463.1'	noncoding_lncRNA_intergenic
10	94637849	94638046	-	ENSG00000225118	Ensembl	'RP11-477L16.2'	noncoding_pseudogene
10	94819206	94822309	-	ENSG00000226425	FANTOM5	'RP11-348J12.2'	noncoding_lncRNA_divergent
10	94820555	94828454	+	ENSG00000187553	FANTOM5	'CYP26C1'	protein_coding
10	94831504	94838184	+	ENSG00000095596	FANTOM5	'CYP26A1'	protein_coding
10	94866629	94867140	-	ENSG00000232805	Ensembl	'NIP7P1'	noncoding_pseudogene
10	94966130	94969429	-	ENSG00000237417	FANTOM5	'XRCC6P1'	noncoding_pseudogene
10	95031525	95032775	-	CATG00000000468	FANTOM5	'CATG00000000468.1'	noncoding_lncRNA_intergenic
10	95043761	95044352	-	ENSG00000213432	FANTOM5	'RP11-624L12.1'	noncoding_pseudogene
10	95134591	95134716	+	CATG00000116045	FANTOM5	'CATG00000116045.1'	noncoding_short_ncRNA
10	95168567	95168957	+	CATG00000116048	FANTOM5	'CATG00000116048.1'	noncoding_lncRNA_divergent
10	95217250	95218902	-	CATG00000000474	FANTOM5	'CATG00000000474.1'	noncoding_sense_overlap_RNA
10	95241941	95242607	+	CATG00000116051	FANTOM5	'CATG00000116051.1'	noncoding_lncRNA_divergent
10	95259810	95259981	-	CATG00000000478	FANTOM5	'CATG00000000478.1'	noncoding_short_ncRNA
10	95262872	95263018	-	CATG00000000479	FANTOM5	'CATG00000000479.1'	noncoding_short_ncRNA
10	95270305	95270437	-	ENSG00000212396	Ensembl	'RNA5SP323'	noncoding_rRNA
10	95276704	95276966	-	CATG00000000481	FANTOM5	'CATG00000000481.1'	noncoding_lncRNA_divergent
10	95325801	95327739	-	CATG00000000482	FANTOM5	'CATG00000000482.1'	protein_coding
10	95368343	95368456	+	ENSG00000221352	Ensembl	'AL356214.1'	noncoding_miRNA
10	95416732	95417925	-	CATG00000000486	FANTOM5	'CATG00000000486.1'	noncoding_lncRNA_noncoding_antisense
10	95459796	95462286	+	CATG00000116057	FANTOM5	'CATG00000116057.1'	noncoding_lncRNA_divergent
10	95462471	95463255	+	CATG00000116058	FANTOM5	'CATG00000116058.1'	noncoding_lncRNA_divergent
10	95560401	95563340	+	CATG00000116062	FANTOM5	'CATG00000116062.1'	noncoding_lncRNA_intergenic
10	95575130	95575723	+	CATG00000116064	FANTOM5	'CATG00000116064.1'	noncoding_lncRNA_intergenic
10	95635138	95636187	-	CATG00000000491	FANTOM5	'CATG00000000491.1'	noncoding_lncRNA_intergenic
10	95641050	95641676	-	ENSG00000227995	FANTOM5	'RAB11AP1'	noncoding_pseudogene
10	95717948	95721673	-	ENSG00000180764	FANTOM5	'PIPSL'	noncoding_pseudogene
10	95719250	95719578	+	CATG00000116067	FANTOM5	'CATG00000116067.1'	noncoding_lncRNA_divergent
10	95725646	95728035	+	CATG00000116068	FANTOM5	'CATG00000116068.1'	noncoding_lncRNA_intergenic
10	95806795	95806882	-	ENSG00000252895	Ensembl	'RNY4P26'	noncoding_misc_RNA
10	95897505	95899257	+	ENSG00000234724	Ensembl	'HDAC1P1'	noncoding_pseudogene
10	95915396	95915502	-	ENSG00000206631	Ensembl	'RNU6-657P'	noncoding_snRNA
10	95984917	95987045	-	ENSG00000228553	Ensembl	'RP11-391J2.3'	noncoding_antisense
10	96074664	96075084	-	ENSG00000273450	Ensembl	'RP11-76P2.4'	noncoding_antisense
10	96122784	96123835	+	CATG00000116071	FANTOM5	'CATG00000116071.1'	noncoding_lncRNA_divergent
10	96161950	96163461	-	CATG00000000494	FANTOM5	'CATG00000000494.1'	protein_coding
10	96406121	96407753	-	ENSG00000235746	Ensembl	'CTBP2P2'	noncoding_pseudogene
10	96533913	96534390	-	ENSG00000230338	Ensembl	'MTND4P19'	noncoding_pseudogene
10	96642311	96643100	+	ENSG00000225354	Ensembl	'RP11-400G3.3'	noncoding_pseudogene
10	96700010	96700878	-	ENSG00000233377	Ensembl	'MTND4P20'	noncoding_pseudogene
10	96748967	96758226	-	CATG00000000497	FANTOM5	'CATG00000000497.1'	noncoding_lncRNA_intergenic
10	96766883	96767313	-	ENSG00000228460	Ensembl	'CYP2C59P'	noncoding_pseudogene
10	96769431	96769569	+	ENSG00000260863	Ensembl	'CYP2C60P'	noncoding_pseudogene
10	96791397	96791805	+	ENSG00000237885	Ensembl	'RP11-208C17.4'	noncoding_pseudogene
10	96943410	96943974	+	ENSG00000225533	Ensembl	'PAWRP1'	noncoding_pseudogene
10	96943496	96943503	-	CATG00000000508	FANTOM5	'CATG00000000508.1'	noncoding_short_ncRNA
10	97050890	97052202	+	CATG00000116084	FANTOM5	'CATG00000116084.1'	noncoding_lncRNA_divergent
10	97063465	97063556	-	CATG00000000516	FANTOM5	'CATG00000000516.1'	noncoding_short_ncRNA
10	97175175	97176737	+	CATG00000116086	FANTOM5	'CATG00000116086.1'	noncoding_lncRNA_divergent
10	97354325	97355129	+	ENSG00000214362	FANTOM5	'RP11-7D5.2'	noncoding_pseudogene
10	97538277	97540192	+	CATG00000116089	FANTOM5	'CATG00000116089.1'	noncoding_sense_overlap_RNA
10	97589552	97592106	-	CATG00000000523	FANTOM5	'CATG00000000523.1'	noncoding_lncRNA_noncoding_sense_intronic
10	97637927	97640255	-	CATG00000000525	FANTOM5	'CATG00000000525.1'	noncoding_lncRNA_noncoding_sense_intronic
10	97753773	97760042	-	ENSG00000227805	FANTOM5	'RP11-248J23.5'	noncoding_pseudogene
10	97824072	97824156	-	ENSG00000266407	Ensembl	'MIR3157'	noncoding_miRNA
10	97849627	97850124	+	CATG00000116094	FANTOM5	'CATG00000116094.1'	noncoding_lncRNA_intergenic
10	97872504	97872608	+	ENSG00000200728	Ensembl	'RNU6-271P'	noncoding_snRNA
10	97884460	97886245	+	CATG00000116095	FANTOM5	'CATG00000116095.1'	noncoding_lncRNA_intergenic
10	97888915	97890493	-	CATG00000000529	FANTOM5	'CATG00000000529.1'	noncoding_lncRNA_intergenic
10	97949122	97949975	-	ENSG00000229417	Ensembl	'NPM1P25'	noncoding_pseudogene
10	98068386	98072007	-	CATG00000000532	FANTOM5	'CATG00000000532.1'	noncoding_lncRNA_noncoding_antisense
10	98379133	98379240	+	ENSG00000202047	Ensembl	'RNA5SP324'	noncoding_rRNA
10	98380634	98381464	-	ENSG00000227032	Ensembl	'RP11-34E5.4'	noncoding_pseudogene
10	98405043	98405763	+	CATG00000116101	FANTOM5	'CATG00000116101.1'	noncoding_lncRNA_noncoding_antisense
10	98408299	98408803	+	CATG00000116103	FANTOM5	'CATG00000116103.1'	noncoding_lncRNA_divergent
10	98469344	98469799	+	CATG00000116106	FANTOM5	'CATG00000116106.1'	noncoding_lncRNA_divergent
10	98473868	98476204	-	CATG00000000539	FANTOM5	'CATG00000000539.1'	noncoding_lncRNA_noncoding_sense_intronic
10	98500924	98503160	+	CATG00000116108	FANTOM5	'CATG00000116108.1'	noncoding_lncRNA_noncoding_sense_intronic
10	98502924	98503030	+	ENSG00000207287	Ensembl	'RNU6-1274P'	noncoding_snRNA
10	98588426	98588521	-	ENSG00000207976	Ensembl	'MIR607'	noncoding_miRNA
10	98590305	98591983	-	CATG00000000543	FANTOM5	'CATG00000000543.1'	noncoding_lncRNA_divergent
10	98675390	98675659	-	ENSG00000232875	Ensembl	'HMGN2P35'	noncoding_pseudogene
10	98680459	98680548	+	ENSG00000221465	Ensembl	'AL162502.1'	noncoding_miRNA
10	98737809	98740931	-	CATG00000000559	FANTOM5	'CATG00000000559.1'	noncoding_lncRNA_divergent
10	98741089	98745582	+	ENSG00000155640	FANTOM5	'C10orf12'	protein_coding
10	98752207	98755716	+	ENSG00000231025	Ensembl	'RP11-175O19.4'	noncoding_antisense
10	98862536	98863504	+	ENSG00000234855	FANTOM5	'RP11-453E2.2'	noncoding_lncRNA_noncoding_sense_intronic
10	99034805	99037854	+	ENSG00000231398	FANTOM5	'RP11-375N9.2'	noncoding_pseudogene
10	99079029	99084631	+	ENSG00000165879	FANTOM5	'FRAT1'	protein_coding
10	99094303	99102770	+	ENSG00000225850	FANTOM5	'RP11-452K12.4'	noncoding_lncRNA_divergent
10	99152954	99153304	-	ENSG00000231508	Ensembl	'RP11-452K12.6'	noncoding_pseudogene
10	99173424	99174704	-	CATG00000000566	FANTOM5	'CATG00000000566.1'	noncoding_lncRNA_intergenic
10	99176688	99188414	-	ENSG00000224474	FANTOM5	'AL355490.1'	protein_coding
10	99180952	99181064	-	ENSG00000200737	Ensembl	'Y_RNA'	noncoding_misc_RNA
10	99242426	99242530	+	ENSG00000264677	Ensembl	'AL355490.2'	noncoding_miRNA
10	99299519	99302059	-	CATG00000000571	FANTOM5	'CATG00000000571.1'	noncoding_lncRNA_noncoding_antisense
10	99349478	99350690	+	ENSG00000203942	FANTOM5	'C10orf62'	protein_coding
10	99472924	99478752	+	ENSG00000155254	FANTOM5	'MARVELD1'	protein_coding
10	99520773	99532274	-	ENSG00000120057	FANTOM5	'SFRP5'	protein_coding
10	99545863	99548809	-	CATG00000000577	FANTOM5	'CATG00000000577.1'	noncoding_lncRNA_intergenic
10	99635569	99635654	-	ENSG00000265398	Ensembl	'AL139239.1'	noncoding_miRNA
10	99790573	99793934	+	CATG00000116148	FANTOM5	'CATG00000116148.1'	noncoding_lncRNA_divergent
10	100008589	100022596	+	CATG00000116151	FANTOM5	'CATG00000116151.1'	protein_coding
10	100011780	100016332	+	ENSG00000230928	Ensembl	'RP11-34A14.3'	noncoding_antisense
10	100076698	100077310	+	CATG00000116152	FANTOM5	'CATG00000116152.1'	noncoding_lncRNA_intergenic
10	100154975	100155064	-	ENSG00000221419	Ensembl	'MIR1287'	noncoding_miRNA
10	100191049	100191117	-	ENSG00000264610	Ensembl	'MIR4685'	noncoding_miRNA
10	100206095	100215376	+	CATG00000116155	FANTOM5	'CATG00000116155.1'	noncoding_lncRNA_divergent
10	100772860	100773709	-	ENSG00000236818	Ensembl	'ARL5AP2'	noncoding_pseudogene
10	100807377	100808076	+	ENSG00000234109	FANTOM5	'RPL7P36'	noncoding_pseudogene
10	100995792	100998627	+	CATG00000116160	FANTOM5	'CATG00000116160.1'	noncoding_lncRNA_divergent
10	101157204	101157540	+	CATG00000116161	FANTOM5	'CATG00000116161.1'	noncoding_lncRNA_noncoding_antisense
10	101286838	101288018	+	ENSG00000228778	Ensembl	'RP11-129J12.1'	noncoding_lncRNA_lincRNA
10	101292669	101295088	-	CATG00000000594	FANTOM5	'CATG00000000594.1'	noncoding_lncRNA_divergent
10	101292699	101296284	+	ENSG00000119919	FANTOM5	'NKX2-3'	protein_coding
10	101361537	101361637	+	ENSG00000238588	Ensembl	'snoU13'	noncoding_snoRNA
10	101370283	101380150	+	CATG00000116166	FANTOM5	'CATG00000116166.1'	noncoding_lncRNA_noncoding_antisense
10	101457164	101457706	-	ENSG00000233690	Ensembl	'EBAG9P1'	noncoding_pseudogene
10	101548321	101549167	-	ENSG00000227351	Ensembl	'NANOGP6'	noncoding_pseudogene
10	101779351	101779456	+	ENSG00000238472	Ensembl	'snoU13'	noncoding_snoRNA
10	101817299	101817431	+	CATG00000116175	FANTOM5	'CATG00000116175.1'	noncoding_short_ncRNA
10	101874174	101874980	-	ENSG00000232230	Ensembl	'TPM4P1'	noncoding_pseudogene
10	101902822	101903752	-	ENSG00000270623	Ensembl	'RP11-316M21.9'	noncoding_pseudogene
10	101949793	101950504	+	ENSG00000236308	Ensembl	'RP11-316M21.7'	noncoding_antisense
10	101996913	101997057	-	ENSG00000212464	FANTOM5	'SNORA12'	noncoding_small_RNA
10	102007966	102008852	+	ENSG00000230224	FANTOM5	'PHBP9'	noncoding_pseudogene
10	102018328	102018434	+	ENSG00000207362	Ensembl	'RNU6-422P'	noncoding_snRNA
10	102028610	102030174	-	CATG00000000612	FANTOM5	'CATG00000000612.1'	noncoding_lncRNA_intergenic
10	102046520	102047105	+	CATG00000116184	FANTOM5	'CATG00000116184.1'	noncoding_lncRNA_divergent
10	102129723	102130891	-	CATG00000000617	FANTOM5	'CATG00000000617.1'	noncoding_lncRNA_intergenic
10	102130576	102131951	+	CATG00000116185	FANTOM5	'CATG00000116185.1'	noncoding_lncRNA_intergenic
10	102131925	102133760	-	CATG00000000618	FANTOM5	'CATG00000000618.1'	noncoding_lncRNA_intergenic
10	102158109	102158203	-	ENSG00000212325	Ensembl	'Y_RNA'	noncoding_misc_RNA
10	102172691	102173178	+	ENSG00000273030	Ensembl	'RP11-285F16.1'	noncoding_lncRNA_lincRNA
10	102272299	102274312	-	CATG00000000621	FANTOM5	'CATG00000000621.1'	noncoding_lncRNA_noncoding_sense_intronic
10	102440599	102444994	-	CATG00000000624	FANTOM5	'CATG00000000624.1'	noncoding_lncRNA_intergenic
10	102666931	102667037	-	ENSG00000222072	Ensembl	'Y_RNA'	noncoding_misc_RNA
10	102670860	102673091	-	ENSG00000272572	FANTOM5	'RP11-179B2.2'	noncoding_lncRNA_divergent
10	102734742	102734841	+	ENSG00000207551	Ensembl	'MIR608'	noncoding_miRNA
10	102747300	102754158	+	ENSG00000107815	FANTOM5	'C10orf2'	protein_coding
10	102802699	102804401	+	CATG00000116202	FANTOM5	'CATG00000116202.1'	noncoding_lncRNA_intergenic
10	102882536	102883624	+	ENSG00000269259	Ensembl	'HUG1'	protein_coding
10	102892792	102901104	-	ENSG00000226740	FANTOM5	'RP11-31L23.3'	noncoding_lncRNA_divergent
10	102940901	102941708	-	ENSG00000270973	Ensembl	'RP11-324L3.5'	noncoding_pseudogene
10	102974718	102976521	+	CATG00000116205	FANTOM5	'CATG00000116205.1'	protein_coding
10	102981558	102983949	+	CATG00000116206	FANTOM5	'CATG00000116206.1'	noncoding_lncRNA_intergenic
10	103027694	103027765	-	ENSG00000252844	Ensembl	'SNORD112'	noncoding_snoRNA
10	103043680	103046487	+	CATG00000116207	FANTOM5	'CATG00000116207.1'	noncoding_lncRNA_intergenic
10	103067286	103067475	+	ENSG00000222238	Ensembl	'RNU2-43P'	noncoding_snRNA
10	103070789	103071262	+	ENSG00000225208	FANTOM5	'RP11-107I14.2'	noncoding_lncRNA_intergenic
10	103082242	103083151	-	ENSG00000230967	Ensembl	'RP11-107I14.5'	noncoding_lncRNA_lincRNA
10	103113242	103114201	-	CATG00000000639	FANTOM5	'CATG00000000639.1'	protein_coding
10	103124602	103124790	-	ENSG00000222414	FANTOM5	'RNU2-59P'	noncoding_small_RNA
10	103131609	103131709	-	ENSG00000239091	Ensembl	'snoU13'	noncoding_snoRNA
10	103270556	103272842	+	CATG00000116228	FANTOM5	'CATG00000116228.1'	noncoding_lncRNA_noncoding_sense_intronic
10	103361013	103361254	+	ENSG00000263436	FANTOM5	'MIR3158-1'	noncoding_small_RNA
10	103382616	103382722	+	ENSG00000222051	Ensembl	'RNU6-1165P'	noncoding_snRNA
10	103454136	103464635	+	CATG00000116231	FANTOM5	'CATG00000116231.1'	noncoding_lncRNA_divergent
10	103470343	103470851	+	CATG00000116233	FANTOM5	'CATG00000116233.1'	noncoding_lncRNA_intergenic
10	103488414	103489873	+	CATG00000116235	FANTOM5	'CATG00000116235.1'	noncoding_lncRNA_intergenic
10	103540913	103543155	-	ENSG00000107833	FANTOM5	'NPM3'	protein_coding
10	103547626	103550735	+	CATG00000116240	FANTOM5	'CATG00000116240.1'	noncoding_lncRNA_divergent
10	103712362	103712461	-	ENSG00000222430	Ensembl	'Y_RNA'	noncoding_misc_RNA
10	103816131	103816356	+	CATG00000116243	FANTOM5	'CATG00000116243.1'	noncoding_lncRNA_divergent
10	103845233	103845487	-	ENSG00000224302	Ensembl	'RP11-302K17.3'	noncoding_pseudogene
10	103849725	103849819	+	ENSG00000229629	Ensembl	'RP11-302K17.4'	noncoding_pseudogene
10	103862019	103862089	+	ENSG00000253068	Ensembl	'SNORD112'	noncoding_snoRNA
10	103929429	103930556	+	CATG00000116249	FANTOM5	'CATG00000116249.1'	noncoding_lncRNA_intergenic
10	103989504	104001266	-	ENSG00000107859	FANTOM5	'PITX3'	protein_coding
10	104020987	104021063	+	ENSG00000251989	Ensembl	'AL160011.1'	noncoding_miRNA
10	104153881	104163869	+	ENSG00000077150	FANTOM5	'NFKB2'	protein_coding
10	104156741	104157115	-	CATG00000000660	FANTOM5	'CATG00000000660.1'	noncoding_lncRNA_divergent
10	104186807	104187662	-	CATG00000000662	FANTOM5	'CATG00000000662.1'	noncoding_sense_overlap_RNA
10	104194968	104195318	-	CATG00000000664	FANTOM5	'CATG00000000664.1'	noncoding_lncRNA_intergenic
10	104208745	104213373	-	ENSG00000120055	FANTOM5	'C10orf95'	protein_coding
10	104242796	104243316	+	ENSG00000273262	Ensembl	'RP11-18I14.11'	noncoding_antisense
10	104285722	104286001	+	ENSG00000242311	Ensembl	'RN7SL21P'	noncoding_misc_RNA
10	104332514	104332982	-	ENSG00000228657	Ensembl	'RP11-170J3.2'	noncoding_pseudogene
10	104351281	104351387	+	ENSG00000207029	Ensembl	'RNU6-43P'	noncoding_snRNA
10	104401223	104406462	-	ENSG00000272933	FANTOM5	'RP11-47A8.5'	noncoding_lncRNA_divergent
10	104416712	104416971	-	CATG00000000668	FANTOM5	'CATG00000000668.1'	noncoding_lncRNA_noncoding_antisense
10	104563686	104563788	+	ENSG00000252994	Ensembl	'RNU6-1231P'	noncoding_snRNA
10	104590394	104594773	+	ENSG00000203886	FANTOM5	'CYP17A1-AS1'	noncoding_lncRNA_noncoding_antisense
10	104597768	104605230	-	ENSG00000213061	Ensembl	'PFN1P11'	noncoding_pseudogene
10	104605352	104605707	+	ENSG00000236937	Ensembl	'PTGES3P4'	noncoding_pseudogene
10	104614019	104625987	+	ENSG00000166275	FANTOM5	'C10orf32'	protein_coding
10	104647631	104647945	-	ENSG00000235266	Ensembl	'RP11-753C18.8'	noncoding_pseudogene
10	104674342	104675161	+	ENSG00000272912	Ensembl	'RP11-724N1.1'	noncoding_lncRNA_lincRNA
10	104754855	104758955	+	CATG00000116278	FANTOM5	'CATG00000116278.1'	noncoding_lncRNA_noncoding_sense_intronic
10	104772420	104774723	+	CATG00000116280	FANTOM5	'CATG00000116280.1'	noncoding_lncRNA_noncoding_sense_intronic
10	104876372	104877658	-	CATG00000000681	FANTOM5	'CATG00000000681.1'	noncoding_lncRNA_noncoding_sense_intronic
10	104884774	104887504	-	ENSG00000237827	FANTOM5	'RP11-332O19.2'	noncoding_pseudogene
10	104935300	104935851	+	ENSG00000213277	FANTOM5	'MARCKSL1P1'	noncoding_pseudogene
10	104952385	104955302	+	CATG00000116287	FANTOM5	'CATG00000116287.1'	protein_coding
10	104957171	104957786	+	CATG00000116288	FANTOM5	'CATG00000116288.1'	noncoding_lncRNA_divergent
10	104975459	104976281	-	CATG00000000684	FANTOM5	'CATG00000000684.1'	noncoding_lncRNA_intergenic
10	104975466	104976557	+	ENSG00000229256	Ensembl	'ST13P13'	noncoding_pseudogene
10	104990234	104991055	-	CATG00000000685	FANTOM5	'CATG00000000685.1'	noncoding_lncRNA_intergenic
10	105000653	105001576	-	CATG00000000687	FANTOM5	'CATG00000000687.1'	noncoding_lncRNA_intergenic
10	105005730	105008447	+	ENSG00000235376	FANTOM5	'RP11-332O19.5'	protein_coding
10	105015242	105015612	+	CATG00000116291	FANTOM5	'CATG00000116291.1'	noncoding_lncRNA_noncoding_sense_intronic
10	105038130	105050100	-	CATG00000000690	FANTOM5	'CATG00000000690.1'	noncoding_lncRNA_noncoding_antisense
10	105072193	105072326	-	ENSG00000212413	FANTOM5	'RNU11-3P'	noncoding_small_RNA
10	105110397	105110898	+	CATG00000116292	FANTOM5	'CATG00000116292.1'	protein_coding
10	105154010	105154054	-	ENSG00000221767	FANTOM5	'MIR1307'	noncoding_small_RNA
10	105206540	105212165	-	ENSG00000138172	FANTOM5	'CALHM2'	protein_coding
10	105209762	105210609	+	ENSG00000273485	FANTOM5	'RP11-225H22.7'	noncoding_lncRNA_noncoding_antisense
10	105231361	105234346	+	CATG00000116296	FANTOM5	'CATG00000116296.1'	protein_coding
10	105238641	105239767	+	CATG00000116298	FANTOM5	'CATG00000116298.1'	noncoding_lncRNA_divergent
10	105308821	105310721	+	ENSG00000226431	FANTOM5	'RP11-416N2.3'	noncoding_lncRNA_noncoding_sense_intronic
10	105342627	105344516	-	CATG00000000695	FANTOM5	'CATG00000000695.1'	protein_coding
10	105368376	105369807	+	ENSG00000273108	Ensembl	'RP11-416N2.4'	noncoding_antisense
10	105420699	105421569	+	CATG00000116305	FANTOM5	'CATG00000116305.1'	noncoding_lncRNA_divergent
10	105432916	105433023	+	ENSG00000222503	Ensembl	'Y_RNA'	noncoding_misc_RNA
10	105456489	105459837	+	CATG00000116308	FANTOM5	'CATG00000116308.1'	noncoding_lncRNA_noncoding_antisense
10	105617797	105618094	+	CATG00000116311	FANTOM5	'CATG00000116311.1'	noncoding_lncRNA_intergenic
10	105637132	105639336	-	ENSG00000260461	FANTOM5	'RP11-541N10.3'	noncoding_lncRNA_intergenic
10	105678300	105678956	+	CATG00000116312	FANTOM5	'CATG00000116312.1'	noncoding_lncRNA_divergent
10	105734277	105734572	-	ENSG00000266754	Ensembl	'RN7SL524P'	noncoding_misc_RNA
10	105809521	105809910	+	CATG00000116315	FANTOM5	'CATG00000116315.1'	noncoding_lncRNA_noncoding_antisense
10	105849668	105849912	+	CATG00000116319	FANTOM5	'CATG00000116319.1'	noncoding_lncRNA_intergenic
10	105869292	105869801	-	CATG00000000702	FANTOM5	'CATG00000000702.1'	noncoding_lncRNA_intergenic
10	105877833	105879021	+	CATG00000116321	FANTOM5	'CATG00000116321.1'	noncoding_lncRNA_intergenic
10	105878994	105881660	-	CATG00000000703	FANTOM5	'CATG00000000703.1'	noncoding_lncRNA_divergent
10	105978547	105978641	-	ENSG00000208033	Ensembl	'MIR609'	noncoding_miRNA
10	106008837	106009956	+	CATG00000116324	FANTOM5	'CATG00000116324.1'	noncoding_lncRNA_intergenic
10	106014589	106015609	-	CATG00000000704	FANTOM5	'CATG00000000704.1'	noncoding_lncRNA_divergent
10	106018903	106020539	-	CATG00000000705	FANTOM5	'CATG00000000705.1'	noncoding_lncRNA_noncoding_antisense
10	106021574	106028675	-	ENSG00000266852	FANTOM5	'MIR4482-1'	noncoding_small_RNA
10	106071899	106073639	+	ENSG00000270075	Ensembl	'RP11-127L20.5'	noncoding_antisense
10	106109963	106113329	-	ENSG00000231233	FANTOM5	'CCDC147-AS1'	noncoding_lncRNA_divergent
10	106159563	106159661	+	ENSG00000238620	Ensembl	'snoU13'	noncoding_snoRNA
10	106234697	106240044	-	ENSG00000225768	FANTOM5	'RP11-127O4.3'	noncoding_lncRNA_intergenic
10	106375860	106376731	+	ENSG00000237761	Ensembl	'RP11-127O4.2'	noncoding_lncRNA_lincRNA
10	106383738	106393228	+	CATG00000116338	FANTOM5	'CATG00000116338.1'	noncoding_lncRNA_intergenic
10	106424366	106425974	-	ENSG00000226387	FANTOM5	'SORCS3-AS1'	noncoding_lncRNA_noncoding_antisense
10	107294417	107294523	+	ENSG00000207068	Ensembl	'RNU6-463P'	noncoding_snRNA
10	107445141	107445623	-	ENSG00000233477	Ensembl	'RP11-45P22.2'	noncoding_pseudogene
10	107771300	107773729	+	CATG00000116345	FANTOM5	'CATG00000116345.1'	noncoding_lncRNA_intergenic
10	108309864	108310879	+	ENSG00000215002	Ensembl	'RP11-446H13.2'	noncoding_pseudogene
10	108729779	108729908	+	ENSG00000200626	Ensembl	'RNA5SP325'	noncoding_rRNA
10	109221318	109221427	+	ENSG00000200079	Ensembl	'RNA5SP326'	noncoding_rRNA
10	109305046	109313013	+	CATG00000116357	FANTOM5	'CATG00000116357.1'	noncoding_lncRNA_intergenic
10	109409652	109409900	-	CATG00000000771	FANTOM5	'CATG00000000771.1'	noncoding_lncRNA_intergenic
10	110055857	110056290	+	ENSG00000234544	Ensembl	'PTGES3P5'	noncoding_pseudogene
10	110076840	110079042	-	CATG00000000795	FANTOM5	'CATG00000000795.1'	noncoding_lncRNA_intergenic
10	110666454	110672272	-	CATG00000000815	FANTOM5	'CATG00000000815.1'	noncoding_lncRNA_intergenic
10	110700727	110701068	-	ENSG00000222436	Ensembl	'RN7SKP278'	noncoding_misc_RNA
10	110944651	110944765	-	ENSG00000252574	Ensembl	'RNU5B-6P'	noncoding_snRNA
10	110999397	110999504	+	ENSG00000200217	Ensembl	'RNU6-839P'	noncoding_snRNA
10	111288336	111288766	+	ENSG00000232728	FANTOM5	'PHB2P1'	noncoding_pseudogene
10	111294413	111294748	+	ENSG00000237242	Ensembl	'BTF3P15'	noncoding_pseudogene
10	111421572	111421808	+	ENSG00000270333	Ensembl	'RP11-566F5.2'	noncoding_pseudogene
10	111440200	111440799	+	ENSG00000270294	Ensembl	'RP11-566F5.1'	noncoding_pseudogene
10	111567409	111567887	+	ENSG00000224907	Ensembl	'RP11-451M19.2'	noncoding_pseudogene
10	111624996	111630603	+	ENSG00000272160	FANTOM5	'U4'	noncoding_small_RNA
10	111764012	111764315	+	ENSG00000263706	Ensembl	'RN7SL450P'	noncoding_misc_RNA
10	111825317	111830705	+	CATG00000116384	FANTOM5	'CATG00000116384.1'	noncoding_lncRNA_noncoding_sense_intronic
10	111898972	111899184	-	ENSG00000226734	Ensembl	'SNRPGP12'	noncoding_pseudogene
10	111909206	111910121	+	CATG00000116386	FANTOM5	'CATG00000116386.1'	noncoding_lncRNA_intergenic
10	111972831	111981671	-	CATG00000000836	FANTOM5	'CATG00000000836.1'	noncoding_lncRNA_noncoding_antisense
10	112092240	112093015	+	CATG00000116389	FANTOM5	'CATG00000116389.1'	noncoding_lncRNA_intergenic
10	112138619	112143592	+	CATG00000116392	FANTOM5	'CATG00000116392.1'	noncoding_lncRNA_intergenic
10	112170459	112170604	+	CATG00000116398	FANTOM5	'CATG00000116398.1'	noncoding_short_ncRNA
10	112174401	112176054	+	CATG00000116397	FANTOM5	'CATG00000116397.1'	noncoding_lncRNA_intergenic
10	112183747	112183878	+	CATG00000116402	FANTOM5	'CATG00000116402.1'	noncoding_short_ncRNA
10	112193999	112194143	+	ENSG00000221359	Ensembl	'AL355512.1'	noncoding_miRNA
10	112210387	112210998	+	ENSG00000237642	Ensembl	'HMGB3P5'	noncoding_pseudogene
10	112235255	112235352	-	ENSG00000264544	Ensembl	'AL355512.2'	noncoding_miRNA
10	112302807	112307703	+	CATG00000116406	FANTOM5	'CATG00000116406.1'	noncoding_lncRNA_intergenic
10	112309873	112310612	-	ENSG00000233518	Ensembl	'RPL7P35'	noncoding_pseudogene
10	112326654	112327063	-	CATG00000000854	FANTOM5	'CATG00000000854.1'	noncoding_lncRNA_divergent
10	112336118	112336219	+	ENSG00000239125	Ensembl	'snoU13'	noncoding_snoRNA
10	112393589	112393883	-	ENSG00000263919	Ensembl	'RN7SL686P'	noncoding_misc_RNA
10	112401536	112403938	-	ENSG00000223302	FANTOM5	'Y_RNA'	noncoding_lncRNA_divergent
10	112516214	112516481	+	ENSG00000252036	Ensembl	'RN7SKP288'	noncoding_misc_RNA
10	112520900	112521000	+	ENSG00000199364	Ensembl	'RNA5SP327'	noncoding_rRNA
10	112562161	112568984	+	CATG00000116410	FANTOM5	'CATG00000116410.1'	noncoding_lncRNA_noncoding_sense_intronic
10	112612579	112618474	-	CATG00000000857	FANTOM5	'CATG00000000857.1'	noncoding_lncRNA_intergenic
10	112628927	112631352	+	ENSG00000232470	FANTOM5	'RP11-313D6.3'	noncoding_lncRNA_intergenic
10	112657888	112657913	+	ENSG00000265827	FANTOM5	'MIR4680'	noncoding_small_RNA
10	112670354	112672002	+	ENSG00000270589	Ensembl	'RP11-348N5.7'	noncoding_antisense
10	112696357	112697013	-	ENSG00000234118	FANTOM5	'RPL13AP6'	noncoding_pseudogene
10	112748684	112748771	+	ENSG00000221214	Ensembl	'MIR548E'	noncoding_miRNA
10	112864689	112865006	+	ENSG00000213247	FANTOM5	'RP11-479A21.1'	noncoding_pseudogene
10	112874049	112882163	+	CATG00000116417	FANTOM5	'CATG00000116417.1'	noncoding_lncRNA_intergenic
10	113082536	113083155	+	ENSG00000237618	Ensembl	'BTBD7P2'	noncoding_pseudogene
10	113109697	113111861	-	ENSG00000227851	Ensembl	'RP11-381K7.1'	noncoding_lncRNA_lincRNA
10	113232760	113234215	+	CATG00000116423	FANTOM5	'CATG00000116423.1'	noncoding_lncRNA_intergenic
10	113257949	113258710	-	ENSG00000230809	FANTOM5	'RP11-309P22.1'	noncoding_pseudogene
10	113476785	113479707	-	CATG00000000872	FANTOM5	'CATG00000000872.1'	noncoding_lncRNA_intergenic
10	113542450	113543909	-	CATG00000000875	FANTOM5	'CATG00000000875.1'	noncoding_lncRNA_intergenic
10	113771621	113774021	-	CATG00000000890	FANTOM5	'CATG00000000890.1'	noncoding_lncRNA_intergenic
10	113986072	113986465	-	CATG00000000907	FANTOM5	'CATG00000000907.1'	noncoding_lncRNA_intergenic
10	114110132	114112112	+	CATG00000116434	FANTOM5	'CATG00000116434.1'	noncoding_lncRNA_intergenic
10	114126870	114127200	+	CATG00000116435	FANTOM5	'CATG00000116435.1'	noncoding_lncRNA_intergenic
10	114165977	114169252	-	ENSG00000232934	Ensembl	'RP11-324O2.3'	noncoding_antisense
10	114172053	114179765	-	ENSG00000270599	Ensembl	'RP11-324O2.6'	noncoding_antisense
10	114308391	114308631	-	ENSG00000234017	Ensembl	'RP11-214N15.5'	noncoding_pseudogene
10	114339852	114341311	+	CATG00000116437	FANTOM5	'CATG00000116437.1'	noncoding_sense_overlap_RNA
10	114393929	114394013	+	ENSG00000264763	Ensembl	'MIR4295'	noncoding_miRNA
10	114431571	114437578	-	ENSG00000233340	Ensembl	'RP11-25C19.3'	noncoding_antisense
10	114583249	114587485	+	ENSG00000260917	Ensembl	'RP11-57H14.4'	noncoding_sense_overlapping
10	114635867	114636553	+	CATG00000116442	FANTOM5	'CATG00000116442.1'	noncoding_lncRNA_intergenic
10	114668587	114670519	+	CATG00000116444	FANTOM5	'CATG00000116444.1'	noncoding_lncRNA_intergenic
10	114693964	114694273	+	CATG00000116447	FANTOM5	'CATG00000116447.1'	noncoding_lncRNA_intergenic
10	114747195	114747624	+	ENSG00000227560	FANTOM5	'RP11-139K1.2'	noncoding_pseudogene
10	114921267	114925529	-	CATG00000000920	FANTOM5	'CATG00000000920.1'	noncoding_lncRNA_noncoding_antisense
10	114930992	114932137	+	CATG00000116450	FANTOM5	'CATG00000116450.1'	noncoding_lncRNA_intergenic
10	114939655	114940395	-	CATG00000000924	FANTOM5	'CATG00000000924.1'	noncoding_lncRNA_intergenic
10	115023064	115031824	+	CATG00000116456	FANTOM5	'CATG00000116456.1'	noncoding_lncRNA_noncoding_sense_intronic
10	115026359	115027520	-	CATG00000000926	FANTOM5	'CATG00000000926.1'	noncoding_lncRNA_intergenic
10	115032388	115033381	-	CATG00000000927	FANTOM5	'CATG00000000927.1'	noncoding_lncRNA_intergenic
10	115056897	115062195	+	CATG00000116457	FANTOM5	'CATG00000116457.1'	noncoding_lncRNA_noncoding_sense_intronic
10	115059051	115060487	-	CATG00000000929	FANTOM5	'CATG00000000929.1'	noncoding_lncRNA_intergenic
10	115078996	115080880	-	CATG00000000932	FANTOM5	'CATG00000000932.1'	noncoding_lncRNA_intergenic
10	115084011	115085990	-	CATG00000000933	FANTOM5	'CATG00000000933.1'	noncoding_lncRNA_intergenic
10	115212475	115213295	+	CATG00000116469	FANTOM5	'CATG00000116469.1'	noncoding_sense_overlap_RNA
10	115242375	115242872	+	ENSG00000230018	Ensembl	'RP11-481H12.1'	noncoding_pseudogene
10	115282491	115291897	+	CATG00000116474	FANTOM5	'CATG00000116474.1'	noncoding_lncRNA_intergenic
10	115580218	115580349	+	ENSG00000212589	Ensembl	'SNORA17'	noncoding_snoRNA
10	115674478	115676949	+	ENSG00000234631	FANTOM5	'AL162407.1'	protein_coding
10	115716990	115719291	-	CATG00000000942	FANTOM5	'CATG00000000942.1'	noncoding_lncRNA_intergenic
10	115803625	115809800	+	ENSG00000043591	FANTOM5	'ADRB1'	protein_coding
10	115871173	115871276	+	ENSG00000253066	Ensembl	'RNU6-709P'	noncoding_snRNA
10	115876906	115877310	+	ENSG00000226582	Ensembl	'UBE2V1P5'	noncoding_pseudogene
10	115933864	115933962	-	ENSG00000238742	FANTOM5	'MIR2110'	noncoding_small_RNA
10	116005833	116006473	+	ENSG00000230165	Ensembl	'CTB-1144G6.5'	noncoding_pseudogene
10	116080777	116086655	+	CATG00000116501	FANTOM5	'CATG00000116501.1'	noncoding_lncRNA_divergent
10	116183531	116183826	-	ENSG00000242912	Ensembl	'RN7SL384P'	noncoding_misc_RNA
10	116261756	116262106	-	ENSG00000229668	Ensembl	'RP11-317F20.2'	noncoding_pseudogene
10	116398269	116398658	-	CATG00000000954	FANTOM5	'CATG00000000954.1'	noncoding_lncRNA_noncoding_sense_intronic
10	116416269	116416353	+	ENSG00000238577	Ensembl	'snoU13'	noncoding_snoRNA
10	116449902	116450393	-	ENSG00000228169	Ensembl	'PPIAP19'	noncoding_pseudogene
10	116569134	116570929	+	ENSG00000215760	Ensembl	'TAF9BP2'	noncoding_pseudogene
10	116660439	116661125	+	ENSG00000226428	FANTOM5	'RP11-106M7.4'	noncoding_pseudogene
10	116671111	116686825	+	CATG00000116507	FANTOM5	'CATG00000116507.1'	noncoding_lncRNA_intergenic
10	116729219	116729327	-	ENSG00000252611	Ensembl	'RNU6-1121P'	noncoding_snRNA
10	116754416	116756352	+	ENSG00000236799	Ensembl	'RP11-383C6.2'	noncoding_lncRNA_lincRNA
10	116783756	116784529	+	CATG00000116509	FANTOM5	'CATG00000116509.1'	noncoding_lncRNA_intergenic
10	116796853	116797866	+	CATG00000116510	FANTOM5	'CATG00000116510.1'	noncoding_lncRNA_intergenic
10	116931973	116932561	+	CATG00000116512	FANTOM5	'CATG00000116512.1'	noncoding_lncRNA_noncoding_sense_intronic
10	117579353	117579998	-	ENSG00000270965	Ensembl	'RP11-169K19.1'	noncoding_pseudogene
10	117722629	117725620	+	CATG00000116518	FANTOM5	'CATG00000116518.1'	noncoding_lncRNA_intergenic
10	118033779	118040914	+	CATG00000116526	FANTOM5	'CATG00000116526.1'	noncoding_lncRNA_divergent
10	118154259	118154891	-	CATG00000000973	FANTOM5	'CATG00000000973.1'	noncoding_lncRNA_intergenic
10	118168768	118168987	+	ENSG00000205433	Ensembl	'SNRPGP6'	noncoding_pseudogene
10	118198980	118199583	-	ENSG00000227096	FANTOM5	'HMGB3P8'	noncoding_pseudogene
10	118231663	118232604	-	CATG00000000975	FANTOM5	'CATG00000000975.1'	noncoding_lncRNA_noncoding_antisense
10	118297695	118297788	+	ENSG00000200935	Ensembl	'RNU6-1090P'	noncoding_snRNA
10	118361546	118369259	-	CATG00000000977	FANTOM5	'CATG00000000977.1'	noncoding_lncRNA_noncoding_antisense
10	118429576	118435147	+	ENSG00000232767	FANTOM5	'RP11-498B4.5'	noncoding_lncRNA_divergent
10	118502184	118504804	+	CATG00000116530	FANTOM5	'CATG00000116530.1'	noncoding_lncRNA_divergent
10	118509416	118510772	+	ENSG00000228195	Ensembl	'RPL5P27'	noncoding_pseudogene
10	118529179	118533282	-	CATG00000000984	FANTOM5	'CATG00000000984.1'	noncoding_lncRNA_intergenic
10	118551299	118551769	-	CATG00000000986	FANTOM5	'CATG00000000986.1'	noncoding_lncRNA_intergenic
10	118783185	118783362	-	ENSG00000235742	Ensembl	'RP11-5G18.2'	noncoding_pseudogene
10	118927189	118927285	-	ENSG00000266782	Ensembl	'MIR3663'	noncoding_miRNA
10	118934609	118936812	+	CATG00000116535	FANTOM5	'CATG00000116535.1'	noncoding_lncRNA_intergenic
10	118955679	118956165	-	ENSG00000236171	Ensembl	'RP11-501J20.3'	noncoding_pseudogene
10	118998276	119001508	-	ENSG00000225936	FANTOM5	'RP11-501J20.5'	noncoding_lncRNA_divergent
10	119003517	119003723	-	CATG00000000994	FANTOM5	'CATG00000000994.1'	noncoding_lncRNA_noncoding_antisense
10	119117867	119117967	+	ENSG00000222197	Ensembl	'AL359836.1'	noncoding_miRNA
10	119135061	119137117	+	CATG00000116546	FANTOM5	'CATG00000116546.1'	protein_coding
10	119310777	119311876	-	CATG00000001006	FANTOM5	'CATG00000001006.1'	noncoding_lncRNA_intergenic
10	119522487	119523926	+	CATG00000116562	FANTOM5	'CATG00000116562.1'	noncoding_lncRNA_intergenic
10	119874124	119878414	-	CATG00000001020	FANTOM5	'CATG00000001020.1'	noncoding_lncRNA_intergenic
10	120101887	120102483	+	CATG00000116575	FANTOM5	'CATG00000116575.1'	noncoding_lncRNA_divergent
10	120145605	120146568	+	CATG00000116580	FANTOM5	'CATG00000116580.1'	noncoding_lncRNA_intergenic
10	120300684	120301491	+	CATG00000116586	FANTOM5	'CATG00000116586.1'	noncoding_sense_overlap_RNA
10	120305606	120305676	+	ENSG00000266281	Ensembl	'AL356865.2'	noncoding_miRNA
10	120332383	120333132	+	ENSG00000234309	Ensembl	'SLC25A18P1'	noncoding_pseudogene
10	120390435	120390554	-	ENSG00000263658	Ensembl	'AL356865.1'	noncoding_miRNA
10	120403272	120403710	+	ENSG00000225155	Ensembl	'TOMM22P5'	noncoding_pseudogene
10	120543324	120544391	+	CATG00000116599	FANTOM5	'CATG00000116599.1'	noncoding_lncRNA_intergenic
10	120552387	120552741	+	CATG00000116600	FANTOM5	'CATG00000116600.1'	noncoding_lncRNA_intergenic
10	120572083	120573289	+	CATG00000116601	FANTOM5	'CATG00000116601.1'	noncoding_lncRNA_intergenic
10	120631561	120632114	-	ENSG00000236058	Ensembl	'RP11-215A21.2'	noncoding_pseudogene
10	120692186	120692807	-	ENSG00000213574	Ensembl	'LDHAP5'	noncoding_pseudogene
10	120763048	120763396	-	ENSG00000229272	Ensembl	'RP11-498J9.2'	noncoding_antisense
10	120765302	120765411	+	ENSG00000215925	Ensembl	'AL157788.1'	noncoding_miRNA
10	120789226	120797968	+	ENSG00000188613	FANTOM5	'NANOS1'	protein_coding
10	120801499	120802287	+	CATG00000116605	FANTOM5	'CATG00000116605.1'	protein_coding
10	120819523	120819648	-	ENSG00000207468	FANTOM5	'SNORA19'	noncoding_small_RNA
10	120820495	120820801	-	ENSG00000222588	FANTOM5	'SNORA19'	noncoding_small_RNA
10	120833358	120833452	+	CATG00000116607	FANTOM5	'CATG00000116607.1'	noncoding_short_ncRNA
10	120839741	120843553	+	CATG00000116608	FANTOM5	'CATG00000116608.1'	protein_coding
10	120849736	120850585	-	CATG00000001031	FANTOM5	'CATG00000001031.1'	noncoding_lncRNA_intergenic
10	120852652	120852853	+	ENSG00000271343	Ensembl	'RP11-435O11.5'	noncoding_pseudogene
10	120968032	120971272	+	ENSG00000228485	FANTOM5	'RP11-567J24.4'	noncoding_sense_overlap_RNA
10	120972369	120972656	+	ENSG00000242853	Ensembl	'RN7SL749P'	noncoding_misc_RNA
10	121113466	121116513	+	CATG00000116616	FANTOM5	'CATG00000116616.1'	noncoding_lncRNA_noncoding_sense_intronic
10	121137484	121137555	+	ENSG00000265719	Ensembl	'MIR4681'	noncoding_miRNA
10	121302344	121304070	+	CATG00000116620	FANTOM5	'CATG00000116620.1'	protein_coding
10	121321613	121322042	-	ENSG00000271353	Ensembl	'RP11-179H18.8'	noncoding_pseudogene
10	121368040	121368208	+	CATG00000116622	FANTOM5	'CATG00000116622.1'	noncoding_short_ncRNA
10	121380580	121381392	+	ENSG00000234569	Ensembl	'RAD1P1'	noncoding_pseudogene
10	121397944	121398594	+	ENSG00000227437	FANTOM5	'RP11-179H18.5'	noncoding_pseudogene
10	121409791	121411337	-	CATG00000001041	FANTOM5	'CATG00000001041.1'	noncoding_lncRNA_divergent
10	121430227	121431967	-	CATG00000001044	FANTOM5	'CATG00000001044.1'	noncoding_lncRNA_noncoding_sense_intronic
10	121438238	121442274	+	CATG00000116627	FANTOM5	'CATG00000116627.1'	noncoding_lncRNA_intergenic
10	121442579	121443282	-	ENSG00000232823	FANTOM5	'RP11-179H18.7'	noncoding_pseudogene
10	121452323	121452985	-	CATG00000001046	FANTOM5	'CATG00000001046.1'	noncoding_sense_overlap_RNA
10	121527759	121528052	+	ENSG00000242818	Ensembl	'RN7SL846P'	noncoding_misc_RNA
10	121574741	121576154	-	ENSG00000270300	Ensembl	'PHACTR2P1'	noncoding_pseudogene
10	121632609	121633816	+	CATG00000116635	FANTOM5	'CATG00000116635.1'	noncoding_lncRNA_divergent
10	121718025	121718104	+	ENSG00000265370	Ensembl	'MIR4682'	noncoding_miRNA
10	121756598	121757103	-	ENSG00000180230	FANTOM5	'RP11-198M6.2'	noncoding_pseudogene
10	121829492	121829698	-	ENSG00000223455	FANTOM5	'RP11-781P14.3'	noncoding_pseudogene
10	121883644	121883738	-	ENSG00000221402	Ensembl	'AL353664.1'	noncoding_miRNA
10	121934342	121936312	+	CATG00000116646	FANTOM5	'CATG00000116646.1'	noncoding_sense_overlap_RNA
10	122114177	122114737	-	ENSG00000220842	FANTOM5	'RP11-572P18.1'	noncoding_pseudogene
10	122194495	122199888	+	ENSG00000234522	Ensembl	'RP11-572P18.2'	noncoding_pseudogene
10	122223346	122223443	-	ENSG00000265239	Ensembl	'AC073587.1'	noncoding_miRNA
10	122357721	122359629	+	ENSG00000177234	Ensembl	'C10orf85'	protein_coding
10	122472730	122473456	-	CATG00000001051	FANTOM5	'CATG00000001051.1'	noncoding_lncRNA_intergenic
10	122509545	122510587	+	CATG00000116675	FANTOM5	'CATG00000116675.1'	noncoding_lncRNA_intergenic
10	122638768	122640179	-	ENSG00000271670	Ensembl	'RP11-95I16.4'	noncoding_antisense
10	122713725	122714232	+	CATG00000116687	FANTOM5	'CATG00000116687.1'	noncoding_lncRNA_intergenic
10	122792695	122794007	-	CATG00000001056	FANTOM5	'CATG00000001056.1'	noncoding_lncRNA_intergenic
10	122804691	122805241	-	CATG00000001059	FANTOM5	'CATG00000001059.1'	noncoding_lncRNA_noncoding_sense_intronic
10	122892604	122893270	-	ENSG00000236762	FANTOM5	'RP11-159H3.1'	noncoding_pseudogene
10	122938214	122945480	+	ENSG00000227143	Ensembl	'LINC01153'	noncoding_lncRNA_lincRNA
10	123142464	123143227	+	CATG00000116702	FANTOM5	'CATG00000116702.1'	noncoding_lncRNA_intergenic
10	123170430	123170714	+	ENSG00000222979	Ensembl	'RN7SKP167'	noncoding_misc_RNA
10	123374939	123375353	-	ENSG00000223432	Ensembl	'RP11-62L18.3'	noncoding_lncRNA_lincRNA
10	123473091	123473508	+	ENSG00000223540	FANTOM5	'RPS15AP5'	noncoding_pseudogene
10	123495818	123499245	+	ENSG00000224250	Ensembl	'RP11-78A18.2'	noncoding_antisense
10	123606115	123606215	+	ENSG00000201884	Ensembl	'Y_RNA'	noncoding_misc_RNA
10	123734396	123740032	+	CATG00000116710	FANTOM5	'CATG00000116710.1'	noncoding_lncRNA_divergent
10	123771093	123778708	-	CATG00000001086	FANTOM5	'CATG00000001086.1'	noncoding_lncRNA_divergent
10	123874659	123878779	+	CATG00000116713	FANTOM5	'CATG00000116713.1'	noncoding_short_ncRNA
10	123954386	123954611	-	CATG00000001088	FANTOM5	'CATG00000001088.1'	noncoding_lncRNA_divergent
10	124105205	124105308	+	ENSG00000202245	Ensembl	'RNU6-728P'	noncoding_snRNA
10	124130235	124134702	-	CATG00000001093	FANTOM5	'CATG00000001093.1'	noncoding_lncRNA_divergent
10	124176481	124176583	+	ENSG00000265442	Ensembl	'MIR3941'	noncoding_miRNA
10	124207394	124221566	-	CATG00000001094	FANTOM5	'CATG00000001094.1'	protein_coding
10	124214179	124216868	+	ENSG00000254636	FANTOM5	'ARMS2'	protein_coding
10	124248321	124248514	-	CATG00000001096	FANTOM5	'CATG00000001096.1'	noncoding_short_ncRNA
10	124266202	124266322	-	CATG00000001097	FANTOM5	'CATG00000001097.1'	noncoding_short_ncRNA
10	124399030	124402704	-	CATG00000001099	FANTOM5	'CATG00000001099.1'	noncoding_lncRNA_noncoding_antisense
10	124457225	124459362	-	ENSG00000183559	FANTOM5	'C10orf120'	protein_coding
10	124670126	124673142	+	ENSG00000203795	FANTOM5	'FAM24A'	protein_coding
10	124931048	124931415	-	ENSG00000227586	FANTOM5	'RP11-162A23.5'	noncoding_pseudogene
10	124947669	124956448	+	CATG00000116729	FANTOM5	'CATG00000116729.1'	noncoding_lncRNA_intergenic
10	124975618	124975704	-	ENSG00000265463	Ensembl	'AC012391.1'	noncoding_miRNA
10	125082938	125083102	-	ENSG00000270902	Ensembl	'RP11-338O1.3'	noncoding_pseudogene
10	125185229	125187156	-	ENSG00000225152	Ensembl	'RP11-338O1.2'	noncoding_lncRNA_lincRNA
10	125494301	125494372	-	ENSG00000221293	Ensembl	'AC009987.1'	noncoding_miRNA
10	125536222	125537265	+	ENSG00000231138	FANTOM5	'RP11-391M7.3'	noncoding_lncRNA_noncoding_antisense
10	125650894	125654022	+	CATG00000116746	FANTOM5	'CATG00000116746.1'	noncoding_lncRNA_divergent
10	125670995	125671077	-	ENSG00000221437	Ensembl	'AC068058.1'	noncoding_miRNA
10	125763820	125764344	-	ENSG00000232334	Ensembl	'RP11-47G11.2'	noncoding_pseudogene
10	125805211	125806242	+	CATG00000116751	FANTOM5	'CATG00000116751.1'	noncoding_lncRNA_divergent
10	125852334	125858109	+	CATG00000116753	FANTOM5	'CATG00000116753.1'	protein_coding
10	125955223	125955424	+	CATG00000116755	FANTOM5	'CATG00000116755.1'	noncoding_lncRNA_intergenic
10	125968089	125968608	-	CATG00000001126	FANTOM5	'CATG00000001126.1'	noncoding_lncRNA_noncoding_sense_intronic
10	125974538	125976213	+	CATG00000116757	FANTOM5	'CATG00000116757.1'	noncoding_lncRNA_intergenic
10	125978050	125979695	-	CATG00000001127	FANTOM5	'CATG00000001127.1'	noncoding_lncRNA_noncoding_sense_intronic
10	126027363	126030367	-	CATG00000001131	FANTOM5	'CATG00000001131.1'	protein_coding
10	126029874	126030975	+	CATG00000116759	FANTOM5	'CATG00000116759.1'	noncoding_lncRNA_intergenic
10	126085873	126086675	+	CATG00000116763	FANTOM5	'CATG00000116763.1'	noncoding_lncRNA_noncoding_antisense
10	126132141	126138604	-	ENSG00000229544	FANTOM5	'NKX1-2'	protein_coding
10	126133808	126134344	-	ENSG00000269962	Ensembl	'RP13-238F13.5'	noncoding_lncRNA_lincRNA
10	126136282	126138617	+	ENSG00000271434	Ensembl	'RP13-238F13.3'	noncoding_antisense
10	126454765	126454866	+	ENSG00000199466	Ensembl	'Y_RNA'	noncoding_misc_RNA
10	126480507	126482576	+	CATG00000116767	FANTOM5	'CATG00000116767.1'	noncoding_lncRNA_divergent
10	126493333	126493557	+	ENSG00000203457	Ensembl	'AC068896.1'	noncoding_pseudogene
10	126503527	126503631	-	ENSG00000207494	Ensembl	'Y_RNA'	noncoding_misc_RNA
10	126555985	126557232	+	ENSG00000214807	FANTOM5	'NPM1P31'	noncoding_pseudogene
10	126611081	126612062	+	CATG00000116773	FANTOM5	'CATG00000116773.1'	noncoding_lncRNA_noncoding_sense_intronic
10	126633773	126635001	-	ENSG00000226899	Ensembl	'RP11-298J20.3'	noncoding_antisense
10	126721352	126721439	-	ENSG00000264572	Ensembl	'MIR4296'	noncoding_miRNA
10	126849759	126851535	+	CATG00000116779	FANTOM5	'CATG00000116779.1'	protein_coding
10	126855200	126855506	+	ENSG00000214298	FANTOM5	'MRPS21P6'	noncoding_pseudogene
10	127162255	127162513	-	ENSG00000233135	FANTOM5	'RPS27P18'	noncoding_pseudogene
10	127262968	127267080	+	ENSG00000237675	FANTOM5	'RP11-118H17.1'	noncoding_lncRNA_intergenic
10	127355444	127356636	-	ENSG00000214297	FANTOM5	'ALDOAP2'	noncoding_pseudogene
10	127405947	127408062	-	ENSG00000234134	FANTOM5	'RP11-383C5.5'	noncoding_lncRNA_divergent
10	127455022	127464390	-	ENSG00000154485	Ensembl	'MMP21'	protein_coding
10	127508309	127508391	+	ENSG00000265092	Ensembl	'MIR4484'	noncoding_miRNA
10	127531513	127531598	+	ENSG00000215972	Ensembl	'AL360176.1'	noncoding_miRNA
10	127579135	127579245	-	ENSG00000222629	FANTOM5	'RNU2-42P'	noncoding_small_RNA
10	127648777	127648975	-	ENSG00000234016	Ensembl	'GNG10P1'	noncoding_pseudogene
10	127660757	127661695	-	ENSG00000233409	Ensembl	'FANK1-AS1'	noncoding_antisense
10	127726814	127726971	+	CATG00000116802	FANTOM5	'CATG00000116802.1'	noncoding_short_ncRNA
10	127730703	127732139	+	CATG00000116804	FANTOM5	'CATG00000116804.1'	protein_coding
10	127763981	127773894	+	CATG00000116806	FANTOM5	'CATG00000116806.1'	noncoding_lncRNA_noncoding_antisense
10	127834043	127834151	-	ENSG00000222740	Ensembl	'RNA5SP328'	noncoding_rRNA
10	127961299	127961980	+	ENSG00000213170	FANTOM5	'RP11-81B10.2'	noncoding_pseudogene
10	128077115	128077712	+	CATG00000116814	FANTOM5	'CATG00000116814.1'	noncoding_lncRNA_divergent
10	128093481	128095294	+	CATG00000116816	FANTOM5	'CATG00000116816.1'	noncoding_sense_overlap_RNA
10	128245532	128245633	-	ENSG00000221717	Ensembl	'AL583860.1'	noncoding_miRNA
10	128392775	128393304	-	CATG00000001158	FANTOM5	'CATG00000001158.1'	noncoding_lncRNA_intergenic
10	128468271	128468343	-	ENSG00000199321	Ensembl	'SNORD60'	noncoding_snoRNA
10	128583782	128594760	-	CATG00000001164	FANTOM5	'CATG00000001164.1'	noncoding_lncRNA_divergent
10	128609376	128609472	+	ENSG00000202487	Ensembl	'Y_RNA'	noncoding_misc_RNA
10	128811765	128824771	-	ENSG00000232935	FANTOM5	'RP11-223P11.2'	noncoding_lncRNA_noncoding_sense_intronic
10	128814893	128815268	+	CATG00000116822	FANTOM5	'CATG00000116822.1'	noncoding_lncRNA_noncoding_sense_intronic
10	73723242	73783415	+	ENSG00000122863	FANTOM5	'CHST3'	protein_coding
10	73818678	73848772	-	ENSG00000107742	FANTOM5	'SPOCK2'	protein_coding
10	73975443	73997004	+	ENSG00000166295	FANTOM5	'ANAPC16'	protein_coding
10	74002677	74008738	-	CATG00000000096	FANTOM5	'CATG00000000096.1'	noncoding_lncRNA_intergenic
10	74086552	74114749	-	ENSG00000148719	FANTOM5	'DNAJB12'	protein_coding
10	74653344	74695499	+	ENSG00000138315	FANTOM5	'OIT3'	protein_coding
10	74677103	74678391	-	ENSG00000215086	FANTOM5	'NPM1P24'	noncoding_pseudogene
10	74856786	74860523	+	CATG00000115616	FANTOM5	'CATG00000115616.1'	noncoding_lncRNA_divergent
10	74857802	74861142	-	ENSG00000272630	FANTOM5	'RP11-344N10.5'	noncoding_lncRNA_intergenic
10	74870280	74893128	+	ENSG00000166321	FANTOM5	'NUDT13'	protein_coding
10	74994181	75012377	-	ENSG00000182180	FANTOM5	'MRPS16'	protein_coding
10	75006752	75049075	+	ENSG00000236756	FANTOM5	'DNAJC9-AS1'	noncoding_lncRNA_divergent
10	75119745	75173816	-	ENSG00000138279	FANTOM5	'ANXA7'	protein_coding
10	75183339	75193319	-	ENSG00000166343	FANTOM5	'MSS51'	protein_coding
10	75255479	75279828	+	ENSG00000221817	FANTOM5	'RP11-137L10.6'	noncoding_lncRNA_divergent
10	75391412	75407238	-	ENSG00000177791	FANTOM5	'MYOZ1'	protein_coding
10	75404639	75423561	-	ENSG00000166317	FANTOM5	'SYNPO2L'	protein_coding
10	75407325	75434477	+	ENSG00000271848	FANTOM5	'RP11-464F9.21'	noncoding_lncRNA_divergent
10	75434033	75457639	-	ENSG00000172650	Ensembl	'AGAP5'	protein_coding
10	75454565	75490252	-	ENSG00000271816	FANTOM5	'RP11-574K11.28'	noncoding_lncRNA_divergent
10	75463493	75473339	-	ENSG00000272140	Ensembl	'RP11-574K11.29'	noncoding_lncRNA_lincRNA
10	75475601	75490252	-	ENSG00000242338	FANTOM5	'BMS1P4'	noncoding_pseudogene
10	75504130	75532642	+	ENSG00000176986	FANTOM5	'SEC24C'	protein_coding
10	75543044	75564747	+	ENSG00000214655	FANTOM5	'ZSWIM8'	protein_coding
10	75551433	75574982	-	ENSG00000272916	FANTOM5	'RP11-574K11.31'	protein_coding
10	75561494	75597272	-	ENSG00000166507	FANTOM5	'NDST2'	protein_coding
10	75570427	75588367	+	CATG00000115631	FANTOM5	'CATG00000115631.1'	noncoding_lncRNA_divergent
10	75597230	75621158	+	CATG00000115632	FANTOM5	'CATG00000115632.1'	protein_coding
10	75659598	75661534	+	CATG00000115635	FANTOM5	'CATG00000115635.1'	noncoding_lncRNA_intergenic
10	75666078	75682535	-	ENSG00000222047	FANTOM5	'C10orf55'	protein_coding
10	75764895	75787673	+	ENSG00000225761	Ensembl	'RP11-417O11.5'	noncoding_sense_intronic
10	76762813	76784965	-	ENSG00000234149	FANTOM5	'RP11-77G23.2'	noncoding_lncRNA_divergent
10	76850877	76868945	-	ENSG00000079393	FANTOM5	'DUSP13'	protein_coding
10	76969355	77000965	+	ENSG00000165637	FANTOM5	'VDAC2'	protein_coding
10	77151417	77161522	-	ENSG00000165655	FANTOM5	'ZNF503'	protein_coding
10	77158339	77172240	+	ENSG00000237149	FANTOM5	'ZNF503-AS2'	noncoding_lncRNA_intergenic
10	77158339	77172240	+	ENSG00000272692	FANTOM5	'RP11-399K21.14'	noncoding_lncRNA_intergenic
10	77258678	77318115	+	ENSG00000207583	FANTOM5	'MIR606'	noncoding_small_RNA
10	77758285	77793359	-	CATG00000000175	FANTOM5	'CATG00000000175.1'	noncoding_lncRNA_divergent
10	78020558	78020661	-	ENSG00000201954	Ensembl	'RNU6-673P'	noncoding_snRNA
10	78647065	78770039	+	ENSG00000236467	FANTOM5	'RP11-443A13.5'	noncoding_lncRNA_noncoding_antisense
10	79114162	79136371	+	ENSG00000225652	Ensembl	'RP11-619F23.2'	noncoding_antisense
10	79182782	79190091	+	CATG00000115691	FANTOM5	'CATG00000115691.1'	noncoding_lncRNA_noncoding_antisense
10	79314107	79315391	-	CATG00000000187	FANTOM5	'CATG00000000187.1'	noncoding_sense_overlap_RNA
10	79378547	79396002	+	CATG00000115694	FANTOM5	'CATG00000115694.1'	noncoding_lncRNA_noncoding_antisense
10	79542586	79552934	+	ENSG00000228748	FANTOM5	'RP13-39P12.3'	noncoding_lncRNA_divergent
10	79626643	79672103	+	ENSG00000204049	FANTOM5	'AL391421.1'	protein_coding
10	79728125	79793451	-	ENSG00000148606	FANTOM5	'POLR3A'	protein_coding
10	79793621	79816570	+	ENSG00000138326	FANTOM5	'RPS24'	protein_coding
10	79910761	79936562	-	CATG00000000214	FANTOM5	'CATG00000000214.1'	noncoding_lncRNA_intergenic
10	80416032	80436281	+	CATG00000115723	FANTOM5	'CATG00000115723.1'	noncoding_lncRNA_intergenic
10	80829924	80853047	+	CATG00000115729	FANTOM5	'CATG00000115729.1'	protein_coding
10	81066056	81072735	-	CATG00000000228	FANTOM5	'CATG00000000228.1'	protein_coding
10	81083267	81085304	+	CATG00000115738	FANTOM5	'CATG00000115738.1'	noncoding_lncRNA_intergenic
10	81107225	81121813	+	ENSG00000108179	FANTOM5	'PPIF'	protein_coding
10	81133801	81206622	-	ENSG00000165424	FANTOM5	'ZCCHC24'	protein_coding
10	81142084	81169030	+	ENSG00000235426	Ensembl	'RP11-342M3.5'	noncoding_antisense
10	81205755	81216548	+	CATG00000115745	FANTOM5	'CATG00000115745.1'	protein_coding
10	81319167	81375212	+	ENSG00000122852	FANTOM5	'SFTPA1'	protein_coding
10	81355184	81374940	-	CATG00000000240	FANTOM5	'CATG00000000240.1'	noncoding_lncRNA_intergenic
10	81420647	81437248	+	ENSG00000244733	Ensembl	'RP11-506M13.3'	noncoding_lncRNA_lincRNA
10	81422844	81526085	-	ENSG00000226381	Ensembl	'RP11-119F19.2'	noncoding_antisense
10	81586495	81610830	+	ENSG00000272447	FANTOM5	'RP11-182L21.6'	noncoding_lncRNA_intergenic
10	81601114	81610632	+	ENSG00000228570	Ensembl	'NUTM2E'	protein_coding
10	81664643	81691594	+	ENSG00000242600	FANTOM5	'MBL1P'	noncoding_pseudogene
10	81690321	81742370	-	ENSG00000133661	FANTOM5	'SFTPD'	protein_coding
10	81755553	81778471	-	ENSG00000229616	FANTOM5	'RP11-369J21.11'	noncoding_pseudogene
10	81805952	81838949	-	ENSG00000230091	FANTOM5	'TMEM254-AS1'	noncoding_lncRNA_divergent
10	81838421	81858535	+	ENSG00000133678	FANTOM5	'TMEM254'	protein_coding
10	81891431	81918955	+	ENSG00000189129	FANTOM5	'PLAC9'	protein_coding
10	81967196	81984752	+	ENSG00000237523	FANTOM5	'LINC00857'	noncoding_lncRNA_intergenic
10	81993420	82005123	+	ENSG00000234382	Ensembl	'RP11-40F6.1'	noncoding_pseudogene
10	82026771	82049871	-	ENSG00000151224	FANTOM5	'MAT1A'	protein_coding
10	82081210	82116944	-	ENSG00000170788	FANTOM5	'DYDC1'	protein_coding
10	82116063	82128950	+	ENSG00000133665	FANTOM5	'DYDC2'	protein_coding
10	82146853	82168173	-	CATG00000000247	FANTOM5	'CATG00000000247.1'	noncoding_lncRNA_divergent
10	82214038	82293549	+	ENSG00000108219	FANTOM5	'TSPAN14'	protein_coding
10	82409291	82413488	+	ENSG00000231082	FANTOM5	'RP11-514F8.2'	noncoding_lncRNA_intergenic
10	82509388	82510987	-	ENSG00000233703	Ensembl	'RP11-20E23.1'	noncoding_pseudogene
10	83983884	83992651	-	ENSG00000225738	FANTOM5	'NRG3-AS1'	noncoding_lncRNA_noncoding_antisense
10	83983969	83988935	-	ENSG00000229458	Ensembl	'RP11-202D18.2'	noncoding_antisense
10	85469577	85484595	-	CATG00000000273	FANTOM5	'CATG00000000273.1'	noncoding_lncRNA_intergenic
10	85671410	85672678	-	ENSG00000233258	Ensembl	'RP11-219F10.1'	noncoding_lncRNA_lincRNA
10	85899265	85914740	+	ENSG00000165678	FANTOM5	'GHITM'	protein_coding
10	85901168	85902449	-	CATG00000000280	FANTOM5	'CATG00000000280.1'	noncoding_lncRNA_divergent
10	85912932	85931848	-	CATG00000000282	FANTOM5	'CATG00000000282.1'	noncoding_lncRNA_intergenic
10	85933557	85945050	+	ENSG00000188373	FANTOM5	'C10orf99'	protein_coding
10	85954296	85979777	+	ENSG00000148600	FANTOM5	'CDHR1'	protein_coding
10	85987564	86001271	-	ENSG00000148602	FANTOM5	'LRIT1'	protein_coding
10	85990420	86023693	+	ENSG00000148604	FANTOM5	'RGR'	protein_coding
10	86039736	86054415	+	ENSG00000229404	Ensembl	'LINC00858'	noncoding_lncRNA_lincRNA
10	86785231	86802641	+	CATG00000115841	FANTOM5	'CATG00000115841.1'	protein_coding
10	86903539	86929925	-	CATG00000000287	FANTOM5	'CATG00000000287.1'	noncoding_lncRNA_intergenic
10	87192619	87208718	+	ENSG00000224504	Ensembl	'RP11-475D12.2'	noncoding_lncRNA_lincRNA
10	87209349	87251753	+	ENSG00000230962	Ensembl	'RP11-113E21.1'	noncoding_lncRNA_lincRNA
10	87337520	87367158	+	ENSG00000234942	FANTOM5	'RP11-93H12.2'	noncoding_lncRNA_intergenic
10	88153574	88162943	-	CATG00000000314	FANTOM5	'CATG00000000314.1'	noncoding_lncRNA_intergenic
10	88159803	88166054	+	CATG00000115856	FANTOM5	'CATG00000115856.1'	protein_coding
10	88281717	88294852	+	ENSG00000227896	FANTOM5	'RP11-77P6.2'	noncoding_lncRNA_divergent
10	88414304	88426605	+	ENSG00000122375	FANTOM5	'OPN4'	protein_coding
10	88493648	88517253	-	ENSG00000272631	FANTOM5	'RP11-359E3.4'	noncoding_lncRNA_divergent
10	88681056	88729987	-	ENSG00000173269	FANTOM5	'MMRN2'	protein_coding
10	88714363	88723342	+	ENSG00000173267	FANTOM5	'SNCG'	protein_coding
10	88752010	88760192	+	ENSG00000240089	Ensembl	'BMS1P3'	noncoding_pseudogene
10	88761393	88769662	+	ENSG00000261011	Ensembl	'RP11-96C23.11'	noncoding_pseudogene
10	88780051	88793230	+	ENSG00000188100	FANTOM5	'FAM25A'	protein_coding
10	88799877	88808414	-	ENSG00000200253	FANTOM5	'RNU6-529P'	noncoding_small_RNA
10	88809117	88854778	-	ENSG00000148672	FANTOM5	'GLUD1'	protein_coding
10	89102172	89126817	+	ENSG00000224914	FANTOM5	'LINC00863'	noncoding_lncRNA_intergenic
10	89156780	89184549	-	ENSG00000228055	Ensembl	'LINC00864'	noncoding_lncRNA_lincRNA
10	89209819	89211271	+	CATG00000115875	FANTOM5	'CATG00000115875.1'	noncoding_lncRNA_intergenic
10	89264632	89314989	+	ENSG00000107789	FANTOM5	'MINPP1'	protein_coding
10	89351364	89365781	-	ENSG00000223761	Ensembl	'RP11-57C13.4'	noncoding_lncRNA_lincRNA
10	89419635	89516922	+	ENSG00000198682	FANTOM5	'PAPSS2'	protein_coding
10	89578032	89605369	+	ENSG00000223820	FANTOM5	'CFL1P1'	noncoding_pseudogene
10	89618493	89623064	-	ENSG00000227268	FANTOM5	'KLLN'	protein_coding
10	89634759	89640427	+	ENSG00000224745	FANTOM5	'RP11-380G5.2'	noncoding_lncRNA_noncoding_sense_intronic
10	89821802	89864150	-	CATG00000000335	FANTOM5	'CATG00000000335.1'	noncoding_lncRNA_intergenic
10	90342681	90382915	+	ENSG00000204022	FANTOM5	'LIPJ'	protein_coding
10	90466006	90513741	+	CATG00000115920	FANTOM5	'CATG00000115920.1'	protein_coding
10	90484301	90512543	+	ENSG00000204021	Ensembl	'LIPK'	protein_coding
10	90519739	90543459	+	ENSG00000204020	FANTOM5	'LIPN'	protein_coding
10	90579660	90628808	-	ENSG00000152766	FANTOM5	'ANKRD22'	protein_coding
10	90636207	90637301	+	ENSG00000234256	Ensembl	'PTCD2P2'	noncoding_pseudogene
10	90713573	90795918	+	ENSG00000026103	FANTOM5	'FAS'	protein_coding
10	90875184	90902271	+	ENSG00000233292	FANTOM5	'RP11-341B24.3'	noncoding_pseudogene
10	91020476	91052518	+	ENSG00000232110	FANTOM5	'RP11-149I23.3'	noncoding_lncRNA_noncoding_antisense
10	91061803	91070194	+	ENSG00000119922	FANTOM5	'IFIT2'	protein_coding
10	91137813	91144962	+	ENSG00000204010	FANTOM5	'IFIT1B'	protein_coding
10	91151880	91184746	+	ENSG00000185745	FANTOM5	'IFIT1'	protein_coding
10	91172276	91184746	+	ENSG00000152778	FANTOM5	'IFIT5'	protein_coding
10	91294074	91352865	+	CATG00000115944	FANTOM5	'CATG00000115944.1'	noncoding_lncRNA_divergent
10	91405027	91413119	+	ENSG00000232936	FANTOM5	'RP11-80H5.2'	noncoding_lncRNA_divergent
10	91406046	91410579	-	ENSG00000225836	Ensembl	'RP11-80H5.6'	noncoding_lncRNA_lincRNA
10	91426938	91459428	-	ENSG00000235100	Ensembl	'RP11-80H5.9'	noncoding_lncRNA_lincRNA
10	91446670	91461208	-	ENSG00000240996	FANTOM5	'RP11-80H5.7'	noncoding_lncRNA_divergent
10	91567059	91600894	+	ENSG00000232229	FANTOM5	'LINC00865'	noncoding_lncRNA_intergenic
10	91675246	91717130	-	ENSG00000226159	Ensembl	'RP11-478K7.2'	noncoding_lncRNA_lincRNA
10	92055067	92067071	+	CATG00000115970	FANTOM5	'CATG00000115970.1'	noncoding_lncRNA_intergenic
10	92173197	92185658	+	CATG00000115971	FANTOM5	'CATG00000115971.1'	noncoding_lncRNA_intergenic
10	92213927	92262725	+	ENSG00000224750	Ensembl	'RP11-94M14.2'	noncoding_lncRNA_lincRNA
10	92222783	92264283	+	ENSG00000238291	FANTOM5	'RP11-94M14.3'	noncoding_lncRNA_intergenic
10	92322761	92353184	+	CATG00000115973	FANTOM5	'CATG00000115973.1'	noncoding_short_ncRNA
10	92684156	92690802	-	CATG00000000413	FANTOM5	'CATG00000000413.1'	noncoding_lncRNA_intergenic
10	92706985	92771344	+	ENSG00000225519	FANTOM5	'RP11-236B18.2'	noncoding_lncRNA_intergenic
10	92806923	92821916	+	ENSG00000224851	Ensembl	'LINC00502'	noncoding_lncRNA_lincRNA
10	92906577	92923824	-	ENSG00000234043	FANTOM5	'RP11-56M3.1'	noncoding_pseudogene
10	93174291	93177436	+	CATG00000116000	FANTOM5	'CATG00000116000.1'	noncoding_sense_overlap_RNA
10	93380062	93392828	-	ENSG00000119938	FANTOM5	'PPP1R3C'	protein_coding
10	93541170	93558093	-	ENSG00000228701	FANTOM5	'TNKS2-AS1'	noncoding_lncRNA_divergent
10	93663068	93669243	-	ENSG00000174721	FANTOM5	'FGFBP3'	protein_coding
10	93896632	93898127	+	ENSG00000213484	Ensembl	'EIF4A1P8'	noncoding_pseudogene
10	94415800	94429605	-	ENSG00000236493	FANTOM5	'EIF2S2P3'	noncoding_pseudogene
10	94430275	94449509	-	CATG00000000459	FANTOM5	'CATG00000000459.1'	noncoding_lncRNA_divergent
10	94449712	94455542	+	ENSG00000152804	FANTOM5	'HHEX'	protein_coding
10	94994043	94995631	-	CATG00000000467	FANTOM5	'CATG00000000467.1'	noncoding_lncRNA_intergenic
10	95040920	95082494	+	CATG00000116040	FANTOM5	'CATG00000116040.1'	noncoding_lncRNA_intergenic
10	95326422	95364237	+	ENSG00000186188	FANTOM5	'FFAR4'	protein_coding
10	95346983	95360992	-	ENSG00000138207	FANTOM5	'RBP4'	protein_coding
10	95500450	95517484	-	CATG00000000487	FANTOM5	'CATG00000000487.1'	noncoding_lncRNA_divergent
10	95557919	95579367	-	CATG00000000490	FANTOM5	'CATG00000000490.1'	noncoding_lncRNA_intergenic
10	95841707	95868537	-	ENSG00000232913	FANTOM5	'RP11-429H9.4'	noncoding_lncRNA_noncoding_antisense
10	95868873	95880864	+	ENSG00000231575	Ensembl	'RP11-162K11.4'	noncoding_sense_intronic
10	96031438	96046804	-	ENSG00000268894	FANTOM5	'PLCE1-AS1'	noncoding_lncRNA_noncoding_antisense
10	96304876	96305470	-	CATG00000000495	FANTOM5	'CATG00000000495.1'	noncoding_lncRNA_divergent
10	96625609	96632886	-	ENSG00000235199	Ensembl	'CYP2C58P'	noncoding_pseudogene
10	96794116	96829254	-	ENSG00000138115	FANTOM5	'CYP2C8'	protein_coding
10	96901682	96928182	-	ENSG00000231829	Ensembl	'RP11-310E22.5'	noncoding_lncRNA_lincRNA
10	96928580	96990888	-	ENSG00000234026	FANTOM5	'RP11-310E22.4'	noncoding_lncRNA_intergenic
10	96953968	96988843	+	ENSG00000173124	FANTOM5	'C10orf129'	protein_coding
10	96959522	96963613	-	CATG00000000512	FANTOM5	'CATG00000000512.1'	noncoding_lncRNA_noncoding_antisense
10	96995359	97055659	-	ENSG00000107438	FANTOM5	'PDLIM1'	protein_coding
10	97418358	97453711	-	ENSG00000119977	FANTOM5	'TCTN3'	protein_coding
10	97498558	97515813	-	CATG00000000522	FANTOM5	'CATG00000000522.1'	noncoding_lncRNA_divergent
10	97593265	97633515	+	ENSG00000240527	Ensembl	'RP11-429G19.3'	noncoding_sense_intronic
10	97667373	97728539	+	ENSG00000173088	FANTOM5	'C10orf131'	protein_coding
10	97709725	97744785	+	ENSG00000269948	Ensembl	'RP11-248J23.6'	protein_coding
10	97802825	97827969	+	ENSG00000107443	FANTOM5	'CCNJ'	protein_coding
10	97948641	98032573	-	ENSG00000095585	FANTOM5	'BLNK'	protein_coding
10	98052442	98066424	-	ENSG00000229418	FANTOM5	'RP11-35J23.1'	noncoding_lncRNA_intergenic
10	98102905	98118759	-	ENSG00000197430	FANTOM5	'OPALIN'	protein_coding
10	98311115	98332253	+	ENSG00000235677	FANTOM5	'NPM1P26'	noncoding_pseudogene
10	98346848	98390283	+	CATG00000116100	FANTOM5	'CATG00000116100.1'	noncoding_lncRNA_divergent
10	98497300	98511151	+	ENSG00000236552	FANTOM5	'RPL13AP5'	noncoding_pseudogene
10	98978996	99052394	-	ENSG00000213390	FANTOM5	'ARHGAP19'	protein_coding
10	99068533	99078717	-	ENSG00000237169	FANTOM5	'RP11-452K12.3'	noncoding_pseudogene
10	99116115	99161053	-	ENSG00000052749	FANTOM5	'RRP12'	protein_coding
10	99160284	99179281	+	ENSG00000231970	FANTOM5	'RP11-452K12.7'	noncoding_lncRNA_divergent
10	99185948	99194715	+	ENSG00000171314	FANTOM5	'PGAM1'	protein_coding
10	99195899	99205749	-	ENSG00000171311	FANTOM5	'EXOSC1'	protein_coding
10	99331681	99343651	+	ENSG00000165887	FANTOM5	'ANKRD2'	protein_coding
10	99371970	99393892	-	ENSG00000171160	FANTOM5	'MORN4'	protein_coding
10	99432383	99448087	-	ENSG00000119986	FANTOM5	'AVPI1'	protein_coding
10	99447381	99451092	+	CATG00000116137	FANTOM5	'CATG00000116137.1'	noncoding_lncRNA_divergent
10	99496885	99544698	+	ENSG00000155256	FANTOM5	'ZFYVE27'	protein_coding
10	99578643	99609543	-	ENSG00000227356	FANTOM5	'LINC00866'	noncoding_lncRNA_divergent
10	99627889	99631294	+	ENSG00000269783	Ensembl	'GOLGA7B'	protein_coding
10	100121009	100128682	+	CATG00000116153	FANTOM5	'CATG00000116153.1'	noncoding_lncRNA_intergenic
10	100139938	100174918	-	ENSG00000119943	FANTOM5	'PYROXD2'	protein_coding
10	100175947	100206672	-	ENSG00000107521	FANTOM5	'HPS1'	protein_coding
10	101088856	101154382	+	ENSG00000119946	FANTOM5	'CNNM1'	protein_coding
10	101190693	101226226	+	ENSG00000224934	FANTOM5	'RP11-441O15.3'	noncoding_lncRNA_divergent
10	101281412	101292538	-	ENSG00000257582	FANTOM5	'RP11-129J12.2'	noncoding_lncRNA_divergent
10	101369512	101419006	-	ENSG00000155287	FANTOM5	'SLC25A28'	protein_coding
10	101380614	101384749	+	ENSG00000260475	FANTOM5	'RP11-85A1.3'	noncoding_lncRNA_divergent
10	101404270	101419006	-	ENSG00000229278	FANTOM5	'RP11-483F11.7'	noncoding_lncRNA_divergent
10	101908122	101945786	-	ENSG00000107566	FANTOM5	'ERLIN1'	protein_coding
10	101945939	101958089	+	CATG00000116182	FANTOM5	'CATG00000116182.1'	noncoding_lncRNA_divergent
10	101988828	101998530	+	ENSG00000227492	FANTOM5	'RP11-316M21.6'	noncoding_lncRNA_divergent
10	101991985	102027437	-	ENSG00000095485	FANTOM5	'CWF19L1'	protein_coding
10	102033713	102046435	-	ENSG00000196072	FANTOM5	'BLOC1S2'	protein_coding
10	102047903	102090285	-	ENSG00000107593	FANTOM5	'PKD2L1'	protein_coding
10	102105663	102125626	+	ENSG00000099194	FANTOM5	'SCD'	protein_coding
10	102120490	102124581	-	CATG00000000615	FANTOM5	'CATG00000000615.1'	noncoding_lncRNA_divergent
10	102121431	102123376	+	ENSG00000256545	FANTOM5	'AL139819.1'	noncoding_pseudogene
10	102133279	102167899	+	ENSG00000235823	FANTOM5	'LINC00263'	noncoding_lncRNA_intergenic
10	102265295	102289627	-	ENSG00000255339	FANTOM5	'NDUFB8'	protein_coding
10	102283584	102286311	+	CATG00000116191	FANTOM5	'CATG00000116191.1'	noncoding_lncRNA_divergent
10	102288824	102331785	+	ENSG00000166135	FANTOM5	'HIF1AN'	protein_coding
10	102646634	102729082	+	ENSG00000119906	FANTOM5	'FAM178A'	protein_coding
10	102727445	102727892	+	ENSG00000273476	Ensembl	'RP11-108L7.14'	noncoding_lncRNA_lincRNA
10	102727617	102749027	-	ENSG00000055950	FANTOM5	'MRPL43'	protein_coding
10	102729261	102745628	+	ENSG00000095539	FANTOM5	'SEMA4G'	protein_coding
10	102740264	102745371	-	ENSG00000236662	Ensembl	'RP11-108L7.4'	noncoding_antisense
10	102790991	102801200	+	ENSG00000107819	FANTOM5	'SFXN3'	protein_coding
10	102804632	102827754	-	ENSG00000273162	FANTOM5	'RP11-108L7.15'	noncoding_lncRNA_intergenic
10	102810263	102847450	+	ENSG00000107821	FANTOM5	'KAZALD1'	protein_coding
10	102936080	102953904	+	ENSG00000237579	Ensembl	'RP11-324L3.1'	noncoding_lncRNA_lincRNA
10	102985953	102990131	-	ENSG00000138136	FANTOM5	'LBX1'	protein_coding
10	102989307	103000629	+	ENSG00000227128	FANTOM5	'LBX1-AS1'	noncoding_lncRNA_divergent
10	103324826	103348266	-	ENSG00000166169	FANTOM5	'POLL'	protein_coding
10	103330205	103382169	+	ENSG00000166171	FANTOM5	'DPCD'	protein_coding
10	103464409	103468158	-	ENSG00000224817	Ensembl	'RP11-190J1.3'	noncoding_lncRNA_lincRNA
10	103503658	103526787	-	CATG00000000645	FANTOM5	'CATG00000000645.1'	noncoding_lncRNA_intergenic
10	103529899	103535871	-	ENSG00000107831	FANTOM5	'FGF8'	protein_coding
10	103578525	103589356	+	ENSG00000226009	FANTOM5	'KCNIP2-AS1'	noncoding_lncRNA_divergent
10	103578567	103603551	-	ENSG00000120049	FANTOM5	'KCNIP2'	protein_coding
10	103611563	103670100	+	CATG00000116242	FANTOM5	'CATG00000116242.1'	noncoding_lncRNA_noncoding_antisense
10	103825128	103833168	+	ENSG00000166189	FANTOM5	'HPS6'	protein_coding
10	103859602	103881187	-	ENSG00000198728	FANTOM5	'LDB1'	protein_coding
10	103879646	103910605	+	ENSG00000148840	FANTOM5	'PPRC1'	protein_coding
10	103911955	103924491	+	ENSG00000166197	FANTOM5	'NOLC1'	protein_coding
10	103986056	103989433	+	ENSG00000119915	FANTOM5	'ELOVL3'	protein_coding
10	104134342	104155345	-	CATG00000000659	FANTOM5	'CATG00000000659.1'	noncoding_lncRNA_divergent
10	104157260	104181716	-	ENSG00000059915	FANTOM5	'PSD'	protein_coding
10	104178416	104188633	+	ENSG00000107872	FANTOM5	'FBXL15'	protein_coding
10	104182926	104192423	-	ENSG00000107874	FANTOM5	'CUEDC2'	protein_coding
10	104209596	104220863	+	ENSG00000269609	FANTOM5	'RP11-18I14.10'	noncoding_lncRNA_divergent
10	104221152	104244396	+	ENSG00000138111	FANTOM5	'TMEM180'	protein_coding
10	104238112	104262469	-	ENSG00000138107	FANTOM5	'ACTR1A'	protein_coding
10	104402075	104423060	+	ENSG00000171206	FANTOM5	'TRIM8'	protein_coding
10	104474393	104507714	+	ENSG00000156398	FANTOM5	'SFXN2'	protein_coding
10	104503705	104588644	+	ENSG00000166272	FANTOM5	'WBP1L'	protein_coding
10	104614019	104663897	+	ENSG00000270316	FANTOM5	'C10orf32-ASMT'	protein_coding
10	104628178	104628276	+	ENSG00000201080	Ensembl	'RNU6-372P'	noncoding_snRNA
10	104629227	104670712	+	ENSG00000214435	FANTOM5	'AS3MT'	protein_coding
10	104660175	104677677	-	CATG00000000670	FANTOM5	'CATG00000000670.1'	noncoding_lncRNA_divergent
10	104737983	104742954	+	CATG00000116275	FANTOM5	'CATG00000116275.1'	noncoding_lncRNA_noncoding_sense_intronic
10	105001433	105021044	+	CATG00000116290	FANTOM5	'CATG00000116290.1'	noncoding_lncRNA_intergenic
10	105036895	105050108	+	ENSG00000148798	FANTOM5	'INA'	protein_coding
10	105062480	105110874	-	ENSG00000156374	FANTOM5	'PCGF6'	protein_coding
10	105127733	105153262	+	ENSG00000148835	FANTOM5	'TAF5'	protein_coding
10	105144123	105156210	-	ENSG00000173915	FANTOM5	'USMG5'	protein_coding
10	105156400	105208066	+	ENSG00000148843	FANTOM5	'PDCD11'	protein_coding
10	105212210	105222452	+	ENSG00000234699	FANTOM5	'RP11-225H22.4'	noncoding_lncRNA_divergent
10	105213144	105218657	-	ENSG00000185933	FANTOM5	'CALHM1'	protein_coding
10	105232561	105239001	-	ENSG00000183128	FANTOM5	'CALHM3'	protein_coding
10	105253470	105372691	+	ENSG00000107954	FANTOM5	'NEURL'	protein_coding
10	105272254	105290002	+	CATG00000116299	FANTOM5	'CATG00000116299.1'	noncoding_lncRNA_noncoding_sense_intronic
10	105696445	105726783	-	CATG00000000700	FANTOM5	'CATG00000000700.1'	noncoding_lncRNA_divergent
10	105789980	105846227	-	ENSG00000065618	FANTOM5	'COL17A1'	protein_coding
10	105807847	105807944	-	ENSG00000216083	Ensembl	'MIR936'	noncoding_miRNA
10	106013931	106029874	+	ENSG00000148834	FANTOM5	'GSTO1'	protein_coding
10	106062221	106099795	-	ENSG00000148841	FANTOM5	'ITPRIP'	protein_coding
10	106082616	106089846	+	ENSG00000228261	FANTOM5	'RP11-127L20.3'	noncoding_lncRNA_noncoding_antisense
10	106326714	106347031	+	CATG00000116335	FANTOM5	'CATG00000116335.1'	noncoding_lncRNA_intergenic
10	107445983	107447542	+	ENSG00000213260	FANTOM5	'YWHAZP5'	noncoding_pseudogene
10	107510895	107512758	-	CATG00000000720	FANTOM5	'CATG00000000720.1'	noncoding_lncRNA_noncoding_sense_intronic
10	107568533	107578955	-	ENSG00000229466	Ensembl	'RP11-56I23.1'	noncoding_lncRNA_lincRNA
10	107830986	107843421	-	CATG00000000728	FANTOM5	'CATG00000000728.1'	noncoding_lncRNA_intergenic
10	107900022	107948480	+	ENSG00000229775	Ensembl	'RP11-298H24.1'	noncoding_lncRNA_lincRNA
10	108045247	108083285	+	CATG00000116348	FANTOM5	'CATG00000116348.1'	noncoding_lncRNA_intergenic
10	108182482	108183794	-	CATG00000000736	FANTOM5	'CATG00000000736.1'	noncoding_lncRNA_intergenic
10	108408543	108438300	+	CATG00000116352	FANTOM5	'CATG00000116352.1'	noncoding_lncRNA_noncoding_antisense
10	109237303	109265031	+	CATG00000116356	FANTOM5	'CATG00000116356.1'	noncoding_lncRNA_intergenic
10	109412048	109413936	-	CATG00000000772	FANTOM5	'CATG00000000772.1'	noncoding_lncRNA_intergenic
10	109449338	109473159	+	CATG00000116359	FANTOM5	'CATG00000116359.1'	noncoding_lncRNA_intergenic
10	109673557	109678406	+	CATG00000116360	FANTOM5	'CATG00000116360.1'	protein_coding
10	110179628	110182920	-	ENSG00000229981	FANTOM5	'RP11-215N21.1'	noncoding_lncRNA_intergenic
10	110607944	110609319	+	ENSG00000224498	Ensembl	'MAPKAPK5P1'	noncoding_pseudogene
10	111160774	111171770	-	CATG00000000828	FANTOM5	'CATG00000000828.1'	noncoding_lncRNA_intergenic
10	111459808	111461571	+	CATG00000116379	FANTOM5	'CATG00000116379.1'	noncoding_lncRNA_intergenic
10	111701029	111768348	-	ENSG00000203876	FANTOM5	'RP11-451M19.3'	protein_coding
10	111967391	112063299	+	ENSG00000119950	FANTOM5	'MXI1'	protein_coding
10	111967608	111968718	-	ENSG00000228417	FANTOM5	'RP11-549L6.3'	noncoding_lncRNA_divergent
10	112016822	112017601	+	ENSG00000214067	Ensembl	'RP11-549L6.2'	noncoding_pseudogene
10	112039671	112064678	-	ENSG00000119953	FANTOM5	'SMNDC1'	protein_coding
10	112180672	112181257	+	CATG00000116400	FANTOM5	'CATG00000116400.1'	noncoding_lncRNA_intergenic
10	112628501	112641138	-	ENSG00000203497	FANTOM5	'PDCD4-AS1'	noncoding_lncRNA_divergent
10	112631686	112673308	+	ENSG00000150593	FANTOM5	'PDCD4'	protein_coding
10	112648729	112679745	-	ENSG00000214413	FANTOM5	'BBIP1'	protein_coding
10	112836154	112840982	+	ENSG00000150594	FANTOM5	'ADRA2A'	protein_coding
10	113190130	113209225	+	CATG00000116421	FANTOM5	'CATG00000116421.1'	noncoding_lncRNA_intergenic
10	113588953	113592742	-	CATG00000000879	FANTOM5	'CATG00000000879.1'	noncoding_lncRNA_intergenic
10	113834860	113843172	-	CATG00000000897	FANTOM5	'CATG00000000897.1'	noncoding_lncRNA_intergenic
10	114186976	114207330	-	ENSG00000023041	FANTOM5	'ZDHHC6'	protein_coding
10	114517144	114545225	+	CATG00000116439	FANTOM5	'CATG00000116439.1'	noncoding_lncRNA_noncoding_sense_intronic
10	114648494	114665870	+	ENSG00000225292	Ensembl	'RP11-57H14.3'	noncoding_sense_intronic
10	114703522	114711747	-	ENSG00000233547	FANTOM5	'RP11-57H14.2'	noncoding_lncRNA_divergent
10	115242782	115252583	-	CATG00000000936	FANTOM5	'CATG00000000936.1'	noncoding_lncRNA_intergenic
10	115347876	115423800	-	ENSG00000197893	FANTOM5	'NRAP'	protein_coding
10	115511070	115543361	+	ENSG00000148735	FANTOM5	'PLEKHS1'	protein_coding
10	115568333	115575406	+	CATG00000116480	FANTOM5	'CATG00000116480.1'	noncoding_lncRNA_intergenic
10	115614420	115679468	+	ENSG00000196865	FANTOM5	'NHLRC2'	protein_coding
10	115781400	115803452	-	CATG00000000944	FANTOM5	'CATG00000000944.1'	noncoding_lncRNA_divergent
10	115786478	115809552	+	CATG00000116489	FANTOM5	'CATG00000116489.1'	protein_coding
10	115875263	115933962	-	ENSG00000165813	FANTOM5	'C10orf118'	protein_coding
10	115939048	115992684	+	ENSG00000095627	FANTOM5	'TDRD1'	protein_coding
10	115999013	116057605	+	ENSG00000165816	FANTOM5	'VWA2'	protein_coding
10	116468896	116477941	-	CATG00000000960	FANTOM5	'CATG00000000960.1'	noncoding_lncRNA_intergenic
10	116524703	116540382	+	ENSG00000228484	FANTOM5	'RP11-106M7.1'	noncoding_lncRNA_intergenic
10	116697971	116752718	+	ENSG00000165832	FANTOM5	'TRUB1'	protein_coding
10	118305443	118327367	+	ENSG00000175535	FANTOM5	'PNLIP'	protein_coding
10	118336653	118342829	+	ENSG00000232091	FANTOM5	'PNLIPP1'	noncoding_pseudogene
10	118340776	118342386	-	CATG00000000976	FANTOM5	'CATG00000000976.1'	noncoding_short_ncRNA
10	118380465	118405488	+	ENSG00000165862	FANTOM5	'PNLIPRP2'	noncoding_pseudogene
10	118421731	118429793	-	ENSG00000165863	FANTOM5	'C10orf82'	protein_coding
10	118573075	118609747	-	ENSG00000225302	FANTOM5	'RP11-539I5.1'	noncoding_lncRNA_divergent
10	118764194	118776467	+	CATG00000116531	FANTOM5	'CATG00000116531.1'	protein_coding
10	118888032	118899064	-	ENSG00000148704	FANTOM5	'VAX1'	protein_coding
10	118904091	118978240	-	ENSG00000234474	FANTOM5	'RP11-501J20.2'	noncoding_lncRNA_intergenic
10	118957000	118969810	+	ENSG00000186795	Ensembl	'KCNK18'	protein_coding
10	118976360	118986956	+	CATG00000116537	FANTOM5	'CATG00000116537.1'	protein_coding
10	119026634	119135521	-	ENSG00000165650	FANTOM5	'PDZD8'	protein_coding
10	119095118	119096144	-	CATG00000001000	FANTOM5	'CATG00000001000.1'	noncoding_lncRNA_noncoding_sense_intronic
10	119184705	119256569	+	ENSG00000258114	FANTOM5	'CTA-109P11.4'	noncoding_lncRNA_intergenic
10	119208576	119217805	-	CATG00000001005	FANTOM5	'CATG00000001005.1'	noncoding_lncRNA_intergenic
10	119301006	119353293	+	ENSG00000170370	FANTOM5	'EMX2'	protein_coding
10	119321595	119331968	-	ENSG00000235198	Ensembl	'CTA-109P11.1'	noncoding_lncRNA_lincRNA
10	119436521	119444154	-	CATG00000001009	FANTOM5	'CATG00000001009.1'	noncoding_lncRNA_intergenic
10	119494495	119513069	+	ENSG00000234952	FANTOM5	'RP11-328K15.1'	noncoding_lncRNA_intergenic
10	119584834	119590752	-	ENSG00000263041	FANTOM5	'RP11-355F22.1'	noncoding_lncRNA_intergenic
10	120001034	120027222	+	ENSG00000238276	FANTOM5	'RP11-245J24.1'	noncoding_lncRNA_intergenic
10	120116371	120158380	+	ENSG00000232139	FANTOM5	'LINC00867'	noncoding_lncRNA_intergenic
10	120261560	120323310	+	CATG00000116585	FANTOM5	'CATG00000116585.1'	noncoding_lncRNA_intergenic
10	120515869	120530388	-	CATG00000001023	FANTOM5	'CATG00000001023.1'	noncoding_lncRNA_intergenic
10	120790030	120840329	-	ENSG00000107581	FANTOM5	'EIF3A'	protein_coding
10	120863625	120900909	+	ENSG00000119979	FANTOM5	'FAM45A'	protein_coding
10	120892688	120925601	-	ENSG00000183605	FANTOM5	'SFXN4'	protein_coding
10	120925311	120938324	-	ENSG00000165672	FANTOM5	'PRDX3'	protein_coding
10	120958309	120966959	-	CATG00000001034	FANTOM5	'CATG00000001034.1'	noncoding_lncRNA_divergent
10	121094006	121095639	-	ENSG00000236426	FANTOM5	'RP11-79M19.2'	noncoding_lncRNA_noncoding_antisense
10	121326961	121356542	-	ENSG00000151923	FANTOM5	'TIAL1'	protein_coding
10	121355430	121361464	+	CATG00000116621	FANTOM5	'CATG00000116621.1'	noncoding_lncRNA_divergent
10	121410894	121438167	+	ENSG00000151929	FANTOM5	'BAG3'	protein_coding
10	121429362	121485882	-	CATG00000001043	FANTOM5	'CATG00000001043.1'	noncoding_lncRNA_divergent
10	121463835	121471151	+	CATG00000116629	FANTOM5	'CATG00000116629.1'	noncoding_lncRNA_intergenic
10	121643410	121704943	+	ENSG00000107651	FANTOM5	'SEC23IP'	protein_coding
10	122610904	122669039	+	ENSG00000120008	FANTOM5	'WDR11'	protein_coding
10	122685059	122740214	-	ENSG00000227307	FANTOM5	'RP11-95I16.2'	noncoding_lncRNA_intergenic
10	122725987	122752135	+	CATG00000116688	FANTOM5	'CATG00000116688.1'	noncoding_lncRNA_intergenic
10	122907106	122916290	+	CATG00000116699	FANTOM5	'CATG00000116699.1'	noncoding_lncRNA_intergenic
10	123686291	123717352	+	ENSG00000226864	FANTOM5	'RP11-500G22.2'	noncoding_lncRNA_divergent
10	123899827	123914680	-	CATG00000001087	FANTOM5	'CATG00000001087.1'	noncoding_lncRNA_noncoding_antisense
10	124030813	124099735	+	ENSG00000138152	FANTOM5	'BTBD16'	protein_coding
10	124133346	124203193	+	ENSG00000107679	FANTOM5	'PLEKHA1'	protein_coding
10	124233369	124254470	-	CATG00000001095	FANTOM5	'CATG00000001095.1'	protein_coding
10	124432366	124439010	+	CATG00000116722	FANTOM5	'CATG00000116722.1'	protein_coding
10	124578395	124586370	+	ENSG00000272135	FANTOM5	'RP11-107C16.2'	noncoding_pseudogene
10	124591481	124639068	-	ENSG00000138161	FANTOM5	'CUZD1'	protein_coding
10	124608594	124639068	-	ENSG00000213185	FANTOM5	'FAM24B'	protein_coding
10	124612017	124620523	+	CATG00000116725	FANTOM5	'CATG00000116725.1'	noncoding_lncRNA_divergent
10	124679869	124713731	-	ENSG00000119965	FANTOM5	'C10orf88'	protein_coding
10	124713974	124762597	+	ENSG00000179988	FANTOM5	'PSTK'	protein_coding
10	124744910	124768311	-	ENSG00000095574	FANTOM5	'IKZF5'	protein_coding
10	124894886	124903640	+	ENSG00000188620	FANTOM5	'HMX3'	protein_coding
10	124913918	124988481	+	ENSG00000154473	FANTOM5	'BUB3'	protein_coding
10	125014537	125034247	-	CATG00000001102	FANTOM5	'CATG00000001102.1'	noncoding_lncRNA_intergenic
10	125237534	125242371	-	CATG00000001103	FANTOM5	'CATG00000001103.1'	protein_coding
10	125333743	125343283	+	ENSG00000234542	Ensembl	'RP11-282I1.2'	noncoding_lncRNA_lincRNA
10	125673090	125691113	-	ENSG00000234677	Ensembl	'RP11-285A18.2'	noncoding_sense_intronic
10	125751266	125770082	+	ENSG00000213438	FANTOM5	'RP11-47G11.3'	noncoding_pseudogene
10	126067947	126077832	-	CATG00000001134	FANTOM5	'CATG00000001134.1'	noncoding_lncRNA_intergenic
10	126168725	126179186	-	ENSG00000229455	FANTOM5	'RPS10P18'	noncoding_pseudogene
10	126392728	126431074	+	ENSG00000233334	FANTOM5	'RP11-464O2.2'	noncoding_lncRNA_noncoding_antisense
10	126442950	126480794	-	ENSG00000203791	FANTOM5	'METTL10'	protein_coding
10	126490388	126525486	+	ENSG00000165660	FANTOM5	'FAM175B'	protein_coding
10	126565359	126605273	-	CATG00000001138	FANTOM5	'CATG00000001138.1'	noncoding_lncRNA_intergenic
10	126630588	126677906	+	ENSG00000019995	FANTOM5	'ZRANB1'	protein_coding
10	126920344	126975238	+	CATG00000116783	FANTOM5	'CATG00000116783.1'	noncoding_lncRNA_intergenic
10	127350866	127398627	+	ENSG00000228021	FANTOM5	'RP11-383C5.3'	noncoding_lncRNA_intergenic
10	127408279	127458749	+	ENSG00000107938	FANTOM5	'C10orf137'	protein_coding
10	127433365	127440658	-	ENSG00000236991	FANTOM5	'RP11-383C5.7'	noncoding_lncRNA_divergent
10	127442220	127462675	-	CATG00000001146	FANTOM5	'CATG00000001146.1'	protein_coding
10	127469828	127511851	-	ENSG00000188690	FANTOM5	'UROS'	protein_coding
10	127477199	127487106	+	CATG00000116795	FANTOM5	'CATG00000116795.1'	noncoding_lncRNA_noncoding_antisense
10	127892349	127893877	+	CATG00000116808	FANTOM5	'CATG00000116808.1'	noncoding_lncRNA_noncoding_antisense
10	128075684	128165468	+	CATG00000116813	FANTOM5	'CATG00000116813.1'	noncoding_lncRNA_noncoding_antisense
10	128087271	128111332	-	ENSG00000235180	FANTOM5	'LINC00601'	noncoding_lncRNA_intergenic
10	128596711	128608400	+	CATG00000116820	FANTOM5	'CATG00000116820.1'	noncoding_lncRNA_noncoding_sense_intronic
10	128798541	128824771	-	ENSG00000223528	FANTOM5	'RP11-223P11.3'	noncoding_lncRNA_noncoding_antisense
10	73851889	73976892	-	ENSG00000138303	FANTOM5	'ASCC1'	protein_coding
10	74051267	74057826	-	CATG00000000107	FANTOM5	'CATG00000000107.1'	protein_coding
10	74122887	74385883	-	ENSG00000107745	FANTOM5	'MICU1'	protein_coding
10	74451901	74648928	+	ENSG00000156026	FANTOM5	'MCU'	protein_coding
10	74579507	74581064	+	CATG00000115611	FANTOM5	'CATG00000115611.1'	noncoding_lncRNA_noncoding_sense_intronic
10	74690695	74714542	-	ENSG00000138308	FANTOM5	'PLA2G12B'	protein_coding
10	74739389	74927829	-	ENSG00000122884	FANTOM5	'P4HA1'	protein_coding
10	74789962	74927829	-	ENSG00000122882	FANTOM5	'ECD'	protein_coding
10	74927877	75004262	+	ENSG00000138286	FANTOM5	'FAM149B1'	protein_coding
10	74943120	75007013	-	ENSG00000213551	FANTOM5	'DNAJC9'	protein_coding
10	75002582	75126965	-	ENSG00000156042	FANTOM5	'TTC18'	protein_coding
10	75195988	75255774	-	ENSG00000107758	FANTOM5	'PPP3CB'	protein_coding
10	75255835	75385739	-	ENSG00000166348	FANTOM5	'USP54'	protein_coding
10	75561509	75634340	-	ENSG00000148660	FANTOM5	'CAMK2G'	protein_coding
10	75667917	75918033	+	ENSG00000122861	FANTOM5	'PLAU'	protein_coding
10	75757652	75883915	+	ENSG00000035403	FANTOM5	'VCL'	protein_coding
10	75866233	75910796	-	ENSG00000185009	FANTOM5	'AP3M1'	protein_coding
10	75910979	76469932	+	ENSG00000156110	FANTOM5	'ADK'	protein_coding
10	76265890	76289096	-	ENSG00000232342	FANTOM5	'RP11-46O21.2'	noncoding_lncRNA_noncoding_antisense
10	76414877	76415889	+	ENSG00000214626	FANTOM5	'POLR3DP1'	noncoding_pseudogene
10	76584694	76798270	+	ENSG00000156650	FANTOM5	'KAT6B'	protein_coding
10	76792382	76833398	-	ENSG00000188716	FANTOM5	'DUPD1'	protein_coding
10	76803577	76810558	+	CATG00000115658	FANTOM5	'CATG00000115658.1'	noncoding_lncRNA_noncoding_antisense
10	76859344	76944522	+	ENSG00000156671	FANTOM5	'SAMD8'	protein_coding
10	77022479	77121872	+	ENSG00000226051	FANTOM5	'ZNF503-AS1'	noncoding_lncRNA_intergenic
10	77039286	77162109	-	ENSG00000270087	FANTOM5	'RP11-399K21.11'	noncoding_lncRNA_intergenic
10	77331941	77352388	-	CATG00000000173	FANTOM5	'CATG00000000173.1'	protein_coding
10	78509229	78517912	-	CATG00000000179	FANTOM5	'CATG00000000179.1'	noncoding_lncRNA_intergenic
10	79938960	80156657	+	ENSG00000227136	FANTOM5	'LINC00595'	noncoding_lncRNA_noncoding_sense_intronic
10	80008405	80313522	+	ENSG00000230417	FANTOM5	'LINC00856'	noncoding_lncRNA_intergenic
10	80191575	80270532	-	CATG00000000218	FANTOM5	'CATG00000000218.1'	noncoding_lncRNA_intergenic
10	80828686	81077331	+	ENSG00000108175	FANTOM5	'ZMIZ1'	protein_coding
10	81263829	81266037	-	ENSG00000241317	Ensembl	'RP11-342M3.1'	noncoding_lncRNA_lincRNA
10	81422496	81586305	-	ENSG00000225484	FANTOM5	'RP11-773D16.1'	noncoding_lncRNA_intergenic
10	81892288	81965564	-	ENSG00000122359	FANTOM5	'ANXA11'	protein_coding
10	82006325	82118818	-	ENSG00000234743	FANTOM5	'EIF5AP4'	noncoding_pseudogene
10	82167505	82196989	+	ENSG00000122378	FANTOM5	'FAM213A'	protein_coding
10	82295873	82407223	+	ENSG00000178217	FANTOM5	'SH2D4B'	protein_coding
10	83204163	83340860	+	CATG00000115777	FANTOM5	'CATG00000115777.1'	noncoding_lncRNA_intergenic
10	84791940	84822622	-	CATG00000000264	FANTOM5	'CATG00000000264.1'	noncoding_lncRNA_intergenic
10	84983069	85191009	+	CATG00000115811	FANTOM5	'CATG00000115811.1'	noncoding_lncRNA_intergenic
10	85196790	85196885	-	ENSG00000265268	Ensembl	'AL356140.1'	noncoding_miRNA
10	86088345	86335575	+	ENSG00000107771	FANTOM5	'CCSER2'	protein_coding
10	88193758	88296320	-	ENSG00000062650	FANTOM5	'WAPAL'	protein_coding
10	88426549	88503271	+	ENSG00000122367	FANTOM5	'LDB3'	protein_coding
10	88509873	88716122	+	ENSG00000107779	FANTOM5	'BMPR1A'	protein_coding
10	88715516	88775361	+	ENSG00000271880	FANTOM5	'RP11-96C23.5'	noncoding_lncRNA_divergent
10	88717851	88755960	+	ENSG00000148671	FANTOM5	'ADIRF'	protein_coding
10	88853923	88970638	+	ENSG00000122376	FANTOM5	'FAM35A'	protein_coding
10	88963526	89102347	-	ENSG00000223482	FANTOM5	'NUTM2A-AS1'	noncoding_lncRNA_intergenic
10	89254856	89265225	-	CATG00000000327	FANTOM5	'CATG00000000327.1'	noncoding_lncRNA_divergent
10	89367742	89419036	+	ENSG00000225913	Ensembl	'RP11-57C13.6'	noncoding_lncRNA_lincRNA
10	89369920	89419756	-	ENSG00000196566	FANTOM5	'RP11-57C13.3'	noncoding_lncRNA_divergent
10	89508173	89601100	-	ENSG00000138138	FANTOM5	'ATAD1'	protein_coding
10	89621570	89746858	+	ENSG00000171862	FANTOM5	'PTEN'	protein_coding
10	89775779	90141036	+	CATG00000115895	FANTOM5	'CATG00000115895.1'	noncoding_lncRNA_intergenic
10	90562524	90588367	+	ENSG00000173239	FANTOM5	'LIPM'	protein_coding
10	90639125	90789362	+	ENSG00000138134	FANTOM5	'STAMBPL1'	protein_coding
10	90687963	90751088	-	ENSG00000107796	FANTOM5	'ACTA2'	protein_coding
10	90973295	91175124	-	ENSG00000107798	FANTOM5	'LIPA'	protein_coding
10	91087756	91100728	+	ENSG00000119917	FANTOM5	'IFIT3'	protein_coding
10	91333752	91405253	-	ENSG00000152782	FANTOM5	'PANK1'	protein_coding
10	91461367	91801791	+	ENSG00000138182	FANTOM5	'KIF20B'	protein_coding
10	91647804	91933116	+	CATG00000115951	FANTOM5	'CATG00000115951.1'	noncoding_lncRNA_intergenic
10	92491304	92617757	-	ENSG00000148680	FANTOM5	'HTR7'	protein_coding
10	92630799	92724587	+	ENSG00000148688	FANTOM5	'RPP30'	protein_coding
10	92717841	92872899	-	CATG00000000417	FANTOM5	'CATG00000000417.1'	noncoding_lncRNA_intergenic
10	92792878	92821945	+	CATG00000115982	FANTOM5	'CATG00000115982.1'	noncoding_lncRNA_intergenic
10	92922603	93051868	+	ENSG00000180628	FANTOM5	'PCGF5'	protein_coding
10	93169044	93280878	+	ENSG00000165338	FANTOM5	'HECTD2'	protein_coding
10	93435660	93567291	-	ENSG00000180581	FANTOM5	'SRP9P1'	noncoding_pseudogene
10	93556254	93628275	+	ENSG00000107854	FANTOM5	'TNKS2'	protein_coding
10	93683552	93795150	+	ENSG00000095564	FANTOM5	'BTAF1'	protein_coding
10	93802936	94050835	-	ENSG00000107864	FANTOM5	'CPEB3'	protein_coding
10	94050924	94119063	+	ENSG00000198060	FANTOM5	'MARCH5'	protein_coding
10	94102663	94317897	+	CATG00000116023	FANTOM5	'CATG00000116023.1'	noncoding_lncRNA_intergenic
10	94104253	94269247	+	CATG00000116024	FANTOM5	'CATG00000116024.1'	noncoding_lncRNA_noncoding_sense_intronic
10	94191138	94333826	-	ENSG00000119912	FANTOM5	'IDE'	protein_coding
10	94459625	94819914	+	ENSG00000138190	FANTOM5	'EXOC6'	protein_coding
10	95066038	95242340	-	ENSG00000138119	FANTOM5	'MYOF'	protein_coding
10	95256396	95303399	+	ENSG00000138180	FANTOM5	'CEP55'	protein_coding
10	95517693	95560342	+	ENSG00000108231	FANTOM5	'LGI1'	protein_coding
10	95653754	95715819	+	ENSG00000176273	FANTOM5	'SLC35G1'	protein_coding
10	95753699	96094594	+	ENSG00000138193	FANTOM5	'PLCE1'	protein_coding
10	96072215	96122696	-	ENSG00000173145	FANTOM5	'NOC3L'	protein_coding
10	96162021	96301141	+	ENSG00000108239	FANTOM5	'TBC1D12'	protein_coding
10	96303830	96390942	+	ENSG00000119969	FANTOM5	'HELLS'	protein_coding
10	96337196	96370995	+	ENSG00000244332	Ensembl	'RP11-119K6.6'	noncoding_sense_overlapping
10	96698415	96749848	+	ENSG00000138109	FANTOM5	'CYP2C9'	protein_coding
10	96757739	96896077	+	CATG00000116079	FANTOM5	'CATG00000116079.1'	noncoding_lncRNA_intergenic
10	97067563	97321128	-	ENSG00000095637	FANTOM5	'SORBS1'	protein_coding
10	97362914	97416591	-	ENSG00000059573	FANTOM5	'ALDH18A1'	protein_coding
10	97620305	97684601	+	ENSG00000270099	Ensembl	'RP11-248J23.7'	protein_coding
10	97667732	97793522	+	ENSG00000188649	FANTOM5	'CC2D2B'	protein_coding
10	97733786	97792432	+	ENSG00000269920	Ensembl	'RP11-690P14.4'	protein_coding
10	97889479	97965044	+	ENSG00000177853	FANTOM5	'ZNF518A'	noncoding_lncRNA_intergenic
10	98032481	98098442	+	ENSG00000107447	FANTOM5	'DNTT'	protein_coding
10	98124248	98273675	-	ENSG00000095587	FANTOM5	'TLL2'	protein_coding
10	98275394	98347201	-	ENSG00000077147	FANTOM5	'TM9SF3'	protein_coding
10	98351794	98480271	-	ENSG00000155629	FANTOM5	'PIK3AP1'	protein_coding
10	98591639	98762233	+	ENSG00000196233	FANTOM5	'LCOR'	protein_coding
10	98651323	99051012	+	CATG00000116115	FANTOM5	'CATG00000116115.1'	noncoding_lncRNA_noncoding_antisense
10	98757596	98945834	-	ENSG00000187122	FANTOM5	'SLIT1'	protein_coding
10	98757795	99052394	-	ENSG00000269891	FANTOM5	'ARHGAP19-SLIT1'	protein_coding
10	98955647	98963472	+	CATG00000116120	FANTOM5	'CATG00000116120.1'	noncoding_lncRNA_noncoding_sense_intronic
10	99084713	99094737	-	ENSG00000181274	FANTOM5	'FRAT2'	protein_coding
10	99205934	99230757	+	ENSG00000171307	FANTOM5	'ZDHHC16'	protein_coding
10	99214381	99259257	-	ENSG00000155229	FANTOM5	'MMS19'	protein_coding
10	99258307	99382505	+	ENSG00000165886	FANTOM5	'UBTD1'	protein_coding
10	99331520	99377973	+	ENSG00000241935	FANTOM5	'HOGA1'	protein_coding
10	99344146	99433667	+	ENSG00000249967	FANTOM5	'PI4K2A'	protein_coding
10	99344146	99485847	+	ENSG00000155252	FANTOM5	'PI4K2A'	protein_coding
10	99894415	100040231	+	ENSG00000166024	FANTOM5	'R3HCC1L'	protein_coding
10	100006830	100028518	-	ENSG00000138131	FANTOM5	'LOXL4'	protein_coding
10	101149373	101191330	-	ENSG00000120053	FANTOM5	'GOT1'	protein_coding
10	101419266	101613709	+	ENSG00000023839	FANTOM5	'ABCC2'	protein_coding
10	101419266	101511457	+	ENSG00000198018	FANTOM5	'ENTPD7'	protein_coding
10	101437749	101491852	-	ENSG00000014919	FANTOM5	'COX15'	protein_coding
10	101445230	101567282	+	ENSG00000119929	FANTOM5	'CUTC'	protein_coding
10	101800834	101869567	-	ENSG00000120054	FANTOM5	'CPN1'	protein_coding
10	101948055	101989353	-	ENSG00000213341	FANTOM5	'CHUK'	protein_coding
10	102093930	102106698	-	ENSG00000231188	FANTOM5	'RP11-34D15.2'	noncoding_lncRNA_divergent
10	102134482	102290074	-	ENSG00000166136	FANTOM5	'NDUFB8'	protein_coding
10	102222768	102246495	+	ENSG00000075290	FANTOM5	'WNT8B'	protein_coding
10	102223399	102296419	-	ENSG00000075826	FANTOM5	'SEC31B'	protein_coding
10	102488838	102499317	-	CATG00000000625	FANTOM5	'CATG00000000625.1'	noncoding_lncRNA_intergenic
10	102495153	102627206	+	ENSG00000075891	FANTOM5	'PAX2'	protein_coding
10	102849078	102901104	-	ENSG00000236311	FANTOM5	'TLX1NB'	protein_coding
10	102891057	102926741	+	ENSG00000107807	FANTOM5	'TLX1'	protein_coding
10	103007778	103023338	-	ENSG00000229649	FANTOM5	'RP11-107I14.4'	noncoding_lncRNA_intergenic
10	103113760	103321876	+	ENSG00000166167	FANTOM5	'BTRC'	protein_coding
10	103361282	103455103	-	ENSG00000107829	FANTOM5	'FBXW4'	protein_coding
10	103544064	103582738	-	ENSG00000198408	FANTOM5	'MGEA5'	protein_coding
10	103990400	104142757	+	ENSG00000107862	FANTOM5	'GBF1'	protein_coding
10	104195528	104206485	+	ENSG00000202569	FANTOM5	'MIR146B'	noncoding_small_RNA
10	104262079	104394399	+	ENSG00000107882	FANTOM5	'SUFU'	protein_coding
10	104425229	104474149	-	ENSG00000138175	FANTOM5	'ARL3'	protein_coding
10	104570939	104614270	-	ENSG00000148795	FANTOM5	'CYP17A1'	protein_coding
10	104678051	104850077	+	ENSG00000148842	FANTOM5	'CNNM2'	protein_coding
10	105239360	105277182	-	ENSG00000235470	FANTOM5	'RP11-225H22.5'	noncoding_lncRNA_divergent
10	105344914	105615540	-	ENSG00000107957	FANTOM5	'SH3PXD2A'	protein_coding
10	105505762	105521202	+	CATG00000116309	FANTOM5	'CATG00000116309.1'	protein_coding
10	105623387	105677942	-	ENSG00000107960	FANTOM5	'OBFC1'	protein_coding
10	105726927	105793646	+	ENSG00000065613	FANTOM5	'SLK'	protein_coding
10	106028616	106067005	+	ENSG00000065621	FANTOM5	'GSTO2'	protein_coding
10	106098278	106218240	+	ENSG00000120051	FANTOM5	'CCDC147'	protein_coding
10	107248935	107729912	-	CATG00000000711	FANTOM5	'CATG00000000711.1'	noncoding_lncRNA_intergenic
10	108331282	108925008	-	ENSG00000108018	FANTOM5	'SORCS1'	protein_coding
10	110354400	110447281	+	CATG00000116370	FANTOM5	'CATG00000116370.1'	noncoding_lncRNA_intergenic
10	110470276	110599121	+	ENSG00000223381	Ensembl	'RP11-655H13.2'	noncoding_lncRNA_lincRNA
10	110681733	110963886	-	CATG00000000816	FANTOM5	'CATG00000000816.1'	noncoding_lncRNA_intergenic
10	110731180	110778745	+	CATG00000116371	FANTOM5	'CATG00000116371.1'	noncoding_lncRNA_intergenic
10	111619350	111683266	-	ENSG00000108039	FANTOM5	'XPNPEP1'	protein_coding
10	111725370	111898770	+	ENSG00000148700	FANTOM5	'ADD3'	protein_coding
10	112256161	112334589	+	ENSG00000138166	FANTOM5	'DUSP5'	protein_coding
10	112327453	112366165	+	ENSG00000108055	FANTOM5	'SMC3'	protein_coding
10	112403003	112625732	+	ENSG00000203867	FANTOM5	'RBM20'	protein_coding
10	112678532	112782585	+	ENSG00000108061	FANTOM5	'SHOC2'	protein_coding
10	113892547	113902423	+	CATG00000116428	FANTOM5	'CATG00000116428.1'	noncoding_lncRNA_intergenic
10	113989046	114095066	-	ENSG00000243316	FANTOM5	'GUCY2GP'	noncoding_pseudogene
10	114021480	114064808	+	ENSG00000119913	FANTOM5	'TECTB'	protein_coding
10	114132158	114191259	+	ENSG00000197142	FANTOM5	'ACSL5'	protein_coding
10	114665835	114709022	-	CATG00000000918	FANTOM5	'CATG00000000918.1'	protein_coding
10	114710006	114930695	+	ENSG00000148737	FANTOM5	'TCF7L2'	protein_coding
10	114937167	115237980	+	ENSG00000238380	FANTOM5	'RNU7-165P'	noncoding_small_RNA
10	115188866	115223610	-	CATG00000000935	FANTOM5	'CATG00000000935.1'	noncoding_lncRNA_intergenic
10	115438953	115490983	+	ENSG00000165806	FANTOM5	'CASP7'	protein_coding
10	115470440	115479248	-	ENSG00000234393	FANTOM5	'RP11-211N11.5'	noncoding_lncRNA_divergent
10	115591819	115616022	-	ENSG00000198924	FANTOM5	'DCLRE1A'	protein_coding
10	115604204	115613017	+	CATG00000116482	FANTOM5	'CATG00000116482.1'	noncoding_lncRNA_noncoding_antisense
10	116050977	116164934	-	ENSG00000169129	FANTOM5	'AFAP1L2'	protein_coding
10	116581549	116852394	+	ENSG00000151553	FANTOM5	'FAM160B1'	protein_coding
10	117815912	118034217	-	ENSG00000151892	FANTOM5	'GFRA1'	protein_coding
10	118083929	118139685	+	ENSG00000182645	FANTOM5	'CCDC172'	protein_coding
10	118178184	118250668	+	ENSG00000203837	FANTOM5	'PNLIPRP3'	protein_coding
10	118349922	118369240	+	ENSG00000187021	FANTOM5	'PNLIPRP1'	protein_coding
10	118609023	118662003	+	ENSG00000188316	FANTOM5	'ENO4'	protein_coding
10	118638270	118885971	-	ENSG00000187164	FANTOM5	'KIAA1598'	protein_coding
10	119000630	119045547	+	ENSG00000165646	FANTOM5	'SLC18A2'	protein_coding
10	119136489	119157815	-	CATG00000001004	FANTOM5	'CATG00000001004.1'	noncoding_lncRNA_intergenic
10	119230312	119304569	-	ENSG00000229847	FANTOM5	'EMX2OS'	noncoding_lncRNA_divergent
10	119406352	119407006	+	CATG00000116554	FANTOM5	'CATG00000116554.1'	noncoding_lncRNA_intergenic
10	119747243	119806444	-	ENSG00000107560	FANTOM5	'RAB11FIP2'	protein_coding
10	119776998	119805321	+	ENSG00000231104	Ensembl	'RP11-354M20.3'	noncoding_antisense
10	119805790	119975608	+	ENSG00000177640	FANTOM5	'CASC2'	noncoding_lncRNA_divergent
10	120053398	120101832	-	ENSG00000165669	FANTOM5	'FAM204A'	protein_coding
10	120058507	120062560	+	CATG00000116574	FANTOM5	'CATG00000116574.1'	noncoding_lncRNA_intergenic
10	120216546	120355156	-	ENSG00000119973	FANTOM5	'PRLHR'	protein_coding
10	120435654	120514482	-	ENSG00000151893	FANTOM5	'CACUL1'	protein_coding
10	120938448	121219240	+	ENSG00000198873	FANTOM5	'GRK5'	protein_coding
10	121103643	121111307	+	CATG00000116615	FANTOM5	'CATG00000116615.1'	noncoding_lncRNA_noncoding_sense_intronic
10	121121363	121303063	-	ENSG00000148908	FANTOM5	'RGS10'	protein_coding
10	121485461	121596774	+	ENSG00000198825	FANTOM5	'INPP5F'	protein_coding
10	121932106	122097660	+	CATG00000116639	FANTOM5	'CATG00000116639.1'	noncoding_lncRNA_intergenic
10	122215911	122395736	+	ENSG00000203805	FANTOM5	'PPAPDC1A'	protein_coding
10	122517001	122610721	-	ENSG00000227165	FANTOM5	'WDR11-AS1'	noncoding_lncRNA_divergent
10	122798471	123219306	-	CATG00000001057	FANTOM5	'CATG00000001057.1'	noncoding_lncRNA_intergenic
10	123237482	123357945	-	ENSG00000066468	FANTOM5	'FGFR2'	protein_coding
10	123499890	123687978	-	ENSG00000107669	FANTOM5	'ATE1'	protein_coding
10	123748678	124014110	+	ENSG00000138162	FANTOM5	'TACC2'	protein_coding
10	124221042	124281557	+	ENSG00000166033	FANTOM5	'HTRA1'	protein_coding
10	124318316	124403488	+	ENSG00000187908	FANTOM5	'DMBT1'	protein_coding
10	124516197	124557161	+	ENSG00000176584	FANTOM5	'RP11-318C4.2'	noncoding_pseudogene
10	124638535	124658688	+	ENSG00000255624	FANTOM5	'RP11-564D11.3'	noncoding_pseudogene
10	124901917	124912091	+	ENSG00000188816	FANTOM5	'HMX2'	protein_coding
10	125013460	125322172	+	ENSG00000230131	FANTOM5	'RP11-282I1.1'	noncoding_lncRNA_intergenic
10	125425459	125460511	+	ENSG00000154478	FANTOM5	'GPR26'	protein_coding
10	125465723	125703614	-	ENSG00000121898	FANTOM5	'CPXM2'	protein_coding
10	125946107	126042786	-	CATG00000001121	FANTOM5	'CATG00000001121.1'	noncoding_lncRNA_intergenic
10	126081525	126107771	-	ENSG00000065154	FANTOM5	'OAT'	protein_coding
10	126150392	126315663	+	ENSG00000107902	FANTOM5	'LHPP'	protein_coding
10	126235711	126432907	-	ENSG00000189319	FANTOM5	'FAM53B'	protein_coding
10	126302935	126480439	-	ENSG00000258539	FANTOM5	'RP11-12J10.3'	protein_coding
10	126605489	126631450	+	ENSG00000249456	FANTOM5	'RP11-298J20.4'	noncoding_lncRNA_intergenic
10	126672400	126851357	-	ENSG00000175029	FANTOM5	'CTBP2'	protein_coding
10	127264435	127371703	-	ENSG00000175018	FANTOM5	'TEX36'	protein_coding
10	127389005	127408154	-	ENSG00000224023	FANTOM5	'RP11-383C5.4'	noncoding_lncRNA_divergent
10	127511520	127543617	+	ENSG00000107949	FANTOM5	'BCCIP'	protein_coding
10	127522015	127585021	-	ENSG00000089876	FANTOM5	'DHX32'	protein_coding
10	127584579	127705218	+	ENSG00000203780	FANTOM5	'FANK1'	protein_coding
10	128110069	128359644	-	ENSG00000154493	FANTOM5	'C10orf90'	protein_coding
10	128444525	128476207	+	CATG00000116818	FANTOM5	'CATG00000116818.1'	noncoding_lncRNA_intergenic
10	77190110	78326715	+	ENSG00000148655	FANTOM5	'C10orf11'	protein_coding
10	78629168	79542526	-	ENSG00000156113	FANTOM5	'KCNMA1'	protein_coding
10	79520246	79700494	-	ENSG00000151208	FANTOM5	'DLG5'	protein_coding
10	79685427	79691830	+	ENSG00000233871	FANTOM5	'DLG5-AS1'	noncoding_lncRNA_intergenic
10	80686218	80829286	-	ENSG00000224596	FANTOM5	'ZMIZ1-AS1'	noncoding_lncRNA_intergenic
10	81784607	81800831	-	ENSG00000227515	FANTOM5	'C1DP4'	noncoding_pseudogene
10	85980254	85985299	-	ENSG00000204033	FANTOM5	'LRIT2'	protein_coding
10	87355803	88126551	-	ENSG00000182771	FANTOM5	'GRID1'	protein_coding
10	89117425	89130452	+	ENSG00000214562	Ensembl	'NUTM2D'	protein_coding
10	90022777	90343075	-	ENSG00000184719	FANTOM5	'RNLS'	protein_coding
10	91173611	91316461	-	ENSG00000152779	FANTOM5	'SLC16A12'	protein_coding
10	91215746	91227897	+	ENSG00000234452	FANTOM5	'RP11-168O10.6'	noncoding_lncRNA_noncoding_antisense
10	93066722	93373486	-	CATG00000000425	FANTOM5	'CATG00000000425.1'	noncoding_lncRNA_intergenic
10	94333668	94428384	+	ENSG00000138160	FANTOM5	'KIF11'	protein_coding
10	95372294	95425767	+	ENSG00000095464	FANTOM5	'PDE6C'	protein_coding
10	95419920	95462921	-	ENSG00000148690	FANTOM5	'FRA10AC1'	protein_coding
10	96357778	96495947	+	ENSG00000108242	FANTOM5	'CYP2C18'	protein_coding
10	96442661	96741120	+	ENSG00000165841	FANTOM5	'CYP2C19'	protein_coding
10	97453938	97637023	+	ENSG00000138185	FANTOM5	'ENTPD1'	protein_coding
10	97512963	97849972	-	ENSG00000226688	FANTOM5	'ENTPD1-AS1'	noncoding_lncRNA_divergent
10	99581654	99634237	+	ENSG00000155265	FANTOM5	'GOLGA7B'	protein_coding
10	99614671	99790378	-	ENSG00000095713	FANTOM5	'CRTAC1'	protein_coding
10	101634907	101770246	-	ENSG00000107554	FANTOM5	'DNMBP'	protein_coding
10	101686965	101718991	+	ENSG00000227695	FANTOM5	'DNMBP-AS1'	noncoding_lncRNA_noncoding_antisense
10	102753467	102790886	-	ENSG00000186862	FANTOM5	'PDZD7'	protein_coding
10	102756315	102768592	+	ENSG00000107816	FANTOM5	'LZTS2'	protein_coding
10	103603867	103815930	-	ENSG00000120029	FANTOM5	'C10orf76'	protein_coding
10	104823814	104949102	-	CATG00000000679	FANTOM5	'CATG00000000679.1'	noncoding_lncRNA_noncoding_sense_intronic
10	104836598	105037367	-	ENSG00000076685	FANTOM5	'NT5C2'	protein_coding
10	105879910	105929986	+	ENSG00000156384	FANTOM5	'SFR1'	protein_coding
10	105886272	105992099	-	ENSG00000197748	FANTOM5	'WDR96'	protein_coding
10	106400390	107025042	+	ENSG00000156395	FANTOM5	'SORCS3'	protein_coding
10	107854572	108096817	-	CATG00000000730	FANTOM5	'CATG00000000730.1'	noncoding_lncRNA_intergenic
10	109953063	110321602	-	ENSG00000203434	FANTOM5	'RP11-163F15.1'	noncoding_lncRNA_intergenic
10	112176589	112269982	-	ENSG00000273143	FANTOM5	'RP11-525A16.4'	noncoding_lncRNA_divergent
10	112182804	112243072	+	CATG00000116401	FANTOM5	'CATG00000116401.1'	noncoding_lncRNA_intergenic
10	113175356	113987435	-	ENSG00000119927	FANTOM5	'GPAM'	protein_coding
10	114206757	114648528	+	ENSG00000151532	FANTOM5	'VTI1A'	protein_coding
10	115312813	115365565	+	ENSG00000148702	FANTOM5	'HABP2'	protein_coding
10	116188265	116582696	-	ENSG00000099204	FANTOM5	'ABLIM1'	protein_coding
10	118430599	118502106	-	ENSG00000165868	FANTOM5	'HSPA12A'	protein_coding
10	120544057	120789081	-	ENSG00000251836	FANTOM5	'U3'	noncoding_small_RNA
10	121582490	121652004	-	ENSG00000197771	FANTOM5	'MCMBP'	protein_coding
10	123710581	123737311	-	ENSG00000107672	FANTOM5	'NSMCE4A'	protein_coding
10	124767543	124819113	+	ENSG00000196177	FANTOM5	'ACADSB'	protein_coding
10	127700504	128087327	-	ENSG00000148848	FANTOM5	'ADAM12'	protein_coding
10	128593997	129250781	+	ENSG00000150760	FANTOM5	'DOCK1'	protein_coding
10	128933451	128995369	-	ENSG00000188916	FANTOM5	'FAM196A'	protein_coding
10	75428402	75504540	-	ENSG00000242288	FANTOM5	'RP11-464F9.1'	noncoding_lncRNA_divergent
10	75490342	75497686	+	ENSG00000250959	FANTOM5	'GLUD1P3'	noncoding_pseudogene
10	83633898	84749962	+	ENSG00000185737	FANTOM5	'NRG3'	protein_coding
10	83862052	83911036	+	ENSG00000221378	FANTOM5	'AL096864.1'	noncoding_small_RNA
10	91936988	92426205	-	ENSG00000236373	FANTOM5	'RP11-15K3.1'	noncoding_lncRNA_intergenic
10	100216739	100995451	-	ENSG00000172987	FANTOM5	'HPSE2'	protein_coding
10	108953989	109196509	-	CATG00000000748	FANTOM5	'CATG00000000748.1'	noncoding_lncRNA_intergenic
10	116852210	117710370	+	ENSG00000107518	FANTOM5	'ATRNL1'	protein_coding
10	125546165	125853114	-	ENSG00000182022	FANTOM5	'CHST15'	protein_coding
10	66522640	66522929	-	ENSG00000270648	Ensembl	'CYP2C61P'	noncoding_pseudogene
10	66585271	66586649	+	ENSG00000216740	FANTOM5	'ANXA2P3'	noncoding_pseudogene
10	66814218	66814761	+	ENSG00000270754	Ensembl	'NEK4P3'	noncoding_pseudogene
10	66929196	66929627	-	ENSG00000227173	Ensembl	'MYL6P3'	noncoding_pseudogene
10	66929272	66929632	+	CATG00000115413	FANTOM5	'CATG00000115413.1'	noncoding_lncRNA_intergenic
10	66989499	66990272	+	CATG00000115417	FANTOM5	'CATG00000115417.1'	noncoding_lncRNA_intergenic
10	67007790	67008550	-	ENSG00000233724	Ensembl	'RP11-252C24.2'	noncoding_pseudogene
10	67054933	67057559	+	CATG00000115422	FANTOM5	'CATG00000115422.1'	noncoding_lncRNA_intergenic
10	67073543	67074728	+	ENSG00000235356	Ensembl	'RP11-428G2.1'	noncoding_lncRNA_lincRNA
10	67378538	67379751	+	CATG00000115430	FANTOM5	'CATG00000115430.1'	noncoding_sense_overlap_RNA
10	67412471	67412869	+	CATG00000115433	FANTOM5	'CATG00000115433.1'	noncoding_lncRNA_noncoding_sense_intronic
10	67445751	67446921	+	CATG00000115436	FANTOM5	'CATG00000115436.1'	noncoding_sense_overlap_RNA
10	67469818	67469902	+	ENSG00000253012	Ensembl	'AC022538.1'	noncoding_miRNA
10	67511439	67512881	+	CATG00000115443	FANTOM5	'CATG00000115443.1'	noncoding_lncRNA_noncoding_sense_intronic
10	68254457	68254557	+	ENSG00000252203	Ensembl	'snoR442'	noncoding_snoRNA
10	68374995	68375096	-	ENSG00000239000	Ensembl	'snoU13'	noncoding_snoRNA
10	68652390	68654811	-	CATG00000118375	FANTOM5	'CATG00000118375.1'	noncoding_lncRNA_noncoding_sense_intronic
10	69093881	69094640	+	ENSG00000226448	Ensembl	'RP11-93L14.1'	noncoding_pseudogene
10	69209719	69210585	-	CATG00000118391	FANTOM5	'CATG00000118391.1'	noncoding_sense_overlap_RNA
10	69251703	69252967	-	CATG00000118395	FANTOM5	'CATG00000118395.1'	noncoding_lncRNA_noncoding_sense_intronic
10	69510042	69510983	+	ENSG00000213606	Ensembl	'AKR1B10P1'	noncoding_pseudogene
10	69523415	69524661	+	CATG00000115469	FANTOM5	'CATG00000115469.1'	noncoding_lncRNA_divergent
10	69547728	69548075	-	CATG00000118402	FANTOM5	'CATG00000118402.1'	noncoding_lncRNA_intergenic
10	69550298	69550799	-	CATG00000118403	FANTOM5	'CATG00000118403.1'	noncoding_lncRNA_intergenic
10	69553490	69554003	+	ENSG00000225922	FANTOM5	'RP11-57G10.1'	noncoding_pseudogene
10	69568260	69568366	+	ENSG00000212520	Ensembl	'RNU6-1250P'	noncoding_snRNA
10	69585068	69585358	-	ENSG00000239942	Ensembl	'RN7SL394P'	noncoding_misc_RNA
10	69593521	69593839	+	ENSG00000237141	Ensembl	'DNAJC19P1'	noncoding_pseudogene
10	69609283	69610504	+	ENSG00000272892	FANTOM5	'RP11-57G10.8'	noncoding_lncRNA_divergent
10	69634088	69634672	+	ENSG00000219932	FANTOM5	'RPL12P8'	noncoding_pseudogene
10	69720459	69721221	-	ENSG00000226318	Ensembl	'RP11-474D14.2'	noncoding_pseudogene
10	69723868	69724497	+	CATG00000115471	FANTOM5	'CATG00000115471.1'	noncoding_lncRNA_noncoding_antisense
10	69730030	69730126	-	ENSG00000221159	Ensembl	'AL356741.1'	noncoding_miRNA
10	69767477	69767774	-	ENSG00000266467	Ensembl	'RN7SL220P'	noncoding_misc_RNA
10	69769962	69770619	-	ENSG00000236375	Ensembl	'POU5F1P5'	noncoding_pseudogene
10	69835204	69838670	+	CATG00000115472	FANTOM5	'CATG00000115472.1'	noncoding_lncRNA_divergent
10	69846380	69846818	-	CATG00000118411	FANTOM5	'CATG00000118411.1'	noncoding_lncRNA_divergent
10	69917836	69918165	+	ENSG00000222371	Ensembl	'RN7SKP202'	noncoding_misc_RNA
10	69990142	69991868	-	ENSG00000179774	FANTOM5	'ATOH7'	protein_coding
10	69993008	70002136	-	ENSG00000233590	Ensembl	'RP11-153K11.3'	noncoding_lncRNA_lincRNA
10	70020314	70021256	+	ENSG00000234102	Ensembl	'KRT19P4'	noncoding_pseudogene
10	70038940	70039042	+	CATG00000115477	FANTOM5	'CATG00000115477.1'	noncoding_short_ncRNA
10	70091447	70106638	+	ENSG00000096746	FANTOM5	'HNRNPH3'	protein_coding
10	70184317	70184754	+	ENSG00000234806	Ensembl	'RP11-9E13.4'	noncoding_pseudogene
10	70221164	70221282	+	ENSG00000199638	Ensembl	'RNA5SP319'	noncoding_rRNA
10	70254239	70254372	-	CATG00000118424	FANTOM5	'CATG00000118424.1'	noncoding_short_ncRNA
10	70259247	70259725	+	ENSG00000226493	FANTOM5	'RP11-524O24.2'	noncoding_pseudogene
10	70260386	70262854	-	CATG00000118425	FANTOM5	'CATG00000118425.1'	noncoding_lncRNA_noncoding_sense_intronic
10	70262909	70263016	+	ENSG00000207438	Ensembl	'Y_RNA'	noncoding_misc_RNA
10	70287408	70289289	+	CATG00000115482	FANTOM5	'CATG00000115482.1'	noncoding_lncRNA_divergent
10	70303767	70304656	-	ENSG00000214881	FANTOM5	'TMEM14D'	noncoding_pseudogene
10	70392093	70400252	+	ENSG00000213025	FANTOM5	'COX20P1'	noncoding_pseudogene
10	70458257	70460551	+	ENSG00000260400	Ensembl	'RP11-119F7.5'	noncoding_sense_overlapping
10	70472715	70472835	+	ENSG00000251926	Ensembl	'snoU13'	noncoding_snoRNA
10	70477068	70477552	-	ENSG00000270494	Ensembl	'RP11-119F7.6'	noncoding_pseudogene
10	70495477	70495580	-	ENSG00000195401	Ensembl	'Y_RNA'	noncoding_misc_RNA
10	70502132	70502228	-	CATG00000118430	FANTOM5	'CATG00000118430.1'	noncoding_short_ncRNA
10	70507138	70507298	-	CATG00000118431	FANTOM5	'CATG00000118431.1'	noncoding_short_ncRNA
10	70514930	70514995	+	ENSG00000221182	FANTOM5	'SNORD98'	noncoding_small_RNA
10	70519075	70519171	+	ENSG00000221184	Ensembl	'MIR1254-1'	noncoding_miRNA
10	70604073	70606504	+	CATG00000115492	FANTOM5	'CATG00000115492.1'	noncoding_lncRNA_noncoding_sense_intronic
10	70606561	70606667	+	ENSG00000200218	Ensembl	'RNU6-697P'	noncoding_snRNA
10	70633794	70635723	+	CATG00000115496	FANTOM5	'CATG00000115496.1'	noncoding_lncRNA_noncoding_sense_intronic
10	70658886	70660807	-	CATG00000118434	FANTOM5	'CATG00000118434.1'	noncoding_lncRNA_divergent
10	70671409	70671515	-	ENSG00000206855	Ensembl	'RNU6-571P'	noncoding_snRNA
10	70683725	70691137	+	CATG00000115498	FANTOM5	'CATG00000115498.1'	noncoding_lncRNA_noncoding_sense_intronic
10	70708655	70709632	+	CATG00000115499	FANTOM5	'CATG00000115499.1'	noncoding_lncRNA_intergenic
10	70714871	70715846	-	CATG00000118438	FANTOM5	'CATG00000118438.1'	noncoding_lncRNA_divergent
10	70725145	70726075	+	ENSG00000266122	FANTOM5	'RN7SL373P'	noncoding_sense_overlap_RNA
10	70742846	70743453	-	CATG00000118440	FANTOM5	'CATG00000118440.1'	noncoding_lncRNA_noncoding_antisense
10	70750893	70751463	+	ENSG00000214875	Ensembl	'MED28P1'	noncoding_pseudogene
10	70783750	70783784	+	ENSG00000229001	FANTOM5	'ACTBP14'	noncoding_pseudogene
10	70784416	70784724	+	CATG00000115501	FANTOM5	'CATG00000115501.1'	noncoding_lncRNA_intergenic
10	70803379	70805328	-	CATG00000118442	FANTOM5	'CATG00000118442.1'	noncoding_lncRNA_intergenic
10	70804568	70809585	+	CATG00000115502	FANTOM5	'CATG00000115502.1'	noncoding_lncRNA_intergenic
10	70819379	70825392	-	CATG00000118445	FANTOM5	'CATG00000118445.1'	noncoding_lncRNA_intergenic
10	70825835	70826244	+	CATG00000115504	FANTOM5	'CATG00000115504.1'	noncoding_lncRNA_intergenic
10	70833755	70834515	+	CATG00000115506	FANTOM5	'CATG00000115506.1'	noncoding_lncRNA_intergenic
10	70840242	70840622	+	CATG00000115508	FANTOM5	'CATG00000115508.1'	noncoding_lncRNA_intergenic
10	70846575	70848808	-	CATG00000000008	FANTOM5	'CATG00000000008.1'	noncoding_lncRNA_divergent
10	70850054	70850986	+	CATG00000115509	FANTOM5	'CATG00000115509.1'	noncoding_lncRNA_noncoding_sense_intronic
10	70858998	70859562	+	CATG00000115511	FANTOM5	'CATG00000115511.1'	noncoding_lncRNA_noncoding_sense_intronic
10	70882667	70883647	-	CATG00000000010	FANTOM5	'CATG00000000010.1'	noncoding_lncRNA_divergent
10	70921286	70921737	-	ENSG00000233163	FANTOM5	'RP11-259F16.3'	noncoding_pseudogene
10	70935039	70940336	-	CATG00000000011	FANTOM5	'CATG00000000011.1'	noncoding_lncRNA_divergent
10	70965949	70968716	-	CATG00000000015	FANTOM5	'CATG00000000015.1'	noncoding_lncRNA_noncoding_antisense
10	71025098	71027904	-	ENSG00000231748	Ensembl	'RP11-227H15.5'	noncoding_antisense
10	71060188	71060603	-	ENSG00000229197	FANTOM5	'RP11-227H15.7'	noncoding_pseudogene
10	71123311	71123397	-	ENSG00000221774	Ensembl	'AC016821.1'	noncoding_miRNA
10	71192728	71193127	-	ENSG00000232734	Ensembl	'ATP5G1P7'	noncoding_pseudogene
10	71283067	71283406	-	ENSG00000233197	Ensembl	'TMEM256P1'	noncoding_pseudogene
10	71291604	71293798	+	CATG00000115525	FANTOM5	'CATG00000115525.1'	noncoding_lncRNA_intergenic
10	71331454	71333178	-	ENSG00000122859	FANTOM5	'NEUROG3'	protein_coding
10	71349636	71350261	-	ENSG00000230755	FANTOM5	'RP11-343J3.7'	noncoding_pseudogene
10	71350339	71350954	-	ENSG00000235803	FANTOM5	'RP11-343J3.6'	noncoding_pseudogene
10	71351162	71352314	-	ENSG00000235524	FANTOM5	'RP11-343J3.5'	noncoding_pseudogene
10	71353797	71354688	-	ENSG00000231152	Ensembl	'MTND2P15'	noncoding_pseudogene
10	71355243	71356192	-	ENSG00000226794	Ensembl	'MTND1P20'	noncoding_pseudogene
10	71538718	71539594	+	ENSG00000230469	Ensembl	'RPL5P26'	noncoding_pseudogene
10	71572451	71572541	+	ENSG00000222631	Ensembl	'AC025426.1'	noncoding_miRNA
10	71605888	71607695	+	CATG00000115532	FANTOM5	'CATG00000115532.1'	noncoding_sense_overlap_RNA
10	71618970	71619055	-	ENSG00000266082	Ensembl	'AL138925.1'	noncoding_miRNA
10	66660894	66684276	-	ENSG00000224714	Ensembl	'RP11-179K3.2'	noncoding_lncRNA_lincRNA
10	67857692	67881540	+	ENSG00000273360	FANTOM5	'RP11-210G22.1'	noncoding_lncRNA_noncoding_antisense
10	70020203	70097033	-	ENSG00000108187	FANTOM5	'PBLD'	protein_coding
10	70434061	70434857	+	ENSG00000227583	FANTOM5	'RP11-119F7.3'	noncoding_pseudogene
10	70530959	70545975	-	CATG00000118433	FANTOM5	'CATG00000118433.1'	noncoding_lncRNA_divergent
10	70715926	70745001	+	ENSG00000165732	FANTOM5	'DDX21'	protein_coding
10	70716403	70778739	+	ENSG00000198954	FANTOM5	'KIAA1279'	protein_coding
10	70939622	70971152	+	ENSG00000156502	FANTOM5	'SUPV3L1'	protein_coding
10	70972994	70992587	-	ENSG00000229261	FANTOM5	'RP11-227H15.4'	noncoding_lncRNA_divergent
10	70977199	71027391	+	ENSG00000156510	FANTOM5	'HKDC1'	protein_coding
10	71176797	71272649	+	ENSG00000099282	FANTOM5	'TSPAN15'	protein_coding
10	71243755	71254785	-	CATG00000000018	FANTOM5	'CATG00000000018.1'	protein_coding
10	71269423	71297792	-	CATG00000000020	FANTOM5	'CATG00000000020.1'	protein_coding
10	71332437	71349562	+	ENSG00000236154	FANTOM5	'RP11-343J3.2'	noncoding_lncRNA_divergent
10	71390010	71406920	+	ENSG00000171224	FANTOM5	'C10orf35'	protein_coding
10	71444655	71452208	+	ENSG00000235645	FANTOM5	'RP11-242G20.1'	protein_coding
10	71528831	71561382	-	CATG00000000025	FANTOM5	'CATG00000000025.1'	noncoding_lncRNA_divergent
10	71753613	71771346	-	CATG00000000027	FANTOM5	'CATG00000000027.1'	noncoding_lncRNA_intergenic
10	71754382	71767592	-	ENSG00000224222	Ensembl	'RP11-262I2.2'	noncoding_lncRNA_lincRNA
10	71777492	71779228	-	CATG00000000029	FANTOM5	'CATG00000000029.1'	noncoding_lncRNA_intergenic
10	66499455	66626699	+	CATG00000115402	FANTOM5	'CATG00000115402.1'	noncoding_lncRNA_intergenic
10	67330294	67526299	+	ENSG00000228065	FANTOM5	'RP11-222A11.1'	noncoding_lncRNA_intergenic
10	67486643	67651262	-	CATG00000118363	FANTOM5	'CATG00000118363.1'	noncoding_lncRNA_intergenic
10	68685794	68872670	+	ENSG00000198739	FANTOM5	'LRRTM3'	protein_coding
10	68812367	68814786	+	ENSG00000225299	Ensembl	'RP11-344A5.1'	noncoding_antisense
10	69556427	69609950	-	ENSG00000108176	FANTOM5	'DNAJC12'	protein_coding
10	69643983	69852251	+	ENSG00000096717	FANTOM5	'SIRT1'	protein_coding
10	69676671	69835040	-	ENSG00000148634	FANTOM5	'HERC4'	protein_coding
10	69847654	69983814	+	ENSG00000138347	FANTOM5	'MYPN'	protein_coding
10	70098955	70167034	-	ENSG00000204130	FANTOM5	'RUFY2'	protein_coding
10	70320094	70462032	+	ENSG00000138336	FANTOM5	'TET1'	protein_coding
10	70480768	70565825	+	ENSG00000060339	FANTOM5	'CCAR1'	protein_coding
10	70587288	70659539	+	ENSG00000165730	FANTOM5	'STOX1'	protein_coding
10	70661071	70828462	+	ENSG00000107625	FANTOM5	'DDX50'	protein_coding
10	70666709	70868290	+	ENSG00000122862	FANTOM5	'SRGN'	protein_coding
10	70883233	70934477	+	ENSG00000122958	FANTOM5	'VPS26A'	protein_coding
10	71029761	71171196	+	ENSG00000156515	FANTOM5	'HK1'	protein_coding
10	71159971	71176674	-	ENSG00000075073	FANTOM5	'TACR2'	protein_coding
10	71561662	71718904	+	ENSG00000197467	FANTOM5	'COL13A1'	protein_coding
10	71682039	71716494	-	CATG00000000026	FANTOM5	'CATG00000000026.1'	noncoding_lncRNA_noncoding_antisense
10	67672202	69524178	-	ENSG00000183230	FANTOM5	'CTNNA3'	protein_coding
10	70172207	70281033	-	ENSG00000138346	FANTOM5	'DNA2'	protein_coding
10	70191720	70287244	-	ENSG00000122912	FANTOM5	'SLC25A16'	protein_coding
10	74402769	74404408	+	ENSG00000238215	Ensembl	'RP11-167P22.5'	noncoding_pseudogene
10	74413923	74414034	-	ENSG00000201881	Ensembl	'Y_RNA'	noncoding_misc_RNA
10	74447481	74448066	-	CATG00000000134	FANTOM5	'CATG00000000134.1'	noncoding_lncRNA_intergenic
10	74451294	74452230	-	CATG00000000135	FANTOM5	'CATG00000000135.1'	noncoding_lncRNA_divergent
10	74455966	74460314	+	CATG00000115604	FANTOM5	'CATG00000115604.1'	noncoding_lncRNA_noncoding_sense_intronic
10	74470330	74470764	+	CATG00000115607	FANTOM5	'CATG00000115607.1'	noncoding_lncRNA_noncoding_sense_intronic
10	74480842	74480858	+	ENSG00000266719	FANTOM5	'MIR4676'	noncoding_small_RNA
10	74526318	74526810	+	ENSG00000272627	Ensembl	'RP11-354E23.5'	noncoding_sense_intronic
10	74620089	74620267	-	CATG00000000137	FANTOM5	'CATG00000000137.1'	noncoding_short_ncRNA
10	74765591	74766385	-	ENSG00000213700	FANTOM5	'RPL17P50'	noncoding_pseudogene
10	74824884	74825225	+	ENSG00000232646	Ensembl	'RP11-344N10.4'	noncoding_pseudogene
10	74831053	74833766	+	ENSG00000237768	Ensembl	'RP11-344N10.2'	noncoding_antisense
10	74842252	74842353	-	ENSG00000201047	Ensembl	'Y_RNA'	noncoding_misc_RNA
10	74862761	74864255	+	CATG00000115617	FANTOM5	'CATG00000115617.1'	noncoding_lncRNA_intergenic
10	74884331	74885163	-	ENSG00000272599	Ensembl	'RP11-152N13.16'	noncoding_antisense
10	74885838	74885965	-	ENSG00000221164	Ensembl	'SNORA11'	noncoding_snoRNA
10	74951981	74952083	-	ENSG00000199201	Ensembl	'Y_RNA'	noncoding_misc_RNA
10	74959636	74960983	+	ENSG00000227382	FANTOM5	'EIF4A2P2'	noncoding_pseudogene
10	75006752	75014727	+	ENSG00000227540	FANTOM5	'RP11-152N13.5'	noncoding_lncRNA_divergent
10	75038820	75038926	+	ENSG00000200356	Ensembl	'RNU6-833P'	noncoding_snRNA
10	75061539	75061639	-	ENSG00000238983	FANTOM5	'snoU13'	noncoding_small_RNA
10	75106694	75106806	+	ENSG00000207473	Ensembl	'Y_RNA'	noncoding_misc_RNA
10	75141191	75143254	+	ENSG00000233144	Ensembl	'RP11-537A6.9'	noncoding_antisense
10	75170692	75171626	-	CATG00000000150	FANTOM5	'CATG00000000150.1'	noncoding_lncRNA_noncoding_sense_intronic
10	75173934	75174801	+	CATG00000115622	FANTOM5	'CATG00000115622.1'	noncoding_lncRNA_divergent
10	75182017	75182496	-	ENSG00000229659	FANTOM5	'RP11-345K20.2'	noncoding_pseudogene
10	75188425	75188494	+	ENSG00000266344	Ensembl	'AL353731.1'	noncoding_miRNA
10	75242534	75248309	-	CATG00000000152	FANTOM5	'CATG00000000152.1'	noncoding_lncRNA_noncoding_sense_intronic
10	75288809	75288915	-	ENSG00000207327	Ensembl	'RNU6-883P'	noncoding_snRNA
10	75297561	75298149	+	ENSG00000237139	Ensembl	'RP11-137L10.5'	noncoding_pseudogene
10	75385849	75391248	+	ENSG00000268584	FANTOM5	'RP11-464F9.20'	noncoding_lncRNA_divergent
10	75390314	75391248	+	ENSG00000272791	Ensembl	'RP11-464F9.22'	noncoding_lncRNA_lincRNA
10	75466248	75466371	+	ENSG00000252072	Ensembl	'RNA5SP320'	noncoding_rRNA
10	75473354	75473609	-	ENSG00000224005	Ensembl	'AC022400.1'	noncoding_pseudogene
10	75491554	75493396	+	ENSG00000235316	FANTOM5	'DUSP8P5'	noncoding_pseudogene
10	75500296	75500581	-	ENSG00000270808	Ensembl	'RP11-574K11.27'	noncoding_pseudogene
10	75531765	75532732	-	ENSG00000267964	FANTOM5	'AC022400.2'	protein_coding
10	75532061	75540303	+	ENSG00000196968	FANTOM5	'FUT11'	protein_coding
10	75534080	75534299	-	ENSG00000253045	Ensembl	'RMRPP1'	noncoding_misc_RNA
10	75538155	75541711	-	CATG00000000155	FANTOM5	'CATG00000000155.1'	noncoding_lncRNA_divergent
10	75541808	75543410	+	ENSG00000172586	FANTOM5	'CHCHD1'	protein_coding
10	75556272	75561157	-	ENSG00000272589	Ensembl	'ZSWIM8-AS1'	noncoding_antisense
10	75573276	75574495	+	ENSG00000224195	Ensembl	'RP11-574K11.5'	noncoding_antisense
10	75601591	75606324	+	ENSG00000229990	Ensembl	'RP11-574K11.8'	noncoding_antisense
10	75634481	75637991	+	CATG00000115633	FANTOM5	'CATG00000115633.1'	noncoding_lncRNA_divergent
10	75645854	75648935	-	CATG00000000159	FANTOM5	'CATG00000000159.1'	noncoding_lncRNA_intergenic
10	75666719	75667071	+	CATG00000115636	FANTOM5	'CATG00000115636.1'	noncoding_lncRNA_intergenic
10	75686426	75686752	+	CATG00000115637	FANTOM5	'CATG00000115637.1'	noncoding_lncRNA_intergenic
10	75725630	75725934	-	CATG00000000161	FANTOM5	'CATG00000000161.1'	noncoding_lncRNA_intergenic
10	75810676	75811157	+	CATG00000115640	FANTOM5	'CATG00000115640.1'	noncoding_lncRNA_noncoding_sense_intronic
10	75880013	75880621	-	ENSG00000267957	Ensembl	'RP11-178G16.4'	noncoding_lncRNA_lincRNA
10	75880800	75881121	+	ENSG00000269772	Ensembl	'RP11-178G16.5'	noncoding_lncRNA_lincRNA
10	75928937	75929407	+	CATG00000115645	FANTOM5	'CATG00000115645.1'	noncoding_lncRNA_noncoding_sense_intronic
10	76104308	76104563	-	ENSG00000236900	Ensembl	'TIMM9P1'	noncoding_pseudogene
10	76131293	76132174	+	ENSG00000214629	Ensembl	'RPSAP6'	noncoding_pseudogene
10	76183193	76183772	-	ENSG00000213731	Ensembl	'RAB5CP1'	noncoding_pseudogene
10	76287342	76287705	+	ENSG00000226253	Ensembl	'MRPL35P3'	noncoding_pseudogene
10	76311150	76311251	+	ENSG00000206756	Ensembl	'Y_RNA'	noncoding_misc_RNA
10	76401168	76401534	-	ENSG00000271710	Ensembl	'RP11-312P12.3'	noncoding_pseudogene
10	76504144	76504465	-	ENSG00000213525	Ensembl	'RP11-383B24.3'	noncoding_pseudogene
10	76581368	76581888	-	ENSG00000272748	Ensembl	'RP11-222G7.2'	noncoding_lncRNA_lincRNA
10	76584756	76585072	-	CATG00000000163	FANTOM5	'CATG00000000163.1'	noncoding_lncRNA_divergent
10	76782264	76784787	-	ENSG00000227186	FANTOM5	'RP11-77G23.5'	noncoding_lncRNA_divergent
10	76785859	76788450	-	CATG00000000165	FANTOM5	'CATG00000000165.1'	noncoding_lncRNA_noncoding_antisense
10	76849006	76849483	-	ENSG00000237882	Ensembl	'PPIAP13'	noncoding_pseudogene
10	76884975	76885620	+	ENSG00000232437	Ensembl	'RP11-487I5.4'	noncoding_pseudogene
10	76944716	76944816	+	ENSG00000263626	Ensembl	'AL392111.1'	noncoding_miRNA
10	76951469	76952348	+	CATG00000115662	FANTOM5	'CATG00000115662.1'	noncoding_lncRNA_intergenic
10	76951650	76952029	-	CATG00000000167	FANTOM5	'CATG00000000167.1'	noncoding_lncRNA_intergenic
10	76989468	76995715	-	ENSG00000165644	FANTOM5	'COMTD1'	protein_coding
10	77029150	77029303	-	ENSG00000227271	Ensembl	'RPL39P25'	noncoding_pseudogene
10	77036134	77036584	-	ENSG00000233313	FANTOM5	'HMGA1P5'	noncoding_pseudogene
10	77048091	77048440	-	ENSG00000223428	Ensembl	'RP11-399K21.5'	noncoding_pseudogene
10	77142151	77142652	-	ENSG00000236797	FANTOM5	'SPA17P1'	noncoding_pseudogene
10	77168727	77169352	-	ENSG00000273248	FANTOM5	'RP11-399K21.13'	noncoding_lncRNA_intergenic
10	77185648	77191511	-	ENSG00000236842	FANTOM5	'RP11-399K21.10'	noncoding_lncRNA_divergent
10	77333757	77338199	+	CATG00000115668	FANTOM5	'CATG00000115668.1'	noncoding_lncRNA_intergenic
10	77345279	77345834	+	CATG00000115671	FANTOM5	'CATG00000115671.1'	noncoding_lncRNA_intergenic
10	77402234	77402857	+	ENSG00000268659	Ensembl	'RP11-310J24.3'	noncoding_sense_intronic
10	77502498	77503513	+	ENSG00000228280	Ensembl	'RP11-367B6.2'	noncoding_sense_intronic
10	77583444	77583536	-	ENSG00000215921	Ensembl	'AL731568.1'	noncoding_miRNA
10	77887009	77887069	-	ENSG00000221232	Ensembl	'AC012047.1'	noncoding_miRNA
10	78001782	78002071	-	ENSG00000265486	Ensembl	'RN7SL518P'	noncoding_misc_RNA
10	78197166	78198533	-	ENSG00000230575	Ensembl	'RP11-369F10.2'	noncoding_antisense
10	78318108	78320752	-	ENSG00000269256	Ensembl	'RP11-325D15.2'	noncoding_antisense
10	78321895	78324986	+	CATG00000115678	FANTOM5	'CATG00000115678.1'	noncoding_lncRNA_intergenic
10	78595135	78595260	-	ENSG00000252888	Ensembl	'SNORA31'	noncoding_snoRNA
10	78596154	78596619	+	ENSG00000224948	FANTOM5	'ATP5G1P8'	noncoding_pseudogene
10	78639826	78641655	-	CATG00000000180	FANTOM5	'CATG00000000180.1'	noncoding_sense_overlap_RNA
10	78907410	78909858	+	ENSG00000225497	Ensembl	'RP11-180I22.2'	noncoding_antisense
10	79007037	79018065	+	CATG00000115687	FANTOM5	'CATG00000115687.1'	noncoding_lncRNA_noncoding_antisense
10	79073699	79075452	+	ENSG00000224500	Ensembl	'RP11-328K22.1'	noncoding_antisense
10	79110653	79116959	+	CATG00000115688	FANTOM5	'CATG00000115688.1'	noncoding_lncRNA_divergent
10	79193330	79193540	-	ENSG00000228092	Ensembl	'COX6CP15'	noncoding_pseudogene
10	79279464	79280281	-	CATG00000000183	FANTOM5	'CATG00000000183.1'	noncoding_lncRNA_noncoding_sense_intronic
10	79346807	79346917	+	ENSG00000199592	Ensembl	'RNA5SP321'	noncoding_rRNA
10	79368202	79369541	-	CATG00000000192	FANTOM5	'CATG00000000192.1'	noncoding_sense_overlap_RNA
10	79376740	79378430	-	CATG00000000195	FANTOM5	'CATG00000000195.1'	noncoding_lncRNA_noncoding_sense_intronic
10	79386854	79388406	-	CATG00000000196	FANTOM5	'CATG00000000196.1'	noncoding_sense_overlap_RNA
10	79429692	79434351	-	CATG00000000200	FANTOM5	'CATG00000000200.1'	noncoding_lncRNA_intergenic
10	79490524	79494527	+	ENSG00000213514	Ensembl	'RP11-428P16.2'	noncoding_pseudogene
10	79505483	79506085	-	CATG00000000204	FANTOM5	'CATG00000000204.1'	noncoding_lncRNA_intergenic
10	79523672	79525202	+	CATG00000115698	FANTOM5	'CATG00000115698.1'	noncoding_lncRNA_intergenic
10	79536709	79536813	-	ENSG00000199664	Ensembl	'RNU6-1266P'	noncoding_snRNA
10	79540095	79541553	-	ENSG00000213513	FANTOM5	'RP13-39P12.2'	noncoding_pseudogene
10	79582526	79583060	-	CATG00000000205	FANTOM5	'CATG00000000205.1'	noncoding_lncRNA_noncoding_sense_intronic
10	79660896	79671963	-	ENSG00000243446	FANTOM5	'RN7SL284P'	noncoding_lncRNA_noncoding_sense_intronic
10	79713253	79713634	+	ENSG00000234612	Ensembl	'H2AFZP5'	noncoding_pseudogene
10	79784320	79784465	+	CATG00000115703	FANTOM5	'CATG00000115703.1'	noncoding_short_ncRNA
10	79789703	79789903	+	CATG00000115704	FANTOM5	'CATG00000115704.1'	noncoding_lncRNA_divergent
10	79795263	79800453	-	CATG00000000211	FANTOM5	'CATG00000000211.1'	noncoding_lncRNA_noncoding_antisense
10	79828381	79829296	-	ENSG00000231957	Ensembl	'GNAI2P2'	noncoding_pseudogene
10	80015252	80015759	+	CATG00000115714	FANTOM5	'CATG00000115714.1'	noncoding_lncRNA_noncoding_sense_intronic
10	80053442	80068426	+	ENSG00000229543	FANTOM5	'RP11-90J7.2'	noncoding_lncRNA_noncoding_sense_intronic
10	80112354	80115857	+	ENSG00000230229	Ensembl	'RP11-90J7.4'	noncoding_lncRNA_lincRNA
10	80127264	80127380	+	ENSG00000201393	Ensembl	'SNORA71'	noncoding_snoRNA
10	80455819	80456779	-	ENSG00000228683	Ensembl	'RP11-31E13.2'	noncoding_lncRNA_lincRNA
10	80510359	80510454	+	ENSG00000223243	Ensembl	'AC074323.1'	noncoding_miRNA
10	80516844	80517899	+	CATG00000115726	FANTOM5	'CATG00000115726.1'	noncoding_lncRNA_intergenic
10	80760241	80763560	-	ENSG00000229569	Ensembl	'RP11-481G8.2'	noncoding_lncRNA_lincRNA
10	80891155	80894313	+	CATG00000115731	FANTOM5	'CATG00000115731.1'	noncoding_lncRNA_noncoding_sense_intronic
10	80925782	80929814	+	CATG00000115734	FANTOM5	'CATG00000115734.1'	protein_coding
10	80968011	80968153	-	CATG00000000225	FANTOM5	'CATG00000000225.1'	noncoding_short_ncRNA
10	81025244	81026406	+	CATG00000115736	FANTOM5	'CATG00000115736.1'	noncoding_lncRNA_noncoding_sense_intronic
10	81056672	81060649	-	CATG00000000226	FANTOM5	'CATG00000000226.1'	protein_coding
10	81075261	81075963	-	CATG00000000229	FANTOM5	'CATG00000000229.1'	noncoding_sense_overlap_RNA
10	81082076	81083124	-	CATG00000000231	FANTOM5	'CATG00000000231.1'	noncoding_lncRNA_intergenic
10	81088694	81090084	+	CATG00000115741	FANTOM5	'CATG00000115741.1'	noncoding_lncRNA_intergenic
10	81090384	81091623	-	CATG00000000232	FANTOM5	'CATG00000000232.1'	noncoding_lncRNA_intergenic
10	81091286	81091878	+	CATG00000115742	FANTOM5	'CATG00000115742.1'	noncoding_lncRNA_intergenic
10	81093644	81095045	+	CATG00000115743	FANTOM5	'CATG00000115743.1'	noncoding_lncRNA_intergenic
10	81101431	81107109	-	CATG00000000233	FANTOM5	'CATG00000000233.1'	noncoding_lncRNA_divergent
10	81259422	81259740	-	ENSG00000259021	Ensembl	'TPRX1P1'	noncoding_pseudogene
10	81266126	81270678	-	ENSG00000235705	Ensembl	'AL133481.1'	protein_coding
10	81270301	81270439	-	ENSG00000272475	Ensembl	'RP11-342M3.2'	noncoding_pseudogene
10	81272289	81276188	+	ENSG00000253626	FANTOM5	'EIF5AL1'	protein_coding
10	81286264	81286387	-	ENSG00000271985	Ensembl	'RP11-589B3.7'	noncoding_pseudogene
10	81303825	81304112	+	ENSG00000232965	FANTOM5	'RPS12P18'	noncoding_pseudogene
10	81315417	81320163	-	ENSG00000185303	FANTOM5	'SFTPA2'	protein_coding
10	81342054	81344633	-	ENSG00000219430	Ensembl	'MBL3P'	noncoding_pseudogene
10	81355050	81355416	-	ENSG00000225827	Ensembl	'SFTPA3P'	noncoding_pseudogene
10	81388513	81391944	-	ENSG00000226676	Ensembl	'RP11-589B3.6'	noncoding_lncRNA_lincRNA
10	81422948	81424542	+	ENSG00000272489	Ensembl	'RP11-182L21.5'	noncoding_sense_intronic
10	81444250	81444739	-	ENSG00000224886	Ensembl	'BEND3P3'	noncoding_pseudogene
10	81462983	81474437	+	ENSG00000188199	Ensembl	'NUTM2B'	protein_coding
10	81620329	81621562	+	ENSG00000214695	Ensembl	'NPAP1P2'	noncoding_pseudogene
10	81630131	81633659	-	ENSG00000204437	Ensembl	'CTSLP6'	noncoding_pseudogene
10	81651904	81652941	-	ENSG00000214584	FANTOM5	'PGGT1BP2'	noncoding_pseudogene
10	81727969	81732969	+	ENSG00000273372	Ensembl	'RP11-479O17.10'	noncoding_lncRNA_lincRNA
10	81741577	81741968	+	ENSG00000235924	FANTOM5	'ZNRF2P3'	noncoding_pseudogene
10	81742666	81742996	-	ENSG00000225100	Ensembl	'RP11-479O17.7'	noncoding_pseudogene
10	81784493	81784978	-	ENSG00000224760	FANTOM5	'C1DP3'	noncoding_pseudogene
10	81791600	81792149	-	ENSG00000236217	Ensembl	'C1DP2'	noncoding_pseudogene
10	81885732	81886073	+	ENSG00000230171	FANTOM5	'RPL22P18'	noncoding_pseudogene
10	81975607	81975875	-	ENSG00000234319	Ensembl	'RPS12P2'	noncoding_pseudogene
10	82009466	82013395	+	ENSG00000204038	Ensembl	'AL359195.1'	protein_coding
10	82021923	82024673	-	CATG00000000244	FANTOM5	'CATG00000000244.1'	noncoding_lncRNA_intergenic
10	82057476	82059411	+	ENSG00000232950	Ensembl	'RP11-36D19.4'	noncoding_pseudogene
10	82093527	82094182	+	ENSG00000235858	Ensembl	'RP11-36D19.8'	noncoding_lncRNA_lincRNA
10	82194765	82196869	+	ENSG00000271738	Ensembl	'RP11-137H2.6'	noncoding_lncRNA_lincRNA
10	82211276	82213861	-	CATG00000000249	FANTOM5	'CATG00000000249.1'	noncoding_lncRNA_divergent
10	82283180	82295768	-	ENSG00000226659	FANTOM5	'RP11-137H2.4'	noncoding_lncRNA_divergent
10	82476239	82476824	-	ENSG00000233353	Ensembl	'RPS7P9'	noncoding_pseudogene
10	82535921	82537803	-	ENSG00000231060	FANTOM5	'FARSBP1'	noncoding_pseudogene
10	82654353	82657070	+	CATG00000115765	FANTOM5	'CATG00000115765.1'	noncoding_lncRNA_intergenic
10	82700421	82700957	-	ENSG00000227209	Ensembl	'WARS2P1'	noncoding_pseudogene
10	82717142	82717702	+	CATG00000115771	FANTOM5	'CATG00000115771.1'	noncoding_lncRNA_intergenic
10	82896296	82897091	-	ENSG00000226466	Ensembl	'RPA2P2'	noncoding_pseudogene
10	82904408	82904487	+	ENSG00000265990	Ensembl	'AL356154.1'	noncoding_miRNA
10	83629968	83634807	-	CATG00000000263	FANTOM5	'CATG00000000263.1'	noncoding_lncRNA_divergent
10	84100527	84100632	+	ENSG00000207275	Ensembl	'RNU6-441P'	noncoding_snRNA
10	84235266	84237989	+	CATG00000115794	FANTOM5	'CATG00000115794.1'	noncoding_sense_overlap_RNA
10	84827718	84827827	-	ENSG00000200774	Ensembl	'RNU6-478P'	noncoding_snRNA
10	85071384	85074231	-	ENSG00000234931	Ensembl	'MARK2P15'	noncoding_pseudogene
10	85299977	85310935	+	CATG00000115819	FANTOM5	'CATG00000115819.1'	noncoding_lncRNA_intergenic
10	85432162	85435195	-	ENSG00000233945	Ensembl	'RP11-344L13.2'	noncoding_lncRNA_lincRNA
10	85495262	85496249	+	ENSG00000223565	Ensembl	'RP11-344L13.1'	noncoding_pseudogene
10	85524114	85524220	+	ENSG00000212324	Ensembl	'RNU6-129P'	noncoding_snRNA
10	85763088	85763235	+	ENSG00000200789	FANTOM5	'RNU1-65P'	noncoding_small_RNA
10	85841087	85841751	+	ENSG00000212769	FANTOM5	'HMGN2P8'	noncoding_pseudogene
10	85891155	85891474	+	CATG00000115825	FANTOM5	'CATG00000115825.1'	noncoding_lncRNA_intergenic
10	85898176	85900338	-	ENSG00000271933	Ensembl	'RP11-338I21.1'	noncoding_antisense
10	85997153	85997784	+	CATG00000115829	FANTOM5	'CATG00000115829.1'	noncoding_lncRNA_divergent
10	86148926	86149382	-	ENSG00000233189	Ensembl	'RPL12P29'	noncoding_pseudogene
10	86150664	86151801	+	ENSG00000225423	Ensembl	'TNPO1P1'	noncoding_pseudogene
10	86214435	86215812	-	ENSG00000225928	Ensembl	'CACYBPP1'	noncoding_pseudogene
10	86320173	86321062	+	ENSG00000178429	FANTOM5	'RPS3AP5'	noncoding_pseudogene
10	86623021	86623118	+	ENSG00000238469	Ensembl	'AC091487.1'	noncoding_miRNA
10	86953177	86957714	-	ENSG00000237267	Ensembl	'RP11-181F12.1'	noncoding_lncRNA_lincRNA
10	74653344	74695499	+	ENSG00000138315	FANTOM5	'OIT3'	protein_coding
10	74677103	74678391	-	ENSG00000215086	FANTOM5	'NPM1P24'	noncoding_pseudogene
10	74856786	74860523	+	CATG00000115616	FANTOM5	'CATG00000115616.1'	noncoding_lncRNA_divergent
10	74857802	74861142	-	ENSG00000272630	FANTOM5	'RP11-344N10.5'	noncoding_lncRNA_intergenic
10	74870280	74893128	+	ENSG00000166321	FANTOM5	'NUDT13'	protein_coding
10	74994181	75012377	-	ENSG00000182180	FANTOM5	'MRPS16'	protein_coding
10	75006752	75049075	+	ENSG00000236756	FANTOM5	'DNAJC9-AS1'	noncoding_lncRNA_divergent
10	75119745	75173816	-	ENSG00000138279	FANTOM5	'ANXA7'	protein_coding
10	75183339	75193319	-	ENSG00000166343	FANTOM5	'MSS51'	protein_coding
10	75255479	75279828	+	ENSG00000221817	FANTOM5	'RP11-137L10.6'	noncoding_lncRNA_divergent
10	75391412	75407238	-	ENSG00000177791	FANTOM5	'MYOZ1'	protein_coding
10	75404639	75423561	-	ENSG00000166317	FANTOM5	'SYNPO2L'	protein_coding
10	75407325	75434477	+	ENSG00000271848	FANTOM5	'RP11-464F9.21'	noncoding_lncRNA_divergent
10	75434033	75457639	-	ENSG00000172650	Ensembl	'AGAP5'	protein_coding
10	75454565	75490252	-	ENSG00000271816	FANTOM5	'RP11-574K11.28'	noncoding_lncRNA_divergent
10	75463493	75473339	-	ENSG00000272140	Ensembl	'RP11-574K11.29'	noncoding_lncRNA_lincRNA
10	75475601	75490252	-	ENSG00000242338	FANTOM5	'BMS1P4'	noncoding_pseudogene
10	75504130	75532642	+	ENSG00000176986	FANTOM5	'SEC24C'	protein_coding
10	75543044	75564747	+	ENSG00000214655	FANTOM5	'ZSWIM8'	protein_coding
10	75551433	75574982	-	ENSG00000272916	FANTOM5	'RP11-574K11.31'	protein_coding
10	75561494	75597272	-	ENSG00000166507	FANTOM5	'NDST2'	protein_coding
10	75570427	75588367	+	CATG00000115631	FANTOM5	'CATG00000115631.1'	noncoding_lncRNA_divergent
10	75597230	75621158	+	CATG00000115632	FANTOM5	'CATG00000115632.1'	protein_coding
10	75659598	75661534	+	CATG00000115635	FANTOM5	'CATG00000115635.1'	noncoding_lncRNA_intergenic
10	75666078	75682535	-	ENSG00000222047	FANTOM5	'C10orf55'	protein_coding
10	75764895	75787673	+	ENSG00000225761	Ensembl	'RP11-417O11.5'	noncoding_sense_intronic
10	76762813	76784965	-	ENSG00000234149	FANTOM5	'RP11-77G23.2'	noncoding_lncRNA_divergent
10	76850877	76868945	-	ENSG00000079393	FANTOM5	'DUSP13'	protein_coding
10	76969355	77000965	+	ENSG00000165637	FANTOM5	'VDAC2'	protein_coding
10	77151417	77161522	-	ENSG00000165655	FANTOM5	'ZNF503'	protein_coding
10	77158339	77172240	+	ENSG00000237149	FANTOM5	'ZNF503-AS2'	noncoding_lncRNA_intergenic
10	77158339	77172240	+	ENSG00000272692	FANTOM5	'RP11-399K21.14'	noncoding_lncRNA_intergenic
10	77258678	77318115	+	ENSG00000207583	FANTOM5	'MIR606'	noncoding_small_RNA
10	77758285	77793359	-	CATG00000000175	FANTOM5	'CATG00000000175.1'	noncoding_lncRNA_divergent
10	78020558	78020661	-	ENSG00000201954	Ensembl	'RNU6-673P'	noncoding_snRNA
10	78647065	78770039	+	ENSG00000236467	FANTOM5	'RP11-443A13.5'	noncoding_lncRNA_noncoding_antisense
10	79114162	79136371	+	ENSG00000225652	Ensembl	'RP11-619F23.2'	noncoding_antisense
10	79182782	79190091	+	CATG00000115691	FANTOM5	'CATG00000115691.1'	noncoding_lncRNA_noncoding_antisense
10	79314107	79315391	-	CATG00000000187	FANTOM5	'CATG00000000187.1'	noncoding_sense_overlap_RNA
10	79378547	79396002	+	CATG00000115694	FANTOM5	'CATG00000115694.1'	noncoding_lncRNA_noncoding_antisense
10	79542586	79552934	+	ENSG00000228748	FANTOM5	'RP13-39P12.3'	noncoding_lncRNA_divergent
10	79626643	79672103	+	ENSG00000204049	FANTOM5	'AL391421.1'	protein_coding
10	79728125	79793451	-	ENSG00000148606	FANTOM5	'POLR3A'	protein_coding
10	79793621	79816570	+	ENSG00000138326	FANTOM5	'RPS24'	protein_coding
10	79910761	79936562	-	CATG00000000214	FANTOM5	'CATG00000000214.1'	noncoding_lncRNA_intergenic
10	80416032	80436281	+	CATG00000115723	FANTOM5	'CATG00000115723.1'	noncoding_lncRNA_intergenic
10	80829924	80853047	+	CATG00000115729	FANTOM5	'CATG00000115729.1'	protein_coding
10	81066056	81072735	-	CATG00000000228	FANTOM5	'CATG00000000228.1'	protein_coding
10	81083267	81085304	+	CATG00000115738	FANTOM5	'CATG00000115738.1'	noncoding_lncRNA_intergenic
10	81107225	81121813	+	ENSG00000108179	FANTOM5	'PPIF'	protein_coding
10	81133801	81206622	-	ENSG00000165424	FANTOM5	'ZCCHC24'	protein_coding
10	81142084	81169030	+	ENSG00000235426	Ensembl	'RP11-342M3.5'	noncoding_antisense
10	81205755	81216548	+	CATG00000115745	FANTOM5	'CATG00000115745.1'	protein_coding
10	81319167	81375212	+	ENSG00000122852	FANTOM5	'SFTPA1'	protein_coding
10	81355184	81374940	-	CATG00000000240	FANTOM5	'CATG00000000240.1'	noncoding_lncRNA_intergenic
10	81420647	81437248	+	ENSG00000244733	Ensembl	'RP11-506M13.3'	noncoding_lncRNA_lincRNA
10	81422844	81526085	-	ENSG00000226381	Ensembl	'RP11-119F19.2'	noncoding_antisense
10	81586495	81610830	+	ENSG00000272447	FANTOM5	'RP11-182L21.6'	noncoding_lncRNA_intergenic
10	81601114	81610632	+	ENSG00000228570	Ensembl	'NUTM2E'	protein_coding
10	81664643	81691594	+	ENSG00000242600	FANTOM5	'MBL1P'	noncoding_pseudogene
10	81690321	81742370	-	ENSG00000133661	FANTOM5	'SFTPD'	protein_coding
10	81755553	81778471	-	ENSG00000229616	FANTOM5	'RP11-369J21.11'	noncoding_pseudogene
10	81805952	81838949	-	ENSG00000230091	FANTOM5	'TMEM254-AS1'	noncoding_lncRNA_divergent
10	81838421	81858535	+	ENSG00000133678	FANTOM5	'TMEM254'	protein_coding
10	81891431	81918955	+	ENSG00000189129	FANTOM5	'PLAC9'	protein_coding
10	81967196	81984752	+	ENSG00000237523	FANTOM5	'LINC00857'	noncoding_lncRNA_intergenic
10	81993420	82005123	+	ENSG00000234382	Ensembl	'RP11-40F6.1'	noncoding_pseudogene
10	82026771	82049871	-	ENSG00000151224	FANTOM5	'MAT1A'	protein_coding
10	82081210	82116944	-	ENSG00000170788	FANTOM5	'DYDC1'	protein_coding
10	82116063	82128950	+	ENSG00000133665	FANTOM5	'DYDC2'	protein_coding
[truncated: 68,261 more rows]
