# Supplementary material for: An Integrative Analysis of Chromatin Interactions, Gene Expression and Genomic Variants Identifies 30 Likely Regulatory Variants in Prostate Cancer
Source: Preprints.org preprint supplement (doi:10.20944/preprints202301.0343.v1), 2023-01-19
Supplement: Supplementary file 4 [file SupplementaryTable4.xlsx]

## Sheet: Supplementary Table 4a
Supplementary Table 4a. List of identified enhancer-promoter interactions from Hi-C interactions in LNCaP cell line
Promoter								Enhancer
Fragment-ID1	Chromosome	Start	End	Promoter_region_of_gene	GeneName	GeneClass	Fragment-ID2	Chromosome	Start	End	promoter_region_of_gene	GeneName	GeneClass	Distance	Interacting_read	log(pvalue)
100021	3	7645000	7650000	RP11-157E16.1'	GRM7';'RP11-157E16.1'	noncoding_antisense;protein_coding	100024	3	7660000	7665000		'GRM7'	protein_coding	15000	22	17.0184
100237	3	8725000	8730000	OR7E122P'	'OR7E122P';'SSUH2'	noncoding_pseudogene;protein_coding	100241	3	8745000	8750000		'SSUH2'	protein_coding	20000	41	36.7368
100292	3	9000000	9005000	RAD18'	'RAD18'	protein_coding	100291	3	8995000	9000000		'RAD18'	protein_coding	5000	49	4.96643
100339	3	9235000	9240000	SRGAP3-AS2'	'SRGAP3';'SRGAP3-AS2'	noncoding_lncRNA_noncoding_antisense;protein_coding	100337	3	9225000	9230000		'SRGAP3'	protein_coding	10000	26	12.885
100369	3	9385000	9390000	PGAM1P4'	'RP11-380O24.1';'SRGAP3'	noncoding_lncRNA_divergent;protein_coding	100370	3	9390000	9395000	PGAM1P4'	'PGAM1P4';'RP11-380O24.1';'SETD5-AS1';'SRGAP3'	noncoding_lncRNA_divergent;noncoding_pseudogene;protein_coding	5000	182	36.7368
100376	3	9420000	9425000	THUMPD3'	'SETD5-AS1';'THUMPD3'	noncoding_lncRNA_divergent;protein_coding	100381	3	9445000	9450000		'SETD5'	protein_coding	25000	6	5.28491
100384	3	9460000	9465000	SETD5'	'CATG00000063700.1';'SETD5'	noncoding_lncRNA_divergent;protein_coding	100381	3	9445000	9450000		'SETD5'	protein_coding	15000	22	14.5253
100394	3	9510000	9515000	SETD5'	'CATG00000063702.1';'SETD5'	noncoding_lncRNA_divergent;protein_coding	100395	3	9515000	9520000	SETD5'	'SETD5'	protein_coding	5000	119	25.8859
100467	3	9875000	9880000	RPUSD3';TTLL3'	'ARPC4-TTLL3';'RPUSD3';'TTLL3'	protein_coding	100469	3	9885000	9890000	RPUSD3'	'RPUSD3';'TTLL3'	protein_coding	10000	38	21.4384
100492	3	10000000	10005000	RP11-1020A11.2'	'EMC3';'PRRT3-AS1';'RP11-1020A11.2'	noncoding_lncRNA_divergent;noncoding_lncRNA_intergenic;protein_coding	100494	3	10010000	10015000		'EMC3'	protein_coding	10000	14	5.39378
100510	3	10090000	10095000	FANCD2'	'FANCD2';'IRAK2'	protein_coding	100499	3	10035000	10040000		'AC034193.5';'EMC3';'IRAK2'	noncoding_pseudogene;protein_coding	55000	7	11.2584
100512	3	10100000	10105000	CYCSP11'	'FANCD2';'IRAK2'	protein_coding	103958	3	27330000	27335000	NEK10'	'NEK10'	protein_coding	17230000	6	7.55213
100543	3	10255000	10260000	RNU6-814P'	'IRAK2';'RNU6-814P'	noncoding_small_RNA;protein_coding	100541	3	10245000	10250000		'IRAK2'	protein_coding	10000	16	5.8021
100798	3	11530000	11535000	AC026185.1'	'ATG7'	protein_coding	100801	3	11545000	11550000		'ATG7'	protein_coding	15000	18	14.5077
100816	3	11620000	11625000	VGLL4'	'ATG7';'VGLL4'	protein_coding	100821	3	11645000	11650000	RP11-169K17.4';VGLL4'	'ATG7';'RP11-169K17.4';'VGLL4'	noncoding_antisense;protein_coding	25000	14	17.106
100822	3	11650000	11655000	RP11-169K17.3';VGLL4'	'RP11-169K17.3';'RP11-169K17.4';'VGLL4'	noncoding_antisense;protein_coding	100823	3	11655000	11660000	VGLL4'	'VGLL4'	protein_coding	5000	115	18.0926
100823	3	11655000	11660000	VGLL4'	'VGLL4'	protein_coding	100824	3	11660000	11665000		'VGLL4'	protein_coding	5000	56	6.82333
100825	3	11665000	11670000	VGLL4'	'VGLL4'	protein_coding	100826	3	11670000	11675000	VGLL4'	'VGLL4'	protein_coding	5000	65	8.51424
100827	3	11675000	11680000	VGLL4'	'VGLL4'	protein_coding	100829	3	11685000	11690000	VGLL4'	'VGLL4'	protein_coding	10000	16	6.09709
10097	1	50480000	50485000	MTND2P29'	'AGBL4';'MTND2P29'	noncoding_pseudogene;protein_coding	10098	1	50485000	50490000	AGBL4'	'AGBL4';'CATG00000000533.1'	noncoding_short_ncRNA;protein_coding	5000	94	12.3438
100970	3	12390000	12395000	PPARG'	'PPARG'	protein_coding	100971	3	12395000	12400000		'PPARG'	protein_coding	5000	123	16.5901
100976	3	12420000	12425000	PPARG'	'PPARG'	protein_coding	100977	3	12425000	12430000		'PPARG'	protein_coding	5000	60	8.63793
101002	3	12550000	12555000	RNA5SP123'	'RNA5SP123';'TSEN2'	noncoding_rRNA;protein_coding	101005	3	12565000	12570000		'C3orf83';'TSEN2'	protein_coding	15000	11	5.40412
101003	3	12555000	12560000	RNU6-377P'	'C3orf83';'RNU6-377P';'TSEN2'	noncoding_snRNA;protein_coding	101005	3	12565000	12570000		'C3orf83';'TSEN2'	protein_coding	10000	14	5.50511
101053	3	12805000	12810000	TMEM40'	'CAND2'	protein_coding	101056	3	12820000	12825000		'CAND2'	protein_coding	15000	12	6.86613
101054	3	12810000	12815000	TMEM40'	'CAND2'	protein_coding	101056	3	12820000	12825000		'CAND2'	protein_coding	10000	15	5.56086
10117	1	50580000	50585000	RP11-492I2.1'	'ELAVL4';'RP11-492I2.1'	noncoding_pseudogene;protein_coding	10118	1	50585000	50590000		'ELAVL4'	protein_coding	5000	237	36.7368
101227	3	13675000	13680000	FBLN2'	'CATG00000063822.1';'FBLN2'	noncoding_lncRNA_noncoding_antisense;protein_coding	101230	3	13690000	13695000	LINC00620'	'CATG00000063823.1';'FBLN2';'LINC00620'	noncoding_lncRNA_intergenic;protein_coding	15000	12	7.84778
101325	3	14165000	14170000	CHCHD4';TMEM43'	'CHCHD4';'TMEM43'	protein_coding	101324	3	14160000	14165000		'CHCHD4'	protein_coding	5000	187	36.7368
101327	3	14175000	14180000	RP11-434D12.1'	'RP11-434D12.1';'TMEM43'	protein_coding	101328	3	14180000	14185000		'CATG00000063830.1';'RP11-434D12.1';'TMEM43'	noncoding_lncRNA_noncoding_antisense;protein_coding	5000	79	10.7069
101360	3	14340000	14345000	RP11-536I6.2'	'RP11-536I6.2'	noncoding_lncRNA_intergenic	101359	3	14335000	14340000		'RP11-536I6.2'	noncoding_lncRNA_intergenic	5000	75	11.8395
101464	3	14860000	14865000	FGD5'	'FGD5'	protein_coding	101465	3	14865000	14870000		'FGD5'	protein_coding	5000	98	16.5658
101476	3	14920000	14925000	FGD5'	'FGD5';'FGD5-AS1'	noncoding_lncRNA_divergent;protein_coding	101475	3	14915000	14920000		'FGD5';'FGD5-AS1'	noncoding_lncRNA_divergent;protein_coding	5000	67	8.46119
101500	3	15040000	15045000	NR2C2'	'NR2C2'	protein_coding	101498	3	15030000	15035000		'NR2C2'	protein_coding	10000	20	8.02647
101519	3	15135000	15140000	ZFYVE20'	'ZFYVE20'	protein_coding	101520	3	15140000	15145000	ZFYVE20'	'CATG00000059260.1';'ZFYVE20'	noncoding_lncRNA_divergent;protein_coding	5000	57	8.4132
101526	3	15170000	15175000	AC090954.1';AC090954.5'	'AC090954.5'	noncoding_pseudogene	101521	3	15145000	15150000				25000	5	4.65805
101566	3	15370000	15375000	SH3BP5'	'SH3BP5'	protein_coding	101565	3	15365000	15370000		'SH3BP5'	protein_coding	5000	179	36.7368
101567	3	15375000	15380000	SH3BP5'	'SH3BP5'	protein_coding	101570	3	15390000	15395000		'CATG00000059262.1'	noncoding_lncRNA_divergent	15000	10	5.18674
101575	3	15415000	15420000	HMGN2P7'	'HMGN2P7'	noncoding_pseudogene	101576	3	15420000	15425000		'METTL6'	protein_coding	5000	148	25.4571
10159	1	50790000	50795000	RP11-183G22.1'	'CATG00000058214.1';'RP11-183G22.1'	noncoding_pseudogene;uncertain_coding	10160	1	50795000	50800000		'CATG00000058214.1'	uncertain_coding	5000	107	19.2072
101620	3	15640000	15645000	BTD';HACL1'	'BTD';'HACL1'	protein_coding	101621	3	15645000	15650000		'BTD'	protein_coding	5000	101	22.0474
101626	3	15670000	15675000	BTD'	'BTD'	protein_coding	101628	3	15680000	15685000		'BTD'	protein_coding	10000	16	5.74086
101635	3	15715000	15720000	ANKRD28'	'ANKRD28'	protein_coding	101636	3	15720000	15725000		'ANKRD28'	protein_coding	5000	166	27.0721
101637	3	15725000	15730000	ANKRD28'	'ANKRD28'	protein_coding	101636	3	15720000	15725000		'ANKRD28'	protein_coding	5000	109	21.9054
101659	3	15835000	15840000	ANKRD28'	'ANKRD28'	protein_coding	101660	3	15840000	15845000	ANKRD28'	'ANKRD28'	protein_coding	5000	88	13.5883
101660	3	15840000	15845000	ANKRD28'	'ANKRD28'	protein_coding	101661	3	15845000	15850000		'ANKRD28'	protein_coding	5000	85	15.5805
101671	3	15895000	15900000	ANKRD28'	'ANKRD28'	protein_coding	101672	3	15900000	15905000	ANKRD28'	'AC090945.1';'ANKRD28'	noncoding_pseudogene;protein_coding	5000	47	5.29177
101794	3	16510000	16515000	RFTN1'	'RFTN1'	protein_coding	101791	3	16495000	16500000		'RFTN1'	protein_coding	15000	17	10.9154
101794	3	16510000	16515000	RFTN1'	'RFTN1'	protein_coding	101796	3	16520000	16525000	RFTN1'	'RFTN1'	protein_coding	10000	26	11.1929
101821	3	16645000	16650000	DAZL'	'CATG00000059302.1';'DAZL'	noncoding_short_ncRNA;protein_coding	101822	3	16650000	16655000		'CATG00000059302.1';'CATG00000059303.1';'DAZL'	noncoding_lncRNA_noncoding_sense_intronic;noncoding_short_ncRNA;protein_coding	5000	169	30.8424
101877	3	16925000	16930000	PLCL2'	'CATG00000063894.1';'PLCL2'	protein_coding;uncertain_coding	101879	3	16935000	16940000		'PLCL2'	protein_coding	10000	31	15.7905
101993	3	17505000	17510000	AC140076.1'	'AC140076.1';'TBC1D5'	noncoding_pseudogene;protein_coding	101992	3	17500000	17505000		'TBC1D5'	protein_coding	5000	249	36.7368
101993	3	17505000	17510000	AC140076.1'	'AC140076.1';'TBC1D5'	noncoding_pseudogene;protein_coding	101996	3	17520000	17525000		'TBC1D5'	protein_coding	15000	19	12.0959
102025	3	17665000	17670000	TBC1D5'	'TBC1D5'	protein_coding	102027	3	17675000	17680000		'TBC1D5'	protein_coding	10000	31	15.4648
102033	3	17705000	17710000	U7'	'TBC1D5';'U7'	noncoding_snRNA;protein_coding	102032	3	17700000	17705000		'TBC1D5'	protein_coding	5000	70	6.81575
102047	3	17775000	17780000	TBC1D5'	'TBC1D5'	protein_coding	102046	3	17770000	17775000		'TBC1D5'	protein_coding	5000	49	5.34657
10215	1	51070000	51075000	FAF1'	'FAF1'	protein_coding	10214	1	51065000	51070000		'FAF1'	protein_coding	5000	117	20.3681
102329	3	19185000	19190000	KCNH8'	'CATG00000063915.1';'KCNH8'	noncoding_lncRNA_divergent;protein_coding	102331	3	19195000	19200000		'KCNH8'	protein_coding	10000	26	11.3762
10235	1	51170000	51175000	FAF1'	'FAF1'	protein_coding	10234	1	51165000	51170000		'FAF1'	protein_coding	5000	61	6.57205
102479	3	19935000	19940000	EFHB'	'EFHB'	protein_coding	102478	3	19930000	19935000		'EFHB'	protein_coding	5000	51	6.38794
102479	3	19935000	19940000	EFHB'	'EFHB'	protein_coding	102480	3	19940000	19945000	EFHB'	'EFHB'	protein_coding	5000	64	9.07976
102486	3	19970000	19975000	EFHB'	'CATG00000063920.1';'EFHB'	noncoding_lncRNA_noncoding_sense_intronic;protein_coding	102490	3	19990000	19995000	RAB5A'	'RAB5A'	protein_coding	20000	18	19.2405
10286	1	51425000	51430000	CDKN2C';FAF1'	'CATG00000058292.1';'CDKN2C';'FAF1'	protein_coding;uncertain_coding	10288	1	51435000	51440000	CDKN2C'	'CATG00000058292.1';'CATG00000058300.1';'CDKN2C'	noncoding_lncRNA_divergent;protein_coding;uncertain_coding	10000	53	32.4883
103273	3	23905000	23910000	UBE2E1'	'UBE2E1'	protein_coding	103271	3	23895000	23900000		'UBE2E1'	protein_coding	10000	27	12.0432
103284	3	23960000	23965000	RPL15'	'NKIRAS1';'RPL15'	protein_coding	103286	3	23970000	23975000		'NKIRAS1';'RPL15'	protein_coding	10000	16	6.59511
103289	3	23985000	23990000	NKIRAS1';NR1D2'	'CATG00000064016.1';'NKIRAS1';'NR1D2'	noncoding_lncRNA_divergent;protein_coding	103290	3	23990000	23995000		'NR1D2'	protein_coding	5000	69	7.21898
10331	1	51650000	51655000	AL162430.2'	'AL162430.2'	noncoding_miRNA	10332	1	51655000	51660000	AL162430.1';AL162430.2'	'AL162430.1';'RP11-296A18.3'	noncoding_lncRNA_divergent;noncoding_miRNA	5000	133	22.0605
10340	1	51695000	51700000	RP11-296A18.3';snoU13'	'RP11-296A18.3';'snoU13'	noncoding_lncRNA_divergent;noncoding_snoRNA	10342	1	51705000	51710000		'CATG00000058318.1';'RNF11'	protein_coding	10000	25	11.848
103400	3	24540000	24545000	RP11-317L10.1';THRB-AS1'	'CATG00000064028.1';'MIR4792';'RP11-317L10.1';'THRB-AS1'	noncoding_lncRNA_divergent;noncoding_lncRNA_intergenic;noncoding_lncRNA_lincRNA;noncoding_small_RNA	103401	3	24545000	24550000		'CATG00000064028.1';'MIR4792';'THRB-AS1'	noncoding_lncRNA_divergent;noncoding_lncRNA_intergenic;noncoding_small_RNA	5000	68	7.03037
103411	3	24595000	24600000	EIF3KP2'	'EIF3KP2'	noncoding_pseudogene	103410	3	24590000	24595000				5000	74	8.75751
103504	3	25060000	25065000	RN7SL216P'	'AC133680.1';'RN7SL216P'	noncoding_lncRNA_intergenic;noncoding_misc_RNA	103502	3	25050000	25055000		'AC133680.1'	noncoding_lncRNA_intergenic	10000	23	7.53707
103591	3	25495000	25500000	RARB'	'RARB'	protein_coding	103592	3	25500000	25505000	RARB'	'RARB'	protein_coding	5000	84	14.8536
103654	3	25810000	25815000	AC092798.1'	'AC092798.1';'NGLY1'	noncoding_miRNA;protein_coding	103656	3	25820000	25825000	NGLY1';OXSM'	'NGLY1';'OXSM'	protein_coding	10000	15	4.63736
10387	1	51930000	51935000	EPS15'	'EPS15'	protein_coding	10388	1	51935000	51940000		'EPS15'	protein_coding	5000	73	9.33413
103974	3	27410000	27415000	NEK10'	'CATG00000059538.1';'NEK10';'SLC4A7'	noncoding_lncRNA_divergent;protein_coding	103976	3	27420000	27425000		'CATG00000059538.1';'SLC4A7'	noncoding_lncRNA_divergent;protein_coding	10000	42	23.2567
104005	3	27565000	27570000	AC137675.1'	'AC137675.1'	noncoding_pseudogene	104004	3	27560000	27565000				5000	56	8.14265
104105	3	28065000	28070000	AC092415.1'	'AC092415.1';'CATG00000064063.1'	noncoding_lncRNA_lincRNA;protein_coding	104104	3	28060000	28065000		'AC092415.1';'CATG00000064063.1'	noncoding_lncRNA_lincRNA;protein_coding	5000	110	17.6457
104168	3	28380000	28385000	AZI2'	'AZI2'	protein_coding	104169	3	28385000	28390000	AZI2';ZCWPW2'	'AZI2'	protein_coding	5000	81	9.26539
10427	1	52130000	52135000	OSBPL9'	'OSBPL9'	protein_coding	10422	1	52105000	52110000		'OSBPL9'	protein_coding	25000	19	23.1199
10428	1	52135000	52140000	OSBPL9'	'OSBPL9'	protein_coding	10422	1	52105000	52110000		'OSBPL9'	protein_coding	30000	9	9.21954
10437	1	52180000	52185000	OSBPL9'	'OSBPL9'	protein_coding	10440	1	52195000	52200000	OSBPL9'	'OSBPL9'	protein_coding	15000	10	5.21512
10440	1	52195000	52200000	OSBPL9'	'OSBPL9'	protein_coding	10441	1	52200000	52205000		'OSBPL9'	protein_coding	5000	46	4.81691
10443	1	52210000	52215000	OSBPL9'	'OSBPL9'	protein_coding	10441	1	52200000	52205000		'OSBPL9'	protein_coding	10000	17	4.90041
104486	3	29970000	29975000	RBMS3-AS1'	'RBMS3';'RBMS3-AS1'	noncoding_antisense;protein_coding	104487	3	29975000	29980000	RBMS3-AS1'	'RBMS3';'RBMS3-AS1'	noncoding_antisense;protein_coding	5000	71	6.86826
104561	3	30345000	30350000	U3'	'CATG00000059666.1';'CATG00000064087.1';'U3'	noncoding_lncRNA_intergenic;noncoding_small_RNA	104562	3	30350000	30355000		'CATG00000064087.1'	noncoding_lncRNA_intergenic	5000	58	7.72022
104605	3	30565000	30570000	AC116035.1';AC116035.2'	'AC116035.1';'AC116035.2';'CATG00000059678.1';'CATG00000064106.1'	noncoding_lncRNA_intergenic;noncoding_lncRNA_lincRNA	104604	3	30560000	30565000		'AC116035.2';'CATG00000059678.1'	noncoding_lncRNA_intergenic	5000	85	14.3143
10461	1	52300000	52305000	MIR761';NRD1'	'MIR761';'NRD1'	noncoding_small_RNA;protein_coding	10464	1	52315000	52320000		'CATG00000058438.1';'NRD1'	noncoding_sense_overlap_RNA;protein_coding	15000	27	20.8558
104621	3	30645000	30650000	TGFBR2'	'CATG00000064109.1';'TGFBR2'	protein_coding;uncertain_coding	104619	3	30635000	30640000				10000	24	10.7094
10465	1	52320000	52325000	TSEN15P2'	'NRD1'	protein_coding	10464	1	52315000	52320000		'CATG00000058438.1';'NRD1'	noncoding_sense_overlap_RNA;protein_coding	5000	60	7.03446
10465	1	52320000	52325000	TSEN15P2'	'NRD1'	protein_coding	10468	1	52335000	52340000		'NRD1'	protein_coding	15000	13	7.01023
10467	1	52330000	52335000	Y_RNA'	'NRD1';'Y_RNA'	noncoding_misc_RNA;protein_coding	10468	1	52335000	52340000		'NRD1'	protein_coding	5000	108	17.3677
10469	1	52340000	52345000	NRD1'	'CATG00000000858.1';'NRD1'	noncoding_lncRNA_divergent;protein_coding	10468	1	52335000	52340000		'NRD1'	protein_coding	5000	97	13.8048
104753	3	31305000	31310000	AC115283.1'	'CATG00000064114.1'	uncertain_coding	104751	3	31295000	31300000		'CATG00000064114.1'	uncertain_coding	10000	16	4.6584
10488	1	52435000	52440000	RNA5SP48'	'RAB3B';'RNA5SP48'	noncoding_rRNA;protein_coding	10485	1	52420000	52425000		'RAB3B'	protein_coding	15000	14	8.47269
10488	1	52435000	52440000	RNA5SP48'	'RAB3B';'RNA5SP48'	noncoding_rRNA;protein_coding	10489	1	52440000	52445000	RNA5SP48'	'RAB3B'	protein_coding	5000	223	36.7368
10489	1	52440000	52445000	RNA5SP48'	'RAB3B'	protein_coding	10491	1	52450000	52455000		'RAB3B'	protein_coding	10000	55	26.6653
104907	3	32075000	32080000	SNORA25'	'OSBPL10';'SNORA25'	noncoding_snoRNA;protein_coding	104910	3	32090000	32095000		'OSBPL10'	protein_coding	15000	22	14.4706
10492	1	52455000	52460000	RAB3B'	'RAB3B'	protein_coding	10491	1	52450000	52455000		'RAB3B'	protein_coding	5000	97	16.2428
104935	3	32215000	32220000	snoU13'			104936	3	32220000	32225000		'CATG00000059703.1'	noncoding_lncRNA_intergenic	5000	168	36.7368
10498	1	52485000	52490000	TXNDC12'	'TXNDC12'	protein_coding	10499	1	52490000	52495000	TXNDC12'	'TXNDC12'	protein_coding	5000	101	14.3843
10501	1	52500000	52505000	RP11-91A18.4'	'CATG00000058452.1';'RP11-91A18.4';'TXNDC12'	noncoding_lncRNA_divergent;noncoding_lncRNA_noncoding_sense_intronic;protein_coding	10504	1	52515000	52520000	TXNDC12';TXNDC12-AS1'	'TXNDC12';'TXNDC12-AS1'	noncoding_antisense;protein_coding	15000	26	20.7854
10504	1	52515000	52520000	TXNDC12';TXNDC12-AS1'	'TXNDC12';'TXNDC12-AS1'	noncoding_antisense;protein_coding	10506	1	52525000	52530000		'BTF3L4'	protein_coding	10000	34	14.1933
105040	3	32740000	32745000	CNOT10'	'CNOT10'	protein_coding	105043	3	32755000	32760000	CNOT10'	'CNOT10'	protein_coding	15000	11	7.17603
105120	3	33140000	33145000	RN7SL296P'	'CATG00000059733.1';'RN7SL296P';'SUSD5'	noncoding_lncRNA_divergent;noncoding_misc_RNA;protein_coding	105123	3	33155000	33160000	CRTAP'	'CATG00000064172.1';'CRTAP';'SUSD5'	noncoding_lncRNA_divergent;protein_coding	15000	22	15.8926
105179	3	33435000	33440000	UBP1'	'FBXL2';'UBP1'	protein_coding	105178	3	33430000	33435000		'CATG00000059734.1';'FBXL2';'UBP1'	noncoding_short_ncRNA;protein_coding	5000	66	9.85159
105182	3	33450000	33455000	RNU7-110P';UBP1'	'FBXL2';'UBP1'	protein_coding	105178	3	33430000	33435000		'CATG00000059734.1';'FBXL2';'UBP1'	noncoding_short_ncRNA;protein_coding	20000	10	8.49568
105188	3	33480000	33485000	UBP1'	'CATG00000059739.1';'FBXL2';'UBP1'	noncoding_lncRNA_divergent;protein_coding	105187	3	33475000	33480000		'FBXL2';'UBP1'	protein_coding	5000	152	35.3505
105198	3	33530000	33535000	RNA5SP128'	'CLASP2';'RNA5SP128'	noncoding_rRNA;protein_coding	105200	3	33540000	33545000	CLASP2'	'CLASP2'	protein_coding	10000	34	16.6582
105259	3	33835000	33840000	PDCD6IP';RP11-10C24.1';RP11-10C24.2';RP11-10C24.3'	'RP11-10C24.1';'RP11-10C24.2';'RP11-10C24.3'	noncoding_lncRNA_divergent;noncoding_lncRNA_lincRNA	105261	3	33845000	33850000		'PDCD6IP'	protein_coding	10000	17	6.51327
10526	1	52625000	52630000	RP4-800M22.1';RP4-800M22.2'	'RP4-800M22.1';'RP4-800M22.2';'ZFYVE9'	noncoding_pseudogene;protein_coding	10527	1	52630000	52635000		'ZFYVE9'	protein_coding	5000	223	32.9991
105262	3	33850000	33855000	PDCD6IP'	'PDCD6IP'	protein_coding	105261	3	33845000	33850000		'PDCD6IP'	protein_coding	5000	54	6.73491
105266	3	33870000	33875000	PDCD6IP'	'PDCD6IP'	protein_coding	105267	3	33875000	33880000		'PDCD6IP'	protein_coding	5000	66	6.50151
105268	3	33880000	33885000	PDCD6IP'	'PDCD6IP'	protein_coding	105267	3	33875000	33880000		'PDCD6IP'	protein_coding	5000	197	36.0437
105268	3	33880000	33885000	PDCD6IP'	'PDCD6IP'	protein_coding	105270	3	33890000	33895000	PDCD6IP'	'PDCD6IP'	protein_coding	10000	17	5.58721
10529	1	52640000	52645000	PDCL3P6'	'ZFYVE9'	protein_coding	10527	1	52630000	52635000		'ZFYVE9'	protein_coding	10000	24	7.04182
105270	3	33890000	33895000	PDCD6IP'	'PDCD6IP'	protein_coding	105271	3	33895000	33900000	PDCD6IP'	'PDCD6IP'	protein_coding	5000	56	6.02447
10529	1	52640000	52645000	PDCL3P6'	'ZFYVE9'	protein_coding	10530	1	52645000	52650000	PDCL3P6'	'PDCL3P6';'ZFYVE9'	noncoding_pseudogene;protein_coding	5000	58	6.89325
10531	1	52650000	52655000	RP4-800M22.4'	'ZFYVE9'	protein_coding	10533	1	52660000	52665000		'ZFYVE9'	protein_coding	10000	29	12.6272
105332	3	34200000	34205000	AC018359.1'	'AC018359.1'	noncoding_lncRNA_intergenic	105329	3	34185000	34190000				15000	17	12.175
10545	1	52720000	52725000	ANAPC10P1'	'ZFYVE9'	protein_coding	10546	1	52725000	52730000		'ZFYVE9'	protein_coding	5000	252	36.7368
10565	1	52820000	52825000	CC2D1B';RP11-155O18.6'	'CC2D1B';'ZFYVE9'	protein_coding	10567	1	52830000	52835000	CC2D1B';PLA2G12AP1'	'CATG00000001007.1';'CC2D1B';'PLA2G12AP1'	noncoding_lncRNA_divergent;noncoding_pseudogene;protein_coding	10000	24	9.02564
10567	1	52830000	52835000	CC2D1B';PLA2G12AP1'	'CATG00000001007.1';'CC2D1B';'PLA2G12AP1'	noncoding_lncRNA_divergent;noncoding_pseudogene;protein_coding	10568	1	52835000	52840000	PLA2G12AP1'	'ORC1';'PLA2G12AP1'	noncoding_pseudogene;protein_coding	5000	88	15.6905
10574	1	52865000	52870000	ORC1';PRPF38A'	'ORC1'	protein_coding	10575	1	52870000	52875000	ORC1';PRPF38A'	'ORC1';'PRPF38A';'ZCCHC11'	protein_coding	5000	155	24.8447
105879	3	36935000	36940000	TRANK1'	'TRANK1'	protein_coding	105878	3	36930000	36935000		'TRANK1'	protein_coding	5000	57	5.98528
105880	3	36940000	36945000	TRANK1'	'TRANK1'	protein_coding	105882	3	36950000	36955000	TRANK1'	'TRANK1'	protein_coding	10000	23	8.7257
105918	3	37130000	37135000	Y_RNA'	'CATG00000064236.1';'LRRFIP2';'MLH1';'TRANK1';'Y_RNA'	noncoding_lncRNA_noncoding_sense_intronic;noncoding_misc_RNA;protein_coding	105915	3	37115000	37120000		'CATG00000064236.1';'LRRFIP2';'MLH1';'TRANK1'	noncoding_lncRNA_noncoding_sense_intronic;protein_coding	15000	31	23.4649
105927	3	37175000	37180000	UBE2D3P2'	'CATG00000064236.1';'LRRFIP2';'UBE2D3P2'	noncoding_lncRNA_noncoding_sense_intronic;noncoding_pseudogene;protein_coding	105928	3	37180000	37185000	RNU6-1301P';UBE2FP1'	'CATG00000064236.1';'LRRFIP2';'RNU6-1301P'	noncoding_lncRNA_noncoding_sense_intronic;noncoding_snRNA;protein_coding	5000	101	18.6404
105928	3	37180000	37185000	RNU6-1301P';UBE2FP1'	'CATG00000064236.1';'LRRFIP2';'RNU6-1301P'	noncoding_lncRNA_noncoding_sense_intronic;noncoding_snRNA;protein_coding	105929	3	37185000	37190000	UBE2FP1'	'CATG00000064236.1';'LRRFIP2';'UBE2FP1'	noncoding_lncRNA_noncoding_sense_intronic;noncoding_pseudogene;protein_coding	5000	213	36.7368
105935	3	37215000	37220000	LRRFIP2'	'LRRFIP2';'RP11-285J16.1'	noncoding_lncRNA_divergent;protein_coding	105936	3	37220000	37225000	LRRFIP2';RP11-285J16.1'	'RP11-285J16.1'	noncoding_lncRNA_divergent	5000	74	10.7015
105948	3	37280000	37285000	AC097359.1';GOLGA4';RP11-259K5.2'	'AC097359.1';'GOLGA4';'RP11-259K5.2'	noncoding_lncRNA_divergent;noncoding_pseudogene;protein_coding	105946	3	37270000	37275000				10000	30	17.075
105948	3	37280000	37285000	AC097359.1';GOLGA4';RP11-259K5.2'	'AC097359.1';'GOLGA4';'RP11-259K5.2'	noncoding_lncRNA_divergent;noncoding_pseudogene;protein_coding	105949	3	37285000	37290000	AC097359.1';GOLGA4'	'AC097359.1';'GOLGA4';'RP11-259K5.2'	noncoding_lncRNA_divergent;noncoding_pseudogene;protein_coding	5000	85	17.3593
105968	3	37380000	37385000	RNA5SP129'	'GOLGA4';'RNA5SP129'	noncoding_rRNA;protein_coding	105969	3	37385000	37390000		'GOLGA4'	protein_coding	5000	83	12.2522
106014	3	37610000	37615000	RNU7-73P'	'ITGA9';'RNU7-73P'	noncoding_snRNA;protein_coding	106016	3	37620000	37625000		'ITGA9'	protein_coding	10000	35	16.5932
106049	3	37785000	37790000	RPL21P135'	'ITGA9';'RPL21P135'	noncoding_pseudogene;protein_coding	106050	3	37790000	37795000	AC093415.2';RPL21P135'	'ITGA9';'RPL21P135'	noncoding_pseudogene;protein_coding	5000	54	6.00246
106064	3	37860000	37865000	AC093415.2'	'AC093415.2';'ITGA9'	noncoding_lncRNA_divergent;protein_coding	106065	3	37865000	37870000		'AC093415.2';'ITGA9'	noncoding_lncRNA_divergent;protein_coding	5000	83	12.8996
10608	1	53035000	53040000	EEF1GP7'	'EEF1GP7';'RP11-25O10.2'	noncoding_lncRNA_divergent;noncoding_pseudogene	10609	1	53040000	53045000		'EEF1GP7';'RP11-25O10.2'	noncoding_lncRNA_divergent;noncoding_pseudogene	5000	123	19.2857
106089	3	37985000	37990000	CTDSPL'	'CTDSPL'	protein_coding	106086	3	37970000	37975000		'CTDSPL'	protein_coding	15000	17	12.3492
106090	3	37990000	37995000	CTDSPL'	'CTDSPL'	protein_coding	106092	3	38000000	38005000		'CTDSPL'	protein_coding	10000	14	4.85656
106094	3	38010000	38015000	MIR26A1'	'CTDSPL';'MIR26A1'	noncoding_small_RNA;protein_coding	106092	3	38000000	38005000		'CTDSPL'	protein_coding	10000	16	6.97222
106099	3	38035000	38040000	VILL'	'CATG00000064243.1';'VILL'	noncoding_lncRNA_divergent;protein_coding	106101	3	38045000	38050000	PLCD1';VILL'	'PLCD1';'VILL'	protein_coding	10000	17	6.46135
106102	3	38050000	38055000	PLCD1'	'CATG00000059800.1';'PLCD1'	noncoding_lncRNA_divergent;protein_coding	106105	3	38065000	38070000	PLCD1'	'PLCD1'	protein_coding	15000	14	10.0284
106122	3	38150000	38155000	DLEC1'	'ACAA1';'DLEC1'	protein_coding	106125	3	38165000	38170000	ACAA1';Y_RNA'	'ACAA1';'DLEC1';'Y_RNA'	noncoding_sense_overlap_RNA;protein_coding	15000	9	4.92387
106124	3	38160000	38165000	ACAA1'	'ACAA1';'DLEC1'	protein_coding	106125	3	38165000	38170000	ACAA1';Y_RNA'	'ACAA1';'DLEC1';'Y_RNA'	noncoding_sense_overlap_RNA;protein_coding	5000	55	9.69877
106126	3	38170000	38175000	ACAA1'	'ACAA1'	protein_coding	106127	3	38175000	38180000	ACAA1';MYD88'	'ACAA1';'MYD88'	protein_coding	5000	86	15.7945
106127	3	38175000	38180000	ACAA1';MYD88'	'ACAA1';'MYD88'	protein_coding	106133	3	38205000	38210000	OXSR1'	'CATG00000059804.1';'CATG00000064254.1';'OXSR1'	noncoding_lncRNA_intergenic;protein_coding;uncertain_coding	30000	5	5.23408
106128	3	38180000	38185000	MYD88'	'ACAA1';'CATG00000064250.1';'MYD88'	noncoding_short_ncRNA;protein_coding	106130	3	38190000	38195000		'CATG00000064252.1'	noncoding_lncRNA_intergenic	10000	22	10.7634
106173	3	38405000	38410000	XYLB'	'CATG00000059804.1';'XYLB'	noncoding_lncRNA_intergenic;protein_coding	106171	3	38395000	38400000		'CATG00000059804.1';'XYLB'	noncoding_lncRNA_intergenic;protein_coding	10000	18	5.71458
106173	3	38405000	38410000	XYLB'	'CATG00000059804.1';'XYLB'	noncoding_lncRNA_intergenic;protein_coding	106174	3	38410000	38415000		'CATG00000059804.1';'XYLB'	noncoding_lncRNA_intergenic;protein_coding	5000	65	8.61448
106190	3	38490000	38495000	ACVR2B';ACVR2B-AS1'	'ACVR2B-AS1'	noncoding_lncRNA_intergenic	106191	3	38495000	38500000	ACVR2B';ACVR2B-AS1'	'ACVR2B';'ACVR2B-AS1'	noncoding_lncRNA_intergenic;protein_coding	5000	64	9.91293
106191	3	38495000	38500000	ACVR2B';ACVR2B-AS1'	'ACVR2B';'ACVR2B-AS1'	noncoding_lncRNA_intergenic;protein_coding	106192	3	38500000	38505000		'ACVR2B'	protein_coding	5000	81	15.7844
106205	3	38565000	38570000	RPL18AP7'	'EXOG';'RPL18AP7'	noncoding_pseudogene;protein_coding	106204	3	38560000	38565000		'EXOG'	protein_coding	5000	138	21.8172
106319	3	39135000	39140000	GORASP1'	'GORASP1';'WDR48'	protein_coding	106321	3	39145000	39150000	GORASP1';TTC21A'	'GORASP1';'TTC21A'	protein_coding	10000	33	15.4526
106338	3	39230000	39235000	XIRP1'	'XIRP1'	protein_coding	106336	3	39220000	39225000		'TTC21A';'XIRP1'	protein_coding	10000	15	4.92219
106368	3	39380000	39385000	RP11-241K18.2'	'CX3CR1';'RP11-241K18.2'	noncoding_pseudogene;protein_coding	106369	3	39385000	39390000		'CATG00000064294.1';'CX3CR1'	noncoding_lncRNA_intergenic;protein_coding	5000	123	18.3328
106372	3	39400000	39405000	EEF1A1P24'	'CX3CR1';'EEF1A1P24'	noncoding_pseudogene;protein_coding	106373	3	39405000	39410000		'CX3CR1'	protein_coding	5000	146	28.707
106394	3	39510000	39515000	MOBP'	'MOBP'	protein_coding	106403	3	39555000	39560000		'MOBP'	protein_coding	45000	7	8.19247
126924	3	142160000	142165000	AC109992.1'	'AC109992.1';'XRN1'	noncoding_pseudogene;protein_coding	106432	3	39700000	39705000				102460000	15	23.9357
106461	3	39845000	39850000	MYRIP'	'CATG00000059842.1'	noncoding_lncRNA_intergenic	106460	3	39840000	39845000		'CATG00000059842.1'	noncoding_lncRNA_intergenic	5000	81	12.0696
10648	1	53235000	53240000	RP11-159C21.4'	'RP11-159C21.4';'ZYG11B'	noncoding_pseudogene;protein_coding	10647	1	53230000	53235000		'ZYG11B'	protein_coding	5000	493	36.7368
106494	3	40010000	40015000	RNU4-56P'	'CATG00000064346.1';'MYRIP';'RNU4-56P'	noncoding_lncRNA_noncoding_antisense;noncoding_snRNA;protein_coding	106495	3	40015000	40020000		'CATG00000064346.1';'MYRIP'	noncoding_lncRNA_noncoding_antisense;protein_coding	5000	103	17.1862
106520	3	40140000	40145000	MYRIP'	'MYRIP'	protein_coding	106519	3	40135000	40140000		'MYRIP'	protein_coding	5000	100	19.3547
106578	3	40430000	40435000	ENTPD3'	'ENTPD3';'ENTPD3-AS1'	noncoding_lncRNA_intergenic;protein_coding	106579	3	40435000	40440000		'ENTPD3';'ENTPD3-AS1'	noncoding_lncRNA_intergenic;protein_coding	5000	49	4.79245
106593	3	40505000	40510000	RP11-391M1.4'	'RP11-391M1.4';'RPL14'	noncoding_lncRNA_lincRNA;protein_coding	106594	3	40510000	40515000		'RP11-391M1.4'	noncoding_lncRNA_lincRNA	5000	79	16.928
106606	3	40570000	40575000	ZNF621'	'RP11-761N21.2';'ZNF621'	noncoding_pseudogene;protein_coding	106604	3	40560000	40565000		'CATG00000064358.1';'ZNF620'	noncoding_lncRNA_divergent;protein_coding	10000	16	6.17312
10670	1	53345000	53350000	RP4-631H13.2'	'RP4-631H13.2';'ZYG11A'	noncoding_antisense;protein_coding	10668	1	53335000	53340000		'ZYG11A'	protein_coding	10000	42	21.1305
10680	1	53395000	53400000	MIR1273F';MIR5095'	'SCP2'	protein_coding	10682	1	53405000	53410000	MIR1273G';RP4-631H13.5';SCP2'	'MIR1273G';'RP4-631H13.5';'SCP2'	noncoding_miRNA;noncoding_pseudogene;protein_coding	10000	37	17.4153
10682	1	53405000	53410000	MIR1273G';RP4-631H13.5';SCP2'	'MIR1273G';'RP4-631H13.5';'SCP2'	noncoding_miRNA;noncoding_pseudogene;protein_coding	10683	1	53410000	53415000	RP4-631H13.5'	'SCP2'	protein_coding	5000	59	5.58383
106837	3	41725000	41730000	SCARNA21'	'CATG00000059872.1';'SCARNA21';'ULK4'	noncoding_lncRNA_noncoding_antisense;noncoding_snoRNA;protein_coding	106838	3	41730000	41735000	SCARNA21'	'CATG00000059872.1';'ULK4'	noncoding_lncRNA_noncoding_antisense;protein_coding	5000	50	4.79656
106871	3	41895000	41900000	ATP6V0E1P2';ULK4'	'ULK4'	protein_coding	106870	3	41890000	41895000		'ULK4'	protein_coding	5000	78	9.98697
106891	3	41995000	42000000	RPL36P20';ULK4'	'RPL36P20';'ULK4'	noncoding_pseudogene;protein_coding	106892	3	42000000	42005000	ULK4'	'CATG00000059874.1';'ULK4'	noncoding_lncRNA_divergent;protein_coding	5000	42	5.61441
106910	3	42090000	42095000	RP11-193I22.2'	'RP11-193I22.2';'TRAK1'	noncoding_pseudogene;protein_coding	106915	3	42115000	42120000		'TRAK1'	protein_coding	25000	8	7.77999
106917	3	42125000	42130000	TRAK1'	'TRAK1'	protein_coding	106915	3	42115000	42120000		'TRAK1'	protein_coding	10000	19	7.7893
106918	3	42130000	42135000	TRAK1'	'TRAK1'	protein_coding	106915	3	42115000	42120000		'TRAK1'	protein_coding	15000	10	5.97675
106929	3	42185000	42190000	TPMTP2';TRAK1'	'TPMTP2';'TRAK1'	noncoding_pseudogene;protein_coding	106926	3	42170000	42175000		'TRAK1'	protein_coding	15000	32	28.2665
106929	3	42185000	42190000	TPMTP2';TRAK1'	'TPMTP2';'TRAK1'	noncoding_pseudogene;protein_coding	106931	3	42195000	42200000		'TRAK1'	protein_coding	10000	39	21.9953
106932	3	42200000	42205000	TRAK1'	'TRAK1'	protein_coding	106931	3	42195000	42200000		'TRAK1'	protein_coding	5000	122	22.2183
106938	3	42230000	42235000	TRAK1'	'TRAK1'	protein_coding	106939	3	42235000	42240000	TRAK1'	'TRAK1'	protein_coding	5000	65	6.74127
106981	3	42445000	42450000	LYZL4'	'LYZL4'	protein_coding	106984	3	42460000	42465000	AC092048.1'	'AC092048.1';'LYZL4'	noncoding_miRNA;protein_coding	15000	17	13.4378
106984	3	42460000	42465000	AC092048.1'	'AC092048.1';'LYZL4'	noncoding_miRNA;protein_coding	106985	3	42465000	42470000		'LYZL4'	protein_coding	5000	163	36.7368
107012	3	42600000	42605000	SEC22C'	'SEC22C'	protein_coding	107010	3	42590000	42595000		'SEC22C'	protein_coding	10000	14	6.06547
107016	3	42620000	42625000	SEC22C';SS18L2'	'SEC22C';'SS18L2'	protein_coding	107014	3	42610000	42615000		'SEC22C'	protein_coding	10000	17	4.86482
107054	3	42810000	42815000	CCDC13';RP11-70C1.1'	'CCDC13';'HIGD1A';'RP11-70C1.1'	noncoding_lncRNA_divergent;protein_coding	107053	3	42805000	42810000		'CCDC13';'HIGD1A'	protein_coding	5000	94	14.9929
107054	3	42810000	42815000	CCDC13';RP11-70C1.1'	'CCDC13';'HIGD1A';'RP11-70C1.1'	noncoding_lncRNA_divergent;protein_coding	107056	3	42820000	42825000		'HIGD1A'	protein_coding	10000	20	8.24957
107061	3	42845000	42850000	ACKR2';HIGD1A';KRBOX1';RP11-141M3.5'	'ACKR2';'HIGD1A';'RP11-141M3.5';'RP11-70C1.3'	noncoding_lncRNA_noncoding_antisense;noncoding_lncRNA_noncoding_sense_intronic;protein_coding	107063	3	42855000	42860000		'ACKR2';'KRBOX1';'RP11-141M3.5';'RP11-70C1.3'	noncoding_lncRNA_noncoding_antisense;noncoding_lncRNA_noncoding_sense_intronic;protein_coding	10000	28	14.3491
107068	3	42880000	42885000	ACKR2'	'ACKR2';'KRBOX1';'RP11-141M3.5';'RP11-70C1.3'	noncoding_lncRNA_noncoding_antisense;noncoding_lncRNA_noncoding_sense_intronic;protein_coding	107067	3	42875000	42880000		'ACKR2';'KRBOX1';'RP11-141M3.5';'RP11-70C1.3'	noncoding_lncRNA_noncoding_antisense;noncoding_lncRNA_noncoding_sense_intronic;protein_coding	5000	91	13.4338
10716	1	53575000	53580000	RP11-334A14.8'	'SLC1A7'	protein_coding	10715	1	53570000	53575000		'SLC1A7'	protein_coding	5000	139	26.3732
107160	3	43340000	43345000	SNRK'	'SNRK'	protein_coding	107161	3	43345000	43350000	SNRK'	'SNRK'	protein_coding	5000	80	10.8445
10733	1	53660000	53665000	CPT2'	'CATG00000058735.1';'CPT2'	noncoding_lncRNA_divergent;protein_coding	10734	1	53665000	53670000		'CPT2'	protein_coding	5000	104	15.5137
10736	1	53675000	53680000	RP5-1024G6.2'	'C1orf123';'CPT2';'RP5-1024G6.2'	noncoding_antisense;protein_coding	10737	1	53680000	53685000	C1orf123';RP5-1024G6.2'	'C1orf123'	protein_coding	5000	48	4.8554
107367	3	44375000	44380000	RP11-424N24.2';TCAIM'	'RP11-424N24.2';'TCAIM'	noncoding_lncRNA_divergent;protein_coding	107365	3	44365000	44370000		'RP11-424N24.2';'TOPAZ1'	noncoding_lncRNA_divergent;protein_coding	10000	20	8.85291
10740	1	53695000	53700000	MAGOH'	'MAGOH'	protein_coding	10741	1	53700000	53705000	MAGOH';RP5-1024G6.5'	'MAGOH';'RP5-1024G6.5'	noncoding_lncRNA_divergent;protein_coding	5000	144	23.7687
107480	3	44940000	44945000	RP11-272D20.2';TGM4'	'RP11-272D20.2';'TGM4'	noncoding_antisense;protein_coding	107477	3	44925000	44930000		'TGM4'	protein_coding	15000	16	10.1131
107480	3	44940000	44945000	RP11-272D20.2';TGM4'	'RP11-272D20.2';'TGM4'	noncoding_antisense;protein_coding	107484	3	44960000	44965000	ZDHHC3'	'TGM4';'ZDHHC3'	protein_coding	20000	7	4.63314
107483	3	44955000	44960000	ZDHHC3'	'TGM4';'ZDHHC3'	protein_coding	107484	3	44960000	44965000	ZDHHC3'	'TGM4';'ZDHHC3'	protein_coding	5000	65	9.46929
107486	3	44970000	44975000	ZDHHC3'	'ZDHHC3'	protein_coding	107487	3	44975000	44980000	RPL12P44';ZDHHC3'	'RPL12P44';'ZDHHC3'	noncoding_pseudogene;protein_coding	5000	141	33.7924
107492	3	45000000	45005000	ZDHHC3'	'ZDHHC3'	protein_coding	107493	3	45005000	45010000		'ZDHHC3'	protein_coding	5000	57	5.18604
107495	3	45015000	45020000	EXOSC7';ZDHHC3'	'EXOSC7';'ZDHHC3'	protein_coding	107497	3	45025000	45030000		'EXOSC7'	protein_coding	10000	23	11.8018
107495	3	45015000	45020000	EXOSC7';ZDHHC3'	'EXOSC7';'ZDHHC3'	protein_coding	107498	3	45030000	45035000		'EXOSC7'	protein_coding	15000	11	5.94899
107502	3	45050000	45055000	EXOSC7'	'CLEC3B';'EXOSC7'	protein_coding	107503	3	45055000	45060000		'CATG00000064456.1';'CLEC3B';'EXOSC7'	noncoding_lncRNA_noncoding_antisense;protein_coding	5000	150	27.3839
107527	3	45175000	45180000	CDCP1'	'CDCP1'	protein_coding	107529	3	45185000	45190000	CDCP1'	'CATG00000059961.1';'CDCP1'	noncoding_lncRNA_divergent;protein_coding	10000	22	8.79967
107527	3	45175000	45180000	CDCP1'	'CDCP1'	protein_coding	107534	3	45210000	45215000		'CATG00000059964.1'	noncoding_lncRNA_intergenic	35000	5	4.74798
10754	1	53765000	53770000	RP4-784A16.4'	'LRP8'	protein_coding	10753	1	53760000	53765000		'LRP8'	protein_coding	5000	189	36.7368
107578	3	45430000	45435000	LARS2'	'LARS2'	protein_coding	107581	3	45445000	45450000		'LARS2'	protein_coding	15000	17	11.812
107608	3	45580000	45585000	LARS2'	'CATG00000064473.1';'LARS2'	noncoding_lncRNA_noncoding_antisense;protein_coding	107607	3	45575000	45580000		'CATG00000064473.1';'LARS2'	noncoding_lncRNA_noncoding_antisense;protein_coding	5000	57	6.97216
107608	3	45580000	45585000	LARS2'	'CATG00000064473.1';'LARS2'	noncoding_lncRNA_noncoding_antisense;protein_coding	107610	3	45590000	45595000		'CATG00000064473.1';'LARS2'	noncoding_lncRNA_noncoding_antisense;protein_coding	10000	13	4.85604
107611	3	45595000	45600000	LIMD1'	'CATG00000064473.1';'LARS2';'LIMD1'	noncoding_lncRNA_noncoding_antisense;protein_coding	107610	3	45590000	45595000		'CATG00000064473.1';'LARS2'	noncoding_lncRNA_noncoding_antisense;protein_coding	5000	57	9.18592
107633	3	45705000	45710000	LIMD1'	'LIMD1'	protein_coding	107632	3	45700000	45705000		'LIMD1'	protein_coding	5000	131	28.6874
107637	3	45725000	45730000	LIMD1-AS1';SACM1L'	'LIMD1';'LIMD1-AS1';'SACM1L'	noncoding_lncRNA_divergent;protein_coding	107635	3	45715000	45720000		'LIMD1';'LIMD1-AS1'	noncoding_lncRNA_divergent;protein_coding	10000	31	18.0966
107654	3	45810000	45815000	SLC6A20'	'SLC6A20'	protein_coding	107656	3	45820000	45825000		'SLC6A20'	protein_coding	10000	31	13.6287
107692	3	46000000	46005000	FYCO1'	'FYCO1'	protein_coding	107694	3	46010000	46015000		'FYCO1'	protein_coding	10000	34	15.2253
107741	3	46245000	46250000	CCR1'	'CATG00000059987.1';'CATG00000060000.1';'CCR1';'CCR3'	noncoding_lncRNA_noncoding_sense_intronic;protein_coding	107740	3	46240000	46245000		'CATG00000059987.1';'CCR1';'CCR3'	protein_coding	5000	61	7.13281
107770	3	46390000	46395000	CCR2'			107771	3	46395000	46400000	CCR2'	'CCR2'	protein_coding	5000	95	13.4632
107953	3	47305000	47310000	KIF9'	'KIF9'	protein_coding	107957	3	47325000	47330000	KIF9';KLHL18'	'KIF9';'KLHL18'	protein_coding	20000	7	4.92149
107975	3	47415000	47420000	RP11-708J19.1'	'RP11-708J19.1'	noncoding_lncRNA_divergent	107976	3	47420000	47425000	PTPN23';RP11-708J19.1'	'PTPN23';'RP11-708J19.1'	noncoding_lncRNA_divergent;protein_coding	5000	44	4.70942
107981	3	47445000	47450000	PTPN23'	'PTPN23'	protein_coding	107978	3	47430000	47435000		'PTPN23'	protein_coding	15000	10	6.05675
107988	3	47480000	47485000	SCAP'	'SCAP'	protein_coding	107987	3	47475000	47480000		'SCAP'	protein_coding	5000	56	7.86455
107989	3	47485000	47490000	SCAP'	'SCAP'	protein_coding	107991	3	47495000	47500000		'SCAP'	protein_coding	10000	25	12.5954
107993	3	47505000	47510000	snoU13'	'SCAP';'snoU13'	noncoding_snoRNA;protein_coding	107995	3	47515000	47520000	SCAP'	'CATG00000060027.1';'SCAP'	noncoding_lncRNA_divergent;protein_coding	10000	50	27.7602
108032	3	47700000	47705000	RP11-395P16.1'	'SMARCC1'	protein_coding	108031	3	47695000	47700000		'SMARCC1'	protein_coding	5000	76	11.0832
108060	3	47840000	47845000	DHX30'	'CATG00000064548.1';'DHX30'	noncoding_lncRNA_divergent;protein_coding	108064	3	47860000	47865000		'DHX30'	protein_coding	20000	6	5.51983
108065	3	47865000	47870000	DHX30'	'DHX30'	protein_coding	108064	3	47860000	47865000		'DHX30'	protein_coding	5000	73	16.2663
108092	3	48000000	48005000	VPS26BP1'	'MAP4';'VPS26BP1'	noncoding_pseudogene;protein_coding	108093	3	48005000	48010000		'MAP4'	protein_coding	5000	99	17.0165
108100	3	48040000	48045000	MAP4'	'MAP4'	protein_coding	108098	3	48030000	48035000		'MAP4'	protein_coding	10000	40	21.0444
108100	3	48040000	48045000	MAP4'	'MAP4'	protein_coding	108103	3	48055000	48060000	MAP4'	'MAP4'	protein_coding	15000	10	5.17892
108107	3	48075000	48080000	RP11-1029M24.4'	'CATG00000064553.1';'MAP4'	noncoding_lncRNA_noncoding_sense_intronic;protein_coding	108106	3	48070000	48075000		'CATG00000064553.1';'MAP4'	noncoding_lncRNA_noncoding_sense_intronic;protein_coding	5000	50	5.72976
108136	3	48220000	48225000	NDUFB1P1';RNU7-128P'	'CDC25A';'NDUFB1P1';'RNU7-128P'	noncoding_pseudogene;noncoding_snRNA;protein_coding	108138	3	48230000	48235000	CDC25A'	'CATG00000060043.1'	noncoding_lncRNA_divergent	10000	15	4.84372
108189	3	48485000	48490000	ATRIP';RP11-24C3.2'	'ATRIP';'RP11-24C3.2';'TMA7'	noncoding_lncRNA_divergent;protein_coding	108190	3	48490000	48495000	ATRIP'	'ATRIP'	protein_coding	5000	184	36.7368
108209	3	48585000	48590000	PFKFB4'	'PFKFB4'	protein_coding	108208	3	48580000	48585000		'PFKFB4'	protein_coding	5000	127	25.0015
108210	3	48590000	48595000	PFKFB4'	'PFKFB4'	protein_coding	108211	3	48595000	48600000	PFKFB4'	'CATG00000060059.1';'PFKFB4';'UCN2'	noncoding_lncRNA_noncoding_antisense;protein_coding	5000	59	10.4934
108225	3	48665000	48670000	SLC26A6'	'SLC26A6'	protein_coding	108226	3	48670000	48675000	SLC26A6'	'CATG00000060064.1';'CELSR3';'SLC26A6'	noncoding_lncRNA_divergent;protein_coding	5000	107	18.3905
108242	3	48750000	48755000	IP6K2'	'IP6K2'	protein_coding	108243	3	48755000	48760000	IP6K2'	'IP6K2'	protein_coding	5000	94	15.2584
108279	3	48935000	48940000	SLC25A20'	'SLC25A20'	protein_coding	108280	3	48940000	48945000				5000	46	5.52583
108283	3	48955000	48960000	ARIH2';ARIH2OS'	'ARIH2';'ARIH2OS'	protein_coding	108280	3	48940000	48945000				15000	9	5.67351
108283	3	48955000	48960000	ARIH2';ARIH2OS'	'ARIH2';'ARIH2OS'	protein_coding	108284	3	48960000	48965000	ARIH2'	'ARIH2'	protein_coding	5000	140	36.7368
108293	3	49005000	49010000	ARIH2'	'ARIH2'	protein_coding	108294	3	49010000	49015000	ARIH2'	'ARIH2';'CATG00000060069.1'	noncoding_lncRNA_noncoding_sense_intronic;protein_coding	5000	54	9.51202
108296	3	49020000	49025000	ARIH2';RP13-131K19.1';RP13-131K19.7'	'ARIH2';'RP13-131K19.1';'RP13-131K19.2';'RP13-131K19.7'	noncoding_antisense;noncoding_lncRNA_divergent;noncoding_lncRNA_lincRNA;protein_coding	108302	3	49050000	49055000	DALRD3';WDR6'	'DALRD3';'WDR6'	protein_coding	30000	5	4.9608
108298	3	49030000	49035000	P4HTM'	'P4HTM'	protein_coding	108302	3	49050000	49055000	DALRD3';WDR6'	'DALRD3';'WDR6'	protein_coding	20000	14	13.5056
108316	3	49120000	49125000	RN7SL182P'	'QRICH1';'RN7SL182P'	noncoding_misc_RNA;protein_coding	108317	3	49125000	49130000	QRICH1'	'QRICH1'	protein_coding	5000	73	10.4067
108323	3	49155000	49160000	LAMB2';USP19'	'CATG00000060073.1';'LAMB2';'USP19'	noncoding_lncRNA_divergent;protein_coding	108325	3	49165000	49170000	LAMB2'	'LAMB2'	protein_coding	10000	13	5.16652
108325	3	49165000	49170000	LAMB2'	'LAMB2'	protein_coding	108326	3	49170000	49175000	LAMB2'	'CATG00000060074.1';'LAMB2'	protein_coding	5000	62	9.29956
108331	3	49195000	49200000	RP11-694I15.7'	'CCDC71';'RP11-694I15.7'	noncoding_pseudogene;protein_coding	108332	3	49200000	49205000	CCDC71'	'CCDC71';'KLHDC8B'	protein_coding	5000	99	20.578
108344	3	49260000	49265000	CCDC36'	'CCDC36'	protein_coding	108343	3	49255000	49260000		'CCDC36'	protein_coding	5000	81	13.8597
108353	3	49305000	49310000	Y_RNA'	'C3orf62';'CCDC36';'Y_RNA'	noncoding_misc_RNA;protein_coding	108354	3	49310000	49315000	C3orf62';MIR4271'	'C3orf62';'MIR4271';'USP4'	noncoding_miRNA;protein_coding	5000	81	11.5992
108362	3	49350000	49355000	USP4'	'USP4'	protein_coding	108367	3	49375000	49380000	USP4'	'CATG00000060079.1';'USP4'	noncoding_lncRNA_intergenic;protein_coding	25000	9	10.533
108381	3	49445000	49450000	RHOA';TCTA'	'RHOA';'TCTA'	protein_coding	108380	3	49440000	49445000		'CATG00000064591.1';'RHOA'	noncoding_lncRNA_noncoding_sense_intronic;protein_coding	5000	57	6.29157
108401	3	49545000	49550000	DAG1'	'DAG1'	protein_coding	108402	3	49550000	49555000		'DAG1'	protein_coding	5000	80	14.4177
108428	3	49680000	49685000	BSN';BSN-AS1'	'BSN'	protein_coding	108433	3	49705000	49710000		'BSN';'CATG00000064602.1'	protein_coding	25000	5	4.86775
108442	3	49750000	49755000	AMIGO3';RNF123'	'AMIGO3';'GMPPB';'RNF123'	protein_coding	108444	3	49760000	49765000	AMIGO3';GMPPB';IP6K1'	'AMIGO3';'CATG00000060103.1';'GMPPB';'IP6K1';'RNF123'	noncoding_lncRNA_divergent;protein_coding	10000	16	6.07082
108495	3	50015000	50020000	RBM6'	'RBM6'	protein_coding	108498	3	50030000	50035000		'RBM6'	protein_coding	15000	20	17.2743
108541	3	50245000	50250000	SLC38A3'	'SLC38A3'	noncoding_lncRNA_intergenic	108546	3	50270000	50275000	GNAI2'	'GNAI2'	protein_coding	25000	8	9.33505
108568	3	50380000	50385000	ZMYND10'	'CYB561D2';'NPRL2';'XXcos-LUCA11.5';'ZMYND10';'ZMYND10-AS1'	noncoding_lncRNA_divergent;protein_coding	108569	3	50385000	50390000	CYB561D2';NPRL2';XXcos-LUCA11.5'	'CYB561D2';'NPRL2';'XXcos-LUCA11.5';'ZMYND10-AS1'	noncoding_lncRNA_divergent;protein_coding	5000	83	18.3966
10859	1	54290000	54295000	AL049745.1'	'AL049745.1';'NDC1'	noncoding_miRNA;protein_coding	10858	1	54285000	54290000		'NDC1'	protein_coding	5000	62	7.46782
108611	3	50595000	50600000	C3orf18'	'C3orf18'	protein_coding	108613	3	50605000	50610000	C3orf18';HEMK1'	'C3orf18';'HEMK1'	protein_coding	10000	15	5.23883
108611	3	50595000	50600000	C3orf18'	'C3orf18'	protein_coding	108622	3	50650000	50655000	CISH';MAPKAPK3'	'CATG00000064633.1';'MAPKAPK3'	noncoding_lncRNA_divergent;protein_coding	55000	5	6.56737
108620	3	50640000	50645000	CISH'	'CISH'	protein_coding	108621	3	50645000	50650000	CISH';MAPKAPK3'	'CISH';'MAPKAPK3'	protein_coding	5000	52	5.99522
108621	3	50645000	50650000	CISH';MAPKAPK3'	'CISH';'MAPKAPK3'	protein_coding	108622	3	50650000	50655000	CISH';MAPKAPK3'	'CATG00000064633.1';'MAPKAPK3'	noncoding_lncRNA_divergent;protein_coding	5000	83	12.2493
108622	3	50650000	50655000	CISH';MAPKAPK3'	'CATG00000064633.1';'MAPKAPK3'	noncoding_lncRNA_divergent;protein_coding	108624	3	50660000	50665000		'MAPKAPK3'	protein_coding	10000	18	5.58413
108633	3	50705000	50710000	RP11-804H8.6'	'RP11-804H8.6'	noncoding_lncRNA_intergenic	108634	3	50710000	50715000	DOCK3';MIR4787'	'DOCK3';'MIR4787'	noncoding_small_RNA;protein_coding	5000	69	8.58694
108636	3	50720000	50725000	RP11-804H8.5'	'DOCK3';'RP11-804H8.5'	noncoding_pseudogene;protein_coding	108637	3	50725000	50730000		'DOCK3'	protein_coding	5000	47	5.46991
10872	1	54355000	54360000	DIO1';YIPF1'	'DIO1';'YIPF1'	protein_coding	10874	1	54365000	54370000		'DIO1';'HSPB11'	protein_coding	10000	56	30.6165
10882	1	54405000	54410000	HSPB11'	'HSPB11'	protein_coding	10878	1	54385000	54390000		'HSPB11'	protein_coding	20000	11	9.99814
108806	3	51570000	51575000	RAD54L2'	'CATG00000064636.1';'RAD54L2'	noncoding_lncRNA_divergent;protein_coding	108808	3	51580000	51585000		'RAD54L2'	protein_coding	10000	16	6.16336
108821	3	51645000	51650000	RNU6ATAC29P'	'RAD54L2';'RNU6ATAC29P'	noncoding_snRNA;protein_coding	108822	3	51650000	51655000		'RAD54L2'	protein_coding	5000	169	27.7838
108824	3	51660000	51665000	RAD54L2'	'RAD54L2'	protein_coding	108822	3	51650000	51655000		'RAD54L2'	protein_coding	10000	21	8.66363
108854	3	51810000	51815000	IQCF6'	'IQCF6'	protein_coding	108853	3	51805000	51810000		'CATG00000060154.1';'IQCF6'	protein_coding;uncertain_coding	5000	98	15.4996
10888	1	54435000	54440000	HNRNPA3P12'	'LRRC42'	protein_coding	10887	1	54430000	54435000		'LRRC42'	protein_coding	5000	100	15.864
108874	3	51910000	51915000	IQCF5'			108884	3	51960000	51965000		'RRP9'	protein_coding	50000	9	14.2643
108886	3	51970000	51975000	RRP9'	'RRP9'	protein_coding	108884	3	51960000	51965000		'RRP9'	protein_coding	10000	13	4.82241
108886	3	51970000	51975000	RRP9'	'RRP9'	protein_coding	108887	3	51975000	51980000	PARP3';RRP9'	'PARP3';'RRP9'	protein_coding	5000	77	17.5465
108897	3	52025000	52030000	RPL29'	'ACY1';'CATG00000060161.1';'RPL29'	noncoding_lncRNA_noncoding_antisense;protein_coding	108898	3	52030000	52035000	RPL29'	'CATG00000060161.1';'RPL29'	noncoding_lncRNA_noncoding_antisense;protein_coding	5000	178	36.7368
108944	3	52260000	52265000	TLR9';TWF2'	'ALAS1';'TLR9';'TWF2'	protein_coding	108942	3	52250000	52255000		'ALAS1';'TLR9'	protein_coding	10000	12	4.62377
108947	3	52275000	52280000	PPM1M'	'PPM1M';'RP5-1157M23.2';'TWF2'	noncoding_lncRNA_divergent;protein_coding	108942	3	52250000	52255000		'ALAS1';'TLR9'	protein_coding	25000	5	4.86137
108951	3	52295000	52300000	WDR82'	'WDR82'	protein_coding	108952	3	52300000	52305000	MIRLET7G';WDR82'	'MIRLET7G';'WDR82'	noncoding_small_RNA;protein_coding	5000	45	4.98372
108954	3	52310000	52315000	WDR82'	'GLYCTK';'WDR82'	protein_coding	108956	3	52320000	52325000	GLYCTK';WDR82'	'GLYCTK';'GLYCTK-AS1';'WDR82'	noncoding_lncRNA_noncoding_antisense;protein_coding	10000	13	4.78962
108982	3	52450000	52455000	PHF7'	'PHF7'	protein_coding	108983	3	52455000	52460000	PHF7'	'PHF7'	protein_coding	5000	102	19.535
108982	3	52450000	52455000	PHF7'	'PHF7'	protein_coding	108986	3	52470000	52475000		'SEMA3G'	protein_coding	20000	7	5.56368
108988	3	52480000	52485000	TNNC1'	'TNNC1'	protein_coding	108989	3	52485000	52490000	NISCH';TNNC1'	'NISCH';'TNNC1'	protein_coding	5000	52	7.90604
109011	3	52595000	52600000	RNU6ATAC16P'	'PBRM1';'SMIM4'	protein_coding	109012	3	52600000	52605000		'PBRM1';'SMIM4'	protein_coding	5000	80	10.5359
10902	1	54505000	54510000	TMEM59'	'TMEM59'	protein_coding	10904	1	54515000	54520000	MIR4781';TCEANC2';TMEM59'	'MIR4781';'TCEANC2';'TMEM59'	noncoding_small_RNA;protein_coding	10000	23	10.3106
109034	3	52710000	52715000	GNL3';PBRM1'	'PBRM1'	protein_coding	109035	3	52715000	52720000	GNL3';PBRM1'	'GNL3';'PBRM1'	protein_coding	5000	61	7.70883
109037	3	52725000	52730000	GLT8D1';GNL3';SNORD19';SNORD19B';SNORD69'	'GLT8D1';'GNL3';'SNORD19';'SNORD69'	noncoding_small_RNA;protein_coding	109040	3	52740000	52745000	GLT8D1';SPCS1'	'GLT8D1';'NEK4';'SPCS1'	protein_coding	15000	11	7.25186
109062	3	52850000	52855000	ITIH4'	'ITIH4';'RP5-966M1.6';'TMEM110-MUSTN1'	protein_coding	109064	3	52860000	52865000	ITIH4'	'ITIH4';'MUSTN1';'RP5-966M1.6';'TMEM110-MUSTN1'	protein_coding	10000	16	5.28873
10911	1	54550000	54555000	RP4-758J24.4'	'TCEANC2'	protein_coding	10910	1	54545000	54550000		'TCEANC2'	protein_coding	5000	124	20.2599
10911	1	54550000	54555000	RP4-758J24.4'	'TCEANC2'	protein_coding	10912	1	54555000	54560000	RP4-758J24.4'	'RP4-758J24.4';'TCEANC2'	noncoding_pseudogene;protein_coding	5000	112	14.5116
109118	3	53130000	53135000	RP11-894J14.5'	'RFT1';'RP11-894J14.5'	protein_coding	109115	3	53115000	53120000		'CATG00000060194.1';'RFT1';'RP11-894J14.5'	protein_coding	15000	10	5.93513
109129	3	53185000	53190000	PRKCD'	'CATG00000064662.1';'PRKCD'	noncoding_lncRNA_divergent;protein_coding	109128	3	53180000	53185000		'PRKCD'	protein_coding	5000	206	36.7368
109144	3	53260000	53265000	TKT'	'CATG00000060201.1';'CATG00000060205.1';'TKT'	noncoding_lncRNA_divergent;protein_coding;uncertain_coding	109145	3	53265000	53270000	TKT'	'CATG00000060206.1';'TKT'	noncoding_lncRNA_divergent;protein_coding	5000	127	24.5956
109155	3	53315000	53320000	snoU13'	'CATG00000060207.1';'DCP1A';'snoU13'	noncoding_lncRNA_noncoding_antisense;noncoding_snoRNA;protein_coding	109153	3	53305000	53310000		'CATG00000060207.1'	noncoding_lncRNA_noncoding_antisense	10000	46	24.1952
109197	3	53525000	53530000	CACNA1D'	'CACNA1D'	protein_coding	109196	3	53520000	53525000		'CACNA1D'	protein_coding	5000	48	5.66082
109204	3	53560000	53565000	SNORD63'	'CACNA1D';'SNORD63'	noncoding_snoRNA;protein_coding	109203	3	53555000	53560000		'CACNA1D'	protein_coding	5000	47	5.22078
109218	3	53630000	53635000	AC024149.1'	'AC024149.1';'CACNA1D'	noncoding_miRNA;protein_coding	109217	3	53625000	53630000		'CACNA1D'	protein_coding	5000	70	8.14955
109257	3	53825000	53830000	CACNA1D'	'CACNA1D'	protein_coding	109258	3	53830000	53835000	CACNA1D';RP11-884K10.6'	'CACNA1D';'RP11-884K10.6'	noncoding_antisense;protein_coding	5000	66	8.06767
109268	3	53880000	53885000	CHDH';IL17RB'	'CHDH';'IL17RB'	protein_coding	109266	3	53870000	53875000		'CHDH'	protein_coding	10000	18	7.61681
109270	3	53890000	53895000	RP11-884K10.7'	'ACTR8';'IL17RB';'RP11-884K10.7'	noncoding_antisense;protein_coding	109274	3	53910000	53915000	ACTR8'	'ACTR8'	protein_coding	20000	8	7.20478
109274	3	53910000	53915000	ACTR8'	'ACTR8'	protein_coding	109275	3	53915000	53920000	AC012467.1';ACTR8'	'AC012467.1';'ACTR8';'SELK'	noncoding_small_RNA;protein_coding	5000	123	25.3221
109275	3	53915000	53920000	AC012467.1';ACTR8'	'AC012467.1';'ACTR8';'SELK'	noncoding_small_RNA;protein_coding	109277	3	53925000	53930000	SELK'	'CATG00000060216.1';'SELK'	noncoding_lncRNA_divergent;protein_coding	10000	21	8.16685
10932	1	54655000	54660000	CYB5RL'	'CYB5RL';'RP11-446E24.4'	protein_coding	10933	1	54660000	54665000	CYB5RL';MRPL37';RP11-446E24.4'	'CYB5RL';'RP11-446E24.4'	protein_coding	5000	103	13.1362
109338	3	54230000	54235000	CACNA2D3'	'CACNA2D3'	protein_coding	109341	3	54245000	54250000		'CACNA2D3'	protein_coding	15000	20	14.1442
10940	1	54695000	54700000	SSBP3'	'SSBP3'	protein_coding	10938	1	54685000	54690000		'MRPL37';'SSBP3'	protein_coding	10000	47	26.5554
109426	3	54670000	54675000	ESRG'	'CACNA2D3'	protein_coding	109427	3	54675000	54680000		'CACNA2D3'	protein_coding	5000	73	9.50533
109478	3	54930000	54935000	CACNA2D3-AS1'	'CACNA2D3';'CACNA2D3-AS1'	noncoding_lncRNA_noncoding_antisense;protein_coding	109476	3	54920000	54925000		'CACNA2D3';'CACNA2D3-AS1'	noncoding_lncRNA_noncoding_antisense;protein_coding	10000	17	4.828
10951	1	54750000	54755000	RP5-997D24.3'	'RP5-997D24.3';'SSBP3'	noncoding_lncRNA_noncoding_antisense;protein_coding	10952	1	54755000	54760000		'SSBP3'	protein_coding	5000	54	5.10551
109533	3	55205000	55210000	RP11-889D3.1'	'CATG00000060229.1';'CATG00000064696.1';'RP11-889D3.1'	noncoding_lncRNA_intergenic;noncoding_lncRNA_lincRNA;uncertain_coding	109532	3	55200000	55205000		'CATG00000060229.1';'CATG00000064696.1';'RP11-889D3.1'	noncoding_lncRNA_intergenic;noncoding_lncRNA_lincRNA;uncertain_coding	5000	145	25.9141
109557	3	55325000	55330000	RP11-64C1.1'			109556	3	55320000	55325000				5000	79	10.8257
109568	3	55380000	55385000	RP11-875H7.1'	'CATG00000060233.1';'RP11-875H7.1'	noncoding_lncRNA_intergenic	109567	3	55375000	55380000		'CATG00000060233.1';'RP11-875H7.1'	noncoding_lncRNA_intergenic	5000	68	6.5486
10959	1	54790000	54795000	SSBP3'	'SSBP3'	protein_coding	10961	1	54800000	54805000	SSBP3'	'SSBP3'	protein_coding	10000	28	14.8001
109599	3	55535000	55540000	RP11-875H7.5'	'RP11-875H7.5'	noncoding_lncRNA_intergenic	109597	3	55525000	55530000		'RP11-875H7.5';'WNT5A-AS1'	noncoding_lncRNA_divergent;noncoding_lncRNA_intergenic	10000	23	11.1716
109599	3	55535000	55540000	RP11-875H7.5'	'RP11-875H7.5'	noncoding_lncRNA_intergenic	109604	3	55560000	55565000		'ERC2'	protein_coding	25000	7	6.71943
10961	1	54800000	54805000	SSBP3'	'SSBP3'	protein_coding	10963	1	54810000	54815000		'SSBP3'	protein_coding	10000	35	18.199
10965	1	54820000	54825000	SSBP3'	'SSBP3'	protein_coding	10966	1	54825000	54830000		'SSBP3'	protein_coding	5000	67	8.25896
109824	3	56660000	56665000	FAM208A'	'CCDC66';'FAM208A'	protein_coding	109823	3	56655000	56660000		'CCDC66';'FAM208A'	protein_coding	5000	73	10.8026
109859	3	56835000	56840000	ARHGEF3'	'ARHGEF3'	protein_coding	109861	3	56845000	56850000		'ARHGEF3'	protein_coding	10000	23	11.4677
109881	3	56945000	56950000	ARHGEF3'	'ARHGEF3';'CATG00000064733.1'	noncoding_sense_overlap_RNA;protein_coding	109883	3	56955000	56960000		'ARHGEF3'	protein_coding	10000	17	5.37608
109927	3	57175000	57180000	IL17RD'	'IL17RD'	protein_coding	109928	3	57180000	57185000		'IL17RD'	protein_coding	5000	75	10.0723
109995	3	57515000	57520000	RP11-229A12.2'	'DNAH12';'RP11-229A12.2'	noncoding_pseudogene;protein_coding	109996	3	57520000	57525000	RNU6-108P'	'DNAH12';'RNU6-108P'	noncoding_snRNA;protein_coding	5000	96	17.3753
109996	3	57520000	57525000	RNU6-108P'	'DNAH12';'RNU6-108P'	noncoding_snRNA;protein_coding	109998	3	57530000	57535000	DNAH12';RNU6-483P'	'DNAH12';'RNU6-483P'	noncoding_snRNA;protein_coding	10000	25	9.61831
110000	3	57540000	57545000	PDE12'	'CATG00000064744.1';'PDE12'	noncoding_lncRNA_divergent;protein_coding	110006	3	57570000	57575000		'ARF4';'CATG00000064748.1'	noncoding_lncRNA_noncoding_sense_intronic;protein_coding	30000	6	7.11494
110008	3	57580000	57585000	ARF4';RP11-755B10.4'	'ARF4';'RP11-755B10.4'	noncoding_lncRNA_divergent;protein_coding	110009	3	57585000	57590000		'RP11-755B10.4'	noncoding_lncRNA_divergent	5000	38	4.67721
110029	3	57685000	57690000	Y_RNA'	'RP11-755B10.3';'Y_RNA'	noncoding_lncRNA_divergent;noncoding_misc_RNA	110030	3	57690000	57695000		'RP11-755B10.3'	noncoding_lncRNA_divergent	5000	160	29.7577
110067	3	57875000	57880000	SLMAP'	'SLMAP'	protein_coding	110068	3	57880000	57885000	SLMAP'	'SLMAP'	protein_coding	5000	63	8.77804
110072	3	57900000	57905000	SLMAP'	'SLMAP'	protein_coding	110070	3	57890000	57895000		'SLMAP'	protein_coding	10000	47	22.2721
110091	3	57995000	58000000	FLNB'	'CATG00000060264.1';'FLNB'	noncoding_lncRNA_noncoding_sense_intronic;protein_coding	110089	3	57985000	57990000		'CATG00000064764.1'	noncoding_lncRNA_intergenic	10000	15	5.60089
110091	3	57995000	58000000	FLNB'	'CATG00000060264.1';'FLNB'	noncoding_lncRNA_noncoding_sense_intronic;protein_coding	110093	3	58005000	58010000		'CATG00000060267.1';'FLNB'	noncoding_sense_overlap_RNA;protein_coding	10000	13	5.49769
110105	3	58065000	58070000	FLNB'	'FLNB'	protein_coding	110106	3	58070000	58075000		'FLNB'	protein_coding	5000	92	13.5802
110119	3	58135000	58140000	FLNB'	'FLNB'	protein_coding	110112	3	58100000	58105000		'FLNB'	protein_coding	35000	5	6.32152
110118	3	58130000	58135000	FLNB'	'FLNB'	protein_coding	110117	3	58125000	58130000		'FLNB'	protein_coding	5000	59	8.02231
110119	3	58135000	58140000	FLNB'	'FLNB'	protein_coding	110121	3	58145000	58150000	FLNB-AS1'	'FLNB';'FLNB-AS1'	noncoding_lncRNA_noncoding_antisense;protein_coding	10000	30	13.6871
110130	3	58190000	58195000	DNASE1L3'	'DNASE1L3'	protein_coding	110131	3	58195000	58200000	DNASE1L3'	'DNASE1L3'	protein_coding	5000	59	6.64834
110132	3	58200000	58205000	DNASE1L3'	'CATG00000064776.1';'DNASE1L3'	noncoding_lncRNA_intergenic;protein_coding	110133	3	58205000	58210000				5000	90	13.7185
110145	3	58265000	58270000	ABHD6'	'ABHD6'	protein_coding	110146	3	58270000	58275000	ABHD6'	'ABHD6'	protein_coding	5000	56	7.01443
110147	3	58275000	58280000	ABHD6'	'ABHD6'	protein_coding	110150	3	58290000	58295000	RPP14'	'RPP14'	protein_coding	15000	20	15.5945
110153	3	58305000	58310000	RPP14'	'RPP14'	protein_coding	110155	3	58315000	58320000	PXK';RP11-80H18.4'	'CATG00000064780.1';'PXK';'RP11-80H18.4';'RPP14'	noncoding_lncRNA_divergent;noncoding_lncRNA_lincRNA;protein_coding	10000	43	24.2699
110174	3	58410000	58415000	RP11-802O23.3'	'PDHB';'PXK';'RP11-802O23.3'	noncoding_antisense;protein_coding	110172	3	58400000	58405000		'PDHB';'PXK'	protein_coding	10000	17	4.89552
110174	3	58410000	58415000	RP11-802O23.3'	'PDHB';'PXK';'RP11-802O23.3'	noncoding_antisense;protein_coding	110175	3	58415000	58420000	PDHB'	'CATG00000060290.1';'KCTD6';'PDHB'	noncoding_lncRNA_divergent;protein_coding	5000	172	36.7368
110191	3	58495000	58500000	RP11-359I18.1'	'ACOX2';'RP11-359I18.1'	noncoding_pseudogene;protein_coding	110190	3	58490000	58495000		'ACOX2';'KCTD6'	protein_coding	5000	82	12.2542
110194	3	58510000	58515000	ACOX2'	'ACOX2'	protein_coding	110190	3	58490000	58495000		'ACOX2';'KCTD6'	protein_coding	20000	8	6.14422
11041	1	55200000	55205000	TTC4'	'MROH7-TTC4';'TTC4'	protein_coding	11039	1	55190000	55195000		'MROH7-TTC4';'TTC4'	protein_coding	10000	67	32.1316
11052	1	55255000	55260000	RP11-67L3.2'	'RP11-67L3.2';'TTC22'	noncoding_antisense;protein_coding	11053	1	55260000	55265000		'RP11-67L3.2';'TTC22'	noncoding_antisense;protein_coding	5000	233	36.7368
11064	1	55315000	55320000	DHCR24'	'C1orf177';'DHCR24'	protein_coding	11060	1	55295000	55300000		'C1orf177'	protein_coding	20000	10	8.47953
11071	1	55350000	55355000	DHCR24';RP11-67L3.4';RP11-67L3.5'	'DHCR24';'RP11-67L3.4';'RP11-67L3.5'	noncoding_lncRNA_divergent;protein_coding	11066	1	55325000	55330000		'DHCR24'	protein_coding	25000	7	7.31934
110937	3	62225000	62230000	PTPRG'	'PTPRG'	protein_coding	110938	3	62230000	62235000	PTPRG'	'PTPRG'	protein_coding	5000	80	11.9362
111257	3	63825000	63830000	THOC7'	'C3orf49';'THOC7'	protein_coding	111258	3	63830000	63835000		'C3orf49';'THOC7'	protein_coding	5000	89	11.1294
111259	3	63835000	63840000	THOC7'	'THOC7'	protein_coding	111258	3	63830000	63835000		'C3orf49';'THOC7'	protein_coding	5000	81	9.93744
111262	3	63850000	63855000	ATXN7';THOC7'	'ATXN7';'THOC7'	protein_coding	111263	3	63855000	63860000		'ATXN7'	protein_coding	5000	55	4.76426
111286	3	63970000	63975000	ATXN7'	'ATXN7';'CATG00000064895.1'	noncoding_lncRNA_divergent;protein_coding	111288	3	63980000	63985000	ATXN7'	'ATXN7';'CATG00000064897.1'	noncoding_lncRNA_divergent;protein_coding	10000	26	9.8878
111292	3	64000000	64005000	PSMD6';RP11-245J9.6'	'PSMD6';'RP11-245J9.4'	noncoding_lncRNA_noncoding_antisense;protein_coding	111293	3	64005000	64010000	PSMD6';RP11-245J9.6'	'CATG00000060377.1';'PSMD6';'RP11-245J9.6'	noncoding_antisense;noncoding_lncRNA_intergenic;protein_coding	5000	155	34.0288
111324	3	64160000	64165000	PRDX3P4'	'PRDX3P4';'PRICKLE2'	noncoding_pseudogene;protein_coding	111322	3	64150000	64155000		'PRICKLE2'	protein_coding	10000	20	7.49097
111326	3	64170000	64175000	PRICKLE2-AS3'	'PRICKLE2';'PRICKLE2-AS3'	noncoding_lncRNA_noncoding_antisense;protein_coding	111327	3	64175000	64180000		'PRICKLE2';'PRICKLE2-AS3'	noncoding_lncRNA_noncoding_antisense;protein_coding	5000	231	36.7368
111333	3	64205000	64210000	PRICKLE2'	'PRICKLE2'	protein_coding	111331	3	64195000	64200000		'PRICKLE2'	protein_coding	10000	53	26.5629
111342	3	64250000	64255000	PRICKLE2'	'PRICKLE2'	protein_coding	111343	3	64255000	64260000		'PRICKLE2'	protein_coding	5000	152	24.7032
11136	1	55675000	55680000	USP24'	'CATG00000059355.1';'USP24'	noncoding_lncRNA_noncoding_sense_intronic;protein_coding	11137	1	55680000	55685000	RP11-101C11.1';USP24'	'RP11-101C11.1';'USP24'	noncoding_lncRNA_divergent;protein_coding	5000	65	10.5244
111391	3	64495000	64500000	RNU6-739P'	'RNU6-739P'	noncoding_snRNA	111390	3	64490000	64495000				5000	143	28.7278
111395	3	64515000	64520000	ADAMTS9'	'ADAMTS9'	protein_coding	111571	3	65395000	65400000		'MAGI1'	protein_coding	880000	5	6.01987
111585	3	65465000	65470000	MAGI1'	'MAGI1'	protein_coding	111586	3	65470000	65475000		'MAGI1'	protein_coding	5000	83	12.3017
111606	3	65570000	65575000	AC104438.1'	'AC104438.1';'MAGI1'	noncoding_pseudogene;protein_coding	111603	3	65555000	65560000		'MAGI1'	protein_coding	15000	20	14.9395
111677	3	65925000	65930000	AC106827.2'	'AC106827.2';'MAGI1';'MAGI1-IT1'	noncoding_lncRNA_noncoding_sense_intronic;noncoding_miRNA;protein_coding	111671	3	65895000	65900000		'MAGI1';'MAGI1-AS1';'MAGI1-IT1'	noncoding_antisense;noncoding_lncRNA_noncoding_sense_intronic;protein_coding	30000	7	7.84209
111677	3	65925000	65930000	AC106827.2'	'AC106827.2';'MAGI1';'MAGI1-IT1'	noncoding_lncRNA_noncoding_sense_intronic;noncoding_miRNA;protein_coding	111678	3	65930000	65935000		'CATG00000064951.1';'MAGI1';'MAGI1-IT1'	noncoding_lncRNA_noncoding_sense_intronic;noncoding_sense_overlap_RNA;protein_coding	5000	77	10.3419
111679	3	65935000	65940000	MAGI1-IT1'	'CATG00000064951.1';'MAGI1';'MAGI1-IT1'	noncoding_lncRNA_noncoding_sense_intronic;noncoding_sense_overlap_RNA;protein_coding	111678	3	65930000	65935000		'CATG00000064951.1';'MAGI1';'MAGI1-IT1'	noncoding_lncRNA_noncoding_sense_intronic;noncoding_sense_overlap_RNA;protein_coding	5000	51	5.40421
111785	3	66465000	66470000	LRIG1'	'LRIG1'	protein_coding	111786	3	66470000	66475000		'LRIG1'	protein_coding	5000	83	11.2336
111795	3	66515000	66520000	LRIG1'	'LRIG1'	protein_coding	111796	3	66520000	66525000	LRIG1'	'LRIG1'	protein_coding	5000	114	22.3883
111801	3	66545000	66550000	LRIG1'	'LRIG1'	protein_coding	111800	3	66540000	66545000		'CATG00000064965.1';'LRIG1'	noncoding_lncRNA_noncoding_sense_intronic;protein_coding	5000	86	14.5676
111829	3	66685000	66690000	RPL21P41'	'CATG00000064967.1';'RPL21P41'	noncoding_lncRNA_intergenic;noncoding_pseudogene	111827	3	66675000	66680000		'CATG00000064967.1'	noncoding_lncRNA_intergenic	10000	32	15.7165
112035	3	67715000	67720000	RP11-81N13.1'	'RP11-81N13.1'	noncoding_lncRNA_divergent	112031	3	67695000	67700000		'SUCLG2'	protein_coding	20000	8	5.6167
112310	3	69090000	69095000	TMF1'	'CTD-2013N24.2';'TMF1'	noncoding_lncRNA_divergent;protein_coding	112311	3	69095000	69100000	MIR3136'	'CTD-2013N24.2';'MIR3136';'TMF1'	noncoding_lncRNA_divergent;noncoding_miRNA;protein_coding	5000	52	6.10802
112317	3	69125000	69130000	UBA3'	'CATG00000060467.1';'UBA3'	noncoding_lncRNA_divergent;protein_coding	112322	3	69150000	69155000		'ARL6IP5'	protein_coding	25000	5	5.01182
112341	3	69245000	69250000	FRMD4B'	'FRMD4B'	protein_coding	112344	3	69260000	69265000		'FRMD4B'	protein_coding	15000	11	7.67709
112360	3	69340000	69345000	FRMD4B'	'FRMD4B'	protein_coding	112358	3	69330000	69335000		'FRMD4B'	protein_coding	10000	16	4.76966
112378	3	69430000	69435000	FRMD4B'	'FRMD4B'	protein_coding	112382	3	69450000	69455000		'FRMD4B'	protein_coding	20000	8	5.39187
112485	3	69965000	69970000	AC099326.1'	'AC099326.1';'MITF'	noncoding_miRNA;protein_coding	112484	3	69960000	69965000		'MITF'	protein_coding	5000	65	6.18467
112486	3	69970000	69975000	AC099326.1'	'MITF'	protein_coding	112487	3	69975000	69980000		'MITF'	protein_coding	5000	86	12.9652
11258	1	56285000	56290000	RP11-90C4.1'	'CATG00000059442.1';'CATG00000059446.1';'RP11-466L17.1';'RP11-90C4.1'	noncoding_lncRNA_intergenic;noncoding_lncRNA_noncoding_sense_intronic;noncoding_sense_overlap_RNA	11257	1	56280000	56285000		'CATG00000059442.1';'RP11-466L17.1';'RP11-90C4.1'	noncoding_lncRNA_intergenic;noncoding_lncRNA_noncoding_sense_intronic	5000	98	11.8819
11258	1	56285000	56290000	RP11-90C4.1'	'CATG00000059442.1';'CATG00000059446.1';'RP11-466L17.1';'RP11-90C4.1'	noncoding_lncRNA_intergenic;noncoding_lncRNA_noncoding_sense_intronic;noncoding_sense_overlap_RNA	11260	1	56295000	56300000		'CATG00000059442.1';'RP11-466L17.1';'RP11-90C4.1'	noncoding_lncRNA_intergenic;noncoding_lncRNA_noncoding_sense_intronic	10000	29	9.18906
11259	1	56290000	56295000	RP11-90C4.1'	'CATG00000059442.1';'RP11-466L17.1';'RP11-90C4.1'	noncoding_lncRNA_intergenic;noncoding_lncRNA_noncoding_sense_intronic	11260	1	56295000	56300000		'CATG00000059442.1';'RP11-466L17.1';'RP11-90C4.1'	noncoding_lncRNA_intergenic;noncoding_lncRNA_noncoding_sense_intronic	5000	100	14.6116
112677	3	70925000	70930000	AC096971.1'	'AC096971.1'	noncoding_miRNA	112678	3	70930000	70935000				5000	60	5.26422
112712	3	71100000	71105000	FOXP1'	'FOXP1'	protein_coding	112711	3	71095000	71100000		'FOXP1'	protein_coding	5000	81	14.3483
112715	3	71115000	71120000	FOXP1'	'FOXP1'	protein_coding	112713	3	71105000	71110000		'FOXP1'	protein_coding	10000	15	6.12878
112715	3	71115000	71120000	FOXP1'	'FOXP1'	protein_coding	112716	3	71120000	71125000		'FOXP1'	protein_coding	5000	62	10.0471
112728	3	71180000	71185000	FOXP1'	'FOXP1'	protein_coding	112729	3	71185000	71190000		'FOXP1'	protein_coding	5000	57	6.19927
112773	3	71405000	71410000	FOXP1'	'FOXP1'	protein_coding	112772	3	71400000	71405000		'FOXP1'	protein_coding	5000	76	9.73476
112817	3	71625000	71630000	FOXP1'	'CATG00000065037.1';'FOXP1'	noncoding_lncRNA_noncoding_sense_intronic;protein_coding	112819	3	71635000	71640000	RP11-154H23.3'	'CATG00000060519.1';'FOXP1';'RP11-154H23.3'	noncoding_lncRNA_divergent;protein_coding	10000	34	16.1211
112932	3	72200000	72205000	LINC00870'	'LINC00870';'LINC00877'	noncoding_lncRNA_intergenic	112934	3	72210000	72215000		'LINC00870';'LINC00877'	noncoding_lncRNA_intergenic	10000	14	5.01747
112954	3	72310000	72315000	AC112219.1'	'AC112219.1';'LINC00877'	noncoding_lncRNA_intergenic;noncoding_miRNA	112952	3	72300000	72305000		'LINC00877'	noncoding_lncRNA_intergenic	10000	17	6.38059
112965	3	72365000	72370000	RP11-447M4.1'			112969	3	72385000	72390000		'CATG00000060551.1'	noncoding_lncRNA_intergenic	20000	6	5.06543
112990	3	72490000	72495000	RYBP'	'RYBP'	protein_coding	112988	3	72480000	72485000		'CATG00000065058.1';'RYBP'	noncoding_lncRNA_noncoding_sense_intronic;protein_coding	10000	23	8.31396
112990	3	72490000	72495000	RYBP'	'RYBP'	protein_coding	112991	3	72495000	72500000	RYBP'	'CATG00000060552.1';'RYBP'	noncoding_lncRNA_divergent;protein_coding	5000	100	18.0922
113070	3	72890000	72895000	SHQ1'	'SHQ1'	protein_coding	113069	3	72885000	72890000		'SHQ1'	protein_coding	5000	127	21.7844
113078	3	72930000	72935000	RP11-728B21.3'	'CATG00000060561.1';'RP11-728B21.3'	noncoding_lncRNA_divergent;noncoding_pseudogene	113079	3	72935000	72940000	GXYLT2'	'CATG00000060561.1';'CATG00000065072.1';'GXYLT2'	noncoding_lncRNA_divergent;noncoding_lncRNA_noncoding_antisense;protein_coding	5000	155	31.2645
113107	3	73075000	73080000	RNU7-19P'	'GXYLT2';'PPP4R2';'RNU7-19P'	noncoding_small_RNA;protein_coding	113106	3	73070000	73075000		'GXYLT2';'PPP4R2'	protein_coding	5000	51	5.94276
113107	3	73075000	73080000	RNU7-19P'	'GXYLT2';'PPP4R2';'RNU7-19P'	noncoding_small_RNA;protein_coding	113109	3	73085000	73090000		'CATG00000060565.1';'GXYLT2';'PPP4R2'	noncoding_lncRNA_noncoding_sense_intronic;protein_coding	10000	21	9.71374
113212	3	73600000	73605000	PDZRN3'	'CATG00000060577.1';'PDZRN3'	noncoding_lncRNA_noncoding_antisense;protein_coding	113211	3	73595000	73600000		'CATG00000060577.1';'PDZRN3'	noncoding_lncRNA_noncoding_antisense;protein_coding	5000	124	29.0664
113220	3	73640000	73645000	RNU7-119P'	'PDZRN3';'RNU7-119P'	noncoding_snRNA;protein_coding	113216	3	73620000	73625000		'CATG00000060577.1';'PDZRN3'	noncoding_lncRNA_noncoding_antisense;protein_coding	20000	15	16.1537
113544	3	75260000	75265000	HNRNPA3P6';MIR4444-1'	'HNRNPA3P6';'MIR4444-1'	noncoding_pseudogene;noncoding_small_RNA	113543	3	75255000	75260000				5000	74	9.6551
113627	3	75675000	75680000	MIR1324'	'AGGF1P3';'MIR1324';'RP11-413E6.1'	noncoding_miRNA;noncoding_pseudogene	113629	3	75685000	75690000		'AGGF1P3';'CATG00000060615.1';'RP11-413E6.1'	noncoding_lncRNA_noncoding_antisense;noncoding_pseudogene	10000	40	19.3022
113632	3	75700000	75705000	AGGF1P3'	'AGGF1P3';'RP11-413E6.1'	noncoding_pseudogene	113631	3	75695000	75700000		'AGGF1P3';'CATG00000060615.1';'CATG00000060616.1';'RP11-413E6.1'	noncoding_lncRNA_noncoding_antisense;noncoding_pseudogene	5000	112	12.8481
113632	3	75700000	75705000	AGGF1P3'	'AGGF1P3';'RP11-413E6.1'	noncoding_pseudogene	113633	3	75705000	75710000	RARRES2P1'	'AGGF1P3';'RARRES2P1';'RP11-413E6.1'	noncoding_pseudogene	5000	125	16.8032
138061	3	197845000	197850000	AC073135.4';TUBB8P8'	'AC073135.4';'TUBB8P8'	noncoding_pseudogene	113642	3	75750000	75755000		'ZNF717'	protein_coding	122095000	5	9.3143
113644	3	75760000	75765000	RN7SL92P'	'RN7SL92P';'ZNF717'	noncoding_misc_RNA;protein_coding	113643	3	75755000	75760000		'ZNF717'	protein_coding	5000	299	36.7368
138061	3	197845000	197850000	AC073135.4';TUBB8P8'	'AC073135.4';'TUBB8P8'	noncoding_pseudogene	113643	3	75755000	75760000		'ZNF717'	protein_coding	122090000	8	15.912
11402	1	57005000	57010000	RPL21P23'	'PPAP2B'	protein_coding	11403	1	57010000	57015000		'PPAP2B'	protein_coding	5000	92	13.7531
114021	3	77645000	77650000	ROBO2'	'ROBO2'	protein_coding	114022	3	77650000	77655000	ROBO2'	'ROBO2'	protein_coding	5000	56	6.19408
11410	1	57045000	57050000	PPAP2B'	'PPAP2B'	protein_coding	11407	1	57030000	57035000		'PPAP2B'	protein_coding	15000	16	10.4847
114124	3	78160000	78165000	RN7SL647P'	'CATG00000065115.1';'RN7SL647P'	noncoding_misc_RNA;protein_coding	114126	3	78170000	78175000		'CATG00000065115.1'	protein_coding	10000	21	9.29399
11418	1	57085000	57090000	RP11-377K22.2'	'RP11-377K22.2'	noncoding_pseudogene	11419	1	57090000	57095000				5000	101	14.8521
11422	1	57105000	57110000	PPAP2B';PRKAA2'			11420	1	57095000	57100000				10000	23	10.4656
11422	1	57105000	57110000	PPAP2B';PRKAA2'			11423	1	57110000	57115000	PPAP2B';PRKAA2'	'PRKAA2'	protein_coding	5000	51	5.39027
114253	3	78805000	78810000	RP11-588D3.1'	'ROBO1';'RP11-588D3.1'	noncoding_pseudogene;protein_coding	114254	3	78810000	78815000		'ROBO1'	protein_coding	5000	70	6.4207
1146	1	5725000	5730000	RP11-154H17.1'	'RP11-154H17.1'	noncoding_lncRNA_intergenic	1144	1	5715000	5720000		'RP11-154H17.1'	noncoding_lncRNA_intergenic	10000	18	7.60807
11457	1	57280000	57285000	C1orf168'	'C1orf168'	protein_coding	11455	1	57270000	57275000		'C1orf168'	protein_coding	10000	31	14.0459
114655	3	80815000	80820000	RP11-47P18.2'	'CATG00000065180.1';'RP11-47P18.1';'RP11-47P18.2'	noncoding_lncRNA_intergenic;noncoding_lncRNA_lincRNA	114656	3	80820000	80825000		'CATG00000065180.1';'RP11-47P18.1';'RP11-47P18.2'	noncoding_lncRNA_intergenic;noncoding_lncRNA_lincRNA	5000	42	4.77032
11480	1	57395000	57400000	C8B'	'C8B'	protein_coding	11478	1	57385000	57390000				10000	23	7.47911
11480	1	57395000	57400000	C8B'	'C8B'	protein_coding	11479	1	57390000	57395000		'C8B'	protein_coding	5000	63	7.56052
114836	3	81720000	81725000	GBE1'	'GBE1'	protein_coding	114837	3	81725000	81730000		'GBE1'	protein_coding	5000	157	28.8062
115946	3	87270000	87275000	MIR4795'	'MIR4795'	noncoding_small_RNA	115947	3	87275000	87280000	CHMP2B';MIR4795'	'CHMP2B';'MIR4795'	noncoding_small_RNA;protein_coding	5000	55	5.92653
115966	3	87370000	87375000	KRT8P25'	'KRT8P25'	noncoding_pseudogene	115965	3	87365000	87370000				5000	143	22.1415
116020	3	87640000	87645000	APOOP2'	'APOOP2'	noncoding_pseudogene	116021	3	87645000	87650000				5000	47	5.93956
116050	3	87790000	87795000	RNU6-873P'	'RNU6-873P';'RP11-451B8.1'	noncoding_lncRNA_intergenic;noncoding_snRNA	116048	3	87780000	87785000		'RP11-451B8.1'	noncoding_lncRNA_intergenic	10000	29	12.9122
116112	3	88100000	88105000	CGGBP1'	'CGGBP1'	protein_coding	116114	3	88110000	88115000		'CGGBP1';'RP11-159G9.5'	protein_coding	10000	16	5.60772
11710	1	58545000	58550000	RP11-393I23.3'	'DAB1';'RP11-393I23.4'	noncoding_lncRNA_lincRNA;protein_coding	11712	1	58555000	58560000		'DAB1'	protein_coding	10000	24	10.0702
117231	3	93695000	93700000	ARL13B';RNU6-511P'	'ARL13B';'PROS1';'RNU6-511P'	noncoding_snRNA;protein_coding	117232	3	93700000	93705000	ARL13B'	'ARL13B'	protein_coding	5000	169	35.3505
117241	3	93745000	93750000	STX19'	'ARL13B';'STX19'	protein_coding	117240	3	93740000	93745000		'ARL13B';'STX19'	protein_coding	5000	68	7.22955
117336	3	94220000	94225000	ARMC10P1'	'ARMC10P1'	noncoding_pseudogene	117338	3	94230000	94235000				10000	27	11.5675
11743	1	58710000	58715000	DAB1'	'DAB1'	protein_coding	11751	1	58750000	58755000		'DAB1';'OMA1'	protein_coding	40000	5	4.98209
117798	3	96530000	96535000	EPHA6'	'CATG00000065324.1';'EPHA6'	noncoding_lncRNA_divergent;protein_coding	117800	3	96540000	96545000		'EPHA6'	protein_coding	10000	24	9.27331
117931	3	97195000	97200000	RP11-529P9.1'	'EPHA6'	protein_coding	117932	3	97200000	97205000	RP11-529P9.1'	'EPHA6';'RP11-529P9.1'	noncoding_pseudogene;protein_coding	5000	61	7.42016
118020	3	97640000	97645000	CRYBG3'	'CRYBG3';'MINA'	protein_coding	118021	3	97645000	97650000		'CRYBG3';'MINA'	protein_coding	5000	45	5.36056
118030	3	97690000	97695000	MINA'	'CATG00000061021.1';'MINA'	noncoding_lncRNA_divergent;protein_coding	118034	3	97710000	97715000		'GABRR3'	noncoding_pseudogene	20000	8	5.15344
118056	3	97820000	97825000	OR5AC4P'	'OR5AC4P';'RP11-343D2.11'	noncoding_antisense;noncoding_pseudogene	118057	3	97825000	97830000		'RP11-343D2.11'	noncoding_antisense	5000	61	6.05087
118138	3	98230000	98235000	CLDND1'	'CLDND1';'CPOX'	protein_coding	118139	3	98235000	98240000	CLDND1'	'CLDND1';'CPOX'	protein_coding	5000	187	36.7368
11820	1	59095000	59100000	RP4-592A1.2'	'CATG00000002414.1';'RP4-592A1.2'	noncoding_lncRNA_intergenic;noncoding_pseudogene	11819	1	59090000	59095000		'CATG00000002414.1'	noncoding_lncRNA_intergenic	5000	87	10.3647
11831	1	59150000	59155000	MYSM1'	'CATG00000002414.1';'MYSM1'	noncoding_lncRNA_intergenic;protein_coding	11832	1	59155000	59160000	MYSM1'	'CATG00000002414.1';'MYSM1'	noncoding_lncRNA_intergenic;protein_coding	5000	101	13.2391
118406	3	99570000	99575000	FILIP1L'	'CMSS1';'FILIP1L'	protein_coding	118407	3	99575000	99580000		'CMSS1';'FILIP1L'	protein_coding	5000	50	5.45271
118487	3	99975000	99980000	TBC1D23'	'CATG00000065366.1';'TBC1D23'	noncoding_lncRNA_divergent;protein_coding	118488	3	99980000	99985000	TBC1D23'	'CATG00000065366.1';'TBC1D23'	noncoding_lncRNA_divergent;protein_coding	5000	79	11.8899
11850	1	59245000	59250000	JUN';LINC01135'	'JUN';'RP4-794H19.2'	noncoding_lncRNA_divergent;protein_coding	11849	1	59240000	59245000		'JUN'	protein_coding	5000	53	6.08563
118498	3	100030000	100035000	TBC1D23'	'TBC1D23'	protein_coding	118501	3	100045000	100050000		'CATG00000065372.1';'TBC1D23'	noncoding_lncRNA_divergent;protein_coding	15000	23	18.0557
118510	3	100090000	100095000	TOMM70A'	'NIT2';'TOMM70A'	protein_coding	118512	3	100100000	100105000	TOMM70A'	'TOMM70A'	protein_coding	10000	30	15.106
118510	3	100090000	100095000	TOMM70A'	'NIT2';'TOMM70A'	protein_coding	118514	3	100110000	100115000		'TOMM70A'	protein_coding	20000	7	5.26826
118512	3	100100000	100105000	TOMM70A'	'TOMM70A'	protein_coding	118514	3	100110000	100115000		'TOMM70A'	protein_coding	10000	39	22.2432
118534	3	100210000	100215000	TMEM45A'	'TMEM45A'	protein_coding	118535	3	100215000	100220000		'TMEM45A'	protein_coding	5000	61	6.28818
118549	3	100285000	100290000	TMEM45A'	'TMEM45A'	protein_coding	118547	3	100275000	100280000		'TMEM45A'	protein_coding	10000	20	8.40739
118557	3	100325000	100330000	GPR128'	'GPR128'	protein_coding	118554	3	100310000	100315000				15000	9	5.59976
11856	1	59275000	59280000	RP11-63G10.3'	'RP11-63G10.3';'RP4-794H19.2'	noncoding_lncRNA_divergent;noncoding_lncRNA_lincRNA	11857	1	59280000	59285000		'RP4-794H19.2'	noncoding_lncRNA_divergent	5000	128	28.0721
118564	3	100360000	100365000	SNORA31'	'GPR128';'SNORA31'	noncoding_snoRNA;protein_coding	118565	3	100365000	100370000	SNORA31'	'GPR128';'SNORA31'	noncoding_snoRNA;protein_coding	5000	132	19.0265
118584	3	100460000	100465000	TFG'	'ABI3BP';'TFG'	protein_coding	118579	3	100435000	100440000		'TFG'	protein_coding	25000	14	16.2853
118770	3	101390000	101395000	ZBTB11';ZBTB11-AS1'	'ZBTB11'	protein_coding	118772	3	101400000	101405000	RPL24'	'RPL24';'ZBTB11-AS1'	noncoding_lncRNA_divergent;protein_coding	10000	13	5.17032
118772	3	101400000	101405000	RPL24'	'RPL24';'ZBTB11-AS1'	noncoding_lncRNA_divergent;protein_coding	118773	3	101405000	101410000	RPL24'	'RPL24';'ZBTB11-AS1'	noncoding_lncRNA_divergent;protein_coding	5000	57	6.96202
118791	3	101495000	101500000	NXPE3'	'CATG00000065395.1';'NXPE3'	noncoding_lncRNA_divergent;protein_coding	118792	3	101500000	101505000	NXPE3'	'NXPE3'	protein_coding	5000	59	7.99169
118793	3	101505000	101510000	NXPE3'	'NXPE3'	protein_coding	118794	3	101510000	101515000		'NXPE3'	protein_coding	5000	108	16.1432
118800	3	101540000	101545000	RP11-49I4.3'	'CATG00000065396.1';'NXPE3';'RP11-49I4.3'	noncoding_antisense;noncoding_lncRNA_noncoding_antisense;protein_coding	118797	3	101525000	101530000		'NXPE3'	protein_coding	15000	17	8.93944
118800	3	101540000	101545000	RP11-49I4.3'	'CATG00000065396.1';'NXPE3';'RP11-49I4.3'	noncoding_antisense;noncoding_lncRNA_noncoding_antisense;protein_coding	118801	3	101545000	101550000	NFKBIZ'	'CATG00000065396.1';'NFKBIZ';'NXPE3'	noncoding_lncRNA_noncoding_antisense;protein_coding	5000	98	11.1365
118801	3	101545000	101550000	NFKBIZ'	'CATG00000065396.1';'NFKBIZ';'NXPE3'	noncoding_lncRNA_noncoding_antisense;protein_coding	118802	3	101550000	101555000		'NFKBIZ'	protein_coding	5000	84	12.5386
118826	3	101670000	101675000	Y_RNA'	'RP11-221J22.1';'Y_RNA'	noncoding_lncRNA_intergenic;noncoding_misc_RNA	118825	3	101665000	101670000		'RP11-221J22.1'	noncoding_lncRNA_intergenic	5000	173	36.7368
118855	3	101815000	101820000	ZPLD1'			118854	3	101810000	101815000				5000	139	25.8059
118855	3	101815000	101820000	ZPLD1'			118858	3	101830000	101835000				15000	24	17.7148
118871	3	101895000	101900000	ZPLD1'	'CATG00000065413.1';'ZPLD1'	noncoding_lncRNA_noncoding_antisense;protein_coding	118872	3	101900000	101905000		'ZPLD1'	protein_coding	5000	48	5.94331
118970	3	102390000	102395000	RP11-280H21.1'	'CATG00000061124.1';'CATG00000061129.1';'RP11-280H21.1'	noncoding_lncRNA_intergenic;noncoding_sense_overlap_RNA	118969	3	102385000	102390000		'CATG00000061124.1';'RP11-280H21.1'	noncoding_lncRNA_intergenic	5000	45	4.99046
11905	1	59520000	59525000	RP11-145M4.1';RP11-145M4.3'	'RP11-145M4.1';'RP11-145M4.2';'RP11-145M4.3';'RP4-794H19.4'	noncoding_lncRNA_intergenic;noncoding_lncRNA_lincRNA	11904	1	59515000	59520000		'RP11-145M4.2';'RP11-145M4.3';'RP4-794H19.4'	noncoding_lncRNA_intergenic	5000	161	26.2941
11909	1	59540000	59545000	RP11-145M4.2'	'RP11-145M4.2';'RP11-145M4.3';'RP4-794H19.4'	noncoding_lncRNA_intergenic	11908	1	59535000	59540000		'RP11-145M4.2';'RP11-145M4.3';'RP4-794H19.4'	noncoding_lncRNA_intergenic	5000	65	6.49532
11933	1	59660000	59665000	RP11-470E16.1'	'RP11-470E16.1'	noncoding_lncRNA_intergenic	11937	1	59680000	59685000				20000	29	28.3087
11952	1	59755000	59760000	RP11-467C18.1'	'CATG00000002496.1';'RP11-467C18.1'	noncoding_lncRNA_divergent;noncoding_lncRNA_intergenic	11953	1	59760000	59765000	FGGY'	'FGGY';'RP11-467C18.1'	noncoding_lncRNA_divergent;protein_coding	5000	133	22.5249
119538	3	105230000	105235000	ALCAM'	'ALCAM'	protein_coding	119535	3	105215000	105220000		'ALCAM'	protein_coding	15000	14	7.63028
119541	3	105245000	105250000	ALCAM'	'ALCAM'	protein_coding	119540	3	105240000	105245000		'ALCAM'	protein_coding	5000	89	13.492
119569	3	105385000	105390000	CBLB'	'CBLB'	protein_coding	119570	3	105390000	105395000	CBLB'	'CBLB'	protein_coding	5000	70	9.01448
119571	3	105395000	105400000	CBLB'	'CBLB'	protein_coding	119573	3	105405000	105410000		'CBLB'	protein_coding	10000	22	8.39906
119576	3	105420000	105425000	CBLB'	'CBLB'	protein_coding	119573	3	105405000	105410000		'CBLB'	protein_coding	15000	23	19.141
119861	3	106845000	106850000	LINC00882'	'LINC00882';'RP11-446H18.5'	noncoding_lncRNA_intergenic	119863	3	106855000	106860000		'LINC00882';'RP11-446H18.5'	noncoding_lncRNA_intergenic	10000	33	16.672
11996	1	59975000	59980000	FGGY'	'FGGY'	protein_coding	11995	1	59970000	59975000		'FGGY'	protein_coding	5000	143	25.0388
119964	3	107360000	107365000	BBX'	'BBX'	protein_coding	119966	3	107370000	107375000		'BBX'	protein_coding	10000	32	13.7078
120047	3	107775000	107780000	CD47'	'CD47'	protein_coding	120049	3	107785000	107790000		'CATG00000065548.1';'CD47'	noncoding_sense_overlap_RNA;protein_coding	10000	18	7.09428
120061	3	107845000	107850000	RP11-861A13.4'	'CATG00000065552.1';'RP11-861A13.4'	noncoding_lncRNA_intergenic	120062	3	107850000	107855000		'CATG00000065552.1';'RP11-861A13.4'	noncoding_lncRNA_intergenic	5000	97	14.7877
120079	3	107935000	107940000	IFT57'	'IFT57'	protein_coding	120080	3	107940000	107945000	IFT57'	'HHLA2';'IFT57'	protein_coding	5000	73	9.31957
120094	3	108010000	108015000	HHLA2'	'HHLA2'	protein_coding	120096	3	108020000	108025000	HHLA2'	'HHLA2'	protein_coding	10000	24	7.14975
120150	3	108290000	108295000	SNORA70'	'DZIP3';'KIAA1524';'SNORA70'	noncoding_snoRNA;protein_coding	120153	3	108305000	108310000	DZIP3';KIAA1524'	'DZIP3';'KIAA1524'	protein_coding	15000	14	10.3045
12021	1	60100000	60105000	FGGY'	'FGGY'	protein_coding	12020	1	60095000	60100000		'FGGY'	protein_coding	5000	175	28.5151
120255	3	108815000	108820000	MORC1-AS1'	'MORC1'	protein_coding	120254	3	108810000	108815000		'MORC1'	protein_coding	5000	176	36.7368
12029	1	60140000	60145000	FGGY'	'FGGY'	protein_coding	12027	1	60130000	60135000		'FGGY'	protein_coding	10000	18	6.06885
12040	1	60195000	60200000	MIR4711'	'FGGY';'MIR4711'	noncoding_miRNA;protein_coding	12041	1	60200000	60205000		'FGGY'	protein_coding	5000	145	22.7307
120734	3	111210000	111215000	RP11-615J4.3'	'CD96';'RP11-615J4.3';'ZBED2'	noncoding_lncRNA_lincRNA;protein_coding	120735	3	111215000	111220000	RP11-615J4.3'	'CD96';'RP11-615J4.3';'ZBED2'	noncoding_lncRNA_lincRNA;protein_coding	5000	81	11.3107
120770	3	111390000	111395000	PLCXD2'	'PHLDB2';'PLCXD2'	protein_coding	120771	3	111395000	111400000	PLCXD2-AS1'	'PHLDB2';'PLCXD2';'PLCXD2-AS1'	noncoding_lncRNA_noncoding_antisense;protein_coding	5000	82	9.57071
120782	3	111450000	111455000	PHLDB2';PLCXD2'	'CATG00000065618.1';'PHLDB2';'PLCXD2'	noncoding_lncRNA_divergent;protein_coding	120783	3	111455000	111460000		'CATG00000065618.1';'PHLDB2';'PLCXD2'	noncoding_lncRNA_divergent;protein_coding	5000	82	15.2054
120807	3	111575000	111580000	PHLDB2'	'CATG00000065618.1';'CATG00000065621.1';'PHLDB2'	noncoding_lncRNA_divergent;protein_coding	120808	3	111580000	111585000		'PHLDB2'	protein_coding	5000	104	18.4628
120812	3	111600000	111605000	PHLDB2'	'PHLDB2'	protein_coding	120808	3	111580000	111585000		'PHLDB2'	protein_coding	20000	21	22.0279
120828	3	111680000	111685000	PHLDB2'	'PHLDB2'	protein_coding	120830	3	111690000	111695000		'PHLDB2'	protein_coding	10000	22	8.66805
120831	3	111695000	111700000	ABHD10'	'ABHD10';'PHLDB2'	protein_coding	120830	3	111690000	111695000		'PHLDB2'	protein_coding	5000	74	8.79035
120831	3	111695000	111700000	ABHD10'	'ABHD10';'PHLDB2'	protein_coding	120832	3	111700000	111705000		'ABHD10'	protein_coding	5000	145	24.3718
120853	3	111805000	111810000	C3orf52'	'C3orf52'	protein_coding	120854	3	111810000	111815000		'C3orf52'	protein_coding	5000	60	7.08974
12088	1	60435000	60440000	RN7SL475P'			12087	1	60430000	60435000		'CATG00000002591.1'	noncoding_lncRNA_intergenic	5000	75	9.97369
120893	3	112005000	112010000	SLC9C1'	'SLC9C1'	protein_coding	120891	3	111995000	112000000		'SLC9C1'	protein_coding	10000	22	8.85672
120896	3	112020000	112025000	RP11-90K6.1'	'CATG00000065623.1';'RP11-90K6.1';'SLC9C1'	noncoding_lncRNA_intergenic;protein_coding	120897	3	112025000	112030000	RP11-90K6.1'	'RP11-90K6.1';'SLC9C1'	noncoding_lncRNA_intergenic;protein_coding	5000	91	15.6278
120917	3	112125000	112130000	RP11-231E6.1'	'RP11-231E6.1'	noncoding_lncRNA_intergenic	120915	3	112115000	112120000		'RP11-231E6.1'	noncoding_lncRNA_intergenic	10000	21	11.5234
120929	3	112185000	112190000	BTLA'	'BTLA'	protein_coding	120930	3	112190000	112195000		'BTLA'	protein_coding	5000	106	19.8923
120950	3	112290000	112295000	SLC35A5'	'SLC35A5'	protein_coding	120946	3	112270000	112275000		'ATG3';'CATG00000065628.1'	noncoding_sense_overlap_RNA;protein_coding	20000	14	12.2718
121089	3	112985000	112990000	BOC'	'BOC';'CATG00000065643.1'	noncoding_lncRNA_divergent;protein_coding	121091	3	112995000	113000000	BOC'	'BOC'	protein_coding	10000	18	7.94438
121091	3	112995000	113000000	BOC'	'BOC'	protein_coding	121093	3	113005000	113010000		'BOC';'WDR52'	protein_coding	10000	16	6.48901
12113	1	60560000	60565000	PGBD4P8'	'C1orf87';'PGBD4P8'	noncoding_pseudogene;protein_coding	12112	1	60555000	60560000		'C1orf87'	protein_coding	5000	258	36.7368
12116	1	60575000	60580000	RP11-575B7.3'	'C1orf87'	protein_coding	12112	1	60555000	60560000		'C1orf87'	protein_coding	20000	12	7.67571
121152	3	113300000	113305000	SIDT1'	'SIDT1';'SIDT1-AS1'	noncoding_lncRNA_noncoding_antisense;protein_coding	121150	3	113290000	113295000		'SIDT1'	protein_coding	10000	33	18.4233
121195	3	113515000	113520000	ATP6V1A'	'ATP6V1A'	protein_coding	121193	3	113505000	113510000		'ATP6V1A'	protein_coding	10000	21	9.05163
121204	3	113560000	113565000	GRAMD1C'	'GRAMD1C'	protein_coding	121205	3	113565000	113570000	RP11-435F17.1'	'GRAMD1C';'RP11-435F17.1'	noncoding_pseudogene;protein_coding	5000	57	6.30761
121223	3	113655000	113660000	GRAMD1C'	'GRAMD1C'	protein_coding	121221	3	113645000	113650000		'GRAMD1C'	protein_coding	10000	19	7.09064
121227	3	113675000	113680000	ZDHHC23'	'ZDHHC23'	protein_coding	121229	3	113685000	113690000		'KIAA1407';'ZDHHC23'	protein_coding	10000	35	17.1751
121232	3	113700000	113705000	RP11-255E6.5'	'KIAA1407';'RP11-255E6.5';'ZDHHC23'	noncoding_pseudogene;protein_coding	121229	3	113685000	113690000		'KIAA1407';'ZDHHC23'	protein_coding	15000	23	17.3097
121378	3	114430000	114435000	ZBTB20'	'ZBTB20'	protein_coding	121379	3	114435000	114440000		'ZBTB20'	protein_coding	5000	184	36.0437
121422	3	114650000	114655000	YBX1P3'	'YBX1P3';'ZBTB20'	noncoding_pseudogene;protein_coding	121423	3	114655000	114660000		'ZBTB20'	protein_coding	5000	62	6.60127
121449	3	114785000	114790000	ZBTB20'	'ZBTB20'	protein_coding	121450	3	114790000	114795000	ZBTB20'	'ZBTB20'	protein_coding	5000	71	8.44097
122282	3	118950000	118955000	B4GALT4'	'B4GALT4';'B4GALT4-AS1'	noncoding_lncRNA_intergenic;protein_coding	122283	3	118955000	118960000	B4GALT4'	'B4GALT4';'B4GALT4-AS1';'CATG00000061501.1'	noncoding_lncRNA_divergent;noncoding_lncRNA_intergenic;protein_coding	5000	75	9.60211
122333	3	119205000	119210000	POGLUT1'	'POGLUT1'	protein_coding	122335	3	119215000	119220000	RP11-190C22.8';TIMMDC1'	'RP11-190C22.8';'TIMMDC1'	noncoding_lncRNA_divergent;protein_coding	10000	18	5.9779
122362	3	119350000	119355000	RP11-190C22.1'	'PLA1A';'POPDC2';'RP11-190C22.1'	noncoding_pseudogene;protein_coding	122363	3	119355000	119360000	RP11-190C22.1'	'COX17';'PLA1A';'POPDC2';'RP11-190C22.1'	noncoding_pseudogene;protein_coding	5000	70	9.37021
122369	3	119385000	119390000	POPDC2'	'CATG00000061512.1';'COX17';'POPDC2'	noncoding_lncRNA_noncoding_antisense;protein_coding	122370	3	119390000	119395000	COX17'	'COX17';'POPDC2'	protein_coding	5000	182	33.1815
122410	3	119590000	119595000	GSK3B'	'GSK3B'	protein_coding	122407	3	119575000	119580000		'CATG00000065842.1';'GSK3B'	noncoding_lncRNA_noncoding_sense_intronic;protein_coding	15000	22	16.8336
122411	3	119595000	119600000	GSK3B'	'GSK3B'	protein_coding	122412	3	119600000	119605000		'GSK3B'	protein_coding	5000	146	22.0286
122443	3	119755000	119760000	RP11-767L7.2'	'GSK3B'	protein_coding	122445	3	119765000	119770000		'CATG00000065870.1';'CATG00000065871.1';'GSK3B'	noncoding_sense_overlap_RNA;protein_coding	10000	19	8.37821
122454	3	119810000	119815000	GSK3B';RP11-18H7.1'	'GSK3B';'RP11-18H7.1'	noncoding_lncRNA_divergent;protein_coding	122453	3	119805000	119810000		'GSK3B'	protein_coding	5000	130	35.3505
122515	3	120115000	120120000	FSTL1'	'FSTL1';'RP11-174O3.3'	noncoding_lncRNA_divergent;protein_coding	122514	3	120110000	120115000		'FSTL1';'RP11-174O3.3'	noncoding_lncRNA_divergent;protein_coding	5000	164	27.8286
122525	3	120165000	120170000	FSTL1'	'CATG00000061517.1';'CATG00000061518.1';'FSTL1'	noncoding_lncRNA_divergent;noncoding_lncRNA_intergenic;protein_coding	122524	3	120160000	120165000		'FSTL1'	protein_coding	5000	159	30.6569
122538	3	120230000	120235000	RP11-359H3.1'	'CATG00000061517.1';'CATG00000065895.1';'FSTL1';'RP11-359H3.1'	noncoding_lncRNA_intergenic;noncoding_pseudogene;protein_coding	122534	3	120210000	120215000		'CATG00000061517.1';'CATG00000061521.1';'CATG00000065895.1';'FSTL1'	noncoding_lncRNA_intergenic;noncoding_lncRNA_noncoding_sense_intronic;protein_coding	20000	8	5.53966
122538	3	120230000	120235000	RP11-359H3.1'	'CATG00000061517.1';'CATG00000065895.1';'FSTL1';'RP11-359H3.1'	noncoding_lncRNA_intergenic;noncoding_pseudogene;protein_coding	122536	3	120220000	120225000		'CATG00000061517.1';'CATG00000065895.1';'FSTL1'	noncoding_lncRNA_intergenic;protein_coding	10000	20	7.02497
122555	3	120315000	120320000	NDUFB4'	'FSTL1';'NDUFB4'	protein_coding	122553	3	120305000	120310000		'FSTL1'	protein_coding	10000	32	12.7899
122571	3	120395000	120400000	HGD'	'HGD'	protein_coding	122574	3	120410000	120415000		'RABL3'	protein_coding	15000	8	5.17131
122577	3	120425000	120430000	RABL3'	'RABL3'	protein_coding	122576	3	120420000	120425000		'RABL3'	protein_coding	5000	184	30.8125
122596	3	120520000	120525000	NAP1L1P3'	'NAP1L1P3'	noncoding_pseudogene	122595	3	120515000	120520000				5000	95	15.3131
122617	3	120625000	120630000	STXBP5L'	'CATG00000065905.1';'STXBP5L'	protein_coding	122620	3	120640000	120645000	RP11-500K19.2'	'RP11-500K19.2';'STXBP5L'	noncoding_pseudogene;protein_coding	15000	18	12.8693
122620	3	120640000	120645000	RP11-500K19.2'	'RP11-500K19.2';'STXBP5L'	noncoding_pseudogene;protein_coding	122622	3	120650000	120655000		'STXBP5L'	protein_coding	10000	23	8.91357
122655	3	120815000	120820000	RP11-678L1.1'	'RP11-678L1.1';'STXBP5L'	noncoding_pseudogene;protein_coding	122654	3	120810000	120815000		'STXBP5L'	protein_coding	5000	85	13.4786
122655	3	120815000	120820000	RP11-678L1.1'	'RP11-678L1.1';'STXBP5L'	noncoding_pseudogene;protein_coding	122657	3	120825000	120830000		'STXBP5L'	protein_coding	10000	29	11.5659
122732	3	121200000	121205000	POLQ'	'POLQ'	protein_coding	122736	3	121220000	121225000		'POLQ'	protein_coding	20000	9	7.52528
122734	3	121210000	121215000	RPL7AP11'	'POLQ';'RPL7AP11'	noncoding_pseudogene;protein_coding	122736	3	121220000	121225000		'POLQ'	protein_coding	10000	18	8.36624
122768	3	121380000	121385000	HCLS1'	'GOLGB1'	protein_coding	122769	3	121385000	121390000		'GOLGB1'	protein_coding	5000	142	28.4637
122803	3	121555000	121560000	EAF2'	'EAF2'	protein_coding	122804	3	121560000	121565000		'EAF2'	protein_coding	5000	72	7.17982
122823	3	121655000	121660000	SLC15A2'	'CATG00000061554.1';'SLC15A2'	noncoding_lncRNA_intergenic;protein_coding	122824	3	121660000	121665000		'CATG00000061554.1';'SLC15A2'	noncoding_lncRNA_intergenic;protein_coding	5000	57	8.33048
122846	3	121770000	121775000	CD86'	'CD86';'ILDR1'	protein_coding	122847	3	121775000	121780000	CD86'	'CD86';'ILDR1'	protein_coding	5000	84	12.3849
122872	3	121900000	121905000	CASR'	'CASR'	protein_coding	122873	3	121905000	121910000		'CASR'	protein_coding	5000	68	6.22332
122884	3	121960000	121965000	SNORD112'	'CASR';'SNORD112'	noncoding_snoRNA;protein_coding	122886	3	121970000	121975000	CASR'	'CASR'	protein_coding	10000	48	20.741
122908	3	122080000	122085000	CCDC58'	'CCDC58'	protein_coding	122909	3	122085000	122090000	CCDC58'	'CCDC58'	protein_coding	5000	88	12.5866
122912	3	122100000	122105000	CCDC58';FAM162A'	'CCDC58';'FAM162A'	protein_coding	122914	3	122110000	122115000		'FAM162A'	protein_coding	10000	17	7.80057
122918	3	122130000	122135000	RP11-299J3.6';RP11-299J3.8';WDR5B'	'FAM162A';'WDR5B'	protein_coding	122919	3	122135000	122140000	RP11-299J3.6';RP11-299J3.8'	'KPNA1';'RP11-299J3.6';'RP11-299J3.8'	noncoding_lncRNA_divergent;noncoding_pseudogene;protein_coding	5000	66	11.5347
122927	3	122175000	122180000	KPNA1'	'KPNA1'	protein_coding	122925	3	122165000	122170000		'KPNA1'	protein_coding	10000	29	11.5231
122951	3	122295000	122300000	PARP15'	'CATG00000065946.1';'PARP15'	noncoding_lncRNA_divergent;protein_coding	122950	3	122290000	122295000		'DTX3L'	protein_coding	5000	101	15.5766
122960	3	122340000	122345000	PARP15'	'PARP15'	protein_coding	122965	3	122365000	122370000		'CATG00000065948.1'	noncoding_lncRNA_intergenic	25000	8	6.82545
123053	3	122805000	122810000	PDIA5'	'PDIA5'	protein_coding	123051	3	122795000	122800000		'PDIA5'	protein_coding	10000	16	5.38262
123091	3	122995000	123000000	RP11-797D24.3'	'ADCY5';'RP11-797D24.3';'SEC22A'	noncoding_lncRNA_lincRNA;protein_coding	123092	3	123000000	123005000	ADCY5';RP11-797D24.4'	'ADCY5';'RP11-797D24.4'	noncoding_antisense;protein_coding	5000	72	9.3595
123092	3	123000000	123005000	ADCY5';RP11-797D24.4'	'ADCY5';'RP11-797D24.4'	noncoding_antisense;protein_coding	123093	3	123005000	123010000	ADCY5'	'ADCY5'	protein_coding	5000	46	5.60851
12312	1	61555000	61560000	NFIA'	'CATG00000002663.1';'NFIA'	noncoding_lncRNA_noncoding_sense_intronic;protein_coding	12319	1	61590000	61595000	RP4-802A10.1'	'CATG00000002663.1';'NFIA';'RP4-802A10.1'	noncoding_lncRNA_noncoding_sense_intronic;noncoding_sense_intronic;protein_coding	35000	5	5.14263
123159	3	123335000	123340000	MYLK'	'MYLK';'MYLK-AS1'	noncoding_lncRNA_divergent;protein_coding	123161	3	123345000	123350000		'MYLK';'MYLK-AS1'	noncoding_lncRNA_divergent;protein_coding	10000	17	5.65593
12319	1	61590000	61595000	RP4-802A10.1'	'CATG00000002663.1';'NFIA';'RP4-802A10.1'	noncoding_lncRNA_noncoding_sense_intronic;noncoding_sense_intronic;protein_coding	12317	1	61580000	61585000		'CATG00000002663.1';'CATG00000002664.1';'NFIA'	noncoding_lncRNA_noncoding_sense_intronic;protein_coding	10000	27	12.7495
12319	1	61590000	61595000	RP4-802A10.1'	'CATG00000002663.1';'NFIA';'RP4-802A10.1'	noncoding_lncRNA_noncoding_sense_intronic;noncoding_sense_intronic;protein_coding	12320	1	61595000	61600000		'CATG00000002663.1';'NFIA'	noncoding_lncRNA_noncoding_sense_intronic;protein_coding	5000	98	14.7959
123195	3	123515000	123520000	MYLK'	'MYLK'	protein_coding	123192	3	123500000	123505000		'MYLK'	protein_coding	15000	30	23.3065
123224	3	123660000	123665000	CCDC14'	'CCDC14'	protein_coding	123226	3	123670000	123675000	CCDC14'	'CCDC14'	protein_coding	10000	39	20.4027
123226	3	123670000	123675000	CCDC14'	'CCDC14'	protein_coding	123227	3	123675000	123680000	CCDC14'	'CCDC14'	protein_coding	5000	47	4.71686
123363	3	124355000	124360000	KALRN'	'KALRN'	protein_coding	123364	3	124360000	124365000		'KALRN'	protein_coding	5000	56	5.55181
123416	3	124620000	124625000	ITGB5'	'ITGB5';'MUC13'	protein_coding	123393	3	124505000	124510000		'ITGB5';'ITGB5-AS1'	noncoding_antisense;protein_coding	115000	5	6.31972
123399	3	124535000	124540000	ITGB5'	'CATG00000061615.1';'ITGB5'	protein_coding;uncertain_coding	123398	3	124530000	124535000		'ITGB5'	protein_coding	5000	53	4.75467
123399	3	124535000	124540000	ITGB5'	'CATG00000061615.1';'ITGB5'	protein_coding;uncertain_coding	123402	3	124550000	124555000	ITGB5'	'ITGB5'	protein_coding	15000	11	6.13076
123399	3	124535000	124540000	ITGB5'	'CATG00000061615.1';'ITGB5'	protein_coding;uncertain_coding	123403	3	124555000	124560000	ITGB5'	'ITGB5'	protein_coding	20000	8	5.10323
123402	3	124550000	124555000	ITGB5'	'ITGB5'	protein_coding	123403	3	124555000	124560000	ITGB5'	'ITGB5'	protein_coding	5000	67	10.2249
123407	3	124575000	124580000	ENO1P3'	'ITGB5'	protein_coding	123408	3	124580000	124585000	ENO1P3'	'ENO1P3';'ITGB5'	noncoding_pseudogene;protein_coding	5000	60	6.59016
12345	1	61720000	61725000	RP5-833A20.1'	'NFIA'	protein_coding	12342	1	61705000	61710000		'NFIA'	protein_coding	15000	9	4.69613
123429	3	124685000	124690000	HEG1'	'HEG1'	protein_coding	123430	3	124690000	124695000	HEG1'	'HEG1'	protein_coding	5000	51	5.36926
123457	3	124825000	124830000	SLC12A8'	'SLC12A8'	protein_coding	123458	3	124830000	124835000	SLC12A8'	'SLC12A8'	protein_coding	5000	81	12.8297
123506	3	125070000	125075000	ZNF148'	'ZNF148'	protein_coding	123502	3	125050000	125055000		'ZNF148'	protein_coding	20000	7	4.67326
123507	3	125075000	125080000	ZNF148'	'ZNF148'	protein_coding	123509	3	125085000	125090000		'ZNF148'	protein_coding	10000	38	18.7903
123510	3	125090000	125095000	ZNF148'	'CATG00000061630.1';'ZNF148'	noncoding_lncRNA_divergent;protein_coding	123511	3	125095000	125100000		'CATG00000061630.1'	noncoding_lncRNA_divergent	5000	56	6.44521
123513	3	125105000	125110000	RNU6-232P'	'RNU6-232P'	noncoding_snRNA	123514	3	125110000	125115000				5000	164	29.1294
123528	3	125180000	125185000	SNX4'	'SNX4'	protein_coding	123529	3	125185000	125190000		'SNX4'	protein_coding	5000	79	11.5013
123598	3	125530000	125535000	RP11-379B18.3'	'RP11-379B18.3';'RP11-666A20.4'	noncoding_lncRNA_intergenic;noncoding_pseudogene	123602	3	125550000	125555000	AC092902.1'	'AC092902.1';'RP11-379B18.5';'RP11-666A20.4'	noncoding_lncRNA_intergenic;noncoding_lncRNA_lincRNA;noncoding_miRNA	20000	9	6.23567
123655	3	125815000	125820000	SLC41A3'	'RP11-124N2.1';'SLC41A3'	noncoding_lncRNA_divergent;protein_coding	123656	3	125820000	125825000	ALDH1L1-AS1';SLC41A3'	'ALDH1L1';'ALDH1L1-AS1';'SLC41A3'	noncoding_antisense;protein_coding	5000	45	4.68893
123781	3	126445000	126450000	CHCHD6'	'CHCHD6'	protein_coding	123782	3	126450000	126455000	CHCHD6'	'CHCHD6'	protein_coding	5000	56	5.57593
123953	3	127305000	127310000	TPRA1'	'MCM2';'TPRA1'	protein_coding	123952	3	127300000	127305000		'TPRA1'	protein_coding	5000	96	20.0109
123956	3	127320000	127325000	MCM2'	'MCM2'	protein_coding	123957	3	127325000	127330000		'MCM2'	protein_coding	5000	154	25.7859
123958	3	127330000	127335000	MCM2'	'MCM2'	protein_coding	123957	3	127325000	127330000		'MCM2'	protein_coding	5000	128	21.3434
123959	3	127335000	127340000	MCM2'	'CATG00000066020.1';'MCM2'	noncoding_lncRNA_divergent;protein_coding	123961	3	127345000	127350000	PODXL2'	'CATG00000066020.1';'PODXL2'	noncoding_lncRNA_divergent;protein_coding	10000	47	23.8303
123982	3	127450000	127455000	MGLL'	'MGLL'	protein_coding	123983	3	127455000	127460000	MGLL'	'MGLL'	protein_coding	5000	65	7.98015
124049	3	127785000	127790000	SEC61A1'	'RUVBL1';'SEC61A1'	protein_coding	124051	3	127795000	127800000	RUVBL1';RUVBL1-AS1'	'RUVBL1';'RUVBL1-AS1'	noncoding_lncRNA_noncoding_antisense;protein_coding	10000	24	11.8289
124053	3	127805000	127810000	RUVBL1'	'RUVBL1'	protein_coding	124054	3	127810000	127815000		'RUVBL1'	protein_coding	5000	215	36.7368
124064	3	127860000	127865000	RNU6-823P'	'CATG00000066038.1';'RNU6-823P';'RUVBL1'	noncoding_snRNA;protein_coding	124066	3	127870000	127875000	EEFSEC';RUVBL1'	'CATG00000066038.1';'EEFSEC';'RUVBL1'	protein_coding	10000	33	15.451
124102	3	128050000	128055000	EEFSEC'	'EEFSEC'	protein_coding	124099	3	128035000	128040000		'EEFSEC'	protein_coding	15000	9	6.06063
124103	3	128055000	128060000	EEFSEC'	'EEFSEC'	protein_coding	124105	3	128065000	128070000		'EEFSEC'	protein_coding	10000	14	5.68511
124108	3	128080000	128085000	MIR1280'	'EEFSEC';'MIR1280'	noncoding_miRNA;protein_coding	124109	3	128085000	128090000		'EEFSEC'	protein_coding	5000	60	6.9272
124131	3	128195000	128200000	GATA2'	'GATA2'	protein_coding	124132	3	128200000	128205000	GATA2'	'GATA2'	protein_coding	5000	116	18.2617
124161	3	128345000	128350000	RPN1'	'RPN1'	protein_coding	124159	3	128335000	128340000		'CATG00000061730.1';'RPN1'	protein_coding	10000	24	11.5642
124185	3	128465000	128470000	MARK2P8'	'CATG00000061735.1';'MARK2P8';'RAB7A'	noncoding_pseudogene;protein_coding	124182	3	128450000	128455000		'CATG00000061734.1';'RAB7A'	noncoding_lncRNA_noncoding_sense_intronic;protein_coding	15000	10	6.8637
124194	3	128510000	128515000	RAB7A'	'RAB7A'	protein_coding	124193	3	128505000	128510000		'RAB7A'	protein_coding	5000	322	36.7368
12420	1	62095000	62100000	AC099791.1'			12421	1	62100000	62105000		'CATG00000060369.1'	noncoding_lncRNA_intergenic	5000	77	9.15492
124210	3	128590000	128595000	RP11-723O4.2'	'CATG00000066059.1';'RP11-723O4.2'	noncoding_antisense;uncertain_coding	124211	3	128595000	128600000	ACAD9'	'ACAD9';'CATG00000066059.1'	protein_coding;uncertain_coding	5000	114	20.0931
124245	3	128765000	128770000	RP11-434H6.2'	'KIAA1257';'RP11-434H6.2'	noncoding_pseudogene;protein_coding	124246	3	128770000	128775000		'KIAA1257'	protein_coding	5000	51	6.46572
124259	3	128835000	128840000	RAB43'	'ISY1-RAB43';'RAB43'	protein_coding	124258	3	128830000	128835000		'ISY1-RAB43';'RAB43'	protein_coding	5000	51	7.68104
12430	1	62145000	62150000	TM2D1'	'TM2D1'	protein_coding	12432	1	62155000	62160000		'TM2D1'	protein_coding	10000	16	5.82307
124319	3	129135000	129140000	EFCAB12'	'EFCAB12'	protein_coding	124320	3	129140000	129145000	EFCAB12'	'EFCAB12'	protein_coding	5000	46	4.9677
12433	1	62160000	62165000	TM2D1'	'TM2D1'	protein_coding	12432	1	62155000	62160000		'TM2D1'	protein_coding	5000	130	28.7551
124320	3	129140000	129145000	EFCAB12'	'EFCAB12'	protein_coding	124321	3	129145000	129150000	EFCAB12'	'EFCAB12';'MBD4'	protein_coding	5000	54	7.3542
124321	3	129145000	129150000	EFCAB12'	'EFCAB12';'MBD4'	protein_coding	124323	3	129155000	129160000	IFT122';MBD4'	'IFT122';'MBD4'	protein_coding	10000	12	4.7151
124416	3	129620000	129625000	TMCC1-AS1'	'TMCC1-AS1'	noncoding_lncRNA_divergent	124417	3	129625000	129630000		'TMCC1-AS1'	noncoding_lncRNA_divergent	5000	68	7.11665
124584	3	130460000	130465000	PIK3R4'	'PIK3R4'	protein_coding	124585	3	130465000	130470000	PIK3R4'	'CATG00000061817.1';'PIK3R4'	noncoding_lncRNA_divergent;protein_coding	5000	74	10.9842
124597	3	130525000	130530000	RN7SKP212'	'CATG00000061819.1'	noncoding_lncRNA_intergenic	124596	3	130520000	130525000		'CATG00000061819.1'	noncoding_lncRNA_intergenic	5000	73	9.31487
124598	3	130530000	130535000	RN7SKP212'	'CATG00000061819.1';'CATG00000066101.1';'RN7SKP212'	noncoding_lncRNA_intergenic;noncoding_misc_RNA	124602	3	130550000	130555000		'CATG00000061819.1'	noncoding_lncRNA_intergenic	20000	6	4.60486
124618	3	130630000	130635000	Y_RNA'	'ATP2C1';'RP11-39E3.3';'Y_RNA'	noncoding_lncRNA_divergent;noncoding_misc_RNA;protein_coding	124616	3	130620000	130625000		'ATP2C1';'RP11-39E3.3'	noncoding_lncRNA_divergent;protein_coding	10000	17	5.98688
124707	3	131075000	131080000	NUDT16P1';RP11-933H2.4'	'RP11-933H2.4'	noncoding_lncRNA_divergent	124708	3	131080000	131085000	NUDT16P1';RP11-933H2.4'	'NUDT16P';'RP11-933H2.4'	noncoding_lncRNA_divergent;noncoding_pseudogene	5000	61	6.1993
124780	3	131440000	131445000	CPNE4'	'CPNE4'	protein_coding	124778	3	131430000	131435000		'CPNE4'	protein_coding	10000	22	9.90375
124842	3	131750000	131755000	CPNE4'	'CPNE4'	protein_coding	124841	3	131745000	131750000		'CPNE4'	protein_coding	5000	72	7.32164
124871	3	131895000	131900000	RP11-64K7.1'	'CPNE4';'RP11-64K7.1'	noncoding_pseudogene;protein_coding	124872	3	131900000	131905000		'CPNE4'	protein_coding	5000	58	4.99007
12488	1	62435000	62440000	INADL'	'INADL'	protein_coding	12489	1	62440000	62445000	INADL'	'INADL'	protein_coding	5000	376	36.7368
124884	3	131960000	131965000	RPL7P16'	'CPNE4';'RP11-250B16.1'	noncoding_pseudogene;protein_coding	124883	3	131955000	131960000		'CPNE4'	protein_coding	5000	101	14.2782
124884	3	131960000	131965000	RPL7P16'	'CPNE4';'RP11-250B16.1'	noncoding_pseudogene;protein_coding	124885	3	131965000	131970000		'CPNE4';'RP11-250B16.1'	noncoding_pseudogene;protein_coding	5000	60	5.10295
124891	3	131995000	132000000	snoU13'	'CPNE4';'snoU13'	noncoding_snoRNA;protein_coding	124889	3	131985000	131990000		'CPNE4'	protein_coding	10000	54	34.945
124891	3	131995000	132000000	snoU13'	'CPNE4';'snoU13'	noncoding_snoRNA;protein_coding	124892	3	132000000	132005000	CPNE4';snoU13'	'CPNE4'	protein_coding	5000	100	16.3771
124901	3	132045000	132050000	ACPP'	'ACPP'	protein_coding	124905	3	132065000	132070000		'ACPP'	protein_coding	20000	12	9.73923
124906	3	132070000	132075000	ACPP'	'ACPP'	protein_coding	124905	3	132065000	132070000		'ACPP'	protein_coding	5000	105	13.6105
124915	3	132115000	132120000	NIP7P2'	'DNAJC13'	protein_coding	124916	3	132120000	132125000	NIP7P2'	'DNAJC13';'NIP7P2'	noncoding_pseudogene;protein_coding	5000	68	6.36676
124916	3	132120000	132125000	NIP7P2'	'DNAJC13';'NIP7P2'	noncoding_pseudogene;protein_coding	124919	3	132135000	132140000	DNAJC13'	'CATG00000066122.1';'DNAJC13'	noncoding_lncRNA_divergent;protein_coding	15000	16	11.2872
124927	3	132175000	132180000	DNAJC13'	'DNAJC13'	protein_coding	124925	3	132165000	132170000		'DNAJC13'	protein_coding	10000	41	18.2836
124966	3	132370000	132375000	UBA5'	'ACAD11';'NPHP3';'UBA5'	protein_coding	124967	3	132375000	132380000	ACAD11';UBA5'	'ACAD11';'NPHP3';'UBA5'	protein_coding	5000	48	5.17235
124968	3	132380000	132385000	UBA5'	'ACAD11';'NPHP3';'UBA5'	protein_coding	124969	3	132385000	132390000	UBA5'	'ACAD11';'NPHP3';'UBA5'	protein_coding	5000	48	5.01653
124969	3	132385000	132390000	UBA5'	'ACAD11';'NPHP3';'UBA5'	protein_coding	124970	3	132390000	132395000	UBA5'	'ACAD11';'NPHP3';'UBA5'	protein_coding	5000	54	6.45555
124978	3	132430000	132435000	NPHP3'	'NPHP3'	protein_coding	124980	3	132440000	132445000	NPHP3';NPHP3-AS1'	'CATG00000061847.1';'NPHP3';'NPHP3-AS1'	noncoding_lncRNA_divergent;protein_coding	10000	21	9.10487
124980	3	132440000	132445000	NPHP3';NPHP3-AS1'	'CATG00000061847.1';'NPHP3';'NPHP3-AS1'	noncoding_lncRNA_divergent;protein_coding	124982	3	132450000	132455000		'NPHP3-AS1'	noncoding_lncRNA_divergent	10000	33	13.7134
125144	3	133260000	133265000	RP11-91K8.2';RP11-91K8.5'	'CATG00000061870.1';'CATG00000066148.1';'RP11-91K8.2';'RP11-91K8.5'	noncoding_lncRNA_intergenic;noncoding_lncRNA_lincRNA;noncoding_pseudogene;uncertain_coding	125143	3	133255000	133260000				5000	85	13.6084
125146	3	133270000	133275000	SNORA33'	'CATG00000066148.1';'SNORA33'	noncoding_snoRNA;uncertain_coding	125181	3	133445000	133450000		'TFP1'	noncoding_pseudogene	175000	5	7.5243
125167	3	133375000	133380000	TFP1';TOPBP1'	'TOPBP1'	protein_coding	125168	3	133380000	133385000	RNU6-678P';TFP1';TOPBP1'	'RNU6-678P';'TFP1';'TOPBP1'	noncoding_pseudogene;noncoding_snRNA;protein_coding	5000	106	22.6667
137479	3	194935000	194940000	RNU6-25P'	'ACAP2';'RNU6-25P';'XXYLT1'	noncoding_snRNA;protein_coding	125181	3	133445000	133450000		'TFP1'	noncoding_pseudogene	61490000	6	11.4763
1252	1	6255000	6260000	RPL22'	'RPL22'	protein_coding	1253	1	6260000	6265000	RNF207';RP1-120G22.11';RPL22'	'RP1-120G22.11';'RPL22'	noncoding_lncRNA_divergent;protein_coding	5000	123	28.7817
125277	3	133925000	133930000	RYK'	'RYK'	protein_coding	125278	3	133930000	133935000		'RYK'	protein_coding	5000	61	5.6625
125285	3	133965000	133970000	RYK'	'CATG00000061884.1';'RYK'	noncoding_lncRNA_divergent;protein_coding	125284	3	133960000	133965000		'RYK'	protein_coding	5000	56	6.53699
125285	3	133965000	133970000	RYK'	'CATG00000061884.1';'RYK'	noncoding_lncRNA_divergent;protein_coding	125286	3	133970000	133975000	RYK'	'CATG00000061884.1'	noncoding_lncRNA_divergent	5000	199	36.7368
125308	3	134080000	134085000	AMOTL2'	'AMOTL2'	protein_coding	125310	3	134090000	134095000	AMOTL2'	'AMOTL2';'CATG00000061891.1'	noncoding_lncRNA_divergent;protein_coding	10000	13	4.74205
125359	3	134335000	134340000	EPHB1'	'EPHB1';'KY'	protein_coding	125361	3	134345000	134350000	KY'	'EPHB1';'KY'	protein_coding	10000	34	14.8213
1255	1	6270000	6275000	RNF207';RPL22'	'RNF207'	protein_coding	1257	1	6280000	6285000	ICMT'	'ICMT';'RNF207'	protein_coding	10000	17	6.90729
12553	1	62760000	62765000	RNU6-371P'	'KANK4';'RNU6-371P'	noncoding_snRNA;protein_coding	12554	1	62765000	62770000		'KANK4'	protein_coding	5000	102	21.9682
12558	1	62785000	62790000	KANK4'	'KANK4'	protein_coding	12554	1	62765000	62770000		'KANK4'	protein_coding	20000	13	12.7789
125627	3	135675000	135680000	RP11-305O4.1'	'MSL2';'RP11-305O4.1'	noncoding_pseudogene;protein_coding	125628	3	135680000	135685000	PPP2R3A'	'MSL2';'PPP2R3A'	protein_coding	5000	180	32.1935
125685	3	135965000	135970000	PCCB'	'CATG00000066195.1';'PCCB';'PPP2R3A'	noncoding_lncRNA_divergent;protein_coding	125683	3	135955000	135960000		'PPP2R3A'	protein_coding	10000	20	8.58346
125687	3	135975000	135980000	PCCB'	'PCCB';'PPP2R3A'	protein_coding	125683	3	135955000	135960000		'PPP2R3A'	protein_coding	20000	13	11.412
125786	3	136470000	136475000	RP11-102M11.2';STAG1'	'RP11-102M11.2';'STAG1'	noncoding_lncRNA_divergent;protein_coding	125785	3	136465000	136470000		'STAG1'	protein_coding	5000	40	5.58456
125799	3	136535000	136540000	SLC35G2'	'CATG00000066228.1';'SLC35G2'	noncoding_lncRNA_divergent;protein_coding	125796	3	136520000	136525000				15000	25	20.0463
125803	3	136555000	136560000	RP11-731C17.2'	'RP11-731C17.2';'RP11-85F14.5';'SLC35G2'	noncoding_antisense;noncoding_lncRNA_divergent;protein_coding	125807	3	136575000	136580000	RP11-85F14.5'	'RP11-85F14.5';'SLC35G2'	noncoding_lncRNA_divergent;protein_coding	20000	9	6.60531
125807	3	136575000	136580000	RP11-85F14.5'	'RP11-85F14.5';'SLC35G2'	noncoding_lncRNA_divergent;protein_coding	125809	3	136585000	136590000		'NCK1'	protein_coding	10000	23	9.1169
12589	1	62940000	62945000	DOCK7'	'DOCK7'	protein_coding	12588	1	62935000	62940000		'DOCK7'	protein_coding	5000	367	36.7368
126093	3	138005000	138010000	ARMC8'	'ARMC8';'NME9'	protein_coding	126092	3	138000000	138005000		'ARMC8';'NME9'	protein_coding	5000	220	36.7368
126129	3	138185000	138190000	ESYT3'	'ESYT3'	protein_coding	126130	3	138190000	138195000	ESYT3'	'ESYT3'	protein_coding	5000	218	36.7368
126130	3	138190000	138195000	ESYT3'	'ESYT3'	protein_coding	126131	3	138195000	138200000		'ESYT3'	protein_coding	5000	57	7.37638
126153	3	138305000	138310000	CEP70'	'CEP70'	protein_coding	126155	3	138315000	138320000				10000	25	8.96417
126172	3	138400000	138405000	PIK3CB'	'PIK3CB'	protein_coding	126174	3	138410000	138415000		'PIK3CB'	protein_coding	10000	25	10.8089
126194	3	138510000	138515000	RPL23AP40'	'PIK3CB'	protein_coding	126192	3	138500000	138505000		'PIK3CB'	protein_coding	10000	32	15.666
126516	3	140120000	140125000	AC092988.1'	'AC092988.1';'CLSTN2'	noncoding_miRNA;protein_coding	126513	3	140105000	140110000		'CLSTN2'	protein_coding	15000	11	5.17035
126528	3	140180000	140185000	RP11-68L1.1';RP11-68L1.2'	'CLSTN2';'RP11-68L1.1'	noncoding_antisense;protein_coding	126529	3	140185000	140190000		'CLSTN2'	protein_coding	5000	63	6.10336
126608	3	140580000	140585000	RP11-691G17.1'	'CATG00000066304.1';'RP11-691G17.1'	noncoding_lncRNA_divergent;noncoding_lncRNA_lincRNA	126607	3	140575000	140580000		'CATG00000066304.1'	noncoding_lncRNA_divergent	5000	83	12.4414
126616	3	140620000	140625000	RP11-4H14.1'	'CATG00000066304.1';'RP11-4H14.1'	noncoding_lncRNA_divergent;noncoding_pseudogene	126615	3	140615000	140620000		'CATG00000066304.1'	noncoding_lncRNA_divergent	5000	54	7.6488
126623	3	140655000	140660000	SLC25A36'	'CATG00000066304.1'	noncoding_lncRNA_divergent	126619	3	140635000	140640000		'CATG00000066304.1'	noncoding_lncRNA_divergent	20000	7	4.77855
126623	3	140655000	140660000	SLC25A36'	'CATG00000066304.1'	noncoding_lncRNA_divergent	126624	3	140660000	140665000	SLC25A36'	'CATG00000066304.1';'SLC25A36'	noncoding_lncRNA_divergent;protein_coding	5000	84	11.2169
126624	3	140660000	140665000	SLC25A36'	'CATG00000066304.1';'SLC25A36'	noncoding_lncRNA_divergent;protein_coding	126625	3	140665000	140670000		'SLC25A36'	protein_coding	5000	137	27.039
126627	3	140675000	140680000	SLC25A36'	'SLC25A36'	protein_coding	126625	3	140665000	140670000		'SLC25A36'	protein_coding	10000	20	8.50066
126648	3	140780000	140785000	SPSB4'	'CATG00000066309.1';'SPSB4'	noncoding_lncRNA_divergent;protein_coding	126651	3	140795000	140800000	SPSB4'	'SPSB4'	protein_coding	15000	13	6.4404
126649	3	140785000	140790000	SPSB4'	'CATG00000066309.1';'SPSB4'	noncoding_lncRNA_divergent;protein_coding	126651	3	140795000	140800000	SPSB4'	'SPSB4'	protein_coding	10000	34	15.4092
126681	3	140945000	140950000	ACPL2'	'CATG00000066310.1'	noncoding_lncRNA_divergent	126683	3	140955000	140960000		'ACPL2'	protein_coding	10000	31	12.9325
126687	3	140975000	140980000	ACPL2';RP11-764I5.1'	'ACPL2';'RP11-764I5.1'	noncoding_pseudogene;protein_coding	126683	3	140955000	140960000		'ACPL2'	protein_coding	20000	10	6.61334
126708	3	141080000	141085000	RP11-438D8.2'	'RP11-438D8.2';'ZBTB38'	noncoding_lncRNA_divergent;protein_coding	126709	3	141085000	141090000	RP11-438D8.2';ZBTB38'	'CATG00000066312.1';'RP11-438D8.2';'ZBTB38'	noncoding_lncRNA_divergent;protein_coding	5000	62	6.58279
126709	3	141085000	141090000	RP11-438D8.2';ZBTB38'	'CATG00000066312.1';'RP11-438D8.2';'ZBTB38'	noncoding_lncRNA_divergent;protein_coding	126710	3	141090000	141095000		'ZBTB38'	protein_coding	5000	64	8.46935
126709	3	141085000	141090000	RP11-438D8.2';ZBTB38'	'CATG00000066312.1';'RP11-438D8.2';'ZBTB38'	noncoding_lncRNA_divergent;protein_coding	126711	3	141095000	141100000		'ZBTB38'	protein_coding	10000	20	6.47198
126713	3	141105000	141110000	ZBTB38'	'CATG00000066314.1';'ZBTB38'	noncoding_lncRNA_divergent;protein_coding	126711	3	141095000	141100000		'ZBTB38'	protein_coding	10000	36	17.8844
126716	3	141120000	141125000	ZBTB38'	'ZBTB38'	protein_coding	126717	3	141125000	141130000		'ZBTB38'	protein_coding	5000	135	26.628
126720	3	141140000	141145000	ZBTB38'	'ZBTB38'	protein_coding	126718	3	141130000	141135000		'ZBTB38'	protein_coding	10000	27	14.261
126722	3	141150000	141155000	ZBTB38'	'ZBTB38'	protein_coding	126718	3	141130000	141135000		'ZBTB38'	protein_coding	20000	7	5.08286
126910	3	142090000	142095000	XRN1'	'XRN1'	protein_coding	126908	3	142080000	142085000		'XRN1'	protein_coding	10000	26	10.9247
126923	3	142155000	142160000	AC109992.1'	'XRN1'	protein_coding	126924	3	142160000	142165000	AC109992.1'	'AC109992.1';'XRN1'	noncoding_pseudogene;protein_coding	5000	168	32.0547
126952	3	142300000	142305000	RPL6P9'	'CATG00000062052.1';'RPL6P9'	noncoding_lncRNA_divergent;noncoding_pseudogene	126958	3	142330000	142335000		'PLS1'	protein_coding	30000	5	4.66204
127027	3	142675000	142680000	PAQR9';RP11-372E1.7'	'PAQR9';'RP11-372E1.7'	noncoding_pseudogene;protein_coding	127031	3	142695000	142700000		'RP11-372E1.6';'U2SURP'	noncoding_lncRNA_divergent;protein_coding	20000	6	4.74644
127098	3	143030000	143035000	RP13-635I23.3'	'RP13-635I23.3';'SLC9A9'	noncoding_sense_intronic;protein_coding	127096	3	143020000	143025000		'SLC9A9'	protein_coding	10000	43	22.7384
127159	3	143335000	143340000	RP11-501M7.1'	'RP11-501M7.1';'SLC9A9'	noncoding_pseudogene;protein_coding	127156	3	143320000	143325000		'CATG00000062083.1';'SLC9A9'	noncoding_lncRNA_noncoding_antisense;protein_coding	15000	37	27.8112
127207	3	143575000	143580000	RP11-8J23.1'			127208	3	143580000	143585000				5000	86	13.0498
12757	1	63780000	63785000	LINC00466'	'CATG00000002961.1';'LINC00466'	noncoding_lncRNA_intergenic	12758	1	63785000	63790000	FOXD3';RP4-792G4.2'	'CATG00000002961.1';'FOXD3';'RP4-792G4.2'	noncoding_lncRNA_divergent;noncoding_lncRNA_intergenic;protein_coding	5000	49	6.4456
12765	1	63820000	63825000	RP4-792G4.3'	'CATG00000060947.1'	noncoding_lncRNA_divergent	12766	1	63825000	63830000	RP4-792G4.3'	'CATG00000060947.1';'RP4-792G4.3'	noncoding_lncRNA_divergent;noncoding_pseudogene	5000	106	15.8313
127667	3	145875000	145880000	PLOD2'	'CATG00000062131.1';'PLOD2'	noncoding_lncRNA_divergent;protein_coding	127668	3	145880000	145885000	PLOD2'	'CATG00000062131.1';'PLOD2'	noncoding_lncRNA_divergent;protein_coding	5000	104	15.8232
127718	3	146130000	146135000	RP11-758I14.3'	'PLSCR2';'RP11-758I14.3'	noncoding_pseudogene;protein_coding	127719	3	146135000	146140000	RP11-758I14.3'	'PLSCR2'	protein_coding	5000	190	36.7368
12776	1	63875000	63880000	ALG6'	'ALG6'	protein_coding	12773	1	63860000	63865000		'ALG6'	protein_coding	15000	13	8.79783
127734	3	146210000	146215000	PLSCR2'	'PLSCR1';'PLSCR2'	protein_coding	127736	3	146220000	146225000		'PLSCR1'	protein_coding	10000	31	14.8812
127738	3	146230000	146235000	PLSCR1'	'PLSCR1'	protein_coding	127741	3	146245000	146250000	PLSCR1'	'PLSCR1'	protein_coding	15000	20	13.8033
12777	1	63880000	63885000	ALG6'	'ALG6'	protein_coding	12779	1	63890000	63895000	ALG6'	'ALG6'	protein_coding	10000	51	24.3148
12779	1	63890000	63895000	ALG6'	'ALG6'	protein_coding	12780	1	63895000	63900000		'ALG6'	protein_coding	5000	56	5.76082
12784	1	63915000	63920000	ITGB3BP'	'ALG6';'ITGB3BP'	protein_coding	12782	1	63905000	63910000		'ALG6';'ITGB3BP'	protein_coding	10000	34	16.638
12798	1	63985000	63990000	EFCAB7';ITGB3BP'	'EFCAB7';'ITGB3BP'	protein_coding	12799	1	63990000	63995000	EFCAB7';RN7SL488P'	'EFCAB7';'ITGB3BP'	protein_coding	5000	158	33.3695
12799	1	63990000	63995000	EFCAB7';RN7SL488P'	'EFCAB7';'ITGB3BP'	protein_coding	12800	1	63995000	64000000	EFCAB7';RN7SL488P'	'EFCAB7';'ITGB3BP';'RN7SL488P'	noncoding_misc_RNA;protein_coding	5000	90	9.49065
12800	1	63995000	64000000	EFCAB7';RN7SL488P'	'EFCAB7';'ITGB3BP';'RN7SL488P'	noncoding_misc_RNA;protein_coding	12801	1	64000000	64005000	EFCAB7';RNU7-123P'	'EFCAB7';'ITGB3BP';'RNU7-123P'	noncoding_snRNA;protein_coding	5000	225	36.7368
12801	1	64000000	64005000	EFCAB7';RNU7-123P'	'EFCAB7';'ITGB3BP';'RNU7-123P'	noncoding_snRNA;protein_coding	12803	1	64010000	64015000	DLEU2L';EFCAB7'	'DLEU2L';'EFCAB7';'ITGB3BP'	protein_coding	10000	23	7.83242
12803	1	64010000	64015000	DLEU2L';EFCAB7'	'DLEU2L';'EFCAB7';'ITGB3BP'	protein_coding	12804	1	64015000	64020000	DLEU2L';EFCAB7'	'DLEU2L';'EFCAB7';'ITGB3BP'	protein_coding	5000	69	9.93795
12804	1	64015000	64020000	DLEU2L';EFCAB7'	'DLEU2L';'EFCAB7';'ITGB3BP'	protein_coding	12805	1	64020000	64025000	EFCAB7'	'EFCAB7';'ITGB3BP'	protein_coding	5000	55	7.64103
128174	3	148410000	148415000	AGTR1';RPL38P1'	'RPL38P1'	noncoding_pseudogene	128171	3	148395000	148400000				15000	17	12.1821
128201	3	148545000	148550000	CPB1'	'CATG00000066442.1';'CPB1'	noncoding_lncRNA_noncoding_antisense;protein_coding	128199	3	148535000	148540000		'CPB1'	protein_coding	10000	30	13.6568
128227	3	148675000	148680000	RP11-680B3.2'	'CATG00000062168.1';'RP11-680B3.2'	noncoding_antisense;noncoding_lncRNA_intergenic	128226	3	148670000	148675000		'CATG00000062168.1';'RP11-680B3.2'	noncoding_antisense;noncoding_lncRNA_intergenic	5000	52	5.05669
12825	1	64120000	64125000	RN7SL130P'	'PGM1';'RN7SL130P'	noncoding_misc_RNA;protein_coding	12823	1	64110000	64115000		'PGM1'	protein_coding	10000	50	22.7446
128267	3	148875000	148880000	HPS3'	'HPS3'	protein_coding	128262	3	148850000	148855000		'HPS3'	protein_coding	25000	7	6.68997
128268	3	148880000	148885000	HPS3'	'CP';'HPS3'	protein_coding	128270	3	148890000	148895000	CP'	'CP';'HPS3'	protein_coding	10000	30	11.2537
128311	3	149095000	149100000	TM4SF1';TM4SF1-AS1'	'TM4SF1';'TM4SF1-AS1'	noncoding_lncRNA_intergenic;protein_coding	128309	3	149085000	149090000		'CATG00000062181.1';'TM4SF1'	noncoding_lncRNA_noncoding_antisense;protein_coding	10000	18	6.95988
128311	3	149095000	149100000	TM4SF1';TM4SF1-AS1'	'TM4SF1';'TM4SF1-AS1'	noncoding_lncRNA_intergenic;protein_coding	128312	3	149100000	149105000	RP11-278L15.2'	'RP11-278L15.2';'TM4SF1-AS1'	noncoding_lncRNA_intergenic	5000	76	13.0273
128344	3	149260000	149265000	WWTR1'	'WWTR1'	protein_coding	128342	3	149250000	149255000		'WWTR1'	protein_coding	10000	20	8.02213
128365	3	149365000	149370000	WWTR1-IT1'	'WWTR1';'WWTR1-IT1'	noncoding_sense_intronic;protein_coding	128364	3	149360000	149365000		'WWTR1'	protein_coding	5000	120	19.9768
128450	3	149790000	149795000	snoU13'	'RP11-167H9.4';'snoU13'	noncoding_lncRNA_intergenic	128447	3	149775000	149780000		'PFN2';'RP11-167H9.4';'RP11-63E16.1'	noncoding_lncRNA_intergenic;noncoding_pseudogene;protein_coding	15000	17	10.2172
128465	3	149865000	149870000	RPL32P9'	'RP11-167H9.4';'RPL32P9'	noncoding_lncRNA_intergenic;noncoding_pseudogene	128463	3	149855000	149860000		'RP11-167H9.4'	noncoding_lncRNA_intergenic	10000	24	9.64979
12848	1	64235000	64240000	ROR1'	'CATG00000061002.1';'ROR1'	noncoding_lncRNA_divergent;protein_coding	12849	1	64240000	64245000	ROR1'	'ROR1'	protein_coding	5000	49	6.00185
128492	3	150000000	150005000	RP11-483E7.1'	'CATG00000062208.1';'CATG00000066486.1';'RP11-483E7.1'	noncoding_lncRNA_intergenic;noncoding_lncRNA_lincRNA	128490	3	149990000	149995000		'CATG00000062208.1';'CATG00000066486.1';'RP11-483E7.1'	noncoding_lncRNA_intergenic;noncoding_lncRNA_lincRNA	10000	26	8.18328
128550	3	150290000	150295000	EIF2A'	'EIF2A';'SERP1';'TSC22D2'	protein_coding	128555	3	150315000	150320000	SELT';SERP1'	'EIF2A';'SERP1'	protein_coding	25000	6	5.33514
128556	3	150320000	150325000	SELT';SERP1'	'SELT';'SERP1'	protein_coding	128557	3	150325000	150330000	RP11-392O18.2'	'RP11-392O18.2';'SELT'	noncoding_pseudogene;protein_coding	5000	126	21.6596
128579	3	150435000	150440000	RP11-103G8.1'	'RP11-103G8.1';'RP11-103G8.2'	noncoding_lncRNA_divergent;noncoding_pseudogene	128587	3	150475000	150480000	SIAH2';SIAH2-AS1'	'SIAH2';'SIAH2-AS1'	noncoding_lncRNA_divergent;protein_coding	40000	5	5.63291
128613	3	150605000	150610000	FAM188B2';RP11-166N6.2'	'CLRN1';'CLRN1-AS1';'FAM188B2';'RP11-166N6.2';'RP11-166N6.3'	noncoding_lncRNA_divergent;noncoding_lncRNA_intergenic;protein_coding	128616	3	150620000	150625000	RP11-373I8.1'	'CLRN1';'CLRN1-AS1';'RP11-166N6.2';'RP11-166N6.3';'RP11-373I8.1'	noncoding_lncRNA_divergent;noncoding_lncRNA_intergenic;noncoding_lncRNA_lincRNA;protein_coding	15000	14	8.65829
12862	1	64305000	64310000	CFL1P3'	'CATG00000003053.1';'CFL1P3';'ROR1'	noncoding_lncRNA_noncoding_sense_intronic;noncoding_pseudogene;protein_coding	12863	1	64310000	64315000		'ROR1'	protein_coding	5000	61	6.33644
128762	3	151350000	151355000	AC069067.1';RP11-454C18.1'	'AC069067.1';'RP11-454C18.1'	noncoding_lncRNA_lincRNA;noncoding_miRNA	128761	3	151345000	151350000				5000	63	6.57955
128789	3	151485000	151490000	RP11-64D22.2'	'RP11-454C18.2';'RP11-64D22.2'	noncoding_lncRNA_divergent;noncoding_pseudogene	128794	3	151510000	151515000	RP11-64D22.5'	'RP11-454C18.2';'RP11-64D22.2';'RP11-64D22.5'	noncoding_lncRNA_divergent;noncoding_lncRNA_intergenic;noncoding_pseudogene	25000	6	5.70875
128895	3	152015000	152020000	MBNL1'	'CATG00000062263.1';'MBNL1'	noncoding_lncRNA_noncoding_sense_intronic;protein_coding	128894	3	152010000	152015000		'MBNL1'	protein_coding	5000	49	4.92019
128895	3	152015000	152020000	MBNL1'	'CATG00000062263.1';'MBNL1'	noncoding_lncRNA_noncoding_sense_intronic;protein_coding	128897	3	152025000	152030000		'CATG00000062264.1';'MBNL1'	noncoding_lncRNA_noncoding_sense_intronic;protein_coding	10000	23	10.634
128918	3	152130000	152135000	MBNL1'	'MBNL1'	protein_coding	128916	3	152120000	152125000		'MBNL1'	protein_coding	10000	48	28.6756
12900	1	64495000	64500000	RNU6-809P'	'ROR1'	protein_coding	12901	1	64500000	64505000		'ROR1'	protein_coding	5000	54	4.73216
129157	3	153325000	153330000	Y_RNA'	'RP11-23D24.2';'Y_RNA'	noncoding_lncRNA_intergenic;noncoding_misc_RNA	129154	3	153310000	153315000		'RP11-23D24.2'	noncoding_lncRNA_intergenic	15000	40	30.5714
129241	3	153745000	153750000	ARHGEF26-AS1'	'ARHGEF26-AS1'	noncoding_lncRNA_divergent	129242	3	153750000	153755000	ARHGEF26-AS1'	'ARHGEF26-AS1'	noncoding_lncRNA_divergent	5000	104	17.3424
129280	3	153940000	153945000	ARHGEF26'	'ARHGEF26'	protein_coding	129281	3	153945000	153950000		'ARHGEF26'	protein_coding	5000	61	10.0128
12936	1	64675000	64680000	UBE2U'	'UBE2U'	protein_coding	12930	1	64645000	64650000		'ROR1'	protein_coding	30000	8	7.79549
12936	1	64675000	64680000	UBE2U'	'UBE2U'	protein_coding	12931	1	64650000	64655000		'ROR1';'UBE2U'	protein_coding	25000	39	36.7368
129371	3	154395000	154400000	RPL9P15'	'CATG00000066558.1'	noncoding_lncRNA_intergenic	129372	3	154400000	154405000		'CATG00000066558.1'	noncoding_lncRNA_intergenic	5000	135	20.9582
129429	3	154685000	154690000	RP11-439C8.2'	'RP11-439C8.2'	noncoding_lncRNA_intergenic	129430	3	154690000	154695000				5000	152	28.0659
129451	3	154795000	154800000	MME'	'CATG00000066562.1';'MME'	noncoding_lncRNA_divergent;protein_coding	129452	3	154800000	154805000	MME'	'CATG00000066562.1';'MME'	noncoding_lncRNA_divergent;protein_coding	5000	193	36.7368
129472	3	154900000	154905000	MME-AS1'	'MME';'MME-AS1'	noncoding_antisense;protein_coding	129475	3	154915000	154920000				15000	37	30.2088
129483	3	154955000	154960000	RP11-451G4.1'	'RP11-451G4.1'	noncoding_lncRNA_intergenic	129482	3	154950000	154955000				5000	108	13.0757
129493	3	155005000	155010000	RP11-451G4.3'	'RP11-451G4.2';'RP11-451G4.3'	noncoding_lncRNA_intergenic;noncoding_lncRNA_lincRNA	129495	3	155015000	155020000				10000	22	8.47799
129493	3	155005000	155010000	RP11-451G4.3'	'RP11-451G4.2';'RP11-451G4.3'	noncoding_lncRNA_intergenic;noncoding_lncRNA_lincRNA	129496	3	155020000	155025000				15000	11	5.04559
129497	3	155025000	155030000	PABPC1P10'	'PABPC1P10'	noncoding_pseudogene	129496	3	155020000	155025000				5000	134	21.2947
129567	3	155375000	155380000	RPL6P7'	'PLCH1';'RPL6P7'	noncoding_pseudogene;protein_coding	129568	3	155380000	155385000		'PLCH1'	protein_coding	5000	54	6.08785
129570	3	155390000	155395000	PLCH1'	'PLCH1'	protein_coding	129568	3	155380000	155385000		'PLCH1'	protein_coding	10000	21	6.92499
129583	3	155455000	155460000	AC104472.1'	'AC104472.1';'PLCH1'	protein_coding	129582	3	155450000	155455000		'PLCH1'	protein_coding	5000	77	10.2781
129583	3	155455000	155460000	AC104472.1'	'AC104472.1';'PLCH1'	protein_coding	129584	3	155460000	155465000	AC104472.1';PLCH1'	'AC104472.1';'PLCH1'	protein_coding	5000	54	5.0879
129587	3	155475000	155480000	RP11-674E16.1'	'C3orf33';'RP11-674E16.1'	noncoding_pseudogene;protein_coding	129591	3	155495000	155500000		'C3orf33'	protein_coding	20000	7	4.77456
1296	1	6475000	6480000	HES2'	'HES2'	protein_coding	1299	1	6490000	6495000	MIR4252'	'ESPN'	protein_coding	15000	18	14.523
129604	3	155560000	155565000	SLC33A1'	'SLC33A1'	protein_coding	129605	3	155565000	155570000		'SLC33A1'	protein_coding	5000	115	21.0935
129632	3	155700000	155705000	SETP14'	'GMPS'	protein_coding	129630	3	155690000	155695000		'GMPS'	protein_coding	10000	38	19.8792
129664	3	155860000	155865000	KCNAB1'	'KCNAB1'	protein_coding	129662	3	155850000	155855000		'KCNAB1'	protein_coding	10000	19	8.35417
129740	3	156240000	156245000	RP11-305K5.1'	'KCNAB1';'RP11-305K5.1';'SSR3'	noncoding_lncRNA_noncoding_antisense;protein_coding	129738	3	156230000	156235000		'KCNAB1';'SSR3'	protein_coding	10000	16	4.61844
129770	3	156390000	156395000	TIPARP';TIPARP-AS1'	'TIPARP';'TIPARP-AS1'	noncoding_lncRNA_divergent;protein_coding	129771	3	156395000	156400000	TIPARP'	'TIPARP'	protein_coding	5000	234	36.7368
129785	3	156465000	156470000	LINC00886'	'CATG00000062386.1';'LINC00886'	noncoding_lncRNA_intergenic;noncoding_lncRNA_noncoding_sense_intronic	129786	3	156470000	156475000	LINC00886'	'CATG00000062386.1';'LINC00886'	noncoding_lncRNA_intergenic;noncoding_lncRNA_noncoding_sense_intronic	5000	57	6.56878
129797	3	156525000	156530000	PA2G4P4'	'CATG00000062386.1';'CATG00000062391.1';'LINC00886';'PA2G4P4'	noncoding_lncRNA_intergenic;noncoding_lncRNA_noncoding_sense_intronic;noncoding_pseudogene	129798	3	156530000	156535000	LINC00886'	'CATG00000062386.1';'CATG00000062392.1';'LINC00886';'PA2G4P4'	noncoding_lncRNA_intergenic;noncoding_lncRNA_noncoding_sense_intronic;noncoding_pseudogene;uncertain_coding	5000	235	36.7368
129800	3	156540000	156545000	LEKR1'	'CATG00000062386.1';'CATG00000066599.1';'LEKR1'	noncoding_lncRNA_divergent;noncoding_lncRNA_noncoding_sense_intronic;protein_coding	129801	3	156545000	156550000	LEKR1'	'CATG00000062386.1';'LEKR1'	noncoding_lncRNA_noncoding_sense_intronic;protein_coding	5000	60	6.66473
129838	3	156730000	156735000	RN7SKP177'	'CATG00000062386.1';'LEKR1'	noncoding_lncRNA_noncoding_sense_intronic;protein_coding	129837	3	156725000	156730000		'CATG00000062386.1';'LEKR1'	noncoding_lncRNA_noncoding_sense_intronic;protein_coding	5000	109	15.3353
129866	3	156870000	156875000	CCNL1';Y_RNA'	'CCNL1';'Y_RNA'	noncoding_misc_RNA;protein_coding	129868	3	156880000	156885000	KRT18P34';RP11-555M1.3'	'KRT18P34';'RP11-550I24.2';'RP11-555M1.3'	noncoding_lncRNA_divergent;noncoding_lncRNA_noncoding_antisense;noncoding_pseudogene	10000	17	7.34597
129868	3	156880000	156885000	KRT18P34';RP11-555M1.3'	'KRT18P34';'RP11-550I24.2';'RP11-555M1.3'	noncoding_lncRNA_divergent;noncoding_lncRNA_noncoding_antisense;noncoding_pseudogene	129870	3	156890000	156895000	RNA5SP146';RP11-550I24.2'	'RNA5SP146';'RP11-550I24.2';'RP11-555M1.3'	noncoding_lncRNA_divergent;noncoding_lncRNA_noncoding_antisense;structural_RNA	10000	16	5.982
129934	3	157210000	157215000	VEPH1'	'VEPH1'	protein_coding	129935	3	157215000	157220000	VEPH1'	'VEPH1'	protein_coding	5000	66	8.54327
130021	3	157645000	157650000	RN7SKP46'	'RN7SKP46'	noncoding_misc_RNA	130019	3	157635000	157640000				10000	48	24.7917
130031	3	157695000	157700000	RP11-290K4.1'	'RP11-290K4.1'	noncoding_lncRNA_lincRNA	130032	3	157700000	157705000				5000	261	36.7368
130056	3	157820000	157825000	RSRC1';SHOX2'	'RSRC1';'SHOX2'	protein_coding	130057	3	157825000	157830000	RSRC1'	'RSRC1';'SHOX2'	protein_coding	5000	97	14.2575
130057	3	157825000	157830000	RSRC1'	'RSRC1';'SHOX2'	protein_coding	130058	3	157830000	157835000		'RSRC1'	protein_coding	5000	56	6.56354
13006	1	65025000	65030000	CACHD1'	'CACHD1'	protein_coding	13008	1	65035000	65040000		'CACHD1'	protein_coding	10000	34	14.4559
13009	1	65040000	65045000	MIR4794'	'CACHD1'	protein_coding	13008	1	65035000	65040000		'CACHD1'	protein_coding	5000	76	12.5014
13010	1	65045000	65050000	MIR4794'	'CACHD1';'MIR4794'	noncoding_miRNA;protein_coding	13008	1	65035000	65040000		'CACHD1'	protein_coding	10000	21	6.65545
130165	3	158365000	158370000	GFM1'	'GFM1';'LXN'	protein_coding	130167	3	158375000	158380000	GFM1'	'GFM1';'LXN';'RP11-379F4.4'	noncoding_lncRNA_divergent;protein_coding	10000	31	13.8215
130171	3	158395000	158400000	GFM1'	'GFM1';'RP11-379F4.4'	noncoding_lncRNA_divergent;protein_coding	130172	3	158400000	158405000	GFM1'	'CATG00000062445.1';'GFM1';'RP11-379F4.4'	noncoding_lncRNA_divergent;noncoding_lncRNA_noncoding_sense_intronic;protein_coding	5000	86	13.8909
130173	3	158405000	158410000	RP11-379F4.7'	'CATG00000062445.1';'GFM1';'RP11-379F4.4'	noncoding_lncRNA_divergent;noncoding_lncRNA_noncoding_sense_intronic;protein_coding	130174	3	158410000	158415000	RP11-379F4.6';RP11-379F4.7'	'GFM1';'RARRES1';'RP11-379F4.4';'RP11-379F4.6';'RP11-379F4.7'	noncoding_lncRNA_divergent;noncoding_lncRNA_lincRNA;protein_coding	5000	73	10.9301
130182	3	158450000	158455000	MFSD1';RARRES1';RP11-379F4.4'	'GFM1';'MFSD1';'RARRES1';'RP11-379F4.4'	noncoding_lncRNA_divergent;protein_coding	130183	3	158455000	158460000	RP11-379F4.4'	'GFM1';'MFSD1';'RP11-379F4.4'	noncoding_lncRNA_divergent;protein_coding	5000	56	6.32132
130191	3	158495000	158500000	RP11-379F4.8'	'CATG00000066638.1';'MFSD1';'RP11-379F4.4'	noncoding_lncRNA_divergent;noncoding_lncRNA_noncoding_antisense;protein_coding	130189	3	158485000	158490000		'MFSD1';'RP11-379F4.4'	noncoding_lncRNA_divergent;protein_coding	10000	21	9.47644
130191	3	158495000	158500000	RP11-379F4.8'	'CATG00000066638.1';'MFSD1';'RP11-379F4.4'	noncoding_lncRNA_divergent;noncoding_lncRNA_noncoding_antisense;protein_coding	130193	3	158505000	158510000		'CATG00000066638.1';'MFSD1';'RP11-379F4.4'	noncoding_lncRNA_divergent;noncoding_lncRNA_noncoding_antisense;protein_coding	10000	20	7.9554
130397	3	159525000	159530000	RNU2-31P'	'CATG00000066646.1';'IQCJ-SCHIP1';'RNU2-31P';'SCHIP1'	noncoding_lncRNA_noncoding_antisense;noncoding_snRNA;protein_coding	130398	3	159530000	159535000		'CATG00000066646.1';'IQCJ-SCHIP1';'SCHIP1'	noncoding_lncRNA_noncoding_antisense;protein_coding	5000	103	15.4259
130400	3	159540000	159545000	AC021654.1'	'AC021654.1';'CATG00000066646.1';'IQCJ-SCHIP1';'SCHIP1'	noncoding_lncRNA_noncoding_antisense;noncoding_miRNA;protein_coding	130398	3	159530000	159535000		'CATG00000066646.1';'IQCJ-SCHIP1';'SCHIP1'	noncoding_lncRNA_noncoding_antisense;protein_coding	10000	16	5.51291
130433	3	159705000	159710000	IL12A'	'IL12A';'IL12A-AS1'	noncoding_lncRNA_intergenic;protein_coding	130434	3	159710000	159715000		'IL12A';'IL12A-AS1'	noncoding_lncRNA_intergenic;protein_coding	5000	68	9.41486
130489	3	159985000	159990000	IFT80'	'IFT80';'RP11-432B6.3'	protein_coding	130488	3	159980000	159985000		'IFT80';'RP11-432B6.3'	protein_coding	5000	68	8.54714
130491	3	159995000	160000000	IFT80'	'IFT80';'RP11-432B6.3'	protein_coding	130498	3	160030000	160035000		'IFT80';'RP11-432B6.3'	protein_coding	35000	5	4.6518
130497	3	160025000	160030000	IFT80'	'IFT80';'RP11-432B6.3'	protein_coding	130498	3	160030000	160035000		'IFT80';'RP11-432B6.3'	protein_coding	5000	150	22.4969
130511	3	160095000	160100000	IFT80'	'IFT80';'RP11-432B6.3'	protein_coding	130512	3	160100000	160105000	IFT80'	'IFT80';'RP11-432B6.3'	protein_coding	5000	225	36.7368
130515	3	160115000	160120000	IFT80';SMC4'	'IFT80';'RP11-432B6.3';'SMC4'	protein_coding	130516	3	160120000	160125000	MIR15B';MIR16-2';SMC4'	'MIR15B';'MIR16-2';'RP11-432B6.3';'SMC4'	noncoding_small_RNA;protein_coding	5000	109	25.5262
130548	3	160280000	160285000	KPNA4';KRT8P12'	'KPNA4';'KRT8P12'	noncoding_pseudogene;protein_coding	130549	3	160285000	160290000	KRT8P12'	'KRT8P12'	noncoding_pseudogene	5000	204	36.7368
130609	3	160585000	160590000	PPM1L'	'CATG00000062544.1';'PPM1L'	noncoding_lncRNA_noncoding_sense_intronic;protein_coding	130611	3	160595000	160600000		'PPM1L'	protein_coding	10000	22	8.22043
130656	3	160820000	160825000	B3GALNT1';NMD3'	'B3GALNT1';'NMD3'	protein_coding	130657	3	160825000	160830000		'NMD3'	protein_coding	5000	99	15.6036
13070	1	65345000	65350000	JAK1'	'JAK1'	protein_coding	13073	1	65360000	65365000		'JAK1'	protein_coding	15000	35	29.2352
13087	1	65430000	65435000	JAK1'	'JAK1';'RP11-182I10.3'	noncoding_lncRNA_intergenic;protein_coding	13086	1	65425000	65430000		'JAK1'	protein_coding	5000	57	7.53104
13091	1	65450000	65455000	SLC2A3P2'	'RP11-182I10.3';'SLC2A3P2'	noncoding_lncRNA_intergenic;noncoding_pseudogene	13093	1	65460000	65465000		'RP11-182I10.3'	noncoding_lncRNA_intergenic	10000	33	13.1104
13094	1	65465000	65470000	RP11-182I10.3';RP4-535B20.4'	'CATG00000003116.1';'RP11-182I10.3';'RP4-535B20.4'	noncoding_lncRNA_intergenic;noncoding_lncRNA_lincRNA;protein_coding	13093	1	65460000	65465000		'RP11-182I10.3'	noncoding_lncRNA_intergenic	5000	111	18.6393
1311	1	6550000	6555000	PLEKHG5'	'CATG00000003734.1';'PLEKHG5'	noncoding_lncRNA_divergent;protein_coding	1316	1	6575000	6580000	PLEKHG5'	'PLEKHG5'	protein_coding	25000	7	7.49974
13127	1	65630000	65635000	AK4'	'AK4'	protein_coding	13128	1	65635000	65640000		'AK4'	protein_coding	5000	105	21.438
13143	1	65710000	65715000	DNAJC6'	'DNAJC6'	protein_coding	13145	1	65720000	65725000	DNAJC6'	'DNAJC6'	protein_coding	10000	45	21.1747
131460	3	164840000	164845000	Y_RNA'	'Y_RNA'	noncoding_misc_RNA	131462	3	164850000	164855000				10000	27	10.203
131545	3	165265000	165270000	RP11-85M11.2'	'RP11-85M11.2'	noncoding_lncRNA_intergenic	131544	3	165260000	165265000		'RP11-85M11.2'	noncoding_lncRNA_intergenic	5000	90	16.5973
13177	1	65880000	65885000	RNU2-15P'	'DNAJC6';'LEPROT';'RNU2-15P'	noncoding_snRNA;protein_coding	13178	1	65885000	65890000	LEPR';LEPROT'	'CATG00000061237.1';'LEPR';'LEPROT'	noncoding_lncRNA_divergent;protein_coding	5000	145	25.078
131979	3	167435000	167440000	PDCD10'	'PDCD10'	protein_coding	131981	3	167445000	167450000	PDCD10'	'PDCD10'	protein_coding	10000	53	26.3965
132013	3	167605000	167610000	MEMO1P3'	'CATG00000066752.1';'MEMO1P3'	noncoding_lncRNA_intergenic;noncoding_pseudogene	132012	3	167600000	167605000		'CATG00000066752.1';'RP11-298O21.2'	noncoding_lncRNA_intergenic;noncoding_lncRNA_noncoding_sense_intronic	5000	79	10.7644
132016	3	167620000	167625000	RP11-298O21.5'	'CATG00000066752.1';'RP11-298O21.5'	noncoding_lncRNA_intergenic	132015	3	167615000	167620000		'CATG00000066752.1';'RP11-298O21.5'	noncoding_lncRNA_intergenic	5000	103	13.9292
132027	3	167675000	167680000	HMGN2P26';RP11-603B13.1'	'HMGN2P26'	noncoding_pseudogene	132030	3	167690000	167695000				15000	18	14.4682
13209	1	66040000	66045000	RP11-430H12.2'	'LEPR';'RP11-430H12.2'	noncoding_pseudogene;protein_coding	13210	1	66045000	66050000		'LEPR'	protein_coding	5000	78	8.60639
132139	3	168235000	168240000	EGFEM1P'	'EGFEM1P'	noncoding_pseudogene	132138	3	168230000	168235000		'EGFEM1P'	noncoding_pseudogene	5000	64	5.81785
132145	3	168265000	168270000	MIR551B'	'EGFEM1P';'MIR551B'	noncoding_miRNA;noncoding_pseudogene	132138	3	168230000	168235000		'EGFEM1P'	noncoding_pseudogene	35000	7	7.11228
132168	3	168380000	168385000	RP11-694D5.1'	'EGFEM1P';'RP11-694D5.1'	noncoding_pseudogene	132169	3	168385000	168390000	RP11-694D5.1'	'EGFEM1P';'RP11-694D5.1'	noncoding_pseudogene	5000	51	5.23356
132388	3	169480000	169485000	TERC'	'ACTRT3';'RP11-816J6.3';'TERC'	noncoding_lncRNA_intergenic;protein_coding	132390	3	169490000	169495000	MYNN';RP11-362K14.5'	'CATG00000066791.1';'MYNN';'RP11-362K14.5'	noncoding_antisense;noncoding_lncRNA_divergent;protein_coding	10000	17	5.64436
132421	3	169645000	169650000	RP11-379K17.2'	'RP11-379K17.4';'SAMD7'	noncoding_lncRNA_divergent;protein_coding	132424	3	169660000	169665000	RP11-379K17.5'	'RP11-379K17.4';'RP11-379K17.5';'SEC62'	noncoding_lncRNA_divergent;noncoding_pseudogene;protein_coding	15000	24	16.5967
132428	3	169680000	169685000	RP11-379K17.4';SEC62'	'RP11-379K17.4';'SEC62'	noncoding_lncRNA_divergent;protein_coding	132429	3	169685000	169690000	SEC62'	'RP11-379K17.4';'SEC62'	noncoding_lncRNA_divergent;protein_coding	5000	62	7.4207
132445	3	169765000	169770000	GPR160'	'GPR160'	protein_coding	132444	3	169760000	169765000		'GPR160'	protein_coding	5000	74	9.94335
132469	3	169885000	169890000	PHC3'	'PHC3'	protein_coding	132468	3	169880000	169885000		'PHC3'	protein_coding	5000	58	5.71051
132470	3	169890000	169895000	PHC3'	'PHC3'	protein_coding	132471	3	169895000	169900000	PHC3'	'PHC3'	protein_coding	5000	57	7.25582
132504	3	170060000	170065000	RP11-543D10.2'	'CATG00000062768.1';'RP11-543D10.2'	noncoding_lncRNA_intergenic;noncoding_lncRNA_lincRNA	132506	3	170070000	170075000	SKIL'	'CATG00000062768.1';'CATG00000066809.1';'RP11-543D10.2';'SKIL'	noncoding_lncRNA_divergent;noncoding_lncRNA_intergenic;noncoding_lncRNA_lincRNA;protein_coding	10000	16	4.95679
132680	3	170940000	170945000	TNIK'	'TNIK'	protein_coding	132681	3	170945000	170950000		'TNIK'	protein_coding	5000	48	5.94462
13276	1	66375000	66380000	PDE4B'	'PDE4B'	protein_coding	13278	1	66385000	66390000		'PDE4B'	protein_coding	10000	21	7.87599
132782	3	171450000	171455000	PLD1'	'PLD1'	protein_coding	132783	3	171455000	171460000	PLD1'	'PLD1'	protein_coding	5000	111	18.2822
132882	3	171950000	171955000	RN7SL141P'	'FNDC3B'	protein_coding	132884	3	171960000	171965000		'CATG00000066860.1';'FNDC3B'	noncoding_lncRNA_divergent;protein_coding	10000	15	5.11759
132897	3	172025000	172030000	FNDC3B'	'FNDC3B'	protein_coding	132898	3	172030000	172035000	AC092964.1'	'AC092964.1';'CATG00000066861.1';'FNDC3B'	noncoding_lncRNA_noncoding_antisense;protein_coding	5000	67	8.47021
132898	3	172030000	172035000	AC092964.1'	'AC092964.1';'CATG00000066861.1';'FNDC3B'	noncoding_lncRNA_noncoding_antisense;protein_coding	132899	3	172035000	172040000	AC092964.1'	'AC092964.1';'CATG00000066861.1';'FNDC3B'	noncoding_lncRNA_noncoding_antisense;protein_coding	5000	285	36.7368
13292	1	66455000	66460000	PDE4B'	'CATG00000003266.1';'PDE4B'	noncoding_lncRNA_noncoding_sense_intronic;protein_coding	13290	1	66445000	66450000		'PDE4B'	protein_coding	10000	27	11.3896
132956	3	172320000	172325000	SLC31A1P1'	'CATG00000062853.1';'SLC31A1P1'	noncoding_lncRNA_intergenic;noncoding_pseudogene	132957	3	172325000	172330000		'CATG00000062853.1'	noncoding_lncRNA_intergenic	5000	186	36.7368
132964	3	172360000	172365000	AC007919.2'	'AC007919.2';'CATG00000062853.1';'NCEH1'	noncoding_lncRNA_intergenic;protein_coding	132963	3	172355000	172360000		'CATG00000062853.1';'NCEH1'	noncoding_lncRNA_intergenic;protein_coding	5000	54	5.3221
132964	3	172360000	172365000	AC007919.2'	'AC007919.2';'CATG00000062853.1';'NCEH1'	noncoding_lncRNA_intergenic;protein_coding	132965	3	172365000	172370000		'NCEH1'	protein_coding	5000	158	32.1621
132969	3	172385000	172390000	AC007919.1'	'AC007919.1';'CATG00000062856.1';'CATG00000066874.1';'NCEH1'	noncoding_lncRNA_noncoding_antisense;noncoding_miRNA;noncoding_sense_overlap_RNA;protein_coding	132968	3	172380000	172385000		'CATG00000062856.1';'NCEH1'	noncoding_lncRNA_noncoding_antisense;protein_coding	5000	65	6.93018
132975	3	172415000	172420000	RNU6-547P'	'NCEH1'	protein_coding	132977	3	172425000	172430000	NCEH1'	'CATG00000062857.1';'NCEH1'	noncoding_short_ncRNA;protein_coding	10000	18	6.69738
132977	3	172425000	172430000	NCEH1'	'CATG00000062857.1';'NCEH1'	noncoding_short_ncRNA;protein_coding	132978	3	172430000	172435000				5000	219	36.7368
132995	3	172515000	172520000	ECT2';RNU4-4P'	'ECT2'	protein_coding	132997	3	172525000	172530000	ECT2'	'ECT2'	protein_coding	10000	60	31.2479
1330	1	6645000	6650000	ZBTB48'	'KLHL21';'ZBTB48'	protein_coding	1332	1	6655000	6660000	KLHL21'	'KLHL21'	protein_coding	10000	17	6.77908
133114	3	173110000	173115000	NLGN1'	'NLGN1'	protein_coding	133115	3	173115000	173120000	NLGN1'	'NLGN1'	protein_coding	5000	85	15.8221
1332	1	6655000	6660000	KLHL21'	'KLHL21'	protein_coding	1337	1	6680000	6685000	THAP3'	'PHF13';'THAP3'	protein_coding	25000	11	12.6797
133262	3	173850000	173855000	NLGN1'	'NLGN1'	protein_coding	133294	3	174010000	174015000		'NLGN1'	protein_coding	160000	5	6.52791
133295	3	174015000	174020000	RP11-393N4.1'			133294	3	174010000	174015000		'NLGN1'	protein_coding	5000	65	10.3385
133323	3	174155000	174160000	NAALADL2'	'NAALADL2'	protein_coding	133322	3	174150000	174155000				5000	166	36.0437
133407	3	174575000	174580000	NAALADL2'	'NAALADL2'	protein_coding	133408	3	174580000	174585000	NAALADL2'	'NAALADL2'	protein_coding	5000	57	5.88763
13345	1	66720000	66725000	PDE4B'	'CATG00000061389.1';'PDE4B'	noncoding_lncRNA_noncoding_antisense;protein_coding	13349	1	66740000	66745000		'CATG00000003328.1';'CATG00000061389.1';'PDE4B'	noncoding_lncRNA_noncoding_antisense;noncoding_lncRNA_noncoding_sense_intronic;protein_coding	20000	11	10.6834
133457	3	174825000	174830000	NAALADL2-AS3'	'NAALADL2';'NAALADL2-AS3'	noncoding_lncRNA_noncoding_antisense;protein_coding	133456	3	174820000	174825000		'NAALADL2';'NAALADL2-AS3'	noncoding_lncRNA_noncoding_antisense;protein_coding	5000	110	16.589
133457	3	174825000	174830000	NAALADL2-AS3'	'NAALADL2';'NAALADL2-AS3'	noncoding_lncRNA_noncoding_antisense;protein_coding	133459	3	174835000	174840000		'NAALADL2'	protein_coding	10000	24	10.2579
133487	3	174975000	174980000	NAALADL2'	'NAALADL2';'NAALADL2-AS2'	noncoding_lncRNA_noncoding_antisense;protein_coding	133489	3	174985000	174990000	NAALADL2-AS2'	'NAALADL2';'NAALADL2-AS2'	noncoding_lncRNA_noncoding_antisense;protein_coding	10000	27	13.7591
133514	3	175110000	175115000	RNU6-1233P'	'NAALADL2'	protein_coding	133513	3	175105000	175110000		'NAALADL2'	protein_coding	5000	79	7.08762
133514	3	175110000	175115000	RNU6-1233P'	'NAALADL2'	protein_coding	133517	3	175125000	175130000		'CATG00000066896.1';'NAALADL2'	noncoding_lncRNA_noncoding_antisense;protein_coding	15000	50	36.7368
133570	3	175390000	175395000	RP11-744O11.2'	'NAALADL2';'RP11-744O11.2'	noncoding_pseudogene;protein_coding	133569	3	175385000	175390000		'NAALADL2'	protein_coding	5000	115	14.4823
133583	3	175455000	175460000	snoU13'	'NAALADL2';'snoU13'	noncoding_snoRNA;protein_coding	133582	3	175450000	175455000		'NAALADL2'	protein_coding	5000	178	29.8161
133589	3	175485000	175490000	RNU6-1317P'	'NAALADL2';'RNU6-1317P'	noncoding_snRNA;protein_coding	133590	3	175490000	175495000	NAALADL2-AS1'	'NAALADL2';'NAALADL2-AS1'	noncoding_antisense;protein_coding	5000	84	13.0784
133623	3	175655000	175660000	RP11-809F4.3'	'RP11-809F4.3'	noncoding_lncRNA_lincRNA	133619	3	175635000	175640000				20000	8	4.95144
133623	3	175655000	175660000	RP11-809F4.3'	'RP11-809F4.3'	noncoding_lncRNA_lincRNA	133624	3	175660000	175665000				5000	100	11.6609
133658	3	175830000	175835000	RP11-78E6.1'	'RP11-78E6.1'	noncoding_pseudogene	133655	3	175815000	175820000				15000	20	13.5402
133788	3	176480000	176485000	RNA5SP147'	'RNA5SP147';'RP11-644C3.1'	noncoding_lncRNA_intergenic;noncoding_rRNA	133787	3	176475000	176480000		'RP11-644C3.1'	noncoding_lncRNA_intergenic	5000	511	36.7368
133841	3	176745000	176750000	TBL1XR1'	'TBL1XR1'	protein_coding	133839	3	176735000	176740000		'TBL1XR1'	protein_coding	10000	34	15.7374
133860	3	176840000	176845000	RNU6-681P'	'RNU6-681P';'TBL1XR1';'Y_RNA'	noncoding_lncRNA_noncoding_sense_intronic;noncoding_snRNA;protein_coding	133857	3	176825000	176830000		'TBL1XR1'	protein_coding	15000	12	7.51815
133905	3	177065000	177070000	RP11-706D8.3'	'LINC00578';'RP11-706D8.3'	noncoding_lncRNA_intergenic;noncoding_lncRNA_lincRNA	133907	3	177075000	177080000		'CATG00000062933.1';'CATG00000066946.1';'CATG00000066950.1';'CATG00000066951.1';'LINC00578'	noncoding_lncRNA_intergenic;noncoding_short_ncRNA	10000	19	8.52822
133924	3	177160000	177165000	LINC00578'	'LINC00578'	noncoding_lncRNA_intergenic	133919	3	177135000	177140000		'LINC00578'	noncoding_lncRNA_intergenic	25000	6	5.441
133924	3	177160000	177165000	LINC00578'	'LINC00578'	noncoding_lncRNA_intergenic	133922	3	177150000	177155000		'LINC00578'	noncoding_lncRNA_intergenic	10000	19	7.62324
133923	3	177155000	177160000	LINC00578'	'LINC00578'	noncoding_lncRNA_intergenic	133924	3	177160000	177165000	LINC00578'	'LINC00578'	noncoding_lncRNA_intergenic	5000	66	8.82138
133924	3	177160000	177165000	LINC00578'	'LINC00578'	noncoding_lncRNA_intergenic	133926	3	177170000	177175000		'LINC00578'	noncoding_lncRNA_intergenic	10000	29	14.0658
133958	3	177330000	177335000	LINC00578'	'LINC00578'	noncoding_lncRNA_intergenic	133957	3	177325000	177330000		'LINC00578'	noncoding_lncRNA_intergenic	5000	98	18.0591
133958	3	177330000	177335000	LINC00578'	'LINC00578'	noncoding_lncRNA_intergenic	133960	3	177340000	177345000	RP11-114M1.2';SNORA18'	'LINC00578';'RP11-114M1.2';'SNORA18'	noncoding_lncRNA_intergenic;noncoding_lncRNA_lincRNA;noncoding_snoRNA	10000	18	6.67785
133960	3	177340000	177345000	RP11-114M1.2';SNORA18'	'LINC00578';'RP11-114M1.2';'SNORA18'	noncoding_lncRNA_intergenic;noncoding_lncRNA_lincRNA;noncoding_snoRNA	134052	3	177800000	177805000		'RP11-91K9.1'	noncoding_lncRNA_intergenic	460000	5	6.41236
13400	1	66995000	67000000	SGIP1'	'CATG00000061441.1';'CATG00000061453.1';'SGIP1'	noncoding_lncRNA_divergent;noncoding_lncRNA_intergenic;protein_coding	13398	1	66985000	66990000		'CATG00000061441.1'	noncoding_lncRNA_intergenic	10000	64	33.3028
133998	3	177530000	177535000	RP11-91K9.1'	'RP11-91K9.1'	noncoding_lncRNA_intergenic	133996	3	177520000	177525000		'CATG00000066957.1'	noncoding_lncRNA_intergenic	10000	17	7.29468
13401	1	67000000	67005000	SGIP1'	'CATG00000061441.1';'SGIP1'	noncoding_lncRNA_intergenic;protein_coding	13402	1	67005000	67010000		'CATG00000061441.1';'SGIP1'	noncoding_lncRNA_intergenic;protein_coding	5000	58	7.49959
134089	3	177985000	177990000	KCNMB2'	'RP11-33A14.1'	noncoding_lncRNA_intergenic	134086	3	177970000	177975000		'RP11-33A14.1'	noncoding_lncRNA_intergenic	15000	9	5.17208
134089	3	177985000	177990000	KCNMB2'	'RP11-33A14.1'	noncoding_lncRNA_intergenic	134090	3	177990000	177995000	KCNMB2'	'RP11-33A14.1'	noncoding_lncRNA_intergenic	5000	80	10.6804
134112	3	178100000	178105000	RP11-33A14.1'	'RP11-33A14.1'	noncoding_lncRNA_intergenic	134111	3	178095000	178100000		'RP11-33A14.1'	noncoding_lncRNA_intergenic	5000	53	5.13691
134112	3	178100000	178105000	RP11-33A14.1'	'RP11-33A14.1'	noncoding_lncRNA_intergenic	134114	3	178110000	178115000				10000	29	13.4178
13417	1	67080000	67085000	SGIP1'	'SGIP1'	protein_coding	13419	1	67090000	67095000	MIR3117';SGIP1'	'MIR3117';'SGIP1'	noncoding_miRNA;protein_coding	10000	18	7.7887
134195	3	178515000	178520000	RP11-385J1.2'	'KCNMB2';'RP11-385J1.2'	noncoding_lncRNA_noncoding_antisense;protein_coding	134196	3	178520000	178525000	KCNMB2';RP11-385J1.2'	'KCNMB2';'RP11-385J1.2'	noncoding_lncRNA_noncoding_antisense;protein_coding	5000	69	7.85056
134197	3	178525000	178530000	KCNMB2'	'KCNMB2';'RP11-385J1.2'	noncoding_lncRNA_noncoding_antisense;protein_coding	134199	3	178535000	178540000		'KCNMB2';'RP11-385J1.2'	noncoding_lncRNA_noncoding_antisense;protein_coding	10000	42	19.8963
134249	3	178785000	178790000	ZMAT3'	'CATG00000062973.1';'ZMAT3'	noncoding_lncRNA_divergent;protein_coding	134250	3	178790000	178795000	ZMAT3'	'CATG00000062973.1';'ZMAT3'	noncoding_lncRNA_divergent;protein_coding	5000	145	28.1899
134282	3	178950000	178955000	RP11-245C23.3'	'KCNMB3';'PIK3CA';'RP11-245C23.3'	noncoding_antisense;protein_coding	134289	3	178985000	178990000	KCNMB3'			35000	7	7.16442
134285	3	178965000	178970000	KCNMB3'	'KCNMB3';'PIK3CA'	protein_coding	134287	3	178975000	178980000	KCNMB3';LRRFIP1P1'	'KCNMB3';'LRRFIP1P1'	noncoding_pseudogene;protein_coding	10000	15	6.71904
13429	1	67140000	67145000	AL139147.1'	'AL139147.1';'SGIP1'	protein_coding	13431	1	67150000	67155000		'SGIP1'	protein_coding	10000	22	9.14011
13429	1	67140000	67145000	AL139147.1'	'AL139147.1';'SGIP1'	protein_coding	13433	1	67160000	67165000	SGIP1'	'SGIP1'	protein_coding	20000	11	8.30106
134305	3	179065000	179070000	MFN1'	'MFN1'	protein_coding	134307	3	179075000	179080000	MFN1'	'MFN1'	protein_coding	10000	14	5.37319
134307	3	179075000	179080000	MFN1'	'MFN1'	protein_coding	134308	3	179080000	179085000	MFN1'	'MFN1'	protein_coding	5000	122	22.727
134319	3	179135000	179140000	GNB4'	'GNB4'	protein_coding	134321	3	179145000	179150000		'GNB4'	protein_coding	10000	30	15.0968
13433	1	67160000	67165000	SGIP1'	'SGIP1'	protein_coding	13434	1	67165000	67170000		'SGIP1'	protein_coding	5000	64	7.62927
134380	3	179440000	179445000	USP13'	'USP13'	protein_coding	134382	3	179450000	179455000		'USP13'	protein_coding	10000	17	6.62823
134442	3	179750000	179755000	PEX5L'	'CATG00000062986.1';'CATG00000062991.1';'PEX5L'	noncoding_lncRNA_divergent;noncoding_lncRNA_noncoding_antisense;protein_coding	134448	3	179780000	179785000		'CATG00000062986.1'	noncoding_lncRNA_noncoding_antisense	30000	6	6.16439
134601	3	180545000	180550000	FLYWCH1P1'	'CCDC39';'FLYWCH1P1'	noncoding_pseudogene;protein_coding	134602	3	180550000	180555000		'CCDC39'	protein_coding	5000	90	13.2157
134613	3	180605000	180610000	RP11-259P15.1'	'FXR1';'RP11-259P15.1'	noncoding_pseudogene;protein_coding	134617	3	180625000	180630000	FXR1'	'FXR1'	protein_coding	20000	10	8.3546
134625	3	180665000	180670000	FXR1'	'CATG00000067029.1';'FXR1'	noncoding_lncRNA_divergent;protein_coding	134631	3	180695000	180700000		'FXR1'	protein_coding	30000	6	5.90038
134628	3	180680000	180685000	FXR1'	'FXR1'	protein_coding	134631	3	180695000	180700000		'FXR1'	protein_coding	15000	23	18.0986
13469	1	67340000	67345000	WDR78'	'WDR78'	protein_coding	13467	1	67330000	67335000		'WDR78'	protein_coding	10000	26	9.78594
13474	1	67365000	67370000	WDR78'	'WDR78'	protein_coding	13479	1	67390000	67395000	MIER1';WDR78'	'MIER1';'WDR78'	protein_coding	25000	22	25.5004
13474	1	67365000	67370000	WDR78'	'WDR78'	protein_coding	13482	1	67405000	67410000		'MIER1'	protein_coding	40000	7	7.41311
13479	1	67390000	67395000	MIER1';WDR78'	'MIER1';'WDR78'	protein_coding	13480	1	67395000	67400000	MIER1'	'MIER1'	protein_coding	5000	56	7.52567
13480	1	67395000	67400000	MIER1'	'MIER1'	protein_coding	13482	1	67405000	67410000		'MIER1'	protein_coding	10000	42	20.3982
134805	3	181565000	181570000	RP11-252O18.2'	'RP11-252O18.2'	noncoding_pseudogene	134803	3	181555000	181560000				10000	20	9.29596
134809	3	181585000	181590000	RP11-252O18.3'			134811	3	181595000	181600000				10000	21	8.74166
13485	1	67420000	67425000	MIER1'	'MIER1'	protein_coding	13483	1	67410000	67415000		'MIER1'	protein_coding	10000	42	16.9613
134859	3	181835000	181840000	RP11-416O18.2'			134862	3	181850000	181855000				15000	11	6.0909
134993	3	182505000	182510000	RP11-225N10.1'	'RP11-225N10.1'	noncoding_lncRNA_divergent	134995	3	182515000	182520000		'ATP11B'	protein_coding	10000	17	6.32922
135003	3	182555000	182560000	ATP11B'	'ATP11B'	protein_coding	135001	3	182545000	182550000		'ATP11B'	protein_coding	10000	42	18.7708
135004	3	182560000	182565000	RP11-225N10.3'	'ATP11B';'RP11-225N10.3'	noncoding_pseudogene;protein_coding	135001	3	182545000	182550000		'ATP11B'	protein_coding	15000	12	4.98345
135008	3	182580000	182585000	ATP11B'	'ATP11B'	protein_coding	135009	3	182585000	182590000		'ATP11B'	protein_coding	5000	99	18.1311
135011	3	182595000	182600000	ATP11B'	'ATP11B'	protein_coding	135009	3	182585000	182590000		'ATP11B'	protein_coding	10000	14	5.10358
135014	3	182610000	182615000	ATP11B'	'ATP11B'	protein_coding	135013	3	182605000	182610000		'ATP11B'	protein_coding	5000	50	5.50367
135026	3	182670000	182675000	RP11-531F16.3'	'DCUN1D1';'RP11-531F16.3'	noncoding_pseudogene;protein_coding	135028	3	182680000	182685000		'DCUN1D1'	protein_coding	10000	16	5.85966
135058	3	182830000	182835000	MCCC1'	'CATG00000063073.1';'MCCC1'	noncoding_lncRNA_divergent;protein_coding	135057	3	182825000	182830000		'CATG00000063073.1';'MCCC1'	noncoding_lncRNA_divergent;protein_coding	5000	47	6.06424
135092	3	183000000	183005000	B3GNT5'	'B3GNT5';'CATG00000067072.1';'MCF2L2'	noncoding_lncRNA_divergent;protein_coding	135093	3	183005000	183010000	B3GNT5'	'B3GNT5';'MCF2L2'	protein_coding	5000	43	5.07599
135097	3	183025000	183030000	MCF2L2'	'B3GNT5';'MCF2L2'	protein_coding	135095	3	183015000	183020000		'B3GNT5';'MCF2L2'	protein_coding	10000	17	6.7443
135162	3	183350000	183355000	KLHL24'	'CATG00000067089.1';'KLHL24'	noncoding_lncRNA_divergent;protein_coding	135163	3	183355000	183360000	KLHL24'	'KLHL24'	protein_coding	5000	55	7.37182
135168	3	183380000	183385000	KLHL24'	'KLHL24'	protein_coding	135173	3	183405000	183410000		'KLHL24'	protein_coding	25000	8	8.30835
135190	3	183490000	183495000	YEATS2'	'YEATS2'	protein_coding	135189	3	183485000	183490000		'YEATS2'	protein_coding	5000	52	4.78316
13519	1	67590000	67595000	C1orf141'	'C1orf141'	protein_coding	13520	1	67595000	67600000	C1orf141'	'C1orf141'	protein_coding	5000	76	8.55987
135190	3	183490000	183495000	YEATS2'	'YEATS2'	protein_coding	135191	3	183495000	183500000		'YEATS2'	protein_coding	5000	66	7.72972
135196	3	183520000	183525000	AC131160.1';YEATS2'	'AC131160.1';'YEATS2';'YEATS2-AS1'	noncoding_antisense;noncoding_miRNA;protein_coding	135198	3	183530000	183535000		'MAP6D1';'YEATS2'	protein_coding	10000	28	15.6093
13520	1	67595000	67600000	C1orf141'	'C1orf141'	protein_coding	13521	1	67600000	67605000	C1orf141'	'C1orf141';'IL23R'	protein_coding	5000	78	9.98113
13521	1	67600000	67605000	C1orf141'	'C1orf141';'IL23R'	protein_coding	13522	1	67605000	67610000		'C1orf141';'IL23R'	protein_coding	5000	66	6.55594
135212	3	183600000	183605000	MIR4448';PARL';RP11-315J22.5'	'MIR4448';'PARL';'RP11-315J22.5'	noncoding_miRNA;noncoding_pseudogene;protein_coding	135214	3	183610000	183615000		'CYP2AB1P'	noncoding_pseudogene	10000	21	8.09345
135216	3	183620000	183625000	CYP2AB1P'	'CYP2AB1P'	noncoding_pseudogene	135214	3	183610000	183615000		'CYP2AB1P'	noncoding_pseudogene	10000	17	6.85405
135272	3	183900000	183905000	ABCF3';AP2M1'	'ABCF3';'AP2M1';'CATG00000067096.1';'EIF2B5'	noncoding_lncRNA_divergent;protein_coding	135214	3	183610000	183615000		'CYP2AB1P'	noncoding_pseudogene	290000	6	8.35616
135232	3	183700000	183705000	ABCC5'	'ABCC5'	protein_coding	135233	3	183705000	183710000		'ABCC5'	protein_coding	5000	44	5.0733
135241	3	183745000	183750000	EEF1A1P8';HTR3D'	'EEF1A1P8';'HTR3D'	noncoding_pseudogene;protein_coding	135245	3	183765000	183770000	HTR3C'			20000	12	10.3457
135258	3	183830000	183835000	HSP90AA5P'	'HSP90AA5P';'RP11-778D9.12'	noncoding_lncRNA_divergent;noncoding_pseudogene	135259	3	183835000	183840000	HSP90AA5P'	'HSP90AA5P';'RP11-778D9.12'	noncoding_lncRNA_divergent;noncoding_pseudogene	5000	125	20.5919
135262	3	183850000	183855000	EIF2B5';RP11-778D9.12';RP11-778D9.13'	'EIF2B5';'RP11-778D9.12';'RP11-778D9.13'	noncoding_lncRNA_divergent;noncoding_lncRNA_lincRNA;protein_coding	135263	3	183855000	183860000	EIF2B5'	'EIF2B5';'RP11-778D9.12'	noncoding_lncRNA_divergent;protein_coding	5000	42	5.67959
135263	3	183855000	183860000	EIF2B5'	'EIF2B5';'RP11-778D9.12'	noncoding_lncRNA_divergent;protein_coding	135266	3	183870000	183875000	DVL3'	'DVL3';'EIF2B5';'RP11-778D9.12'	noncoding_lncRNA_divergent;protein_coding	15000	14	9.70733
135266	3	183870000	183875000	DVL3'	'DVL3';'EIF2B5';'RP11-778D9.12'	noncoding_lncRNA_divergent;protein_coding	135270	3	183890000	183895000	AP2M1'	'AP2M1';'DVL3';'EIF2B5'	protein_coding	20000	11	8.77512
135268	3	183880000	183885000	DVL3'	'DVL3';'EIF2B5'	protein_coding	135270	3	183890000	183895000	AP2M1'	'AP2M1';'DVL3';'EIF2B5'	protein_coding	10000	31	15.4845
135270	3	183890000	183895000	AP2M1'	'AP2M1';'DVL3';'EIF2B5'	protein_coding	135272	3	183900000	183905000	ABCF3';AP2M1'	'ABCF3';'AP2M1';'CATG00000067096.1';'EIF2B5'	noncoding_lncRNA_divergent;protein_coding	10000	29	12.4915
135295	3	184015000	184020000	PSMD2'	'ABCF3';'EIF2B5';'PSMD2'	protein_coding	135298	3	184030000	184035000	EIF4G1'	'ABCF3';'EIF2B5';'EIF4G1'	protein_coding	15000	18	14.3267
135298	3	184030000	184035000	EIF4G1'	'ABCF3';'EIF2B5';'EIF4G1'	protein_coding	135299	3	184035000	184040000	EIF4G1'	'ABCF3';'EIF2B5';'EIF4G1'	protein_coding	5000	52	6.65769
13533	1	67660000	67665000	RNU6-586P'	'IL23R';'RNU6-586P'	noncoding_snRNA;protein_coding	13532	1	67655000	67660000		'IL23R'	protein_coding	5000	51	4.83378
135348	3	184280000	184285000	EPHB3'	'EIF2B5';'EPHB3'	protein_coding	135349	3	184285000	184290000		'EIF2B5';'EPHB3'	protein_coding	5000	71	10.3484
135350	3	184290000	184295000	EPHB3'	'EIF2B5';'EPHB3'	protein_coding	135349	3	184285000	184290000		'EIF2B5';'EPHB3'	protein_coding	5000	65	11.5892
135398	3	184530000	184535000	VPS8'	'VPS8'	protein_coding	135396	3	184520000	184525000				10000	49	23.8976
135401	3	184545000	184550000	VPS8'	'VPS8'	protein_coding	135402	3	184550000	184555000	VPS8'	'VPS8'	protein_coding	5000	53	4.66566
135486	3	184970000	184975000	EHHADH';MIR5588'	'EHHADH';'hsa-mir-5588'	noncoding_small_RNA;protein_coding	135489	3	184985000	184990000		'EHHADH'	protein_coding	15000	21	17.4099
135507	3	185075000	185080000	MAP3K13'	'MAP3K13'	protein_coding	135508	3	185080000	185085000	MAP3K13'	'MAP3K13';'RPL4P4'	noncoding_pseudogene;protein_coding	5000	112	15.0996
135521	3	185145000	185150000	MAP3K13'	'MAP3K13'	protein_coding	135520	3	185140000	185145000		'MAP3K13'	protein_coding	5000	57	6.75177
135523	3	185155000	185160000	MAP3K13';snoU13'	'MAP3K13'	protein_coding	135524	3	185160000	185165000	snoU13'	'MAP3K13';'snoU13'	noncoding_snoRNA;protein_coding	5000	65	6.31506
135545	3	185265000	185270000	LIPH'	'LIPH'	protein_coding	135546	3	185270000	185275000	LIPH'	'LIPH'	protein_coding	5000	47	5.33723
135551	3	185295000	185300000	SENP2'			135552	3	185300000	185305000	SENP2'	'CATG00000067114.1';'SENP2'	noncoding_lncRNA_divergent;protein_coding	5000	84	13.6503
135589	3	185485000	185490000	MIR548AQ'	'IGF2BP2';'MIR548AQ'	noncoding_miRNA;protein_coding	135587	3	185475000	185480000		'CATG00000067119.1';'IGF2BP2'	noncoding_lncRNA_noncoding_sense_intronic;protein_coding	10000	33	18.3498
135619	3	185635000	185640000	TRA2B'	'TRA2B'	protein_coding	135622	3	185650000	185655000	TRA2B'	'TRA2B'	protein_coding	15000	14	9.66967
135620	3	185640000	185645000	TRA2B'	'TRA2B'	protein_coding	135622	3	185650000	185655000	TRA2B'	'TRA2B'	protein_coding	10000	36	18.68
135622	3	185650000	185655000	TRA2B'	'TRA2B'	protein_coding	135623	3	185655000	185660000	TRA2B'	'CATG00000063135.1';'TRA2B'	noncoding_lncRNA_divergent;protein_coding	5000	56	6.27033
135623	3	185655000	185660000	TRA2B'	'CATG00000063135.1';'TRA2B'	noncoding_lncRNA_divergent;protein_coding	135624	3	185660000	185665000				5000	181	36.7368
135746	3	186270000	186275000	TBCCD1'	'TBCCD1'	protein_coding	135748	3	186280000	186285000	DNAJB11';TBCCD1'	'TBCCD1'	protein_coding	10000	67	33.441
13577	1	67880000	67885000	RNU6-387P';SERBP1'	'CATG00000003746.1';'RNU6-387P';'SERBP1'	noncoding_lncRNA_noncoding_antisense;noncoding_snRNA;protein_coding	13579	1	67890000	67895000	SERBP1'	'SERBP1'	protein_coding	10000	17	6.71568
135790	3	186490000	186495000	RNU6-1105P';RP11-573D15.6'	'RNU6-1105P';'RP11-573D15.6';'RP11-573D15.8'	noncoding_lncRNA_divergent;noncoding_pseudogene;noncoding_small_RNA	135791	3	186495000	186500000	EIF4A2';RP11-573D15.9'	'RP11-573D15.6';'RP11-573D15.9'	noncoding_lncRNA_divergent;noncoding_pseudogene	5000	55	5.73706
135791	3	186495000	186500000	EIF4A2';RP11-573D15.9'	'RP11-573D15.6';'RP11-573D15.9'	noncoding_lncRNA_divergent;noncoding_pseudogene	135792	3	186500000	186505000	EIF4A2';RP11-573D15.9';SNORA4';SNORA63';SNORA81';SNORD2'	'CATG00000067144.1';'EIF4A2';'RP11-573D15.9';'SNORA63';'SNORA81';'SNORD2'	noncoding_lncRNA_divergent;noncoding_small_RNA;protein_coding	5000	65	9.53309
135796	3	186520000	186525000	RFC4';RP11-573D15.3'	'RFC4';'RP11-573D15.3'	noncoding_lncRNA_divergent;protein_coding	135797	3	186525000	186530000	RFC4';RP11-573D15.3'	'RP11-573D15.2';'RP11-573D15.3'	noncoding_lncRNA_divergent;noncoding_lncRNA_intergenic	5000	89	15.4203
135821	3	186645000	186650000	AC007690.1';ST6GAL1'	'CATG00000067147.1';'ST6GAL1'	noncoding_lncRNA_divergent;protein_coding	135824	3	186660000	186665000		'ST6GAL1'	protein_coding	15000	15	10.5361
135840	3	186740000	186745000	ST6GAL1'	'ST6GAL1'	protein_coding	135838	3	186730000	186735000		'ST6GAL1'	protein_coding	10000	18	7.01322
135874	3	186910000	186915000	RTP1'	'RP11-208N14.4';'RTP1'	noncoding_antisense;protein_coding	135873	3	186905000	186910000		'RTP1'	protein_coding	5000	58	5.76882
135890	3	186990000	186995000	MASP1'	'MASP1'	protein_coding	135892	3	187000000	187005000	MASP1'	'MASP1'	protein_coding	10000	36	15.7016
135980	3	187440000	187445000	BCL6'	'BCL6';'CATG00000063206.1';'RP11-211G3.3'	protein_coding	135982	3	187450000	187455000	BCL6'	'BCL6';'RP11-211G3.3'	protein_coding	10000	18	6.96109
13599	1	67990000	67995000	RP4-763G1.2'	'CATG00000003777.1'	uncertain_coding	13600	1	67995000	68000000	RP4-763G1.2'	'CATG00000003777.1';'RP4-763G1.2'	noncoding_lncRNA_lincRNA;uncertain_coding	5000	168	27.6685
135994	3	187510000	187515000	RP11-30O15.1'	'CATG00000067177.1';'RP11-30O15.1'	noncoding_lncRNA_intergenic	135996	3	187520000	187525000		'CATG00000067177.1';'RP11-30O15.1'	noncoding_lncRNA_intergenic	10000	16	6.05716
13600	1	67995000	68000000	RP4-763G1.2'	'CATG00000003777.1';'RP4-763G1.2'	noncoding_lncRNA_lincRNA;uncertain_coding	13646	1	68225000	68230000		'CATG00000003873.1';'GNG12'	protein_coding;uncertain_coding	230000	8	11.0515
136065	3	187865000	187870000	LPP-AS2'	'LPP-AS2'	noncoding_lncRNA_divergent	136068	3	187880000	187885000		'LPP'	protein_coding	15000	13	8.1233
136071	3	187895000	187900000	AC022498.1'	'AC022498.1';'LPP'	protein_coding	136073	3	187905000	187910000		'LPP'	protein_coding	10000	21	9.3835
136076	3	187920000	187925000	LPP'	'LPP'	protein_coding	136074	3	187910000	187915000		'LPP'	protein_coding	10000	28	11.9985
136077	3	187925000	187930000	LPP'	'LPP'	protein_coding	136078	3	187930000	187935000	LPP'	'LPP'	protein_coding	5000	58	8.36083
136080	3	187940000	187945000	LPP'	'LPP'	protein_coding	136081	3	187945000	187950000		'LPP'	protein_coding	5000	76	10.02
136129	3	188185000	188190000	LPP'	'LPP'	protein_coding	136126	3	188170000	188175000		'LPP'	protein_coding	15000	10	4.62938
136259	3	188835000	188840000	TPRG1'	'TPRG1'	protein_coding	136260	3	188840000	188845000	TPRG1'	'TPRG1'	protein_coding	5000	165	25.5169
13630	1	68145000	68150000	GADD45A'	'CATG00000061688.1'	noncoding_lncRNA_divergent	13632	1	68155000	68160000		'GADD45A'	protein_coding	10000	61	31.8926
136431	3	189695000	189700000	LEPREL1'	'LEPREL1'	protein_coding	136432	3	189700000	189705000	LEPREL1'	'LEPREL1'	protein_coding	5000	140	24.094
136433	3	189705000	189710000	LEPREL1'	'LEPREL1'	protein_coding	136434	3	189710000	189715000		'LEPREL1'	protein_coding	5000	51	4.73596
136458	3	189830000	189835000	LEPREL1';RN7SL486P'	'LEPREL1';'RN7SL486P'	noncoding_misc_RNA;protein_coding	136444	3	189760000	189765000		'LEPREL1'	protein_coding	70000	5	6.51768
136458	3	189830000	189835000	LEPREL1';RN7SL486P'	'LEPREL1';'RN7SL486P'	noncoding_misc_RNA;protein_coding	136459	3	189835000	189840000	LEPREL1';LEPREL1-AS1'	'LEPREL1';'LEPREL1-AS1'	noncoding_lncRNA_divergent;protein_coding	5000	70	9.21484
136498	3	190030000	190035000	CLDN1'	'CLDN1';'CLDN16'	protein_coding	136496	3	190020000	190025000		'CLDN1';'CLDN16'	protein_coding	10000	44	21.7757
136499	3	190035000	190040000	CLDN1';CLDN16'	'CLDN1';'CLDN16'	protein_coding	136496	3	190020000	190025000		'CLDN1';'CLDN16'	protein_coding	15000	14	7.57037
136500	3	190040000	190045000	CLDN1';CLDN16'	'CLDN1';'CLDN16'	protein_coding	136501	3	190045000	190050000		'CLDN1';'CLDN16'	protein_coding	5000	76	15.5888
136512	3	190100000	190105000	CLDN16'	'CLDN16'	protein_coding	136511	3	190095000	190100000		'CLDN16'	protein_coding	5000	98	15.0441
136608	3	190580000	190585000	GMNC'	'CATG00000063315.1';'GMNC'	noncoding_lncRNA_divergent;protein_coding	136610	3	190590000	190595000		'GMNC'	protein_coding	10000	20	8.99246
13661	1	68300000	68305000	GNG12'	'GNG12-AS1'	noncoding_lncRNA_divergent	13662	1	68305000	68310000		'GNG12-AS1'	noncoding_lncRNA_divergent	5000	115	15.0747
136614	3	190610000	190615000	GMNC'	'GMNC'	protein_coding	136615	3	190615000	190620000				5000	55	5.52488
136698	3	191030000	191035000	UTS2B'	'UTS2B'	protein_coding	136699	3	191035000	191040000		'UTS2B'	protein_coding	5000	74	10.7267
137236	3	193720000	193725000	RP11-699L21.1'	'RP11-407B7.1';'RP11-699L21.1';'RP11-699L21.2'	noncoding_lncRNA_intergenic	137235	3	193715000	193720000		'RP11-407B7.1';'RP11-699L21.1';'RP11-699L21.2'	noncoding_lncRNA_intergenic	5000	48	5.62292
13725	1	68620000	68625000	WLS'	'GNG12-AS1';'WLS'	noncoding_lncRNA_divergent;protein_coding	13727	1	68630000	68635000		'GNG12-AS1';'WLS'	noncoding_lncRNA_divergent;protein_coding	10000	16	4.62472
137253	3	193805000	193810000	RP11-135A1.3'	'CATG00000067309.1';'RP11-135A1.3'	noncoding_lncRNA_intergenic	137250	3	193790000	193795000		'RP11-135A1.3'	noncoding_lncRNA_intergenic	15000	15	11.5273
137253	3	193805000	193810000	RP11-135A1.3'	'CATG00000067309.1';'RP11-135A1.3'	noncoding_lncRNA_intergenic	137256	3	193820000	193825000		'RP11-135A1.3'	noncoding_lncRNA_intergenic	15000	10	5.39322
137262	3	193850000	193855000	HES1'	'CATG00000063410.1';'HES1';'RP11-135A1.2'	noncoding_lncRNA_divergent;noncoding_lncRNA_intergenic;protein_coding	137260	3	193840000	193845000		'RP11-135A1.2';'RP11-135A1.3'	noncoding_lncRNA_divergent;noncoding_lncRNA_intergenic	10000	27	13.8029
13729	1	68640000	68645000	WLS'	'GNG12-AS1';'WLS'	noncoding_lncRNA_divergent;protein_coding	13728	1	68635000	68640000		'GNG12-AS1';'WLS'	noncoding_lncRNA_divergent;protein_coding	5000	215	36.7368
137297	3	194025000	194030000	LINC00887'	'LINC00887'	noncoding_lncRNA_intergenic	137298	3	194030000	194035000	LINC00887'	'LINC00887'	noncoding_lncRNA_intergenic	5000	70	10.1287
137306	3	194070000	194075000	CPN2'	'CPN2'	protein_coding	137302	3	194050000	194055000		'CATG00000063421.1';'CATG00000067320.1'	noncoding_lncRNA_intergenic	20000	8	5.6838
137326	3	194170000	194175000	ATP13A3'	'ATP13A3'	protein_coding	137325	3	194165000	194170000		'ATP13A3'	protein_coding	5000	90	10.1295
137342	3	194250000	194255000	RNU6-1101P'	'RNU6-1101P'	noncoding_snRNA	137343	3	194255000	194260000	RNU6-1101P'			5000	126	27.8474
137352	3	194300000	194305000	TMEM44-AS1'	'CATG00000063434.1';'TMEM44';'TMEM44-AS1'	noncoding_lncRNA_intergenic;protein_coding	137353	3	194305000	194310000	TMEM44';TMEM44-AS1'	'TMEM44';'TMEM44-AS1'	noncoding_lncRNA_intergenic;protein_coding	5000	105	18.8793
137353	3	194305000	194310000	TMEM44';TMEM44-AS1'	'TMEM44';'TMEM44-AS1'	noncoding_lncRNA_intergenic;protein_coding	137354	3	194310000	194315000	TMEM44'	'TMEM44';'TMEM44-AS1'	noncoding_lncRNA_intergenic;protein_coding	5000	251	36.7368
137466	3	194870000	194875000	XXYLT1'	'XXYLT1';'XXYLT1-AS2'	noncoding_lncRNA_noncoding_antisense;protein_coding	137467	3	194875000	194880000	XXYLT1'	'XXYLT1'	protein_coding	5000	49	6.02092
137472	3	194900000	194905000	XXYLT1'	'XXYLT1'	protein_coding	137473	3	194905000	194910000	XXYLT1'	'XXYLT1'	protein_coding	5000	58	8.59006
137477	3	194925000	194930000	XXYLT1'	'XXYLT1'	protein_coding	137478	3	194930000	194935000	RNU6-25P';XXYLT1'	'ACAP2';'XXYLT1'	protein_coding	5000	98	13.5351
137485	3	194965000	194970000	XXYLT1'	'ACAP2';'XXYLT1'	protein_coding	137488	3	194980000	194985000	XXYLT1'	'ACAP2';'XXYLT1'	protein_coding	15000	15	10.9502
137545	3	195265000	195270000	AC091633.3';PPP1R2'	'AC091633.3';'PPP1R2'	noncoding_lncRNA_divergent;protein_coding	137547	3	195275000	195280000		'AC091633.3';'CATG00000067372.1'	noncoding_lncRNA_divergent;noncoding_lncRNA_intergenic	10000	27	11.4114
137549	3	195285000	195290000	AC090018.1'	'AC090018.1';'AC091633.3'	noncoding_lncRNA_divergent;noncoding_pseudogene	137553	3	195305000	195310000	APOD'	'APOD'	protein_coding	20000	7	5.11404
137553	3	195305000	195310000	APOD'	'APOD'	protein_coding	137554	3	195310000	195315000	APOD'	'APOD';'CATG00000063477.1'	noncoding_lncRNA_divergent;protein_coding	5000	85	13.3979
137560	3	195340000	195345000	AC069213.1'	'AC069213.1'	noncoding_pseudogene	137581	3	195445000	195450000	MUC20'	'LINC00969';'MUC20'	noncoding_lncRNA_intergenic;protein_coding	105000	54	36.7368
137560	3	195340000	195345000	AC069213.1'	'AC069213.1'	noncoding_pseudogene	137582	3	195450000	195455000	MUC20'	'LINC00969';'MUC20'	noncoding_lncRNA_intergenic;protein_coding	110000	18	34.945
137565	3	195365000	195370000	RP11-141C7.4'	'CATG00000063480.1';'RP11-141C7.4'	noncoding_lncRNA_lincRNA;uncertain_coding	137967	3	197375000	197380000		'CATG00000063546.1'	protein_coding	2010000	5	14.8316
137568	3	195380000	195385000	AC069513.4';LINC00969';SDHAP2'	'AC069513.4';'CATG00000063480.1';'LINC00969';'SDHAP2'	noncoding_lncRNA_intergenic;noncoding_lncRNA_lincRNA;noncoding_pseudogene;uncertain_coding	137635	3	195715000	195720000	SDHAP1'	'CATG00000063490.1';'SDHAP1'	noncoding_pseudogene;protein_coding	335000	6	15.1496
137568	3	195380000	195385000	AC069513.4';LINC00969';SDHAP2'	'AC069513.4';'CATG00000063480.1';'LINC00969';'SDHAP2'	noncoding_lncRNA_intergenic;noncoding_lncRNA_lincRNA;noncoding_pseudogene;uncertain_coding	137963	3	197355000	197360000	AC024560.3'	'CATG00000063546.1'	protein_coding	1975000	7	13.0522
137569	3	195385000	195390000	AC069513.4';LINC00969';SDHAP2'	'LINC00969';'SDHAP2'	noncoding_lncRNA_intergenic;noncoding_pseudogene	137962	3	197350000	197355000	AC024560.3'	'AC024560.3';'CATG00000063546.1'	noncoding_pseudogene;protein_coding	1965000	5	12.2287
137573	3	195405000	195410000	LINC00969'	'LINC00969';'SDHAP2'	noncoding_lncRNA_intergenic;noncoding_pseudogene	137630	3	195690000	195695000	SDHAP1'	'SDHAP1'	noncoding_pseudogene	285000	7	11.4712
137574	3	195410000	195415000	LINC00969'	'LINC00969';'SDHAP2'	noncoding_lncRNA_intergenic;noncoding_pseudogene	137630	3	195690000	195695000	SDHAP1'	'SDHAP1'	noncoding_pseudogene	280000	61	36.7368
137575	3	195415000	195420000	LINC00969'	'LINC00969';'SDHAP2'	noncoding_lncRNA_intergenic;noncoding_pseudogene	137628	3	195680000	195685000		'RNU2-11P'	noncoding_small_RNA	265000	18	32.2482
137581	3	195445000	195450000	MUC20'	'LINC00969';'MUC20'	noncoding_lncRNA_intergenic;protein_coding	137580	3	195440000	195445000		'LINC00969';'MUC20'	noncoding_lncRNA_intergenic;protein_coding	5000	191	32.4193
137635	3	195715000	195720000	SDHAP1'	'CATG00000063490.1';'SDHAP1'	noncoding_pseudogene;protein_coding	137963	3	197355000	197360000	AC024560.3'	'CATG00000063546.1'	protein_coding	1640000	7	17.2682
137650	3	195790000	195795000	TFRC'	'TFRC'	protein_coding	137651	3	195795000	195800000	RNU7-18P';TFRC'	'RNU7-18P';'TFRC'	noncoding_snRNA;protein_coding	5000	54	5.03717
137665	3	195865000	195870000	LINC00885'	'CATG00000067389.1';'LINC00885';'PCYT1A'	noncoding_lncRNA_intergenic;protein_coding	137666	3	195870000	195875000	LINC00885'	'CATG00000067389.1';'LINC00885';'PCYT1A'	noncoding_lncRNA_intergenic;protein_coding	5000	54	7.32774
137686	3	195970000	195975000	PCYT1A'	'PCYT1A';'RP11-447L10.1'	protein_coding	137688	3	195980000	195985000	PCYT1A'	'PCYT1A';'RP11-447L10.1'	protein_coding	10000	33	17.0979
13769	1	68840000	68845000	TCEB1P18'	'CATG00000061804.1';'TCEB1P18'	noncoding_lncRNA_intergenic;noncoding_pseudogene	13771	1	68850000	68855000		'RP4-694A7.2'	noncoding_lncRNA_intergenic	10000	40	18.2682
137702	3	196050000	196055000	TM4SF19'	'RP11-447L10.1';'TM4SF19';'TM4SF19-AS1'	noncoding_lncRNA_divergent;protein_coding	137706	3	196070000	196075000		'UBXN7'	protein_coding	20000	8	6.20257
137721	3	196145000	196150000	AC083822.2'	'UBXN7'	protein_coding	137722	3	196150000	196155000	AC083822.2'	'AC083822.2';'UBXN7'	noncoding_pseudogene;protein_coding	5000	68	13.256
137778	3	196430000	196435000	RNU6-646P'	'CEP19';'PIGX'	protein_coding	137779	3	196435000	196440000	CEP19';PIGX';RNU6-646P'	'CEP19';'PIGX';'RNU6-646P'	noncoding_snRNA;protein_coding	5000	92	13.9503
137779	3	196435000	196440000	CEP19';PIGX';RNU6-646P'	'CEP19';'PIGX';'RNU6-646P'	noncoding_snRNA;protein_coding	137780	3	196440000	196445000	PIGX'	'PIGX'	protein_coding	5000	76	9.16681
137794	3	196510000	196515000	RNU6-42P'	'PAK2';'RNU6-42P'	noncoding_snRNA;protein_coding	137795	3	196515000	196520000		'PAK2'	protein_coding	5000	47	5.44289
137823	3	196655000	196660000	SENP5'	'NCBP2';'SENP5'	protein_coding	137825	3	196665000	196670000	NCBP2';NCBP2-AS1';NCBP2-AS2'	'CATG00000063526.1';'NCBP2';'NCBP2-AS1';'NCBP2-AS2'	noncoding_lncRNA_divergent;protein_coding	10000	17	5.46031
137830	3	196690000	196695000	PIGZ'	'PIGZ'	protein_coding	137831	3	196695000	196700000	PIGZ'	'CATG00000063529.1';'PIGZ'	protein_coding;uncertain_coding	5000	53	5.24045
137838	3	196730000	196735000	MFI2';MFI2-AS1'	'MFI2';'MFI2-AS1'	noncoding_lncRNA_divergent;protein_coding	137835	3	196715000	196720000		'MFI2';'MFI2-AS1'	noncoding_lncRNA_divergent;protein_coding	15000	10	5.46215
137841	3	196745000	196750000	MFI2'	'MFI2'	protein_coding	137835	3	196715000	196720000		'MFI2';'MFI2-AS1'	noncoding_lncRNA_divergent;protein_coding	30000	6	5.72923
137896	3	197020000	197025000	DLG1';DLG1-AS1';MIR4797'	'DLG1';'DLG1-AS1';'MIR4797'	noncoding_lncRNA_divergent;noncoding_small_RNA;protein_coding	137899	3	197035000	197040000				15000	10	5.79424
137929	3	197185000	197190000	AC128709.2';AC128709.3'	'AC128709.2';'AC128709.3';'BDH1'	noncoding_lncRNA_intergenic;protein_coding	137933	3	197205000	197210000		'AC128709.2';'BDH1'	noncoding_lncRNA_intergenic;protein_coding	20000	10	8.13405
137960	3	197340000	197345000	AC024560.3'	'AC024560.3'	noncoding_pseudogene	137962	3	197350000	197355000	AC024560.3'	'AC024560.3';'CATG00000063546.1'	noncoding_pseudogene;protein_coding	10000	17	6.86031
138011	3	197595000	197600000	LRCH3'	'LRCH3'	protein_coding	138012	3	197600000	197605000	LRCH3'	'LRCH3'	protein_coding	5000	80	14.8067
138024	3	197660000	197665000	IQCG'	'IQCG'	protein_coding	138025	3	197665000	197670000	IQCG'	'IQCG'	protein_coding	5000	112	21.9865
138032	3	197700000	197705000	LMLN'	'LMLN'	protein_coding	138033	3	197705000	197710000	LMLN'	'LMLN'	protein_coding	5000	54	5.7006
138045	3	197765000	197770000	LMLN-AS1'	'ANKRD18DP';'LMLN';'LMLN-AS1'	noncoding_lncRNA_noncoding_antisense;noncoding_pseudogene;protein_coding	138043	3	197755000	197760000		'ANKRD18DP';'LMLN'	noncoding_pseudogene;protein_coding	10000	23	9.42543
138067	3	197875000	197880000	FAM157A'			138066	3	197870000	197875000				5000	37	5.24971
138107	4	50000	55000	Z95704.4';ZNF595'	'Z95704.4';'ZNF595'	noncoding_pseudogene;protein_coding	138105	4	40000	45000		'Z95704.4'	noncoding_pseudogene	10000	115	36.7368
138109	4	60000	65000	Z95704.1'	'CATG00000067453.1';'ZNF595'	noncoding_lncRNA_intergenic;protein_coding	138105	4	40000	45000		'Z95704.4'	noncoding_pseudogene	20000	14	7.04994
138109	4	60000	65000	Z95704.1'	'CATG00000067453.1';'ZNF595'	noncoding_lncRNA_intergenic;protein_coding	138108	4	55000	60000		'CATG00000067453.1';'ZNF595'	noncoding_lncRNA_intergenic;protein_coding	5000	132	15.0642
138109	4	60000	65000	Z95704.1'	'CATG00000067453.1';'ZNF595'	noncoding_lncRNA_intergenic;protein_coding	138110	4	65000	70000	Z95704.1'	'CATG00000067453.1';'Z95704.1';'ZNF595'	noncoding_lncRNA_intergenic;noncoding_miRNA;protein_coding	5000	145	16.4183
138110	4	65000	70000	Z95704.1'	'CATG00000067453.1';'Z95704.1';'ZNF595'	noncoding_lncRNA_intergenic;noncoding_miRNA;protein_coding	147999	4	49510000	49515000	RP11-241F15.3'	'RP11-241F15.3'	noncoding_pseudogene	49445000	6	5.73451
138138	4	205000	210000	ZNF876P'	'AC118278.1';'CATG00000067453.1';'ZNF718';'ZNF876P'	noncoding_lncRNA_intergenic;noncoding_lncRNA_noncoding_sense_intronic;noncoding_pseudogene;noncoding_small_RNA	138163	4	330000	335000	RP11-478C6.1';RP11-478C6.2';ZNF141'	'ABCA11P';'CATG00000067453.1';'RP11-478C6.1';'RP11-478C6.2';'ZNF141'	noncoding_lncRNA_intergenic;noncoding_pseudogene;protein_coding	125000	5	6.89583
138246	4	745000	750000	RP11-440L14.4'	'AC139887.4';'PCGF3';'RP11-440L14.4'	noncoding_lncRNA_noncoding_antisense;noncoding_sense_overlap_RNA;protein_coding	138250	4	765000	770000		'CPLX1';'PCGF3';'RP11-440L14.1'	noncoding_lncRNA_intergenic;protein_coding	20000	6	5.18548
138289	4	960000	965000	DGKQ'	'DGKQ';'TMEM175'	protein_coding	138291	4	970000	975000		'DGKQ';'IDUA';'SLC26A1'	protein_coding	10000	19	8.10642
138319	4	1110000	1115000	SNORA48'	'IDUA';'RP11-20I20.2';'SNORA48';'TMED11P'	noncoding_lncRNA_intergenic;noncoding_pseudogene;noncoding_snoRNA;protein_coding	138321	4	1120000	1125000		'IDUA';'RP11-20I20.2';'TMED11P'	noncoding_lncRNA_intergenic;noncoding_pseudogene;protein_coding	10000	17	5.59574
138329	4	1160000	1165000	RP11-20I20.4';SPON2'	'RP11-20I20.2';'RP11-20I20.4';'SPON2'	noncoding_lncRNA_divergent;noncoding_lncRNA_intergenic;protein_coding	138328	4	1155000	1160000		'RP11-20I20.2';'RP11-20I20.4';'SPON2'	noncoding_lncRNA_divergent;noncoding_lncRNA_intergenic;protein_coding	5000	89	20.869
138361	4	1320000	1325000	MAEA'	'MAEA'	protein_coding	138364	4	1335000	1340000		'CATG00000071579.1';'MAEA';'UVSSA'	protein_coding	15000	11	7.32273
138445	4	1740000	1745000	AC016773.1';TACC3'	'AC016773.1';'CATG00000071589.1';'TACC3'	noncoding_pseudogene;protein_coding;uncertain_coding	138446	4	1745000	1750000	TACC3'	'CATG00000071589.1';'TACC3'	protein_coding;uncertain_coding	5000	57	6.10466
138455	4	1790000	1795000	FGFR3'	'LETM1'	protein_coding	138458	4	1805000	1810000	FGFR3'	'FGFR3';'LETM1'	protein_coding	15000	10	5.8098
138458	4	1805000	1810000	FGFR3'	'FGFR3';'LETM1'	protein_coding	138461	4	1820000	1825000	LETM1'	'LETM1'	protein_coding	15000	23	18.8869
138483	4	1930000	1935000	WHSC1'	'WHSC1'	protein_coding	138485	4	1940000	1945000	WHSC1'	'WHSC1'	protein_coding	10000	17	6.50743
138492	4	1975000	1980000	SCARNA22';WHSC1'	'NELFA';'SCARNA22';'WHSC1'	noncoding_small_RNA;protein_coding	138496	4	1995000	2000000	NELFA'	'NELFA'	protein_coding	20000	10	8.02607
138492	4	1975000	1980000	SCARNA22';WHSC1'	'NELFA';'SCARNA22';'WHSC1'	noncoding_small_RNA;protein_coding	138497	4	2000000	2005000		'NELFA'	protein_coding	25000	6	5.13161
138496	4	1995000	2000000	NELFA'	'NELFA'	protein_coding	138497	4	2000000	2005000		'NELFA'	protein_coding	5000	78	12.9768
138498	4	2005000	2010000	NELFA'	'NELFA'	protein_coding	138499	4	2010000	2015000	NELFA'	'CATG00000067514.1';'NELFA'	noncoding_lncRNA_divergent;protein_coding	5000	59	7.96945
138542	4	2225000	2230000	POLN'	'HAUS3';'POLN'	protein_coding	138544	4	2235000	2240000	COX6B1P5'	'COX6B1P5';'HAUS3';'POLN'	noncoding_pseudogene;protein_coding	10000	58	33.0479
138544	4	2235000	2240000	COX6B1P5'	'COX6B1P5';'HAUS3';'POLN'	noncoding_pseudogene;protein_coding	138545	4	2240000	2245000	HAUS3';POLN'	'HAUS3';'MXD4';'POLN'	protein_coding	5000	242	36.7368
138580	4	2415000	2420000	RP11-503N18.1';ZFYVE28'	'ZFYVE28'	protein_coding	138577	4	2400000	2405000		'ZFYVE28'	protein_coding	15000	13	8.46164
138600	4	2515000	2520000	RNF4'	'RNF4'	protein_coding	138605	4	2540000	2545000		'CATG00000067525.1';'RNF4'	protein_coding;uncertain_coding	25000	9	11.1933
138663	4	2830000	2835000	SH3BP2'	'SH3BP2'	protein_coding	138665	4	2840000	2845000	ADD1'	'CATG00000071631.1';'SH3BP2'	protein_coding	10000	38	19.1905
138668	4	2855000	2860000	ADD1'	'ADD1'	protein_coding	138669	4	2860000	2865000		'ADD1'	protein_coding	5000	159	33.2403
138673	4	2880000	2885000	ADD1'	'ADD1'	protein_coding	138678	4	2905000	2910000	ADD1'	'ADD1'	protein_coding	25000	7	6.28729
138674	4	2885000	2890000	ADD1'	'ADD1'	protein_coding	138678	4	2905000	2910000	ADD1'	'ADD1'	protein_coding	20000	19	17.8377
138721	4	3120000	3125000	HTT'	'HTT'	protein_coding	138719	4	3110000	3115000		'HTT'	protein_coding	10000	27	12.9241
138774	4	3385000	3390000	RGS12'	'RGS12'	protein_coding	138775	4	3390000	3395000		'CATG00000067544.1';'RGS12'	noncoding_lncRNA_noncoding_sense_intronic;protein_coding	5000	54	6.90415
138780	4	3415000	3420000	RGS12'	'RGS12'	protein_coding	138775	4	3390000	3395000		'CATG00000067544.1';'RGS12'	noncoding_lncRNA_noncoding_sense_intronic;protein_coding	25000	7	7.4034
138783	4	3430000	3435000	RGS12'	'CATG00000071640.1';'RGS12'	protein_coding	138789	4	3460000	3465000	DOK7'	'DOK7'	protein_coding	30000	5	5.32754
139927	4	9150000	9155000	FAM86KP'	'CATG00000071765.1';'FAM86KP'	noncoding_lncRNA_divergent;noncoding_pseudogene	138889	4	3960000	3965000		'ALG1L7P'	noncoding_pseudogene	5190000	9	20.4932
138993	4	4480000	4485000	STX18-IT1'	'STX18';'STX18-IT1'	noncoding_lncRNA_noncoding_sense_intronic;protein_coding	138992	4	4475000	4480000		'STX18';'STX18-IT1'	noncoding_lncRNA_noncoding_sense_intronic;protein_coding	5000	119	28.394
139006	4	4545000	4550000	STX18-AS1'	'STX18-AS1'	noncoding_lncRNA_divergent	139007	4	4550000	4555000		'STX18-AS1'	noncoding_lncRNA_divergent	5000	58	5.23759
139027	4	4650000	4655000	STX18-AS1'	'STX18-AS1'	noncoding_lncRNA_divergent	139026	4	4645000	4650000		'STX18-AS1'	noncoding_lncRNA_divergent	5000	132	21.8619
139066	4	4845000	4850000	RP11-326I19.3'	'RP11-326I19.3'	noncoding_lncRNA_intergenic	139069	4	4860000	4865000	MSX1'	'MSX1'	protein_coding	15000	8	5.19184
139354	4	6285000	6290000	WFS1'	'WFS1'	protein_coding	139359	4	6310000	6315000		'CATG00000071708.1';'WFS1'	protein_coding;uncertain_coding	25000	8	6.36593
139421	4	6620000	6625000	MAN2B2'	'MAN2B2'	protein_coding	139423	4	6630000	6635000		'CATG00000071716.1'	uncertain_coding	10000	18	6.80502
13943	1	69710000	69715000	RP11-74K19.1'	'CATG00000004017.1';'RP11-74K19.1'	noncoding_lncRNA_intergenic;noncoding_lncRNA_lincRNA	13946	1	69725000	69730000		'CATG00000004017.1'	noncoding_lncRNA_intergenic	15000	15	9.06119
139431	4	6670000	6675000	AC093323.3';RP11-539L10.3'	'MRFAP1';'RP11-539L10.3'	noncoding_lncRNA_divergent;protein_coding	139435	4	6690000	6695000	AC093323.1';RP11-539L10.2';S100P'	'AC093323.1';'CATG00000067632.1';'MRFAP1';'RP11-539L10.2';'S100P'	noncoding_lncRNA_intergenic;protein_coding	20000	7	4.7655
139436	4	6695000	6700000	S100P'	'AC093323.1';'MRFAP1';'RP11-539L10.2';'S100P'	noncoding_lncRNA_intergenic;protein_coding	139437	4	6700000	6705000		'MRFAP1'	protein_coding	5000	65	10.4845
139479	4	6910000	6915000	TBC1D14'	'CATG00000071726.1';'TBC1D14'	noncoding_lncRNA_divergent;protein_coding	139480	4	6915000	6920000		'TBC1D14'	protein_coding	5000	58	7.78333
139487	4	6950000	6955000	AC092463.1';TBC1D14'	'TBC1D14'	protein_coding	139486	4	6945000	6950000		'TBC1D14'	protein_coding	5000	236	36.7368
139488	4	6955000	6960000	AC092463.1';TBC1D14'	'AC092463.1';'TBC1D14'	noncoding_miRNA;protein_coding	139491	4	6970000	6975000		'TBC1D14'	protein_coding	15000	11	6.97066
139505	4	7040000	7045000	CCDC96';TADA2B'	'CCDC96';'RP11-367J11.2';'TADA2B'	noncoding_antisense;protein_coding	139504	4	7035000	7040000		'RP11-367J11.2'	noncoding_antisense	5000	83	15.5966
139505	4	7040000	7045000	CCDC96';TADA2B'	'CCDC96';'RP11-367J11.2';'TADA2B'	noncoding_antisense;protein_coding	139506	4	7045000	7050000	RP11-367J11.2';TADA2B'	'RP11-367J11.2';'TADA2B'	noncoding_antisense;protein_coding	5000	52	5.96083
139506	4	7045000	7050000	RP11-367J11.2';TADA2B'	'RP11-367J11.2';'TADA2B'	noncoding_antisense;protein_coding	139510	4	7065000	7070000	GRPEL1'	'GRPEL1'	protein_coding	20000	11	8.75634
139647	4	7750000	7755000	AFAP1-AS1'	'AFAP1';'SORCS2'	protein_coding	139648	4	7755000	7760000	AFAP1-AS1'	'AFAP1';'AFAP1-AS1'	noncoding_lncRNA_noncoding_antisense;protein_coding	5000	46	6.05532
139669	4	7860000	7865000	AFAP1'	'AFAP1'	protein_coding	139672	4	7875000	7880000		'AFAP1'	protein_coding	15000	20	11.3005
139732	4	8175000	8180000	GMPSP1'	'GMPSP1'	noncoding_pseudogene	139736	4	8195000	8200000		'SH3TC1'	protein_coding	20000	9	7.87272
139780	4	8415000	8420000	ACOX3'	'ACOX3'	protein_coding	139781	4	8420000	8425000		'ACOX3'	protein_coding	5000	74	10.8675
139782	4	8425000	8430000	ACOX3'	'ACOX3'	protein_coding	139781	4	8420000	8425000		'ACOX3'	protein_coding	5000	62	8.01189
139784	4	8435000	8440000	TRMT44'	'ACOX3';'TRMT44'	protein_coding	139785	4	8440000	8445000	ACOX3';TRMT44'	'ACOX3';'TRMT44'	protein_coding	5000	60	7.55939
139927	4	9150000	9155000	FAM86KP'	'CATG00000071765.1';'FAM86KP'	noncoding_lncRNA_divergent;noncoding_pseudogene	140035	4	9690000	9695000	FAM86MP'	'CATG00000067697.1';'CATG00000071776.1';'FAM86MP'	noncoding_pseudogene;protein_coding;uncertain_coding	540000	6	9.36371
140062	4	9825000	9830000	SLC2A9'	'SLC2A9'	protein_coding	140064	4	9835000	9840000		'SLC2A9'	protein_coding	10000	32	13.9458
140100	4	10015000	10020000	SLC2A9'	'RP11-448G15.1';'SLC2A9'	noncoding_lncRNA_noncoding_antisense;protein_coding	140099	4	10010000	10015000		'RP11-448G15.1';'SLC2A9'	noncoding_lncRNA_noncoding_antisense;protein_coding	5000	53	6.58317
140155	4	10290000	10295000	AC006499.2'	'AC006499.2';'CATG00000067721.1'	noncoding_lncRNA_intergenic;noncoding_pseudogene	140156	4	10295000	10300000	AC006499.1'	'AC006499.1';'CATG00000067721.1'	noncoding_lncRNA_intergenic;noncoding_pseudogene	5000	176	34.945
140234	4	10685000	10690000	CLNK';RP11-61G19.1'	'CLNK';'RP11-61G19.1'	noncoding_lncRNA_divergent;protein_coding	140235	4	10690000	10695000		'CLNK';'RP11-61G19.1'	noncoding_lncRNA_divergent;protein_coding	5000	72	7.73409
140791	4	13470000	13475000	RAB28'	'RAB28'	protein_coding	140793	4	13480000	13485000	RAB28'	'RAB28'	protein_coding	10000	60	28.2337
140794	4	13485000	13490000	RAB28'	'CATG00000067825.1';'RAB28'	noncoding_lncRNA_divergent;protein_coding	140796	4	13495000	13500000				10000	15	5.71552
14100	1	70495000	70500000	RP11-181B18.1'	'LRRC7';'RP11-181B18.1'	noncoding_antisense;protein_coding	14101	1	70500000	70505000		'CATG00000061961.1';'LRRC7'	noncoding_lncRNA_noncoding_antisense;protein_coding	5000	87	9.43252
141074	4	14885000	14890000	LINC00504'	'LINC00504'	noncoding_lncRNA_intergenic	141073	4	14880000	14885000		'LINC00504'	noncoding_lncRNA_intergenic	5000	56	5.69102
141096	4	14995000	15000000	CPEB2-AS1'	'CPEB2-AS1'	noncoding_lncRNA_divergent	141097	4	15000000	15005000	CPEB2';CPEB2-AS1'	'CPEB2';'CPEB2-AS1'	noncoding_lncRNA_divergent;protein_coding	5000	65	10.3288
141226	4	15645000	15650000	FBXL5'	'FBXL5'	protein_coding	141227	4	15650000	15655000		'FBXL5'	protein_coding	5000	161	36.7368
141229	4	15660000	15665000	FBXL5'	'FBXL5'	protein_coding	141230	4	15665000	15670000		'FBXL5'	protein_coding	5000	59	5.13843
141234	4	15685000	15690000	FAM200B'	'BST1';'CD38';'FAM200B';'FBXL5'	protein_coding	141232	4	15675000	15680000		'FBXL5'	protein_coding	10000	18	7.97084
141240	4	15715000	15720000	BST1'	'BST1';'CD38';'FAM200B'	protein_coding	141242	4	15725000	15730000		'BST1';'CD38';'FAM200B'	protein_coding	10000	15	4.87637
141243	4	15730000	15735000	RP11-115L11.1'	'BST1';'CATG00000071902.1';'CD38';'FAM200B';'RP11-115L11.1'	noncoding_lncRNA_intergenic;noncoding_pseudogene;protein_coding	141242	4	15725000	15730000		'BST1';'CD38';'FAM200B'	protein_coding	5000	71	11.4146
141304	4	16035000	16040000	PROM1'	'PROM1'	protein_coding	141305	4	16040000	16045000	PROM1'	'PROM1'	protein_coding	5000	130	22.8742
141314	4	16085000	16090000	PROM1'	'PROM1'	protein_coding	141315	4	16090000	16095000		'PROM1'	protein_coding	5000	127	20.5725
141335	4	16190000	16195000	TAPT1'	'TAPT1'	protein_coding	141336	4	16195000	16200000	TAPT1'	'TAPT1'	protein_coding	5000	223	36.7368
14139	1	70690000	70695000	SRSF11'	'RP4-677H15.4';'SRSF11'	noncoding_lncRNA_divergent;protein_coding	14137	1	70680000	70685000		'RP4-677H15.4';'SRSF11'	noncoding_lncRNA_divergent;protein_coding	10000	44	21.6142
14141	1	70700000	70705000	SRSF11'	'SRSF11'	protein_coding	14143	1	70710000	70715000	SRSF11'	'SRSF11'	protein_coding	10000	61	28.0662
141431	4	16670000	16675000	LDB2'	'LDB2'	protein_coding	141434	4	16685000	16690000		'LDB2'	protein_coding	15000	10	4.82848
141449	4	16760000	16765000	LDB2'	'LDB2'	protein_coding	141450	4	16765000	16770000		'LDB2'	protein_coding	5000	88	14.8095
14156	1	70775000	70780000	ANKRD13C'	'ANKRD13C'	protein_coding	14157	1	70780000	70785000	ANKRD13C'	'ANKRD13C'	protein_coding	5000	185	30.4305
141619	4	17610000	17615000	AC006160.5'	'AC006160.5';'LAP3'	noncoding_lncRNA_divergent;protein_coding	141621	4	17620000	17625000		'FAM184B';'LAP3';'MED28'	protein_coding	10000	32	15.9864
141623	4	17630000	17635000	MED28'	'FAM184B';'LAP3';'MED28'	protein_coding	141621	4	17620000	17625000		'FAM184B';'LAP3';'MED28'	protein_coding	10000	37	15.4277
141988	4	19455000	19460000	RP11-3J1.1';RP11-608O21.1'	'RP11-3J1.1';'RP11-608O21.1'	noncoding_lncRNA_intergenic	141989	4	19460000	19465000		'RP11-608O21.1'	noncoding_lncRNA_intergenic	5000	70	8.19385
142216	4	20595000	20600000	SLIT2'	'SLIT2'	protein_coding	142215	4	20590000	20595000		'SLIT2'	protein_coding	5000	57	5.75638
142236	4	20695000	20700000	PACRGL'	'PACRGL'	protein_coding	142237	4	20700000	20705000	PACRGL'	'CATG00000071961.1';'PACRGL'	noncoding_lncRNA_divergent;protein_coding	5000	103	13.8736
142874	4	23885000	23890000	PPARGC1A'	'PPARGC1A'	protein_coding	142875	4	23890000	23895000	PPARGC1A'	'PPARGC1A'	protein_coding	5000	48	4.85259
142874	4	23885000	23890000	PPARGC1A'	'PPARGC1A'	protein_coding	142881	4	23920000	23925000		'PPARGC1A'	protein_coding	35000	5	4.94568
142876	4	23895000	23900000	PPARGC1A'	'PPARGC1A'	protein_coding	142877	4	23900000	23905000	PPARGC1A'	'PPARGC1A'	protein_coding	5000	90	15.4285
143001	4	24520000	24525000	MIR573'	'DHX15';'MIR573'	noncoding_miRNA;protein_coding	143000	4	24515000	24520000		'DHX15'	protein_coding	5000	105	14.6971
143004	4	24535000	24540000	DHX15'	'DHX15'	protein_coding	143005	4	24540000	24545000	DHX15'	'DHX15'	protein_coding	5000	74	8.44881
143005	4	24540000	24545000	DHX15'	'DHX15'	protein_coding	143008	4	24555000	24560000		'DHX15'	protein_coding	15000	21	15.4051
143013	4	24580000	24585000	DHX15'	'DHX15'	protein_coding	143012	4	24575000	24580000		'DHX15'	protein_coding	5000	110	21.2633
14304	1	71515000	71520000	ZRANB2-AS1'	'ZRANB2-AS1'	noncoding_lncRNA_divergent	14306	1	71525000	71530000	ZRANB2-AS1'	'ZRANB2';'ZRANB2-AS1'	noncoding_lncRNA_divergent;protein_coding	10000	24	8.7189
143050	4	24765000	24770000	AC006390.4'	'AC006390.4';'CATG00000072116.1'	noncoding_lncRNA_intergenic;noncoding_pseudogene	143049	4	24760000	24765000		'CATG00000072116.1'	noncoding_lncRNA_intergenic	5000	250	36.7368
14306	1	71525000	71530000	ZRANB2-AS1'	'ZRANB2';'ZRANB2-AS1'	noncoding_lncRNA_divergent;protein_coding	14307	1	71530000	71535000	MIR186';ZRANB2'	'MIR186';'ZRANB2';'ZRANB2-AS1'	noncoding_lncRNA_divergent;noncoding_small_RNA;protein_coding	5000	134	20.5496
143093	4	24980000	24985000	CCDC149'	'CATG00000068101.1';'CCDC149';'LGI2'	noncoding_lncRNA_divergent;protein_coding	143092	4	24975000	24980000		'CATG00000068101.1';'CCDC149'	noncoding_lncRNA_divergent;protein_coding	5000	150	29.6568
143369	4	26360000	26365000	RBPJ'	'RBPJ'	protein_coding	143371	4	26370000	26375000		'RBPJ'	protein_coding	10000	50	23.5177
143412	4	26575000	26580000	TBC1D19'	'RBPJ';'TBC1D19'	protein_coding	143413	4	26580000	26585000	TBC1D19'	'RBPJ';'TBC1D19'	protein_coding	5000	56	5.12761
143497	4	27000000	27005000	STIM2'	'STIM2'	protein_coding	143499	4	27010000	27015000	STIM2'	'STIM2'	protein_coding	10000	18	6.20325
143498	4	27005000	27010000	STIM2'	'STIM2'	protein_coding	143499	4	27010000	27015000	STIM2'	'STIM2'	protein_coding	5000	232	36.7368
143550	4	27265000	27270000	RP11-415C15.3'	'RP11-415C15.2';'RP11-415C15.3'	noncoding_lncRNA_intergenic;noncoding_lncRNA_lincRNA	143551	4	27270000	27275000		'RP11-415C15.2'	noncoding_lncRNA_intergenic	5000	137	25.8328
14374	1	71865000	71870000	ZRANB2-AS2'	'NEGR1';'ZRANB2-AS2'	noncoding_lncRNA_divergent;protein_coding	14375	1	71870000	71875000	ZRANB2-AS2'	'NEGR1';'ZRANB2-AS2'	noncoding_lncRNA_divergent;protein_coding	5000	87	11.5755
14387	1	71930000	71935000	ZRANB2-AS2'	'NEGR1'	protein_coding	14388	1	71935000	71940000		'NEGR1'	protein_coding	5000	94	10.5499
14390	1	71945000	71950000	ZRANB2-AS2'	'NEGR1'	protein_coding	14388	1	71935000	71940000		'NEGR1'	protein_coding	10000	54	23.4365
14390	1	71945000	71950000	ZRANB2-AS2'	'NEGR1'	protein_coding	14391	1	71950000	71955000	ZRANB2-AS2'	'NEGR1'	protein_coding	5000	70	8.14576
145194	4	35485000	35490000	SEC63P2'	'CATG00000068312.1';'SEC63P2'	noncoding_lncRNA_intergenic;noncoding_pseudogene	145197	4	35500000	35505000		'CATG00000068312.1'	noncoding_lncRNA_intergenic	15000	15	8.00335
145196	4	35495000	35500000	RNU6-573P'	'CATG00000068312.1';'RNU6-573P'	noncoding_lncRNA_intergenic;noncoding_snRNA	145197	4	35500000	35505000		'CATG00000068312.1'	noncoding_lncRNA_intergenic	5000	59	5.75173
145306	4	36045000	36050000	ARAP2'	'ARAP2'	protein_coding	145304	4	36035000	36040000		'ARAP2'	protein_coding	10000	18	7.25979
145414	4	36585000	36590000	RP11-722M1.1'	'RP11-722M1.1'	noncoding_lncRNA_lincRNA	145412	4	36575000	36580000		'RP11-722M1.1'	noncoding_lncRNA_lincRNA	10000	22	7.94236
145497	4	37000000	37005000	RP11-103J17.2'	'RP11-103J17.2'	noncoding_lncRNA_intergenic	145493	4	36980000	36985000				20000	8	5.20479
145497	4	37000000	37005000	RP11-103J17.2'	'RP11-103J17.2'	noncoding_lncRNA_intergenic	145498	4	37005000	37010000		'RP11-103J17.2'	noncoding_lncRNA_intergenic	5000	101	15.6808
145661	4	37820000	37825000	RP11-9D8.1'	'RP11-9D8.1'	noncoding_pseudogene	145660	4	37815000	37820000				5000	73	7.98948
145661	4	37820000	37825000	RP11-9D8.1'	'RP11-9D8.1'	noncoding_pseudogene	145662	4	37825000	37830000	PGM2'	'CATG00000072310.1';'PGM2'	noncoding_lncRNA_divergent;protein_coding	5000	55	6.86497
145670	4	37865000	37870000	RP11-177C12.1'	'PGM2';'RP11-177C12.1'	noncoding_pseudogene;protein_coding	145671	4	37870000	37875000	RP11-177C12.1'	'CATG00000072312.1';'PGM2';'RP11-177C12.1'	noncoding_lncRNA_intergenic;noncoding_pseudogene;protein_coding	5000	86	12.2658
145696	4	37995000	38000000	RP11-177C12.4'	'RP11-177C12.4';'TBC1D1'	noncoding_pseudogene;protein_coding	145697	4	38000000	38005000		'TBC1D1'	protein_coding	5000	58	6.09715
145700	4	38015000	38020000	TBC1D1'	'TBC1D1'	protein_coding	145699	4	38010000	38015000		'TBC1D1'	protein_coding	5000	218	36.7368
145706	4	38045000	38050000	TBC1D1'	'TBC1D1'	protein_coding	145707	4	38050000	38055000	TBC1D1'	'TBC1D1'	protein_coding	5000	67	6.73505
145745	4	38240000	38245000	AC098680.1'	'AC098680.1'	noncoding_miRNA	145741	4	38220000	38225000				20000	9	5.92686
145745	4	38240000	38245000	AC098680.1'	'AC098680.1'	noncoding_miRNA	145743	4	38230000	38235000				10000	24	9.93454
145820	4	38615000	38620000	RP11-617D20.2'	'RP11-617D20.1';'RP11-617D20.2'	noncoding_lncRNA_divergent;noncoding_lncRNA_lincRNA	145819	4	38610000	38615000		'RP11-617D20.1'	noncoding_lncRNA_divergent	5000	52	4.95076
145853	4	38780000	38785000	TLR10'	'TLR1';'TLR10'	protein_coding	145855	4	38790000	38795000		'TLR1';'TLR10'	protein_coding	10000	17	4.67155
145856	4	38795000	38800000	TLR1'	'TLR1';'TLR10'	protein_coding	145855	4	38790000	38795000		'TLR1';'TLR10'	protein_coding	5000	55	5.52736
145857	4	38800000	38805000	TLR1'	'CATG00000068365.1';'TLR1';'TLR10'	noncoding_short_ncRNA;protein_coding	145855	4	38790000	38795000		'TLR1';'TLR10'	protein_coding	10000	22	8.1207
145868	4	38855000	38860000	TLR1';TLR6'	'CATG00000068371.1';'TLR1';'TLR6'	noncoding_lncRNA_divergent;protein_coding	145871	4	38870000	38875000	FAM114A1';MIR574'	'FAM114A1'	protein_coding	15000	15	9.38598
145956	4	39295000	39300000	RFC1';RNU6-32P'	'RFC1';'RNU6-32P'	noncoding_snRNA;protein_coding	145957	4	39300000	39305000	RFC1';RNU6-32P'	'RFC1'	protein_coding	5000	61	6.56201
145957	4	39300000	39305000	RFC1';RNU6-32P'	'RFC1'	protein_coding	145961	4	39320000	39325000	RFC1'	'RFC1'	protein_coding	20000	15	14.2922
145961	4	39320000	39325000	RFC1'	'RFC1'	protein_coding	145962	4	39325000	39330000		'CATG00000068380.1';'RFC1'	noncoding_short_ncRNA;protein_coding	5000	64	7.51626
145970	4	39365000	39370000	RFC1'	'RFC1'	protein_coding	145967	4	39350000	39355000		'RFC1'	protein_coding	15000	13	9.61198
145988	4	39455000	39460000	LIAS';RPL9'	'RPL9'	protein_coding	145987	4	39450000	39455000		'KLB';'RPL9'	protein_coding	5000	125	23.7312
145989	4	39460000	39465000	LIAS';RPL9'	'LIAS';'RPL9'	protein_coding	145991	4	39470000	39475000		'CATG00000072349.1';'LIAS'	noncoding_lncRNA_noncoding_antisense;protein_coding	10000	40	22.6535
146002	4	39525000	39530000	UGDH';UGDH-AS1'	'SMIM14';'UGDH';'UGDH-AS1'	noncoding_lncRNA_divergent;protein_coding	146001	4	39520000	39525000		'UGDH';'UGDH-AS1'	noncoding_lncRNA_divergent;protein_coding	5000	86	13.9282
146003	4	39530000	39535000	UGDH';UGDH-AS1'	'SMIM14';'UGDH-AS1'	noncoding_lncRNA_divergent;protein_coding	146004	4	39535000	39540000		'SMIM14';'UGDH-AS1'	noncoding_lncRNA_divergent;protein_coding	5000	49	4.79748
146024	4	39635000	39640000	RP11-539G18.2';SMIM14'	'RP11-539G18.2';'SMIM14'	noncoding_lncRNA_divergent;protein_coding	146022	4	39625000	39630000		'SMIM14'	protein_coding	10000	23	10.0261
146027	4	39650000	39655000	RP11-539G18.2'	'RP11-539G18.2'	noncoding_lncRNA_divergent	146028	4	39655000	39660000	RP11-539G18.2'	'RP11-539G18.2'	noncoding_lncRNA_divergent	5000	53	6.17221
146039	4	39710000	39715000	RP11-539G18.1';Y_RNA'	'UBE2K';'Y_RNA'	noncoding_misc_RNA;protein_coding	146034	4	39685000	39690000				25000	8	7.24729
146066	4	39845000	39850000	PDS5A'	'PDS5A'	protein_coding	146069	4	39860000	39865000		'PDS5A'	protein_coding	15000	16	9.83708
146084	4	39935000	39940000	RNA5SP159';TCEB1P33'	'PDS5A';'RNA5SP159';'TCEB1P33'	noncoding_pseudogene;noncoding_rRNA;protein_coding	146086	4	39945000	39950000		'PDS5A'	protein_coding	10000	18	7.08036
146084	4	39935000	39940000	RNA5SP159';TCEB1P33'	'PDS5A';'RNA5SP159';'TCEB1P33'	noncoding_pseudogene;noncoding_rRNA;protein_coding	146087	4	39950000	39955000		'PDS5A'	protein_coding	15000	9	4.78437
146108	4	40055000	40060000	N4BP2';RP11-333E13.4'	'CATG00000068404.1';'N4BP2';'RP11-333E13.4'	noncoding_pseudogene;noncoding_short_ncRNA;protein_coding	146109	4	40060000	40065000		'N4BP2'	protein_coding	5000	95	22.1336
146118	4	40105000	40110000	N4BP2'	'N4BP2'	protein_coding	146120	4	40115000	40120000		'N4BP2'	protein_coding	10000	15	6.30288
146167	4	40350000	40355000	CHRNA9'	'CHRNA9'	protein_coding	146169	4	40360000	40365000				10000	34	16.1357
146182	4	40425000	40430000	RP11-588L15.2'	'RBM47';'RP11-588L15.2'	noncoding_lncRNA_noncoding_antisense;protein_coding	146181	4	40420000	40425000		'RBM47'	protein_coding	5000	67	10.1214
146190	4	40465000	40470000	AC098869.1';RBM47'	'AC098869.1';'RBM47'	noncoding_miRNA;protein_coding	146187	4	40450000	40455000		'RBM47'	protein_coding	15000	17	11.4724
146192	4	40475000	40480000	RBM47'	'RBM47'	protein_coding	146195	4	40490000	40495000	RP11-588L15.1'	'RBM47';'RP11-588L15.1'	noncoding_pseudogene;protein_coding	15000	21	16.4953
146198	4	40505000	40510000	MIR4802'	'RBM47'	protein_coding	146196	4	40495000	40500000		'RBM47'	protein_coding	10000	34	17.3831
146256	4	40795000	40800000	NSUN7'	'NSUN7'	protein_coding	146259	4	40810000	40815000	RP11-632F7.3'	'APBB2';'NSUN7';'RP11-632F7.3'	noncoding_lncRNA_noncoding_antisense;protein_coding	15000	11	6.29847
146295	4	40990000	40995000	RNA5SP160'	'APBB2';'RNA5SP160'	noncoding_rRNA;protein_coding	146294	4	40985000	40990000		'APBB2'	protein_coding	5000	173	33.1815
146314	4	41085000	41090000	RNU6-836P'	'APBB2';'RNU6-836P'	noncoding_snRNA;protein_coding	146312	4	41075000	41080000		'APBB2'	protein_coding	10000	21	7.86914
146339	4	41210000	41215000	APBB2'	'APBB2'	protein_coding	146341	4	41220000	41225000		'UCHL1-AS1'	noncoding_lncRNA_divergent	10000	18	7.30753
146348	4	41255000	41260000	UCHL1';UCHL1-AS1'	'UCHL1';'UCHL1-AS1'	noncoding_lncRNA_divergent;protein_coding	146349	4	41260000	41265000	UCHL1'	'UCHL1'	protein_coding	5000	64	5.53235
146357	4	41300000	41305000	Y_RNA'	'CATG00000072397.1'	noncoding_lncRNA_divergent	146353	4	41280000	41285000				20000	18	17.5794
146374	4	41385000	41390000	LIMCH1'	'LIMCH1'	protein_coding	146373	4	41380000	41385000		'LIMCH1'	protein_coding	5000	72	8.79665
146375	4	41390000	41395000	RP11-124A7.1'	'LIMCH1';'RP11-124A7.1'	noncoding_pseudogene;protein_coding	146377	4	41400000	41405000		'LIMCH1'	protein_coding	10000	14	4.65078
146381	4	41420000	41425000	LIMCH1'	'LIMCH1'	protein_coding	146379	4	41410000	41415000		'LIMCH1'	protein_coding	10000	35	20.3142
146405	4	41540000	41545000	LIMCH1'	'LIMCH1'	protein_coding	146407	4	41550000	41555000		'CATG00000072403.1';'LIMCH1'	noncoding_lncRNA_noncoding_antisense;protein_coding	10000	29	13.3155
146419	4	41610000	41615000	LIMCH1'	'LIMCH1'	protein_coding	146418	4	41605000	41610000		'LIMCH1'	protein_coding	5000	51	6.06162
146441	4	41720000	41725000	OR5M14P'	'CATG00000072406.1';'OR5M14P'	noncoding_lncRNA_intergenic;noncoding_pseudogene	146440	4	41715000	41720000		'CATG00000072406.1'	noncoding_lncRNA_intergenic	5000	97	15.0841
146484	4	41935000	41940000	TMEM33'	'CATG00000072411.1';'TMEM33'	noncoding_lncRNA_divergent;protein_coding	146485	4	41940000	41945000	TMEM33'	'TMEM33'	protein_coding	5000	49	5.25772
146494	4	41985000	41990000	RP11-814H16.2'	'CATG00000072413.1';'DCAF4L1';'TMEM33'	noncoding_lncRNA_divergent;protein_coding	146495	4	41990000	41995000	RP11-814H16.2';SLC30A9'	'CATG00000072413.1';'RP11-814H16.2';'SLC30A9'	noncoding_lncRNA_divergent;noncoding_lncRNA_lincRNA;protein_coding	5000	58	5.98697
146495	4	41990000	41995000	RP11-814H16.2';SLC30A9'	'CATG00000072413.1';'RP11-814H16.2';'SLC30A9'	noncoding_lncRNA_divergent;noncoding_lncRNA_lincRNA;protein_coding	146498	4	42005000	42010000		'SLC30A9'	protein_coding	15000	20	12.9105
146509	4	42060000	42065000	SLC30A9'	'SLC30A9'	protein_coding	146510	4	42065000	42070000	SLC30A9'	'SLC30A9'	protein_coding	5000	249	36.7368
146527	4	42150000	42155000	BEND4'	'BEND4';'CATG00000068441.1'	noncoding_lncRNA_divergent;protein_coding	146524	4	42135000	42140000		'BEND4'	protein_coding	15000	12	6.16819
146590	4	42465000	42470000	ATP8A1'	'ATP8A1'	protein_coding	146589	4	42460000	42465000		'ATP8A1'	protein_coding	5000	78	10.0453
146591	4	42470000	42475000	RPS7P7'	'ATP8A1';'RPS7P7'	noncoding_pseudogene;protein_coding	146592	4	42475000	42480000		'ATP8A1'	protein_coding	5000	124	23.2963
146638	4	42705000	42710000	RP11-109E24.1'	'RP11-109E24.1'	noncoding_lncRNA_intergenic	146639	4	42710000	42715000		'RP11-109E24.1'	noncoding_lncRNA_intergenic	5000	55	6.12754
147038	4	44705000	44710000	GNPDA2';RP11-700J17.2'	'GNPDA2';'GUF1';'RP11-700J17.2'	noncoding_antisense;protein_coding	147039	4	44710000	44715000	GNPDA2'	'GNPDA2'	protein_coding	5000	147	22.77
147039	4	44710000	44715000	GNPDA2'	'GNPDA2'	protein_coding	147040	4	44715000	44720000		'GNPDA2'	protein_coding	5000	118	18.1105
147589	4	47460000	47465000	COMMD8'	'COMMD8'	protein_coding	147590	4	47465000	47470000	COMMD8'	'CATG00000068520.1';'COMMD8'	noncoding_lncRNA_divergent;protein_coding	5000	64	6.54913
147665	4	47840000	47845000	CORIN';RP11-121C2.2'	'CATG00000068540.1';'CORIN';'RP11-121C2.2'	noncoding_lncRNA_lincRNA;noncoding_lncRNA_noncoding_antisense;protein_coding	147667	4	47850000	47855000	NFXL1'	'CATG00000068540.1';'NFXL1'	noncoding_lncRNA_noncoding_antisense;protein_coding	10000	62	31.0264
147699	4	48010000	48015000	CNGA1'	'CNGA1';'NIPAL1'	protein_coding	147700	4	48015000	48020000	CNGA1';NIPAL1'	'CATG00000068543.1';'CNGA1';'NIPAL1'	noncoding_lncRNA_divergent;protein_coding	5000	89	16.8253
147742	4	48225000	48230000	TEC'	'TEC'	protein_coding	147745	4	48240000	48245000		'TEC'	protein_coding	15000	12	6.1496
147765	4	48340000	48345000	SLAIN2'	'CATG00000072491.1';'SLAIN2'	noncoding_lncRNA_divergent;protein_coding	147764	4	48335000	48340000		'CATG00000072491.1';'SLAIN2'	noncoding_lncRNA_divergent;protein_coding	5000	77	10.7764
147765	4	48340000	48345000	SLAIN2'	'CATG00000072491.1';'SLAIN2'	noncoding_lncRNA_divergent;protein_coding	147767	4	48350000	48355000		'SLAIN2'	protein_coding	10000	19	6.52879
147771	4	48370000	48375000	SLAIN2'	'SLAIN2'	protein_coding	147772	4	48375000	48380000	SLAIN2'	'SLAIN2'	protein_coding	5000	104	22.5489
147773	4	48380000	48385000	SLAIN2'	'SLAIN2'	protein_coding	147775	4	48390000	48395000		'SLAIN2'	protein_coding	10000	33	17.6877
147827	4	48650000	48655000	FRYL'	'FRYL'	protein_coding	147826	4	48645000	48650000		'FRYL'	protein_coding	5000	120	16.0258
147902	4	49025000	49030000	CWH43'	'CWH43'	protein_coding	147901	4	49020000	49025000		'CWH43'	protein_coding	5000	65	6.72973
147999	4	49510000	49515000	RP11-241F15.3'	'RP11-241F15.3'	noncoding_pseudogene	147960	4	49315000	49320000		'CATG00000072514.1'	noncoding_lncRNA_intergenic	195000	47	36.7368
148639	4	52710000	52715000	DCUN1D4'	'DCUN1D4'	protein_coding	148640	4	52715000	52720000		'CATG00000068577.1';'DCUN1D4'	noncoding_sense_overlap_RNA;protein_coding	5000	75	11.6331
148643	4	52730000	52735000	DUTP7'	'DCUN1D4';'DUTP7'	noncoding_pseudogene;protein_coding	148642	4	52725000	52730000		'DCUN1D4'	protein_coding	5000	52	5.73005
148648	4	52755000	52760000	DCUN1D4'	'DCUN1D4'	protein_coding	148649	4	52760000	52765000	DCUN1D4'	'DCUN1D4'	protein_coding	5000	92	13.0051
148650	4	52765000	52770000	DCUN1D4'	'DCUN1D4'	protein_coding	148651	4	52770000	52775000	DCUN1D4'	'DCUN1D4'	protein_coding	5000	114	18.0157
148679	4	52910000	52915000	RP11-535C7.1'	'RP11-535C7.1'	noncoding_lncRNA_intergenic	148680	4	52915000	52920000	SPATA18'	'CATG00000072525.1';'SPATA18'	noncoding_lncRNA_divergent;protein_coding	5000	45	4.70393
1490	1	7445000	7450000	RP3-453P22.2'	'CAMTA1';'RP3-453P22.2'	noncoding_lncRNA_noncoding_antisense;protein_coding	1488	1	7435000	7440000		'CAMTA1';'RP3-453P22.2'	noncoding_lncRNA_noncoding_antisense;protein_coding	10000	23	9.07262
148801	4	53520000	53525000	USP46';USP46-AS1'	'USP46';'USP46-AS1'	noncoding_lncRNA_divergent;protein_coding	148802	4	53525000	53530000	USP46';USP46-AS1'	'USP46';'USP46-AS1'	noncoding_lncRNA_divergent;protein_coding	5000	50	5.02089
148859	4	53810000	53815000	RP11-752D24.2'	'RP11-752D24.2';'SCFD2'	noncoding_lncRNA_noncoding_antisense;protein_coding	148858	4	53805000	53810000		'SCFD2'	protein_coding	5000	110	15.1898
148958	4	54305000	54310000	FIP1L1'	'FIP1L1'	protein_coding	148959	4	54310000	54315000		'FIP1L1'	protein_coding	5000	64	7.72072
148961	4	54320000	54325000	FIP1L1'	'FIP1L1';'LNX1'	protein_coding	148959	4	54310000	54315000		'FIP1L1'	protein_coding	10000	27	12.2263
148985	4	54440000	54445000	RP11-18M17.1'	'FIP1L1';'LNX1';'RP11-18M17.1'	noncoding_pseudogene;protein_coding	148987	4	54450000	54455000		'FIP1L1';'LNX1'	protein_coding	10000	50	24.9369
148988	4	54455000	54460000	LNX1';LNX1-AS2'	'FIP1L1';'LNX1';'LNX1-AS2'	noncoding_lncRNA_divergent;protein_coding	148987	4	54450000	54455000		'FIP1L1';'LNX1'	protein_coding	5000	57	5.28264
148988	4	54455000	54460000	LNX1';LNX1-AS2'	'FIP1L1';'LNX1';'LNX1-AS2'	noncoding_lncRNA_divergent;protein_coding	148989	4	54460000	54465000	LNX1-AS2'	'FIP1L1';'LNX1';'LNX1-AS2'	noncoding_lncRNA_divergent;protein_coding	5000	140	24.6452
148989	4	54460000	54465000	LNX1-AS2'	'FIP1L1';'LNX1';'LNX1-AS2'	noncoding_lncRNA_divergent;protein_coding	148990	4	54465000	54470000		'FIP1L1';'LNX1';'LNX1-AS2'	noncoding_lncRNA_divergent;protein_coding	5000	124	22.2762
149000	4	54515000	54520000	LNX1'	'FIP1L1';'LNX1'	protein_coding	148999	4	54510000	54515000		'FIP1L1';'LNX1'	protein_coding	5000	91	16.6406
149009	4	54560000	54565000	RP11-317M11.1'	'CATG00000072556.1';'FIP1L1';'RP11-317M11.1'	noncoding_lncRNA_noncoding_antisense;noncoding_lncRNA_noncoding_sense_intronic;protein_coding	149008	4	54555000	54560000		'CATG00000072556.1';'FIP1L1'	noncoding_lncRNA_noncoding_antisense;protein_coding	5000	61	4.96477
149087	4	54950000	54955000	MORF4L2P1'	'CHIC2';'FIP1L1';'MORF4L2P1'	noncoding_pseudogene;protein_coding	149088	4	54955000	54960000		'CHIC2';'FIP1L1'	protein_coding	5000	362	36.7368
149090	4	54965000	54970000	AC110298.1';GSX2'	'AC110298.1';'FIP1L1';'GSX2'	noncoding_miRNA;protein_coding	149088	4	54955000	54960000		'CHIC2';'FIP1L1'	protein_coding	10000	19	6.78529
165454	4	136785000	136790000	LINC00613'	'LINC00613'	noncoding_lncRNA_lincRNA	149152	4	55275000	55280000				81510000	5	5.85152
149191	4	55470000	55475000	AC006552.1'	'AC006552.1'	noncoding_lncRNA_lincRNA	149188	4	55455000	55460000				15000	22	17.0279
149239	4	55710000	55715000	RP11-273B19.1';RP11-273B19.2'	'RP11-273B19.1';'RP11-273B19.2'	noncoding_lncRNA_intergenic;noncoding_lncRNA_lincRNA	149238	4	55705000	55710000		'RP11-273B19.2'	noncoding_lncRNA_lincRNA	5000	43	5.0509
14925	1	74620000	74625000	LRRIQ3'	'LRRIQ3'	protein_coding	14926	1	74625000	74630000		'LRRIQ3'	protein_coding	5000	140	20.8417
149272	4	55875000	55880000	AC111194.1'	'AC111194.1';'CATG00000072584.1'	noncoding_lncRNA_intergenic;noncoding_miRNA	149275	4	55890000	55895000		'CATG00000072584.1'	noncoding_lncRNA_intergenic	15000	13	10.1664
149333	4	56180000	56185000	RP11-148K14.1'	'RP11-148K14.1'	noncoding_pseudogene	149336	4	56195000	56200000				15000	13	6.5785
149346	4	56245000	56250000	SRD5A3-AS1'	'SRD5A3';'SRD5A3-AS1'	noncoding_lncRNA_divergent;protein_coding	149348	4	56255000	56260000	RP11-177J6.1'	'SRD5A3';'SRD5A3-AS1'	noncoding_lncRNA_divergent;protein_coding	10000	13	4.79117
149348	4	56255000	56260000	RP11-177J6.1'	'SRD5A3';'SRD5A3-AS1'	noncoding_lncRNA_divergent;protein_coding	149349	4	56260000	56265000	SRD5A3-AS1';TMEM165'	'SRD5A3';'SRD5A3-AS1';'TMEM165'	noncoding_lncRNA_divergent;protein_coding	5000	44	7.20967
149355	4	56290000	56295000	TMEM165'	'CATG00000072599.1';'CLOCK';'TMEM165'	noncoding_short_ncRNA;protein_coding	149358	4	56305000	56310000	CLOCK'	'CLOCK';'TMEM165'	protein_coding	15000	16	11.2877
149440	4	56715000	56720000	EXOC1'	'EXOC1'	protein_coding	149441	4	56720000	56725000	EXOC1'	'EXOC1'	protein_coding	5000	236	36.7368
149446	4	56745000	56750000	EXOC1'	'EXOC1'	protein_coding	149448	4	56755000	56760000	EXOC1'	'EXOC1'	protein_coding	10000	34	15.1576
149448	4	56755000	56760000	EXOC1'	'EXOC1'	protein_coding	149449	4	56760000	56765000		'EXOC1'	protein_coding	5000	105	12.9401
149450	4	56765000	56770000	EXOC1'	'EXOC1'	protein_coding	149449	4	56760000	56765000		'EXOC1'	protein_coding	5000	82	8.39626
149528	4	57155000	57160000	RNU6-197P'	'KIAA1211'	protein_coding	149529	4	57160000	57165000		'KIAA1211'	protein_coding	5000	79	9.40978
149547	4	57250000	57255000	AASDH';RP11-646I6.5'	'AASDH';'RP11-646I6.5'	noncoding_lncRNA_divergent;protein_coding	149549	4	57260000	57265000	PPAT';RP11-646I6.6'	'PPAT';'RP11-646I6.5';'RP11-646I6.6'	noncoding_lncRNA_divergent;noncoding_lncRNA_lincRNA;protein_coding	10000	20	7.30614
149563	4	57330000	57335000	RP11-393M11.2';SRP72'	'CATG00000072630.1';'RP11-393M11.2';'SRP72'	noncoding_lncRNA_lincRNA;protein_coding;uncertain_coding	149564	4	57335000	57340000	SRP72'	'SRP72'	protein_coding	5000	48	5.88882
14961	1	74800000	74805000	TNNI3K'	'FPGT-TNNI3K';'TNNI3K'	protein_coding	14959	1	74790000	74795000		'FPGT-TNNI3K';'TNNI3K'	protein_coding	10000	25	10.7012
149651	4	57770000	57775000	REST'	'CATG00000072638.1';'REST'	noncoding_lncRNA_divergent;protein_coding	149652	4	57775000	57780000	REST'	'REST'	protein_coding	5000	60	6.7734
149652	4	57775000	57780000	REST'	'REST'	protein_coding	149665	4	57840000	57845000	NOA1';POLR2B'	'NOA1';'POLR2B'	protein_coding	65000	5	6.97709
149668	4	57855000	57860000	snoU13'	'POLR2B'	protein_coding	149670	4	57865000	57870000	RNU6-998P'	'POLR2B';'RNU6-998P'	noncoding_snRNA;protein_coding	10000	14	4.70825
149671	4	57870000	57875000	POLR2B'	'POLR2B'	protein_coding	149675	4	57890000	57895000	POLR2B'	'IGFBP7';'POLR2B'	protein_coding	20000	14	13.6819
149675	4	57890000	57895000	POLR2B'	'IGFBP7';'POLR2B'	protein_coding	149676	4	57895000	57900000		'IGFBP7';'IGFBP7-AS1';'POLR2B'	noncoding_lncRNA_divergent;protein_coding	5000	68	7.17234
149768	4	58355000	58360000	RP11-319E12.2';snoU13'	'RP11-319E12.2';'snoU13'	noncoding_lncRNA_lincRNA;noncoding_snoRNA	149767	4	58350000	58355000				5000	56	5.37399
149891	4	58970000	58975000	SRIP1'			149893	4	58980000	58985000	RP11-25L5.2'	'RP11-25L5.2'	noncoding_pseudogene	10000	17	6.06447
149977	4	59400000	59405000	RP11-577G20.1'	'RP11-577G20.1';'RP11-577G20.2'	noncoding_lncRNA_intergenic;noncoding_lncRNA_lincRNA	149972	4	59375000	59380000				25000	11	8.77812
150	1	745000	750000	RP11-206L10.8'	'LINC00115';'RP11-206L10.10';'RP11-206L10.2';'RP11-206L10.8'	noncoding_lncRNA_intergenic;noncoding_lncRNA_noncoding_sense_intronic;noncoding_pseudogene	44845	1	224220000	224225000	RP11-504P24.5'	'CATG00000095946.1';'RP11-504P24.5';'RP11-504P24.6'	noncoding_lncRNA_intergenic;noncoding_pseudogene;protein_coding	223475000	19	36.7368
150072	4	59875000	59880000	RP11-340A13.2'	'RP11-340A13.2'	noncoding_lncRNA_lincRNA	150071	4	59870000	59875000		'RP11-340A13.2'	noncoding_lncRNA_lincRNA	5000	57	5.50023
1501	1	7500000	7505000	RP4-549F15.1'	'CAMTA1';'RP4-549F15.1'	noncoding_lncRNA_noncoding_antisense;protein_coding	1504	1	7515000	7520000		'CAMTA1'	protein_coding	15000	10	6.00406
150236	4	60695000	60700000	RNU6-1325P';Y_RNA'	'RNU6-1325P';'Y_RNA'	noncoding_misc_RNA;noncoding_snRNA	150234	4	60685000	60690000				10000	19	7.84229
150237	4	60700000	60705000	RNU6-1325P'			150234	4	60685000	60690000				15000	11	6.70276
150454	4	61785000	61790000	MIR548AG1'	'MIR548AG1'	noncoding_miRNA	150452	4	61775000	61780000				10000	40	18.6737
151	1	750000	755000	FAM87B';RP11-206L10.10'	'FAM87B';'LINC00115';'RP11-206L10.10';'RP11-206L10.2'	noncoding_lncRNA_intergenic;noncoding_lncRNA_noncoding_sense_intronic	152	1	755000	760000		'FAM87B';'LINC00115';'RP11-206L10.10';'RP11-206L10.2'	noncoding_lncRNA_intergenic;noncoding_lncRNA_noncoding_sense_intronic	5000	67	11.1596
151403	4	66530000	66535000	EPHA5';RP11-807H7.1'	'EPHA5'	protein_coding	151402	4	66525000	66530000		'EPHA5'	protein_coding	5000	91	12.9708
151763	4	68330000	68335000	RP11-584P21.2'	'CENPC'	protein_coding	151766	4	68345000	68350000		'CENPC'	protein_coding	15000	24	18.5821
151768	4	68355000	68360000	CENPC'	'CENPC'	protein_coding	151766	4	68345000	68350000		'CENPC'	protein_coding	10000	22	8.38725
151773	4	68380000	68385000	CENPC'	'CENPC'	protein_coding	151774	4	68385000	68390000		'CENPC'	protein_coding	5000	166	28.0351
151776	4	68395000	68400000	CENPC'	'CENPC'	protein_coding	151774	4	68385000	68390000		'CENPC'	protein_coding	10000	37	16.9017
151798	4	68505000	68510000	UBA6'	'UBA6'	protein_coding	151793	4	68480000	68485000		'UBA6'	protein_coding	25000	31	36.7368
151813	4	68580000	68585000	ST3GAL1P1'	'RP11-453E17.3';'ST3GAL1P1';'UBA6-AS1'	noncoding_lncRNA_divergent;noncoding_pseudogene	151812	4	68575000	68580000		'UBA6-AS1'	noncoding_lncRNA_divergent	5000	67	8.95401
151931	4	69170000	69175000	APOOP4'	'APOOP4';'RP11-642E20.3';'YTHDC1'	noncoding_pseudogene;protein_coding	151933	4	69180000	69185000	YTHDC1'	'YTHDC1'	protein_coding	10000	50	23.9607
151934	4	69185000	69190000	YTHDC1'	'YTHDC1'	protein_coding	151935	4	69190000	69195000	YTHDC1'	'YTHDC1'	protein_coding	5000	191	36.7368
151936	4	69195000	69200000	YTHDC1'	'YTHDC1'	protein_coding	151937	4	69200000	69205000	YTHDC1'	'YTHDC1'	protein_coding	5000	246	36.7368
151937	4	69200000	69205000	YTHDC1'	'YTHDC1'	protein_coding	151938	4	69205000	69210000	YTHDC1'	'YTHDC1'	protein_coding	5000	77	8.50591
151938	4	69205000	69210000	YTHDC1'	'YTHDC1'	protein_coding	151939	4	69210000	69215000	YTHDC1'	'YTHDC1'	protein_coding	5000	110	14.3841
151939	4	69210000	69215000	YTHDC1'	'YTHDC1'	protein_coding	151942	4	69225000	69230000				15000	20	12.7314
151959	4	69310000	69315000	TMPRSS11E'	'TMPRSS11E'	protein_coding	151961	4	69320000	69325000		'TMPRSS11E'	protein_coding	10000	15	5.72522
151995	4	69490000	69495000	RP11-1267H10.3'	'RP11-1267H10.3';'UGT2B15'	noncoding_pseudogene;protein_coding	151971	4	69370000	69375000				120000	123	36.7368
152003	4	69530000	69535000	UGT2B15'	'UGT2B15'	protein_coding	151982	4	69425000	69430000		'UGT2B15';'UGT2B17'	protein_coding	105000	7	11.7577
151983	4	69430000	69435000	UGT2B17'	'UGT2B15';'UGT2B17'	protein_coding	152003	4	69530000	69535000	UGT2B15'	'UGT2B15'	protein_coding	100000	48	36.7368
151983	4	69430000	69435000	UGT2B17'	'UGT2B15';'UGT2B17'	protein_coding	152004	4	69535000	69540000	UGT2B15'	'UGT2B15'	protein_coding	105000	12	25.2902
153	1	760000	765000	LINC00115';LINC01128'	'LINC00115';'RP11-206L10.10';'RP11-206L10.11';'RP11-206L10.2'	noncoding_lncRNA_intergenic;noncoding_lncRNA_noncoding_sense_intronic	152	1	755000	760000		'FAM87B';'LINC00115';'RP11-206L10.10';'RP11-206L10.2'	noncoding_lncRNA_intergenic;noncoding_lncRNA_noncoding_sense_intronic	5000	60	8.06418
152033	4	69680000	69685000	RP11-468N14.1';UGT2B10'	'RP11-468N14.1';'UGT2B10'	noncoding_pseudogene;protein_coding	152073	4	69880000	69885000	RP11-813N20.1'	'RP11-813N20.1'	noncoding_pseudogene	200000	7	11.3681
152033	4	69680000	69685000	RP11-468N14.1';UGT2B10'	'RP11-468N14.1';'UGT2B10'	noncoding_pseudogene;protein_coding	152074	4	69885000	69890000	RP11-813N20.1';RP11-813N20.2'	'RP11-813N20.1';'RP11-813N20.2'	noncoding_pseudogene	205000	13	23.1669
152033	4	69680000	69685000	RP11-468N14.1';UGT2B10'	'RP11-468N14.1';'UGT2B10'	noncoding_pseudogene;protein_coding	152148	4	70255000	70260000	RP11-790I12.1'	'RP11-790I12.1';'SULT1B1'	noncoding_pseudogene;protein_coding	575000	5	6.49162
152037	4	69700000	69705000	RP11-468N14.3'	'RP11-468N14.3'	noncoding_pseudogene	152041	4	69720000	69725000				20000	7	5.35277
152042	4	69725000	69730000	RP11-468N14.4'	'RP11-468N14.4'	noncoding_pseudogene	152041	4	69720000	69725000				5000	58	6.26681
152045	4	69740000	69745000	RP11-468N14.5'	'RP11-468N14.5'	noncoding_pseudogene	152043	4	69730000	69735000				10000	44	23.3877
152052	4	69775000	69780000	RP11-468N14.09'	'CATG00000068838.1'	noncoding_lncRNA_intergenic	152055	4	69790000	69795000	RP11-468N14.09'	'RP11-468N14.09';'UGT2A3'	noncoding_pseudogene;protein_coding	15000	31	27.1394
152055	4	69790000	69795000	RP11-468N14.09'	'RP11-468N14.09';'UGT2A3'	noncoding_pseudogene;protein_coding	152056	4	69795000	69800000		'UGT2A3'	protein_coding	5000	102	14.2184
152067	4	69850000	69855000	RP11-468N14.12'	'RP11-468N14.12'	noncoding_pseudogene	152069	4	69860000	69865000	RP11-468N14.11'	'RP11-468N14.11'	noncoding_pseudogene	10000	31	13.3966
152071	4	69870000	69875000	RP11-813N20.1'	'RP11-813N20.1'	noncoding_pseudogene	152073	4	69880000	69885000	RP11-813N20.1'	'RP11-813N20.1'	noncoding_pseudogene	10000	17	7.78266
152089	4	69960000	69965000	UGT2B7'	'SULT1B1';'UGT2B7'	protein_coding	152086	4	69945000	69950000		'SULT1B1';'UGT2B7'	protein_coding	15000	15	7.93488
152089	4	69960000	69965000	UGT2B7'	'SULT1B1';'UGT2B7'	protein_coding	152090	4	69965000	69970000		'SULT1B1';'UGT2B7'	protein_coding	5000	62	6.76896
152089	4	69960000	69965000	UGT2B7'	'SULT1B1';'UGT2B7'	protein_coding	152093	4	69980000	69985000		'SULT1B1';'UGT2B7'	protein_coding	20000	9	5.73536
152096	4	69995000	70000000	RP13-644M16.3'	'RP13-644M16.3';'SULT1B1';'UGT2B7'	noncoding_pseudogene;protein_coding	152093	4	69980000	69985000		'SULT1B1';'UGT2B7'	protein_coding	15000	22	15.6535
15210	1	76045000	76050000	RP4-595K12.1'	'CATG00000063171.1';'RP4-595K12.1';'SLC44A5'	noncoding_lncRNA_noncoding_sense_intronic;noncoding_pseudogene;protein_coding	15211	1	76050000	76055000		'CATG00000063171.1';'SLC44A5'	noncoding_lncRNA_noncoding_sense_intronic;protein_coding	5000	71	6.8983
152106	4	70045000	70050000	RP11-704M14.1';RP13-644M16.4'	'RP11-704M14.1';'RP13-644M16.4';'SULT1B1'	noncoding_lncRNA_intergenic;noncoding_pseudogene;protein_coding	152118	4	70105000	70110000	RP11-618I10.1'	'RP11-618I10.1';'SULT1B1'	noncoding_pseudogene;protein_coding	60000	5	14.5818
152110	4	70065000	70070000	RP11-704M14.1'	'RP11-704M14.1';'SULT1B1';'UGT2B11'	noncoding_lncRNA_intergenic;protein_coding	152109	4	70060000	70065000		'RP11-704M14.1';'SULT1B1';'UGT2B11'	noncoding_lncRNA_intergenic;protein_coding	5000	48	5.44909
152110	4	70065000	70070000	RP11-704M14.1'	'RP11-704M14.1';'SULT1B1';'UGT2B11'	noncoding_lncRNA_intergenic;protein_coding	152112	4	70075000	70080000	UGT2B11'	'RP11-704M14.1';'SULT1B1';'UGT2B11'	noncoding_lncRNA_intergenic;protein_coding	10000	19	6.79788
152112	4	70075000	70080000	UGT2B11'	'RP11-704M14.1';'SULT1B1';'UGT2B11'	noncoding_lncRNA_intergenic;protein_coding	152126	4	70145000	70150000	UGT2B28'	'SULT1B1';'UGT2B28'	protein_coding	70000	7	9.41107
152112	4	70075000	70080000	UGT2B11'	'RP11-704M14.1';'SULT1B1';'UGT2B11'	noncoding_lncRNA_intergenic;protein_coding	152152	4	70275000	70280000	RP11-790I12.2'	'RP11-790I12.2';'SULT1B1'	noncoding_pseudogene;protein_coding	200000	7	9.48136
152113	4	70080000	70085000	RP11-704M14.2';UGT2B11'	'RP11-704M14.1';'RP11-704M14.2';'SULT1B1';'UGT2B11'	noncoding_lncRNA_intergenic;noncoding_pseudogene;protein_coding	152147	4	70250000	70255000	RP11-618I10.3';RP11-790I12.1'	'RP11-618I10.3';'SULT1B1'	noncoding_pseudogene;protein_coding	170000	22	36.7368
152113	4	70080000	70085000	RP11-704M14.2';UGT2B11'	'RP11-704M14.1';'RP11-704M14.2';'SULT1B1';'UGT2B11'	noncoding_lncRNA_intergenic;noncoding_pseudogene;protein_coding	152151	4	70270000	70275000	RP11-790I12.2';RP11-790I12.6'	'RP11-790I12.2';'RP11-790I12.6';'SULT1B1'	noncoding_pseudogene;protein_coding	190000	6	10.0784
152126	4	70145000	70150000	UGT2B28'	'SULT1B1';'UGT2B28'	protein_coding	152148	4	70255000	70260000	RP11-790I12.1'	'RP11-790I12.1';'SULT1B1'	noncoding_pseudogene;protein_coding	110000	20	34.0288
152126	4	70145000	70150000	UGT2B28'	'SULT1B1';'UGT2B28'	protein_coding	152152	4	70275000	70280000	RP11-790I12.2'	'RP11-790I12.2';'SULT1B1'	noncoding_pseudogene;protein_coding	130000	13	21.0635
152131	4	70170000	70175000	RP11-618I10.4'	'RP11-618I10.4';'SULT1B1'	noncoding_pseudogene;protein_coding	152139	4	70210000	70215000	RP11-618I10.2'	'RP11-618I10.2';'SULT1B1'	noncoding_pseudogene;protein_coding	40000	7	19.4677
152147	4	70250000	70255000	RP11-618I10.3';RP11-790I12.1'	'RP11-618I10.3';'SULT1B1'	noncoding_pseudogene;protein_coding	152151	4	70270000	70275000	RP11-790I12.2';RP11-790I12.6'	'RP11-790I12.2';'RP11-790I12.6';'SULT1B1'	noncoding_pseudogene;protein_coding	20000	16	17.0126
152148	4	70255000	70260000	RP11-790I12.1'	'RP11-790I12.1';'SULT1B1'	noncoding_pseudogene;protein_coding	152151	4	70270000	70275000	RP11-790I12.2';RP11-790I12.6'	'RP11-790I12.2';'RP11-790I12.6';'SULT1B1'	noncoding_pseudogene;protein_coding	15000	9	5.19171
152148	4	70255000	70260000	RP11-790I12.1'	'RP11-790I12.1';'SULT1B1'	noncoding_pseudogene;protein_coding	152152	4	70275000	70280000	RP11-790I12.2'	'RP11-790I12.2';'SULT1B1'	noncoding_pseudogene;protein_coding	20000	25	26.0803
152151	4	70270000	70275000	RP11-790I12.2';RP11-790I12.6'	'RP11-790I12.2';'RP11-790I12.6';'SULT1B1'	noncoding_pseudogene;protein_coding	152152	4	70275000	70280000	RP11-790I12.2'	'RP11-790I12.2';'SULT1B1'	noncoding_pseudogene;protein_coding	5000	104	21.8327
152152	4	70275000	70280000	RP11-790I12.2'	'RP11-790I12.2';'SULT1B1'	noncoding_pseudogene;protein_coding	152156	4	70295000	70300000		'CATG00000072727.1';'SULT1B1'	noncoding_short_ncRNA;protein_coding	20000	7	5.74138
152165	4	70340000	70345000	AC108078.1'	'SULT1B1'	protein_coding	152169	4	70360000	70365000	UGT2B4'	'SULT1B1';'UGT2B4'	protein_coding	20000	11	10.7053
152247	4	70750000	70755000	RP11-736K12.1'	'CSN1S1';'RP11-736K12.1'	noncoding_pseudogene;protein_coding	152243	4	70730000	70735000		'CSN1S1'	protein_coding	20000	8	4.7555
152346	4	71245000	71250000	SMR3B'	'SMR3B'	protein_coding	152347	4	71250000	71255000		'SMR3B'	protein_coding	5000	59	7.68277
152349	4	71260000	71265000	PROL1'	'PROL1'	protein_coding	152347	4	71250000	71255000		'SMR3B'	protein_coding	10000	32	14.3492
152349	4	71260000	71265000	PROL1'	'PROL1'	protein_coding	152351	4	71270000	71275000		'PROL1'	protein_coding	10000	57	32.0734
152388	4	71455000	71460000	AMBN'	'AMBN'	protein_coding	152387	4	71450000	71455000				5000	73	7.90906
152388	4	71455000	71460000	AMBN'	'AMBN'	protein_coding	152389	4	71460000	71465000		'AMBN'	protein_coding	5000	189	36.7368
152414	4	71585000	71590000	RUFY3'	'RUFY3'	protein_coding	152416	4	71595000	71600000	RUFY3'	'RUFY3'	protein_coding	10000	40	21.3111
152414	4	71585000	71590000	RUFY3'	'RUFY3'	protein_coding	152417	4	71600000	71605000	RUFY3'	'RUFY3'	protein_coding	15000	23	16.3881
152416	4	71595000	71600000	RUFY3'	'RUFY3'	protein_coding	152417	4	71600000	71605000	RUFY3'	'RUFY3'	protein_coding	5000	51	5.50044
152428	4	71655000	71660000	RUFY3'	'RUFY3'	protein_coding	152430	4	71665000	71670000	RUFY3'	'RUFY3'	protein_coding	10000	32	16.5968
152475	4	71890000	71895000	DCK'	'DCK'	protein_coding	152474	4	71885000	71890000		'DCK';'MOB1B'	protein_coding	5000	218	36.7368
15253	1	76260000	76265000	MSH4';RABGGTB'	'MSH4';'RABGGTB'	protein_coding	15254	1	76265000	76270000		'MSH4';'RABGGTB'	protein_coding	5000	320	36.7368
152880	4	73915000	73920000	RP11-352E8.2'	'COX18';'RP11-352E8.2'	noncoding_lncRNA_lincRNA;protein_coding	152879	4	73910000	73915000				5000	62	7.78445
152923	4	74130000	74135000	SNORA3'	'RP11-692D12.1'	noncoding_lncRNA_divergent	152919	4	74110000	74115000		'ANKRD17'	protein_coding	20000	8	5.07598
152950	4	74265000	74270000	ALB'	'ALB';'CATG00000072789.1'	noncoding_short_ncRNA;protein_coding	152948	4	74255000	74260000		'ALB';'CATG00000072789.1'	noncoding_short_ncRNA;protein_coding	10000	39	20.7487
15296	1	76475000	76480000	RP11-550H2.1'	'MSH4';'RP11-550H2.1'	noncoding_lncRNA_lincRNA;protein_coding	15295	1	76470000	76475000		'MSH4'	protein_coding	5000	226	36.7368
152956	4	74295000	74300000	AFP'			152962	4	74325000	74330000				30000	9	9.39916
152960	4	74315000	74320000	AFP'	'AFP'	protein_coding	152962	4	74325000	74330000				10000	36	19.5644
152969	4	74360000	74365000	AFM'	'AFM'	protein_coding	152970	4	74365000	74370000		'AFM'	protein_coding	5000	65	7.62919
152972	4	74375000	74380000	RP11-622A1.2'	'RP11-622A1.2'	noncoding_lncRNA_intergenic	152970	4	74365000	74370000		'AFM'	protein_coding	10000	30	13.1241
152994	4	74485000	74490000	RASSF6'	'RASSF6'	protein_coding	152993	4	74480000	74485000		'RASSF6'	protein_coding	5000	70	7.80974
153012	4	74575000	74580000	AC112518.3'	'AC112518.3';'CATG00000072794.1';'CATG00000072798.1';'IL8'	noncoding_lncRNA_intergenic;noncoding_lncRNA_noncoding_sense_intronic;protein_coding	153010	4	74565000	74570000		'CATG00000072794.1';'CATG00000072797.1'	noncoding_lncRNA_intergenic;noncoding_lncRNA_noncoding_sense_intronic	10000	65	35.3505
153040	4	74715000	74720000	PF4V1'	'PF4V1';'PPBPP1'	noncoding_pseudogene;protein_coding	153038	4	74705000	74710000		'CXCL6'	protein_coding	10000	55	29.874
15308	1	76535000	76540000	ST6GALNAC3'	'CATG00000063349.1'	noncoding_lncRNA_divergent	15306	1	76525000	76530000		'RP11-550H2.2'	noncoding_lncRNA_intergenic	10000	18	6.83783
153321	4	76120000	76125000	RP11-598G2.1'	'CATG00000072837.1';'RP11-598G2.1'	noncoding_lncRNA_intergenic;noncoding_pseudogene	153323	4	76130000	76135000		'CATG00000072837.1'	noncoding_lncRNA_intergenic	10000	31	16.3131
153381	4	76420000	76425000	RCHY1'	'RCHY1'	protein_coding	153379	4	76410000	76415000		'RCHY1'	protein_coding	10000	16	4.73945
153383	4	76430000	76435000	RCHY1'	'RCHY1'	protein_coding	153382	4	76425000	76430000		'RCHY1'	protein_coding	5000	94	15.4915
153384	4	76435000	76440000	RCHY1';THAP6'	'RCHY1';'THAP6'	protein_coding	153385	4	76440000	76445000	RCHY1';THAP6'	'THAP6'	protein_coding	5000	159	29.7727
153426	4	76645000	76650000	G3BP2';USO1'	'G3BP2';'USO1'	protein_coding	153427	4	76650000	76655000	G3BP2';USO1'	'G3BP2';'USO1'	protein_coding	5000	139	32.3548
153468	4	76855000	76860000	NAAA'	'NAAA'	protein_coding	153470	4	76865000	76870000		'SDAD1'	protein_coding	10000	24	8.43205
153471	4	76870000	76875000	AC110615.1'	'AC110615.1';'SDAD1'	protein_coding	153470	4	76865000	76870000		'SDAD1'	protein_coding	5000	67	8.33986
153471	4	76870000	76875000	AC110615.1'	'AC110615.1';'SDAD1'	protein_coding	153475	4	76890000	76895000	SDAD1'	'SDAD1'	protein_coding	20000	13	11.2709
153483	4	76930000	76935000	ART3'	'ART3'	protein_coding	153484	4	76935000	76940000		'ART3'	protein_coding	5000	46	5.3003
153495	4	76990000	76995000	ART3'	'ART3'	protein_coding	153498	4	77005000	77010000		'ART3'	protein_coding	15000	41	30.9906
153505	4	77040000	77045000	NUP54'	'NUP54'	protein_coding	153507	4	77050000	77055000	NUP54'	'NUP54'	protein_coding	10000	23	9.44433
153510	4	77065000	77070000	NUP54'	'CATG00000068989.1';'NUP54'	noncoding_lncRNA_divergent;protein_coding	153511	4	77070000	77075000	NUP54'	'CATG00000068989.1'	noncoding_lncRNA_divergent	5000	65	7.11207
153520	4	77115000	77120000	SCARB2'	'SCARB2'	protein_coding	153519	4	77110000	77115000		'SCARB2'	protein_coding	5000	192	34.7909
153520	4	77115000	77120000	SCARB2'	'SCARB2'	protein_coding	153521	4	77120000	77125000		'SCARB2'	protein_coding	5000	71	8.90862
153533	4	77180000	77185000	FAM47E-STBD1'	'FAM47E';'FAM47E-STBD1'	protein_coding	153537	4	77200000	77205000	FAM47E'	'FAM47E';'FAM47E-STBD1'	protein_coding	20000	20	21.1833
153537	4	77200000	77205000	FAM47E'	'FAM47E';'FAM47E-STBD1'	protein_coding	153541	4	77220000	77225000		'FAM47E';'FAM47E-STBD1'	protein_coding	20000	10	8.04181
153554	4	77285000	77290000	CCDC158'	'CCDC158'	protein_coding	153555	4	77290000	77295000		'CCDC158'	protein_coding	5000	79	10.2811
15357	1	76780000	76785000	ST6GALNAC3'	'ST6GALNAC3'	protein_coding	15364	1	76815000	76820000	RP11-335E14.1'	'RP11-335E14.1';'ST6GALNAC3'	noncoding_pseudogene;protein_coding	35000	7	6.85739
153592	4	77475000	77480000	SHROOM3'	'SHROOM3'	protein_coding	153590	4	77465000	77470000		'SHROOM3'	protein_coding	10000	26	11.4388
153592	4	77475000	77480000	SHROOM3'	'SHROOM3'	protein_coding	153593	4	77480000	77485000		'SHROOM3'	protein_coding	5000	79	12.5862
153598	4	77505000	77510000	SHROOM3'	'SHROOM3'	protein_coding	153599	4	77510000	77515000		'SHROOM3'	protein_coding	5000	57	5.27005
153619	4	77610000	77615000	SHROOM3'	'SHROOM3'	protein_coding	153617	4	77600000	77605000		'SHROOM3'	protein_coding	10000	26	11.1733
153622	4	77625000	77630000	SHROOM3'	'SHROOM3'	protein_coding	153621	4	77620000	77625000		'SHROOM3'	protein_coding	5000	84	13.7834
153633	4	77680000	77685000	RP11-359D14.2'	'RP11-359D14.3';'SHROOM3'	noncoding_lncRNA_noncoding_antisense;protein_coding	153631	4	77670000	77675000		'SHROOM3'	protein_coding	10000	32	13.9688
153658	4	77805000	77810000	RP11-123J14.4'	'RP11-123J14.4';'SOWAHB'	noncoding_pseudogene;protein_coding	153657	4	77800000	77805000		'SOWAHB'	protein_coding	5000	87	15.7327
153660	4	77815000	77820000	SOWAHB'	'SEPT11';'SOWAHB'	protein_coding	153657	4	77800000	77805000		'SOWAHB'	protein_coding	15000	19	13.3411
153658	4	77805000	77810000	RP11-123J14.4'	'RP11-123J14.4';'SOWAHB'	noncoding_pseudogene;protein_coding	153660	4	77815000	77820000	SOWAHB'	'SEPT11';'SOWAHB'	protein_coding	10000	27	13.7014
153670	4	77865000	77870000	40787'	'CATG00000072866.1';'SEPT11'	noncoding_lncRNA_divergent;protein_coding	153669	4	77860000	77865000		'CATG00000072866.1';'SEPT11'	noncoding_lncRNA_divergent;protein_coding	5000	52	6.54852
153672	4	77875000	77880000	TXNP6'	'SEPT11'	protein_coding	153669	4	77860000	77865000		'CATG00000072866.1';'SEPT11'	noncoding_lncRNA_divergent;protein_coding	15000	9	4.66675
153670	4	77865000	77870000	40787'	'CATG00000072866.1';'SEPT11'	noncoding_lncRNA_divergent;protein_coding	153672	4	77875000	77880000	TXNP6'	'SEPT11'	protein_coding	10000	28	12.6665
153672	4	77875000	77880000	TXNP6'	'SEPT11'	protein_coding	153676	4	77895000	77900000		'CATG00000069007.1';'SEPT11'	noncoding_short_ncRNA;protein_coding	20000	18	18.1473
153678	4	77905000	77910000	40787'	'SEPT11'	protein_coding	153677	4	77900000	77905000		'SEPT11'	protein_coding	5000	109	18.4662
153678	4	77905000	77910000	40787'	'SEPT11'	protein_coding	153679	4	77910000	77915000		'SEPT11'	protein_coding	5000	85	14.4745
153682	4	77925000	77930000	40787'	'CATG00000072868.1';'SEPT11'	noncoding_lncRNA_divergent;protein_coding	153681	4	77920000	77925000		'CATG00000072868.1';'SEPT11'	noncoding_lncRNA_divergent;protein_coding	5000	110	15.496
153683	4	77930000	77935000	40787'	'SEPT11'	protein_coding	153684	4	77935000	77940000	40787'	'SEPT11'	protein_coding	5000	129	20.1157
153688	4	77955000	77960000	40787'	'SEPT11'	protein_coding	153691	4	77970000	77975000		'CATG00000072873.1';'CCNI'	noncoding_lncRNA_noncoding_sense_intronic;protein_coding	15000	17	12.5517
153692	4	77975000	77980000	CCNI'	'CCNI'	protein_coding	153691	4	77970000	77975000		'CATG00000072873.1';'CCNI'	noncoding_lncRNA_noncoding_sense_intronic;protein_coding	5000	107	22.9181
153692	4	77975000	77980000	CCNI'	'CCNI'	protein_coding	153693	4	77980000	77985000	CCNI'	'CCNI'	protein_coding	5000	49	5.16786
153693	4	77980000	77985000	CCNI'	'CCNI'	protein_coding	153695	4	77990000	77995000	CCNI'	'CCNI'	protein_coding	10000	20	8.82545
153711	4	78070000	78075000	RNU6-1187P'	'RNU6-1187P'	noncoding_snRNA	153710	4	78065000	78070000				5000	45	4.98755
153713	4	78080000	78085000	CCNG2'	'CCNG2'	protein_coding	153714	4	78085000	78090000		'CCNG2'	protein_coding	5000	221	36.7368
153854	4	78785000	78790000	MRPL1';RP13-488H8.1'	'MRPL1';'RP13-488H8.1'	noncoding_pseudogene;protein_coding	153857	4	78800000	78805000	MRPL1'	'MRPL1'	protein_coding	15000	10	6.88359
153881	4	78920000	78925000	RP11-777B9.4'	'RP11-777B9.4'	noncoding_pseudogene	153884	4	78935000	78940000				15000	10	4.70543
153883	4	78930000	78935000	RP11-777B9.5'			153884	4	78935000	78940000				5000	102	19.2214
153956	4	79295000	79300000	MINOS1P4'	'FRAS1'	protein_coding	153954	4	79285000	79290000		'FRAS1'	protein_coding	10000	28	11.7688
153991	4	79470000	79475000	ANXA3'	'ANXA3'	protein_coding	153993	4	79480000	79485000		'ANXA3'	protein_coding	10000	13	4.7936
154001	4	79520000	79525000	ANXA3'	'ANXA3'	protein_coding	154002	4	79525000	79530000		'ANXA3';'CATG00000072904.1'	noncoding_lncRNA_noncoding_antisense;protein_coding	5000	189	36.7368
154010	4	79565000	79570000	HIGD1AP13';LINC01094'	'CATG00000072906.1';'RP11-792D21.2'	noncoding_lncRNA_intergenic	154008	4	79555000	79560000				10000	18	6.64633
154035	4	79690000	79695000	RP11-109G23.1';RP11-109G23.3'	'RP11-109G23.3'	noncoding_lncRNA_divergent	154041	4	79720000	79725000		'BMP2K'	protein_coding	30000	5	6.18642
154066	4	79845000	79850000	PAQR3'	'BMP2K';'PAQR3'	protein_coding	154069	4	79860000	79865000	PAQR3'	'LINC01088';'PAQR3'	noncoding_lncRNA_intergenic;protein_coding	15000	25	21.0668
154120	4	80115000	80120000	LINC01088'	'LINC01088';'NAA11'	noncoding_lncRNA_intergenic;protein_coding	154123	4	80130000	80135000	LINC01088'	'LINC01088';'NAA11'	noncoding_lncRNA_intergenic;protein_coding	15000	10	5.08306
154200	4	80515000	80520000	RP11-234K19.1'	'LINC00989';'RP11-234K19.1'	noncoding_lncRNA_intergenic;noncoding_lncRNA_lincRNA	154199	4	80510000	80515000		'LINC00989'	noncoding_lncRNA_intergenic	5000	117	18.9356
154200	4	80515000	80520000	RP11-234K19.1'	'LINC00989';'RP11-234K19.1'	noncoding_lncRNA_intergenic;noncoding_lncRNA_lincRNA	154201	4	80520000	80525000		'LINC00989'	noncoding_lncRNA_intergenic	5000	93	13.9642
154213	4	80580000	80585000	RP11-452C8.1'	'RP11-452C8.1'	noncoding_lncRNA_intergenic	154212	4	80575000	80580000				5000	54	4.89953
15444	1	77215000	77220000	RNU6-161P'	'RNU6-161P'	noncoding_snRNA	15445	1	77220000	77225000		'RP11-415A20.1'	noncoding_lncRNA_lincRNA	5000	140	21.6143
15467	1	77330000	77335000	ST6GALNAC5'	'CATG00000063416.1';'ST6GALNAC5'	noncoding_lncRNA_noncoding_antisense;protein_coding	15465	1	77320000	77325000		'CATG00000063416.1'	noncoding_lncRNA_noncoding_antisense	10000	32	14.9511
154752	4	83275000	83280000	HNRNPD'	'HNRNPD'	protein_coding	154751	4	83270000	83275000		'HNRNPD'	protein_coding	5000	51	6.27635
154753	4	83280000	83285000	HNRNPD'	'HNRNPD'	protein_coding	154754	4	83285000	83290000		'HNRNPD'	protein_coding	5000	59	6.34226
154793	4	83480000	83485000	TMEM150C'	'CATG00000069190.1';'TMEM150C'	noncoding_lncRNA_divergent;protein_coding	154791	4	83470000	83475000		'TMEM150C'	protein_coding	10000	14	5.11629
154855	4	83790000	83795000	SEC31A'	'CATG00000069204.1';'SEC31A'	noncoding_short_ncRNA;protein_coding	154857	4	83800000	83805000	SEC31A'	'CATG00000069205.1';'SEC31A';'THAP9-AS1'	noncoding_lncRNA_divergent;noncoding_short_ncRNA;protein_coding	10000	13	4.77217
154857	4	83800000	83805000	SEC31A'	'CATG00000069205.1';'SEC31A';'THAP9-AS1'	noncoding_lncRNA_divergent;noncoding_short_ncRNA;protein_coding	154858	4	83805000	83810000		'SEC31A';'THAP9-AS1'	noncoding_lncRNA_divergent;protein_coding	5000	165	36.7368
154882	4	83925000	83930000	RNU6-615P'	'LIN54'	protein_coding	154883	4	83930000	83935000	LIN54'	'CATG00000069208.1';'LIN54'	noncoding_lncRNA_divergent;protein_coding	5000	44	4.99449
154887	4	83950000	83955000	COPS4'			154888	4	83955000	83960000	COPS4'	'CATG00000072989.1';'COPS4'	noncoding_lncRNA_divergent;protein_coding	5000	59	6.45744
154937	4	84200000	84205000	COQ2'	'COQ2'	protein_coding	154938	4	84205000	84210000	COQ2'	'CATG00000069224.1';'COQ2'	noncoding_lncRNA_divergent;protein_coding	5000	89	13.6679
155000	4	84515000	84520000	AGPAT9'	'AGPAT9'	protein_coding	155002	4	84525000	84530000		'AGPAT9'	protein_coding	10000	33	15.228
15528	1	77635000	77640000	PIGK'	'PIGK'	protein_coding	15526	1	77625000	77630000		'PIGK'	protein_coding	10000	29	10.1853
15528	1	77635000	77640000	PIGK'	'PIGK'	protein_coding	15529	1	77640000	77645000		'PIGK'	protein_coding	5000	187	34.6574
15532	1	77655000	77660000	RP11-363H12.1'	'PIGK'	protein_coding	15530	1	77645000	77650000		'PIGK'	protein_coding	10000	58	26.9511
155436	4	86695000	86700000	ARHGAP24'	'ARHGAP24'	protein_coding	155437	4	86700000	86705000	ARHGAP24'	'ARHGAP24'	protein_coding	5000	101	15.6684
155465	4	86840000	86845000	ARHGAP24'	'ARHGAP24'	protein_coding	155461	4	86820000	86825000		'ARHGAP24'	protein_coding	20000	20	23.0429
155551	4	87270000	87275000	MAPK10'	'MAPK10'	protein_coding	155549	4	87260000	87265000		'MAPK10'	protein_coding	10000	25	11.0436
155553	4	87280000	87285000	MAPK10'	'MAPK10'	protein_coding	155554	4	87285000	87290000		'MAPK10'	protein_coding	5000	63	8.73597
155599	4	87510000	87515000	MAPK10';PTPN13'	'MAPK10'	protein_coding	155600	4	87515000	87520000	MAPK10';PTPN13'	'MAPK10';'PTPN13'	protein_coding	5000	130	31.839
155650	4	87765000	87770000	SLC10A6'	'SLC10A6'	protein_coding	155648	4	87755000	87760000		'SLC10A6'	protein_coding	10000	15	4.94443
155670	4	87865000	87870000	TECRP1'	'AFF1'	protein_coding	155669	4	87860000	87865000		'AFF1'	protein_coding	5000	215	36.7368
155670	4	87865000	87870000	TECRP1'	'AFF1'	protein_coding	155671	4	87870000	87875000	TECRP1'	'AFF1';'TECRP1'	noncoding_pseudogene;protein_coding	5000	48	4.87975
155682	4	87925000	87930000	AFF1'	'AFF1'	protein_coding	155683	4	87930000	87935000		'AFF1'	protein_coding	5000	49	4.8851
155691	4	87970000	87975000	AFF1'	'AFF1'	protein_coding	155692	4	87975000	87980000		'AFF1'	protein_coding	5000	48	4.80557
155729	4	88160000	88165000	KLHL8'	'KLHL8'	protein_coding	155731	4	88170000	88175000				10000	27	11.9762
155734	4	88185000	88190000	RP11-529H2.1'	'RP11-529H2.1'	noncoding_lncRNA_lincRNA	155736	4	88195000	88200000		'CATG00000069313.1'	noncoding_lncRNA_intergenic	10000	18	6.65008
155741	4	88220000	88225000	MIR5705'	'HSD17B13';'MIR5705'	noncoding_miRNA;protein_coding	155740	4	88215000	88220000				5000	289	36.7368
155741	4	88220000	88225000	MIR5705'	'HSD17B13';'MIR5705'	noncoding_miRNA;protein_coding	155742	4	88225000	88230000		'HSD17B13'	protein_coding	5000	59	6.14977
155763	4	88330000	88335000	RP11-710E1.1';Y_RNA'	'RP11-710E1.1';'Y_RNA'	noncoding_misc_RNA;noncoding_pseudogene	155764	4	88335000	88340000				5000	66	8.10524
155765	4	88340000	88345000	NUDT9'	'NUDT9'	protein_coding	155764	4	88335000	88340000				5000	91	17.8175
155811	4	88570000	88575000	DMP1'	'DMP1';'RP11-742B18.1'	noncoding_lncRNA_intergenic;protein_coding	155812	4	88575000	88580000		'DMP1';'RP11-742B18.1'	noncoding_lncRNA_intergenic;protein_coding	5000	132	20.1688
155881	4	88920000	88925000	RNU1-36P'	'CATG00000073068.1';'RNU1-36P'	noncoding_lncRNA_divergent;noncoding_small_RNA	155882	4	88925000	88930000	PKD2'	'CATG00000073068.1';'PKD2'	noncoding_lncRNA_divergent;protein_coding	5000	68	8.76916
155883	4	88930000	88935000	PKD2'	'PKD2'	protein_coding	155884	4	88935000	88940000		'PKD2'	protein_coding	5000	52	5.3863
155888	4	88955000	88960000	PKD2'	'PKD2'	protein_coding	155889	4	88960000	88965000	PKD2'	'PKD2'	protein_coding	5000	64	8.85177
155925	4	89140000	89145000	RP11-147K6.2'	'ABCG2';'RP11-147K6.2'	noncoding_pseudogene;protein_coding	155924	4	89135000	89140000		'ABCG2'	protein_coding	5000	135	22.9124
155936	4	89195000	89200000	PPM1K';RNU6-112P'	'PPM1K';'RNU6-112P'	noncoding_snRNA;protein_coding	155939	4	89210000	89215000		'RP11-10L7.1'	noncoding_lncRNA_divergent	15000	21	16.3485
156002	4	89525000	89530000	HERC3'	'HERC3'	protein_coding	156003	4	89530000	89535000		'HERC3'	protein_coding	5000	56	5.90502
156012	4	89575000	89580000	HERC3'	'HERC3'	protein_coding	156010	4	89565000	89570000		'HERC3'	protein_coding	10000	20	6.83316
156012	4	89575000	89580000	HERC3'	'HERC3'	protein_coding	156014	4	89585000	89590000	HERC3'	'HERC3'	protein_coding	10000	20	6.02408
156013	4	89580000	89585000	HERC3'	'HERC3'	protein_coding	156014	4	89585000	89590000	HERC3'	'HERC3'	protein_coding	5000	189	36.7368
156023	4	89630000	89635000	FAM13A-AS1'	'CATG00000073086.1';'HERC3'	noncoding_lncRNA_intergenic;protein_coding	156024	4	89635000	89640000		'FAM13A';'FAM13A-AS1'	noncoding_lncRNA_intergenic;protein_coding	5000	95	14.5009
156030	4	89665000	89670000	FAM13A'	'FAM13A'	protein_coding	156032	4	89675000	89680000	FAM13A'	'FAM13A'	protein_coding	10000	17	6.4799
156034	4	89685000	89690000	FAM13A'	'FAM13A'	protein_coding	156035	4	89690000	89695000	FAM13A'	'FAM13A'	protein_coding	5000	56	6.52467
156045	4	89740000	89745000	FAM13A'	'FAM13A'	protein_coding	156044	4	89735000	89740000		'FAM13A'	protein_coding	5000	364	36.7368
156086	4	89945000	89950000	FAM13A'	'FAM13A'	protein_coding	156044	4	89735000	89740000		'FAM13A'	protein_coding	210000	5	6.60781
156092	4	89975000	89980000	FAM13A'	'FAM13A'	protein_coding	156091	4	89970000	89975000		'FAM13A'	protein_coding	5000	61	8.3215
15611	1	78050000	78055000	ZZZ3'	'ZZZ3'	protein_coding	15614	1	78065000	78070000		'ZZZ3'	protein_coding	15000	14	9.07471
15623	1	78110000	78115000	RN7SL370P'	'RN7SL370P';'ZZZ3'	noncoding_misc_RNA;protein_coding	15628	1	78135000	78140000		'ZZZ3'	protein_coding	25000	8	8.97148
156271	4	90870000	90875000	MMRN1'	'MMRN1'	protein_coding	156269	4	90860000	90865000		'MMRN1'	protein_coding	10000	35	18.5448
15643	1	78210000	78215000	USP33'	'USP33'	protein_coding	15642	1	78205000	78210000		'USP33'	protein_coding	5000	85	10.9038
15643	1	78210000	78215000	USP33'	'USP33'	protein_coding	15646	1	78225000	78230000	USP33'	'CATG00000004973.1';'USP33'	noncoding_lncRNA_divergent;protein_coding	15000	12	8.34855
156448	4	91755000	91760000	TMSB4XP8'	'CATG00000069391.1';'CCSER1';'TMSB4XP8'	noncoding_lncRNA_divergent;noncoding_pseudogene;protein_coding	156450	4	91765000	91770000		'CCSER1'	protein_coding	10000	25	9.94548
15649	1	78240000	78245000	FAM73A';RNA5SP21';RP4-706L14.2'	'RP4-706L14.2'	noncoding_pseudogene	15650	1	78245000	78250000	FAM73A';RNA5SP21'	'FAM73A';'RNA5SP21'	protein_coding;structural_RNA	5000	65	7.90766
15649	1	78240000	78245000	FAM73A';RNA5SP21';RP4-706L14.2'	'RP4-706L14.2'	noncoding_pseudogene	15660	1	78295000	78300000		'FAM73A'	protein_coding	55000	5	6.18367
15654	1	78265000	78270000	FAM73A'	'FAM73A'	protein_coding	15651	1	78250000	78255000		'FAM73A'	protein_coding	15000	21	15.4285
15663	1	78310000	78315000	NSRP1P1'	'FAM73A';'NSRP1P1'	noncoding_pseudogene;protein_coding	15660	1	78295000	78300000		'FAM73A'	protein_coding	15000	29	22.0896
15686	1	78425000	78430000	FUBP1'	'FUBP1'	protein_coding	15687	1	78430000	78435000		'FUBP1'	protein_coding	5000	63	8.44396
15690	1	78445000	78450000	DNAJB4';FUBP1';GIPC2'	'DNAJB4';'FUBP1';'GIPC2';'RP11-386I14.4'	noncoding_lncRNA_divergent;protein_coding	15693	1	78460000	78465000		'DNAJB4';'GIPC2';'RP11-386I14.4'	noncoding_lncRNA_divergent;protein_coding	15000	8	4.8131
15711	1	78550000	78555000	RNU6-1102P'	'GIPC2';'RNU6-1102P'	noncoding_snRNA;protein_coding	15712	1	78555000	78560000	RNA5SP22';RNU6-1102P';RP11-386I14.3'	'GIPC2';'RP11-386I14.3'	noncoding_pseudogene;protein_coding	5000	61	5.52791
15713	1	78560000	78565000	RNA5SP22'	'GIPC2';'RNA5SP22'	noncoding_rRNA;protein_coding	15716	1	78575000	78580000		'GIPC2'	protein_coding	15000	16	9.73028
157149	4	95260000	95265000	HPGDS'	'CATG00000069500.1';'HPGDS'	noncoding_lncRNA_divergent;protein_coding	157147	4	95250000	95255000		'HPGDS'	protein_coding	10000	21	7.27268
157149	4	95260000	95265000	HPGDS'	'CATG00000069500.1';'HPGDS'	noncoding_lncRNA_divergent;protein_coding	157150	4	95265000	95270000		'CATG00000069500.1';'CATG00000073165.1';'HPGDS'	noncoding_lncRNA_divergent;noncoding_lncRNA_intergenic;protein_coding	5000	82	11.4264
157154	4	95285000	95290000	RP11-398J16.1'	'HPGDS'	protein_coding	157155	4	95290000	95295000	RP11-398J16.1'	'HPGDS';'RP11-398J16.1'	noncoding_pseudogene;protein_coding	5000	209	36.7368
157185	4	95440000	95445000	PDLIM5'	'PDLIM5'	protein_coding	157183	4	95430000	95435000		'PDLIM5'	protein_coding	10000	43	20.5321
157185	4	95440000	95445000	PDLIM5'	'PDLIM5'	protein_coding	157186	4	95445000	95450000	PDLIM5'	'PDLIM5'	protein_coding	5000	126	20.3648
157280	4	95915000	95920000	BMPR1B'	'BMPR1B'	protein_coding	157279	4	95910000	95915000		'BMPR1B'	protein_coding	5000	86	12.5942
157299	4	96010000	96015000	BMPR1B'	'BMPR1B'	protein_coding	157298	4	96005000	96010000		'BMPR1B'	protein_coding	5000	45	4.95602
157301	4	96020000	96025000	BMPR1B'	'BMPR1B'	protein_coding	157300	4	96015000	96020000		'BMPR1B'	protein_coding	5000	55	6.01754
157301	4	96020000	96025000	BMPR1B'	'BMPR1B'	protein_coding	157302	4	96025000	96030000	BMPR1B'	'BMPR1B'	protein_coding	5000	106	17.8931
157302	4	96025000	96030000	BMPR1B'	'BMPR1B'	protein_coding	157303	4	96030000	96035000		'BMPR1B'	protein_coding	5000	305	36.7368
15740	1	78695000	78700000	RP11-183M13.1'	'RP11-183M13.1'	noncoding_lncRNA_intergenic	15738	1	78685000	78690000		'RP11-183M13.1'	noncoding_lncRNA_intergenic	10000	38	18.5413
15769	1	78840000	78845000	RNA5SP23'	'PTGFR';'RNA5SP23'	noncoding_rRNA;protein_coding	15765	1	78820000	78825000		'PTGFR';'RP11-183M13.1'	noncoding_lncRNA_intergenic;protein_coding	20000	8	4.83059
15769	1	78840000	78845000	RNA5SP23'	'PTGFR';'RNA5SP23'	noncoding_rRNA;protein_coding	15766	1	78825000	78830000		'PTGFR';'RP11-183M13.1'	noncoding_lncRNA_intergenic;protein_coding	15000	21	14.3995
158029	4	99660000	99665000	BTF3P13'	'BTF3P13'	noncoding_pseudogene	158030	4	99665000	99670000				5000	55	5.41624
158076	4	99895000	99900000	NDUFS5P4'	'NDUFS5P4';'RP11-571L19.7'	noncoding_lncRNA_divergent;noncoding_pseudogene	158075	4	99890000	99895000		'RP11-571L19.7'	noncoding_lncRNA_divergent	5000	86	13.2096
158088	4	99955000	99960000	METAP1'	'METAP1'	protein_coding	158086	4	99945000	99950000		'METAP1'	protein_coding	10000	16	6.61682
158192	4	100475000	100480000	TRMT10A'	'TRMT10A'	protein_coding	158194	4	100485000	100490000	MTTP';TRMT10A'	'MTTP';'TRMT10A'	protein_coding	10000	23	8.93776
158254	4	100785000	100790000	DAPP1'	'DAPP1'	protein_coding	158252	4	100775000	100780000		'DAPP1'	protein_coding	10000	24	8.87513
158254	4	100785000	100790000	DAPP1'	'DAPP1'	protein_coding	158256	4	100795000	100800000		'LAMTOR3'	protein_coding	10000	26	11.5575
15827	1	79130000	79135000	RP4-641G12.3'	'IFI44';'RP4-641G12.3'	noncoding_pseudogene;protein_coding	15828	1	79135000	79140000		'CATG00000005016.1'	noncoding_lncRNA_intergenic	5000	61	7.98622
158283	4	100930000	100935000	RP11-15B17.1'	'RP11-15B17.1'	noncoding_lncRNA_divergent	158285	4	100940000	100945000		'RP11-15B17.1'	noncoding_lncRNA_divergent	10000	22	8.75309
158443	4	101730000	101735000	EMCN-IT1'	'EMCN';'EMCN-IT1'	noncoding_sense_intronic;protein_coding	158521	4	102120000	102125000		'PPP3CA'	protein_coding	390000	13	21.5704
158513	4	102080000	102085000	PPP3CA'	'PPP3CA'	protein_coding	158511	4	102070000	102075000		'PPP3CA'	protein_coding	10000	46	24.7055
158675	4	102890000	102895000	MTND5P5'	'BANK1';'MTND5P5'	noncoding_pseudogene;protein_coding	158673	4	102880000	102885000		'BANK1'	protein_coding	10000	17	6.0468
158767	4	103350000	103355000	RP11-499E18.1';SLC39A8'	'RP11-499E18.1';'SLC39A8'	noncoding_lncRNA_noncoding_sense_intronic;protein_coding	158768	4	103355000	103360000				5000	60	8.65635
158781	4	103420000	103425000	AF213884.2';NFKB1'	'AF213884.2';'NFKB1'	noncoding_lncRNA_divergent;protein_coding	158784	4	103435000	103440000		'NFKB1'	protein_coding	15000	16	13.2914
158788	4	103455000	103460000	NFKB1'	'NFKB1'	protein_coding	158787	4	103450000	103455000		'NFKB1'	protein_coding	5000	53	5.19558
158796	4	103495000	103500000	NFKB1'	'MANBA';'NFKB1'	protein_coding	158795	4	103490000	103495000		'MANBA';'NFKB1'	protein_coding	5000	61	12.0635
158799	4	103510000	103515000	NFKB1'	'MANBA';'NFKB1'	protein_coding	158801	4	103520000	103525000		'MANBA';'NFKB1'	protein_coding	10000	23	10.2321
158827	4	103650000	103655000	KRT8P46';LRRC37A15P';RP11-10L12.1'	'KRT8P46';'LRRC37A15P';'MANBA'	noncoding_pseudogene;protein_coding	158828	4	103655000	103660000	RP11-10L12.1'	'MANBA';'RP11-10L12.1'	noncoding_pseudogene;protein_coding	5000	115	24.1218
158841	4	103720000	103725000	UBE2D3'	'UBE2D3'	protein_coding	158843	4	103730000	103735000	UBE2D3'	'UBE2D3'	protein_coding	10000	16	5.36153
158842	4	103725000	103730000	UBE2D3'	'UBE2D3'	protein_coding	158843	4	103730000	103735000	UBE2D3'	'UBE2D3'	protein_coding	5000	54	6.93621
158884	4	103935000	103940000	SLC9B1'	'SLC9B1'	protein_coding	158883	4	103930000	103935000		'SLC9B1'	protein_coding	5000	50	4.63716
158884	4	103935000	103940000	SLC9B1'	'SLC9B1'	protein_coding	158885	4	103940000	103945000	SLC9B1'	'CATG00000069613.1';'SLC9B1';'SLC9B2'	noncoding_lncRNA_divergent;protein_coding	5000	81	13.6593
158966	4	104345000	104350000	RP11-328K4.1'	'RP11-328K4.1'	noncoding_lncRNA_intergenic	158964	4	104335000	104340000				10000	21	6.71385
158993	4	104480000	104485000	RP11-297P16.4'	'RP11-297P16.3';'RP11-297P16.4'	noncoding_antisense;noncoding_lncRNA_lincRNA	158994	4	104485000	104490000		'RP11-297P16.3'	noncoding_antisense	5000	137	21.8977
159274	4	105885000	105890000	RP11-556I14.2'	'RP11-556I14.1';'RP11-556I14.2'	noncoding_lncRNA_intergenic	159275	4	105890000	105895000	RNU6-351P';RP11-556I14.1'	'RP11-556I14.1';'RP11-556I14.2'	noncoding_lncRNA_intergenic	5000	48	6.07883
159407	4	106550000	106555000	ARHGEF38'	'ARHGEF38'	protein_coding	159408	4	106555000	106560000		'ARHGEF38'	protein_coding	5000	74	12.6462
159417	4	106600000	106605000	ARHGEF38';RP11-311D14.1'	'ARHGEF38';'INTS12';'RP11-311D14.1'	noncoding_pseudogene;protein_coding	159418	4	106605000	106610000	INTS12'	'CATG00000069660.1';'INTS12'	noncoding_lncRNA_noncoding_antisense;protein_coding	5000	43	6.77654
159420	4	106615000	106620000	ARHGEF38'	'CATG00000069660.1';'INTS12'	noncoding_lncRNA_noncoding_antisense;protein_coding	159421	4	106620000	106625000	ARHGEF38'	'CATG00000069660.1';'INTS12'	noncoding_lncRNA_noncoding_antisense;protein_coding	5000	78	12.2812
159422	4	106625000	106630000	GSTCD';INTS12'	'CATG00000069660.1';'GSTCD';'INTS12'	noncoding_lncRNA_noncoding_antisense;protein_coding	159423	4	106630000	106635000	GSTCD';INTS12'	'GSTCD';'INTS12'	protein_coding	5000	45	6.0176
159461	4	106820000	106825000	NPNT'	'NPNT'	protein_coding	159462	4	106825000	106830000		'NPNT'	protein_coding	5000	81	12.3106
159819	4	108610000	108615000	PAPSS1'	'PAPSS1'	protein_coding	159818	4	108605000	108610000		'PAPSS1'	protein_coding	5000	178	36.7368
159854	4	108785000	108790000	RNU6-733P'	'RNU6-733P';'RP11-286E11.1';'SGMS2'	noncoding_lncRNA_divergent;noncoding_snRNA;protein_coding	159853	4	108780000	108785000		'RP11-286E11.1';'SGMS2'	noncoding_lncRNA_divergent;protein_coding	5000	111	23.9112
159854	4	108785000	108790000	RNU6-733P'	'RNU6-733P';'RP11-286E11.1';'SGMS2'	noncoding_lncRNA_divergent;noncoding_snRNA;protein_coding	159856	4	108795000	108800000		'RP11-286E11.1';'SGMS2'	noncoding_lncRNA_divergent;protein_coding	10000	27	14.1859
159896	4	108995000	109000000	LEF1'	'HADH';'LEF1'	protein_coding	159893	4	108980000	108985000		'HADH';'LEF1'	protein_coding	15000	17	12.5315
159914	4	109085000	109090000	LEF1';LEF1-AS1'	'LEF1';'LEF1-AS1'	noncoding_lncRNA_intergenic;protein_coding	159951	4	109270000	109275000		'CATG00000073376.1'	noncoding_lncRNA_intergenic	185000	5	6.70467
159962	4	109325000	109330000	RPSAP34'	'RPSAP34'	noncoding_pseudogene	159959	4	109310000	109315000				15000	21	15.8708
160167	4	110350000	110355000	SEC24B';SEC24B-AS1'	'SEC24B';'SEC24B-AS1'	noncoding_lncRNA_divergent;protein_coding	160168	4	110355000	110360000	SEC24B';SEC24B-AS1'	'SEC24B'	protein_coding	5000	60	7.85056
160168	4	110355000	110360000	SEC24B';SEC24B-AS1'	'SEC24B'	protein_coding	160169	4	110360000	110365000		'SEC24B'	protein_coding	5000	261	36.7368
160171	4	110370000	110375000	RN7SL55P'	'RN7SL55P';'SEC24B'	noncoding_misc_RNA;protein_coding	160170	4	110365000	110370000		'SEC24B'	protein_coding	5000	154	31.0165
160220	4	110615000	110620000	CASP6'	'CASP6'	protein_coding	160221	4	110620000	110625000	CASP6'	'CASP6'	protein_coding	5000	61	9.88792
160254	4	110785000	110790000	LRIT3'	'LRIT3'	protein_coding	160255	4	110790000	110795000		'LRIT3'	protein_coding	5000	218	36.7368
160263	4	110830000	110835000	EGF'	'EGF'	protein_coding	160262	4	110825000	110830000				5000	93	14.8534
160390	4	111465000	111470000	ENPEP'	'ENPEP';'RP11-380D23.2'	noncoding_lncRNA_intergenic;protein_coding	160389	4	111460000	111465000		'ENPEP';'RP11-380D23.2'	noncoding_lncRNA_intergenic;protein_coding	5000	44	4.74294
1604	1	8015000	8020000	PARK7'	'PARK7'	protein_coding	1605	1	8020000	8025000	PARK7'	'PARK7'	protein_coding	5000	185	36.7368
160451	4	111770000	111775000	AC024198.1'	'AC024198.1'	noncoding_miRNA	160452	4	111775000	111780000	AC024198.1'			5000	41	5.25615
1605	1	8020000	8025000	PARK7'	'PARK7'	protein_coding	1608	1	8035000	8040000		'PARK7'	protein_coding	15000	22	16.5892
160726	4	113145000	113150000	RP11-73K9.2'			160725	4	113140000	113145000				5000	53	6.10408
160727	4	113150000	113155000	AP1AR';RP11-73K9.2'	'AP1AR';'RP11-73K9.2'	noncoding_lncRNA_divergent;protein_coding	160728	4	113155000	113160000		'AP1AR'	protein_coding	5000	63	9.61422
160734	4	113185000	113190000	AP1AR'	'AP1AR';'TIFA'	protein_coding	160737	4	113200000	113205000	TIFA'	'TIFA'	protein_coding	15000	9	5.61455
1609	1	8040000	8045000	Y_RNA'	'PARK7';'Y_RNA'	noncoding_misc_RNA;protein_coding	1608	1	8035000	8040000		'PARK7'	protein_coding	5000	52	5.78365
16112	1	80555000	80560000	RP11-339A11.1'	'RP11-339A11.1'	noncoding_pseudogene	16111	1	80550000	80555000				5000	165	23.7995
161200	4	115515000	115520000	UGT8'	'CATG00000073511.1';'UGT8'	noncoding_lncRNA_divergent;protein_coding	161201	4	115520000	115525000	UGT8'	'UGT8'	protein_coding	5000	66	9.39153
1615	1	8070000	8075000	ERRFI1'	'ERRFI1'	protein_coding	1613	1	8060000	8065000		'ERRFI1'	protein_coding	10000	19	8.8143
1616	1	8075000	8080000	ERRFI1'	'ERRFI1'	protein_coding	1617	1	8080000	8085000		'ERRFI1'	protein_coding	5000	81	15.3071
161697	4	118000000	118005000	TRAM1L1'	'TRAM1L1'	protein_coding	161698	4	118005000	118010000	TRAM1L1'	'TRAM1L1'	protein_coding	5000	50	7.89246
162086	4	119945000	119950000	SYNPO2'	'CATG00000073554.1';'SYNPO2'	noncoding_lncRNA_noncoding_antisense;protein_coding	162089	4	119960000	119965000		'SYNPO2'	protein_coding	15000	9	5.53874
16211	1	81050000	81055000	RP11-115A15.1'	'CATG00000063846.1';'RP11-115A15.1';'RP5-887A10.1'	noncoding_lncRNA_intergenic;noncoding_lncRNA_lincRNA	16212	1	81055000	81060000		'CATG00000063846.1';'RP5-887A10.1'	noncoding_lncRNA_intergenic	5000	182	34.945
162129	4	120160000	120165000	USP53'	'USP53'	protein_coding	162130	4	120165000	120170000		'USP53'	protein_coding	5000	99	16.2138
162148	4	120255000	120260000	KLHL2P1'	'KLHL2P1';'USP53'	noncoding_pseudogene;protein_coding	171325	4	166140000	166145000	KLHL2'	'KLHL2'	protein_coding	45885000	6	7.69009
162519	4	122110000	122115000	RNU6-948P'	'RNU6-948P';'TNIP3'	noncoding_snRNA;protein_coding	162517	4	122100000	122105000		'TNIP3'	protein_coding	10000	22	10.049
162645	4	122740000	122745000	CCNA2'	'CCNA2'	protein_coding	162644	4	122735000	122740000		'CCNA2';'EXOSC9'	protein_coding	5000	49	4.87875
162645	4	122740000	122745000	CCNA2'	'CCNA2'	protein_coding	162646	4	122745000	122750000	BBS7';CCNA2'	'BBS7';'CCNA2'	protein_coding	5000	100	17.9214
162715	4	123090000	123095000	KIAA1109'	'KIAA1109'	protein_coding	162713	4	123080000	123085000		'KIAA1109'	protein_coding	10000	29	15.2921
162846	4	123745000	123750000	AC021205.1';FGF2'	'AC021205.1';'CATG00000070052.1';'FGF2';'SPATA5'	noncoding_lncRNA_intergenic;noncoding_small_RNA;protein_coding	162849	4	123760000	123765000	RP11-170N16.2'	'FGF2';'RP11-170N16.2';'SPATA5'	noncoding_pseudogene;protein_coding	15000	25	22.9298
162857	4	123800000	123805000	RP11-170N16.3'	'FGF2';'NUDT6';'RP11-170N16.3';'SPATA5'	noncoding_antisense;protein_coding	162860	4	123815000	123820000		'FGF2';'NUDT6';'SPATA5'	protein_coding	15000	14	9.23516
162933	4	124180000	124185000	CTB-51E13.1'	'CTB-51E13.1';'SPATA5'	noncoding_pseudogene;protein_coding	162934	4	124185000	124190000		'SPATA5'	protein_coding	5000	59	7.59722
162979	4	124410000	124415000	RP11-381N20.2'	'RP11-93L9.1';'SPRY1'	noncoding_lncRNA_intergenic;protein_coding	162976	4	124395000	124400000		'CATG00000070075.1';'RP11-93L9.1';'SPRY1'	noncoding_lncRNA_intergenic;protein_coding	15000	12	9.0929
16310	1	81545000	81550000	MTND2P30'	'CATG00000063974.1';'MTND2P30'	noncoding_lncRNA_intergenic;noncoding_pseudogene	16309	1	81540000	81545000		'CATG00000063974.1'	noncoding_lncRNA_intergenic	5000	78	11.7759
16379	1	81890000	81895000	HNRNPA3P14'	'HNRNPA3P14';'LPHN2'	noncoding_pseudogene;protein_coding	16375	1	81870000	81875000		'LPHN2'	protein_coding	20000	26	25.842
163806	4	128545000	128550000	INTU'	'INTU'	protein_coding	163808	4	128555000	128560000	INTU'	'INTU'	protein_coding	10000	21	7.6543
163821	4	128620000	128625000	INTU'	'INTU'	protein_coding	163823	4	128630000	128635000		'INTU'	protein_coding	10000	17	5.6118
163837	4	128700000	128705000	HSPA4L'	'CATG00000073722.1';'HSPA4L'	noncoding_lncRNA_divergent;protein_coding	163839	4	128710000	128715000		'HSPA4L'	protein_coding	10000	24	11.5131
163844	4	128735000	128740000	HSPA4L'	'HSPA4L'	protein_coding	163845	4	128740000	128745000		'HSPA4L'	protein_coding	5000	60	8.77151
16394	1	81965000	81970000	RP5-837I24.1';RP5-837I24.6'	'LPHN2';'RP5-837I24.1'	noncoding_pseudogene;protein_coding	16397	1	81980000	81985000		'LPHN2';'RP5-837I24.2'	noncoding_antisense;protein_coding	15000	39	28.8034
163992	4	129475000	129480000	RP11-130C6.1'	'CATG00000070170.1'	noncoding_lncRNA_intergenic	163993	4	129480000	129485000				5000	62	10.9267
16413	1	82060000	82065000	RP5-837I24.5'	'LPHN2';'RP5-837I24.4';'RP5-837I24.5'	noncoding_antisense;noncoding_pseudogene;protein_coding	16406	1	82025000	82030000		'LPHN2'	protein_coding	35000	5	5.12417
164075	4	129890000	129895000	SCLT1'	'SCLT1'	protein_coding	164076	4	129895000	129900000		'SCLT1'	protein_coding	5000	45	5.35807
164099	4	130010000	130015000	C4orf33';SCLT1'	'C4orf33';'SCLT1'	protein_coding	164100	4	130015000	130020000	C4orf33';SCLT1'	'C4orf33'	protein_coding	5000	43	5.52897
16413	1	82060000	82065000	RP5-837I24.5'	'LPHN2';'RP5-837I24.4';'RP5-837I24.5'	noncoding_antisense;noncoding_pseudogene;protein_coding	16415	1	82070000	82075000		'LPHN2';'RP5-837I24.4'	noncoding_antisense;protein_coding	10000	43	19.5703
164142	4	130225000	130230000	RP11-419L4.1'	'RP11-419L4.1'	noncoding_lncRNA_lincRNA	164146	4	130245000	130250000		'CATG00000073743.1'	noncoding_lncRNA_intergenic	20000	25	26.5713
16433	1	82160000	82165000	LPHN2'	'LPHN2'	protein_coding	16434	1	82165000	82170000	LPHN2'	'LPHN2'	protein_coding	5000	170	34.2519
1650	1	8245000	8250000	RP11-431K24.2'	'RP11-431K24.1'	noncoding_lncRNA_divergent	1651	1	8250000	8255000	RP11-431K24.2'	'RP11-431K24.1';'RP11-431K24.2'	noncoding_lncRNA_divergent;noncoding_pseudogene	5000	80	11.0185
165165	4	135340000	135345000	RP11-400D2.3'	'CATG00000073842.1';'PES1P1'	noncoding_lncRNA_noncoding_antisense;noncoding_pseudogene	165166	4	135345000	135350000	RP11-400D2.3'	'CATG00000073842.1';'PES1P1';'RP11-400D2.3'	noncoding_lncRNA_lincRNA;noncoding_lncRNA_noncoding_antisense;noncoding_pseudogene	5000	87	12.8303
1656	1	8275000	8280000	RP11-431K24.4'	'RP11-431K24.1';'RP11-431K24.3';'RP11-431K24.4'	noncoding_lncRNA_divergent;noncoding_lncRNA_lincRNA	1652	1	8255000	8260000		'RP11-431K24.1'	noncoding_lncRNA_divergent	20000	9	7.87683
165723	4	138130000	138135000	RP11-138I17.1'	'RP11-138I17.1'	noncoding_lncRNA_intergenic	165724	4	138135000	138140000		'RP11-138I17.1'	noncoding_lncRNA_intergenic	5000	63	8.99192
165726	4	138145000	138150000	AC060835.1'	'AC060835.1';'RP11-138I17.1'	noncoding_lncRNA_intergenic;noncoding_miRNA	165724	4	138135000	138140000		'RP11-138I17.1'	noncoding_lncRNA_intergenic	10000	21	6.64827
165925	4	139140000	139145000	SLC7A11'	'SLC7A11'	protein_coding	165924	4	139135000	139140000		'SLC7A11'	protein_coding	5000	110	17.1218
165925	4	139140000	139145000	SLC7A11'	'SLC7A11'	protein_coding	165926	4	139145000	139150000	SLC7A11'	'SLC7A11'	protein_coding	5000	55	4.93454
165929	4	139160000	139165000	SLC7A11'	'CATG00000070304.1';'SLC7A11'	noncoding_lncRNA_divergent;protein_coding	165928	4	139155000	139160000		'SLC7A11'	protein_coding	5000	72	11.2563
166096	4	139995000	140000000	ELF2'	'ELF2'	protein_coding	166097	4	140000000	140005000	ELF2'	'ELF2'	protein_coding	5000	76	12.4982
166097	4	140000000	140005000	ELF2'	'ELF2'	protein_coding	166098	4	140005000	140010000	ELF2'	'ELF2'	protein_coding	5000	87	14.4643
166098	4	140005000	140010000	ELF2'	'ELF2'	protein_coding	166101	4	140020000	140025000	RN7SL382P'	'ELF2';'RN7SL382P'	noncoding_misc_RNA;protein_coding	15000	16	12.1448
166121	4	140120000	140125000	Y_RNA'	'CATG00000070323.1';'Y_RNA'	noncoding_lncRNA_divergent;noncoding_misc_RNA	166124	4	140135000	140140000		'CATG00000070323.1'	noncoding_lncRNA_divergent	15000	8	4.95314
166127	4	140150000	140155000	RNU6-506P'	'CATG00000070323.1';'RNU6-506P'	noncoding_lncRNA_divergent;noncoding_snRNA	166124	4	140135000	140140000		'CATG00000070323.1'	noncoding_lncRNA_divergent	15000	12	7.71185
166140	4	140215000	140220000	NDUFC1'	'CATG00000070326.1';'NDUFC1'	noncoding_lncRNA_divergent;protein_coding	166141	4	140220000	140225000	NAA15';NDUFC1'	'NAA15';'NDUFC1'	protein_coding	5000	100	18.8347
166259	4	140810000	140815000	MAML3'	'CATG00000070344.1';'MAML3'	noncoding_short_ncRNA;protein_coding	166261	4	140820000	140825000		'MAML3'	protein_coding	10000	52	26.8797
166306	4	141045000	141050000	RP11-392B6.1'	'MAML3';'RP11-392B6.1'	noncoding_lncRNA_noncoding_antisense;protein_coding	166308	4	141055000	141060000		'MAML3';'RP11-392B6.1'	noncoding_lncRNA_noncoding_antisense;protein_coding	10000	25	12.7239
166306	4	141045000	141050000	RP11-392B6.1'	'MAML3';'RP11-392B6.1'	noncoding_lncRNA_noncoding_antisense;protein_coding	166312	4	141075000	141080000	MAML3'	'MAML3'	protein_coding	30000	5	5.11225
166312	4	141075000	141080000	MAML3'	'MAML3'	protein_coding	166308	4	141055000	141060000		'MAML3';'RP11-392B6.1'	noncoding_lncRNA_noncoding_antisense;protein_coding	20000	7	5.55959
166312	4	141075000	141080000	MAML3'	'MAML3'	protein_coding	166313	4	141080000	141085000				5000	56	7.62844
166343	4	141230000	141235000	RP11-425I13.2'	'RP11-425I13.3';'SCOC'	noncoding_lncRNA_divergent;protein_coding	166342	4	141225000	141230000		'RP11-425I13.3';'SCOC'	noncoding_lncRNA_divergent;protein_coding	5000	73	10.399
166372	4	141375000	141380000	RP11-542P2.1'	'RP11-542P2.1'	protein_coding	166371	4	141370000	141375000		'RP11-542P2.1'	protein_coding	5000	121	21.0017
166372	4	141375000	141380000	RP11-542P2.1'	'RP11-542P2.1'	protein_coding	166373	4	141380000	141385000	RP11-542P2.1'	'RP11-542P2.1'	protein_coding	5000	99	13.6437
166388	4	141455000	141460000	ELMOD2'	'ELMOD2'	protein_coding	166384	4	141435000	141440000				20000	15	12.8875
166389	4	141460000	141465000	ELMOD2'	'ELMOD2'	protein_coding	166393	4	141480000	141485000		'UCP1'	protein_coding	20000	20	20.2922
166396	4	141495000	141500000	RN7SL152P'	'RN7SL152P'	noncoding_misc_RNA	166393	4	141480000	141485000		'UCP1'	protein_coding	15000	29	23.2831
166421	4	141620000	141625000	Y_RNA'	'TBC1D9';'Y_RNA'	noncoding_misc_RNA;protein_coding	166424	4	141635000	141640000		'RP11-102N12.2';'TBC1D9'	noncoding_lncRNA_noncoding_antisense;protein_coding	15000	9	6.24951
166491	4	141970000	141975000	RNF150'	'RNF150'	protein_coding	166494	4	141985000	141990000		'RNF150'	protein_coding	15000	12	9.82032
1671	1	8350000	8355000	RNU6-991P'	'CATG00000007143.1';'RNU6-991P'	noncoding_lncRNA_intergenic;noncoding_snRNA	1666	1	8325000	8330000		'CATG00000007143.1'	noncoding_lncRNA_intergenic	25000	6	4.85332
166784	4	143435000	143440000	INPP4B';RP11-223C24.2'	'INPP4B';'RP11-223C24.2'	noncoding_lncRNA_lincRNA;protein_coding	166785	4	143440000	143445000		'INPP4B';'RP11-223C24.2'	noncoding_lncRNA_lincRNA;protein_coding	5000	57	5.99064
166950	4	144265000	144270000	MIR3139';RP11-364L4.1'	'GAB1'	protein_coding	166951	4	144270000	144275000	RP11-364L4.1'	'GAB1';'RP11-364L4.1'	noncoding_pseudogene;protein_coding	5000	86	13.9084
166967	4	144350000	144355000	GAB1'	'GAB1'	protein_coding	166968	4	144355000	144360000	GAB1'	'GAB1'	protein_coding	5000	60	7.56557
166980	4	144415000	144420000	RP11-58H15.3'	'RP11-58H15.3'	noncoding_pseudogene	166975	4	144390000	144395000		'GAB1'	protein_coding	25000	6	5.11315
166981	4	144420000	144425000	RP11-58H15.3'			166982	4	144425000	144430000				5000	64	6.7803
167301	4	146020000	146025000	ABCE1';ANAPC10'	'ABCE1'	protein_coding	167302	4	146025000	146030000	ABCE1'	'ABCE1'	protein_coding	5000	98	14.5178
167378	4	146405000	146410000	SMAD1'	'SMAD1'	protein_coding	167381	4	146420000	146425000	SMAD1-AS2'	'RP11-301H24.3';'SMAD1'	noncoding_lncRNA_divergent;protein_coding	15000	11	6.03993
167381	4	146420000	146425000	SMAD1-AS2'	'RP11-301H24.3';'SMAD1'	noncoding_lncRNA_divergent;protein_coding	167382	4	146425000	146430000	SMAD1-AS2'	'SMAD1'	protein_coding	5000	50	5.69362
167389	4	146460000	146465000	SMAD1'	'SMAD1'	protein_coding	167390	4	146465000	146470000	SMAD1'	'SMAD1'	protein_coding	5000	120	27.8956
167450	4	146765000	146770000	ZNF827'	'ZNF827'	protein_coding	167451	4	146770000	146775000		'ZNF827'	protein_coding	5000	47	5.24542
167525	4	147140000	147145000	RP11-6L6.2'	'LSM6'	protein_coding	167526	4	147145000	147150000	RP11-6L6.2'	'LSM6';'RP11-6L6.2'	protein_coding	5000	64	6.44195
167668	4	147855000	147860000	RP11-292D4.2'	'RP11-292D4.2';'TTC29'	noncoding_lncRNA_noncoding_antisense;protein_coding	167671	4	147870000	147875000				15000	11	6.37236
167672	4	147875000	147880000	RP11-292D4.1'	'RP11-292D4.1'	noncoding_lncRNA_lincRNA	167671	4	147870000	147875000				5000	126	23.5555
167804	4	148535000	148540000	RP11-425A23.1';TMEM184C'	'RP11-425A23.1';'TMEM184C'	noncoding_lncRNA_divergent;protein_coding	167805	4	148540000	148545000		'TMEM184C'	protein_coding	5000	60	7.80003
167806	4	148545000	148550000	TMEM184C'	'TMEM184C'	protein_coding	167807	4	148550000	148555000	TMEM184C'	'TMEM184C'	protein_coding	5000	51	6.69745
167830	4	148665000	148670000	RNA5SP165'	'ARHGAP10';'RNA5SP165'	noncoding_rRNA;protein_coding	167831	4	148670000	148675000		'ARHGAP10'	protein_coding	5000	65	9.30862
167842	4	148725000	148730000	RN7SL254P'	'ARHGAP10'	protein_coding	167843	4	148730000	148735000	RN7SL254P'	'ARHGAP10';'RN7SL254P'	noncoding_misc_RNA;protein_coding	5000	65	9.49406
167864	4	148835000	148840000	RP11-315D13.1'	'ARHGAP10';'RP11-315D13.1'	noncoding_pseudogene;protein_coding	167866	4	148845000	148850000		'ARHGAP10'	protein_coding	10000	33	15.6098
167885	4	148940000	148945000	ARHGAP10'	'ARHGAP10'	protein_coding	167887	4	148950000	148955000		'ARHGAP10'	protein_coding	10000	16	7.18576
167921	4	149120000	149125000	NR3C2'	'ARHGAP10';'NR3C2';'RP11-76G10.1'	noncoding_antisense;protein_coding	167924	4	149135000	149140000		'ARHGAP10';'NR3C2'	protein_coding	15000	23	16.1954
167954	4	149285000	149290000	NR3C2'	'NR3C2'	protein_coding	167955	4	149290000	149295000	NR3C2'	'NR3C2'	protein_coding	5000	51	5.66227
167970	4	149365000	149370000	NR3C2'	'CATG00000070525.1';'NR3C2'	noncoding_lncRNA_divergent;protein_coding	167972	4	149375000	149380000		'CATG00000070525.1'	noncoding_lncRNA_divergent	10000	16	5.93621
168019	4	149610000	149615000	RP11-503L19.1'	'RP11-503L19.1'	noncoding_lncRNA_intergenic	168018	4	149605000	149610000				5000	149	34.6574
168093	4	149980000	149985000	RP11-563M4.1'	'RP11-563M4.1'	noncoding_lncRNA_lincRNA	168091	4	149970000	149975000		'RP11-563M4.1'	noncoding_lncRNA_lincRNA	10000	32	16.3666
168484	4	151935000	151940000	LRBA'	'CATG00000070585.1';'LRBA'	noncoding_lncRNA_divergent;protein_coding	168477	4	151900000	151905000		'LRBA'	protein_coding	35000	5	6.29046
168484	4	151935000	151940000	LRBA'	'CATG00000070585.1';'LRBA'	noncoding_lncRNA_divergent;protein_coding	168480	4	151915000	151920000		'CATG00000074151.1';'LRBA'	noncoding_lncRNA_noncoding_sense_intronic;protein_coding	20000	8	9.65497
168510	4	152065000	152070000	SH3D19'	'SH3D19'	protein_coding	168511	4	152070000	152075000		'SH3D19'	protein_coding	5000	45	5.16838
168537	4	152200000	152205000	RP11-731D1.3'	'CATG00000074157.1';'PRSS48';'RP11-731D1.3';'SH3D19'	noncoding_lncRNA_noncoding_sense_intronic;noncoding_pseudogene;protein_coding	168535	4	152190000	152195000		'CATG00000074157.1';'SH3D19'	noncoding_lncRNA_noncoding_sense_intronic;protein_coding	10000	14	5.42177
168546	4	152245000	152250000	SH3D19'	'RP11-731D1.4';'SH3D19'	noncoding_lncRNA_divergent;protein_coding	168544	4	152235000	152240000		'SH3D19'	protein_coding	10000	24	11.5961
168596	4	152495000	152500000	RN7SKP35'	'FAM160A1';'RN7SKP35'	noncoding_misc_RNA;protein_coding	168597	4	152500000	152505000		'FAM160A1'	protein_coding	5000	90	13.2313
168701	4	153020000	153025000	RP11-18H21.1'	'RP11-18H21.1'	noncoding_lncRNA_intergenic	168702	4	153025000	153030000		'RP11-18H21.1'	noncoding_lncRNA_intergenic	5000	143	36.7368
16876	1	84375000	84380000	TTLL7'	'TTLL7'	protein_coding	16871	1	84350000	84355000		'TTLL7'	protein_coding	25000	15	14.1497
168869	4	153860000	153865000	FHDC1'	'FHDC1'	protein_coding	168867	4	153850000	153855000				10000	14	5.60952
16890	1	84445000	84450000	TTLL7-IT1'	'TTLL7';'TTLL7-IT1'	noncoding_lncRNA_noncoding_sense_intronic;protein_coding	16888	1	84435000	84440000		'TTLL7';'TTLL7-IT1'	noncoding_lncRNA_noncoding_sense_intronic;protein_coding	10000	28	9.20561
16890	1	84445000	84450000	TTLL7-IT1'	'TTLL7';'TTLL7-IT1'	noncoding_lncRNA_noncoding_sense_intronic;protein_coding	16892	1	84455000	84460000		'TTLL7';'TTLL7-IT1'	noncoding_lncRNA_noncoding_sense_intronic;protein_coding	10000	25	9.07918
16893	1	84460000	84465000	TTLL7'	'CATG00000005899.1';'TTLL7'	noncoding_lncRNA_divergent;protein_coding	16892	1	84455000	84460000		'TTLL7';'TTLL7-IT1'	noncoding_lncRNA_noncoding_sense_intronic;protein_coding	5000	62	5.93651
168932	4	154175000	154180000	TRIM2'	'TRIM2'	protein_coding	168934	4	154185000	154190000	RNU6-1196P';Y_RNA'	'RNU6-1196P';'TRIM2';'Y_RNA'	noncoding_misc_RNA;noncoding_snRNA;protein_coding	10000	16	7.78425
168998	4	154505000	154510000	KIAA0922'	'KIAA0922'	protein_coding	169000	4	154515000	154520000		'KIAA0922'	protein_coding	10000	36	20.0699
16909	1	84540000	84545000	PRKACB';RP11-486G15.2'	'PRKACB';'RP11-486G15.2'	noncoding_lncRNA_divergent;protein_coding	16912	1	84555000	84560000		'PRKACB'	protein_coding	15000	12	8.03267
16922	1	84605000	84610000	PRKACB'	'CATG00000005909.1';'CATG00000064388.1';'PRKACB'	noncoding_lncRNA_divergent;noncoding_lncRNA_noncoding_sense_intronic;protein_coding	16923	1	84610000	84615000	PRKACB'	'CATG00000064388.1';'PRKACB'	noncoding_lncRNA_divergent;protein_coding	5000	63	7.42375
16922	1	84605000	84610000	PRKACB'	'CATG00000005909.1';'CATG00000064388.1';'PRKACB'	noncoding_lncRNA_divergent;noncoding_lncRNA_noncoding_sense_intronic;protein_coding	16928	1	84635000	84640000		'CATG00000064388.1';'PRKACB'	noncoding_lncRNA_divergent;protein_coding	30000	5	4.75861
16923	1	84610000	84615000	PRKACB'	'CATG00000064388.1';'PRKACB'	noncoding_lncRNA_divergent;protein_coding	16924	1	84615000	84620000		'CATG00000064388.1';'PRKACB'	noncoding_lncRNA_divergent;protein_coding	5000	66	7.91968
16923	1	84610000	84615000	PRKACB'	'CATG00000064388.1';'PRKACB'	noncoding_lncRNA_divergent;protein_coding	16925	1	84620000	84625000		'CATG00000064388.1';'PRKACB'	noncoding_lncRNA_divergent;protein_coding	10000	25	8.05015
16927	1	84630000	84635000	PRKACB'	'CATG00000064388.1';'PRKACB'	noncoding_lncRNA_divergent;protein_coding	16925	1	84620000	84625000		'CATG00000064388.1';'PRKACB'	noncoding_lncRNA_divergent;protein_coding	10000	58	27.4517
16927	1	84630000	84635000	PRKACB'	'CATG00000064388.1';'PRKACB'	noncoding_lncRNA_divergent;protein_coding	16928	1	84635000	84640000		'CATG00000064388.1';'PRKACB'	noncoding_lncRNA_divergent;protein_coding	5000	122	18.2382
16930	1	84645000	84650000	PRKACB'	'CATG00000064388.1';'PRKACB'	noncoding_lncRNA_divergent;protein_coding	16928	1	84635000	84640000		'CATG00000064388.1';'PRKACB'	noncoding_lncRNA_divergent;protein_coding	10000	52	24.3206
16930	1	84645000	84650000	PRKACB'	'CATG00000064388.1';'PRKACB'	noncoding_lncRNA_divergent;protein_coding	16931	1	84650000	84655000		'CATG00000064388.1';'PRKACB'	noncoding_lncRNA_divergent;protein_coding	5000	149	19.5671
16930	1	84645000	84650000	PRKACB'	'CATG00000064388.1';'PRKACB'	noncoding_lncRNA_divergent;protein_coding	16954	1	84765000	84770000	SAMD13'	'CATG00000064388.1';'SAMD13'	noncoding_lncRNA_divergent;protein_coding	120000	5	6.27833
169371	4	156370000	156375000	MTND5P9';MTND6P17';RP11-627H22.9'	'MTND5P9';'MTND6P17';'RP11-627H22.9';'RP13-487K5.1'	noncoding_lncRNA_intergenic;noncoding_pseudogene	169370	4	156365000	156370000		'RP13-487K5.1'	noncoding_lncRNA_intergenic	5000	94	16.5014
169373	4	156380000	156385000	MTATP6P9';MTND1P22';MTND2P33';RP11-627H22.5';RP11-627H22.6'	'MTND1P22';'MTND2P33';'RP11-627H22.5';'RP11-627H22.6';'RP13-487K5.1'	noncoding_lncRNA_intergenic;noncoding_pseudogene	169375	4	156390000	156395000		'RP13-487K5.1'	noncoding_lncRNA_intergenic	10000	21	9.95491
169414	4	156585000	156590000	GUCY1A3'	'CATG00000074256.1';'GUCY1A3'	noncoding_lncRNA_noncoding_antisense;protein_coding	169415	4	156590000	156595000		'CATG00000074256.1';'GUCY1A3'	noncoding_lncRNA_noncoding_antisense;protein_coding	5000	55	6.57005
16943	1	84710000	84715000	RP11-82H13.2'	'CATG00000064388.1';'PRKACB';'RP11-82H13.2'	noncoding_lncRNA_divergent;noncoding_pseudogene;protein_coding	16944	1	84715000	84720000		'CATG00000064388.1';'PRKACB'	noncoding_lncRNA_divergent;protein_coding	5000	114	13.7262
16953	1	84760000	84765000	SAMD13'	'CATG00000064388.1';'SAMD13'	noncoding_lncRNA_divergent;protein_coding	16954	1	84765000	84770000	SAMD13'	'CATG00000064388.1';'SAMD13'	noncoding_lncRNA_divergent;protein_coding	5000	52	5.40768
16959	1	84790000	84795000	SAMD13'	'SAMD13'	protein_coding	16957	1	84780000	84785000		'SAMD13'	protein_coding	10000	31	15.9785
1697	1	8480000	8485000	RERE';RP5-1115A15.1'	'RERE';'RP5-1115A15.1'	noncoding_lncRNA_divergent;protein_coding	1696	1	8475000	8480000		'RERE'	protein_coding	5000	126	23.7846
16973	1	84860000	84865000	DNASE2B';UOX'	'CATG00000064422.1';'UOX'	noncoding_pseudogene;uncertain_coding	16976	1	84875000	84880000		'CATG00000064422.1';'DNASE2B'	protein_coding;uncertain_coding	15000	16	9.35944
169913	4	159080000	159085000	FAM198B'	'FAM198B'	protein_coding	169914	4	159085000	159090000	FAM198B'	'FAM198B'	protein_coding	5000	84	11.6678
169936	4	159195000	159200000	RP11-597D13.7'	'RP11-597D13.7';'TMEM144'	noncoding_pseudogene;protein_coding	169940	4	159215000	159220000				20000	6	4.61327
16998	1	84985000	84990000	SPATA1'	'CTBS';'SPATA1'	noncoding_pseudogene;protein_coding	16999	1	84990000	84995000		'CTBS';'SPATA1'	noncoding_pseudogene;protein_coding	5000	82	10.2406
17002	1	85005000	85010000	SPATA1'	'CTBS';'SPATA1'	noncoding_pseudogene;protein_coding	17001	1	85000000	85005000		'CTBS';'SPATA1'	noncoding_pseudogene;protein_coding	5000	53	4.70719
17002	1	85005000	85010000	SPATA1'	'CTBS';'SPATA1'	noncoding_pseudogene;protein_coding	17003	1	85010000	85015000	SPATA1'	'CTBS';'SPATA1'	noncoding_pseudogene;protein_coding	5000	89	11.2409
170042	4	159725000	159730000	FNIP2'	'FNIP2'	protein_coding	170043	4	159730000	159735000		'FNIP2'	protein_coding	5000	54	7.82756
170106	4	160045000	160050000	AC095064.1';MIR3688-1'	'MIR3688-1';'RAPGEF2'	noncoding_miRNA;protein_coding	170110	4	160065000	160070000		'CATG00000070770.1';'RAPGEF2'	noncoding_lncRNA_noncoding_sense_intronic;protein_coding	20000	10	8.08199
17028	1	85135000	85140000	SSX2IP'	'SSX2IP'	protein_coding	17027	1	85130000	85135000		'SSX2IP'	protein_coding	5000	105	11.9579
17031	1	85150000	85155000	SSX2IP'	'SSX2IP'	protein_coding	17032	1	85155000	85160000	SSX2IP'	'CATG00000006010.1';'SSX2IP'	noncoding_lncRNA_divergent;protein_coding	5000	146	21.8188
17032	1	85155000	85160000	SSX2IP'	'CATG00000006010.1';'SSX2IP'	noncoding_lncRNA_divergent;protein_coding	17033	1	85160000	85165000		'CATG00000064495.1';'SSX2IP'	noncoding_lncRNA_intergenic;protein_coding	5000	120	19.915
17052	1	85255000	85260000	AC104169.1'	'AC104169.1'	noncoding_miRNA	17054	1	85265000	85270000		'LPAR3'	protein_coding	10000	23	10.4255
171	1	850000	855000	RP11-54O7.2';RP11-54O7.3'	'CATG00000046660.1';'RP11-54O7.1';'RP11-54O7.16';'RP11-54O7.2';'RP11-54O7.3'	noncoding_lncRNA_divergent;noncoding_lncRNA_intergenic;noncoding_lncRNA_lincRNA;noncoding_sense_overlap_RNA;uncertain_coding	173	1	860000	865000	SAMD11'	'AL645608.1';'RP11-54O7.3';'SAMD11'	noncoding_lncRNA_divergent;protein_coding	10000	18	8.34101
171120	4	165115000	165120000	ANP32C'	'ANP32C';'MARCH1'	noncoding_pseudogene;protein_coding	171121	4	165120000	165125000		'MARCH1'	protein_coding	5000	62	6.83733
17120	1	85595000	85600000	MIR4423'	'MIR4423';'WDR63'	noncoding_miRNA;protein_coding	17121	1	85600000	85605000	MIR4423'	'WDR63'	protein_coding	5000	80	12.1045
171238	4	165705000	165710000	RNU6-668P'	'RNU6-668P';'RP11-294O2.2'	noncoding_lncRNA_intergenic;noncoding_snRNA	171236	4	165695000	165700000		'CATG00000074435.1';'RP11-294O2.2'	noncoding_lncRNA_intergenic	10000	13	5.26036
171269	4	165860000	165865000	NACA3P';RP11-366M4.6'	'NACA3P';'RP11-366M4.6'	noncoding_pseudogene	171272	4	165875000	165880000	FAM218A'	'FAM218A';'RP11-366M4.8';'TRIM61'	noncoding_pseudogene;protein_coding	15000	9	6.18177
17145	1	85720000	85725000	C1orf52'	'C1orf52'	protein_coding	17146	1	85725000	85730000	C1orf52';Y_RNA'	'BCL10';'C1orf52';'Y_RNA'	noncoding_misc_RNA;protein_coding	5000	68	9.43813
17149	1	85740000	85745000	BCL10';RP11-131L23.1'	'BCL10';'RP11-131L23.1'	noncoding_lncRNA_divergent;protein_coding	17148	1	85735000	85740000		'BCL10'	protein_coding	5000	218	36.7368
17174	1	85865000	85870000	DDAH1'	'DDAH1';'RP11-131L23.1'	noncoding_lncRNA_divergent;protein_coding	17172	1	85855000	85860000		'DDAH1';'RP11-131L23.1'	noncoding_lncRNA_divergent;protein_coding	10000	73	36.7368
17174	1	85865000	85870000	DDAH1'	'DDAH1';'RP11-131L23.1'	noncoding_lncRNA_divergent;protein_coding	17175	1	85870000	85875000	DDAH1'	'DDAH1';'RP11-131L23.1'	noncoding_lncRNA_divergent;protein_coding	5000	125	22.2405
17181	1	85900000	85905000	Y_RNA'	'DDAH1';'RP11-131L23.1';'Y_RNA'	noncoding_lncRNA_divergent;noncoding_misc_RNA;protein_coding	17179	1	85890000	85895000		'DDAH1';'RP11-131L23.1'	noncoding_lncRNA_divergent;protein_coding	10000	46	18.1649
17186	1	85925000	85930000	DDAH1'	'DDAH1'	protein_coding	17187	1	85930000	85935000	DDAH1';RP11-131L23.2'	'DDAH1';'RP11-131L23.2'	noncoding_lncRNA_lincRNA;protein_coding	5000	90	11.639
171933	4	169180000	169185000	DDX60'	'DDX60'	protein_coding	171932	4	169175000	169180000		'DDX60'	protein_coding	5000	73	11.1663
171944	4	169235000	169240000	DDX60'	'DDX60'	protein_coding	171945	4	169240000	169245000	DDX60'	'CATG00000070909.1'	noncoding_lncRNA_divergent	5000	64	8.17658
171961	4	169320000	169325000	DDX60L'	'DDX60L'	protein_coding	171963	4	169330000	169335000		'DDX60L'	protein_coding	10000	27	12.6169
171975	4	169390000	169395000	SNORA51'	'DDX60L';'SNORA51'	noncoding_snoRNA;protein_coding	171977	4	169400000	169405000	DDX60L'	'DDX60L'	protein_coding	10000	21	7.86892
172000	4	169515000	169520000	BTF3L4P4'	'BTF3L4P4';'CATG00000070917.1';'PALLD'	noncoding_lncRNA_noncoding_sense_intronic;noncoding_pseudogene;protein_coding	171999	4	169510000	169515000		'CATG00000070917.1';'PALLD'	noncoding_lncRNA_noncoding_sense_intronic;protein_coding	5000	75	9.44769
172112	4	170075000	170080000	SH3RF1'	'CATG00000070933.1';'SH3RF1'	noncoding_lncRNA_noncoding_antisense;protein_coding	172113	4	170080000	170085000		'SH3RF1'	protein_coding	5000	88	15.833
17212	1	86055000	86060000	SNORD81'	'CYR61';'SNORD81'	noncoding_snoRNA;protein_coding	17213	1	86060000	86065000	RP11-290M5.2'	'RP11-290M5.2';'ZNHIT6'	noncoding_lncRNA_lincRNA;protein_coding	5000	147	19.7372
17213	1	86060000	86065000	RP11-290M5.2'	'RP11-290M5.2';'ZNHIT6'	noncoding_lncRNA_lincRNA;protein_coding	17214	1	86065000	86070000	RP11-290M5.2'	'RP11-290M5.2';'ZNHIT6'	noncoding_lncRNA_lincRNA;protein_coding	5000	149	22.6106
172205	4	170540000	170545000	CLCN3'	'CATG00000074496.1';'CLCN3'	noncoding_lncRNA_divergent;protein_coding	172204	4	170535000	170540000		'CLCN3'	protein_coding	5000	114	22.7197
172217	4	170600000	170605000	CLCN3'	'CLCN3'	protein_coding	172214	4	170585000	170590000		'CLCN3'	protein_coding	15000	12	8.22796
172298	4	171005000	171010000	AADAT'	'AADAT'	protein_coding	172297	4	171000000	171005000		'AADAT'	protein_coding	5000	109	19.3743
172915	4	174090000	174095000	GALNT7';RP11-10K16.1'	'GALNT7';'HMGB2';'RP11-10K16.1'	noncoding_lncRNA_divergent;protein_coding	172918	4	174105000	174110000		'GALNT7';'HMGB2'	protein_coding	15000	9	5.81068
172915	4	174090000	174095000	GALNT7';RP11-10K16.1'	'GALNT7';'HMGB2';'RP11-10K16.1'	noncoding_lncRNA_divergent;protein_coding	172919	4	174110000	174115000		'CATG00000071007.1';'GALNT7';'HMGB2'	noncoding_sense_overlap_RNA;protein_coding	20000	9	8.57194
172946	4	174245000	174250000	RP11-798M19.3'	'GALNT7';'HMGB2';'RP11-798M19.3'	noncoding_antisense;protein_coding	172947	4	174250000	174255000	HMGB2';RP11-798M19.3'	'GALNT7';'HMGB2';'RP11-798M19.3'	noncoding_antisense;protein_coding	5000	91	15.562
172947	4	174250000	174255000	HMGB2';RP11-798M19.3'	'GALNT7';'HMGB2';'RP11-798M19.3'	noncoding_antisense;protein_coding	172948	4	174255000	174260000	HMGB2'	'GALNT7';'HMGB2'	protein_coding	5000	94	14.5661
173137	4	175200000	175205000	CEP44';FBXO8'	'CEP44';'FBXO8'	protein_coding	173138	4	175205000	175210000	CEP44';FBXO8'	'CEP44';'FBXO8'	protein_coding	5000	47	5.14497
173140	4	175215000	175220000	CEP44'	'CATG00000071054.1';'CEP44'	noncoding_sense_overlap_RNA;protein_coding	173142	4	175225000	175230000	CEP44'	'CEP44'	protein_coding	10000	33	15.1238
173185	4	175440000	175445000	HPGD'	'CATG00000071063.1';'HPGD';'RP11-440I14.2'	noncoding_lncRNA_divergent;noncoding_lncRNA_intergenic;protein_coding	173184	4	175435000	175440000		'CATG00000071063.1';'CATG00000074571.1';'HPGD'	noncoding_lncRNA_divergent;noncoding_sense_overlap_RNA;protein_coding	5000	96	14.8177
1737	1	8680000	8685000	RERE'	'RERE'	protein_coding	1735	1	8670000	8675000		'RERE'	protein_coding	10000	24	9.35113
173546	4	177245000	177250000	SPCS3'	'SPCS3'	protein_coding	173544	4	177235000	177240000		'RP11-87F15.2'	noncoding_lncRNA_divergent	10000	31	12.9561
1737	1	8680000	8685000	RERE'	'RERE'	protein_coding	1738	1	8685000	8690000	RERE'	'RERE'	protein_coding	5000	69	8.52054
17371	1	86850000	86855000	ODF2L'	'ODF2L'	protein_coding	17373	1	86860000	86865000	ODF2L'	'CATG00000006517.1';'ODF2L'	noncoding_lncRNA_divergent;protein_coding	10000	28	13.3947
17379	1	86890000	86895000	CLCA2'	'CLCA2'	protein_coding	17380	1	86895000	86900000		'CLCA2'	protein_coding	5000	118	19.3463
1738	1	8685000	8690000	RERE'	'RERE'	protein_coding	1740	1	8695000	8700000		'RERE'	protein_coding	10000	25	11.1671
17451	1	87250000	87255000	RP4-612B15.2'	'CATG00000006701.1';'RP4-612B15.2'	noncoding_lncRNA_intergenic;noncoding_pseudogene	17452	1	87255000	87260000				5000	45	4.60602
17480	1	87395000	87400000	RP4-604K5.3'	'HS2ST1';'RP4-604K5.3'	noncoding_lncRNA_lincRNA;protein_coding	17479	1	87390000	87395000		'HS2ST1'	protein_coding	5000	75	8.90315
17481	1	87400000	87405000	RP4-604K5.3'	'CATG00000006734.1';'HS2ST1';'RP4-604K5.3'	noncoding_lncRNA_lincRNA;noncoding_sense_overlap_RNA;protein_coding	17482	1	87405000	87410000	RP4-604K5.2'	'HS2ST1';'RP4-604K5.2'	noncoding_antisense;protein_coding	5000	74	8.93253
17485	1	87420000	87425000	HS2ST1'	'HS2ST1'	protein_coding	17486	1	87425000	87430000		'CATG00000006736.1';'HS2ST1'	noncoding_sense_overlap_RNA;protein_coding	5000	150	27.9704
174965	4	184340000	184345000	RP11-692E14.1'	'RP11-692E14.1'	noncoding_pseudogene	174963	4	184330000	184335000		'CATG00000071303.1';'CATG00000074726.1'	noncoding_lncRNA_intergenic;protein_coding	10000	18	7.55284
174965	4	184340000	184345000	RP11-692E14.1'	'RP11-692E14.1'	noncoding_pseudogene	174968	4	184355000	184360000				15000	13	10.1411
175011	4	184570000	184575000	RNU6-479P'	'RNU6-479P';'RWDD4'	noncoding_snRNA;protein_coding	175013	4	184580000	184585000	RWDD4';TRAPPC11'	'RWDD4';'TRAPPC11'	protein_coding	10000	39	17.2808
175052	4	184775000	184780000	STOX2'	'STOX2';'TRAPPC11'	protein_coding	175053	4	184780000	184785000		'STOX2';'TRAPPC11'	protein_coding	5000	57	6.20816
175165	4	185340000	185345000	IRF2'	'IRF2'	protein_coding	175166	4	185345000	185350000		'IRF2'	protein_coding	5000	102	18.8006
175228	4	185655000	185660000	CENPU'	'CATG00000071350.1';'MLF1IP'	noncoding_lncRNA_divergent;protein_coding	175230	4	185665000	185670000		'ACSL1'	protein_coding	10000	41	24.7944
175232	4	185675000	185680000	ACSL1'	'ACSL1'	protein_coding	175230	4	185665000	185670000		'ACSL1'	protein_coding	10000	17	6.81762
175235	4	185690000	185695000	ACSL1'	'ACSL1';'CATG00000071352.1'	noncoding_lncRNA_divergent;protein_coding	175236	4	185695000	185700000	ACSL1'	'ACSL1';'CATG00000071352.1'	noncoding_lncRNA_divergent;protein_coding	5000	61	8.40807
175236	4	185695000	185700000	ACSL1'	'ACSL1';'CATG00000071352.1'	noncoding_lncRNA_divergent;protein_coding	175237	4	185700000	185705000		'ACSL1';'CATG00000071352.1'	noncoding_lncRNA_divergent;protein_coding	5000	78	15.0255
175243	4	185730000	185735000	ACSL1';RP11-701P16.2'	'ACSL1';'RP11-701P16.2'	protein_coding	175244	4	185735000	185740000	RP11-701P16.2'	'ACSL1';'RP11-701P16.2'	protein_coding	5000	109	20.8171
175252	4	185775000	185780000	RP11-701P16.5'	'CATG00000071356.1';'CATG00000074758.1';'CATG00000074760.1';'RP11-701P16.5'	noncoding_lncRNA_intergenic;noncoding_lncRNA_noncoding_sense_intronic	175250	4	185765000	185770000		'CATG00000071354.1';'CATG00000074758.1';'RP11-701P16.5'	noncoding_lncRNA_divergent;noncoding_lncRNA_intergenic;noncoding_lncRNA_noncoding_sense_intronic	10000	13	4.98123
175309	4	186060000	186065000	SLC25A4'	'SLC25A4'	protein_coding	175310	4	186065000	186070000	SLC25A4'	'CATG00000074768.1';'KIAA1430';'SLC25A4'	noncoding_lncRNA_noncoding_antisense;protein_coding	5000	45	5.26341
175340	4	186215000	186220000	SNX25'	'SNX25'	protein_coding	175338	4	186205000	186210000		'SNX25'	protein_coding	10000	19	7.39577
175360	4	186315000	186320000	ANKRD37';LRP2BP'	'ANKRD37';'LRP2BP';'RP11-714G18.1'	noncoding_lncRNA_noncoding_antisense;protein_coding	175361	4	186320000	186325000		'ANKRD37';'UFSP2'	protein_coding	5000	206	36.7368
175364	4	186335000	186340000	UFSP2';Y_RNA'	'UFSP2';'Y_RNA'	noncoding_misc_RNA;protein_coding	175366	4	186345000	186350000	C4orf47';UFSP2'	'C4orf47';'UFSP2'	protein_coding	10000	35	19.153
175509	4	187060000	187065000	FAM149A'	'CATG00000074789.1';'FAM149A'	noncoding_lncRNA_divergent;protein_coding	175510	4	187065000	187070000	FAM149A'	'CATG00000074790.1';'FAM149A'	noncoding_lncRNA_divergent;protein_coding	5000	75	11.1781
175521	4	187120000	187125000	CYP4V2'	'CYP4V2';'KLKB1'	protein_coding	175522	4	187125000	187130000	CYP4V2';KLKB1'	'CYP4V2';'KLKB1'	protein_coding	5000	81	9.68235
17559	1	87790000	87795000	LMO4'	'CATG00000065093.1';'LMO4'	noncoding_lncRNA_divergent;protein_coding	17560	1	87795000	87800000	LMO4'	'LMO4'	protein_coding	5000	64	8.08731
17560	1	87795000	87800000	LMO4'	'LMO4'	protein_coding	17561	1	87800000	87805000		'LMO4'	protein_coding	5000	88	11.9808
175800	4	188515000	188520000	RP11-565A3.2'	'RP11-565A3.2'	noncoding_lncRNA_intergenic	175798	4	188505000	188510000		'RP11-565A3.2'	noncoding_lncRNA_intergenic	10000	17	6.75164
175910	4	189065000	189070000	RP11-366H4.3';TRIML1'	'TRIML1'	protein_coding	175912	4	189075000	189080000				10000	31	15.2692
176212	4	190575000	190580000	RP11-462G22.1'	'CATG00000074890.1';'CATG00000074891.1';'RP11-462G22.1'	noncoding_lncRNA_intergenic	176211	4	190570000	190575000		'CATG00000074890.1'	noncoding_lncRNA_intergenic	5000	95	10.0544
176213	4	190580000	190585000	RP11-462G22.1'	'CATG00000074891.1';'RP11-462G22.1'	noncoding_lncRNA_intergenic	176211	4	190570000	190575000		'CATG00000074890.1'	noncoding_lncRNA_intergenic	10000	27	6.91737
176213	4	190580000	190585000	RP11-462G22.1'	'CATG00000074891.1';'RP11-462G22.1'	noncoding_lncRNA_intergenic	176219	4	190610000	190615000		'RP11-462G22.2'	noncoding_lncRNA_intergenic	30000	8	7.14745
176221	4	190620000	190625000	RP11-462G22.2'	'RP11-462G22.2'	noncoding_lncRNA_intergenic	176214	4	190585000	190590000		'RP11-462G22.1'	noncoding_lncRNA_intergenic	35000	15	16.8664
176221	4	190620000	190625000	RP11-462G22.2'	'RP11-462G22.2'	noncoding_lncRNA_intergenic	176215	4	190590000	190595000				30000	10	8.94667
176221	4	190620000	190625000	RP11-462G22.2'	'RP11-462G22.2'	noncoding_lncRNA_intergenic	176220	4	190615000	190620000		'RP11-462G22.2'	noncoding_lncRNA_intergenic	5000	82	7.34866
176221	4	190620000	190625000	RP11-462G22.2'	'RP11-462G22.2'	noncoding_lncRNA_intergenic	176223	4	190630000	190635000	RNU1-51P'	'RNU1-51P';'RP11-462G22.2'	noncoding_lncRNA_intergenic;noncoding_small_RNA	10000	53	23.5318
176221	4	190620000	190625000	RP11-462G22.2'	'RP11-462G22.2'	noncoding_lncRNA_intergenic	176224	4	190635000	190640000		'RP11-462G22.2'	noncoding_lncRNA_intergenic	15000	15	6.16993
176268	4	190855000	190860000	AF146191.4'	'AF146191.4'	noncoding_lncRNA_divergent	176269	4	190860000	190865000	AF146191.4';FRG1'	'AF146191.4';'FRG1'	noncoding_lncRNA_divergent;protein_coding	5000	68	6.22046
176374	5	230000	235000	SDHA'	'SDHA'	protein_coding	176369	5	205000	210000		'CCDC127'	protein_coding	25000	6	5.43437
176382	5	270000	275000	CTD-2083E4.6';PDCD6'	'AHRR';'CTD-2083E4.6';'PDCD6'	noncoding_lncRNA_divergent;protein_coding	176655	5	1635000	1640000				1365000	7	10.9254
176434	5	530000	535000	MIR4456'			176438	5	550000	555000		'CATG00000078971.1'	noncoding_lncRNA_intergenic	20000	7	5.55773
176457	5	645000	650000	CEP72'	'CEP72'	protein_coding	176459	5	655000	660000	CEP72'	'CEP72';'TPPP'	protein_coding	10000	24	11.8271
176459	5	655000	660000	CEP72'	'CEP72';'TPPP'	protein_coding	176461	5	665000	670000	AC026740.1'	'AC026740.1';'CEP72';'TPPP'	protein_coding	10000	20	7.88717
176466	5	690000	695000	TPPP'	'CATG00000074934.1';'TPPP'	protein_coding;uncertain_coding	176485	5	785000	790000		'BRD9';'CATG00000074934.1';'CATG00000074937.1';'ZDHHC11'	noncoding_lncRNA_noncoding_antisense;protein_coding;uncertain_coding	95000	5	10.8264
176503	5	875000	880000	BRD9'	'BRD9'	protein_coding	176505	5	885000	890000	BRD9'	'BRD9'	protein_coding	10000	17	7.0072
176601	5	1365000	1370000	RP11-325I22.1';RP11-325I22.2'	'RP11-325I22.2'	noncoding_lncRNA_intergenic	176600	5	1360000	1365000		'RP11-325I22.2'	noncoding_lncRNA_intergenic	5000	71	11.8408
176632	5	1520000	1525000	LPCAT1'	'CATG00000074974.1';'LPCAT1'	protein_coding	176628	5	1500000	1505000		'LPCAT1'	protein_coding	20000	13	12.7392
1774	1	8865000	8870000	RP4-633I8.4'	'RERE';'RP4-633I8.4'	noncoding_lncRNA_lincRNA;protein_coding	1776	1	8875000	8880000	RERE'	'CATG00000008381.1';'RERE'	noncoding_lncRNA_divergent;protein_coding	10000	27	10.5609
17756	1	88775000	88780000	CTA-21C21.1'	'CATG00000065494.1';'CTA-21C21.1'	noncoding_lncRNA_intergenic;noncoding_pseudogene	17759	1	88790000	88795000				15000	12	4.63103
1776	1	8875000	8880000	RERE'	'CATG00000008381.1';'RERE'	noncoding_lncRNA_divergent;protein_coding	1777	1	8880000	8885000		'RERE'	protein_coding	5000	79	9.71861
177649	5	6605000	6610000	NSUN2'	'NSUN2'	protein_coding	177647	5	6595000	6600000		'NSUN2'	protein_coding	10000	26	10.7511
177654	5	6630000	6635000	NSUN2';SRD5A1'	'NSUN2';'SRD5A1'	protein_coding	177656	5	6640000	6645000		'SRD5A1'	protein_coding	10000	31	15.2637
177858	5	7650000	7655000	ADCY2'	'ADCY2'	protein_coding	177859	5	7655000	7660000	ADCY2'	'ADCY2'	protein_coding	5000	54	5.74735
177859	5	7655000	7660000	ADCY2'	'ADCY2'	protein_coding	177860	5	7660000	7665000		'ADCY2'	protein_coding	5000	107	15.9171
177865	5	7685000	7690000	ADCY2'	'ADCY2'	protein_coding	177860	5	7660000	7665000		'ADCY2'	protein_coding	25000	6	4.71902
177897	5	7845000	7850000	C5orf49'	'C5orf49'	protein_coding	177898	5	7850000	7855000	C5orf49';MTRR'	'C5orf49';'MTRR'	protein_coding	5000	58	5.98962
177903	5	7875000	7880000	MTRR'	'MTRR'	protein_coding	177904	5	7880000	7885000	MTRR'	'MTRR'	protein_coding	5000	138	25.166
177959	5	8155000	8160000	RP11-215I16.1'	'RP11-215I16.1'	noncoding_pseudogene	193319	5	84955000	84960000	CTC-480C2.1'			76800000	5	6.92404
178016	5	8440000	8445000	RP11-480D4.6'	'RP11-480D4.1';'RP11-480D4.2'	noncoding_lncRNA_intergenic;noncoding_lncRNA_noncoding_sense_intronic	178019	5	8455000	8460000	MIR4458HG';RP11-480D4.1';RP11-480D4.2';RP11-480D4.4'	'MIR4458HG';'RP11-480D4.1';'RP11-480D4.2';'RP11-480D4.4'	noncoding_lncRNA_divergent;noncoding_lncRNA_intergenic;noncoding_lncRNA_noncoding_sense_intronic;noncoding_pseudogene	15000	14	6.64208
178017	5	8445000	8450000	MIR4458HG';RP11-480D4.6'	'RP11-480D4.1';'RP11-480D4.2';'RP11-480D4.4';'RP11-480D4.6'	noncoding_lncRNA_intergenic;noncoding_lncRNA_lincRNA;noncoding_lncRNA_noncoding_sense_intronic;noncoding_pseudogene	178019	5	8455000	8460000	MIR4458HG';RP11-480D4.1';RP11-480D4.2';RP11-480D4.4'	'MIR4458HG';'RP11-480D4.1';'RP11-480D4.2';'RP11-480D4.4'	noncoding_lncRNA_divergent;noncoding_lncRNA_intergenic;noncoding_lncRNA_noncoding_sense_intronic;noncoding_pseudogene	10000	22	6.54717
178138	5	9050000	9055000	MIR4636'	'MIR4636';'SEMA5A'	noncoding_miRNA;protein_coding	178139	5	9055000	9060000		'SEMA5A'	protein_coding	5000	74	9.29746
17830	1	89145000	89150000	PKN2';RP11-76N22.2'	'PKN2';'RP11-76N22.2'	noncoding_lncRNA_divergent;protein_coding	17831	1	89150000	89155000	PKN2';RP11-76N22.2'	'PKN2';'RP11-76N22.2'	noncoding_lncRNA_divergent;protein_coding	5000	136	28.9325
17831	1	89150000	89155000	PKN2';RP11-76N22.2'	'PKN2';'RP11-76N22.2'	noncoding_lncRNA_divergent;protein_coding	17835	1	89170000	89175000		'PKN2'	protein_coding	20000	10	8.3435
178423	5	10475000	10480000	RP11-1C1.7'	'ROPN1L';'RP11-1C1.7'	noncoding_antisense;protein_coding	178421	5	10465000	10470000		'ROPN1L'	protein_coding	10000	34	16.8004
178426	5	10490000	10495000	RP11-1C1.6'	'RP11-1C1.4';'RP11-1C1.6'	noncoding_lncRNA_intergenic;noncoding_lncRNA_lincRNA	178421	5	10465000	10470000		'ROPN1L'	protein_coding	25000	10	9.23111
178436	5	10540000	10545000	AC112200.1'	'AC112200.1'	noncoding_pseudogene	178439	5	10555000	10560000				15000	9	6.46977
178480	5	10760000	10765000	CTD-2154B17.4';DAP'	'CTD-2154B17.4';'DAP'	noncoding_lncRNA_divergent;protein_coding	178482	5	10770000	10775000		'CATG00000079131.1';'CTD-2154B17.4'	noncoding_lncRNA_divergent;noncoding_lncRNA_intergenic	10000	27	11.8272
17878	1	89385000	89390000	RP11-82K18.2'	'CCBL2';'RP11-82K18.2'	noncoding_pseudogene;protein_coding	17877	1	89380000	89385000				5000	117	16.6706
17891	1	89450000	89455000	CCBL2'	'CCBL2';'RBMXL1'	protein_coding	17890	1	89445000	89450000		'CCBL2';'RBMXL1'	protein_coding	5000	244	36.7368
17891	1	89450000	89455000	CCBL2'	'CCBL2';'RBMXL1'	protein_coding	17892	1	89455000	89460000	CCBL2';RBMXL1'	'CATG00000007167.1';'CCBL2';'RBMXL1'	noncoding_lncRNA_divergent;protein_coding	5000	94	13.8272
17892	1	89455000	89460000	CCBL2';RBMXL1'	'CATG00000007167.1';'CCBL2';'RBMXL1'	noncoding_lncRNA_divergent;protein_coding	17893	1	89460000	89465000		'CATG00000007167.1';'CCBL2'	noncoding_lncRNA_divergent;protein_coding	5000	68	7.83021
17898	1	89485000	89490000	GBP3';Y_RNA'	'CATG00000007179.1';'CCBL2';'GBP1';'GBP3';'Y_RNA'	noncoding_lncRNA_divergent;noncoding_misc_RNA;protein_coding	17895	1	89470000	89475000		'CCBL2';'GBP1';'GBP3'	protein_coding	15000	23	14.7109
17904	1	89515000	89520000	GBP1'	'CATG00000007179.1';'CCBL2';'GBP1';'GBP2';'GBP3'	noncoding_lncRNA_divergent;protein_coding	17895	1	89470000	89475000		'CCBL2';'GBP1';'GBP3'	protein_coding	45000	8	9.68674
1791	1	8950000	8955000	HMGN2P17'	'HMGN2P17'	noncoding_pseudogene	1790	1	8945000	8950000		'ENO1-AS1'	noncoding_lncRNA_divergent	5000	76	11.6245
17904	1	89515000	89520000	GBP1'	'CATG00000007179.1';'CCBL2';'GBP1';'GBP2';'GBP3'	noncoding_lncRNA_divergent;protein_coding	17903	1	89510000	89515000		'CATG00000007179.1';'CCBL2';'GBP1';'GBP3'	noncoding_lncRNA_divergent;protein_coding	5000	200	33.441
17904	1	89515000	89520000	GBP1'	'CATG00000007179.1';'CCBL2';'GBP1';'GBP2';'GBP3'	noncoding_lncRNA_divergent;protein_coding	17905	1	89520000	89525000	GBP1'	'CATG00000007179.1';'CCBL2';'GBP1';'GBP2';'GBP3'	noncoding_lncRNA_divergent;protein_coding	5000	87	11.5738
1791	1	8950000	8955000	HMGN2P17'	'HMGN2P17'	noncoding_pseudogene	1792	1	8955000	8960000				5000	62	7.90651
179114	5	13930000	13935000	DNAH5'	'DNAH5'	protein_coding	179115	5	13935000	13940000		'DNAH5'	protein_coding	5000	79	9.14931
179116	5	13940000	13945000	DNAH5'	'DNAH5'	protein_coding	179115	5	13935000	13940000		'DNAH5'	protein_coding	5000	102	16.4481
1794	1	8965000	8970000	RP3-477M7.5';RP3-477M7.6'	'RP3-477M7.5';'RP3-477M7.6'	noncoding_pseudogene	1792	1	8955000	8960000				10000	27	13.5184
179212	5	14420000	14425000	TRIO'	'CATG00000075192.1';'TRIO'	noncoding_lncRNA_noncoding_sense_intronic;protein_coding	179214	5	14430000	14435000		'TRIO'	protein_coding	10000	22	9.07375
179244	5	14580000	14585000	FAM105A'	'CATG00000075197.1';'FAM105A'	noncoding_lncRNA_intergenic;protein_coding	179242	5	14570000	14575000		'CATG00000079211.1'	noncoding_lncRNA_intergenic	10000	14	5.17144
179258	5	14650000	14655000	EEF1A1P13'	'CTD-2165H16.4';'EEF1A1P13'	noncoding_lncRNA_divergent;noncoding_pseudogene	179260	5	14660000	14665000	CTD-2165H16.4';FAM105B'	'CTD-2165H16.4';'FAM105B'	noncoding_lncRNA_divergent;protein_coding	10000	28	12.984
179260	5	14660000	14665000	CTD-2165H16.4';FAM105B'	'CTD-2165H16.4';'FAM105B'	noncoding_lncRNA_divergent;protein_coding	179261	5	14665000	14670000	CTD-2165H16.4';FAM105B'	'FAM105B'	protein_coding	5000	71	11.937
17929	1	89640000	89645000	GBP7'	'CATG00000007185.1';'GBP1';'GBP4';'GBP7'	noncoding_lncRNA_divergent;protein_coding	17928	1	89635000	89640000		'CATG00000007185.1';'GBP1';'GBP4';'GBP7'	noncoding_lncRNA_divergent;protein_coding	5000	57	5.14778
179287	5	14795000	14800000	RBBP4P1'	'ANKH';'RBBP4P1'	noncoding_pseudogene;protein_coding	179286	5	14790000	14795000		'ANKH';'RBBP4P1'	noncoding_pseudogene;protein_coding	5000	181	30.7503
179301	5	14865000	14870000	ANKH'	'ANKH'	protein_coding	179299	5	14855000	14860000		'ANKH'	protein_coding	10000	16	5.64205
17934	1	89665000	89670000	GBP4'	'CATG00000007222.1';'GBP1';'GBP5'	noncoding_lncRNA_divergent;protein_coding	17942	1	89705000	89710000		'GBP1';'GBP5'	protein_coding	40000	8	7.71263
17946	1	89725000	89730000	GBP5';RP4-620F22.2'	'GBP1';'GBP5';'RP4-620F22.2'	noncoding_antisense;protein_coding	17945	1	89720000	89725000		'GBP1';'GBP5'	protein_coding	5000	189	33.8464
17946	1	89725000	89730000	GBP5';RP4-620F22.2'	'GBP1';'GBP5';'RP4-620F22.2'	noncoding_antisense;protein_coding	17947	1	89730000	89735000	GBP5'	'GBP1';'GBP5';'RP4-620F22.2'	noncoding_antisense;protein_coding	5000	64	6.05373
17947	1	89730000	89735000	GBP5'	'GBP1';'GBP5';'RP4-620F22.2'	noncoding_antisense;protein_coding	17948	1	89735000	89740000	GBP5'	'CATG00000007290.1';'GBP1';'GBP5';'RP4-620F22.2'	noncoding_antisense;noncoding_lncRNA_divergent;protein_coding	5000	103	12.1914
17948	1	89735000	89740000	GBP5'	'CATG00000007290.1';'GBP1';'GBP5';'RP4-620F22.2'	noncoding_antisense;noncoding_lncRNA_divergent;protein_coding	17949	1	89740000	89745000		'CATG00000007296.1';'GBP5'	noncoding_lncRNA_divergent;protein_coding	5000	161	23.7538
179620	5	16460000	16465000	ZNF622'	'ZNF622'	protein_coding	179619	5	16455000	16460000		'ZNF622'	protein_coding	5000	61	6.79276
179620	5	16460000	16465000	ZNF622'	'ZNF622'	protein_coding	179621	5	16465000	16470000	ZNF622'	'CATG00000075226.1';'ZNF622'	noncoding_lncRNA_divergent;protein_coding	5000	140	29.7736
179629	5	16505000	16510000	FAM134B'	'FAM134B'	protein_coding	179626	5	16490000	16495000		'FAM134B'	protein_coding	15000	16	11.9309
179629	5	16505000	16510000	FAM134B'	'FAM134B'	protein_coding	179632	5	16520000	16525000		'FAM134B'	protein_coding	15000	17	12.4338
17967	1	89830000	89835000	GBP6'	'GBP6'	protein_coding	17965	1	89820000	89825000				10000	55	28.8303
179711	5	16915000	16920000	MYO10'	'MYO10'	protein_coding	179712	5	16920000	16925000		'MYO10'	protein_coding	5000	54	6.86423
179741	5	17065000	17070000	BASP1'	'CATG00000075239.1'	noncoding_lncRNA_intergenic	179739	5	17055000	17060000				10000	25	11.0307
179751	5	17115000	17120000	Y_RNA'	'AC091878.1';'CATG00000075239.1';'Y_RNA'	noncoding_lncRNA_intergenic	179753	5	17125000	17130000		'AC091878.1';'CATG00000075239.1'	noncoding_lncRNA_intergenic	10000	33	17.1498
179789	5	17305000	17310000	CTD-2139B15.1'	'CTD-2139B15.1'	noncoding_pseudogene	179793	5	17325000	17330000				20000	8	4.83496
179831	5	17515000	17520000	RP11-321E2.2'	'RP11-321E2.2'	noncoding_pseudogene	179833	5	17525000	17530000	RP11-321E2.8';RP11-321E2.9'	'RP11-321E2.8';'RP11-321E2.9'	noncoding_pseudogene	10000	13	4.61324
180105	5	18885000	18890000	UBE2V1P12'	'RP11-124N3.3';'UBE2V1P12'	noncoding_lncRNA_intergenic;noncoding_pseudogene	180104	5	18880000	18885000		'RP11-124N3.3'	noncoding_lncRNA_intergenic	5000	90	10.9793
18058	1	90285000	90290000	LRRC8D';RP5-943J3.2'	'LRRC8D';'RP11-302M6.4';'RP5-943J3.2'	noncoding_lncRNA_divergent;protein_coding	18060	1	90295000	90300000	LRRC8D'	'LRRC8D';'RP11-302M6.4'	protein_coding	10000	17	5.72496
180626	5	21490000	21495000	AC138951.1'	'AC138951.1';'GUSBP1'	noncoding_pseudogene	183164	5	34180000	34185000	RP11-1023L17.1'	'RP11-1023L17.1'	noncoding_pseudogene	12690000	10	14.4847
180651	5	21615000	21620000	RP11-804N13.1'	'RP11-804N13.1'	noncoding_lncRNA_intergenic	180652	5	21620000	21625000		'RP11-804N13.1'	noncoding_lncRNA_intergenic	5000	114	21.0685
180770	5	22210000	22215000	CDH12'	'CDH12'	protein_coding	190475	5	70735000	70740000		'RP11-136K7.2'	noncoding_lncRNA_intergenic	48525000	6	8.4591
180770	5	22210000	22215000	CDH12'	'CDH12'	protein_coding	190476	5	70740000	70745000	RP11-136K7.1';RP11-136K7.2'	'RP11-136K7.1';'RP11-136K7.2'	noncoding_lncRNA_intergenic;noncoding_lncRNA_lincRNA	48530000	75	36.7368
18093	1	90460000	90465000	GEMIN8P4';ZNF326'	'GEMIN8P4';'ZNF326'	noncoding_pseudogene;protein_coding	18094	1	90465000	90470000		'ZNF326'	protein_coding	5000	57	5.78421
181123	5	23975000	23980000	CTD-2138O14.1'	'C5orf17'	protein_coding	181126	5	23990000	23995000	Y_RNA'	'C5orf17';'Y_RNA'	noncoding_misc_RNA;protein_coding	15000	15	9.24464
181124	5	23980000	23985000	CTD-2138O14.1'	'C5orf17';'CTD-2138O14.1'	noncoding_pseudogene;protein_coding	181126	5	23990000	23995000	Y_RNA'	'C5orf17';'Y_RNA'	noncoding_misc_RNA;protein_coding	10000	28	11.8493
181126	5	23990000	23995000	Y_RNA'	'C5orf17';'Y_RNA'	noncoding_misc_RNA;protein_coding	181127	5	23995000	24000000	Y_RNA'	'C5orf17'	protein_coding	5000	52	5.1668
181416	5	25440000	25445000	CTD-2306M5.1'	'CTD-2306M5.1'	noncoding_lncRNA_lincRNA	181417	5	25445000	25450000	CTD-2306M5.1'	'CTD-2306M5.1'	noncoding_lncRNA_lincRNA	5000	71	9.6027
181607	5	26395000	26400000	RP11-351N6.1'	'RP11-351N6.1'	noncoding_lncRNA_lincRNA	181605	5	26385000	26390000		'RP11-351N6.1'	noncoding_lncRNA_lincRNA	10000	31	12.5524
181735	5	27035000	27040000	CDH9'	'CDH9'	protein_coding	181731	5	27015000	27020000		'CDH9'	protein_coding	20000	16	15.1527
181822	5	27470000	27475000	LINC01021'	'LINC01021'	noncoding_lncRNA_intergenic	181821	5	27465000	27470000		'LINC01021'	noncoding_lncRNA_intergenic	5000	69	8.36786
182297	5	29845000	29850000	CTD-2057J6.2'	'CTD-2057J6.2'	noncoding_pseudogene	182298	5	29850000	29855000				5000	61	5.49565
182377	5	30245000	30250000	RP11-136H13.1'	'RP11-136H13.1'	noncoding_pseudogene	182376	5	30240000	30245000				5000	62	5.97502
1826	1	9125000	9130000	SLC2A5'	'SLC2A5'	protein_coding	1827	1	9130000	9135000	SLC2A5'	'SLC2A5'	protein_coding	5000	79	14.3403
182703	5	31875000	31880000	AC025458.1'	'PDZD2'	protein_coding	182707	5	31895000	31900000		'PDZD2'	protein_coding	20000	9	6.41392
182748	5	32100000	32105000	PDZD2'	'CTD-2152M20.2';'GOLPH3';'PDZD2'	noncoding_antisense;protein_coding	182751	5	32115000	32120000		'CTD-2152M20.2';'GOLPH3'	noncoding_antisense;protein_coding	15000	12	6.05035
18277	1	91380000	91385000	ZNF644'	'ZNF644'	protein_coding	18278	1	91385000	91390000		'ZNF644'	protein_coding	5000	96	14.5254
182778	5	32250000	32255000	MTMR12'	'MTMR12'	protein_coding	182779	5	32255000	32260000	MTMR12'	'MTMR12'	protein_coding	5000	74	14.0847
182789	5	32305000	32310000	RNU6-378P'	'MTMR12';'RNU6-378P'	noncoding_snRNA;protein_coding	182790	5	32310000	32315000	MTMR12';RNU6-378P'	'CATG00000075497.1';'MTMR12'	noncoding_lncRNA_divergent;protein_coding	5000	265	36.7368
182800	5	32360000	32365000	ZFR'	'ZFR'	protein_coding	182802	5	32370000	32375000		'CATG00000079430.1';'ZFR'	noncoding_lncRNA_noncoding_sense_intronic;protein_coding	10000	47	22.7045
182803	5	32375000	32380000	AC008949.1';ZFR'	'AC008949.1';'CATG00000079430.1';'ZFR'	noncoding_lncRNA_noncoding_sense_intronic;noncoding_small_RNA;protein_coding	182802	5	32370000	32375000		'CATG00000079430.1';'ZFR'	noncoding_lncRNA_noncoding_sense_intronic;protein_coding	5000	76	9.49135
18281	1	91400000	91405000	ZNF644'	'ZNF644'	protein_coding	18283	1	91410000	91415000		'ZNF644'	protein_coding	10000	50	26.5921
182885	5	32785000	32790000	AC026703.1'	'AC026703.1';'NPR3'	protein_coding	182886	5	32790000	32795000		'AC026703.1';'NPR3'	protein_coding	5000	127	19.7415
182918	5	32950000	32955000	CTD-2218G20.2'	'CTD-2066L21.3';'CTD-2218G20.2';'NPR3'	noncoding_lncRNA_intergenic;noncoding_lncRNA_lincRNA;protein_coding	182920	5	32960000	32965000		'CTD-2066L21.3';'CTD-2218G20.2';'NPR3'	noncoding_lncRNA_intergenic;noncoding_lncRNA_lincRNA;protein_coding	10000	21	8.46806
182929	5	33005000	33010000	CTD-2066L21.1'	'CTD-2066L21.1';'CTD-2066L21.3'	noncoding_lncRNA_intergenic;noncoding_lncRNA_lincRNA	182930	5	33010000	33015000	CTD-2066L21.1'	'CTD-2066L21.1';'CTD-2066L21.2';'CTD-2066L21.3'	noncoding_lncRNA_intergenic;noncoding_lncRNA_lincRNA	5000	87	11.9197
18298	1	91485000	91490000	RPL5P6';ZNF644'	'CATG00000007755.1';'RPL5P6';'ZNF644'	noncoding_lncRNA_divergent;noncoding_pseudogene;protein_coding	18294	1	91465000	91470000		'ZNF644'	protein_coding	20000	10	6.60598
18298	1	91485000	91490000	RPL5P6';ZNF644'	'CATG00000007755.1';'RPL5P6';'ZNF644'	noncoding_lncRNA_divergent;noncoding_pseudogene;protein_coding	18297	1	91480000	91485000		'ZNF644'	protein_coding	5000	57	8.15411
182973	5	33225000	33230000	RP11-113I22.1'	'CTD-2066L21.3';'RP11-113I22.1'	noncoding_lncRNA_intergenic	182974	5	33230000	33235000	RP11-113I22.1'	'CTD-2066L21.3';'RP11-113I22.1'	noncoding_lncRNA_intergenic	5000	73	10.9589
182974	5	33230000	33235000	RP11-113I22.1'	'CTD-2066L21.3';'RP11-113I22.1'	noncoding_lncRNA_intergenic	182975	5	33235000	33240000		'CTD-2066L21.3';'RP11-113I22.1'	noncoding_lncRNA_intergenic	5000	63	8.01327
183015	5	33435000	33440000	CTD-2203K17.1';TARS'	'CTD-2203K17.1'	noncoding_lncRNA_divergent	183016	5	33440000	33445000	CTD-2203K17.1';TARS'	'CATG00000075510.1';'CTD-2203K17.1';'TARS'	noncoding_lncRNA_divergent;noncoding_lncRNA_noncoding_sense_intronic;protein_coding	5000	38	4.70343
183125	5	33985000	33990000	SLC45A2'	'AMACR';'RP11-1084J3.4'	protein_coding	183123	5	33975000	33980000		'RP11-1084J3.1';'SLC45A2'	noncoding_pseudogene;protein_coding	10000	25	9.35424
183125	5	33985000	33990000	SLC45A2'	'AMACR';'RP11-1084J3.4'	protein_coding	183126	5	33990000	33995000		'AMACR';'RP11-1084J3.4'	protein_coding	5000	95	13.3069
183127	5	33995000	34000000	RP11-1084J3.3'	'AMACR';'RP11-1084J3.3';'RP11-1084J3.4'	noncoding_pseudogene;protein_coding	183126	5	33990000	33995000		'AMACR';'RP11-1084J3.4'	protein_coding	5000	99	15.7655
183129	5	34005000	34010000	AMACR'	'AMACR';'RP11-1084J3.4'	protein_coding	183128	5	34000000	34005000		'AMACR';'RP11-1084J3.4'	protein_coding	5000	58	7.87862
183133	5	34025000	34030000	C1QTNF3'	'AMACR';'C1QTNF3';'RP11-1084J3.4'	protein_coding	183135	5	34035000	34040000		'C1QTNF3';'RP11-1084J3.4'	protein_coding	10000	37	18.6906
183296	5	34840000	34845000	CTD-2517O10.6';TTC23L'	'RAD1';'TTC23L'	protein_coding	183297	5	34845000	34850000		'RAD1';'TTC23L'	protein_coding	5000	49	5.53318
183313	5	34925000	34930000	DNAJC21'	'BRIX1';'CATG00000079491.1';'DNAJC21';'RAD1'	noncoding_lncRNA_divergent;protein_coding	183312	5	34920000	34925000		'BRIX1';'CATG00000079491.1';'RAD1'	noncoding_lncRNA_divergent;protein_coding	5000	138	25.7275
183373	5	35225000	35230000	PRLR'	'CATG00000075560.1';'PRLR'	noncoding_lncRNA_divergent;protein_coding	183375	5	35235000	35240000		'PRLR'	protein_coding	10000	28	11.6069
183462	5	35670000	35675000	SPEF2'	'SPEF2'	protein_coding	183464	5	35680000	35685000		'CATG00000079506.1';'CTD-2113L7.1';'SPEF2'	noncoding_antisense;noncoding_lncRNA_noncoding_antisense;protein_coding	10000	31	10.6974
183493	5	35825000	35830000	CTD-2113L7.1'	'CATG00000079506.1';'CTD-2113L7.1'	noncoding_antisense;noncoding_lncRNA_noncoding_antisense	183494	5	35830000	35835000		'CATG00000079506.1'	noncoding_lncRNA_noncoding_antisense	5000	81	12.032
183499	5	35855000	35860000	IL7R'	'CATG00000079506.1';'IL7R'	noncoding_lncRNA_noncoding_antisense;protein_coding	183500	5	35860000	35865000		'IL7R'	protein_coding	5000	99	11.2652
183503	5	35875000	35880000	IL7R'	'IL7R'	protein_coding	183500	5	35860000	35865000		'IL7R'	protein_coding	15000	14	8.39725
183507	5	35895000	35900000	RP11-79C6.1'	'RP11-79C6.1'	noncoding_pseudogene	183505	5	35885000	35890000		'IL7R'	protein_coding	10000	27	11.7867
183541	5	36065000	36070000	UGT3A2'	'UGT3A2'	protein_coding	183537	5	36045000	36050000		'UGT3A2'	protein_coding	20000	27	27.4131
183557	5	36145000	36150000	MIR580'	'LMBRD2';'MIR580'	noncoding_miRNA;protein_coding	183558	5	36150000	36155000	LMBRD2';RNU6-1305P';SKP2'	'LMBRD2';'SKP2'	protein_coding	5000	173	33.1815
183576	5	36240000	36245000	NADK2'	'CATG00000075586.1';'NADK2'	noncoding_lncRNA_divergent;protein_coding	183577	5	36245000	36250000		'RANBP3L'	protein_coding	5000	90	15.7219
183588	5	36300000	36305000	RANBP3L'	'RANBP3L'	protein_coding	183587	5	36295000	36300000		'RANBP3L'	protein_coding	5000	267	36.7368
183704	5	36880000	36885000	KRT18P31'	'NIPBL'	protein_coding	183702	5	36870000	36875000		'CATG00000079532.1'	noncoding_lncRNA_divergent	10000	29	11.2651
183704	5	36880000	36885000	KRT18P31'	'NIPBL'	protein_coding	183705	5	36885000	36890000	KRT18P31'	'KRT18P31';'NIPBL'	noncoding_pseudogene;protein_coding	5000	189	34.4342
183727	5	36995000	37000000	NIPBL'	'NIPBL'	protein_coding	183728	5	37000000	37005000		'NIPBL'	protein_coding	5000	99	14.0045
183738	5	37050000	37055000	NIPBL'	'NIPBL'	protein_coding	183736	5	37040000	37045000		'NIPBL'	protein_coding	10000	16	4.8503
183769	5	37205000	37210000	C5orf42';OFD1P17'	'C5orf42';'OFD1P17'	noncoding_pseudogene;protein_coding	183771	5	37215000	37220000		'C5orf42'	protein_coding	10000	25	12.5709
183777	5	37245000	37250000	C5orf42';RN7SL37P'	'C5orf42';'CATG00000075606.1';'RN7SL37P'	noncoding_lncRNA_divergent;noncoding_misc_RNA;protein_coding	183778	5	37250000	37255000	C5orf42'	'CATG00000075606.1'	noncoding_lncRNA_divergent	5000	87	13.7117
183778	5	37250000	37255000	C5orf42'	'CATG00000075606.1'	noncoding_lncRNA_divergent	183779	5	37255000	37260000		'CATG00000075606.1'	noncoding_lncRNA_divergent	5000	92	13.1949
1838	1	9185000	9190000	GPR157'	'GPR157'	protein_coding	1839	1	9190000	9195000		'GPR157'	protein_coding	5000	50	4.7153
183872	5	37720000	37725000	WDR70'	'WDR70'	protein_coding	183871	5	37715000	37720000		'WDR70'	protein_coding	5000	85	13.7117
183873	5	37725000	37730000	WDR70'	'WDR70'	protein_coding	183875	5	37735000	37740000		'WDR70'	protein_coding	10000	15	6.303
1843	1	9210000	9215000	MIR34A'	'GPR157';'MIR34A';'RP3-510D11.1'	noncoding_lncRNA_intergenic;noncoding_small_RNA;protein_coding	1839	1	9190000	9195000		'GPR157'	protein_coding	20000	11	8.29229
183986	5	38290000	38295000	EGFLAM-AS4'	'EGFLAM';'EGFLAM-AS4'	noncoding_antisense;protein_coding	183987	5	38295000	38300000		'EGFLAM'	protein_coding	5000	65	7.76201
184034	5	38530000	38535000	LIFR'	'LIFR'	protein_coding	184036	5	38540000	38545000		'LIFR'	protein_coding	10000	26	11.3979
184039	5	38555000	38560000	LIFR';LIFR-AS1';MIR3650'	'LIFR';'LIFR-AS1';'MIR3650'	noncoding_lncRNA_divergent;noncoding_small_RNA;protein_coding	184036	5	38540000	38545000		'LIFR'	protein_coding	15000	12	9.24137
18413	1	92060000	92065000	RP11-91I11.1'			18410	1	92045000	92050000				15000	17	9.20628
18413	1	92060000	92065000	RP11-91I11.1'			18411	1	92050000	92055000				10000	16	5.44816
184122	5	38970000	38975000	RICTOR'	'CATG00000079558.1';'RICTOR'	noncoding_sense_overlap_RNA;protein_coding	184123	5	38975000	38980000		'RICTOR'	protein_coding	5000	52	4.90606
184271	5	39715000	39720000	INTS6P1'	'CATG00000075652.1';'INTS6P1'	noncoding_lncRNA_intergenic;noncoding_pseudogene	184270	5	39710000	39715000				5000	75	5.89712
184271	5	39715000	39720000	INTS6P1'	'CATG00000075652.1';'INTS6P1'	noncoding_lncRNA_intergenic;noncoding_pseudogene	184465	5	40685000	40690000		'PTGER4'	protein_coding	970000	9	11.3392
184341	5	40065000	40070000	KRT18P56'	'KRT18P56'	noncoding_pseudogene	184342	5	40070000	40075000				5000	110	11.9272
18439	1	92190000	92195000	TGFBR3'	'TGFBR3'	protein_coding	18440	1	92195000	92200000		'TGFBR3'	protein_coding	5000	80	10.0351
184391	5	40315000	40320000	AC108105.1'			184392	5	40320000	40325000	AC108105.1'	'AC108105.1'	noncoding_miRNA	5000	52	5.21839
18447	1	92230000	92235000	TGFBR3'	'TGFBR3'	protein_coding	18446	1	92225000	92230000		'TGFBR3'	protein_coding	5000	100	12.8909
184463	5	40675000	40680000	PTGER4'	'CATG00000079614.1';'PTGER4'	noncoding_lncRNA_divergent;protein_coding	184462	5	40670000	40675000		'CATG00000079614.1'	noncoding_lncRNA_divergent	5000	46	5.19946
184494	5	40830000	40835000	RPL37';SNORD72'	'CARD6';'RPL37';'SNORD72'	noncoding_snoRNA;protein_coding	184495	5	40835000	40840000	RPL37'	'CARD6';'RPL37'	protein_coding	5000	54	10.0934
184527	5	40995000	41000000	MROH2B'	'MROH2B'	protein_coding	184526	5	40990000	40995000				5000	84	10.9576
184706	5	41890000	41895000	CTD-2062O1.1'			184704	5	41880000	41885000		'OXCT1-AS1'	noncoding_lncRNA_divergent	10000	28	10.7715
184707	5	41895000	41900000	CTD-2062O1.1'	'CTD-2062O1.1'	noncoding_pseudogene	184708	5	41900000	41905000	C5orf51'	'C5orf51';'CATG00000079648.1'	noncoding_lncRNA_divergent;protein_coding	5000	64	6.84905
18471	1	92350000	92355000	TGFBR3'	'CATG00000008024.1';'TGFBR3'	noncoding_lncRNA_divergent;protein_coding	18472	1	92355000	92360000		'TGFBR3'	protein_coding	5000	80	10.7425
184821	5	42465000	42470000	CTD-2265D6.2';SERBP1P6'	'CTD-2265D6.2';'GHR';'SERBP1P6'	noncoding_pseudogene;protein_coding	184820	5	42460000	42465000		'GHR'	protein_coding	5000	92	12.2759
184821	5	42465000	42470000	CTD-2265D6.2';SERBP1P6'	'CTD-2265D6.2';'GHR';'SERBP1P6'	noncoding_pseudogene;protein_coding	184824	5	42480000	42485000		'GHR'	protein_coding	15000	12	6.20189
184841	5	42565000	42570000	GHR'	'GHR'	protein_coding	184838	5	42550000	42555000		'GHR'	protein_coding	15000	29	23.9372
184879	5	42755000	42760000	CCDC152'	'CCDC152'	protein_coding	184878	5	42750000	42755000				5000	57	5.36569
184905	5	42885000	42890000	SEPP1'	'AC025171.1';'SEPP1'	noncoding_lncRNA_intergenic;protein_coding	184904	5	42880000	42885000		'AC025171.1';'SEPP1'	noncoding_lncRNA_intergenic;protein_coding	5000	79	8.44486
18499	1	92490000	92495000	EPHX4'	'BRDT';'CATG00000066476.1'	noncoding_lncRNA_divergent;protein_coding	18503	1	92510000	92515000		'EPHX4'	protein_coding	20000	25	24.9563
18534	1	92665000	92670000	RP4-775D17.1'	'RP4-775D17.1'	noncoding_pseudogene	18530	1	92645000	92650000		'KIAA1107'	protein_coding	20000	14	12.0915
18574	1	92865000	92870000	RN7SL824P'	'CATG00000066556.1';'RN7SL824P';'RPAP2'	noncoding_lncRNA_noncoding_antisense;noncoding_misc_RNA;protein_coding	18576	1	92875000	92880000		'CATG00000066556.1'	noncoding_lncRNA_noncoding_antisense	10000	23	8.88842
186272	5	49720000	49725000	EMB'	'CATG00000075782.1';'EMB'	noncoding_lncRNA_intergenic;protein_coding	186271	5	49715000	49720000		'CATG00000075782.1';'EMB'	noncoding_lncRNA_intergenic;protein_coding	5000	127	18.0913
186319	5	49955000	49960000	RP11-269M20.3'	'RP11-269M20.3'	noncoding_lncRNA_lincRNA	186299	5	49855000	49860000				100000	5	5.73763
186307	5	49895000	49900000	RP11-269M20.2'	'RP11-269M20.2'	noncoding_pseudogene	186305	5	49885000	49890000				10000	18	6.8748
186398	5	50350000	50355000	RNU6-480P'	'RNU6-480P'	noncoding_snRNA	186396	5	50340000	50345000				10000	31	15.6431
18644	1	93215000	93220000	RP11-330C7.4'	'EVI5'	protein_coding	18642	1	93205000	93210000		'EVI5'	protein_coding	10000	35	17.8207
18652	1	93255000	93260000	EVI5'	'EVI5'	protein_coding	18654	1	93265000	93270000				10000	26	7.68014
18661	1	93300000	93305000	RPL5';SNORA66';SNORD21'	'FAM69A';'RPL5';'SNORA66';'SNORD21'	noncoding_small_RNA;protein_coding	18657	1	93280000	93285000				20000	12	11.777
18680	1	93395000	93400000	RP11-386I23.1'	'FAM69A';'RP11-386I23.1';'RPL5'	noncoding_pseudogene;protein_coding	18681	1	93400000	93405000		'FAM69A';'RPL5'	protein_coding	5000	225	36.7368
186908	5	52900000	52905000	AC024569.1'	'NDUFS4'	protein_coding	186906	5	52890000	52895000		'NDUFS4'	protein_coding	10000	24	9.13283
186909	5	52905000	52910000	AC024569.1'	'AC024569.1';'NDUFS4'	noncoding_miRNA;protein_coding	186906	5	52890000	52895000		'NDUFS4'	protein_coding	15000	12	5.24536
18696	1	93475000	93480000	RNU6-210P'	'RNU6-210P';'RPL5'	noncoding_snRNA;protein_coding	18693	1	93460000	93465000		'RPL5'	protein_coding	15000	24	18.9736
18696	1	93475000	93480000	RNU6-210P'	'RNU6-210P';'RPL5'	noncoding_snRNA;protein_coding	18697	1	93480000	93485000		'RPL5'	protein_coding	5000	123	25.2887
187049	5	53605000	53610000	ARL15'	'ARL15';'LINC01033'	noncoding_lncRNA_divergent;protein_coding	187050	5	53610000	53615000		'LINC01033'	noncoding_lncRNA_divergent	5000	182	36.0437
187065	5	53685000	53690000	LINC01033'	'LINC01033'	noncoding_lncRNA_divergent	187063	5	53675000	53680000		'LINC01033'	noncoding_lncRNA_divergent	10000	22	8.88162
187078	5	53750000	53755000	HSPB3'	'HSPB3';'LINC01033'	noncoding_lncRNA_divergent;protein_coding	187076	5	53740000	53745000		'LINC01033'	noncoding_lncRNA_divergent	10000	32	14.8844
18716	1	93575000	93580000	MTF2'	'MTF2';'RPL5'	protein_coding	18719	1	93590000	93595000	MTF2'	'MTF2';'RPL5'	protein_coding	15000	14	6.97424
18717	1	93580000	93585000	MTF2'	'MTF2';'RPL5'	protein_coding	18719	1	93590000	93595000	MTF2'	'MTF2';'RPL5'	protein_coding	10000	30	12.1168
18719	1	93590000	93595000	MTF2'	'MTF2';'RPL5'	protein_coding	18720	1	93595000	93600000	MTF2'	'CATG00000008359.1';'MTF2';'RPL5'	noncoding_sense_overlap_RNA;protein_coding	5000	70	7.68502
187193	5	54325000	54330000	CTD-2313F11.1';GZMK'	'CTD-2313F11.1';'GZMK'	noncoding_processed_transcript;protein_coding	187194	5	54330000	54335000	CTD-2313F11.1'	'CTD-2313F11.1';'GZMK'	noncoding_processed_transcript;protein_coding	5000	68	8.86193
1872	1	9355000	9360000	SPSB1'	'SPSB1'	protein_coding	1875	1	9370000	9375000		'SPSB1'	protein_coding	15000	29	23.8693
187221	5	54465000	54470000	CDC20B';MIR449A';MIR449B';MIR449C'	'CDC20B';'MIR449A';'MIR449B';'MIR449C'	noncoding_miRNA;noncoding_small_RNA;protein_coding	187320	5	54960000	54965000	SLC38A9'	'SLC38A9'	protein_coding	495000	5	5.02545
187233	5	54525000	54530000	CCNO';RP11-506H20.1'	'CCNO';'RP11-506H20.1'	noncoding_lncRNA_divergent;protein_coding	187234	5	54530000	54535000	RP11-506H20.1'	'CCNO';'RP11-506H20.1'	noncoding_lncRNA_divergent;protein_coding	5000	39	4.61304
187248	5	54600000	54605000	DHX29';SKIV2L2'	'DHX29';'SKIV2L2'	protein_coding	187249	5	54605000	54610000		'DHX29';'SKIV2L2'	protein_coding	5000	347	36.7368
187270	5	54710000	54715000	SKIV2L2'	'PPAP2A';'SKIV2L2'	protein_coding	187273	5	54725000	54730000		'PPAP2A';'SKIV2L2'	protein_coding	15000	14	9.45711
187280	5	54760000	54765000	PPAP2A'	'CATG00000075877.1';'PPAP2A'	noncoding_lncRNA_divergent;protein_coding	187277	5	54745000	54750000		'PPAP2A'	protein_coding	15000	30	23.908
187280	5	54760000	54765000	PPAP2A'	'CATG00000075877.1';'PPAP2A'	noncoding_lncRNA_divergent;protein_coding	187282	5	54770000	54775000		'CATG00000075877.1';'PPAP2A'	noncoding_lncRNA_divergent;protein_coding	10000	43	20.3541
187288	5	54800000	54805000	MIR5687'	'MIR5687';'PPAP2A'	noncoding_miRNA;protein_coding	187291	5	54815000	54820000		'PPAP2A'	protein_coding	15000	13	7.00249
187292	5	54820000	54825000	RNF138P1'	'PPAP2A'	protein_coding	187291	5	54815000	54820000		'PPAP2A'	protein_coding	5000	70	6.97872
187292	5	54820000	54825000	RNF138P1'	'PPAP2A'	protein_coding	187293	5	54825000	54830000	PPAP2A';RNF138P1'	'PPAP2A';'RNF138P1'	noncoding_pseudogene;protein_coding	5000	93	13.2011
187293	5	54825000	54830000	PPAP2A';RNF138P1'	'PPAP2A';'RNF138P1'	noncoding_pseudogene;protein_coding	187294	5	54830000	54835000	PPAP2A'	'CATG00000075878.1';'PPAP2A'	noncoding_lncRNA_divergent;protein_coding	5000	89	12.2905
187297	5	54845000	54850000	AK4P2'	'CATG00000075879.1'	noncoding_lncRNA_intergenic	187302	5	54870000	54875000		'CATG00000075879.1'	noncoding_lncRNA_intergenic	25000	23	28.4891
187316	5	54940000	54945000	SLC38A9'	'SLC38A9'	protein_coding	187315	5	54935000	54940000		'SLC38A9'	protein_coding	5000	224	36.7368
187316	5	54940000	54945000	SLC38A9'	'SLC38A9'	protein_coding	187317	5	54945000	54950000		'SLC38A9'	protein_coding	5000	97	11.6508
187318	5	54950000	54955000	SLC38A9'	'SLC38A9'	protein_coding	187317	5	54945000	54950000		'SLC38A9'	protein_coding	5000	77	7.03248
187318	5	54950000	54955000	SLC38A9'	'SLC38A9'	protein_coding	187319	5	54955000	54960000	SLC38A9'	'SLC38A9'	protein_coding	5000	203	26.7408
187319	5	54955000	54960000	SLC38A9'	'SLC38A9'	protein_coding	187320	5	54960000	54965000	SLC38A9'	'SLC38A9'	protein_coding	5000	446	36.7368
187320	5	54960000	54965000	SLC38A9'	'SLC38A9'	protein_coding	187324	5	54980000	54985000		'SLC38A9'	protein_coding	20000	40	36.7368
187320	5	54960000	54965000	SLC38A9'	'SLC38A9'	protein_coding	187330	5	55010000	55015000		'CATG00000075886.1';'SLC38A9'	protein_coding	50000	5	4.9539
187325	5	54985000	54990000	SLC38A9'	'SLC38A9'	protein_coding	187327	5	54995000	55000000		'SLC38A9'	protein_coding	10000	17	6.9584
187329	5	55005000	55010000	SLC38A9'	'CATG00000075886.1';'SLC38A9'	protein_coding	187330	5	55010000	55015000		'CATG00000075886.1';'SLC38A9'	protein_coding	5000	296	36.7368
187335	5	55035000	55040000	DDX4'	'DDX4';'SLC38A9'	protein_coding	187341	5	55065000	55070000	SLC38A9'	'DDX4';'SLC38A9'	protein_coding	30000	17	24.2179
187354	5	55130000	55135000	HNRNPH1P3'	'HNRNPH1P3';'IL31RA'	noncoding_pseudogene;protein_coding	187352	5	55120000	55125000		'IL31RA'	protein_coding	10000	15	4.61851
187385	5	55285000	55290000	CTD-2031P19.3';IL6ST'	'CTD-2031P19.3';'IL6ST'	noncoding_lncRNA_divergent;protein_coding	187387	5	55295000	55300000	snoU13'	'CTD-2031P19.3';'snoU13'	noncoding_lncRNA_divergent;noncoding_snoRNA	10000	53	27.0652
187387	5	55295000	55300000	snoU13'	'CTD-2031P19.3';'snoU13'	noncoding_lncRNA_divergent;noncoding_snoRNA	187388	5	55300000	55305000				5000	91	11.0537
187398	5	55350000	55355000	CTD-2227I18.1'	'CTD-2227I18.1'	noncoding_lncRNA_intergenic	187397	5	55345000	55350000				5000	107	16.6502
187410	5	55410000	55415000	ANKRD55'	'ANKRD55'	protein_coding	187407	5	55395000	55400000		'ANKRD55';'CTD-2227I18.1'	noncoding_lncRNA_intergenic;protein_coding	15000	19	11.5362
187439	5	55555000	55560000	RNA5SP185'	'CATG00000075893.1';'RNA5SP185'	noncoding_lncRNA_noncoding_antisense;noncoding_rRNA	187554	5	56130000	56135000		'MAP3K1'	protein_coding	575000	7	8.44574
18744	1	93715000	93720000	CCDC18'	'CCDC18'	protein_coding	18746	1	93725000	93730000		'CCDC18';'RP4-717I23.3'	noncoding_lncRNA_divergent;protein_coding	10000	20	7.00097
187478	5	55750000	55755000	AC008391.1'	'AC008391.1';'CTC-236F12.4'	noncoding_miRNA;protein_coding	187480	5	55760000	55765000		'CTC-236F12.4'	protein_coding	10000	26	9.96009
187483	5	55775000	55780000	CTC-236F12.4'	'CATG00000075912.1';'CTC-236F12.4'	noncoding_lncRNA_divergent;protein_coding	187480	5	55760000	55765000		'CTC-236F12.4'	protein_coding	15000	13	6.96565
187487	5	55795000	55800000	AC022431.1'	'CATG00000075913.1'	noncoding_lncRNA_noncoding_antisense	187490	5	55810000	55815000		'AC022431.2';'CATG00000075913.1'	noncoding_lncRNA_noncoding_antisense;protein_coding	15000	29	21.8563
187541	5	56065000	56070000	AC008940.1'	'AC008940.1'	noncoding_lncRNA_lincRNA	187539	5	56055000	56060000				10000	16	5.05525
18756	1	93775000	93780000	RP4-717I23.3'	'RP4-717I23.3'	noncoding_lncRNA_divergent	18758	1	93785000	93790000	RP4-717I23.3'	'RP4-717I23.3'	noncoding_lncRNA_divergent	10000	41	17.6812
18758	1	93785000	93790000	RP4-717I23.3'	'RP4-717I23.3'	noncoding_lncRNA_divergent	18759	1	93790000	93795000	RP4-717I23.3'	'RP4-717I23.3'	noncoding_lncRNA_divergent	5000	180	34.6574
18761	1	93800000	93805000	RP4-717I23.3'	'RP4-717I23.3'	noncoding_lncRNA_divergent	18762	1	93805000	93810000	RP4-717I23.3'	'RP4-717I23.3'	noncoding_lncRNA_divergent	5000	59	8.31755
187620	5	56460000	56465000	Y_RNA'	'CATG00000079883.1';'Y_RNA'	noncoding_lncRNA_divergent;noncoding_misc_RNA	187621	5	56465000	56470000	GPBP1';Y_RNA'	'CATG00000075931.1';'CATG00000079883.1';'GPBP1';'Y_RNA'	noncoding_lncRNA_divergent;noncoding_lncRNA_intergenic;noncoding_misc_RNA;protein_coding	5000	113	20.2088
187620	5	56460000	56465000	Y_RNA'	'CATG00000079883.1';'Y_RNA'	noncoding_lncRNA_divergent;noncoding_misc_RNA	187622	5	56470000	56475000	GPBP1'	'GPBP1'	protein_coding	10000	16	4.95429
187801	5	57365000	57370000	snoU13'	'CATG00000079908.1';'snoU13'	noncoding_snoRNA;uncertain_coding	187800	5	57360000	57365000		'CATG00000079908.1'	uncertain_coding	5000	104	15.0441
187801	5	57365000	57370000	snoU13'	'CATG00000079908.1';'snoU13'	noncoding_snoRNA;uncertain_coding	187802	5	57370000	57375000				5000	100	12.293
192025	5	78485000	78490000	CTC-422A18.1'	'CTC-422A18.1';'DMGDH'	noncoding_pseudogene;protein_coding	187803	5	57375000	57380000		'CATG00000079910.1'	noncoding_lncRNA_intergenic	21110000	5	10.3092
187811	5	57415000	57420000	CTD-2037L6.2'	'CATG00000075973.1';'CTD-2037L6.2'	noncoding_lncRNA_intergenic	187810	5	57410000	57415000		'CATG00000075973.1';'CTD-2037L6.2'	noncoding_lncRNA_intergenic	5000	212	36.7368
187811	5	57415000	57420000	CTD-2037L6.2'	'CATG00000075973.1';'CTD-2037L6.2'	noncoding_lncRNA_intergenic	187813	5	57425000	57430000		'CATG00000075973.1';'CTD-2037L6.2'	noncoding_lncRNA_intergenic	10000	18	5.57743
187811	5	57415000	57420000	CTD-2037L6.2'	'CATG00000075973.1';'CTD-2037L6.2'	noncoding_lncRNA_intergenic	187816	5	57440000	57445000		'CATG00000075973.1';'CTD-2037L6.2'	noncoding_lncRNA_intergenic	25000	7	5.06787
187819	5	57455000	57460000	PGAM1P1'	'CATG00000075973.1';'CTD-2037L6.2';'PGAM1P1'	noncoding_lncRNA_intergenic;noncoding_pseudogene	187816	5	57440000	57445000		'CATG00000075973.1';'CTD-2037L6.2'	noncoding_lncRNA_intergenic	15000	13	6.84176
187878	5	57750000	57755000	PLK2'	'CATG00000075997.1';'PLK2'	noncoding_lncRNA_divergent;protein_coding	187879	5	57755000	57760000	PLK2'	'CATG00000075998.1';'PLK2'	noncoding_lncRNA_divergent;protein_coding	5000	110	16.9957
187886	5	57790000	57795000	GAPT'	'GAPT'	protein_coding	187888	5	57800000	57805000	CTD-2117L12.3'	'GAPT'	protein_coding	10000	23	7.02866
187886	5	57790000	57795000	GAPT'	'GAPT'	protein_coding	187955	5	58135000	58140000		'CATG00000079939.1';'RAB3C'	noncoding_lncRNA_noncoding_antisense;protein_coding	345000	6	6.91991
18791	1	93950000	93955000	RNA5SP53'	'FNBP1L';'RNA5SP53'	noncoding_rRNA;protein_coding	18792	1	93955000	93960000		'FNBP1L'	protein_coding	5000	154	32.1935
18800	1	93995000	94000000	FNBP1L'	'FNBP1L'	protein_coding	18798	1	93985000	93990000		'FNBP1L'	protein_coding	10000	31	15.0021
188030	5	58510000	58515000	PDE4D'	'CATG00000076006.1';'PDE4D'	noncoding_lncRNA_noncoding_antisense;protein_coding	188031	5	58515000	58520000		'CATG00000076006.1';'PDE4D'	noncoding_lncRNA_noncoding_antisense;protein_coding	5000	70	8.41112
188058	5	58650000	58655000	PDE4D'	'PDE4D'	protein_coding	188057	5	58645000	58650000		'PDE4D'	protein_coding	5000	120	21.6847
18813	1	94060000	94065000	RP5-1033H22.2'	'BCAR3';'RP5-1033H22.2'	noncoding_lncRNA_divergent;protein_coding	18809	1	94040000	94045000		'BCAR3';'FNBP1L'	protein_coding	20000	14	11.2711
188092	5	58820000	58825000	NDUFB4P2'	'NDUFB4P2';'PDE4D'	noncoding_pseudogene;protein_coding	188091	5	58815000	58820000		'PDE4D'	protein_coding	5000	223	36.7368
188093	5	58825000	58830000	NDUFB4P2'	'NDUFB4P2';'PDE4D'	noncoding_pseudogene;protein_coding	188095	5	58835000	58840000		'PDE4D'	protein_coding	10000	19	7.83724
188140	5	59060000	59065000	PDE4D'	'CATG00000076016.1';'PDE4D'	noncoding_lncRNA_divergent;protein_coding	188138	5	59050000	59055000		'PDE4D'	protein_coding	10000	43	18.578
18816	1	94075000	94080000	BCAR3'	'BCAR3';'RP5-1033H22.2'	noncoding_lncRNA_divergent;protein_coding	18815	1	94070000	94075000		'BCAR3';'RP5-1033H22.2'	noncoding_lncRNA_divergent;protein_coding	5000	109	17.0032
18816	1	94075000	94080000	BCAR3'	'BCAR3';'RP5-1033H22.2'	noncoding_lncRNA_divergent;protein_coding	18817	1	94080000	94085000	BCAR3'	'BCAR3';'RP5-1033H22.2'	noncoding_lncRNA_divergent;protein_coding	5000	109	17.202
188248	5	59600000	59605000	RNU6-806P'	'PDE4D'	protein_coding	188245	5	59585000	59590000		'PDE4D'	protein_coding	15000	19	14.4072
188291	5	59815000	59820000	PDE4D'	'PART1';'PDE4D'	noncoding_lncRNA_divergent;protein_coding	188290	5	59810000	59815000		'PART1';'PDE4D'	noncoding_lncRNA_divergent;protein_coding	5000	67	8.91053
188356	5	60140000	60145000	ELOVL7'	'ELOVL7'	protein_coding	188354	5	60130000	60135000		'ELOVL7'	protein_coding	10000	13	4.81835
188365	5	60185000	60190000	GNL3LP1'	'ERCC8';'GNL3LP1'	noncoding_pseudogene;protein_coding	188364	5	60180000	60185000		'ERCC8'	protein_coding	5000	50	4.64081
188410	5	60410000	60415000	AC008498.1'	'AC008498.1';'NDUFAF2'	protein_coding	188412	5	60420000	60425000		'NDUFAF2'	protein_coding	10000	46	24.9533
188437	5	60545000	60550000	CTC-436P18.3'	'CATG00000079996.1';'CTC-436P18.3'	noncoding_lncRNA_lincRNA;uncertain_coding	188436	5	60540000	60545000		'CATG00000079996.1';'CTC-436P18.3'	noncoding_lncRNA_lincRNA;uncertain_coding	5000	72	7.22194
188437	5	60545000	60550000	CTC-436P18.3'	'CATG00000079996.1';'CTC-436P18.3'	noncoding_lncRNA_lincRNA;uncertain_coding	188438	5	60550000	60555000		'CATG00000079996.1';'CTC-436P18.3'	noncoding_lncRNA_lincRNA;uncertain_coding	5000	83	9.23536
188439	5	60555000	60560000	CTC-436P18.3'	'CATG00000079996.1';'CTC-436P18.3'	noncoding_lncRNA_lincRNA;uncertain_coding	188438	5	60550000	60555000		'CATG00000079996.1';'CTC-436P18.3'	noncoding_lncRNA_lincRNA;uncertain_coding	5000	66	7.90996
188514	5	60930000	60935000	C5orf64'	'C5orf64'	protein_coding	188511	5	60915000	60920000		'C5orf64';'CATG00000080008.1'	noncoding_lncRNA_intergenic;protein_coding	15000	22	17.9201
188516	5	60940000	60945000	C5orf64'	'C5orf64'	protein_coding	188517	5	60945000	60950000		'C5orf64'	protein_coding	5000	185	31.9165
188519	5	60955000	60960000	RNU6-913P'	'C5orf64';'RNU6-913P';'RP11-2O17.2'	noncoding_lncRNA_noncoding_antisense;noncoding_snRNA;protein_coding	188517	5	60945000	60950000		'C5orf64'	protein_coding	10000	31	12.4428
188520	5	60960000	60965000	RNU6-913P'	'C5orf64';'RNU6-913P';'RP11-2O17.2'	noncoding_lncRNA_noncoding_antisense;noncoding_snRNA;protein_coding	188521	5	60965000	60970000		'C5orf64';'RP11-2O17.2'	noncoding_lncRNA_noncoding_antisense;protein_coding	5000	96	16.9679
188616	5	61440000	61445000	RN7SKP157'	'RN7SKP157'	noncoding_misc_RNA	188615	5	61435000	61440000				5000	68	5.37641
188667	5	61695000	61700000	DIMT1';IPO11'	'DIMT1';'IPO11';'KIF2A'	protein_coding	188669	5	61705000	61710000	IPO11'	'IPO11';'KIF2A'	protein_coding	10000	29	12.0003
188680	5	61760000	61765000	IPO11'	'IPO11';'KIF2A'	protein_coding	188683	5	61775000	61780000		'IPO11';'KIF2A'	protein_coding	15000	27	21.9896
18875	1	94370000	94375000	GCLM'	'CATG00000008510.1';'GCLM'	noncoding_lncRNA_divergent;protein_coding	18873	1	94360000	94365000		'GCLM'	protein_coding	10000	16	6.58789
18875	1	94370000	94375000	GCLM'	'CATG00000008510.1';'GCLM'	noncoding_lncRNA_divergent;protein_coding	18876	1	94375000	94380000	GCLM'	'CATG00000008510.1';'GCLM'	noncoding_lncRNA_divergent;protein_coding	5000	73	8.17241
18906	1	94525000	94530000	ABCA4'	'ABCA4'	protein_coding	18907	1	94530000	94535000		'ABCA4'	protein_coding	5000	93	12.415
189084	5	63780000	63785000	AC016561.1'	'AC016561.1'	noncoding_pseudogene	189085	5	63785000	63790000				5000	53	4.88503
189088	5	63800000	63805000	RGS7BP'	'CATG00000080033.1';'RGS7BP'	noncoding_lncRNA_divergent;protein_coding	189087	5	63795000	63800000				5000	87	11.85
189190	5	64310000	64315000	RP11-307L14.1'	'CWC27'	protein_coding	189188	5	64300000	64305000		'CWC27'	protein_coding	10000	19	6.33215
189190	5	64310000	64315000	RP11-307L14.1'	'CWC27'	protein_coding	189191	5	64315000	64320000	RP11-307L14.1';RP11-307L14.2'	'CWC27';'RP11-307L14.1';'RP11-307L14.2'	noncoding_lncRNA_lincRNA;protein_coding	5000	91	9.94181
189283	5	64775000	64780000	ADAMTS6'	'ADAMTS6';'CATG00000076098.1';'CENPK'	noncoding_lncRNA_divergent;protein_coding	189286	5	64790000	64795000		'CENPK'	protein_coding	15000	10	5.2135
18931	1	94650000	94655000	ARHGAP29'	'ARHGAP29'	protein_coding	18929	1	94640000	94645000		'ARHGAP29'	protein_coding	10000	28	8.27401
189309	5	64905000	64910000	TRIM23'	'TRIM23'	protein_coding	189312	5	64920000	64925000	CTC-534A2.2';TRAPPC13';TRIM23'	'CTC-534A2.2';'TRAPPC13';'TRIM23'	protein_coding	15000	18	10.4653
189314	5	64930000	64935000	TRAPPC13'	'TRAPPC13'	protein_coding	189315	5	64935000	64940000		'TRAPPC13'	protein_coding	5000	108	13.8779
189318	5	64950000	64955000	TRAPPC13'	'SGTB';'TRAPPC13'	protein_coding	189317	5	64945000	64950000		'TRAPPC13'	protein_coding	5000	350	36.7368
189331	5	65015000	65020000	NLN';SGTB'	'NLN';'SGTB';'TRAPPC13'	protein_coding	189334	5	65030000	65035000		'NLN';'TRAPPC13'	protein_coding	15000	12	5.70472
189333	5	65025000	65030000	CTD-2353N24.1'	'CTD-2353N24.1';'NLN';'TRAPPC13'	noncoding_pseudogene;protein_coding	189334	5	65030000	65035000		'NLN';'TRAPPC13'	protein_coding	5000	57	5.74371
189350	5	65110000	65115000	NLN'	'NLN';'TRAPPC13'	protein_coding	189353	5	65125000	65130000		'NLN';'TRAPPC13'	protein_coding	15000	15	7.98714
189351	5	65115000	65120000	NLN'	'NLN';'TRAPPC13'	protein_coding	189353	5	65125000	65130000		'NLN';'TRAPPC13'	protein_coding	10000	45	23.5743
189371	5	65215000	65220000	CTD-2033C11.1'	'CTD-2033C11.1';'TRAPPC13'	noncoding_lncRNA_divergent;protein_coding	189374	5	65230000	65235000		'ERBB2IP';'TRAPPC13'	protein_coding	15000	8	5.97459
189384	5	65280000	65285000	ERBB2IP'	'ERBB2IP'	protein_coding	189383	5	65275000	65280000		'ERBB2IP'	protein_coding	5000	66	9.57926
189391	5	65315000	65320000	ERBB2IP'	'ERBB2IP'	protein_coding	189390	5	65310000	65315000		'ERBB2IP'	protein_coding	5000	175	30.7836
189414	5	65430000	65435000	SREK1'			189412	5	65420000	65425000				10000	38	16.5538
189414	5	65430000	65435000	SREK1'			189415	5	65435000	65440000	AC025442.3';SREK1'	'AC025442.3';'CATG00000080057.1'	noncoding_antisense;noncoding_lncRNA_divergent	5000	112	17.0129
189420	5	65460000	65465000	SREK1'	'SREK1'	protein_coding	189421	5	65465000	65470000	SREK1'	'SREK1'	protein_coding	5000	93	11.0189
189421	5	65465000	65470000	SREK1'	'SREK1'	protein_coding	189422	5	65470000	65475000	SREK1'	'SREK1'	protein_coding	5000	77	6.80204
18943	1	94710000	94715000	RP11-148B18.1'	'ARHGAP29';'RP11-148B18.1'	noncoding_lncRNA_divergent;protein_coding	18944	1	94715000	94720000		'ARHGAP29';'RP11-148B18.1'	noncoding_lncRNA_divergent;protein_coding	5000	70	10.5608
18958	1	94785000	94790000	RP11-148B18.4'	'ARHGAP29';'RP11-148B18.4'	noncoding_lncRNA_intergenic;protein_coding	18944	1	94715000	94720000		'ARHGAP29';'RP11-148B18.1'	noncoding_lncRNA_divergent;protein_coding	70000	5	7.15132
189534	5	66030000	66035000	MAST4'	'MAST4'	protein_coding	189535	5	66035000	66040000		'MAST4'	protein_coding	5000	87	12.4093
189578	5	66250000	66255000	MAST4'	'MAST4'	protein_coding	189579	5	66255000	66260000	MAST4'	'MAST4'	protein_coding	5000	73	8.95506
189587	5	66295000	66300000	MAST4';MAST4-AS1'	'MAST4';'MAST4-AS1'	noncoding_lncRNA_divergent;protein_coding	189584	5	66280000	66285000		'MAST4';'MAST4-AS1'	noncoding_lncRNA_divergent;protein_coding	15000	13	6.99675
189587	5	66295000	66300000	MAST4';MAST4-AS1'	'MAST4';'MAST4-AS1'	noncoding_lncRNA_divergent;protein_coding	189588	5	66300000	66305000	MAST4';MAST4-AS1'	'MAST4';'MAST4-AS1'	noncoding_lncRNA_divergent;protein_coding	5000	79	11.9052
189622	5	66470000	66475000	CTD-2306M10.1'	'CD180';'MAST4'	protein_coding	189619	5	66455000	66460000		'CATG00000080069.1';'MAST4'	protein_coding	15000	17	9.44731
189624	5	66480000	66485000	CD180'	'CD180';'MAST4'	protein_coding	189619	5	66455000	66460000		'CATG00000080069.1';'MAST4'	protein_coding	25000	9	6.18282
189624	5	66480000	66485000	CD180'	'CD180';'MAST4'	protein_coding	189628	5	66500000	66505000				20000	8	4.72659
189640	5	66560000	66565000	CTD-2187J20.1'	'CATG00000076143.1';'CTD-2187J20.1'	noncoding_lncRNA_intergenic;noncoding_lncRNA_lincRNA	189641	5	66565000	66570000		'CATG00000076143.1';'CTD-2187J20.1'	noncoding_lncRNA_intergenic;noncoding_lncRNA_lincRNA	5000	116	18.3413
189710	5	66910000	66915000	RP11-434D9.1'	'RP11-434D9.1'	noncoding_lncRNA_intergenic	189714	5	66930000	66935000	RP11-83M16.2'	'RP11-434D9.1';'RP11-83M16.2';'RP11-83M16.5'	noncoding_lncRNA_intergenic;noncoding_pseudogene	20000	9	5.08674
189716	5	66940000	66945000	RP11-83M16.5'	'RP11-434D9.1';'RP11-83M16.5'	noncoding_lncRNA_intergenic	189717	5	66945000	66950000		'RP11-434D9.1';'RP11-83M16.5'	noncoding_lncRNA_intergenic	5000	105	14.9969
189724	5	66980000	66985000	RP11-83M16.3'	'RP11-434D9.1';'RP11-83M16.5'	noncoding_lncRNA_intergenic	189725	5	66985000	66990000	RP11-83M16.3';RP11-83M16.4'	'RP11-434D9.1';'RP11-83M16.3';'RP11-83M16.4';'RP11-83M16.5'	noncoding_lncRNA_intergenic;noncoding_pseudogene	5000	155	25.267
189725	5	66985000	66990000	RP11-83M16.3';RP11-83M16.4'	'RP11-434D9.1';'RP11-83M16.3';'RP11-83M16.4';'RP11-83M16.5'	noncoding_lncRNA_intergenic;noncoding_pseudogene	189727	5	66995000	67000000		'RP11-434D9.1';'RP11-83M16.5';'RP11-83M16.6'	noncoding_lncRNA_intergenic;noncoding_lncRNA_lincRNA	10000	34	13.1336
18977	1	94880000	94885000	ABCD3'	'ABCD3';'CATG00000066949.1'	noncoding_lncRNA_divergent;protein_coding	18979	1	94890000	94895000		'ABCD3'	protein_coding	10000	21	8.9061
189825	5	67485000	67490000	RP11-404L6.2'	'CATG00000080084.1';'RP11-404L6.2'	noncoding_lncRNA_divergent;protein_coding	189827	5	67495000	67500000		'RP11-404L6.2'	protein_coding	10000	29	9.69401
189843	5	67575000	67580000	PIK3R1'	'PIK3R1'	protein_coding	189844	5	67580000	67585000	PIK3R1'	'PIK3R1'	protein_coding	5000	67	9.70415
189862	5	67670000	67675000	CTD-2582M21.1'	'CTC-537E7.3';'CTD-2582M21.1'	noncoding_lncRNA_intergenic;noncoding_lncRNA_lincRNA	189860	5	67660000	67665000				10000	25	9.90352
189873	5	67725000	67730000	CTC-537E7.3'	'CTC-537E7.3'	noncoding_lncRNA_intergenic	189872	5	67720000	67725000		'CTC-537E7.3'	noncoding_lncRNA_intergenic	5000	193	27.8884
189874	5	67730000	67735000	CTC-537E7.3'	'CTC-537E7.3'	noncoding_lncRNA_intergenic	189876	5	67740000	67745000		'CTC-537E7.2';'CTC-537E7.3'	noncoding_lncRNA_intergenic	10000	20	6.95012
189891	5	67815000	67820000	CTC-537E7.1'	'CATG00000076186.1';'CTC-537E7.1';'CTC-537E7.2';'CTC-537E7.3'	noncoding_lncRNA_intergenic;noncoding_lncRNA_lincRNA	189893	5	67825000	67830000	CTC-537E7.2'	'CATG00000076186.1';'CTC-537E7.1';'CTC-537E7.2';'CTC-537E7.3'	noncoding_lncRNA_intergenic;noncoding_lncRNA_lincRNA	10000	23	10.3145
189893	5	67825000	67830000	CTC-537E7.2'	'CATG00000076186.1';'CTC-537E7.1';'CTC-537E7.2';'CTC-537E7.3'	noncoding_lncRNA_intergenic;noncoding_lncRNA_lincRNA	189894	5	67830000	67835000	CTC-537E7.2'	'CTC-537E7.2';'CTC-537E7.3'	noncoding_lncRNA_intergenic	5000	60	6.88224
189894	5	67830000	67835000	CTC-537E7.2'	'CTC-537E7.2';'CTC-537E7.3'	noncoding_lncRNA_intergenic	189895	5	67835000	67840000		'CTC-537E7.2';'CTC-537E7.3'	noncoding_lncRNA_intergenic	5000	145	24.7788
189962	5	68170000	68175000	U8'	'CTC-340D7.1';'CTC-537E7.3'	noncoding_lncRNA_intergenic;noncoding_lncRNA_lincRNA	189964	5	68180000	68185000		'CTC-340D7.1';'CTC-537E7.3'	noncoding_lncRNA_intergenic;noncoding_lncRNA_lincRNA	10000	50	21.3408
189992	5	68320000	68325000	7SK'	'7SK';'CTC-498J12.1'	noncoding_lncRNA_intergenic;noncoding_lncRNA_lincRNA	189993	5	68325000	68330000	7SK'	'7SK';'CTC-498J12.1'	noncoding_lncRNA_intergenic;noncoding_lncRNA_lincRNA	5000	252	36.7368
189993	5	68325000	68330000	7SK'	'7SK';'CTC-498J12.1'	noncoding_lncRNA_intergenic;noncoding_lncRNA_lincRNA	189995	5	68335000	68340000	CTC-498J12.1'	'CTC-498J12.1'	noncoding_lncRNA_intergenic	10000	38	16.9912
189995	5	68335000	68340000	CTC-498J12.1'	'CTC-498J12.1'	noncoding_lncRNA_intergenic	189996	5	68340000	68345000	CTC-498J12.1'			5000	71	7.54698
190010	5	68410000	68415000	SLC30A5'	'CTC-498J12.3';'SLC30A5'	noncoding_antisense;protein_coding	190012	5	68420000	68425000	SLC30A5'	'CTC-498J12.3';'SLC30A5'	noncoding_antisense;protein_coding	10000	27	11.9957
190057	5	68645000	68650000	RP11-1113N2.4'	'RP11-1113N2.4';'TAF9'	noncoding_pseudogene;protein_coding	190061	5	68665000	68670000	RAD17';TAF9'	'RAD17';'TAF9'	protein_coding	20000	8	6.58576
190063	5	68675000	68680000	RAD17'	'RAD17'	protein_coding	190069	5	68705000	68710000	MARVELD2'	'RAD17'	protein_coding	30000	10	12.4163
190085	5	68785000	68790000	OCLN'	'CATG00000080157.1';'OCLN';'RP11-241G9.3'	noncoding_antisense;noncoding_lncRNA_divergent;protein_coding	190086	5	68790000	68795000		'GUSBP3';'OCLN';'RP11-241G9.3'	noncoding_antisense;noncoding_pseudogene;protein_coding	5000	64	6.88453
190087	5	68795000	68800000	OCLN';RP11-241G9.3'	'GUSBP3';'OCLN';'RP11-241G9.3'	noncoding_antisense;noncoding_pseudogene;protein_coding	190086	5	68790000	68795000		'GUSBP3';'OCLN';'RP11-241G9.3'	noncoding_antisense;noncoding_pseudogene;protein_coding	5000	179	34.3389
190087	5	68795000	68800000	OCLN';RP11-241G9.3'	'GUSBP3';'OCLN';'RP11-241G9.3'	noncoding_antisense;noncoding_pseudogene;protein_coding	190089	5	68805000	68810000		'GUSBP3';'OCLN'	noncoding_pseudogene;protein_coding	10000	43	20.4834
19012	1	95055000	95060000	RP11-86H7.6'	'CATG00000008939.1';'RP11-86H7.6'	noncoding_lncRNA_intergenic;noncoding_lncRNA_lincRNA	19011	1	95050000	95055000		'CATG00000008939.1';'RP11-86H7.6'	noncoding_lncRNA_intergenic;noncoding_lncRNA_lincRNA	5000	49	4.81435
19024	1	95115000	95120000	KATNBL1P2'	'CATG00000008939.1';'KATNBL1P2';'LINC01057'	noncoding_lncRNA_divergent;noncoding_lncRNA_intergenic;noncoding_pseudogene	19026	1	95125000	95130000		'CATG00000008939.1';'LINC01057'	noncoding_lncRNA_divergent;noncoding_lncRNA_intergenic	10000	18	5.55905
19029	1	95140000	95145000	PGBD4P7'	'CATG00000008939.1';'LINC01057'	noncoding_lncRNA_divergent;noncoding_lncRNA_intergenic	19027	1	95130000	95135000		'CATG00000008939.1';'LINC01057'	noncoding_lncRNA_divergent;noncoding_lncRNA_intergenic	10000	18	6.70522
19042	1	95205000	95210000	LINC01057'	'LINC01057'	noncoding_lncRNA_divergent	19043	1	95210000	95215000	MIR378G'	'LINC01057';'MIR378G'	noncoding_lncRNA_divergent;noncoding_miRNA	5000	115	18.5268
19043	1	95210000	95215000	MIR378G'	'LINC01057';'MIR378G'	noncoding_lncRNA_divergent;noncoding_miRNA	19044	1	95215000	95220000		'LINC01057'	noncoding_lncRNA_divergent	5000	85	11.2037
190485	5	70785000	70790000	BDP1'	'BDP1'	protein_coding	190484	5	70780000	70785000		'BDP1'	protein_coding	5000	96	13.4605
190485	5	70785000	70790000	BDP1'	'BDP1'	protein_coding	190487	5	70795000	70800000		'BDP1'	protein_coding	10000	16	5.17014
190485	5	70785000	70790000	BDP1'	'BDP1'	protein_coding	190488	5	70800000	70805000		'BDP1'	protein_coding	15000	10	4.907
190491	5	70815000	70820000	BDP1'	'BDP1'	protein_coding	190489	5	70805000	70810000		'BDP1'	protein_coding	10000	18	5.45488
190491	5	70815000	70820000	BDP1'	'BDP1'	protein_coding	190493	5	70825000	70830000	BDP1'	'BDP1'	protein_coding	10000	16	4.72026
190494	5	70830000	70835000	HMGN1P12'	'BDP1';'HMGN1P12'	noncoding_pseudogene;protein_coding	190495	5	70835000	70840000		'BDP1'	protein_coding	5000	57	6.1389
190506	5	70890000	70895000	MCCC2'	'MCCC2'	protein_coding	190507	5	70895000	70900000	MCCC2'	'CATG00000080166.1';'MCCC2'	noncoding_lncRNA_divergent;protein_coding	5000	71	8.00049
190509	5	70905000	70910000	AC143336.1'	'MCCC2'	protein_coding	190510	5	70910000	70915000	AC143336.1'	'AC143336.1';'MCCC2'	noncoding_miRNA;protein_coding	5000	135	23.8037
190621	5	71465000	71470000	MIR4803'	'MAP1B';'MIR4803'	noncoding_miRNA;protein_coding	190623	5	71475000	71480000	MAP1B'	'MAP1B'	protein_coding	10000	71	36.7368
190632	5	71520000	71525000	MRPS27'	'MRPS27'	protein_coding	190633	5	71525000	71530000		'MRPS27'	protein_coding	5000	99	13.0034
190645	5	71585000	71590000	MRPS27'	'MRPS27'	protein_coding	190643	5	71575000	71580000		'MRPS27'	protein_coding	10000	47	24.61
190645	5	71585000	71590000	MRPS27'	'MRPS27'	protein_coding	190646	5	71590000	71595000		'MRPS27'	protein_coding	5000	70	8.57294
190648	5	71600000	71605000	MRPS27'	'MRPS27'	protein_coding	190649	5	71605000	71610000	RN7SL153P'	'MRPS27'	protein_coding	5000	66	8.31139
190654	5	71630000	71635000	PTCD2'	'PTCD2'	protein_coding	190652	5	71620000	71625000		'PTCD2'	protein_coding	10000	35	15.8251
190688	5	71800000	71805000	ZNF366'	'CATG00000076244.1';'ZNF366'	noncoding_lncRNA_noncoding_antisense;protein_coding	190690	5	71810000	71815000		'CATG00000076244.1'	noncoding_lncRNA_noncoding_antisense	10000	29	12.1196
190702	5	71870000	71875000	CTC-347C20.2'	'CATG00000076246.1';'CTC-347C20.2';'CTD-2631K10.1'	noncoding_lncRNA_divergent;noncoding_lncRNA_lincRNA;uncertain_coding	190704	5	71880000	71885000		'CATG00000076246.1';'CTC-347C20.2';'CTD-2631K10.1'	noncoding_lncRNA_divergent;noncoding_lncRNA_lincRNA;uncertain_coding	10000	27	9.0098
19074	1	95365000	95370000	CNN3'	'CNN3'	protein_coding	19073	1	95360000	95365000		'CNN3';'SLC44A3'	protein_coding	5000	72	6.4704
190756	5	72140000	72145000	TNPO1'	'TNPO1'	protein_coding	190757	5	72145000	72150000	TNPO1'	'TNPO1'	protein_coding	5000	288	36.7368
190761	5	72165000	72170000	TNPO1'	'TNPO1'	protein_coding	190762	5	72170000	72175000	CTD-2339M3.1';MIR4804'	'CTD-2339M3.1';'MIR4804';'TNPO1'	noncoding_pseudogene;noncoding_small_RNA;protein_coding	5000	63	5.66563
190765	5	72185000	72190000	TNPO1'	'TNPO1'	protein_coding	190764	5	72180000	72185000		'TNPO1'	protein_coding	5000	170	32.4193
190765	5	72185000	72190000	TNPO1'	'TNPO1'	protein_coding	190766	5	72190000	72195000	TNPO1'	'TNPO1'	protein_coding	5000	97	14.5365
190777	5	72245000	72250000	CTD-2376I4.1'	'CTD-2376I4.1';'CTD-2376I4.2'	noncoding_lncRNA_divergent;noncoding_lncRNA_lincRNA	190778	5	72250000	72255000	CTD-2376I4.1';CTD-2376I4.2';FCHO2'	'CTD-2376I4.1';'CTD-2376I4.2';'FCHO2'	noncoding_lncRNA_divergent;noncoding_lncRNA_lincRNA;protein_coding	5000	119	24.726
190845	5	72585000	72590000	RP11-60A8.1'	'RP11-60A8.1'	noncoding_lncRNA_intergenic	190843	5	72575000	72580000		'RP11-60A8.1'	noncoding_lncRNA_intergenic	10000	37	16.6315
19086	1	95425000	95430000	RP4-639F20.1'	'RP4-639F20.1'	noncoding_lncRNA_divergent	19085	1	95420000	95425000		'RP4-639F20.1'	noncoding_lncRNA_divergent	5000	61	6.66601
190854	5	72630000	72635000	RP11-60A8.2'	'RP11-60A8.2'	noncoding_lncRNA_lincRNA	190855	5	72635000	72640000				5000	104	12.9285
190868	5	72700000	72705000	RP11-79P5.3'	'CATG00000080195.1';'RP11-79P5.3'	noncoding_lncRNA_intergenic;noncoding_pseudogene	190871	5	72715000	72720000		'CATG00000076262.1';'CATG00000080195.1'	noncoding_lncRNA_intergenic	15000	11	6.30732
190889	5	72805000	72810000	AC099522.2'	'AC099522.2'	noncoding_pseudogene	190890	5	72810000	72815000				5000	71	10.0697
[truncated: 10,269 more rows]

## Sheet: Supplementary Table 4b
Supplementary Table 4b. List of identified enhancer-promoter interactions from Hi-C interactions in PC3 cell line
Pomoter								Enhancer
F1_ID	chr	start	end	promoter_region_of_gene	gene_symbol	gene_type	F2_ID	chr	start	end	promoter_region_of_gene	gene_symbol	gene_type	distance	interacting_read	logpvalue
100207	3	8575000	8580000	AGRN'	'LMCD1'	protein_coding	100206	3	8570000	8575000		'LMCD1'	protein_coding	5000	20	5.27785
100246	3	8770000	8775000	CCNL2';RN7SL657P';RP4-758J18.2'	'SSUH2'	protein_coding	100245	3	8765000	8770000		'SSUH2'	protein_coding	5000	20	4.91466
100369	3	9385000	9390000	AL590822.2';C1orf86'	'RP11-380O24.1';'SRGAP3'	noncoding_lncRNA_divergent;protein_coding	100370	3	9390000	9395000	PGAM1P4'	'PGAM1P4';'RP11-380O24.1';'SETD5-AS1';'SRGAP3'	noncoding_lncRNA_divergent;noncoding_pseudogene;protein_coding	5000	67	31.3252
100450	3	9790000	9795000	NPHP4'	'OGG1'	protein_coding	100451	3	9795000	9800000	CAMK1';OGG1'	'CAMK1';'OGG1'	protein_coding	5000	33	11.4964
100467	3	9875000	9880000	NPHP4'	'ARPC4-TTLL3';'RPUSD3';'TTLL3'	protein_coding	100469	3	9885000	9890000	RPUSD3'	'RPUSD3';'TTLL3'	protein_coding	10000	23	18.2529
100476	3	9920000	9925000	NPHP4'	'CIDEC'	protein_coding	100477	3	9925000	9930000				5000	36	13.5001
100478	3	9930000	9935000	NPHP4'	'CATG00000059143.1';'JAGN1'	noncoding_lncRNA_intergenic;protein_coding	100477	3	9925000	9930000				5000	46	19.3568
100480	3	9940000	9945000	CHD5'	'CATG00000059143.1';'IL17RE'	noncoding_lncRNA_intergenic;protein_coding	100486	3	9970000	9975000	CRELD1';IL17RC'	'CATG00000063716.1';'IL17RC'	noncoding_lncRNA_divergent;protein_coding	30000	7	7.24046
100543	3	10255000	10260000	ICMT';LINC00337'	'IRAK2';'RNU6-814P'	noncoding_small_RNA;protein_coding	100544	3	10260000	10265000		'IRAK2'	protein_coding	5000	76	36.0437
100932	3	12200000	12205000	CASZ1'	'SYN2';'TIMP4'	noncoding_lncRNA_intergenic;protein_coding	100938	3	12230000	12235000		'CATG00000063762.1';'SYN2'	noncoding_lncRNA_intergenic	30000	5	4.67405
100970	3	12390000	12395000	Y_RNA'	'PPARG'	protein_coding	100969	3	12385000	12390000		'PPARG'	protein_coding	5000	104	36.7368
101051	3	12795000	12800000	VPS13D'	'CAND2';'TMEM40'	protein_coding	101052	3	12800000	12805000	TMEM40'	'CAND2';'TMEM40'	protein_coding	5000	107	36.7368
101052	3	12800000	12805000	PRAMEF11'	'CAND2';'TMEM40'	protein_coding	101068	3	12880000	12885000	RPL32';SNORA7A'	'CAND2';'RPL32';'SNORA7A'	noncoding_small_RNA;protein_coding	80000	7	8.05862
101097	3	13025000	13030000	RP11-344F13.1'	'IQSEC1'	protein_coding	101099	3	13035000	13040000	IQSEC1'	'CATG00000063794.1';'IQSEC1'	noncoding_lncRNA_noncoding_sense_intronic;protein_coding	10000	12	7.22396
101275	3	13915000	13920000	CLCNKA';HSPB7'	'WNT7A'	protein_coding	101271	3	13895000	13900000		'WNT7A'	protein_coding	20000	7	6.04108
101360	3	14340000	14345000	RNU1-1'	'RP11-536I6.2'	noncoding_lncRNA_intergenic	101359	3	14335000	14340000		'RP11-536I6.2'	noncoding_lncRNA_intergenic	5000	30	9.46696
101519	3	15135000	15140000	NBPF1'	'ZFYVE20'	protein_coding	101520	3	15140000	15145000	ZFYVE20'	'CATG00000059260.1';'ZFYVE20'	noncoding_lncRNA_divergent;protein_coding	5000	32	11.3514
101535	3	15215000	15220000	NBPF1'	'COL6A4P1'	noncoding_pseudogene	101537	3	15225000	15230000		'COL6A4P1'	noncoding_pseudogene	10000	10	5.57466
104605	3	30565000	30570000	RPS6KA1'	'AC116035.1';'AC116035.2';'CATG00000059678.1';'CATG00000064106.1'	noncoding_lncRNA_intergenic;noncoding_lncRNA_lincRNA	104604	3	30560000	30565000		'AC116035.2';'CATG00000059678.1'	noncoding_lncRNA_intergenic	5000	32	10.9903
104625	3	30665000	30670000	MIR1976';RPS6KA1'	'AC096921.2';'CATG00000064110.1';'TGFBR2'	noncoding_lncRNA_divergent;noncoding_pseudogene;protein_coding	104626	3	30670000	30675000		'CATG00000064110.1';'TGFBR2'	noncoding_lncRNA_divergent;protein_coding	5000	31	10.2082
104754	3	31310000	31315000	ARID1A'	'AC115283.1';'CATG00000064114.1'	noncoding_pseudogene;uncertain_coding	104755	3	31315000	31320000		'CATG00000064114.1'	uncertain_coding	5000	75	34.945
10488	1	52435000	52440000	RNU6-48P';RP11-4K3__A.5'	'RAB3B';'RNA5SP48'	noncoding_rRNA;protein_coding	10489	1	52440000	52445000	RNA5SP48'	'RAB3B'	protein_coding	5000	35	12.6978
10567	1	52830000	52835000	RP11-266K22.2'	'CATG00000001007.1';'CC2D1B';'PLA2G12AP1'	noncoding_lncRNA_divergent;noncoding_pseudogene;protein_coding	10575	1	52870000	52875000	ORC1';PRPF38A'	'ORC1';'PRPF38A';'ZCCHC11'	protein_coding	40000	5	5.35809
10574	1	52865000	52870000	FABP3'	'ORC1'	protein_coding	10575	1	52870000	52875000	ORC1';PRPF38A'	'ORC1';'PRPF38A';'ZCCHC11'	protein_coding	5000	52	22.5276
105894	3	37010000	37015000	RP4-534N18.2'	'RP11-129K12.1';'TRANK1'	noncoding_lncRNA_lincRNA;protein_coding	105898	3	37030000	37035000	MLH1'	'CATG00000059784.1';'EPM2AIP1';'MLH1';'TRANK1'	noncoding_lncRNA_divergent;protein_coding	20000	6	4.75644
106099	3	38035000	38040000	TMEM54'	'CATG00000064243.1';'VILL'	noncoding_lncRNA_divergent;protein_coding	106101	3	38045000	38050000	PLCD1';VILL'	'PLCD1';'VILL'	protein_coding	10000	11	6.46026
106126	3	38170000	38175000	RP1-117O3.2';RP4-803A2.2'	'ACAA1'	protein_coding	106127	3	38175000	38180000	ACAA1';MYD88'	'ACAA1';'MYD88'	protein_coding	5000	43	16.2542
106190	3	38490000	38495000	PHC2'	'ACVR2B-AS1'	noncoding_lncRNA_intergenic	106191	3	38495000	38500000	ACVR2B';ACVR2B-AS1'	'ACVR2B';'ACVR2B-AS1'	noncoding_lncRNA_intergenic;protein_coding	5000	28	8.64726
106265	3	38865000	38870000	AGO4'	'RP11-134J21.1'	noncoding_antisense	106267	3	38875000	38880000				10000	11	6.24464
106319	3	39135000	39140000	MAP7D1'	'GORASP1';'WDR48'	protein_coding	106321	3	39145000	39150000	GORASP1';TTC21A'	'GORASP1';'TTC21A'	protein_coding	10000	16	10.9302
106748	3	41280000	41285000	SMAP2'	'CTNNB1';'ULK4'	protein_coding	106749	3	41285000	41290000		'CTNNB1';'ULK4'	protein_coding	5000	23	5.8642
106929	3	42185000	42190000	KCNQ4'	'TPMTP2';'TRAK1'	noncoding_pseudogene;protein_coding	106926	3	42170000	42175000		'TRAK1'	protein_coding	15000	8	6.05967
106932	3	42200000	42205000	KCNQ4'	'TRAK1'	protein_coding	106926	3	42170000	42175000		'TRAK1'	protein_coding	30000	6	5.87623
106938	3	42230000	42235000	RP11-399E6.2'	'TRAK1'	protein_coding	106936	3	42220000	42225000		'TRAK1'	protein_coding	10000	15	9.98372
106939	3	42235000	42240000	AL451006.1'	'TRAK1'	protein_coding	106936	3	42220000	42225000		'TRAK1'	protein_coding	15000	7	5.07175
107002	3	42550000	42555000	FOXJ3'	'VIPR1';'VIPR1-AS1'	noncoding_antisense;protein_coding	106999	3	42535000	42540000		'VIPR1'	protein_coding	15000	12	10.3397
107003	3	42555000	42560000	FOXJ3'	'VIPR1';'VIPR1-AS1'	noncoding_antisense;protein_coding	106999	3	42535000	42540000		'VIPR1'	protein_coding	20000	6	5.16824
10710	1	53545000	53550000	ST3GAL3'	'PODN';'RP11-334A14.5';'SLC1A7'	noncoding_antisense;protein_coding	10715	1	53570000	53575000		'SLC1A7'	protein_coding	25000	5	4.9705
10716	1	53575000	53580000	RP4-675G8.2'	'SLC1A7'	protein_coding	10715	1	53570000	53575000		'SLC1A7'	protein_coding	5000	29	9.88712
107392	3	44500000	44505000	NASP'	'ZNF445'	protein_coding	107402	3	44550000	44555000	ZNF852'	'CATG00000059933.1';'CATG00000059935.1';'ZNF852'	noncoding_lncRNA_divergent;protein_coding	50000	5	5.27262
10740	1	53695000	53700000	RPS15AP10'	'MAGOH'	protein_coding	10741	1	53700000	53705000	MAGOH';RP5-1024G6.5'	'MAGOH';'RP5-1024G6.5'	noncoding_lncRNA_divergent;protein_coding	5000	25	7.54565
107469	3	44885000	44890000	MOB3C'	'KIF15'	protein_coding	107493	3	45005000	45010000		'ZDHHC3'	protein_coding	120000	5	5.20221
107488	3	44980000	44985000	FLJ00388';RP11-543D5.2'	'ZDHHC3'	protein_coding	107493	3	45005000	45010000		'ZDHHC3'	protein_coding	25000	8	7.73721
107492	3	45000000	45005000	RP11-193P11.3'	'ZDHHC3'	protein_coding	107493	3	45005000	45010000		'ZDHHC3'	protein_coding	5000	24	6.09562
107527	3	45175000	45180000	FAF1'	'CDCP1'	protein_coding	107513	3	45105000	45110000		'CATG00000059950.1';'CATG00000064461.1'	noncoding_lncRNA_intergenic	70000	5	5.17743
107527	3	45175000	45180000	CDKN2C'	'CDCP1'	protein_coding	107529	3	45185000	45190000	CDCP1'	'CATG00000059961.1';'CDCP1'	noncoding_lncRNA_divergent;protein_coding	10000	15	9.90653
10754	1	53765000	53770000	CALR4P'	'LRP8'	protein_coding	10753	1	53760000	53765000		'LRP8'	protein_coding	5000	40	16.5411
107633	3	45705000	45710000	CC2D1B';PLA2G12AP1'	'LIMD1'	protein_coding	107638	3	45730000	45735000	LIMD1-AS1';SACM1L'	'LIMD1-AS1';'SACM1L'	noncoding_lncRNA_divergent;protein_coding	25000	5	4.63264
107648	3	45780000	45785000	ORC1';PRPF38A'	'RN7SL145P';'SACM1L'	noncoding_misc_RNA;protein_coding	107654	3	45810000	45815000	SLC6A20'	'SLC6A20'	protein_coding	30000	6	5.60564
10777	1	53880000	53885000	MROH7';MROH7-TTC4'	'SLC25A3P1'	noncoding_pseudogene	10778	1	53885000	53890000		'SLC25A3P1'	noncoding_pseudogene	5000	19	5.52844
10781	1	53900000	53905000	AC119674.1'	'DMRTB1';'SLC25A3P1'	noncoding_pseudogene;protein_coding	10780	1	53895000	53900000		'DMRTB1';'SLC25A3P1'	noncoding_pseudogene;protein_coding	5000	25	7.52359
107811	3	46595000	46600000	AC119674.1'	'CATG00000060012.1';'LRRC2';'LUZPP1'	noncoding_lncRNA_noncoding_antisense;protein_coding	107812	3	46600000	46605000		'CATG00000060012.1';'LRRC2';'LUZPP1'	noncoding_lncRNA_noncoding_antisense;protein_coding	5000	46	17.0247
107975	3	47415000	47420000	MIR4711'	'RP11-708J19.1'	noncoding_lncRNA_divergent	107976	3	47420000	47425000	PTPN23';RP11-708J19.1'	'PTPN23';'RP11-708J19.1'	noncoding_lncRNA_divergent;protein_coding	5000	25	7.36282
107988	3	47480000	47485000	HOOK1'	'SCAP'	protein_coding	107987	3	47475000	47480000		'SCAP'	protein_coding	5000	21	5.74344
107993	3	47505000	47510000	RN7SL475P'	'SCAP';'snoU13'	noncoding_snoRNA;protein_coding	107995	3	47515000	47520000	SCAP'	'CATG00000060027.1';'SCAP'	noncoding_lncRNA_divergent;protein_coding	10000	26	21.0296
108211	3	48595000	48600000	INADL'	'CATG00000060059.1';'PFKFB4';'UCN2'	noncoding_lncRNA_noncoding_antisense;protein_coding	108226	3	48670000	48675000	SLC26A6'	'CATG00000060064.1';'CELSR3';'SLC26A6'	noncoding_lncRNA_divergent;protein_coding	75000	6	6.9415
108219	3	48635000	48640000	LAMTOR5P1'	'UQCRC1'	protein_coding	108226	3	48670000	48675000	SLC26A6'	'CATG00000060064.1';'CELSR3';'SLC26A6'	noncoding_lncRNA_divergent;protein_coding	35000	5	4.91958
108225	3	48665000	48670000	RN7SL180P'	'SLC26A6'	protein_coding	108226	3	48670000	48675000	SLC26A6'	'CATG00000060064.1';'CELSR3';'SLC26A6'	noncoding_lncRNA_divergent;protein_coding	5000	63	27.0956
108226	3	48670000	48675000	PIGPP2'	'CATG00000060064.1';'CELSR3';'SLC26A6'	noncoding_lncRNA_divergent;protein_coding	108232	3	48700000	48705000	RP11-148G20.1'	'CELSR3';'NCKIPSD';'RP11-148G20.1'	noncoding_lncRNA_divergent;protein_coding	30000	6	5.83121
108226	3	48670000	48675000	RNU6-371P'	'CATG00000060064.1';'CELSR3';'SLC26A6'	noncoding_lncRNA_divergent;protein_coding	108242	3	48750000	48755000	IP6K2'	'IP6K2'	protein_coding	80000	5	5.35443
108232	3	48700000	48705000	DOCK7'	'CELSR3';'NCKIPSD';'RP11-148G20.1'	noncoding_lncRNA_divergent;protein_coding	108242	3	48750000	48755000	IP6K2'	'IP6K2'	protein_coding	50000	5	5.32752
108325	3	49165000	49170000	ITGB3BP';PGM1'	'LAMB2'	protein_coding	108326	3	49170000	49175000	LAMB2'	'CATG00000060074.1';'LAMB2'	protein_coding	5000	28	8.94817
108331	3	49195000	49200000	PGM1'	'CCDC71';'RP11-694I15.7'	noncoding_pseudogene;protein_coding	108332	3	49200000	49205000	CCDC71'	'CCDC71';'KLHDC8B'	protein_coding	5000	53	22.9348
108344	3	49260000	49265000	ROR1'	'CCDC36'	protein_coding	108343	3	49255000	49260000		'CCDC36'	protein_coding	5000	45	18.5236
108353	3	49305000	49310000	RNU7-62P'	'C3orf62';'CCDC36';'Y_RNA'	noncoding_misc_RNA;protein_coding	108354	3	49310000	49315000	C3orf62';MIR4271'	'C3orf62';'MIR4271';'USP4'	noncoding_miRNA;protein_coding	5000	30	9.268
108427	3	49675000	49680000	SLC2A3P2'	'BSN';'BSN-AS1'	noncoding_antisense;protein_coding	108433	3	49705000	49710000		'BSN';'CATG00000064602.1'	protein_coding	30000	7	7.14865
108437	3	49725000	49730000	DNAJC6'	'APEH';'MST1';'RNF123'	protein_coding	108444	3	49760000	49765000	AMIGO3';GMPPB';IP6K1'	'AMIGO3';'CATG00000060103.1';'GMPPB';'IP6K1';'RNF123'	noncoding_lncRNA_divergent;protein_coding	35000	6	6.09547
108441	3	49745000	49750000	DNAJC6'	'RNF123'	protein_coding	108444	3	49760000	49765000	AMIGO3';GMPPB';IP6K1'	'AMIGO3';'CATG00000060103.1';'GMPPB';'IP6K1';'RNF123'	noncoding_lncRNA_divergent;protein_coding	15000	7	5.19264
108568	3	50380000	50385000	IL23R'	'CYB561D2';'NPRL2';'XXcos-LUCA11.5';'ZMYND10';'ZMYND10-AS1'	noncoding_lncRNA_divergent;protein_coding	108569	3	50385000	50390000	CYB561D2';NPRL2';XXcos-LUCA11.5'	'CYB561D2';'NPRL2';'XXcos-LUCA11.5';'ZMYND10-AS1'	noncoding_lncRNA_divergent;protein_coding	5000	32	11.52
108620	3	50640000	50645000	RP4-763G1.2'	'CISH'	protein_coding	108621	3	50645000	50650000	CISH';MAPKAPK3'	'CISH';'MAPKAPK3'	protein_coding	5000	23	6.01527
108621	3	50645000	50650000	RP4-763G1.2'	'CISH';'MAPKAPK3'	protein_coding	108622	3	50650000	50655000	CISH';MAPKAPK3'	'CATG00000064633.1';'MAPKAPK3'	noncoding_lncRNA_divergent;protein_coding	5000	40	13.9708
10872	1	54355000	54360000	WLS'	'DIO1';'YIPF1'	protein_coding	10874	1	54365000	54370000		'DIO1';'HSPB11'	protein_coding	10000	16	11.1735
108886	3	51970000	51975000	LRRC7'	'RRP9'	protein_coding	108887	3	51975000	51980000	PARP3';RRP9'	'PARP3';'RRP9'	protein_coding	5000	24	7.46225
108941	3	52245000	52250000	SRSF11'	'ALAS1'	protein_coding	108947	3	52275000	52280000	PPM1M'	'PPM1M';'RP5-1157M23.2';'TWF2'	noncoding_lncRNA_divergent;protein_coding	30000	5	4.93855
108952	3	52300000	52305000	ANKRD13C';HHLA3'	'MIRLET7G';'WDR82'	noncoding_small_RNA;protein_coding	108954	3	52310000	52315000	WDR82'	'GLYCTK';'WDR82'	protein_coding	10000	10	5.86077
108988	3	52480000	52485000	ANKRD13C';HHLA3';RP11-180O5.2'	'TNNC1'	protein_coding	108989	3	52485000	52490000	NISCH';TNNC1'	'NISCH';'TNNC1'	protein_coding	5000	24	6.84836
109004	3	52560000	52565000	ZRANB2-AS2'	'NT5DC2';'STAB1'	protein_coding	109005	3	52565000	52570000	NT5DC2';SMIM4'	'NT5DC2';'PBRM1';'SMIM4'	protein_coding	5000	19	4.84559
109066	3	52870000	52875000	RP4-650F12.2'	'CATG00000060192.1';'MUSTN1';'SFMBT1';'TMEM110';'TMEM110-MUSTN1'	noncoding_lncRNA_divergent;protein_coding	109073	3	52905000	52910000		'SFMBT1';'TMEM110';'TMEM110-MUSTN1'	protein_coding	35000	5	4.93753
109122	3	53150000	53155000	C1orf173'	'RFT1'	protein_coding	109128	3	53180000	53185000		'PRKCD'	protein_coding	30000	6	5.79992
109129	3	53185000	53190000	C1orf173'	'CATG00000064662.1';'PRKCD'	noncoding_lncRNA_divergent;protein_coding	109128	3	53180000	53185000		'PRKCD'	protein_coding	5000	82	36.7368
109129	3	53185000	53190000	TYW3'	'CATG00000064662.1';'PRKCD'	noncoding_lncRNA_divergent;protein_coding	109131	3	53195000	53200000	PRKCD'	'PRKCD'	protein_coding	10000	11	6.29474
109131	3	53195000	53200000	LHX8'	'PRKCD'	protein_coding	109132	3	53200000	53205000	PRKCD'	'PRKCD'	protein_coding	5000	25	6.7808
109132	3	53200000	53205000	RNU6-622P'	'PRKCD'	protein_coding	109128	3	53180000	53185000		'PRKCD'	protein_coding	20000	6	4.90472
109155	3	53315000	53320000	MSH4';RABGGTB'	'CATG00000060207.1';'DCP1A';'snoU13'	noncoding_lncRNA_noncoding_antisense;noncoding_snoRNA;protein_coding	109152	3	53300000	53305000		'CATG00000060207.1';'CATG00000060208.1';'CATG00000064681.1'	noncoding_lncRNA_intergenic;noncoding_lncRNA_noncoding_antisense;noncoding_lncRNA_noncoding_sense_intronic	15000	7	5.1244
109274	3	53910000	53915000	FAM73A';RNA5SP21';RP4-706L14.2'	'ACTR8'	protein_coding	109275	3	53915000	53920000	AC012467.1';ACTR8'	'AC012467.1';'ACTR8';'SELK'	noncoding_small_RNA;protein_coding	5000	58	26.2181
109275	3	53915000	53920000	RP11-181C21.4'	'AC012467.1';'ACTR8';'SELK'	noncoding_small_RNA;protein_coding	109277	3	53925000	53930000	SELK'	'CATG00000060216.1';'SELK'	noncoding_lncRNA_divergent;protein_coding	10000	10	5.68976
109824	3	56660000	56665000	SSX2IP'	'CCDC66';'FAM208A'	protein_coding	109823	3	56655000	56660000		'CCDC66';'FAM208A'	protein_coding	5000	23	6.51751
109881	3	56945000	56950000	MIR4423'	'ARHGEF3';'CATG00000064733.1'	noncoding_sense_overlap_RNA;protein_coding	109883	3	56955000	56960000		'ARHGEF3'	protein_coding	10000	11	6.61526
109996	3	57520000	57525000	RP4-604K5.3'	'DNAH12';'RNU6-108P'	noncoding_snRNA;protein_coding	110000	3	57540000	57545000	PDE12'	'CATG00000064744.1';'PDE12'	noncoding_lncRNA_divergent;protein_coding	20000	6	4.9145
109999	3	57535000	57540000	LINC01140'	'CATG00000064744.1'	noncoding_lncRNA_divergent	110000	3	57540000	57545000	PDE12'	'CATG00000064744.1';'PDE12'	noncoding_lncRNA_divergent;protein_coding	5000	21	5.07873
110029	3	57685000	57690000	LMO4'	'RP11-755B10.3';'Y_RNA'	noncoding_lncRNA_divergent;noncoding_misc_RNA	110030	3	57690000	57695000		'RP11-755B10.3'	noncoding_lncRNA_divergent	5000	65	28.5596
110119	3	58135000	58140000	GBP1'	'FLNB'	protein_coding	110121	3	58145000	58150000	FLNB-AS1'	'FLNB';'FLNB-AS1'	noncoding_lncRNA_noncoding_antisense;protein_coding	10000	13	7.94331
110174	3	58410000	58415000	RP5-943J3.1'	'PDHB';'PXK';'RP11-802O23.3'	noncoding_antisense;protein_coding	110175	3	58415000	58420000	PDHB'	'CATG00000060290.1';'KCTD6';'PDHB'	noncoding_lncRNA_divergent;protein_coding	5000	60	27.2741
11052	1	55255000	55260000	SNORA51'	'RP11-67L3.2';'TTC22'	noncoding_antisense;protein_coding	11053	1	55260000	55265000		'RP11-67L3.2';'TTC22'	noncoding_antisense;protein_coding	5000	21	5.79755
111292	3	64000000	64005000	ARHGAP29'	'PSMD6';'RP11-245J9.4'	noncoding_lncRNA_noncoding_antisense;protein_coding	111293	3	64005000	64010000	PSMD6';RP11-245J9.6'	'CATG00000060377.1';'PSMD6';'RP11-245J9.6'	noncoding_antisense;noncoding_lncRNA_intergenic;protein_coding	5000	21	6.77121
111333	3	64205000	64210000	ARHGAP29'	'PRICKLE2'	protein_coding	111331	3	64195000	64200000		'PRICKLE2'	protein_coding	10000	9	5.15296
111801	3	66545000	66550000	RP11-465K1.2'	'LRIG1'	protein_coding	111800	3	66540000	66545000		'CATG00000064965.1';'LRIG1'	noncoding_lncRNA_noncoding_sense_intronic;protein_coding	5000	24	7.51898
112712	3	71100000	71105000	RP4-581O6.1'	'FOXP1'	protein_coding	112711	3	71095000	71100000		'FOXP1'	protein_coding	5000	38	14.2031
112990	3	72490000	72495000	FAM102B'	'RYBP'	protein_coding	112991	3	72495000	72500000	RYBP'	'CATG00000060552.1';'RYBP'	noncoding_lncRNA_divergent;protein_coding	5000	20	4.82442
113212	3	73600000	73605000	AMIGO1'	'CATG00000060577.1';'PDZRN3'	noncoding_lncRNA_noncoding_antisense;protein_coding	113211	3	73595000	73600000		'CATG00000060577.1';'PDZRN3'	noncoding_lncRNA_noncoding_antisense;protein_coding	5000	47	20.1521
11396	1	56975000	56980000	CYMP'	'CATG00000002118.1';'PPAP2B'	protein_coding;uncertain_coding	11395	1	56970000	56975000		'PPAP2B'	protein_coding	5000	30	9.97131
115966	3	87370000	87375000	DDX20';FAM212B'	'KRT8P25'	noncoding_pseudogene	115965	3	87365000	87370000				5000	76	34.945
116050	3	87790000	87795000	KCND3'	'RNU6-873P';'RP11-451B8.1'	noncoding_lncRNA_intergenic;noncoding_snRNA	116048	3	87780000	87785000		'RP11-451B8.1'	noncoding_lncRNA_intergenic	10000	15	10.0489
118231	3	98695000	98700000	VTCN1'	'CATG00000065342.1';'CTD-2021J15.1';'LINC00973'	noncoding_lncRNA_intergenic;noncoding_lncRNA_noncoding_sense_intronic	118230	3	98690000	98695000		'CATG00000065342.1';'CTD-2021J15.1';'LINC00973'	noncoding_lncRNA_intergenic;noncoding_lncRNA_noncoding_sense_intronic	5000	134	36.7368
118301	3	99045000	99050000	RP4-630J13.1'	'CATG00000065344.1';'RP11-121C1.1'	noncoding_lncRNA_intergenic;noncoding_pseudogene	118285	3	98965000	98970000		'CATG00000061063.1'	noncoding_lncRNA_intergenic	80000	5	5.38545
118405	3	99565000	99570000	PHGDH'	'CMSS1';'FILIP1L'	protein_coding	118416	3	99620000	99625000		'CMSS1';'FILIP1L'	protein_coding	55000	5	5.16792
118487	3	99975000	99980000	SNX18P15'	'CATG00000065366.1';'TBC1D23'	noncoding_lncRNA_divergent;protein_coding	118488	3	99980000	99985000	TBC1D23'	'CATG00000065366.1';'TBC1D23'	noncoding_lncRNA_divergent;protein_coding	5000	27	8.18607
11856	1	59275000	59280000	RP11-640M9.2'	'RP11-63G10.3';'RP4-794H19.2'	noncoding_lncRNA_divergent;noncoding_lncRNA_lincRNA	11857	1	59280000	59285000		'RP4-794H19.2'	noncoding_lncRNA_divergent	5000	23	7.39432
11864	1	59315000	59320000	PDE4DIP'	'CATG00000002449.1';'RP11-63G10.2';'RP4-794H19.1';'RP4-794H19.2'	noncoding_lncRNA_divergent;noncoding_lncRNA_intergenic;noncoding_lncRNA_lincRNA;noncoding_sense_overlap_RNA	11863	1	59310000	59315000		'RP11-63G10.2';'RP4-794H19.1';'RP4-794H19.2'	noncoding_lncRNA_divergent;noncoding_lncRNA_intergenic;noncoding_lncRNA_lincRNA	5000	60	30.8962
118772	3	101400000	101405000	RNU2-38P'	'RPL24';'ZBTB11-AS1'	noncoding_lncRNA_divergent;protein_coding	118773	3	101405000	101410000	RPL24'	'RPL24';'ZBTB11-AS1'	noncoding_lncRNA_divergent;protein_coding	5000	30	9.05901
118800	3	101540000	101545000	PDE4DIP'	'CATG00000065396.1';'NXPE3';'RP11-49I4.3'	noncoding_antisense;noncoding_lncRNA_noncoding_antisense;protein_coding	118801	3	101545000	101550000	NFKBIZ'	'CATG00000065396.1';'NFKBIZ';'NXPE3'	noncoding_lncRNA_noncoding_antisense;protein_coding	5000	42	14.1884
118855	3	101815000	101820000	SEC22B'			118858	3	101830000	101835000				15000	7	5.05516
11905	1	59520000	59525000	LIX1L'	'RP11-145M4.1';'RP11-145M4.2';'RP11-145M4.3';'RP4-794H19.4'	noncoding_lncRNA_intergenic;noncoding_lncRNA_lincRNA	11904	1	59515000	59520000		'RP11-145M4.2';'RP11-145M4.3';'RP4-794H19.4'	noncoding_lncRNA_intergenic	5000	30	10.0513
11952	1	59755000	59760000	RP11-315I20.3'	'CATG00000002496.1';'RP11-467C18.1'	noncoding_lncRNA_divergent;noncoding_lncRNA_intergenic	11953	1	59760000	59765000	FGGY'	'FGGY';'RP11-467C18.1'	noncoding_lncRNA_divergent;protein_coding	5000	28	9.21137
11956	1	59775000	59780000	CD160'	'FGGY'	protein_coding	11991	1	59950000	59955000		'FGGY'	protein_coding	175000	5	5.26465
119701	3	106045000	106050000	PDZK1'	'RP11-93B21.1'	noncoding_pseudogene	119702	3	106050000	106055000				5000	77	36.7368
119738	3	106230000	106235000	HYDIN2'	'Y_RNA'	noncoding_misc_RNA	119739	3	106235000	106240000	Y_RNA'			5000	66	30.0969
119909	3	107085000	107090000	RP11-433J22.3'	'RP11-446H18.5'	noncoding_lncRNA_intergenic	119910	3	107090000	107095000		'RP11-446H18.5'	noncoding_lncRNA_intergenic	5000	58	24.1509
120061	3	107845000	107850000	RP5-998N21.3'	'CATG00000065552.1';'RP11-861A13.4'	noncoding_lncRNA_intergenic	120062	3	107850000	107855000		'CATG00000065552.1';'RP11-861A13.4'	noncoding_lncRNA_intergenic	5000	57	24.6793
120094	3	108010000	108015000	SV2A'	'HHLA2'	protein_coding	120095	3	108015000	108020000	HHLA2'	'HHLA2'	protein_coding	5000	91	36.7368
120262	3	108850000	108855000	MCL1'			120260	3	108840000	108845000				10000	13	8.47711
12040	1	60195000	60200000	SETDB1'	'FGGY';'MIR4711'	noncoding_miRNA;protein_coding	12041	1	60200000	60205000		'FGGY'	protein_coding	5000	51	19.9065
120650	3	110790000	110795000	POGZ'	'PVRL3';'PVRL3-AS1'	noncoding_lncRNA_intergenic;protein_coding	120770	3	111390000	111395000	PLCXD2'	'PHLDB2';'PLCXD2'	protein_coding	600000	5	5.68837
120770	3	111390000	111395000	CELF3'	'PHLDB2';'PLCXD2'	protein_coding	120771	3	111395000	111400000	PLCXD2-AS1'	'PHLDB2';'PLCXD2';'PLCXD2-AS1'	noncoding_lncRNA_noncoding_antisense;protein_coding	5000	31	9.39744
120964	3	112360000	112365000	LCE2A'	'CATG00000061357.1';'CCDC80'	noncoding_lncRNA_divergent;protein_coding	120965	3	112365000	112370000	CCDC80'	'CCDC80'	protein_coding	5000	87	36.7368
121043	3	112755000	112760000	SNORA31'	'RP11-572M11.4'	noncoding_lncRNA_divergent	121042	3	112750000	112755000		'RP11-572M11.4'	noncoding_lncRNA_divergent	5000	41	15.1267
121054	3	112810000	112815000	PRR9'	'AC078785.1';'RP11-572M11.4'	noncoding_lncRNA_divergent;noncoding_miRNA	121055	3	112815000	112820000		'CATG00000065640.1';'RP11-572M11.4'	noncoding_lncRNA_divergent;noncoding_lncRNA_intergenic	5000	31	9.17112
121326	3	114170000	114175000	ADAR'	'RP11-197K3.1';'ZBTB20'	noncoding_lncRNA_lincRNA;protein_coding	121327	3	114175000	114180000		'RP11-197K3.1';'ZBTB20'	noncoding_lncRNA_lincRNA;protein_coding	5000	21	5.16816
121378	3	114430000	114435000	ADAR'	'ZBTB20'	protein_coding	121379	3	114435000	114440000		'ZBTB20'	protein_coding	5000	52	21.2948
122282	3	118950000	118955000	ASH1L';MIR555'	'B4GALT4';'B4GALT4-AS1'	noncoding_lncRNA_intergenic;protein_coding	122283	3	118955000	118960000	B4GALT4'	'B4GALT4';'B4GALT4-AS1';'CATG00000061501.1'	noncoding_lncRNA_divergent;noncoding_lncRNA_intergenic;protein_coding	5000	31	10.1967
122839	3	121735000	121740000	RP11-66D17.3'	'CATG00000061554.1';'ILDR1'	noncoding_lncRNA_intergenic;protein_coding	122838	3	121730000	121735000		'CATG00000061554.1';'ILDR1'	noncoding_lncRNA_intergenic;protein_coding	5000	29	10.4811
122951	3	122295000	122300000	ARHGEF11'	'CATG00000065946.1';'PARP15'	noncoding_lncRNA_divergent;protein_coding	122950	3	122290000	122295000		'DTX3L'	protein_coding	5000	44	17.3352
12304	1	61515000	61520000	ETV3L'	'CATG00000060177.1';'NFIA';'RP11-436K8.1';'RP4-668G5.1'	noncoding_lncRNA_divergent;noncoding_lncRNA_intergenic;noncoding_lncRNA_noncoding_antisense;protein_coding	12305	1	61520000	61525000	NFIA'	'NFIA';'RP11-436K8.1';'RP4-668G5.1'	noncoding_lncRNA_intergenic;noncoding_lncRNA_noncoding_antisense;protein_coding	5000	20	4.94692
12319	1	61590000	61595000	KIRREL-IT1'	'CATG00000002663.1';'NFIA';'RP4-802A10.1'	noncoding_lncRNA_noncoding_sense_intronic;noncoding_sense_intronic;protein_coding	12320	1	61595000	61600000		'CATG00000002663.1';'NFIA'	noncoding_lncRNA_noncoding_sense_intronic;protein_coding	5000	60	25.6192
123195	3	123515000	123520000	KIRREL-IT1'	'MYLK'	protein_coding	123199	3	123535000	123540000		'MYLK'	protein_coding	20000	6	4.99118
123408	3	124580000	124585000	OR6N1'	'ENO1P3';'ITGB5'	noncoding_pseudogene;protein_coding	123393	3	124505000	124510000		'ITGB5';'ITGB5-AS1'	noncoding_antisense;protein_coding	75000	5	5.67189
123421	3	124645000	124650000	MNDA'	'MUC13'	protein_coding	123422	3	124650000	124655000	MUC13'	'MUC13'	protein_coding	5000	20	6.02143
123826	3	126670000	126675000	OR10J6P'	'CHCHD6'	protein_coding	123827	3	126675000	126680000	CHCHD6'	'CHCHD6'	protein_coding	5000	29	9.6267
123982	3	127450000	127455000	FCRL6'	'MGLL'	protein_coding	123983	3	127455000	127460000	MGLL'	'MGLL'	protein_coding	5000	25	7.66207
123983	3	127455000	127460000	FCRL6'	'MGLL'	protein_coding	123985	3	127465000	127470000		'CATG00000061700.1';'MGLL'	noncoding_lncRNA_noncoding_antisense;protein_coding	10000	9	5.12978
123993	3	127505000	127510000	FCRL6'	'MGLL'	protein_coding	123985	3	127465000	127470000		'CATG00000061700.1';'MGLL'	noncoding_lncRNA_noncoding_antisense;protein_coding	40000	6	6.63161
124049	3	127785000	127790000	SLAMF8'	'RUVBL1';'SEC61A1'	protein_coding	124052	3	127800000	127805000	RUVBL1'	'RUVBL1'	protein_coding	15000	7	5.40374
124051	3	127795000	127800000	CCDC19'	'RUVBL1';'RUVBL1-AS1'	noncoding_lncRNA_noncoding_antisense;protein_coding	124052	3	127800000	127805000	RUVBL1'	'RUVBL1'	protein_coding	5000	22	6.03277
124108	3	128080000	128085000	IGSF9'	'EEFSEC';'MIR1280'	noncoding_miRNA;protein_coding	124109	3	128085000	128090000		'EEFSEC'	protein_coding	5000	25	7.65216
124194	3	128510000	128515000	KCNJ9'	'RAB7A'	protein_coding	124193	3	128505000	128510000		'RAB7A'	protein_coding	5000	76	36.7368
124210	3	128590000	128595000	ATP1A4'	'CATG00000066059.1';'RP11-723O4.2'	noncoding_antisense;uncertain_coding	124211	3	128595000	128600000	ACAD9'	'ACAD9';'CATG00000066059.1'	protein_coding;uncertain_coding	5000	34	12.6246
124707	3	131075000	131080000	SLAMF7'	'RP11-933H2.4'	noncoding_lncRNA_divergent	124708	3	131080000	131085000	NUDT16P1';RP11-933H2.4'	'NUDT16P';'RP11-933H2.4'	noncoding_lncRNA_divergent;noncoding_pseudogene	5000	20	5.29282
124916	3	132120000	132125000	DEDD'	'DNAJC13';'NIP7P2'	noncoding_pseudogene;protein_coding	124886	3	131970000	131975000		'CPNE4';'RP11-250B16.1'	noncoding_pseudogene;protein_coding	150000	5	5.71875
125167	3	133375000	133380000	B4GALT3';PPOX'	'TOPBP1'	protein_coding	125168	3	133380000	133385000	RNU6-678P';TFP1';TOPBP1'	'RNU6-678P';'TFP1';'TOPBP1'	noncoding_pseudogene;noncoding_snRNA;protein_coding	5000	24	8.38068
1252	1	6255000	6260000	MIR5187';NR1I3';TOMM40L'	'RPL22'	protein_coding	1253	1	6260000	6265000	RNF207';RP1-120G22.11';RPL22'	'RP1-120G22.11';'RPL22'	noncoding_lncRNA_divergent;protein_coding	5000	45	18.5719
1252	1	6255000	6260000	NR1I3'	'RPL22'	protein_coding	1260	1	6295000	6300000	ICMT';LINC00337'	'ICMT';'LINC00337'	noncoding_lncRNA_divergent;protein_coding	40000	5	5.05785
125305	3	134065000	134070000	MPZ'	'AMOTL2';'RP11-375I20.6';'RPL39P5'	noncoding_lncRNA_lincRNA;noncoding_pseudogene;protein_coding	125306	3	134070000	134075000	RPL39P5'	'AMOTL2';'RPL39P5'	noncoding_pseudogene;protein_coding	5000	24	7.36016
12531	1	62650000	62655000	MPZ';SDHC'	'PIGPP2'	noncoding_pseudogene	12530	1	62645000	62650000				5000	48	18.8247
125627	3	135675000	135680000	RP11-5K23.5'	'MSL2';'RP11-305O4.1'	noncoding_pseudogene;protein_coding	125628	3	135680000	135685000	PPP2R3A'	'MSL2';'PPP2R3A'	protein_coding	5000	36	14.7135
125824	3	136660000	136665000	NOS1AP'	'NCK1'	protein_coding	125826	3	136670000	136675000		'IL20RB';'NCK1'	protein_coding	10000	8	4.69845
1259	1	6290000	6295000	C1orf111';C1orf226'	'ICMT'	protein_coding	1260	1	6295000	6300000	ICMT';LINC00337'	'ICMT';'LINC00337'	noncoding_lncRNA_divergent;protein_coding	5000	25	6.54824
1260	1	6295000	6300000	C1orf110'	'ICMT';'LINC00337'	noncoding_lncRNA_divergent;protein_coding	1290	1	6445000	6450000	ACOT7'	'ACOT7';'CATG00000045030.1'	noncoding_lncRNA_noncoding_sense_intronic;protein_coding	150000	5	5.28454
126623	3	140655000	140660000	RXRG'	'CATG00000066304.1'	noncoding_lncRNA_divergent	126624	3	140660000	140665000	SLC25A36'	'CATG00000066304.1';'SLC25A36'	noncoding_lncRNA_divergent;protein_coding	5000	20	5.36067
126624	3	140660000	140665000	RXRG'	'CATG00000066304.1';'SLC25A36'	noncoding_lncRNA_divergent;protein_coding	126625	3	140665000	140670000		'SLC25A36'	protein_coding	5000	31	11.3684
126709	3	141085000	141090000	AL626787.1'	'CATG00000066312.1';'RP11-438D8.2';'ZBTB38'	noncoding_lncRNA_divergent;protein_coding	126726	3	141170000	141175000		'CATG00000066318.1';'ZBTB38'	noncoding_lncRNA_intergenic;protein_coding	85000	5	5.69429
127738	3	146230000	146235000	SELL'	'PLSCR1'	protein_coding	127737	3	146225000	146230000		'PLSCR1'	protein_coding	5000	54	22.0165
127750	3	146290000	146295000	KIFAP3'	'PLSCR5'	protein_coding	127737	3	146225000	146230000		'PLSCR1'	protein_coding	65000	6	6.43709
12825	1	64120000	64125000	PIGC'	'PGM1';'RN7SL130P'	noncoding_misc_RNA;protein_coding	12826	1	64125000	64130000		'CATG00000003036.1';'CATG00000060979.1';'PGM1'	noncoding_lncRNA_intergenic;protein_coding	5000	64	28.78
128306	3	149070000	149075000	PIGC'	'RP11-206M11.7';'RP11-2G17.1'	noncoding_lncRNA_intergenic;noncoding_pseudogene	128308	3	149080000	149085000		'RP11-206M11.7'	noncoding_lncRNA_intergenic	10000	13	8.02115
128311	3	149095000	149100000	C1orf105'	'TM4SF1';'TM4SF1-AS1'	noncoding_lncRNA_intergenic;protein_coding	128312	3	149100000	149105000	RP11-278L15.2'	'RP11-278L15.2';'TM4SF1-AS1'	noncoding_lncRNA_intergenic	5000	32	11.4045
128330	3	149190000	149195000	C1orf105'	'TM4SF4'	protein_coding	128331	3	149195000	149200000		'TM4SF4'	protein_coding	5000	26	7.01275
128431	3	149695000	149700000	SUCO'	'AC117395.1';'PFN2';'RNF13';'RP11-651P23.4';'RP11-651P23.5'	noncoding_lncRNA_divergent;noncoding_pseudogene;protein_coding	128432	3	149700000	149705000	RP11-651P23.2';RP11-651P23.4'	'PFN2';'RNF13';'RP11-651P23.2';'RP11-651P23.4'	noncoding_pseudogene;protein_coding	5000	26	7.07002
1285	1	6420000	6425000	RP1-15D23.2'	'ACOT7';'CATG00000045030.1'	noncoding_lncRNA_noncoding_sense_intronic;protein_coding	1290	1	6445000	6450000	ACOT7'	'ACOT7';'CATG00000045030.1'	noncoding_lncRNA_noncoding_sense_intronic;protein_coding	25000	7	6.3459
128555	3	150315000	150320000	AIMP1P2'	'EIF2A';'SERP1'	protein_coding	128556	3	150320000	150325000	SELT';SERP1'	'SELT';'SERP1'	protein_coding	5000	22	5.72807
12862	1	64305000	64310000	RP11-296O14.1'	'CATG00000003053.1';'CFL1P3';'ROR1'	noncoding_lncRNA_noncoding_sense_intronic;noncoding_pseudogene;protein_coding	12863	1	64310000	64315000		'ROR1'	protein_coding	5000	27	7.74953
128701	3	151045000	151050000	SLC9C2'	'MED12L';'P2RY13'	protein_coding	128696	3	151020000	151025000		'GPR87';'MED12L'	protein_coding	25000	8	7.85011
1289	1	6440000	6445000	RP11-318C24.2'	'ACOT7';'CATG00000045030.1'	noncoding_lncRNA_noncoding_sense_intronic;protein_coding	1290	1	6445000	6450000	ACOT7'	'ACOT7';'CATG00000045030.1'	noncoding_lncRNA_noncoding_sense_intronic;protein_coding	5000	65	29.0562
129429	3	154685000	154690000	LAMC1'	'RP11-439C8.2'	noncoding_lncRNA_intergenic	129430	3	154690000	154695000				5000	36	12.8953
129493	3	155005000	155010000	C1orf21'	'RP11-451G4.2';'RP11-451G4.3'	noncoding_lncRNA_intergenic;noncoding_lncRNA_lincRNA	129492	3	155000000	155005000		'RP11-451G4.2'	noncoding_lncRNA_intergenic	5000	24	6.24056
129497	3	155025000	155030000	TRMT1L'	'PABPC1P10'	noncoding_pseudogene	129496	3	155020000	155025000				5000	21	5.11253
129583	3	155455000	155460000	RP11-463J7.3'	'AC104472.1';'PLCH1'	protein_coding	129584	3	155460000	155465000	AC104472.1';PLCH1'	'AC104472.1';'PLCH1'	protein_coding	5000	26	7.26819
129584	3	155460000	155465000	RP11-463J7.3'	'AC104472.1';'PLCH1'	protein_coding	129585	3	155465000	155470000		'C3orf33'	protein_coding	5000	105	36.7368
129797	3	156525000	156530000	RP11-532L16.3'	'CATG00000062386.1';'CATG00000062391.1';'LINC00886';'PA2G4P4'	noncoding_lncRNA_intergenic;noncoding_lncRNA_noncoding_sense_intronic;noncoding_pseudogene	129798	3	156530000	156535000	LINC00886'	'CATG00000062386.1';'CATG00000062392.1';'LINC00886';'PA2G4P4'	noncoding_lncRNA_intergenic;noncoding_lncRNA_noncoding_sense_intronic;noncoding_pseudogene;uncertain_coding	5000	97	36.7368
129868	3	156880000	156885000	CAMSAP2'	'KRT18P34';'RP11-550I24.2';'RP11-555M1.3'	noncoding_lncRNA_divergent;noncoding_lncRNA_noncoding_antisense;noncoding_pseudogene	129870	3	156890000	156895000	RNA5SP146';RP11-550I24.2'	'RNA5SP146';'RP11-550I24.2';'RP11-555M1.3'	noncoding_lncRNA_divergent;noncoding_lncRNA_noncoding_antisense;structural_RNA	10000	11	6.41861
129934	3	157210000	157215000	MROH3P'	'VEPH1'	protein_coding	129935	3	157215000	157220000	VEPH1'	'VEPH1'	protein_coding	5000	47	18.0426
130056	3	157820000	157825000	KIF21B'	'RSRC1';'SHOX2'	protein_coding	130057	3	157825000	157830000	RSRC1'	'RSRC1';'SHOX2'	protein_coding	5000	25	7.61086
130397	3	159525000	159530000	ASCL5'	'CATG00000066646.1';'IQCJ-SCHIP1';'RNU2-31P';'SCHIP1'	noncoding_lncRNA_noncoding_antisense;noncoding_snRNA;protein_coding	130398	3	159530000	159535000		'CATG00000066646.1';'IQCJ-SCHIP1';'SCHIP1'	noncoding_lncRNA_noncoding_antisense;protein_coding	5000	50	21.056
130399	3	159535000	159540000	TMEM9'	'CATG00000066646.1';'IQCJ-SCHIP1';'SCHIP1'	noncoding_lncRNA_noncoding_antisense;protein_coding	130400	3	159540000	159545000	AC021654.1'	'AC021654.1';'CATG00000066646.1';'IQCJ-SCHIP1';'SCHIP1'	noncoding_lncRNA_noncoding_antisense;noncoding_miRNA;protein_coding	5000	31	11.5815
130570	3	160390000	160395000	PKP1'	'ARL14'	protein_coding	130571	3	160395000	160400000	ARL14'	'ARL14'	protein_coding	5000	64	30.1035
13070	1	65345000	65350000	LAD1'	'JAK1'	protein_coding	13073	1	65360000	65365000		'JAK1'	protein_coding	15000	7	5.05786
13143	1	65710000	65715000	RP11-480I12.5';RP11-480I12.7'	'DNAJC6'	protein_coding	13145	1	65720000	65725000	DNAJC6'	'DNAJC6'	protein_coding	10000	27	21.6957
13177	1	65880000	65885000	PPFIA4'	'DNAJC6';'LEPROT';'RNU2-15P'	noncoding_snRNA;protein_coding	13178	1	65885000	65890000	LEPR';LEPROT'	'CATG00000061237.1';'LEPR';'LEPROT'	noncoding_lncRNA_divergent;protein_coding	5000	59	25.5346
131981	3	167445000	167450000	NPM1P40'	'PDCD10'	protein_coding	131982	3	167450000	167455000	PDCD10';SERPINI1'	'PDCD10';'SERPINI1'	protein_coding	5000	23	6.82466
132443	3	169755000	169760000	PLEKHA6';RP11-739N20.2'	'GPR160'	protein_coding	132444	3	169760000	169765000		'GPR160'	protein_coding	5000	20	5.15413
132445	3	169765000	169770000	PLEKHA6';RP11-739N20.2'	'GPR160'	protein_coding	132444	3	169760000	169765000		'GPR160'	protein_coding	5000	46	17.6197
132523	3	170155000	170160000	PIK3C2B'	'CLDN11'	protein_coding	132521	3	170145000	170150000		'CLDN11'	protein_coding	10000	12	7.5035
132897	3	172025000	172030000	NFASC'	'FNDC3B'	protein_coding	132898	3	172030000	172035000	AC092964.1'	'AC092964.1';'CATG00000066861.1';'FNDC3B'	noncoding_lncRNA_noncoding_antisense;protein_coding	5000	22	5.92009
133958	3	177330000	177335000	RP4-681L3.2';SLC26A9'	'LINC00578'	noncoding_lncRNA_intergenic	133957	3	177325000	177330000		'LINC00578'	noncoding_lncRNA_intergenic	5000	29	9.80714
135263	3	183855000	183860000	CR2'	'EIF2B5';'RP11-778D9.12'	noncoding_lncRNA_divergent;protein_coding	135266	3	183870000	183875000	DVL3'	'DVL3';'EIF2B5';'RP11-778D9.12'	noncoding_lncRNA_divergent;protein_coding	15000	12	11.0095
135266	3	183870000	183875000	RP11-78B10.2'	'DVL3';'EIF2B5';'RP11-778D9.12'	noncoding_lncRNA_divergent;protein_coding	135270	3	183890000	183895000	AP2M1'	'AP2M1';'DVL3';'EIF2B5'	protein_coding	20000	7	6.0778
135270	3	183890000	183895000	C1orf132'	'AP2M1';'DVL3';'EIF2B5'	protein_coding	135272	3	183900000	183905000	ABCF3';AP2M1'	'ABCF3';'AP2M1';'CATG00000067096.1';'EIF2B5'	noncoding_lncRNA_divergent;protein_coding	10000	14	9.23172
135282	3	183950000	183955000	PLXNA2'	'ABCF3';'ALG3';'EIF2B5';'VWA5B2'	protein_coding	135285	3	183965000	183970000	ALG3';ECE2'	'ABCF3';'ALG3';'ECE2';'EIF2B5'	protein_coding	15000	7	5.29799
135298	3	184030000	184035000	PLXNA2'	'ABCF3';'EIF2B5';'EIF4G1'	protein_coding	135299	3	184035000	184040000	EIF4G1'	'ABCF3';'EIF2B5';'EIF4G1'	protein_coding	5000	20	5.34724
135551	3	185295000	185300000	LPGAT1';RP11-552D8.1'			135552	3	185300000	185305000	SENP2'	'CATG00000067114.1';'SENP2'	noncoding_lncRNA_divergent;protein_coding	5000	29	10.0616
135581	3	185445000	185450000	DTL'	'C3orf65';'IGF2BP2'	protein_coding	135582	3	185450000	185455000		'C3orf65';'IGF2BP2'	protein_coding	5000	24	6.85884
135600	3	185540000	185545000	RP11-15I11.3'	'CATG00000063132.1';'IGF2BP2'	noncoding_lncRNA_divergent;protein_coding	135594	3	185510000	185515000		'IGF2BP2'	protein_coding	30000	5	4.88064
135622	3	185650000	185655000	RP11-15I11.3'	'TRA2B'	protein_coding	135623	3	185655000	185660000	TRA2B'	'CATG00000063135.1';'TRA2B'	noncoding_lncRNA_divergent;protein_coding	5000	19	4.61933
135746	3	186270000	186275000	BATF3';RNU6-423P'	'TBCCD1'	protein_coding	135748	3	186280000	186285000	DNAJB11';TBCCD1'	'TBCCD1'	protein_coding	10000	10	5.43028
135751	3	186295000	186300000	BATF3'	'DNAJB11'	protein_coding	135753	3	186305000	186310000		'DNAJB11';'RP11-134F2.2'	noncoding_lncRNA_intergenic;protein_coding	10000	11	6.34386
135752	3	186300000	186305000	C1orf227'	'DNAJB11'	protein_coding	135753	3	186305000	186310000		'DNAJB11';'RP11-134F2.2'	noncoding_lncRNA_intergenic;protein_coding	5000	39	14.4794
135754	3	186310000	186315000	FLVCR1';FLVCR1-AS1'	'DNAJB11';'RP11-134F2.2'	noncoding_lncRNA_intergenic;protein_coding	135753	3	186305000	186310000		'DNAJB11';'RP11-134F2.2'	noncoding_lncRNA_intergenic;protein_coding	5000	29	9.62703
135762	3	186350000	186355000	VASH2'	'FETUB';'RP11-134F2.2'	noncoding_lncRNA_intergenic;protein_coding	135787	3	186475000	186480000	PSMD10P2';RP11-573D15.8'	'PSMD10P2';'RP11-573D15.8'	noncoding_lncRNA_divergent;noncoding_pseudogene	125000	5	5.70263
135768	3	186380000	186385000	RPS6KC1'	'HRG';'RP11-134F2.2'	noncoding_lncRNA_intergenic;protein_coding	135769	3	186385000	186390000	HRG'	'HRG'	protein_coding	5000	41	14.7955
135786	3	186470000	186475000	AL592063.1'	'PSMD10P2';'RP11-573D15.8'	noncoding_lncRNA_divergent;noncoding_pseudogene	135787	3	186475000	186480000	PSMD10P2';RP11-573D15.8'	'PSMD10P2';'RP11-573D15.8'	noncoding_lncRNA_divergent;noncoding_pseudogene	5000	82	36.7368
135791	3	186495000	186500000	PROX1-AS1'	'RP11-573D15.6';'RP11-573D15.9'	noncoding_lncRNA_divergent;noncoding_pseudogene	135792	3	186500000	186505000	EIF4A2';RP11-573D15.9';SNORA4';SNORA63';SNORA81';SNORD2'	'CATG00000067144.1';'EIF4A2';'RP11-573D15.9';'SNORA63';'SNORA81';'SNORD2'	noncoding_lncRNA_divergent;noncoding_small_RNA;protein_coding	5000	22	6.41574
136261	3	188845000	188850000	IARS2';snoU13'	'CATG00000067208.1';'TPRG1'	noncoding_lncRNA_divergent;protein_coding	136262	3	188850000	188855000	TPRG1'	'CATG00000063257.1';'CATG00000067208.1';'TPRG1'	noncoding_lncRNA_divergent;noncoding_lncRNA_noncoding_sense_intronic;protein_coding	5000	46	19.0529
136458	3	189830000	189835000	RP11-302I18.1';XRCC6P3'	'LEPREL1';'RN7SL486P'	noncoding_misc_RNA;protein_coding	136459	3	189835000	189840000	LEPREL1';LEPREL1-AS1'	'LEPREL1';'LEPREL1-AS1'	noncoding_lncRNA_divergent;protein_coding	5000	34	11.4085
136682	3	190950000	190955000	RP11-400N13.2'	'OSTN';'OSTN-AS1';'UTS2B'	noncoding_antisense;protein_coding	136683	3	190955000	190960000		'OSTN';'UTS2B'	protein_coding	5000	20	5.20166
136701	3	191045000	191050000	RP11-400N13.3'	'CCDC50';'UTS2B'	protein_coding	136705	3	191065000	191070000		'CCDC50'	protein_coding	20000	7	6.02281
136707	3	191075000	191080000	QRSL1P2'	'CCDC50'	protein_coding	136706	3	191070000	191075000		'CCDC50'	protein_coding	5000	34	12.4168
137018	3	192630000	192635000	CAPN8'	'MB21D2'	protein_coding	137016	3	192620000	192625000		'MB21D2'	protein_coding	10000	13	8.26319
137018	3	192630000	192635000	CAPN8'	'MB21D2'	protein_coding	137019	3	192635000	192640000	MB21D2'	'CATG00000063381.1';'MB21D2'	noncoding_lncRNA_divergent;protein_coding	5000	23	5.92395
137236	3	193720000	193725000	DNAH14'	'RP11-407B7.1';'RP11-699L21.1';'RP11-699L21.2'	noncoding_lncRNA_intergenic	137225	3	193665000	193670000		'CATG00000063406.1'	noncoding_lncRNA_intergenic	55000	6	6.62812
137236	3	193720000	193725000	DNAH14'	'RP11-407B7.1';'RP11-699L21.1';'RP11-699L21.2'	noncoding_lncRNA_intergenic	137229	3	193685000	193690000		'RP11-699L21.1';'RP11-699L21.2'	noncoding_lncRNA_intergenic	35000	5	4.89537
13725	1	68620000	68625000	EPHX1'	'GNG12-AS1';'WLS'	noncoding_lncRNA_divergent;protein_coding	13729	1	68640000	68645000	WLS'	'GNG12-AS1';'WLS'	noncoding_lncRNA_divergent;protein_coding	20000	6	4.65217
137284	3	193960000	193965000	RP11-396C23.2'	'RP11-513G11.3';'RP11-513G11.4'	noncoding_lncRNA_intergenic;noncoding_lncRNA_lincRNA	137286	3	193970000	193975000		'CATG00000067318.1';'RP11-513G11.3'	noncoding_lncRNA_intergenic	10000	24	18.8395
13729	1	68640000	68645000	RP11-396C23.3'	'GNG12-AS1';'WLS'	noncoding_lncRNA_divergent;protein_coding	13740	1	68695000	68700000	WLS'	'WLS'	protein_coding	55000	8	9.21658
137297	3	194025000	194030000	ACBD3';RP11-275I14.2'	'LINC00887'	noncoding_lncRNA_intergenic	137298	3	194030000	194035000	LINC00887'	'LINC00887'	noncoding_lncRNA_intergenic	5000	42	15.7987
137342	3	194250000	194255000	PARP1'	'RNU6-1101P'	noncoding_snRNA	137343	3	194255000	194260000	RNU6-1101P'			5000	45	19.2311
137348	3	194280000	194285000	PARP1';RP11-118H4.3'	'AC046143.6';'CATG00000063430.1';'TMEM44'	noncoding_lncRNA_intergenic;noncoding_pseudogene;protein_coding	137354	3	194310000	194315000	TMEM44'	'TMEM44';'TMEM44-AS1'	noncoding_lncRNA_intergenic;protein_coding	30000	6	5.70324
137352	3	194300000	194305000	RP11-118H4.1'	'CATG00000063434.1';'TMEM44';'TMEM44-AS1'	noncoding_lncRNA_intergenic;protein_coding	137354	3	194310000	194315000	TMEM44'	'TMEM44';'TMEM44-AS1'	noncoding_lncRNA_intergenic;protein_coding	10000	10	5.59838
137353	3	194305000	194310000	RP11-118H4.1'	'TMEM44';'TMEM44-AS1'	noncoding_lncRNA_intergenic;protein_coding	137354	3	194310000	194315000	TMEM44'	'TMEM44';'TMEM44-AS1'	noncoding_lncRNA_intergenic;protein_coding	5000	104	36.7368
137359	3	194335000	194340000	ITPKB-IT1'	'CATG00000063435.1';'TMEM44'	protein_coding	137302	3	194050000	194055000		'CATG00000063421.1';'CATG00000067320.1'	noncoding_lncRNA_intergenic	285000	5	5.4177
137373	3	194405000	194410000	RPS27P5'	'FAM43A'	protein_coding	137389	3	194485000	194490000	AC090505.4';AC090505.6'	'AC090505.4';'AC090505.6'	noncoding_lncRNA_intergenic	80000	5	5.28133
137373	3	194405000	194410000	PSEN2'	'FAM43A'	protein_coding	137442	3	194750000	194755000				345000	5	5.47413
137560	3	195340000	195345000	RP5-1139B12.2'	'AC069213.1'	noncoding_pseudogene	137581	3	195445000	195450000	MUC20'	'LINC00969';'MUC20'	noncoding_lncRNA_intergenic;protein_coding	105000	5	5.50921
137574	3	195410000	195415000	BTNL10'	'LINC00969';'SDHAP2'	noncoding_lncRNA_intergenic;noncoding_pseudogene	137630	3	195690000	195695000	SDHAP1'	'SDHAP1'	noncoding_pseudogene	280000	5	5.94492
137581	3	195445000	195450000	RHOU'	'LINC00969';'MUC20'	noncoding_lncRNA_intergenic;protein_coding	137580	3	195440000	195445000		'LINC00969';'MUC20'	noncoding_lncRNA_intergenic;protein_coding	5000	59	23.6095
137582	3	195450000	195455000	RP4-799G3.2'	'LINC00969';'MUC20'	noncoding_lncRNA_intergenic;protein_coding	137561	3	195345000	195350000		'AC069213.1'	noncoding_pseudogene	105000	5	6.29335
137604	3	195560000	195565000	RP5-1065P14.2'	'AC124944.5'	noncoding_lncRNA_intergenic	137606	3	195570000	195575000	AC124944.4'	'AC124944.4';'AC124944.5'	noncoding_lncRNA_intergenic;noncoding_pseudogene	10000	14	8.79256
137605	3	195565000	195570000	RP5-1061H20.5'	'AC124944.5'	noncoding_lncRNA_intergenic	137606	3	195570000	195575000	AC124944.4'	'AC124944.4';'AC124944.5'	noncoding_lncRNA_intergenic;noncoding_pseudogene	5000	24	5.92086
137606	3	195570000	195575000	TMEM78'	'AC124944.4';'AC124944.5'	noncoding_lncRNA_intergenic;noncoding_pseudogene	137618	3	195630000	195635000	TNK2';TNK2-AS1'	'CATG00000067380.1';'TNK2';'TNK2-AS1'	noncoding_lncRNA_divergent;noncoding_lncRNA_noncoding_sense_intronic;protein_coding	60000	6	6.35748
137609	3	195585000	195590000	RP4-803J11.2'	'TNK2'	protein_coding	137616	3	195620000	195625000	TNK2'	'TNK2';'TNK2-AS1'	noncoding_lncRNA_divergent;protein_coding	35000	5	5.12248
137609	3	195585000	195590000	RN7SKP276'	'TNK2'	protein_coding	137628	3	195680000	195685000		'RNU2-11P'	noncoding_small_RNA	95000	6	6.58711
137616	3	195620000	195625000	ACTA1'	'TNK2';'TNK2-AS1'	noncoding_lncRNA_divergent;protein_coding	137618	3	195630000	195635000	TNK2';TNK2-AS1'	'CATG00000067380.1';'TNK2';'TNK2-AS1'	noncoding_lncRNA_divergent;noncoding_lncRNA_noncoding_sense_intronic;protein_coding	10000	10	5.88428
137624	3	195660000	195665000	RP11-108F13.2'	'AC024937.6';'RNU2-11P'	noncoding_pseudogene;noncoding_small_RNA	137628	3	195680000	195685000		'RNU2-11P'	noncoding_small_RNA	20000	14	14.4285
137778	3	196430000	196435000	COG2'	'CEP19';'PIGX'	protein_coding	137779	3	196435000	196440000	CEP19';PIGX';RNU6-646P'	'CEP19';'PIGX';'RNU6-646P'	noncoding_snRNA;protein_coding	5000	30	9.47951
137823	3	196655000	196660000	ARV1';TTC13'	'NCBP2';'SENP5'	protein_coding	137825	3	196665000	196670000	NCBP2';NCBP2-AS1';NCBP2-AS2'	'CATG00000063526.1';'NCBP2';'NCBP2-AS1';'NCBP2-AS2'	noncoding_lncRNA_divergent;protein_coding	10000	10	5.51592
137830	3	196690000	196695000	ARV1';TTC13'	'PIGZ'	protein_coding	137831	3	196695000	196700000	PIGZ'	'CATG00000063529.1';'PIGZ'	protein_coding;uncertain_coding	5000	28	7.96248
137841	3	196745000	196750000	RN7SL299P';RP11-284L19.1'	'MFI2'	protein_coding	137939	3	197235000	197240000		'BDH1'	protein_coding	490000	5	5.48584
137981	3	197445000	197450000	PCNXL2'	'CATG00000067436.1';'KIAA0226'	noncoding_lncRNA_noncoding_sense_intronic;protein_coding	137979	3	197435000	197440000		'KIAA0226'	protein_coding	10000	9	5.17524
138353	4	1280000	1285000	RP11-35L17.3'	'CATG00000071578.1';'CTBP1-AS2';'MAEA'	noncoding_lncRNA_divergent;protein_coding	138361	4	1320000	1325000	MAEA'	'MAEA'	protein_coding	40000	5	5.34053
138544	4	2235000	2240000	FMN2'	'COX6B1P5';'HAUS3';'POLN'	noncoding_pseudogene;protein_coding	138545	4	2240000	2245000	HAUS3';POLN'	'HAUS3';'MXD4';'POLN'	protein_coding	5000	57	26.6431
138679	4	2910000	2915000	RFKP1'	'ADD1'	protein_coding	138681	4	2920000	2925000		'ADD1'	protein_coding	10000	8	4.69456
139693	4	7980000	7985000	RSL24D1P4'	'ABLIM2';'CATG00000067666.1'	protein_coding	139689	4	7960000	7965000		'ABLIM2'	protein_coding	20000	7	6.53501
139732	4	8175000	8180000	RSL24D1P4'	'GMPSP1'	noncoding_pseudogene	139730	4	8165000	8170000				10000	11	6.83628
141335	4	16190000	16195000	SMYD3'	'TAPT1'	protein_coding	141336	4	16195000	16200000	TAPT1'	'TAPT1'	protein_coding	5000	58	27.1251
[truncated: 3,401 more rows]

## Sheet: Supplementary Table 4c
Supplementary Table 4c. List of identified enhancer-promoter interactions from Hi-C interactions in PrEC cell line
[truncated: 3,692 more rows]
