# Supplementary material for: An Integrative Analysis of Chromatin Interactions, Gene Expression and Genomic Variants Identifies 30 Likely Regulatory Variants in Prostate Cancer
Source: Preprints.org preprint supplement (doi:10.20944/preprints202301.0343.v1), 2023-01-19
Supplement: Supplementary file 5 [file SupplementaryTable5.xlsx]

## Sheet: SupplementartTable5a
SupplementaryTable5A: List of potential regulatory variants in LNCaP cell line.
Chr	Start	End	ID	Type
10	46046326	46046326	rs10993994	SNP
10	51489224	51489224	rs35716372	SNP
10	51489592	51489592	rs143567661	SNP
10	51489780	51489780	rs28451380	SNP
10	51495110	51495110	rs11004221	SNP
10	51495349	51495349	rs11004246	SNP
10	51495685	51495685	rs79784258	SNP
10	51496623	51496623	rs11004324	SNP
10	51496796	51496796	rs2843562	SNP
10	51497156	51497156	rs34135040	SNP
10	51498019	51498019	rs11004409	SNP
10	51498181	51498181	rs11004415	SNP
10	51498336	51498336	rs11004422	SNP
10	51498493	51498493	rs11004435	SNP
10	51499655	51499655	rs11599333	SNP
10	51500088	51500088	rs11004584	SNP
10	51500301	51500301	rs2611502	SNP
10	51500874	51500874	rs12763717	SNP
10	51501277	51501277	rs66746805	SNP
10	51501304	51501304	rs67289834	SNP
10	51501966	51501966	rs138061577	SNP
10	51502436	51502436	rs56244335	SNP
10	51502552	51502552	rs55848837	SNP
10	51502574	51502574	rs57858801	SNP
10	51502612	51502612	rs57442251	SNP
10	51502802	51502802	rs113082846	SNP
10	51503178	51503178	rs2611475	SNP
10	51503335	51503335	rs7071471	SNP
10	51503375	51503375	rs7090326	SNP
10	51503559	51503559	rs2611471	SNP
10	51503977	51503977	rs12412140	SNP
10	51504385	51504385	rs4935573	SNP
10	51504493	51504493	rs745180	SNP
10	51504604	51504604	rs2337711	SNP
10	51504797	51504797	rs2012677	SNP
10	51504938	51504938	rs10763193	SNP
10	51505000	51505000	rs34974181	SNP
8	128103937	128103937	rs1456315	SNP
8	128103969	128103969	rs72725879	SNP
8	128104055	128104055	rs7463708	SNP
8	23500854	23500854	rs4872170	SNP
8	23501606	23501606	rs1398240	SNP
8	23501692	23501692	rs73216762	SNP
8	23501730	23501730	rs1398239	SNP
8	23502028	23502028	rs34703123	SNP
8	23502588	23502588	rs13256300	SNP
8	23502660	23502660	rs13256366	SNP
8	23502965	23502965	rs71504412	SNP
8	23504658	23504658	rs146486133	SNP
8	23504784	23504784	rs201177980	SNP
8	23504834	23504834	rs202107500	SNP
1	154859038	154859038	rs4845398	SNP
1	154859581	154859581	rs869506	SNP
1	204449952	204449952	rs7519417	SNP
1	204470129	204470129	rs10900594	SNP
1	204516025	204516025	rs2290854	SNP
1	204516947	204516947	rs4252734	SNP
1	204518842	204518842	rs4245739	SNP
1	204519693	204519693	rs11285873	SNP
1	204550366	204550366	rs5010868	SNP
10	104398895	104398895	rs12764219	SNP
12	49673158	49673158	rs11168963	SNP
12	53266739	53266739	rs73106451	SNP
12	53267309	53267309	rs56207534	SNP
12	53268073	53268073	rs147181250	SNP
12	53298775	53298775	rs137898974	SNP
14	53321246	53321246	rs74884304	SNP
14	53321273	53321273	rs62003514	SNP
14	53321340	53321340	rs62003515	SNP
14	53348540	53348540	rs62003529	SNP
14	69134264	69134264	rs767127	SNP
17	47358308	47358308	rs73340392	SNP
17	47445346	47445346	rs142415707	SNP
17	47446968	47446968	rs79768864	SNP
17	47447836	47447836	rs118099826	SNP
17	47447950	47447950	rs117801358	SNP
17	47448970	47448970	rs77488129	SNP
17	47449193	47449193	rs11650886	SNP
17	47455752	47455752	rs73324348	SNP
17	47456064	47456064	rs8065389	SNP
17	47456754	47456754	rs11650001	SNP
17	47457977	47457977	rs146060597	SNP
17	568153	568153	rs865702	SNP
19	38750100	38750100	rs34582151	SNP
19	51360840	51360840	rs62113212	SNP
19	51361757	51361757	rs17632542	SNP
19	51362537	51362537	rs62113214	SNP
19	51362715	51362715	rs76765083	SNP
2	173362046	173362046	rs79474289	SNP
2	173382777	173382777	rs115142421	SNP
2	173382986	173382986	rs76738244	SNP
2	242200406	242200406	rs4675970	SNP
2	242257835	242257835	rs62186433	SNP
2	242259207	242259207	rs6717633	SNP
2	242281438	242281438	rs12151655	SNP
2	242282957	242282957	rs12619369	SNP
2	242284405	242284405	rs62193175	SNP
2	242284824	242284824	rs1984598	SNP
2	242292307	242292307	rs1056801	SNP
2	242294301	242294301	rs62193197	SNP
2	242336614	242336614	rs62193213	SNP
2	242339656	242339656	rs28433352	SNP
2	242352257	242352257	rs60604866	SNP
2	242352582	242352582	rs3815262	SNP
2	242354632	242354632	rs62193221	SNP
2	242399863	242399863	rs2010169	SNP
2	85783128	85783128	rs6738645	SNP
20	62356627	62356627	rs6011058	SNP
20	62357866	62357866	chr20:62357866	SNP
3	113290450	113290450	rs13092681	SNP
3	113290793	113290793	rs4682495	SNP
3	113292637	113292637	rs28674622	SNP
3	113294482	113294482	rs1567780	SNP
3	127822320	127822320	rs7641133	SNP
3	127836287	127836287	rs4857836	SNP
3	127836319	127836319	rs4857837	SNP
3	127837449	127837449	rs11305690	SNP
3	127870060	127870060	rs2461794	SNP
3	128038373	128038373	rs10934853	SNP
3	141093285	141093285	rs7624084	SNP
3	141094209	141094209	rs6440003	SNP
3	141094769	141094769	rs4683605	SNP
3	141133450	141133450	rs1991431	SNP
6	31115711	31115711	rs1265068	SNP
6	31118511	31118511	rs130067	SNP
7	97732842	97732842	rs6969384	SNP
7	97825188	97825188	rs11764933	SNP
7	97826340	97826340	rs2132276	SNP
8	23501606	23501606	rs1398240	SNP
8	23501730	23501730	rs1398239	SNP
8	23502028	23502028	rs34703123	SNP
8	23502588	23502588	rs13256300	SNP
8	23502660	23502660	rs13256366	SNP
8	23502965	23502965	rs71504412	SNP
8	23504658	23504658	rs146486133	SNP
8	23504784	23504784	rs201177980	SNP
8	23504834	23504834	rs202107500	SNP
8	95934888	96071997	chr8:95934888-96071997	Duplicated CNV
8	127541694	127580670	chr8:127541694-127580670	Duplicated CNV
8	68865048	68911941	chr8:68865048-68911941	Duplicated CNV
8	86131710	86208801	chr8:86131710-86208801	Duplicated CNV
8	90766116	90940206	chr8:90766116-90940206	Duplicated CNV
8	95671128	95929848	chr8:95671128-95929848	Duplicated CNV
8	101639580	101671206	chr8:101639580-101671206	Duplicated CNV
9	140114121	140141799	chr9:140114121-140141799	Duplicated CNV
8	110868450	110924562	chr8:110868450-110924562	Duplicated CNV
8	91062804	91199535	chr8:91062804-91199535	Duplicated CNV
8	93659286	93690723	chr8:93659286-93690723	Duplicated CNV
3	172374048	172393956	chr3:172374048-172393956	Duplicated CNV
3	128894220	129091578	chr3:128894220-129091578	Duplicated CNV
3	129365607	129639825	chr3:129365607-129639825	Duplicated CNV
3	146884374	147286692	chr3:146884374-147286692	Duplicated CNV
3	149997666	150176313	chr3:149997666-150176313	Duplicated CNV
3	150880926	150922632	chr3:150880926-150922632	Duplicated CNV
3	154876995	155029686	chr3:154876995-155029686	Duplicated CNV
1	154518231	154711095	chr1:154518231-154711095	Duplicated CNV
8	66613260	66663786	chr8:66613260-66663786	Duplicated CNV
8	66678318	66946068	chr8:66678318-66946068	Duplicated CNV
1	154167993	154212975	chr1:154167993-154212975	Duplicated CNV
1	154711221	154866873	chr1:154711221-154866873	Duplicated CNV
1	154905975	155031387	chr1:154905975-155031387	Duplicated CNV
8	139405392	139579419	chr8:139405392-139579419	Duplicated CNV
8	140604156	140604177	chr8:140604156-140604177	Duplicated CNV
8	140626017	140661297	chr8:140626017-140661297	Duplicated CNV
1	153992727	154008330	chr1:153992727-154008330	Duplicated CNV
1	154049784	154057785	chr1:154049784-154057785	Duplicated CNV
3	115745616	116080545	chr3:115745616-116080545	Duplicated CNV
3	140621754	140770014	chr3:140621754-140770014	Duplicated CNV
3	170720487	171041535	chr3:170720487-171041535	Duplicated CNV
3	171454269	171670275	chr3:171454269-171670275	Duplicated CNV
3	178323327	178643682	chr3:178323327-178643682	Duplicated CNV
3	153964503	154067760	chr3:153964503-154067760	Duplicated CNV
3	113850198	113973720	chr3:113850198-113973720	Duplicated CNV
3	185645880	185875977	chr3:185645880-185875977	Duplicated CNV
3	105371028	105521178	chr3:105371028-105521178	Duplicated CNV
7	123126906	123573156	chr7:123126906-123573156	Duplicated CNV
3	187655328	187758816	chr3:187655328-187758816	Duplicated CNV
19	2138325	2275602	chr19:2138325-2275602	Duplicated CNV
3	187466475	187540122	chr3:187466475-187540122	Duplicated CNV
6	18365109	18544869	chr6:18365109-18544869	Duplicated CNV
7	97931337	98122668	chr7:97931337-98122668	Duplicated CNV
7	147373233	147561708	chr7:147373233-147561708	Duplicated CNV
7	148472037	148618008	chr7:148472037-148618008	Duplicated CNV
7	148684137	148770216	chr7:148684137-148770216	Duplicated CNV
7	151209576	151225053	chr7:151209576-151225053	Duplicated CNV
1	156018492	156023112	chr1:156018492-156023112	Duplicated CNV
1	156160137	156191973	chr1:156160137-156191973	Duplicated CNV
1	181375698	181524714	chr1:181375698-181524714	Duplicated CNV
1	203737212	203965881	chr1:203737212-203965881	Duplicated CNV
3	193457859	193771473	chr3:193457859-193771473	Duplicated CNV
1	156397038	156473940	chr1:156397038-156473940	Duplicated CNV
1	176479170	176612331	chr1:176479170-176612331	Duplicated CNV
1	177831780	177939342	chr1:177831780-177939342	Duplicated CNV
1	199105011	199449369	chr1:199105011-199449369	Duplicated CNV
9	106385265	106706208	chr9:106385265-106706208	Duplicated CNV
3	85686783	85900752	chr3:85686783-85900752	Duplicated CNV
3	88113039	88113669	chr3:88113039-88113669	Duplicated CNV
19	3423189	3543792	chr19:3423189-3543792	Duplicated CNV
3	33657981	33919977	chr3:33657981-33919977	Duplicated CNV
3	96061266	96063933	chr3:96061266-96063933	Duplicated CNV
5	6657987	6816180	chr5:6657987-6816180	Duplicated CNV
6	40748463	41299041	chr6:40748463-41299041	Duplicated CNV
6	41518827	41624562	chr6:41518827-41624562	Duplicated CNV
1	169473024	169705410	chr1:169473024-169705410	Duplicated CNV
1	205570407	205636326	chr1:205570407-205636326	Duplicated CNV
17	60860037	61053363	chr17:60860037-61053363	Duplicated CNV
5	157786797	158031594	chr5:157786797-158031594	Duplicated CNV
5	158107635	158140983	chr5:158107635-158140983	Duplicated CNV
5	158141949	158142411	chr5:158141949-158142411	Duplicated CNV
5	158143293	158288277	chr5:158143293-158288277	Duplicated CNV
11	69475308	69480369	chr11:69475308-69480369	Duplicated CNV
6	29823612	29828673	chr6:29823612-29828673	Duplicated CNV
9	84695583	85078014	chr9:84695583-85078014	Duplicated CNV
9	117803616	117826107	chr9:117803616-117826107	Duplicated CNV
9	117836292	117836313	chr9:117836292-117836313	Duplicated CNV
1	173976999	174126729	chr1:173976999-174126729	Duplicated CNV
17	46626321	46668867	chr17:46626321-46668867	Duplicated CNV
17	46686801	46716411	chr17:46686801-46716411	Duplicated CNV
17	55929321	56745507	chr17:55929321-56745507	Duplicated CNV
3	40638948	41155359	chr3:40638948-41155359	Duplicated CNV
5	3523506	3543288	chr5:3523506-3543288	Duplicated CNV
5	6574911	6654396	chr5:6574911-6654396	Duplicated CNV
5	10533516	10591140	chr5:10533516-10591140	Duplicated CNV
5	147588147	147869190	chr5:147588147-147869190	Duplicated CNV
5	148133958	148608474	chr5:148133958-148608474	Duplicated CNV
5	158639607	158702439	chr5:158639607-158702439	Duplicated CNV
5	175047663	175047957	chr5:175047663-175047957	Duplicated CNV
6	29912505	29912946	chr6:29912505-29912946	Duplicated CNV
9	20542956	20545476	chr9:20542956-20545476	Duplicated CNV
9	117837258	117964245	chr9:117837258-117964245	Duplicated CNV
1	209367270	209516412	chr1:209367270-209516412	Duplicated CNV
15	98072037	98510412	chr15:98072037-98510412	Duplicated CNV
3	14896392	15075312	chr3:14896392-15075312	Duplicated CNV
3	16417023	16680615	chr3:16417023-16680615	Duplicated CNV
3	52333659	52388385	chr3:52333659-52388385	Duplicated CNV
17	48720714	48722373	chr17:48720714-48722373	Duplicated CNV
17	54572889	55923462	chr17:54572889-55923462	Duplicated CNV
3	49013286	49055790	chr3:49013286-49055790	Duplicated CNV
3	62557110	62805918	chr3:62557110-62805918	Duplicated CNV
5	7591248	7662543	chr5:7591248-7662543	Duplicated CNV
5	161916741	162495900	chr5:161916741-162495900	Duplicated CNV
5	165880701	167414331	chr5:165880701-167414331	Duplicated CNV
10	61387263	62099814	chr10:61387263-62099814	Duplicated CNV
10	64679496	65633232	chr10:64679496-65633232	Duplicated CNV
19	33781692	33787278	chr19:33781692-33787278	Duplicated CNV
19	40733553	40743801	chr19:40733553-40743801	Duplicated CNV
6	30573858	30590994	chr6:30573858-30590994	Duplicated CNV
13	29202642	29364804	chr13:29202642-29364804	Duplicated CNV
14	35866425	35880705	chr14:35866425-35880705	Duplicated CNV
14	48730563	48978111	chr14:48730563-48978111	Duplicated CNV
1	226611840	227312085	chr1:226611840-227312085	Duplicated CNV
11	66571113	67261971	chr11:66571113-67261971	Duplicated CNV
1	36518706	36675492	chr1:36518706-36675492	Duplicated CNV
19	42746277	42838152	chr19:42746277-42838152	Duplicated CNV
17	38283672	38474793	chr17:38283672-38474793	Duplicated CNV
19	18223170	18253662	chr19:18223170-18253662	Duplicated CNV
19	40685106	40695060	chr19:40685106-40695060	Duplicated CNV
2	210362586	210525735	chr2:210362586-210525735	Duplicated CNV
1	36681456	37025247	chr1:36681456-37025247	Duplicated CNV
2	165751992	165755835	chr2:165751992-165755835	Duplicated CNV
2	192640623	192662610	chr2:192640623-192662610	Duplicated CNV
2	208735233	208789770	chr2:208735233-208789770	Duplicated CNV
21	9412494	9961707	chr21:9412494-9961707	Duplicated CNV
6	79875726	79979403	chr6:79875726-79979403	Duplicated CNV
14	38081883	38102148	chr14:38081883-38102148	Duplicated CNV
14	68783274	68942055	chr14:68783274-68942055	Duplicated CNV
17	28538622	28563906	chr17:28538622-28563906	Duplicated CNV
17	38242071	38250786	chr17:38242071-38250786	Duplicated CNV
17	43072911	43244040	chr17:43072911-43244040	Duplicated CNV
19	42906087	42924168	chr19:42906087-42924168	Duplicated CNV
8	37836435	37960188	chr8:37836435-37960188	Duplicated CNV
8	41381592	41536173	chr8:41381592-41536173	Duplicated CNV
8	41909343	42080262	chr8:41909343-42080262	Duplicated CNV
10	77927430	78953364	chr10:77927430-78953364	Duplicated CNV
11	56941185	57437562	chr11:56941185-57437562	Duplicated CNV
11	76544076	76638219	chr11:76544076-76638219	Duplicated CNV
2	11027961	11045265	chr2:11027961-11045265	Duplicated CNV
2	11597166	11757081	chr2:11597166-11757081	Duplicated CNV
2	12442290	12493047	chr2:12442290-12493047	Duplicated CNV
2	163317567	163403289	chr2:163317567-163403289	Duplicated CNV
2	199158834	199504410	chr2:199158834-199504410	Duplicated CNV
2	199554285	199972605	chr2:199554285-199972605	Duplicated CNV
3	70812000	71020509	chr3:70812000-71020509	Duplicated CNV
6	149175138	149587179	chr6:149175138-149587179	Duplicated CNV
6	152200377	152307708	chr6:152200377-152307708	Duplicated CNV
1	99077412	99602979	chr1:99077412-99602979	Duplicated CNV
11	125526030	126041706	chr11:125526030-126041706	Duplicated CNV
17	27715212	27863556	chr17:27715212-27863556	Duplicated CNV
5	58285332	58297890	chr5:58285332-58297890	Duplicated CNV
2	9821994	9822120	chr2:9821994-9822120	Duplicated CNV
2	171674706	171679641	chr2:171674706-171679641	Duplicated CNV
4	79795002	79865289	chr4:79795002-79865289	Duplicated CNV
4	106286460	106383795	chr4:106286460-106383795	Duplicated CNV
1	17681349	17773833	chr1:17681349-17773833	Duplicated CNV
1	35399973	35402724	chr1:35399973-35402724	Duplicated CNV
1	35657286	35657874	chr1:35657286-35657874	Duplicated CNV
10	117707016	118594308	chr10:117707016-118594308	Duplicated CNV
11	12161457	12163473	chr11:12161457-12163473	Duplicated CNV
11	123783240	123783828	chr11:123783240-123783828	Duplicated CNV
3	72606933	72863826	chr3:72606933-72863826	Duplicated CNV
1	35355390	35360850	chr1:35355390-35360850	Duplicated CNV
11	57446277	57934611	chr11:57446277-57934611	Duplicated CNV
11	57935472	57989022	chr11:57935472-57989022	Duplicated CNV
19	51314025	51449664	chr19:51314025-51449664	Duplicated CNV
2	21060774	21525168	chr2:21060774-21525168	Duplicated CNV
2	159198543	159301527	chr2:159198543-159301527	Duplicated CNV
2	171668952	171670107	chr2:171668952-171670107	Duplicated CNV
2	181583724	181726755	chr2:181583724-181726755	Duplicated CNV
6	139250538	140084532	chr6:139250538-140084532	Duplicated CNV
10	17554152	17659131	chr10:17554152-17659131	Duplicated CNV
18	20308134	20417040	chr18:20308134-20417040	Duplicated CNV
2	15725073	15846831	chr2:15725073-15846831	Duplicated CNV
2	16093686	16408707	chr2:16093686-16408707	Duplicated CNV
19	40793487	40794915	chr19:40793487-40794915	Duplicated CNV
3	71074206	71130276	chr3:71074206-71130276	Duplicated CNV
10	18448311	18614631	chr10:18448311-18614631	Duplicated CNV
2	26960619	27303444	chr2:26960619-27303444	Duplicated CNV
6	134583771	134585514	chr6:134583771-134585514	Duplicated CNV
10	104592243	104667423	chr10:104592243-104667423	Duplicated CNV
10	111962088	111977208	chr10:111962088-111977208	Duplicated CNV
2	128259411	128290113	chr2:128259411-128290113	Duplicated CNV
19	36155343	36569001	chr19:36155343-36569001	Duplicated CNV
2	31222947	31348443	chr2:31222947-31348443	Duplicated CNV
2	31352727	31369506	chr2:31352727-31369506	Duplicated CNV
2	55017543	55098477	chr2:55017543-55098477	Duplicated CNV
2	101568957	101624208	chr2:101568957-101624208	Duplicated CNV
2	103268508	103524939	chr2:103268508-103524939	Duplicated CNV
2	128201703	128256870	chr2:128201703-128256870	Duplicated CNV
2	174810909	175379421	chr2:174810909-175379421	Duplicated CNV
1	28210665	28319487	chr1:28210665-28319487	Duplicated CNV
10	104503581	104591151	chr10:104503581-104591151	Duplicated CNV
19	45579303	45823512	chr19:45579303-45823512	Duplicated CNV
2	70175343	70211946	chr2:70175343-70211946	Duplicated CNV
1	863520	878703	chr1:863520-878703	Deleted CNV
1	1821414	2093616	chr1:1821414-2093616	Deleted CNV
1	2097459	2159976	chr1:2097459-2159976	Deleted CNV
1	2531235	2560467	chr1:2531235-2560467	Deleted CNV
1	6266820	6333369	chr1:6266820-6333369	Deleted CNV
1	9697884	9713361	chr1:9697884-9713361	Deleted CNV
1	10822791	10896375	chr1:10822791-10896375	Deleted CNV
1	11181702	11266395	chr1:11181702-11266395	Deleted CNV
1	11742339	11742360	chr1:11742339-11742360	Deleted CNV
1	11886273	11935518	chr1:11886273-11935518	Deleted CNV
1	11975229	12064857	chr1:11975229-12064857	Deleted CNV
1	12355455	12605943	chr1:12355455-12605943	Deleted CNV
1	17880534	17930304	chr1:17880534-17930304	Deleted CNV
1	21566370	21627144	chr1:21566370-21627144	Deleted CNV
1	21748860	21790839	chr1:21748860-21790839	Deleted CNV
1	21879375	21940800	chr1:21879375-21940800	Deleted CNV
1	22988301	23074212	chr1:22988301-23074212	Deleted CNV
1	23179338	23207877	chr1:23179338-23207877	Deleted CNV
1	23520063	23676723	chr1:23520063-23676723	Deleted CNV
1	23692095	23695707	chr1:23692095-23695707	Deleted CNV
1	23695728	23793651	chr1:23695728-23793651	Deleted CNV
1	23829372	24249666	chr1:23829372-24249666	Deleted CNV
1	24394188	24513867	chr1:24394188-24513867	Deleted CNV
1	26768049	26811813	chr1:26768049-26811813	Deleted CNV
1	26836887	26904549	chr1:26836887-26904549	Deleted CNV
1	27364806	27418482	chr1:27364806-27418482	Deleted CNV
1	27435765	27549984	chr1:27435765-27549984	Deleted CNV
1	27579363	27632640	chr1:27579363-27632640	Deleted CNV
1	27698307	27744360	chr1:27698307-27744360	Deleted CNV
1	27791148	27880923	chr1:27791148-27880923	Deleted CNV
1	27895791	27956796	chr1:27895791-27956796	Deleted CNV
1	27968157	27972063	chr1:27968157-27972063	Deleted CNV
1	28003479	28051191	chr1:28003479-28051191	Deleted CNV
1	28147035	28194159	chr1:28147035-28194159	Deleted CNV
1	28211400	28239939	chr1:28211400-28239939	Deleted CNV
1	28400232	28430052	chr1:28400232-28430052	Deleted CNV
1	28431102	28432215	chr1:28431102-28432215	Deleted CNV
1	28442715	28442736	chr1:28442715-28442736	Deleted CNV
1	28493913	28553406	chr1:28493913-28553406	Deleted CNV
1	32197053	32255622	chr1:32197053-32255622	Deleted CNV
1	33905424	34059102	chr1:33905424-34059102	Deleted CNV
1	34748721	34872852	chr1:34748721-34872852	Deleted CNV
1	35334432	35383110	chr1:35334432-35383110	Deleted CNV
1	35401989	35632506	chr1:35401989-35632506	Deleted CNV
1	35650209	35652792	chr1:35650209-35652792	Deleted CNV
1	35655438	35664468	chr1:35655438-35664468	Deleted CNV
1	36516732	36589392	chr1:36516732-36589392	Deleted CNV
1	36592143	36620472	chr1:36592143-36620472	Deleted CNV
1	36689709	36764427	chr1:36689709-36764427	Deleted CNV
1	36807624	36832929	chr1:36807624-36832929	Deleted CNV
1	36960903	37086567	chr1:36960903-37086567	Deleted CNV
1	38453037	39049941	chr1:38453037-39049941	Deleted CNV
1	39274935	39334911	chr1:39274935-39334911	Deleted CNV
1	40448877	40980660	chr1:40448877-40980660	Deleted CNV
1	41179572	41836788	chr1:41179572-41836788	Deleted CNV
1	41898654	41953044	chr1:41898654-41953044	Deleted CNV
1	41998425	42264579	chr1:41998425-42264579	Deleted CNV
1	42325143	42554064	chr1:42325143-42554064	Deleted CNV
1	42731283	42944559	chr1:42731283-42944559	Deleted CNV
1	42944580	43058148	chr1:42944580-43058148	Deleted CNV
1	43693272	43762866	chr1:43693272-43762866	Deleted CNV
1	43771980	43825194	chr1:43771980-43825194	Deleted CNV
1	44022846	44125935	chr1:44022846-44125935	Deleted CNV
1	44304036	44385453	chr1:44304036-44385453	Deleted CNV
1	45315144	45342276	chr1:45315144-45342276	Deleted CNV
1	45798396	45801861	chr1:45798396-45801861	Deleted CNV
1	45803373	45808665	chr1:45803373-45808665	Deleted CNV
1	46092207	46155774	chr1:46092207-46155774	Deleted CNV
1	46495701	46532283	chr1:46495701-46532283	Deleted CNV
1	46818996	46868115	chr1:46818996-46868115	Deleted CNV
1	46882332	46899258	chr1:46882332-46899258	Deleted CNV
1	47618361	47628882	chr1:47618361-47628882	Deleted CNV
1	47930337	48178914	chr1:47930337-48178914	Deleted CNV
1	50657271	50714580	chr1:50657271-50714580	Deleted CNV
1	50770146	50783145	chr1:50770146-50783145	Deleted CNV
1	50784636	50789802	chr1:50784636-50789802	Deleted CNV
1	51643872	51726843	chr1:51643872-51726843	Deleted CNV
1	51992913	52007277	chr1:51992913-52007277	Deleted CNV
1	52020822	52243989	chr1:52020822-52243989	Deleted CNV
1	52272948	52305939	chr1:52272948-52305939	Deleted CNV
1	52609326	52743306	chr1:52609326-52743306	Deleted CNV
1	52774344	53015949	chr1:52774344-53015949	Deleted CNV
1	53101335	53157699	chr1:53101335-53157699	Deleted CNV
1	53496492	53500356	chr1:53496492-53500356	Deleted CNV
1	55244007	55484499	chr1:55244007-55484499	Deleted CNV
1	57705249	57816213	chr1:57705249-57816213	Deleted CNV
1	59244108	59260971	chr1:59244108-59260971	Deleted CNV
1	60210801	60366915	chr1:60210801-60366915	Deleted CNV
1	60378171	60587289	chr1:60378171-60587289	Deleted CNV
1	63207417	63605346	chr1:63207417-63605346	Deleted CNV
1	63822927	63852579	chr1:63822927-63852579	Deleted CNV
1	64677249	64779645	chr1:64677249-64779645	Deleted CNV
1	65044140	65062620	chr1:65044140-65062620	Deleted CNV
1	65335305	65363508	chr1:65335305-65363508	Deleted CNV
1	65486085	65500701	chr1:65486085-65500701	Deleted CNV
1	68255061	68420079	chr1:68255061-68420079	Deleted CNV
1	68528859	68904381	chr1:68528859-68904381	Deleted CNV
1	70568085	70851900	chr1:70568085-70851900	Deleted CNV
1	74099382	74164734	chr1:74099382-74164734	Deleted CNV
1	75098898	75149256	chr1:75098898-75149256	Deleted CNV
1	75614070	75823125	chr1:75614070-75823125	Deleted CNV
1	80870244	80956281	chr1:80870244-80956281	Deleted CNV
1	80999310	81151266	chr1:80999310-81151266	Deleted CNV
1	85147629	85210776	chr1:85147629-85210776	Deleted CNV
1	85263108	85285557	chr1:85263108-85285557	Deleted CNV
1	85344609	85452822	chr1:85344609-85452822	Deleted CNV
1	89473167	89749842	chr1:89473167-89749842	Deleted CNV
1	92057154	92149050	chr1:92057154-92149050	Deleted CNV
1	92152620	92199597	chr1:92152620-92199597	Deleted CNV
1	92579760	92656095	chr1:92579760-92656095	Deleted CNV
1	93411192	93437274	chr1:93411192-93437274	Deleted CNV
1	94366377	94459533	chr1:94366377-94459533	Deleted CNV
1	95362764	95615520	chr1:95362764-95615520	Deleted CNV
1	96410874	96678078	chr1:96410874-96678078	Deleted CNV
1	96707940	96971637	chr1:96707940-96971637	Deleted CNV
1	99436659	99610140	chr1:99436659-99610140	Deleted CNV
1	99696051	99822849	chr1:99696051-99822849	Deleted CNV
1	103210002	103361937	chr1:103210002-103361937	Deleted CNV
1	103509756	103569060	chr1:103509756-103569060	Deleted CNV
1	103575276	103575297	chr1:103575276-103575297	Deleted CNV
1	104037906	104104098	chr1:104037906-104104098	Deleted CNV
1	110892033	110991342	chr1:110892033-110991342	Deleted CNV
1	115605084	115668273	chr1:115605084-115668273	Deleted CNV
1	115691646	115832010	chr1:115691646-115832010	Deleted CNV
1	117200223	117226452	chr1:117200223-117226452	Deleted CNV
1	117750423	117868779	chr1:117750423-117868779	Deleted CNV
1	120275400	120303120	chr1:120275400-120303120	Deleted CNV
1	120310239	120336825	chr1:120310239-120336825	Deleted CNV
1	120478386	120531117	chr1:120478386-120531117	Deleted CNV
1	149852745	149866248	chr1:149852745-149866248	Deleted CNV
1	150005058	150116211	chr1:150005058-150116211	Deleted CNV
1	150134187	150165225	chr1:150134187-150165225	Deleted CNV
1	151341372	151497297	chr1:151341372-151497297	Deleted CNV
1	153640473	153655236	chr1:153640473-153655236	Deleted CNV
1	153735897	153765444	chr1:153735897-153765444	Deleted CNV
1	153984642	154388136	chr1:153984642-154388136	Deleted CNV
1	154445151	154547253	chr1:154445151-154547253	Deleted CNV
1	155062530	155159865	chr1:155062530-155159865	Deleted CNV
1	155263059	155329734	chr1:155263059-155329734	Deleted CNV
1	155982183	155993124	chr1:155982183-155993124	Deleted CNV
1	155994972	156001293	chr1:155994972-156001293	Deleted CNV
1	156016077	156023133	chr1:156016077-156023133	Deleted CNV
1	156032037	156040626	chr1:156032037-156040626	Deleted CNV
1	156062340	156077334	chr1:156062340-156077334	Deleted CNV
1	156460647	156547881	chr1:156460647-156547881	Deleted CNV
1	156625245	156709707	chr1:156625245-156709707	Deleted CNV
1	156771489	156796122	chr1:156771489-156796122	Deleted CNV
1	164876733	164904936	chr1:164876733-164904936	Deleted CNV
1	165338880	165399801	chr1:165338880-165399801	Deleted CNV
1	166747098	166845924	chr1:166747098-166845924	Deleted CNV
1	168735105	168930342	chr1:168735105-168930342	Deleted CNV
1	171160248	171204516	chr1:171160248-171204516	Deleted CNV
1	171724560	171939894	chr1:171724560-171939894	Deleted CNV
1	173916519	174007008	chr1:173916519-174007008	Deleted CNV
1	174767019	174871074	chr1:174767019-174871074	Deleted CNV
1	175110474	175311087	chr1:175110474-175311087	Deleted CNV
1	177291534	177340569	chr1:177291534-177340569	Deleted CNV
1	178183005	178470075	chr1:178183005-178470075	Deleted CNV
1	182069370	182316183	chr1:182069370-182316183	Deleted CNV
1	183407406	183780639	chr1:183407406-183780639	Deleted CNV
1	183803445	184141524	chr1:183803445-184141524	Deleted CNV
1	197178660	197326668	chr1:197178660-197326668	Deleted CNV
1	197861706	197891442	chr1:197861706-197891442	Deleted CNV
1	197939763	198462222	chr1:197939763-198462222	Deleted CNV
1	204670536	204873858	chr1:204670536-204873858	Deleted CNV
1	211341417	211413972	chr1:211341417-211413972	Deleted CNV
1	211763853	211816605	chr1:211763853-211816605	Deleted CNV
1	211834413	211987692	chr1:211834413-211987692	Deleted CNV
1	212162622	212342718	chr1:212162622-212342718	Deleted CNV
1	212735712	212752911	chr1:212735712-212752911	Deleted CNV
1	212851968	212890482	chr1:212851968-212890482	Deleted CNV
1	213363381	213451371	chr1:213363381-213451371	Deleted CNV
1	213496773	213807363	chr1:213496773-213807363	Deleted CNV
1	213877272	214129146	chr1:213877272-214129146	Deleted CNV
1	214724811	214874016	chr1:214724811-214874016	Deleted CNV
1	214901904	215040441	chr1:214901904-215040441	Deleted CNV
1	215068329	215127003	chr1:215068329-215127003	Deleted CNV
1	215716683	215831742	chr1:215716683-215831742	Deleted CNV
1	224673981	224744226	chr1:224673981-224744226	Deleted CNV
1	224908740	224928942	chr1:224908740-224928942	Deleted CNV
1	225580215	225696555	chr1:225580215-225696555	Deleted CNV
1	225843345	225880536	chr1:225843345-225880536	Deleted CNV
1	225880557	225958887	chr1:225880557-225958887	Deleted CNV
1	226550667	226550688	chr1:226550667-226550688	Deleted CNV
1	229528992	229899432	chr1:229528992-229899432	Deleted CNV
1	231283983	231526197	chr1:231283983-231526197	Deleted CNV
1	232003065	232055775	chr1:232003065-232055775	Deleted CNV
1	233034606	233113167	chr1:233034606-233113167	Deleted CNV
1	233347800	233471889	chr1:233347800-233471889	Deleted CNV
1	234827985	234863034	chr1:234827985-234863034	Deleted CNV
1	235024671	235158945	chr1:235024671-235158945	Deleted CNV
1	237611283	237690978	chr1:237611283-237690978	Deleted CNV
1	237936069	238285656	chr1:237936069-238285656	Deleted CNV
10	7623987	7624743	chr10:7623987-7624743	Deleted CNV
10	8418480	8426670	chr10:8418480-8426670	Deleted CNV
10	11565456	11568102	chr10:11565456-11568102	Deleted CNV
10	15218637	15333381	chr10:15218637-15333381	Deleted CNV
10	21756105	21785694	chr10:21756105-21785694	Deleted CNV
10	21851760	21980742	chr10:21851760-21980742	Deleted CNV
10	22025241	22103340	chr10:22025241-22103340	Deleted CNV
10	22123500	22145130	chr10:22123500-22145130	Deleted CNV
10	22188684	22310883	chr10:22188684-22310883	Deleted CNV
10	22660197	22694385	chr10:22660197-22694385	Deleted CNV
10	22878639	22885989	chr10:22878639-22885989	Deleted CNV
10	22908711	22940547	chr10:22908711-22940547	Deleted CNV
10	25980906	26095944	chr10:25980906-26095944	Deleted CNV
10	26469135	26641272	chr10:26469135-26641272	Deleted CNV
10	28631442	28882203	chr10:28631442-28882203	Deleted CNV
10	29687784	29965026	chr10:29687784-29965026	Deleted CNV
10	30953559	31074435	chr10:30953559-31074435	Deleted CNV
10	31835895	31936548	chr10:31835895-31936548	Deleted CNV
10	35930559	35992257	chr10:35930559-35992257	Deleted CNV
10	43245930	43450302	chr10:43245930-43450302	Deleted CNV
10	46173456	46249539	chr10:46173456-46249539	Deleted CNV
10	69686526	69744024	chr10:69686526-69744024	Deleted CNV
10	69912045	69912066	chr10:69912045-69912066	Deleted CNV
10	75021933	75224352	chr10:75021933-75224352	Deleted CNV
10	76489287	76767117	chr10:76489287-76767117	Deleted CNV
10	76813527	76849164	chr10:76813527-76849164	Deleted CNV
10	77124159	77150619	chr10:77124159-77150619	Deleted CNV
10	78772533	78938769	chr10:78772533-78938769	Deleted CNV
10	79756425	79783242	chr10:79756425-79783242	Deleted CNV
10	82249104	82321113	chr10:82249104-82321113	Deleted CNV
10	82620552	82856025	chr10:82620552-82856025	Deleted CNV
10	88681257	88818639	chr10:88681257-88818639	Deleted CNV
10	89604102	89617290	chr10:89604102-89617290	Deleted CNV
10	91025781	91043442	chr10:91025781-91043442	Deleted CNV
10	91068957	91169442	chr10:91068957-91169442	Deleted CNV
10	92172948	92220954	chr10:92172948-92220954	Deleted CNV
10	93657060	93719871	chr10:93657060-93719871	Deleted CNV
10	94831044	94859373	chr10:94831044-94859373	Deleted CNV
10	97009164	97028988	chr10:97009164-97028988	Deleted CNV
10	98447706	98481516	chr10:98447706-98481516	Deleted CNV
10	101861613	101958003	chr10:101861613-101958003	Deleted CNV
10	102064893	102370590	chr10:102064893-102370590	Deleted CNV
10	103367838	103490667	chr10:103367838-103490667	Deleted CNV
10	104502132	104541654	chr10:104502132-104541654	Deleted CNV
10	104583192	104936958	chr10:104583192-104936958	Deleted CNV
10	104955039	104987862	chr10:104955039-104987862	Deleted CNV
10	104987883	105151494	chr10:104987883-105151494	Deleted CNV
10	105162624	105164766	chr10:105162624-105164766	Deleted CNV
10	105221151	105242634	chr10:105221151-105242634	Deleted CNV
10	105259014	105362796	chr10:105259014-105362796	Deleted CNV
10	112185528	112476756	chr10:112185528-112476756	Deleted CNV
10	114161565	114255561	chr10:114161565-114255561	Deleted CNV
10	116723607	116819031	chr10:116723607-116819031	Deleted CNV
10	118380969	118594308	chr10:118380969-118594308	Deleted CNV
10	120556632	120851346	chr10:120556632-120851346	Deleted CNV
11	2720655	2812425	chr11:2720655-2812425	Deleted CNV
11	9119397	9223221	chr11:9119397-9223221	Deleted CNV
11	27800325	27938211	chr11:27800325-27938211	Deleted CNV
11	31930017	32585679	chr11:31930017-32585679	Deleted CNV
11	33415347	33766488	chr11:33415347-33766488	Deleted CNV
11	43584702	43612464	chr11:43584702-43612464	Deleted CNV
11	45931137	46050039	chr11:45931137-46050039	Deleted CNV
11	46326966	46410945	chr11:46326966-46410945	Deleted CNV
11	46702593	46724286	chr11:46702593-46724286	Deleted CNV
11	47190864	47227887	chr11:47190864-47227887	Deleted CNV
11	47258715	47300295	chr11:47258715-47300295	Deleted CNV
11	47373963	47387109	chr11:47373963-47387109	Deleted CNV
11	47402313	47452335	chr11:47402313-47452335	Deleted CNV
11	47737977	47849613	chr11:47737977-47849613	Deleted CNV
11	47895393	47999490	chr11:47895393-47999490	Deleted CNV
11	48156780	48186201	chr11:48156780-48186201	Deleted CNV
11	49858074	50083047	chr11:49858074-50083047	Deleted CNV
11	56726649	56900151	chr11:56726649-56900151	Deleted CNV
11	56938266	56938287	chr11:56938266-56938287	Deleted CNV
11	57029973	57082914	chr11:57029973-57082914	Deleted CNV
11	57083523	57130584	chr11:57083523-57130584	Deleted CNV
11	57146922	57175587	chr11:57146922-57175587	Deleted CNV
11	57359337	57359358	chr11:57359337-57359358	Deleted CNV
11	57956892	57989526	chr11:57956892-57989526	Deleted CNV
11	58040640	58085685	chr11:58040640-58085685	Deleted CNV
11	59224599	59248728	chr11:59224599-59248728	Deleted CNV
11	65717652	65811774	chr11:65717652-65811774	Deleted CNV
11	66103548	66173877	chr11:66103548-66173877	Deleted CNV
11	66225558	66247335	chr11:66225558-66247335	Deleted CNV
11	66571134	66585876	chr11:66571134-66585876	Deleted CNV
11	66585897	66636759	chr11:66585897-66636759	Deleted CNV
11	66665088	66695958	chr11:66665088-66695958	Deleted CNV
11	66749487	66773406	chr11:66749487-66773406	Deleted CNV
11	67351515	67367412	chr11:67351515-67367412	Deleted CNV
11	69473460	69475287	chr11:69473460-69475287	Deleted CNV
11	69475308	69480369	chr11:69475308-69480369	Deleted CNV
11	73669176	73901310	chr11:73669176-73901310	Deleted CNV
11	76084092	76099800	chr11:76084092-76099800	Deleted CNV
11	77642334	77695758	chr11:77642334-77695758	Deleted CNV
11	78228213	78352092	chr11:78228213-78352092	Deleted CNV
11	85615488	85632099	chr11:85615488-85632099	Deleted CNV
11	100688616	100708965	chr11:100688616-100708965	Deleted CNV
11	101574921	101971863	chr11:101574921-101971863	Deleted CNV
11	103561794	103812828	chr11:103561794-103812828	Deleted CNV
11	107991597	108065958	chr11:107991597-108065958	Deleted CNV
11	109574346	109822083	chr11:109574346-109822083	Deleted CNV
11	111236433	111250587	chr11:111236433-111250587	Deleted CNV
11	111315939	111434442	chr11:111315939-111434442	Deleted CNV
11	112452795	112467138	chr11:112452795-112467138	Deleted CNV
11	113645070	113755740	chr11:113645070-113755740	Deleted CNV
11	113866557	113969100	chr11:113866557-113969100	Deleted CNV
11	117094236	117099948	chr11:117094236-117099948	Deleted CNV
11	118561443	118610688	chr11:118561443-118610688	Deleted CNV
11	118765815	118951644	chr11:118765815-118951644	Deleted CNV
11	119177184	119224140	chr11:119177184-119224140	Deleted CNV
11	121326996	121481451	chr11:121326996-121481451	Deleted CNV
11	122845149	122848992	chr11:122845149-122848992	Deleted CNV
11	125298033	125454189	chr11:125298033-125454189	Deleted CNV
11	126568575	126990612	chr11:126568575-126990612	Deleted CNV
12	1646001	1658118	chr12:1646001-1658118	Deleted CNV
12	4393683	4508301	chr12:4393683-4508301	Deleted CNV
12	7869666	7958139	chr12:7869666-7958139	Deleted CNV
12	9113013	9231936	chr12:9113013-9231936	Deleted CNV
12	9935667	10013955	chr12:9935667-10013955	Deleted CNV
12	14088816	14331387	chr12:14088816-14331387	Deleted CNV
12	14923944	14984718	chr12:14923944-14984718	Deleted CNV
12	25059972	25166022	chr12:25059972-25166022	Deleted CNV
12	26525142	26546163	chr12:26525142-26546163	Deleted CNV
12	26546184	26593791	chr12:26546184-26593791	Deleted CNV
12	26745096	27055161	chr12:26745096-27055161	Deleted CNV
12	27794466	27957678	chr12:27794466-27957678	Deleted CNV
12	31418877	31675728	chr12:31418877-31675728	Deleted CNV
12	32537526	32594793	chr12:32537526-32594793	Deleted CNV
12	32801055	33020505	chr12:32801055-33020505	Deleted CNV
12	42114744	42266301	chr12:42114744-42266301	Deleted CNV
12	50453613	50586480	chr12:50453613-50586480	Deleted CNV
12	50660799	50762901	chr12:50660799-50762901	Deleted CNV
12	51032394	51210579	chr12:51032394-51210579	Deleted CNV
12	51231936	51303105	chr12:51231936-51303105	Deleted CNV
12	56785533	56793891	chr12:56785533-56793891	Deleted CNV
12	57453879	57701889	chr12:57453879-57701889	Deleted CNV
12	57988455	57997884	chr12:57988455-57997884	Deleted CNV
12	58010820	58032429	chr12:58010820-58032429	Deleted CNV
12	58034277	58080036	chr12:58034277-58080036	Deleted CNV
12	58093833	58098264	chr12:58093833-58098264	Deleted CNV
12	58114539	58165821	chr12:58114539-58165821	Deleted CNV
12	58173612	58180752	chr12:58173612-58180752	Deleted CNV
12	58209228	58327542	chr12:58209228-58327542	Deleted CNV
12	58476201	58541301	chr12:58476201-58541301	Deleted CNV
12	65520714	66420858	chr12:65520714-66420858	Deleted CNV
12	86278017	86278038	chr12:86278017-86278038	Deleted CNV
12	106956129	107457882	chr12:106956129-107457882	Deleted CNV
12	107463216	107526300	chr12:107463216-107526300	Deleted CNV
12	107550198	107923641	chr12:107550198-107923641	Deleted CNV
12	108715236	108789723	chr12:108715236-108789723	Deleted CNV
12	110269677	110276775	chr12:110269677-110276775	Deleted CNV
12	110323710	110362266	chr12:110323710-110362266	Deleted CNV
12	110698350	111002787	chr12:110698350-111002787	Deleted CNV
12	111002808	111223287	chr12:111002808-111223287	Deleted CNV
12	111270873	111270894	chr12:111270873-111270894	Deleted CNV
12	111281226	111291138	chr12:111281226-111291138	Deleted CNV
12	111322785	111341727	chr12:111322785-111341727	Deleted CNV
12	111353340	111366738	chr12:111353340-111366738	Deleted CNV
12	111366759	111408003	chr12:111366759-111408003	Deleted CNV
12	111432300	111513003	chr12:111432300-111513003	Deleted CNV
12	111826974	111836256	chr12:111826974-111836256	Deleted CNV
12	112217301	112248171	chr12:112217301-112248171	Deleted CNV
12	112436625	112562562	chr12:112436625-112562562	Deleted CNV
12	113024016	113136177	chr12:113024016-113136177	Deleted CNV
12	116713527	117402075	chr12:116713527-117402075	Deleted CNV
12	117471816	117812940	chr12:117471816-117812940	Deleted CNV
12	122336592	122336613	chr12:122336592-122336613	Deleted CNV
12	124355889	124606839	chr12:124355889-124606839	Deleted CNV
12	132668088	132957405	chr12:132668088-132957405	Deleted CNV
12	133170240	133185801	chr12:133170240-133185801	Deleted CNV
13	28412538	28649607	chr13:28412538-28649607	Deleted CNV
13	28823634	29128995	chr13:28823634-29128995	Deleted CNV
13	30654477	30682701	chr13:30654477-30682701	Deleted CNV
13	31033149	31140879	chr13:31033149-31140879	Deleted CNV
13	31774050	31980879	chr13:31774050-31980879	Deleted CNV
13	34044381	34295142	chr13:34044381-34295142	Deleted CNV
13	40348728	40623072	chr13:40348728-40623072	Deleted CNV
13	41114241	41140008	chr13:41114241-41140008	Deleted CNV
13	41567316	41685336	chr13:41567316-41685336	Deleted CNV
13	43648563	43880172	chr13:43648563-43880172	Deleted CNV
13	44718870	44869545	chr13:44718870-44869545	Deleted CNV
13	48894573	48897534	chr13:48894573-48897534	Deleted CNV
13	52186155	52321521	chr13:52186155-52321521	Deleted CNV
13	76101816	76194090	chr13:76101816-76194090	Deleted CNV
13	79999710	80606946	chr13:79999710-80606946	Deleted CNV
13	98591640	98719677	chr13:98591640-98719677	Deleted CNV
13	101278863	101304021	chr13:101278863-101304021	Deleted CNV
13	113515563	113562435	chr13:113515563-113562435	Deleted CNV
14	23322243	23560656	chr14:23322243-23560656	Deleted CNV
14	24244353	24257499	chr14:24244353-24257499	Deleted CNV
14	24768387	24868116	chr14:24768387-24868116	Deleted CNV
14	30961035	31454346	chr14:30961035-31454346	Deleted CNV
14	35821359	35852313	chr14:35821359-35852313	Deleted CNV
14	35897484	36091923	chr14:35897484-36091923	Deleted CNV
14	36965019	37230081	chr14:36965019-37230081	Deleted CNV
14	50259909	50324736	chr14:50259909-50324736	Deleted CNV
14	52529967	52534377	chr14:52529967-52534377	Deleted CNV
14	54886251	54961788	chr14:54886251-54961788	Deleted CNV
14	55085457	55160868	chr14:55085457-55160868	Deleted CNV
14	56222481	56232624	chr14:56222481-56232624	Deleted CNV
14	59130666	59810016	chr14:59130666-59810016	Deleted CNV
14	59997798	60158784	chr14:59997798-60158784	Deleted CNV
14	60666144	60683091	chr14:60666144-60683091	Deleted CNV
14	60683112	60717615	chr14:60683112-60717615	Deleted CNV
14	60796701	61214076	chr14:60796701-61214076	Deleted CNV
14	62361747	62540520	chr14:62361747-62540520	Deleted CNV
14	64462062	64695183	chr14:64462062-64695183	Deleted CNV
14	64717359	64820532	chr14:64717359-64820532	Deleted CNV
14	64845186	64880298	chr14:64845186-64880298	Deleted CNV
14	64880319	64985676	chr14:64880319-64985676	Deleted CNV
14	65117052	65223417	chr14:65117052-65223417	Deleted CNV
14	65281608	65611518	chr14:65281608-65611518	Deleted CNV
14	65645328	65741109	chr14:65645328-65741109	Deleted CNV
14	67855200	67875276	chr14:67855200-67875276	Deleted CNV
14	67890354	67918956	chr14:67890354-67918956	Deleted CNV
14	68115642	68183304	chr14:68115642-68183304	Deleted CNV
14	68203758	68242713	chr14:68203758-68242713	Deleted CNV
14	68271441	68323185	chr14:68271441-68323185	Deleted CNV
14	68356449	68367873	chr14:68356449-68367873	Deleted CNV
14	68825988	68863410	chr14:68825988-68863410	Deleted CNV
14	68876346	68949825	chr14:68876346-68949825	Deleted CNV
14	69395298	69478542	chr14:69395298-69478542	Deleted CNV
14	69675774	69784554	chr14:69675774-69784554	Deleted CNV
14	70458192	70652484	chr14:70458192-70652484	Deleted CNV
14	71315832	71484315	chr14:71315832-71484315	Deleted CNV
14	71597232	71738310	chr14:71597232-71738310	Deleted CNV
14	74809035	74917836	chr14:74809035-74917836	Deleted CNV
14	74963196	74994780	chr14:74963196-74994780	Deleted CNV
14	75732111	76028988	chr14:75732111-76028988	Deleted CNV
14	88746315	88907280	chr14:88746315-88907280	Deleted CNV
14	90549606	90662040	chr14:90549606-90662040	Deleted CNV
14	93330090	93363018	chr14:93330090-93363018	Deleted CNV
14	93520035	94111206	chr14:93520035-94111206	Deleted CNV
14	100603797	100632714	chr14:100603797-100632714	Deleted CNV
14	100877994	101268258	chr14:100877994-101268258	Deleted CNV
14	101988873	102165651	chr14:101988873-102165651	Deleted CNV
14	102186546	102496359	chr14:102186546-102496359	Deleted CNV
14	102497766	102559989	chr14:102497766-102559989	Deleted CNV
14	102626265	102660558	chr14:102626265-102660558	Deleted CNV
14	103310067	103371933	chr14:103310067-103371933	Deleted CNV
14	103518534	103564083	chr14:103518534-103564083	Deleted CNV
14	103577460	103647159	chr14:103577460-103647159	Deleted CNV
15	37364733	37477755	chr15:37364733-37477755	Deleted CNV
15	41089650	41190555	chr15:41089650-41190555	Deleted CNV
15	41824986	41845419	chr15:41824986-41845419	Deleted CNV
15	42586551	42602385	chr15:42586551-42602385	Deleted CNV
15	43642137	43671369	chr15:43642137-43671369	Deleted CNV
15	43701021	43804593	chr15:43701021-43804593	Deleted CNV
15	44854845	44909970	chr15:44854845-44909970	Deleted CNV
15	45393222	45403953	chr15:45393222-45403953	Deleted CNV
15	48696375	48739257	chr15:48696375-48739257	Deleted CNV
15	48879558	49044828	chr15:48879558-49044828	Deleted CNV
15	50157135	50577744	chr15:50157135-50577744	Deleted CNV
15	50617098	50660841	chr15:50617098-50660841	Deleted CNV
15	51548553	51566193	chr15:51548553-51566193	Deleted CNV
15	51900114	51970149	chr15:51900114-51970149	Deleted CNV
15	57058386	57257970	chr15:57058386-57257970	Deleted CNV
15	59435922	59531430	chr15:59435922-59531430	Deleted CNV
15	63753585	63789285	chr15:63753585-63789285	Deleted CNV
15	64331589	64343979	chr15:64331589-64343979	Deleted CNV
15	64344000	64451436	chr15:64344000-64451436	Deleted CNV
15	65675694	65689806	chr15:65675694-65689806	Deleted CNV
15	69138972	69325620	chr15:69138972-69325620	Deleted CNV
15	72105474	72330741	chr15:72105474-72330741	Deleted CNV
15	72464469	72705360	chr15:72464469-72705360	Deleted CNV
15	72755025	72947427	chr15:72755025-72947427	Deleted CNV
15	73170195	73231683	chr15:73170195-73231683	Deleted CNV
15	73322781	73424001	chr15:73322781-73424001	Deleted CNV
15	73558380	73631271	chr15:73558380-73631271	Deleted CNV
15	74493762	74538933	chr15:74493762-74538933	Deleted CNV
15	74601114	74629884	chr15:74601114-74629884	Deleted CNV
15	83526261	83739222	chr15:83526261-83739222	Deleted CNV
15	84283962	84332850	chr15:84283962-84332850	Deleted CNV
16	2080554	2124906	chr16:2080554-2124906	Deleted CNV
16	9763047	9943563	chr16:9763047-9943563	Deleted CNV
16	19143537	19313784	chr16:19143537-19313784	Deleted CNV
16	19983075	20359059	chr16:19983075-20359059	Deleted CNV
16	27715128	28016625	chr16:27715128-28016625	Deleted CNV
16	31098459	31168179	chr16:31098459-31168179	Deleted CNV
16	31200162	31200183	chr16:31200162-31200183	Deleted CNV
16	31336893	31366650	chr16:31336893-31366650	Deleted CNV
16	48227613	48283473	chr16:48227613-48283473	Deleted CNV
16	48656727	48675060	chr16:48656727-48675060	Deleted CNV
16	53527971	53544981	chr16:53527971-53544981	Deleted CNV
16	56174832	56347452	chr16:56174832-56347452	Deleted CNV
16	56561883	56711550	chr16:56561883-56711550	Deleted CNV
16	65589594	65797095	chr16:65589594-65797095	Deleted CNV
16	65823786	65932041	chr16:65823786-65932041	Deleted CNV
16	66356829	66389799	chr16:66356829-66389799	Deleted CNV
16	66476508	66488646	chr16:66476508-66488646	Deleted CNV
16	66512712	66541104	chr16:66512712-66541104	Deleted CNV
16	66581319	66614751	chr16:66581319-66614751	Deleted CNV
16	67720821	67777584	chr16:67720821-67777584	Deleted CNV
16	67871076	67942686	chr16:67871076-67942686	Deleted CNV
16	68683860	68829600	chr16:68683860-68829600	Deleted CNV
16	68861562	68888064	chr16:68861562-68888064	Deleted CNV
16	69090756	69201048	chr16:69090756-69201048	Deleted CNV
16	71201991	71214423	chr16:71201991-71214423	Deleted CNV
16	71268015	71318751	chr16:71268015-71318751	Deleted CNV
16	86014572	86120118	chr16:86014572-86120118	Deleted CNV
17	1400700	1452906	chr17:1400700-1452906	Deleted CNV
17	1804761	1834098	chr17:1804761-1834098	Deleted CNV
17	1887354	1914108	chr17:1887354-1914108	Deleted CNV
17	1970640	1994916	chr17:1970640-1994916	Deleted CNV
17	2354646	2370585	chr17:2354646-2370585	Deleted CNV
17	2544822	2666160	chr17:2544822-2666160	Deleted CNV
17	5278560	5419974	chr17:5278560-5419974	Deleted CNV
17	6321588	6337464	chr17:6321588-6337464	Deleted CNV
17	7604163	7623819	chr17:7604163-7623819	Deleted CNV
17	7994784	8003520	chr17:7994784-8003520	Deleted CNV
17	8039346	8074584	chr17:8039346-8074584	Deleted CNV
17	8083509	8147601	chr17:8083509-8147601	Deleted CNV
17	8173662	8280027	chr17:8173662-8280027	Deleted CNV
17	8283387	8621970	chr17:8283387-8621970	Deleted CNV
17	12406905	12676881	chr17:12406905-12676881	Deleted CNV
17	12838686	12878019	chr17:12838686-12878019	Deleted CNV
17	12884319	12942048	chr17:12884319-12942048	Deleted CNV
17	17128461	17149377	chr17:17128461-17149377	Deleted CNV
17	17234175	17245893	chr17:17234175-17245893	Deleted CNV
17	17926839	17986164	chr17:17926839-17986164	Deleted CNV
17	18031692	18136545	chr17:18031692-18136545	Deleted CNV
17	18224052	18302361	chr17:18224052-18302361	Deleted CNV
17	19679310	19692876	chr17:19679310-19692876	Deleted CNV
17	19725069	19750080	chr17:19725069-19750080	Deleted CNV
17	19777044	19794096	chr17:19777044-19794096	Deleted CNV
17	20919633	21208551	chr17:20919633-21208551	Deleted CNV
17	26168688	26342946	chr17:26168688-26342946	Deleted CNV
17	26405904	26557818	chr17:26405904-26557818	Deleted CNV
17	27250503	27269361	chr17:27250503-27269361	Deleted CNV
17	27281247	27308190	chr17:27281247-27308190	Deleted CNV
17	27335196	27367956	chr17:27335196-27367956	Deleted CNV
17	27367977	27442422	chr17:27367977-27442422	Deleted CNV
17	27457416	27653535	chr17:27457416-27653535	Deleted CNV
17	27722037	27816684	chr17:27722037-27816684	Deleted CNV
17	27850074	27881049	chr17:27850074-27881049	Deleted CNV
17	27893775	27893796	chr17:27893775-27893796	Deleted CNV
17	27922860	27969291	chr17:27922860-27969291	Deleted CNV
17	28574427	28698789	chr17:28574427-28698789	Deleted CNV
17	28734636	28868742	chr17:28734636-28868742	Deleted CNV
17	29432739	29487843	chr17:29432739-29487843	Deleted CNV
17	29539272	29553993	chr17:29539272-29553993	Deleted CNV
17	29759877	29881488	chr17:29759877-29881488	Deleted CNV
17	29897511	29942388	chr17:29897511-29942388	Deleted CNV
17	29969226	30041130	chr17:29969226-30041130	Deleted CNV
17	30056397	30078237	chr17:30056397-30078237	Deleted CNV
17	30295734	30611616	chr17:30295734-30611616	Deleted CNV
17	30629550	30856266	chr17:30629550-30856266	Deleted CNV
17	30885960	31187751	chr17:30885960-31187751	Deleted CNV
17	31230339	31318833	chr17:31230339-31318833	Deleted CNV
17	32869725	33219333	chr17:32869725-33219333	Deleted CNV
17	34272042	34335693	chr17:34272042-34335693	Deleted CNV
17	36581391	36711150	chr17:36581391-36711150	Deleted CNV
17	36857919	36964452	chr17:36857919-36964452	Deleted CNV
17	37038960	37063278	chr17:37038960-37063278	Deleted CNV
17	37136400	37252173	chr17:37136400-37252173	Deleted CNV
17	37256520	37267230	chr17:37256520-37267230	Deleted CNV
17	37281930	37302111	chr17:37281930-37302111	Deleted CNV
17	37789920	37798803	chr17:37789920-37798803	Deleted CNV
17	37913316	37921842	chr17:37913316-37921842	Deleted CNV
17	37921863	37937130	chr17:37921863-37937130	Deleted CNV
17	38025666	38083626	chr17:38025666-38083626	Deleted CNV
17	38131464	38259501	chr17:38131464-38259501	Deleted CNV
17	38261223	38283651	chr17:38261223-38283651	Deleted CNV
17	38348289	38462697	chr17:38348289-38462697	Deleted CNV
17	38754891	38796828	chr17:38754891-38796828	Deleted CNV
17	38812368	38913546	chr17:38812368-38913546	Deleted CNV
17	39685443	39873750	chr17:39685443-39873750	Deleted CNV
17	39892902	40047000	chr17:39892902-40047000	Deleted CNV
17	40221363	40238835	chr17:40221363-40238835	Deleted CNV
17	40601862	40774902	chr17:40601862-40774902	Deleted CNV
17	40914615	40947291	chr17:40914615-40947291	Deleted CNV
17	40974003	41079738	chr17:40974003-41079738	Deleted CNV
17	41285643	41301624	chr17:41285643-41301624	Deleted CNV
17	41441190	41458662	chr17:41441190-41458662	Deleted CNV
17	41521620	41602218	chr17:41521620-41602218	Deleted CNV
17	41657931	41661375	chr17:41657931-41661375	Deleted CNV
17	41699952	41711271	chr17:41699952-41711271	Deleted CNV
17	42007392	42022995	chr17:42007392-42022995	Deleted CNV
17	42235284	42280077	chr17:42235284-42280077	Deleted CNV
17	42366072	42411180	chr17:42366072-42411180	Deleted CNV
17	42460782	42570150	chr17:42460782-42570150	Deleted CNV
17	42581322	42625128	chr17:42581322-42625128	Deleted CNV
17	42625149	42693168	chr17:42625149-42693168	Deleted CNV
17	43941765	44002791	chr17:43941765-44002791	Deleted CNV
17	44079567	44163798	chr17:44079567-44163798	Deleted CNV
17	44936367	44983890	chr17:44936367-44983890	Deleted CNV
17	44984457	45106887	chr17:44984457-45106887	Deleted CNV
17	45175599	45241140	chr17:45175599-45241140	Deleted CNV
17	45886596	45959214	chr17:45886596-45959214	Deleted CNV
17	46122741	46160226	chr17:46122741-46160226	Deleted CNV
17	46245192	46258107	chr17:46245192-46258107	Deleted CNV
17	46426044	46607547	chr17:46426044-46607547	Deleted CNV
17	48716598	48739572	chr17:48716598-48739572	Deleted CNV
17	48768090	48792366	chr17:48768090-48792366	Deleted CNV
17	48888483	48957300	chr17:48888483-48957300	Deleted CNV
17	49205163	49259238	chr17:49205163-49259238	Deleted CNV
17	49424634	49745955	chr17:49424634-49745955	Deleted CNV
17	51890790	51909123	chr17:51890790-51909123	Deleted CNV
17	53576502	53729655	chr17:53576502-53729655	Deleted CNV
17	56022183	56073549	chr17:56022183-56073549	Deleted CNV
17	56250789	56267589	chr17:56250789-56267589	Deleted CNV
17	56463351	56520912	chr17:56463351-56520912	Deleted CNV
17	57406419	57426222	chr17:57406419-57426222	Deleted CNV
17	57466395	57500667	chr17:57466395-57500667	Deleted CNV
17	57514716	57547077	chr17:57514716-57547077	Deleted CNV
17	57760731	57846390	chr17:57760731-57846390	Deleted CNV
17	57885870	57937656	chr17:57885870-57937656	Deleted CNV
17	58033941	58038498	chr17:58033941-58038498	Deleted CNV
17	58645041	58824045	chr17:58645041-58824045	Deleted CNV
17	59082387	59117352	chr17:59082387-59117352	Deleted CNV
17	59849055	60188205	chr17:59849055-60188205	Deleted CNV
17	60301710	60348750	chr17:60301710-60348750	Deleted CNV
17	60380271	60454233	chr17:60380271-60454233	Deleted CNV
17	60484242	60656400	chr17:60484242-60656400	Deleted CNV
17	61323759	61491717	chr17:61323759-61491717	Deleted CNV
17	61538232	61546401	chr17:61538232-61546401	Deleted CNV
17	61552281	61580988	chr17:61552281-61580988	Deleted CNV
17	62017074	62038074	chr17:62017074-62038074	Deleted CNV
17	62057877	62070729	chr17:62057877-62070729	Deleted CNV
17	62213172	62319621	chr17:62213172-62319621	Deleted CNV
17	62431530	62720700	chr17:62431530-62720700	Deleted CNV
17	62800185	62985867	chr17:62800185-62985867	Deleted CNV
17	63159138	63430395	chr17:63159138-63430395	Deleted CNV
17	63494277	63552258	chr17:63494277-63552258	Deleted CNV
17	69915090	70299663	chr17:69915090-70299663	Deleted CNV
17	78765036	78915879	chr17:78765036-78915879	Deleted CNV
18	10263414	10575516	chr18:10263414-10575516	Deleted CNV
18	11149215	11558232	chr18:11149215-11558232	Deleted CNV
18	14762601	14770056	chr18:14762601-14770056	Deleted CNV
18	19565112	19680780	chr18:19565112-19680780	Deleted CNV
18	19711146	19711167	chr18:19711146-19711167	Deleted CNV
18	19770366	19820220	chr18:19770366-19820220	Deleted CNV
18	19835004	19924149	chr18:19835004-19924149	Deleted CNV
18	23805663	23889411	chr18:23805663-23889411	Deleted CNV
18	24000375	24056592	chr18:24000375-24056592	Deleted CNV
18	32451867	32476836	chr18:32451867-32476836	Deleted CNV
18	33722157	33834339	chr18:33722157-33834339	Deleted CNV
18	34842591	34872936	chr18:34842591-34872936	Deleted CNV
18	37626834	37766211	chr18:37626834-37766211	Deleted CNV
18	38818353	39369267	chr18:38818353-39369267	Deleted CNV
18	43609188	43867635	chr18:43609188-43867635	Deleted CNV
18	44136351	44246685	chr18:44136351-44246685	Deleted CNV
18	46290762	46355799	chr18:46290762-46355799	Deleted CNV
18	48387780	48519555	chr18:48387780-48519555	Deleted CNV
18	51881697	52493364	chr18:51881697-52493364	Deleted CNV
19	7803411	7889952	chr19:7803411-7889952	Deleted CNV
19	10262343	10272255	chr19:10262343-10272255	Deleted CNV
19	11158245	11273010	chr19:11158245-11273010	Deleted CNV
19	34692189	34976739	chr19:34692189-34976739	Deleted CNV
19	40846554	41167245	chr19:40846554-41167245	Deleted CNV
19	41728239	41741217	chr19:41728239-41741217	Deleted CNV
2	7675542	7817796	chr2:7675542-7817796	Deleted CNV
2	7843941	7853034	chr2:7843941-7853034	Deleted CNV
2	8371944	8605401	chr2:8371944-8605401	Deleted CNV
2	16021278	16973040	chr2:16021278-16973040	Deleted CNV
2	17953551	17988621	chr2:17953551-17988621	Deleted CNV
2	23823261	23850435	chr2:23823261-23850435	Deleted CNV
2	25675692	25711014	chr2:25675692-25711014	Deleted CNV
2	27377763	27601014	chr2:27377763-27601014	Deleted CNV
2	27865467	27976536	chr2:27865467-27976536	Deleted CNV
2	32611530	32706723	chr2:32611530-32706723	Deleted CNV
2	32750361	32761701	chr2:32750361-32761701	Deleted CNV
2	39156789	39180813	chr2:39156789-39180813	Deleted CNV
2	55629378	55694079	chr2:55629378-55694079	Deleted CNV
2	60885741	60911466	chr2:60885741-60911466	Deleted CNV
2	61002627	61016970	chr2:61002627-61016970	Deleted CNV
2	61280646	61310844	chr2:61280646-61310844	Deleted CNV
2	61328106	61349568	chr2:61328106-61349568	Deleted CNV
2	61357128	61509231	chr2:61357128-61509231	Deleted CNV
2	61583319	61849893	chr2:61583319-61849893	Deleted CNV
2	62484387	62484408	chr2:62484387-62484408	Deleted CNV
2	62906655	62941116	chr2:62906655-62941116	Deleted CNV
2	63168735	63201180	chr2:63168735-63201180	Deleted CNV
2	63919737	64104012	chr2:63919737-64104012	Deleted CNV
2	69287064	69369510	chr2:69287064-69369510	Deleted CNV
2	69372261	69694926	chr2:69372261-69694926	Deleted CNV
2	70750239	71412432	chr2:70750239-71412432	Deleted CNV
2	73073973	73214757	chr2:73073973-73214757	Deleted CNV
2	74047680	74109861	chr2:74047680-74109861	Deleted CNV
2	74501679	74805003	chr2:74501679-74805003	Deleted CNV
2	85056636	85296036	chr2:85056636-85296036	Deleted CNV
2	86020641	86168838	chr2:86020641-86168838	Deleted CNV
2	86462880	86876664	chr2:86462880-86876664	Deleted CNV
2	88740456	88813452	chr2:88740456-88813452	Deleted CNV
2	88851147	88899426	chr2:88851147-88899426	Deleted CNV
2	95585469	95732112	chr2:95585469-95732112	Deleted CNV
2	98449323	98642250	chr2:98449323-98642250	Deleted CNV
2	99309945	99358665	chr2:99309945-99358665	Deleted CNV
2	99413244	99457533	chr2:99413244-99457533	Deleted CNV
2	99759765	99870288	chr2:99759765-99870288	Deleted CNV
2	100004310	100197174	chr2:100004310-100197174	Deleted CNV
2	103670805	103969299	chr2:103670805-103969299	Deleted CNV
2	104479179	104700435	chr2:104479179-104700435	Deleted CNV
2	105799512	105882777	chr2:105799512-105882777	Deleted CNV
2	106011108	106166298	chr2:106011108-106166298	Deleted CNV
2	108777039	109154451	chr2:108777039-109154451	Deleted CNV
2	113295567	113433264	chr2:113295567-113433264	Deleted CNV
2	118646220	118915125	chr2:118646220-118915125	Deleted CNV
2	120983436	121012311	chr2:120983436-121012311	Deleted CNV
2	135627660	135752673	chr2:135627660-135752673	Deleted CNV
2	136396554	136608780	chr2:136396554-136608780	Deleted CNV
2	136638894	136762563	chr2:136638894-136762563	Deleted CNV
2	136773210	136819389	chr2:136773210-136819389	Deleted CNV
2	137047596	137126556	chr2:137047596-137126556	Deleted CNV
2	137152554	137277315	chr2:137152554-137277315	Deleted CNV
2	139047867	139141443	chr2:139047867-139141443	Deleted CNV
2	139230819	139320762	chr2:139230819-139320762	Deleted CNV
2	139330044	139347852	chr2:139330044-139347852	Deleted CNV
2	139514382	139629273	chr2:139514382-139629273	Deleted CNV
2	143721270	143881332	chr2:143721270-143881332	Deleted CNV
2	144103575	144285477	chr2:144103575-144285477	Deleted CNV
2	144297279	144359754	chr2:144297279-144359754	Deleted CNV
2	144416055	144428403	chr2:144416055-144428403	Deleted CNV
2	145577439	145800018	chr2:145577439-145800018	Deleted CNV
2	152124609	152125953	chr2:152124609-152125953	Deleted CNV
2	158120676	158156481	chr2:158120676-158156481	Deleted CNV
2	158430153	158475849	chr2:158430153-158475849	Deleted CNV
2	158756262	158802651	chr2:158756262-158802651	Deleted CNV
2	159549789	159573582	chr2:159549789-159573582	Deleted CNV
2	161882406	161903889	chr2:161882406-161903889	Deleted CNV
2	162900360	163128840	chr2:162900360-163128840	Deleted CNV
2	163212483	163365951	chr2:163212483-163365951	Deleted CNV
2	169881600	170043363	chr2:169881600-170043363	Deleted CNV
2	171438498	171494841	chr2:171438498-171494841	Deleted CNV
2	171494862	171572919	chr2:171494862-171572919	Deleted CNV
2	171572940	171636507	chr2:171572940-171636507	Deleted CNV
2	172282362	172340364	chr2:172282362-172340364	Deleted CNV
2	173315247	173419218	chr2:173315247-173419218	Deleted CNV
2	173872356	173917905	chr2:173872356-173917905	Deleted CNV
2	173917926	174145545	chr2:173917926-174145545	Deleted CNV
2	174288702	174364869	chr2:174288702-174364869	Deleted CNV
2	175367850	175379442	chr2:175367850-175379442	Deleted CNV
2	178005660	178148775	chr2:178005660-178148775	Deleted CNV
2	179890851	179929911	chr2:179890851-179929911	Deleted CNV
2	181704894	181878774	chr2:181704894-181878774	Deleted CNV
2	187516413	187573491	chr2:187516413-187573491	Deleted CNV
2	190792224	190807701	chr2:190792224-190807701	Deleted CNV
2	190993551	191043993	chr2:190993551-191043993	Deleted CNV
2	191076270	191255988	chr2:191076270-191255988	Deleted CNV
2	197141490	197271795	chr2:197141490-197271795	Deleted CNV
2	198941589	198949527	chr2:198941589-198949527	Deleted CNV
2	198992724	199179309	chr2:198992724-199179309	Deleted CNV
2	199399641	199525368	chr2:199399641-199525368	Deleted CNV
2	204462741	204537543	chr2:204462741-204537543	Deleted CNV
2	210553560	210621957	chr2:210553560-210621957	Deleted CNV
2	219092139	219236346	chr2:219092139-219236346	Deleted CNV
2	219371250	219881571	chr2:219371250-219881571	Deleted CNV
2	219887178	220062654	chr2:219887178-220062654	Deleted CNV
2	220120152	220178091	chr2:220120152-220178091	Deleted CNV
2	235852470	235852491	chr2:235852470-235852491	Deleted CNV
20	13874490	13890303	chr20:13874490-13890303	Deleted CNV
20	13909287	13989444	chr20:13909287-13989444	Deleted CNV
20	20633025	21019467	chr20:20633025-21019467	Deleted CNV
20	24970848	25020030	chr20:24970848-25020030	Deleted CNV
20	30151380	30233637	chr20:30151380-30233637	Deleted CNV
20	30256695	30270618	chr20:30256695-30270618	Deleted CNV
20	30419718	30450063	chr20:30419718-30450063	Deleted CNV
20	32528727	32786397	chr20:32528727-32786397	Deleted CNV
20	32999001	33300981	chr20:32999001-33300981	Deleted CNV
20	34202994	34400877	chr20:34202994-34400877	Deleted CNV
20	35522403	35522424	chr20:35522403-35522424	Deleted CNV
20	35656866	35754117	chr20:35656866-35754117	Deleted CNV
20	44573298	44601165	chr20:44573298-44601165	Deleted CNV
20	48573546	48584949	chr20:48573546-48584949	Deleted CNV
20	51119250	51606828	chr20:51119250-51606828	Deleted CNV
20	52795302	52968195	chr20:52795302-52968195	Deleted CNV
20	54959751	55012251	chr20:54959751-55012251	Deleted CNV
20	57806028	58024596	chr20:57806028-58024596	Deleted CNV
20	60494742	60581892	chr20:60494742-60581892	Deleted CNV
21	9427950	10031448	chr21:9427950-10031448	Deleted CNV
21	39883137	39894960	chr21:39883137-39894960	Deleted CNV
21	39945024	39988431	chr21:39945024-39988431	Deleted CNV
21	40061574	40102545	chr21:40061574-40102545	Deleted CNV
21	40939290	40979904	chr21:40939290-40979904	Deleted CNV
21	41187972	41467167	chr21:41187972-41467167	Deleted CNV
21	42883176	42912345	chr21:42883176-42912345	Deleted CNV
22	24616494	25001130	chr22:24616494-25001130	Deleted CNV
22	26765697	26890017	chr22:26765697-26890017	Deleted CNV
22	28167762	28209237	chr22:28167762-28209237	Deleted CNV
22	29450673	29634864	chr22:29450673-29634864	Deleted CNV
22	30953559	31078551	chr22:30953559-31078551	Deleted CNV
22	31160535	31250898	chr22:31160535-31250898	Deleted CNV
22	31424547	31487085	chr22:31424547-31487085	Deleted CNV
22	31541496	31634610	chr22:31541496-31634610	Deleted CNV
22	32817540	32850006	chr22:32817540-32850006	Deleted CNV
22	34388025	34510140	chr22:34388025-34510140	Deleted CNV
22	38008215	38050572	chr22:38008215-38050572	Deleted CNV
22	38050593	38207904	chr22:38050593-38207904	Deleted CNV
22	38622948	38636052	chr22:38622948-38636052	Deleted CNV
22	38686914	38853255	chr22:38686914-38853255	Deleted CNV
22	40948761	41058864	chr22:40948761-41058864	Deleted CNV
22	41072661	41107878	chr22:41072661-41107878	Deleted CNV
22	41469099	41488104	chr22:41469099-41488104	Deleted CNV
22	41641320	41701968	chr22:41641320-41701968	Deleted CNV
22	42346542	42365001	chr22:42346542-42365001	Deleted CNV
22	43587516	43664754	chr22:43587516-43664754	Deleted CNV
22	43719459	43789053	chr22:43719459-43789053	Deleted CNV
22	44330601	44385558	chr22:44330601-44385558	Deleted CNV
22	44810178	44922927	chr22:44810178-44922927	Deleted CNV
22	45591945	45605343	chr22:45591945-45605343	Deleted CNV
22	45989874	46065852	chr22:45989874-46065852	Deleted CNV
22	46540578	46555194	chr22:46540578-46555194	Deleted CNV
22	46563699	46647384	chr22:46563699-46647384	Deleted CNV
3	3148656	3386397	chr3:3148656-3386397	Deleted CNV
3	9242184	9245838	chr3:9242184-9245838	Deleted CNV
3	9389478	9841335	chr3:9389478-9841335	Deleted CNV
3	12318222	12428199	chr3:12318222-12428199	Deleted CNV
3	16660623	16765686	chr3:16660623-16765686	Deleted CNV
3	27608301	28060620	chr3:27608301-28060620	Deleted CNV
3	30754227	30832410	chr3:30754227-30832410	Deleted CNV
3	30985164	31555356	chr3:30985164-31555356	Deleted CNV
3	36963738	37016490	chr3:36963738-37016490	Deleted CNV
3	40866630	41011761	chr3:40866630-41011761	Deleted CNV
3	44911188	45077277	chr3:44911188-45077277	Deleted CNV
3	46883382	46900119	chr3:46883382-46900119	Deleted CNV
3	46917549	46992078	chr3:46917549-46992078	Deleted CNV
3	47178684	47315331	chr3:47178684-47315331	Deleted CNV
3	47892075	47907489	chr3:47892075-47907489	Deleted CNV
3	48275535	48332886	chr3:48275535-48332886	Deleted CNV
3	48771912	49061313	chr3:48771912-49061313	Deleted CNV
3	49190001	49246428	chr3:49190001-49246428	Deleted CNV
3	49381437	49602525	chr3:49381437-49602525	Deleted CNV
3	49667709	49682136	chr3:49667709-49682136	Deleted CNV
3	49699629	49710129	chr3:49699629-49710129	Deleted CNV
3	49710150	49791903	chr3:49710150-49791903	Deleted CNV
3	49824768	49863471	chr3:49824768-49863471	Deleted CNV
3	49870779	49894866	chr3:49870779-49894866	Deleted CNV
3	50644671	50674407	chr3:50644671-50674407	Deleted CNV
3	51391326	51574824	chr3:51391326-51574824	Deleted CNV
3	51659286	51747024	chr3:51659286-51747024	Deleted CNV
3	51830037	51890412	chr3:51830037-51890412	Deleted CNV
3	51924537	51949317	chr3:51924537-51949317	Deleted CNV
3	51964878	51977604	chr3:51964878-51977604	Deleted CNV
3	52273011	52322424	chr3:52273011-52322424	Deleted CNV
3	52322781	52322802	chr3:52322781-52322802	Deleted CNV
3	52341765	52399851	chr3:52341765-52399851	Deleted CNV
3	52453044	52458819	chr3:52453044-52458819	Deleted CNV
3	52463397	52582467	chr3:52463397-52582467	Deleted CNV
3	52609452	52711848	chr3:52609452-52711848	Deleted CNV
3	74588787	74589963	chr3:74588787-74589963	Deleted CNV
3	74589984	74606742	chr3:74589984-74606742	Deleted CNV
3	93607794	94069542	chr3:93607794-94069542	Deleted CNV
3	94823778	94934532	chr3:94823778-94934532	Deleted CNV
3	95363625	95415684	chr3:95363625-95415684	Deleted CNV
3	97195665	97308099	chr3:97195665-97308099	Deleted CNV
3	98081067	98230146	chr3:98081067-98230146	Deleted CNV
3	98480193	98691201	chr3:98480193-98691201	Deleted CNV
3	101205405	101574249	chr3:101205405-101574249	Deleted CNV
3	110994996	111292944	chr3:110994996-111292944	Deleted CNV
3	114075003	114170742	chr3:114075003-114170742	Deleted CNV
3	119501991	119514297	chr3:119501991-119514297	Deleted CNV
3	119593950	119788095	chr3:119593950-119788095	Deleted CNV
3	121207968	121377921	chr3:121207968-121377921	Deleted CNV
3	123305343	123379830	chr3:123305343-123379830	Deleted CNV
3	129687873	129705261	chr3:129687873-129705261	Deleted CNV
3	130368882	130625985	chr3:130368882-130625985	Deleted CNV
3	135923781	135962799	chr3:135923781-135962799	Deleted CNV
3	136044552	136120908	chr3:136044552-136120908	Deleted CNV
3	136614177	136669407	chr3:136614177-136669407	Deleted CNV
3	136704309	136748451	chr3:136704309-136748451	Deleted CNV
3	138108999	138122271	chr3:138108999-138122271	Deleted CNV
3	138133989	138182814	chr3:138133989-138182814	Deleted CNV
3	138207132	138293085	chr3:138207132-138293085	Deleted CNV
3	138342015	138420765	chr3:138342015-138420765	Deleted CNV
3	141557577	141839313	chr3:141557577-141839313	Deleted CNV
3	142125354	142355094	chr3:142125354-142355094	Deleted CNV
3	142431492	142535400	chr3:142431492-142535400	Deleted CNV
3	155898855	156019815	chr3:155898855-156019815	Deleted CNV
3	156812670	157208541	chr3:156812670-157208541	Deleted CNV
3	164517171	164592435	chr3:164517171-164592435	Deleted CNV
3	168842205	169181838	chr3:168842205-169181838	Deleted CNV
3	169912113	169939476	chr3:169912113-169939476	Deleted CNV
3	170754066	171006423	chr3:170754066-171006423	Deleted CNV
3	176723295	176910972	chr3:176723295-176910972	Deleted CNV
3	178414719	178517262	chr3:178414719-178517262	Deleted CNV
3	179440863	179440884	chr3:179440863-179440884	Deleted CNV
3	179605671	179704413	chr3:179605671-179704413	Deleted CNV
3	183280146	183818082	chr3:183280146-183818082	Deleted CNV
3	183886584	184088268	chr3:183886584-184088268	Deleted CNV
3	184510263	184654281	chr3:184510263-184654281	Deleted CNV
3	184796241	185144295	chr3:184796241-185144295	Deleted CNV
3	185174955	185188164	chr3:185174955-185188164	Deleted CNV
3	185188185	185356857	chr3:185188185-185356857	Deleted CNV
3	185398689	185503836	chr3:185398689-185503836	Deleted CNV
3	195724641	195829767	chr3:195724641-195829767	Deleted CNV
3	196459851	196471632	chr3:196459851-196471632	Deleted CNV
4	541401	605598	chr4:541401-605598	Deleted CNV
4	7938672	7963998	chr4:7938672-7963998	Deleted CNV
4	8729490	8731317	chr4:8729490-8731317	Deleted CNV
4	8911644	8945349	chr4:8911644-8945349	Deleted CNV
4	23789472	24030132	chr4:23789472-24030132	Deleted CNV
4	26231688	26652780	chr4:26231688-26652780	Deleted CNV
4	37468641	37643487	chr4:37468641-37643487	Deleted CNV
4	40803756	41052774	chr4:40803756-41052774	Deleted CNV
4	42478884	42552069	chr4:42478884-42552069	Deleted CNV
4	46593141	47000898	chr4:46593141-47000898	Deleted CNV
4	53316774	53444685	chr4:53316774-53444685	Deleted CNV
4	65592807	65645979	chr4:65592807-65645979	Deleted CNV
4	72186828	72215241	chr4:72186828-72215241	Deleted CNV
4	75817728	75964854	chr4:75817728-75964854	Deleted CNV
4	76546071	76881042	chr4:76546071-76881042	Deleted CNV
4	87825864	87825885	chr4:87825864-87825885	Deleted CNV
4	87977442	88052433	chr4:87977442-88052433	Deleted CNV
4	88691295	88749675	chr4:88691295-88749675	Deleted CNV
4	88862655	88946403	chr4:88862655-88946403	Deleted CNV
4	99403941	99459318	chr4:99403941-99459318	Deleted CNV
4	103417965	103462170	chr4:103417965-103462170	Deleted CNV
4	103923603	104025936	chr4:103923603-104025936	Deleted CNV
4	115568712	115650864	chr4:115568712-115650864	Deleted CNV
4	118220823	118350162	chr4:118220823-118350162	Deleted CNV
4	119545692	119721147	chr4:119545692-119721147	Deleted CNV
4	119927955	119992887	chr4:119927955-119992887	Deleted CNV
4	122892294	123140934	chr4:122892294-123140934	Deleted CNV
4	128517774	128675841	chr4:128517774-128675841	Deleted CNV
4	143225796	143343102	chr4:143225796-143343102	Deleted CNV
4	143346735	143391339	chr4:143346735-143391339	Deleted CNV
4	147654612	147906633	chr4:147654612-147906633	Deleted CNV
4	148229802	148465569	chr4:148229802-148465569	Deleted CNV
4	151915785	152038026	chr4:151915785-152038026	Deleted CNV
4	158710881	158779677	chr4:158710881-158779677	Deleted CNV
4	165672612	165815013	chr4:165672612-165815013	Deleted CNV
4	170214240	170648205	chr4:170214240-170648205	Deleted CNV
4	173863662	174066627	chr4:173863662-174066627	Deleted CNV
4	175108899	175243404	chr4:175108899-175243404	Deleted CNV
4	175365099	175568232	chr4:175365099-175568232	Deleted CNV
5	11294871	11401593	chr5:11294871-11401593	Deleted CNV
5	37727655	37759701	chr5:37727655-37759701	Deleted CNV
5	37796976	37858464	chr5:37796976-37858464	Deleted CNV
5	40092717	40303011	chr5:40092717-40303011	Deleted CNV
5	40324368	40324389	chr5:40324368-40324389	Deleted CNV
5	42296688	42421953	chr5:42296688-42421953	Deleted CNV
5	42629223	42818265	chr5:42629223-42818265	Deleted CNV
5	44420271	44562084	chr5:44420271-44562084	Deleted CNV
5	45639804	45775632	chr5:45639804-45775632	Deleted CNV
5	50243424	50265495	chr5:50243424-50265495	Deleted CNV
5	54322359	54329625	chr5:54322359-54329625	Deleted CNV
5	54358101	54385296	chr5:54358101-54385296	Deleted CNV
5	54458355	54474420	chr5:54458355-54474420	Deleted CNV
5	54515244	54530091	chr5:54515244-54530091	Deleted CNV
5	54787425	54982557	chr5:54787425-54982557	Deleted CNV
5	55567680	55617387	chr5:55567680-55617387	Deleted CNV
5	56400393	56467278	chr5:56400393-56467278	Deleted CNV
5	60900630	60959472	chr5:60900630-60959472	Deleted CNV
5	61146813	61323339	chr5:61146813-61323339	Deleted CNV
5	64349313	64428231	chr5:64349313-64428231	Deleted CNV
5	64503033	64503054	chr5:64503033-64503054	Deleted CNV
5	64604001	64775193	chr5:64604001-64775193	Deleted CNV
5	64900983	64961190	chr5:64900983-64961190	Deleted CNV
5	64987545	65058987	chr5:64987545-65058987	Deleted CNV
5	67546857	67953984	chr5:67546857-67953984	Deleted CNV
5	71510397	71608110	chr5:71510397-71608110	Deleted CNV
5	71829744	72030420	chr5:71829744-72030420	Deleted CNV
5	72030441	72207639	chr5:72030441-72207639	Deleted CNV
5	73994151	74023761	chr5:73994151-74023761	Deleted CNV
5	74114628	74133486	chr5:74114628-74133486	Deleted CNV
5	74624172	74792718	chr5:74624172-74792718	Deleted CNV
5	74956518	75118071	chr5:74956518-75118071	Deleted CNV
5	75568059	75601176	chr5:75568059-75601176	Deleted CNV
5	77656341	78227898	chr5:77656341-78227898	Deleted CNV
5	79181781	79500057	chr5:79181781-79500057	Deleted CNV
5	79521687	79645482	chr5:79521687-79645482	Deleted CNV
5	79976778	80034150	chr5:79976778-80034150	Deleted CNV
5	82697748	82777233	chr5:82697748-82777233	Deleted CNV
5	83313132	83682858	chr5:83313132-83682858	Deleted CNV
5	86444967	86563470	chr5:86444967-86563470	Deleted CNV
5	87021354	87060645	chr5:87021354-87060645	Deleted CNV
5	87882690	87975510	chr5:87882690-87975510	Deleted CNV
5	89311719	89528313	chr5:89311719-89528313	Deleted CNV
5	89542404	89578965	chr5:89542404-89578965	Deleted CNV
5	89630079	89719476	chr5:89630079-89719476	Deleted CNV
5	91760697	91988337	chr5:91760697-91988337	Deleted CNV
5	92888754	92931195	chr5:92888754-92931195	Deleted CNV
5	98187495	98363622	chr5:98187495-98363622	Deleted CNV
5	111480894	111506367	chr5:111480894-111506367	Deleted CNV
5	116546598	116664177	chr5:116546598-116664177	Deleted CNV
5	121639980	121719906	chr5:121639980-121719906	Deleted CNV
5	127513932	127650222	chr5:127513932-127650222	Deleted CNV
5	131407794	131425056	chr5:131407794-131425056	Deleted CNV
5	131734365	131872041	chr5:131734365-131872041	Deleted CNV
5	131892327	131905515	chr5:131892327-131905515	Deleted CNV
5	132205080	132224694	chr5:132205080-132224694	Deleted CNV
5	132253128	132295506	chr5:132253128-132295506	Deleted CNV
5	133833525	133908831	chr5:133833525-133908831	Deleted CNV
5	134555757	134795010	chr5:134555757-134795010	Deleted CNV
5	134807253	134844276	chr5:134807253-134844276	Deleted CNV
5	135594627	135788835	chr5:135594627-135788835	Deleted CNV
5	136024455	136631523	chr5:136024455-136631523	Deleted CNV
5	137001921	137001942	chr5:137001921-137001942	Deleted CNV
5	137044404	137118450	chr5:137044404-137118450	Deleted CNV
5	137204340	137272002	chr5:137204340-137272002	Deleted CNV
5	137666256	137740806	chr5:137666256-137740806	Deleted CNV
5	137959500	137974599	chr5:137959500-137974599	Deleted CNV
5	138855759	138865398	chr5:138855759-138865398	Deleted CNV
5	139002948	139136487	chr5:139002948-139136487	Deleted CNV
5	139405896	139516629	chr5:139405896-139516629	Deleted CNV
5	139713000	139859622	chr5:139713000-139859622	Deleted CNV
5	141960483	141988371	chr5:141960483-141988371	Deleted CNV
5	142079238	142154754	chr5:142079238-142154754	Deleted CNV
5	142784565	142787043	chr5:142784565-142787043	Deleted CNV
5	142799748	142861782	chr5:142799748-142861782	Deleted CNV
5	143008341	143248833	chr5:143008341-143248833	Deleted CNV
5	143589495	143856993	chr5:143589495-143856993	Deleted CNV
5	145225710	145245807	chr5:145225710-145245807	Deleted CNV
5	145317984	145673283	chr5:145317984-145673283	Deleted CNV
5	151004805	151312266	chr5:151004805-151312266	Deleted CNV
5	153105855	153496707	chr5:153105855-153496707	Deleted CNV
5	170164365	170217222	chr5:170164365-170217222	Deleted CNV
5	170230641	170248533	chr5:170230641-170248533	Deleted CNV
5	170753436	170783613	chr5:170753436-170783613	Deleted CNV
5	170797179	170818935	chr5:170797179-170818935	Deleted CNV
6	8208144	8337798	chr6:8208144-8337798	Deleted CNV
6	28412685	28438116	chr6:28412685-28438116	Deleted CNV
6	28592298	28729533	chr6:28592298-28729533	Deleted CNV
6	28830522	28915383	chr6:28830522-28915383	Deleted CNV
6	28964859	28965636	chr6:28964859-28965636	Deleted CNV
6	29383662	29512896	chr6:29383662-29512896	Deleted CNV
6	29828778	29830731	chr6:29828778-29830731	Deleted CNV
6	29942283	30071811	chr6:29942283-30071811	Deleted CNV
6	30112971	30133131	chr6:30112971-30133131	Deleted CNV
6	30188928	30389457	chr6:30188928-30389457	Deleted CNV
6	32676987	32691183	chr6:32676987-32691183	Deleted CNV
6	34195686	34337856	chr6:34195686-34337856	Deleted CNV
6	35079555	35149947	chr6:35079555-35149947	Deleted CNV
6	44289021	44582433	chr6:44289021-44582433	Deleted CNV
6	48009801	48476505	chr6:48009801-48476505	Deleted CNV
6	48979392	49048041	chr6:48979392-49048041	Deleted CNV
6	49713405	49880166	chr6:49713405-49880166	Deleted CNV
6	51198903	51303231	chr6:51198903-51303231	Deleted CNV
6	51763320	52043670	chr6:51763320-52043670	Deleted CNV
6	63317352	63333228	chr6:63317352-63333228	Deleted CNV
6	69202266	69323520	chr6:69202266-69323520	Deleted CNV
6	71420181	71501892	chr6:71420181-71501892	Deleted CNV
6	73020822	73060386	chr6:73020822-73060386	Deleted CNV
6	76189344	76196421	chr6:76189344-76196421	Deleted CNV
6	82190556	82391421	chr6:82190556-82391421	Deleted CNV
6	83758752	83966358	chr6:83758752-83966358	Deleted CNV
6	84268569	84285222	chr6:84268569-84285222	Deleted CNV
6	87166590	87234651	chr6:87166590-87234651	Deleted CNV
6	87683841	87744993	chr6:87683841-87744993	Deleted CNV
6	88709124	88844049	chr6:88709124-88844049	Deleted CNV
6	89112114	89195589	chr6:89112114-89195589	Deleted CNV
6	93621192	93758448	chr6:93621192-93758448	Deleted CNV
6	102518367	102602451	chr6:102518367-102602451	Deleted CNV
6	105508074	105654780	chr6:105508074-105654780	Deleted CNV
6	105696549	105962472	chr6:105696549-105962472	Deleted CNV
6	110700555	110755470	chr6:110700555-110755470	Deleted CNV
6	110924982	110927670	chr6:110924982-110927670	Deleted CNV
6	110934978	111336561	chr6:110934978-111336561	Deleted CNV
6	112450548	112607229	chr6:112450548-112607229	Deleted CNV
6	112644252	112650510	chr6:112644252-112650510	Deleted CNV
6	114000705	114137709	chr6:114000705-114137709	Deleted CNV
6	114448761	114588474	chr6:114448761-114588474	Deleted CNV
6	116801328	116881695	chr6:116801328-116881695	Deleted CNV
6	116941923	117030858	chr6:116941923-117030858	Deleted CNV
6	117358248	117387879	chr6:117358248-117387879	Deleted CNV
6	118712454	118992342	chr6:118712454-118992342	Deleted CNV
6	121786560	122135076	chr6:121786560-122135076	Deleted CNV
6	125443206	125624058	chr6:125443206-125624058	Deleted CNV
6	125640795	126088452	chr6:125640795-126088452	Deleted CNV
6	130691715	130810491	chr6:130691715-130810491	Deleted CNV
6	133287294	133603659	chr6:133287294-133603659	Deleted CNV
6	133798770	133831320	chr6:133798770-133831320	Deleted CNV
6	139252575	139743807	chr6:139252575-139743807	Deleted CNV
6	145663560	145713225	chr6:145663560-145713225	Deleted CNV
6	147026187	147145089	chr6:147026187-147145089	Deleted CNV
6	152989158	153321504	chr6:152989158-153321504	Deleted CNV
7	6421821	6451095	chr7:6421821-6451095	Deleted CNV
7	38728767	39388524	chr7:38728767-39388524	Deleted CNV
7	43905729	44220666	chr7:43905729-44220666	Deleted CNV
7	44223249	44223270	chr7:44223249-44223270	Deleted CNV
7	49894173	50261715	chr7:49894173-50261715	Deleted CNV
7	75241383	75262887	chr7:75241383-75262887	Deleted CNV
7	75400227	75442626	chr7:75400227-75442626	Deleted CNV
7	83797350	83872614	chr7:83797350-83872614	Deleted CNV
7	91476525	91566384	chr7:91476525-91566384	Deleted CNV
7	91754040	91876302	chr7:91754040-91876302	Deleted CNV
7	91930230	92035524	chr7:91930230-92035524	Deleted CNV
7	92940162	92988336	chr7:92940162-92988336	Deleted CNV
7	94104696	94497312	chr7:94104696-94497312	Deleted CNV
7	98820540	98835366	chr7:98820540-98835366	Deleted CNV
7	99613584	99947673	chr7:99613584-99947673	Deleted CNV
7	101955777	102041478	chr7:101955777-102041478	Deleted CNV
7	103183437	103200237	chr7:103183437-103200237	Deleted CNV
7	105666708	106204812	chr7:105666708-106204812	Deleted CNV
7	127205211	127815198	chr7:127205211-127815198	Deleted CNV
7	127909698	128007621	chr7:127909698-128007621	Deleted CNV
7	128079000	128608809	chr7:128079000-128608809	Deleted CNV
7	128754969	128869062	chr7:128754969-128869062	Deleted CNV
7	129051132	129582285	chr7:129051132-129582285	Deleted CNV
7	140228991	140254611	chr7:140228991-140254611	Deleted CNV
7	140304318	140365302	chr7:140304318-140365302	Deleted CNV
7	143028459	143058888	chr7:143028459-143058888	Deleted CNV
7	149832585	149832606	chr7:149832585-149832606	Deleted CNV
7	152173770	152314092	chr7:152173770-152314092	Deleted CNV
8	17846997	17864406	chr8:17846997-17864406	Deleted CNV
8	17872365	17886666	chr8:17872365-17886666	Deleted CNV
8	17897754	17945487	chr8:17897754-17945487	Deleted CNV
8	18549993	18620616	chr8:18549993-18620616	Deleted CNV
8	25241118	25318629	chr8:25241118-25318629	Deleted CNV
8	27727140	27760488	chr8:27727140-27760488	Deleted CNV
8	28177926	28177947	chr8:28177926-28177947	Deleted CNV
8	28279356	28279377	chr8:28279356-28279377	Deleted CNV
8	30610650	30744147	chr8:30610650-30744147	Deleted CNV
8	31371039	31565793	chr8:31371039-31565793	Deleted CNV
8	33350163	33423453	chr8:33350163-33423453	Deleted CNV
8	33423474	33488784	chr8:33423474-33488784	Deleted CNV
8	33574065	33667998	chr8:33574065-33667998	Deleted CNV
8	33668019	33724236	chr8:33668019-33724236	Deleted CNV
8	36627465	36772260	chr8:36627465-36772260	Deleted CNV
8	36836625	36985179	chr8:36836625-36985179	Deleted CNV
8	37325841	37366203	chr8:37325841-37366203	Deleted CNV
8	37477650	37659237	chr8:37477650-37659237	Deleted CNV
8	37670283	37718331	chr8:37670283-37718331	Deleted CNV
8	37730448	37734480	chr8:37730448-37734480	Deleted CNV
8	37808106	37836456	chr8:37808106-37836456	Deleted CNV
8	37907898	38000907	chr8:37907898-38000907	Deleted CNV
8	38243793	38285121	chr8:38243793-38285121	Deleted CNV
8	41365632	41381571	chr8:41365632-41381571	Deleted CNV
8	41536194	41544489	chr8:41536194-41544489	Deleted CNV
8	41626662	41655705	chr8:41626662-41655705	Deleted CNV
8	41919696	41921145	chr8:41919696-41921145	Deleted CNV
8	42080262	42103257	chr8:42080262-42103257	Deleted CNV
8	42349251	42458955	chr8:42349251-42458955	Deleted CNV
8	42567252	42570507	chr8:42567252-42570507	Deleted CNV
8	42851403	42864696	chr8:42851403-42864696	Deleted CNV
8	49182861	49201677	chr8:49182861-49201677	Deleted CNV
8	49212471	49282569	chr8:49212471-49282569	Deleted CNV
8	49282590	49616364	chr8:49282590-49616364	Deleted CNV
8	49816053	49874223	chr8:49816053-49874223	Deleted CNV
8	56992803	57074703	chr8:56992803-57074703	Deleted CNV
8	61058403	61063422	chr8:61058403-61063422	Deleted CNV
8	64076481	64232910	chr8:64076481-64232910	Deleted CNV
8	64256241	64324953	chr8:64256241-64324953	Deleted CNV
8	65667105	65776284	chr8:65667105-65776284	Deleted CNV
8	66635541	66839283	chr8:66635541-66839283	Deleted CNV
8	68030361	68294184	chr8:68030361-68294184	Deleted CNV
8	74062611	74279772	chr8:74062611-74279772	Deleted CNV
8	76410537	76451172	chr8:76410537-76451172	Deleted CNV
8	77596596	77632653	chr8:77596596-77632653	Deleted CNV
8	77853216	77882511	chr8:77853216-77882511	Deleted CNV
8	77895426	78004143	chr8:77895426-78004143	Deleted CNV
8	85143324	85209243	chr8:85143324-85209243	Deleted CNV
8	85210734	85210986	chr8:85210734-85210986	Deleted CNV
8	85615257	85636887	chr8:85615257-85636887	Deleted CNV
8	90877122	90950622	chr8:90877122-90950622	Deleted CNV
8	90957489	91035315	chr8:90957489-91035315	Deleted CNV
8	91067214	91172424	chr8:91067214-91172424	Deleted CNV
8	91794024	91794360	chr8:91794024-91794360	Deleted CNV
8	91799904	91812588	chr8:91799904-91812588	Deleted CNV
8	99403101	99413475	chr8:99403101-99413475	Deleted CNV
8	100835322	100937466	chr8:100835322-100937466	Deleted CNV
8	101109456	101167206	chr8:101109456-101167206	Deleted CNV
8	101398815	101578953	chr8:101398815-101578953	Deleted CNV
8	104089104	104200173	chr8:104089104-104200173	Deleted CNV
8	104232849	104289297	chr8:104232849-104289297	Deleted CNV
8	106076670	106405236	chr8:106076670-106405236	Deleted CNV
8	106445199	106907241	chr8:106445199-106907241	Deleted CNV
8	107137695	107236122	chr8:107137695-107236122	Deleted CNV
8	108900393	109110876	chr8:108900393-109110876	Deleted CNV
8	110085507	110127927	chr8:110085507-110127927	Deleted CNV
8	117309360	117335799	chr8:117309360-117335799	Deleted CNV
8	120225630	120276618	chr8:120225630-120276618	Deleted CNV
8	120414567	120631371	chr8:120414567-120631371	Deleted CNV
8	126434427	126551586	chr8:126434427-126551586	Deleted CNV
8	128798817	128831472	chr8:128798817-128831472	Deleted CNV
8	129312372	129458301	chr8:129312372-129458301	Deleted CNV
8	130712106	130836846	chr8:130712106-130836846	Deleted CNV
8	133429359	133490049	chr8:133429359-133490049	Deleted CNV
8	139355790	139465872	chr8:139355790-139465872	Deleted CNV
8	141522108	141577800	chr8:141522108-141577800	Deleted CNV
8	141965964	141988161	chr8:141965964-141988161	Deleted CNV
8	142113405	142143099	chr8:142113405-142143099	Deleted CNV
8	142174452	142254063	chr8:142174452-142254063	Deleted CNV
8	144985596	145032258	chr8:144985596-145032258	Deleted CNV
9	34113660	34283550	chr9:34113660-34283550	Deleted CNV
9	34350582	34508082	chr9:34350582-34508082	Deleted CNV
9	34701702	34777680	chr9:34701702-34777680	Deleted CNV
9	34980876	35115780	chr9:34980876-35115780	Deleted CNV
9	36849708	37005255	chr9:36849708-37005255	Deleted CNV
9	80143707	80298120	chr9:80143707-80298120	Deleted CNV
9	80786874	80838828	chr9:80786874-80838828	Deleted CNV
9	94787637	94811325	chr9:94787637-94811325	Deleted CNV
9	94827306	94905237	chr9:94827306-94905237	Deleted CNV
9	95809539	96466209	chr9:95809539-96466209	Deleted CNV
9	98138796	98162190	chr9:98138796-98162190	Deleted CNV
9	127554567	127652070	chr9:127554567-127652070	Deleted CNV
9	127722609	127948842	chr9:127722609-127948842	Deleted CNV
9	128576847	128690268	chr9:128576847-128690268	Deleted CNV
9	128755011	128811648	chr9:128755011-128811648	Deleted CNV
9	133581882	133618443	chr9:133581882-133618443	Deleted CNV
9	134006523	134123157	chr9:134006523-134123157	Deleted CNV
9	138811428	138852063	chr9:138811428-138852063	Deleted CNV
9	141054459	141153432	chr9:141054459-141153432	Deleted CNV
2	201623373	201623394	chr2:201623373-201623394	Somatic
3	180350940	180350961	chr3:180350940-180350961	Somatic
6	123960207	123960228	chr6:123960207-123960228	Somatic
9	100710561	100710582	chr9:100710561-100710582	Somatic
11	60151203	60151224	chr11:60151203-60151224	Somatic
11	67474197	67474218	chr11:67474197-67474218	Somatic
15	24407985	24408006	chr15:24407985-24408006	Somatic
16	29110452	29110473	chr16:29110452-29110473	Somatic
16	32482044	32482065	chr16:32482044-32482065	Somatic
17	66883278	66883299	chr17:66883278-66883299	Somatic
19	22924104	22924125	chr19:22924104-22924125	Somatic
20	36618960	36618981	chr20:36618960-36618981	Somatic
22	39114600	39114621	chr22:39114600-39114621	Somatic
22	42538860	42538881	chr22:42538860-42538881	Somatic

## Sheet: SupplementartTable5b
SupplementaryTable5b: List of potential regulatory variants in PC3 cell line.
Chr	Start	End	ID	Type
8	128103937	128103937	rs1456315	SNP
8	128103969	128103969	rs72725879	SNP
8	128104055	128104055	rs7463708	SNP
1	204470129	204470129	rs10900594	SNP
1	204477977	204477977	rs11240754	SNP
1	204478649	204478649	rs11240755	SNP
1	204522018	204522018	rs56200417	SNP
1	204522457	204522457	rs10900596	SNP
1	204527060	204527060	rs1046874	SNP
1	204527379	204527379	rs1460036	SNP
1	204528344	204528344	rs16853958	SNP
1	204550366	204550366	rs5010868	SNP
12	49673158	49673158	rs11168963	SNP
12	53266739	53266739	rs73106451	SNP
12	53267309	53267309	rs56207534	SNP
12	53268073	53268073	rs147181250	SNP
12	53298775	53298775	rs137898974	SNP
12	53308932	53308932	rs113925811	SNP
12	53309584	53309584	rs4919743	SNP
17	47390136	47390136	rs11654557	SNP
17	47405338	47405338	rs73324308	SNP
17	47407342	47407342	rs9891264	SNP
17	47439989	47439989	rs36102386	SNP
17	47445346	47445346	rs142415707	SNP
17	47446968	47446968	rs79768864	SNP
17	47447836	47447836	rs118099826	SNP
17	47447950	47447950	rs117801358	SNP
17	47448970	47448970	rs77488129	SNP
17	47449193	47449193	rs11650886	SNP
17	47455752	47455752	rs73324348	SNP
17	47456064	47456064	rs8065389	SNP
17	47456754	47456754	rs11650001	SNP
17	47457977	47457977	rs146060597	SNP
17	568153	568153	rs865702	SNP
2	173295405	173295405	rs12053442	SNP
2	173296252	173296252	rs76264695	SNP
2	173299266	173299266	rs75979419	SNP
2	173362046	173362046	rs79474289	SNP
2	242292307	242292307	rs1056801	SNP
2	242294301	242294301	rs62193197	SNP
2	242352257	242352257	rs60604866	SNP
2	242352582	242352582	rs3815262	SNP
2	242354632	242354632	rs62193221	SNP
2	242399863	242399863	rs2010169	SNP
2	85783128	85783128	rs6738645	SNP
5	172939426	172939426	rs6869841	SNP
5	172939755	172939755	rs6891752	SNP
6	31115711	31115711	rs1265068	SNP
6	31118511	31118511	rs130067	SNP
7	97825188	97825188	rs11764933	SNP
7	97826340	97826340	rs2132276	SNP
8	95934888	96071997	chr8:95934888-96071997	Duplicated CNV
8	127541694	127580670	chr8:127541694-127580670	Duplicated CNV
8	86131710	86208801	chr8:86131710-86208801	Duplicated CNV
8	90766116	90940206	chr8:90766116-90940206	Duplicated CNV
8	95671128	95929848	chr8:95671128-95929848	Duplicated CNV
8	101639580	101671206	chr8:101639580-101671206	Duplicated CNV
9	140114121	140141799	chr9:140114121-140141799	Duplicated CNV
8	110868450	110924562	chr8:110868450-110924562	Duplicated CNV
8	91062804	91199535	chr8:91062804-91199535	Duplicated CNV
8	93659286	93690723	chr8:93659286-93690723	Duplicated CNV
8	121131150	121148286	chr8:121131150-121148286	Duplicated CNV
3	172374048	172393956	chr3:172374048-172393956	Duplicated CNV
8	66948504	66954615	chr8:66948504-66954615	Duplicated CNV
3	128894220	129091578	chr3:128894220-129091578	Duplicated CNV
3	146884374	147286692	chr3:146884374-147286692	Duplicated CNV
3	149997666	150176313	chr3:149997666-150176313	Duplicated CNV
3	154876995	155029686	chr3:154876995-155029686	Duplicated CNV
3	169339821	169379847	chr3:169339821-169379847	Duplicated CNV
1	154518231	154711095	chr1:154518231-154711095	Duplicated CNV
8	66678318	66946068	chr8:66678318-66946068	Duplicated CNV
1	154167993	154212975	chr1:154167993-154212975	Duplicated CNV
1	154711221	154866873	chr1:154711221-154866873	Duplicated CNV
1	154905975	155031387	chr1:154905975-155031387	Duplicated CNV
8	139405392	139579419	chr8:139405392-139579419	Duplicated CNV
8	140604156	140604177	chr8:140604156-140604177	Duplicated CNV
8	140626017	140661297	chr8:140626017-140661297	Duplicated CNV
1	154049784	154057785	chr1:154049784-154057785	Duplicated CNV
3	115745616	116080545	chr3:115745616-116080545	Duplicated CNV
3	170720487	171041535	chr3:170720487-171041535	Duplicated CNV
3	178323327	178643682	chr3:178323327-178643682	Duplicated CNV
3	113850198	113973720	chr3:113850198-113973720	Duplicated CNV
3	185645880	185875977	chr3:185645880-185875977	Duplicated CNV
7	123126906	123573156	chr7:123126906-123573156	Duplicated CNV
3	187655328	187758816	chr3:187655328-187758816	Duplicated CNV
3	187466475	187540122	chr3:187466475-187540122	Duplicated CNV
7	97931337	98122668	chr7:97931337-98122668	Duplicated CNV
7	116321436	116324628	chr7:116321436-116324628	Duplicated CNV
7	151209576	151225053	chr7:151209576-151225053	Duplicated CNV
1	156018492	156023112	chr1:156018492-156023112	Duplicated CNV
1	156160137	156191973	chr1:156160137-156191973	Duplicated CNV
1	203737212	203965881	chr1:203737212-203965881	Duplicated CNV
3	193457859	193771473	chr3:193457859-193771473	Duplicated CNV
1	156397038	156473940	chr1:156397038-156473940	Duplicated CNV
3	33657981	33919977	chr3:33657981-33919977	Duplicated CNV
5	6657987	6816180	chr5:6657987-6816180	Duplicated CNV
6	40748463	41299041	chr6:40748463-41299041	Duplicated CNV
6	41518827	41624562	chr6:41518827-41624562	Duplicated CNV
1	169473024	169705410	chr1:169473024-169705410	Duplicated CNV
1	205570407	205636326	chr1:205570407-205636326	Duplicated CNV
17	60860037	61053363	chr17:60860037-61053363	Duplicated CNV
11	69475308	69480369	chr11:69475308-69480369	Duplicated CNV
9	117803616	117826107	chr9:117803616-117826107	Duplicated CNV
17	46626321	46668867	chr17:46626321-46668867	Duplicated CNV
17	46686801	46716411	chr17:46686801-46716411	Duplicated CNV
17	55929321	56745507	chr17:55929321-56745507	Duplicated CNV
17	65367204	65441712	chr17:65367204-65441712	Duplicated CNV
17	71226771	71233638	chr17:71226771-71233638	Duplicated CNV
3	40638948	41155359	chr3:40638948-41155359	Duplicated CNV
5	6574911	6654396	chr5:6574911-6654396	Duplicated CNV
5	147588147	147869190	chr5:147588147-147869190	Duplicated CNV
5	148133958	148608474	chr5:148133958-148608474	Duplicated CNV
5	158639607	158702439	chr5:158639607-158702439	Duplicated CNV
5	175047663	175047957	chr5:175047663-175047957	Duplicated CNV
6	14038248	14044548	chr6:14038248-14044548	Duplicated CNV
9	117837258	117964245	chr9:117837258-117964245	Duplicated CNV
1	209367270	209516412	chr1:209367270-209516412	Duplicated CNV
3	14896392	15075312	chr3:14896392-15075312	Duplicated CNV
3	16417023	16680615	chr3:16417023-16680615	Duplicated CNV
3	52333659	52388385	chr3:52333659-52388385	Duplicated CNV
17	48720714	48722373	chr17:48720714-48722373	Duplicated CNV
17	54572889	55923462	chr17:54572889-55923462	Duplicated CNV
3	49013286	49055790	chr3:49013286-49055790	Duplicated CNV
3	62557110	62805918	chr3:62557110-62805918	Duplicated CNV
5	7591248	7662543	chr5:7591248-7662543	Duplicated CNV
5	165880701	167414331	chr5:165880701-167414331	Duplicated CNV
10	61387263	62099814	chr10:61387263-62099814	Duplicated CNV
10	63841113	63893361	chr10:63841113-63893361	Duplicated CNV
10	64679496	65633232	chr10:64679496-65633232	Duplicated CNV
17	76821276	76825434	chr17:76821276-76825434	Duplicated CNV
19	33781692	33787278	chr19:33781692-33787278	Duplicated CNV
19	40733553	40743801	chr19:40733553-40743801	Duplicated CNV
6	30573858	30590994	chr6:30573858-30590994	Duplicated CNV
14	35866425	35880705	chr14:35866425-35880705	Duplicated CNV
14	48730563	48978111	chr14:48730563-48978111	Duplicated CNV
1	226611840	227312085	chr1:226611840-227312085	Duplicated CNV
11	66571113	67261971	chr11:66571113-67261971	Duplicated CNV
1	36681456	37025247	chr1:36681456-37025247	Duplicated CNV
2	192640623	192662610	chr2:192640623-192662610	Duplicated CNV
14	38081883	38102148	chr14:38081883-38102148	Duplicated CNV
14	68783274	68942055	chr14:68783274-68942055	Duplicated CNV
17	38242071	38250786	chr17:38242071-38250786	Duplicated CNV
17	43072911	43244040	chr17:43072911-43244040	Duplicated CNV
19	42906087	42924168	chr19:42906087-42924168	Duplicated CNV
8	37836435	37960188	chr8:37836435-37960188	Duplicated CNV
8	41381592	41536173	chr8:41381592-41536173	Duplicated CNV
8	41909343	42080262	chr8:41909343-42080262	Duplicated CNV
10	77927430	78953364	chr10:77927430-78953364	Duplicated CNV
11	56941185	57437562	chr11:56941185-57437562	Duplicated CNV
11	76544076	76638219	chr11:76544076-76638219	Duplicated CNV
2	11597166	11757081	chr2:11597166-11757081	Duplicated CNV
3	70812000	71020509	chr3:70812000-71020509	Duplicated CNV
6	149175138	149587179	chr6:149175138-149587179	Duplicated CNV
11	125526030	126041706	chr11:125526030-126041706	Duplicated CNV
2	9821994	9822120	chr2:9821994-9822120	Duplicated CNV
2	16089507	16089780	chr2:16089507-16089780	Duplicated CNV
2	171674706	171679641	chr2:171674706-171679641	Duplicated CNV
11	12161457	12163473	chr11:12161457-12163473	Duplicated CNV
3	72606933	72863826	chr3:72606933-72863826	Duplicated CNV
11	57446277	57934611	chr11:57446277-57934611	Duplicated CNV
11	57935472	57989022	chr11:57935472-57989022	Duplicated CNV
19	51314025	51449664	chr19:51314025-51449664	Duplicated CNV
2	21060774	21525168	chr2:21060774-21525168	Duplicated CNV
2	171668952	171670107	chr2:171668952-171670107	Duplicated CNV
10	17554152	17659131	chr10:17554152-17659131	Duplicated CNV
2	15725073	15846831	chr2:15725073-15846831	Duplicated CNV
2	16093686	16408707	chr2:16093686-16408707	Duplicated CNV
22	31200057	31269588	chr22:31200057-31269588	Duplicated CNV
3	71074206	71130276	chr3:71074206-71130276	Duplicated CNV
2	26960619	27303444	chr2:26960619-27303444	Duplicated CNV
10	104592243	104667423	chr10:104592243-104667423	Duplicated CNV
10	111962088	111977208	chr10:111962088-111977208	Duplicated CNV
2	128259411	128290113	chr2:128259411-128290113	Duplicated CNV
19	36155343	36569001	chr19:36155343-36569001	Duplicated CNV
16	90018831	90020595	chr16:90018831-90020595	Duplicated CNV
2	31352727	31369506	chr2:31352727-31369506	Duplicated CNV
2	55017543	55098477	chr2:55017543-55098477	Duplicated CNV
2	101568957	101624208	chr2:101568957-101624208	Duplicated CNV
2	103268508	103524939	chr2:103268508-103524939	Duplicated CNV
2	128201703	128256870	chr2:128201703-128256870	Duplicated CNV
2	174810909	175379421	chr2:174810909-175379421	Duplicated CNV
1	28210665	28319487	chr1:28210665-28319487	Duplicated CNV
16	79724631	79803906	chr16:79724631-79803906	Duplicated CNV
19	45579303	45823512	chr19:45579303-45823512	Duplicated CNV
2	70175343	70211946	chr2:70175343-70211946	Duplicated CNV
1	863520	878703	chr1:863520-878703	Deleted CNV
1	903315	936117	chr1:903315-936117	Deleted CNV
1	1821414	2093616	chr1:1821414-2093616	Deleted CNV
1	2097459	2159976	chr1:2097459-2159976	Deleted CNV
1	2531235	2560467	chr1:2531235-2560467	Deleted CNV
1	6266820	6333369	chr1:6266820-6333369	Deleted CNV
1	9697884	9713361	chr1:9697884-9713361	Deleted CNV
1	9953979	9954000	chr1:9953979-9954000	Deleted CNV
1	10822791	10896375	chr1:10822791-10896375	Deleted CNV
1	11066874	11106858	chr1:11066874-11106858	Deleted CNV
1	11181702	11266395	chr1:11181702-11266395	Deleted CNV
1	11269545	11270847	chr1:11269545-11270847	Deleted CNV
1	11975229	12064857	chr1:11975229-12064857	Deleted CNV
1	12355455	12605943	chr1:12355455-12605943	Deleted CNV
1	20878746	20939247	chr1:20878746-20939247	Deleted CNV
1	21566370	21627144	chr1:21566370-21627144	Deleted CNV
1	21748860	21790839	chr1:21748860-21790839	Deleted CNV
1	23520063	23676723	chr1:23520063-23676723	Deleted CNV
1	23692095	23695707	chr1:23692095-23695707	Deleted CNV
1	23695728	23793651	chr1:23695728-23793651	Deleted CNV
1	23829372	24249666	chr1:23829372-24249666	Deleted CNV
1	24394188	24513867	chr1:24394188-24513867	Deleted CNV
1	26836887	26904549	chr1:26836887-26904549	Deleted CNV
1	27435765	27549984	chr1:27435765-27549984	Deleted CNV
1	27698307	27744360	chr1:27698307-27744360	Deleted CNV
1	27895791	27956796	chr1:27895791-27956796	Deleted CNV
1	28147035	28194159	chr1:28147035-28194159	Deleted CNV
1	28400232	28430052	chr1:28400232-28430052	Deleted CNV
1	28431102	28432215	chr1:28431102-28432215	Deleted CNV
1	28493913	28553406	chr1:28493913-28553406	Deleted CNV
1	29188173	29188845	chr1:29188173-29188845	Deleted CNV
1	32197053	32255622	chr1:32197053-32255622	Deleted CNV
1	33905424	34059102	chr1:33905424-34059102	Deleted CNV
1	35292075	35318472	chr1:35292075-35318472	Deleted CNV
1	35401989	35632506	chr1:35401989-35632506	Deleted CNV
1	36807624	36832929	chr1:36807624-36832929	Deleted CNV
1	38453037	39049941	chr1:38453037-39049941	Deleted CNV
1	40448877	40980660	chr1:40448877-40980660	Deleted CNV
1	41179572	41836788	chr1:41179572-41836788	Deleted CNV
1	41898654	41953044	chr1:41898654-41953044	Deleted CNV
1	41998425	42264579	chr1:41998425-42264579	Deleted CNV
1	42325143	42554064	chr1:42325143-42554064	Deleted CNV
1	42731283	42944559	chr1:42731283-42944559	Deleted CNV
1	43693272	43762866	chr1:43693272-43762866	Deleted CNV
1	43771980	43825194	chr1:43771980-43825194	Deleted CNV
1	44304036	44385453	chr1:44304036-44385453	Deleted CNV
1	45798396	45801861	chr1:45798396-45801861	Deleted CNV
1	45803373	45808665	chr1:45803373-45808665	Deleted CNV
1	46092207	46155774	chr1:46092207-46155774	Deleted CNV
1	46882332	46899258	chr1:46882332-46899258	Deleted CNV
1	47930337	48178914	chr1:47930337-48178914	Deleted CNV
1	52020822	52243989	chr1:52020822-52243989	Deleted CNV
1	52774344	53015949	chr1:52774344-53015949	Deleted CNV
1	59244108	59260971	chr1:59244108-59260971	Deleted CNV
1	60210801	60366915	chr1:60210801-60366915	Deleted CNV
1	60378171	60587289	chr1:60378171-60587289	Deleted CNV
1	63207417	63605346	chr1:63207417-63605346	Deleted CNV
1	63822927	63852579	chr1:63822927-63852579	Deleted CNV
1	64677249	64779645	chr1:64677249-64779645	Deleted CNV
1	65044140	65062620	chr1:65044140-65062620	Deleted CNV
1	65335305	65363508	chr1:65335305-65363508	Deleted CNV
1	68255061	68420079	chr1:68255061-68420079	Deleted CNV
1	68528859	68904381	chr1:68528859-68904381	Deleted CNV
1	70568085	70851900	chr1:70568085-70851900	Deleted CNV
1	75098898	75149256	chr1:75098898-75149256	Deleted CNV
1	75614070	75823125	chr1:75614070-75823125	Deleted CNV
1	85147629	85210776	chr1:85147629-85210776	Deleted CNV
1	89473167	89749842	chr1:89473167-89749842	Deleted CNV
1	92152620	92199597	chr1:92152620-92199597	Deleted CNV
1	94366377	94459533	chr1:94366377-94459533	Deleted CNV
1	95342625	95362743	chr1:95342625-95362743	Deleted CNV
1	95362764	95615520	chr1:95362764-95615520	Deleted CNV
1	99696051	99822849	chr1:99696051-99822849	Deleted CNV
1	103575276	103575297	chr1:103575276-103575297	Deleted CNV
1	110892033	110991342	chr1:110892033-110991342	Deleted CNV
1	115691646	115832010	chr1:115691646-115832010	Deleted CNV
1	115925775	116014941	chr1:115925775-116014941	Deleted CNV
1	117750423	117868779	chr1:117750423-117868779	Deleted CNV
1	120275400	120303120	chr1:120275400-120303120	Deleted CNV
1	120431934	120435504	chr1:120431934-120435504	Deleted CNV
1	149852745	149866248	chr1:149852745-149866248	Deleted CNV
1	149888025	149904636	chr1:149888025-149904636	Deleted CNV
1	150005058	150116211	chr1:150005058-150116211	Deleted CNV
1	150134187	150165225	chr1:150134187-150165225	Deleted CNV
1	150611685	150619812	chr1:150611685-150619812	Deleted CNV
1	151341372	151497297	chr1:151341372-151497297	Deleted CNV
1	153984642	154388136	chr1:153984642-154388136	Deleted CNV
1	154445151	154547253	chr1:154445151-154547253	Deleted CNV
1	155062530	155159865	chr1:155062530-155159865	Deleted CNV
1	155263059	155329734	chr1:155263059-155329734	Deleted CNV
1	155982183	155993124	chr1:155982183-155993124	Deleted CNV
1	155994972	156001293	chr1:155994972-156001293	Deleted CNV
1	156016077	156023133	chr1:156016077-156023133	Deleted CNV
1	156032037	156040626	chr1:156032037-156040626	Deleted CNV
1	156062340	156077334	chr1:156062340-156077334	Deleted CNV
1	156460647	156547881	chr1:156460647-156547881	Deleted CNV
1	156625245	156709707	chr1:156625245-156709707	Deleted CNV
1	156771489	156796122	chr1:156771489-156796122	Deleted CNV
1	164876733	164904936	chr1:164876733-164904936	Deleted CNV
1	165338880	165399801	chr1:165338880-165399801	Deleted CNV
1	166747098	166845924	chr1:166747098-166845924	Deleted CNV
1	171160248	171204516	chr1:171160248-171204516	Deleted CNV
1	171724560	171939894	chr1:171724560-171939894	Deleted CNV
1	173916519	174007008	chr1:173916519-174007008	Deleted CNV
1	177291534	177340569	chr1:177291534-177340569	Deleted CNV
1	178183005	178470075	chr1:178183005-178470075	Deleted CNV
1	182069370	182316183	chr1:182069370-182316183	Deleted CNV
1	183407406	183780639	chr1:183407406-183780639	Deleted CNV
1	204670536	204873858	chr1:204670536-204873858	Deleted CNV
1	211834413	211987692	chr1:211834413-211987692	Deleted CNV
1	212162622	212342718	chr1:212162622-212342718	Deleted CNV
1	212599842	212709882	chr1:212599842-212709882	Deleted CNV
1	212735712	212752911	chr1:212735712-212752911	Deleted CNV
1	212851968	212890482	chr1:212851968-212890482	Deleted CNV
1	213496773	213807363	chr1:213496773-213807363	Deleted CNV
1	213877272	214129146	chr1:213877272-214129146	Deleted CNV
1	214724811	214874016	chr1:214724811-214874016	Deleted CNV
1	215716683	215831742	chr1:215716683-215831742	Deleted CNV
1	220974495	221058621	chr1:220974495-221058621	Deleted CNV
1	224673981	224744226	chr1:224673981-224744226	Deleted CNV
1	224908740	224928942	chr1:224908740-224928942	Deleted CNV
1	225580215	225696555	chr1:225580215-225696555	Deleted CNV
1	225880557	225958887	chr1:225880557-225958887	Deleted CNV
1	226550667	226550688	chr1:226550667-226550688	Deleted CNV
1	229528992	229899432	chr1:229528992-229899432	Deleted CNV
1	231283983	231526197	chr1:231283983-231526197	Deleted CNV
1	232003065	232055775	chr1:232003065-232055775	Deleted CNV
1	233034606	233113167	chr1:233034606-233113167	Deleted CNV
1	233347800	233471889	chr1:233347800-233471889	Deleted CNV
1	235024671	235158945	chr1:235024671-235158945	Deleted CNV
1	237936069	238285656	chr1:237936069-238285656	Deleted CNV
10	7623987	7624743	chr10:7623987-7624743	Deleted CNV
10	15218637	15333381	chr10:15218637-15333381	Deleted CNV
10	33456255	33476310	chr10:33456255-33476310	Deleted CNV
10	35930559	35992257	chr10:35930559-35992257	Deleted CNV
10	43245930	43450302	chr10:43245930-43450302	Deleted CNV
10	64081605	64163505	chr10:64081605-64163505	Deleted CNV
10	69895686	69907089	chr10:69895686-69907089	Deleted CNV
10	69912045	69912066	chr10:69912045-69912066	Deleted CNV
10	75021933	75224352	chr10:75021933-75224352	Deleted CNV
10	76489287	76767117	chr10:76489287-76767117	Deleted CNV
10	76813527	76849164	chr10:76813527-76849164	Deleted CNV
10	77124159	77150619	chr10:77124159-77150619	Deleted CNV
10	77391300	77427630	chr10:77391300-77427630	Deleted CNV
10	78772533	78938769	chr10:78772533-78938769	Deleted CNV
10	79756425	79783242	chr10:79756425-79783242	Deleted CNV
10	88681257	88818639	chr10:88681257-88818639	Deleted CNV
10	89604102	89617290	chr10:89604102-89617290	Deleted CNV
10	102064893	102370590	chr10:102064893-102370590	Deleted CNV
10	103367838	103490667	chr10:103367838-103490667	Deleted CNV
10	104583192	104936958	chr10:104583192-104936958	Deleted CNV
11	9119397	9223221	chr11:9119397-9223221	Deleted CNV
11	27800325	27938211	chr11:27800325-27938211	Deleted CNV
11	31930017	32585679	chr11:31930017-32585679	Deleted CNV
11	33415347	33766488	chr11:33415347-33766488	Deleted CNV
11	43584702	43612464	chr11:43584702-43612464	Deleted CNV
11	46326966	46410945	chr11:46326966-46410945	Deleted CNV
11	47258715	47300295	chr11:47258715-47300295	Deleted CNV
11	47321001	47321505	chr11:47321001-47321505	Deleted CNV
11	47402313	47452335	chr11:47402313-47452335	Deleted CNV
11	47737977	47849613	chr11:47737977-47849613	Deleted CNV
11	47895393	47999490	chr11:47895393-47999490	Deleted CNV
11	48156780	48186201	chr11:48156780-48186201	Deleted CNV
11	49858074	50083047	chr11:49858074-50083047	Deleted CNV
11	56938266	56938287	chr11:56938266-56938287	Deleted CNV
11	57029973	57082914	chr11:57029973-57082914	Deleted CNV
11	57083523	57130584	chr11:57083523-57130584	Deleted CNV
11	57146922	57175587	chr11:57146922-57175587	Deleted CNV
11	57956892	57989526	chr11:57956892-57989526	Deleted CNV
11	65717652	65811774	chr11:65717652-65811774	Deleted CNV
11	66103548	66173877	chr11:66103548-66173877	Deleted CNV
11	66225558	66247335	chr11:66225558-66247335	Deleted CNV
11	66571134	66585876	chr11:66571134-66585876	Deleted CNV
11	66585897	66636759	chr11:66585897-66636759	Deleted CNV
11	66665088	66695958	chr11:66665088-66695958	Deleted CNV
11	66749487	66773406	chr11:66749487-66773406	Deleted CNV
11	67351515	67367412	chr11:67351515-67367412	Deleted CNV
11	69473460	69475287	chr11:69473460-69475287	Deleted CNV
11	69475308	69480369	chr11:69475308-69480369	Deleted CNV
11	73669176	73901310	chr11:73669176-73901310	Deleted CNV
11	76084092	76099800	chr11:76084092-76099800	Deleted CNV
11	77642334	77695758	chr11:77642334-77695758	Deleted CNV
11	85615488	85632099	chr11:85615488-85632099	Deleted CNV
11	101574921	101971863	chr11:101574921-101971863	Deleted CNV
11	103561794	103812828	chr11:103561794-103812828	Deleted CNV
11	107991597	108065958	chr11:107991597-108065958	Deleted CNV
11	108501372	108510801	chr11:108501372-108510801	Deleted CNV
11	109574346	109822083	chr11:109574346-109822083	Deleted CNV
11	111236433	111250587	chr11:111236433-111250587	Deleted CNV
11	111315939	111434442	chr11:111315939-111434442	Deleted CNV
11	113645070	113755740	chr11:113645070-113755740	Deleted CNV
11	113866557	113969100	chr11:113866557-113969100	Deleted CNV
11	117094236	117099948	chr11:117094236-117099948	Deleted CNV
11	118248627	118375383	chr11:118248627-118375383	Deleted CNV
11	118561443	118610688	chr11:118561443-118610688	Deleted CNV
11	118765815	118951644	chr11:118765815-118951644	Deleted CNV
11	121326996	121481451	chr11:121326996-121481451	Deleted CNV
11	122845149	122848992	chr11:122845149-122848992	Deleted CNV
11	125298033	125454189	chr11:125298033-125454189	Deleted CNV
11	126568575	126990612	chr11:126568575-126990612	Deleted CNV
12	14088816	14331387	chr12:14088816-14331387	Deleted CNV
12	26525142	26546163	chr12:26525142-26546163	Deleted CNV
12	26546184	26593791	chr12:26546184-26593791	Deleted CNV
12	26745096	27055161	chr12:26745096-27055161	Deleted CNV
12	27794466	27957678	chr12:27794466-27957678	Deleted CNV
12	31418877	31675728	chr12:31418877-31675728	Deleted CNV
12	50453613	50586480	chr12:50453613-50586480	Deleted CNV
12	50660799	50762901	chr12:50660799-50762901	Deleted CNV
12	51032394	51210579	chr12:51032394-51210579	Deleted CNV
12	51231936	51303105	chr12:51231936-51303105	Deleted CNV
12	57453879	57701889	chr12:57453879-57701889	Deleted CNV
12	58010820	58032429	chr12:58010820-58032429	Deleted CNV
12	58093833	58098264	chr12:58093833-58098264	Deleted CNV
12	58114539	58165821	chr12:58114539-58165821	Deleted CNV
12	58173612	58180752	chr12:58173612-58180752	Deleted CNV
12	58209228	58327542	chr12:58209228-58327542	Deleted CNV
12	58476201	58541301	chr12:58476201-58541301	Deleted CNV
12	65520714	66420858	chr12:65520714-66420858	Deleted CNV
12	106956129	107457882	chr12:106956129-107457882	Deleted CNV
12	107550198	107923641	chr12:107550198-107923641	Deleted CNV
12	108715236	108789723	chr12:108715236-108789723	Deleted CNV
12	110323710	110362266	chr12:110323710-110362266	Deleted CNV
12	110698350	111002787	chr12:110698350-111002787	Deleted CNV
12	111002808	111223287	chr12:111002808-111223287	Deleted CNV
12	111270873	111270894	chr12:111270873-111270894	Deleted CNV
12	111281226	111291138	chr12:111281226-111291138	Deleted CNV
12	111353340	111366738	chr12:111353340-111366738	Deleted CNV
12	111366759	111408003	chr12:111366759-111408003	Deleted CNV
12	111432300	111513003	chr12:111432300-111513003	Deleted CNV
12	112217301	112248171	chr12:112217301-112248171	Deleted CNV
12	112436625	112562562	chr12:112436625-112562562	Deleted CNV
12	116713527	117402075	chr12:116713527-117402075	Deleted CNV
12	117471816	117812940	chr12:117471816-117812940	Deleted CNV
12	122336592	122336613	chr12:122336592-122336613	Deleted CNV
12	124355889	124606839	chr12:124355889-124606839	Deleted CNV
12	132668088	132957405	chr12:132668088-132957405	Deleted CNV
12	133170240	133185801	chr12:133170240-133185801	Deleted CNV
13	31033149	31140879	chr13:31033149-31140879	Deleted CNV
13	31774050	31980879	chr13:31774050-31980879	Deleted CNV
13	34044381	34295142	chr13:34044381-34295142	Deleted CNV
13	41114241	41140008	chr13:41114241-41140008	Deleted CNV
13	44718870	44869545	chr13:44718870-44869545	Deleted CNV
13	52186155	52321521	chr13:52186155-52321521	Deleted CNV
13	79999710	80606946	chr13:79999710-80606946	Deleted CNV
14	23322243	23560656	chr14:23322243-23560656	Deleted CNV
14	24244353	24257499	chr14:24244353-24257499	Deleted CNV
14	24768387	24868116	chr14:24768387-24868116	Deleted CNV
14	30961035	31454346	chr14:30961035-31454346	Deleted CNV
14	35821359	35852313	chr14:35821359-35852313	Deleted CNV
14	36965019	37230081	chr14:36965019-37230081	Deleted CNV
14	50259909	50324736	chr14:50259909-50324736	Deleted CNV
14	52529967	52534377	chr14:52529967-52534377	Deleted CNV
14	54886251	54961788	chr14:54886251-54961788	Deleted CNV
14	55085457	55160868	chr14:55085457-55160868	Deleted CNV
14	55177941	55195371	chr14:55177941-55195371	Deleted CNV
14	56207382	56207403	chr14:56207382-56207403	Deleted CNV
14	56222481	56232624	chr14:56222481-56232624	Deleted CNV
14	59130666	59810016	chr14:59130666-59810016	Deleted CNV
14	59997798	60158784	chr14:59997798-60158784	Deleted CNV
14	60666144	60683091	chr14:60666144-60683091	Deleted CNV
14	60683112	60717615	chr14:60683112-60717615	Deleted CNV
14	60746637	60787986	chr14:60746637-60787986	Deleted CNV
14	60796701	61214076	chr14:60796701-61214076	Deleted CNV
14	62361747	62540520	chr14:62361747-62540520	Deleted CNV
14	64462062	64695183	chr14:64462062-64695183	Deleted CNV
14	64845186	64880298	chr14:64845186-64880298	Deleted CNV
14	64880319	64985676	chr14:64880319-64985676	Deleted CNV
14	65117052	65223417	chr14:65117052-65223417	Deleted CNV
14	65281608	65611518	chr14:65281608-65611518	Deleted CNV
14	65645328	65741109	chr14:65645328-65741109	Deleted CNV
14	67881996	67890333	chr14:67881996-67890333	Deleted CNV
14	67890354	67918956	chr14:67890354-67918956	Deleted CNV
14	68115642	68183304	chr14:68115642-68183304	Deleted CNV
14	68203758	68242713	chr14:68203758-68242713	Deleted CNV
14	68271441	68323185	chr14:68271441-68323185	Deleted CNV
14	68356449	68367873	chr14:68356449-68367873	Deleted CNV
14	68876346	68949825	chr14:68876346-68949825	Deleted CNV
14	68966646	68985021	chr14:68966646-68985021	Deleted CNV
14	69395298	69478542	chr14:69395298-69478542	Deleted CNV
14	69675774	69784554	chr14:69675774-69784554	Deleted CNV
14	70458192	70652484	chr14:70458192-70652484	Deleted CNV
14	71315832	71484315	chr14:71315832-71484315	Deleted CNV
14	71597232	71738310	chr14:71597232-71738310	Deleted CNV
14	74809035	74917836	chr14:74809035-74917836	Deleted CNV
14	74963196	74994780	chr14:74963196-74994780	Deleted CNV
14	75732111	76028988	chr14:75732111-76028988	Deleted CNV
14	90549606	90662040	chr14:90549606-90662040	Deleted CNV
14	93330090	93363018	chr14:93330090-93363018	Deleted CNV
14	93520035	94111206	chr14:93520035-94111206	Deleted CNV
14	100877994	101268258	chr14:100877994-101268258	Deleted CNV
14	102186546	102496359	chr14:102186546-102496359	Deleted CNV
14	102497766	102559989	chr14:102497766-102559989	Deleted CNV
14	102626265	102660558	chr14:102626265-102660558	Deleted CNV
14	103310067	103371933	chr14:103310067-103371933	Deleted CNV
15	37364733	37477755	chr15:37364733-37477755	Deleted CNV
15	41089650	41190555	chr15:41089650-41190555	Deleted CNV
15	41824986	41845419	chr15:41824986-41845419	Deleted CNV
15	42586551	42602385	chr15:42586551-42602385	Deleted CNV
15	43701021	43804593	chr15:43701021-43804593	Deleted CNV
15	44854845	44909970	chr15:44854845-44909970	Deleted CNV
15	45393222	45403953	chr15:45393222-45403953	Deleted CNV
15	50157135	50577744	chr15:50157135-50577744	Deleted CNV
15	50617098	50660841	chr15:50617098-50660841	Deleted CNV
15	63753585	63789285	chr15:63753585-63789285	Deleted CNV
15	65675694	65689806	chr15:65675694-65689806	Deleted CNV
15	69138972	69325620	chr15:69138972-69325620	Deleted CNV
15	72464469	72705360	chr15:72464469-72705360	Deleted CNV
15	83526261	83739222	chr15:83526261-83739222	Deleted CNV
15	84283962	84332850	chr15:84283962-84332850	Deleted CNV
16	19143537	19313784	chr16:19143537-19313784	Deleted CNV
16	27715128	28016625	chr16:27715128-28016625	Deleted CNV
16	31336893	31366650	chr16:31336893-31366650	Deleted CNV
16	48227613	48283473	chr16:48227613-48283473	Deleted CNV
16	48656727	48675060	chr16:48656727-48675060	Deleted CNV
16	53527971	53544981	chr16:53527971-53544981	Deleted CNV
16	56561883	56711550	chr16:56561883-56711550	Deleted CNV
16	66512712	66541104	chr16:66512712-66541104	Deleted CNV
16	66581319	66614751	chr16:66581319-66614751	Deleted CNV
16	67871076	67942686	chr16:67871076-67942686	Deleted CNV
16	68683860	68829600	chr16:68683860-68829600	Deleted CNV
16	68861562	68888064	chr16:68861562-68888064	Deleted CNV
16	69090756	69201048	chr16:69090756-69201048	Deleted CNV
16	71201991	71214423	chr16:71201991-71214423	Deleted CNV
16	86929899	87009468	chr16:86929899-87009468	Deleted CNV
16	89374047	89383833	chr16:89374047-89383833	Deleted CNV
17	1400700	1452906	chr17:1400700-1452906	Deleted CNV
17	2544822	2666160	chr17:2544822-2666160	Deleted CNV
17	5278560	5419974	chr17:5278560-5419974	Deleted CNV
17	8039346	8074584	chr17:8039346-8074584	Deleted CNV
17	8083509	8147601	chr17:8083509-8147601	Deleted CNV
17	8173662	8280027	chr17:8173662-8280027	Deleted CNV
17	8283387	8621970	chr17:8283387-8621970	Deleted CNV
17	12838686	12878019	chr17:12838686-12878019	Deleted CNV
17	17926839	17986164	chr17:17926839-17986164	Deleted CNV
17	18224052	18302361	chr17:18224052-18302361	Deleted CNV
17	19679310	19692876	chr17:19679310-19692876	Deleted CNV
17	20919633	21208551	chr17:20919633-21208551	Deleted CNV
17	26168688	26342946	chr17:26168688-26342946	Deleted CNV
17	27457416	27653535	chr17:27457416-27653535	Deleted CNV
17	27850074	27881049	chr17:27850074-27881049	Deleted CNV
17	27893775	27893796	chr17:27893775-27893796	Deleted CNV
17	28734636	28868742	chr17:28734636-28868742	Deleted CNV
17	28900578	28930902	chr17:28900578-28930902	Deleted CNV
17	29432739	29487843	chr17:29432739-29487843	Deleted CNV
17	31230339	31318833	chr17:31230339-31318833	Deleted CNV
17	34272042	34335693	chr17:34272042-34335693	Deleted CNV
17	36581391	36711150	chr17:36581391-36711150	Deleted CNV
17	36857919	36964452	chr17:36857919-36964452	Deleted CNV
17	37136400	37252173	chr17:37136400-37252173	Deleted CNV
17	37789920	37798803	chr17:37789920-37798803	Deleted CNV
17	38025666	38083626	chr17:38025666-38083626	Deleted CNV
17	38131464	38259501	chr17:38131464-38259501	Deleted CNV
17	38812368	38913546	chr17:38812368-38913546	Deleted CNV
17	39685443	39873750	chr17:39685443-39873750	Deleted CNV
17	40221363	40238835	chr17:40221363-40238835	Deleted CNV
17	40601862	40774902	chr17:40601862-40774902	Deleted CNV
17	40914615	40947291	chr17:40914615-40947291	Deleted CNV
17	40974003	41079738	chr17:40974003-41079738	Deleted CNV
17	41657931	41661375	chr17:41657931-41661375	Deleted CNV
17	41699952	41711271	chr17:41699952-41711271	Deleted CNV
17	42007392	42022995	chr17:42007392-42022995	Deleted CNV
17	42055587	42085638	chr17:42055587-42085638	Deleted CNV
17	42114219	42133392	chr17:42114219-42133392	Deleted CNV
17	42235284	42280077	chr17:42235284-42280077	Deleted CNV
17	42280098	42339675	chr17:42280098-42339675	Deleted CNV
17	42366072	42411180	chr17:42366072-42411180	Deleted CNV
17	42460782	42570150	chr17:42460782-42570150	Deleted CNV
17	42581322	42625128	chr17:42581322-42625128	Deleted CNV
17	42625149	42693168	chr17:42625149-42693168	Deleted CNV
17	43941765	44002791	chr17:43941765-44002791	Deleted CNV
17	44079567	44163798	chr17:44079567-44163798	Deleted CNV
17	44936367	44983890	chr17:44936367-44983890	Deleted CNV
17	44984457	45106887	chr17:44984457-45106887	Deleted CNV
17	45741885	45804024	chr17:45741885-45804024	Deleted CNV
17	45886596	45959214	chr17:45886596-45959214	Deleted CNV
17	45970281	46006800	chr17:45970281-46006800	Deleted CNV
17	46122741	46160226	chr17:46122741-46160226	Deleted CNV
17	46245192	46258107	chr17:46245192-46258107	Deleted CNV
17	46426044	46607547	chr17:46426044-46607547	Deleted CNV
17	48716598	48739572	chr17:48716598-48739572	Deleted CNV
17	48768090	48792366	chr17:48768090-48792366	Deleted CNV
17	48888483	48957300	chr17:48888483-48957300	Deleted CNV
17	49205163	49259238	chr17:49205163-49259238	Deleted CNV
17	49424634	49745955	chr17:49424634-49745955	Deleted CNV
17	53576502	53729655	chr17:53576502-53729655	Deleted CNV
17	56022183	56073549	chr17:56022183-56073549	Deleted CNV
17	56250789	56267589	chr17:56250789-56267589	Deleted CNV
17	56463351	56520912	chr17:56463351-56520912	Deleted CNV
17	57292305	57292326	chr17:57292305-57292326	Deleted CNV
17	57406419	57426222	chr17:57406419-57426222	Deleted CNV
17	57466395	57500667	chr17:57466395-57500667	Deleted CNV
17	57514716	57547077	chr17:57514716-57547077	Deleted CNV
17	57760731	57846390	chr17:57760731-57846390	Deleted CNV
17	57885870	57937656	chr17:57885870-57937656	Deleted CNV
17	58234386	58315509	chr17:58234386-58315509	Deleted CNV
17	58645041	58824045	chr17:58645041-58824045	Deleted CNV
17	59082387	59117352	chr17:59082387-59117352	Deleted CNV
17	60301710	60348750	chr17:60301710-60348750	Deleted CNV
17	60484242	60656400	chr17:60484242-60656400	Deleted CNV
17	60904221	60986121	chr17:60904221-60986121	Deleted CNV
17	61323759	61491717	chr17:61323759-61491717	Deleted CNV
17	61552281	61580988	chr17:61552281-61580988	Deleted CNV
17	62017074	62038074	chr17:62017074-62038074	Deleted CNV
17	62057877	62070729	chr17:62057877-62070729	Deleted CNV
17	62213172	62319621	chr17:62213172-62319621	Deleted CNV
17	62431530	62720700	chr17:62431530-62720700	Deleted CNV
17	62800185	62985867	chr17:62800185-62985867	Deleted CNV
17	63079800	63123900	chr17:63079800-63123900	Deleted CNV
17	63159138	63430395	chr17:63159138-63430395	Deleted CNV
17	63494277	63552258	chr17:63494277-63552258	Deleted CNV
17	69585306	69872586	chr17:69585306-69872586	Deleted CNV
17	69915090	70299663	chr17:69915090-70299663	Deleted CNV
17	77901705	77961261	chr17:77901705-77961261	Deleted CNV
17	78765036	78915879	chr17:78765036-78915879	Deleted CNV
18	11149215	11558232	chr18:11149215-11558232	Deleted CNV
18	14762601	14770056	chr18:14762601-14770056	Deleted CNV
18	19565112	19680780	chr18:19565112-19680780	Deleted CNV
18	19711146	19711167	chr18:19711146-19711167	Deleted CNV
18	19770366	19820220	chr18:19770366-19820220	Deleted CNV
18	21169323	21189756	chr18:21169323-21189756	Deleted CNV
18	21626367	21726873	chr18:21626367-21726873	Deleted CNV
18	23805663	23889411	chr18:23805663-23889411	Deleted CNV
18	24000375	24056592	chr18:24000375-24056592	Deleted CNV
18	38818353	39369267	chr18:38818353-39369267	Deleted CNV
18	44136351	44246685	chr18:44136351-44246685	Deleted CNV
18	47721135	47827710	chr18:47721135-47827710	Deleted CNV
18	47963979	48147687	chr18:47963979-48147687	Deleted CNV
18	48387780	48519555	chr18:48387780-48519555	Deleted CNV
18	51881697	52493364	chr18:51881697-52493364	Deleted CNV
19	7803411	7889952	chr19:7803411-7889952	Deleted CNV
19	10262343	10272255	chr19:10262343-10272255	Deleted CNV
19	11158245	11273010	chr19:11158245-11273010	Deleted CNV
19	34692189	34976739	chr19:34692189-34976739	Deleted CNV
19	40846554	41167245	chr19:40846554-41167245	Deleted CNV
19	43021923	43037379	chr19:43021923-43037379	Deleted CNV
2	7843941	7853034	chr2:7843941-7853034	Deleted CNV
2	8371944	8605401	chr2:8371944-8605401	Deleted CNV
2	16021278	16973040	chr2:16021278-16973040	Deleted CNV
2	17953551	17988621	chr2:17953551-17988621	Deleted CNV
2	23823261	23850435	chr2:23823261-23850435	Deleted CNV
2	25675692	25711014	chr2:25675692-25711014	Deleted CNV
2	27377763	27601014	chr2:27377763-27601014	Deleted CNV
2	32611530	32706723	chr2:32611530-32706723	Deleted CNV
2	39156789	39180813	chr2:39156789-39180813	Deleted CNV
2	55629378	55694079	chr2:55629378-55694079	Deleted CNV
2	60940425	60975453	chr2:60940425-60975453	Deleted CNV
2	61328106	61349568	chr2:61328106-61349568	Deleted CNV
2	61357128	61509231	chr2:61357128-61509231	Deleted CNV
2	61583319	61849893	chr2:61583319-61849893	Deleted CNV
2	62484387	62484408	chr2:62484387-62484408	Deleted CNV
2	63919737	64104012	chr2:63919737-64104012	Deleted CNV
2	69372261	69694926	chr2:69372261-69694926	Deleted CNV
2	70750239	71412432	chr2:70750239-71412432	Deleted CNV
2	72360393	72392544	chr2:72360393-72392544	Deleted CNV
2	73073973	73214757	chr2:73073973-73214757	Deleted CNV
2	74047680	74109861	chr2:74047680-74109861	Deleted CNV
2	74501679	74805003	chr2:74501679-74805003	Deleted CNV
2	85056636	85296036	chr2:85056636-85296036	Deleted CNV
2	86020641	86168838	chr2:86020641-86168838	Deleted CNV
2	86462880	86876664	chr2:86462880-86876664	Deleted CNV
2	88740456	88813452	chr2:88740456-88813452	Deleted CNV
2	95585469	95732112	chr2:95585469-95732112	Deleted CNV
2	98449323	98642250	chr2:98449323-98642250	Deleted CNV
2	99309945	99358665	chr2:99309945-99358665	Deleted CNV
2	99759765	99870288	chr2:99759765-99870288	Deleted CNV
2	100004310	100197174	chr2:100004310-100197174	Deleted CNV
2	104479179	104700435	chr2:104479179-104700435	Deleted CNV
2	105799512	105882777	chr2:105799512-105882777	Deleted CNV
2	108777039	109154451	chr2:108777039-109154451	Deleted CNV
2	113295567	113433264	chr2:113295567-113433264	Deleted CNV
2	118646220	118915125	chr2:118646220-118915125	Deleted CNV
2	120434076	120442980	chr2:120434076-120442980	Deleted CNV
2	120983436	121012311	chr2:120983436-121012311	Deleted CNV
2	136638894	136762563	chr2:136638894-136762563	Deleted CNV
2	139230819	139320762	chr2:139230819-139320762	Deleted CNV
2	139514382	139629273	chr2:139514382-139629273	Deleted CNV
2	143721270	143881332	chr2:143721270-143881332	Deleted CNV
2	152671029	152691819	chr2:152671029-152691819	Deleted CNV
2	158756262	158802651	chr2:158756262-158802651	Deleted CNV
2	162900360	163128840	chr2:162900360-163128840	Deleted CNV
2	169881600	170043363	chr2:169881600-170043363	Deleted CNV
2	171438498	171494841	chr2:171438498-171494841	Deleted CNV
2	171494862	171572919	chr2:171494862-171572919	Deleted CNV
2	171572940	171636507	chr2:171572940-171636507	Deleted CNV
2	173315247	173419218	chr2:173315247-173419218	Deleted CNV
2	173872356	173917905	chr2:173872356-173917905	Deleted CNV
2	173917926	174145545	chr2:173917926-174145545	Deleted CNV
2	174288702	174364869	chr2:174288702-174364869	Deleted CNV
2	178005660	178148775	chr2:178005660-178148775	Deleted CNV
2	179890851	179929911	chr2:179890851-179929911	Deleted CNV
2	180132729	180139764	chr2:180132729-180139764	Deleted CNV
2	187516413	187573491	chr2:187516413-187573491	Deleted CNV
2	190993551	191043993	chr2:190993551-191043993	Deleted CNV
2	191076270	191255988	chr2:191076270-191255988	Deleted CNV
2	219092139	219236346	chr2:219092139-219236346	Deleted CNV
2	219371250	219881571	chr2:219371250-219881571	Deleted CNV
2	219887178	220062654	chr2:219887178-220062654	Deleted CNV
2	220120152	220178091	chr2:220120152-220178091	Deleted CNV
20	13909287	13989444	chr20:13909287-13989444	Deleted CNV
20	20633025	21019467	chr20:20633025-21019467	Deleted CNV
20	24970848	25020030	chr20:24970848-25020030	Deleted CNV
20	30151380	30233637	chr20:30151380-30233637	Deleted CNV
20	30256695	30270618	chr20:30256695-30270618	Deleted CNV
20	30419718	30450063	chr20:30419718-30450063	Deleted CNV
20	32528727	32786397	chr20:32528727-32786397	Deleted CNV
20	32999001	33300981	chr20:32999001-33300981	Deleted CNV
20	34202994	34400877	chr20:34202994-34400877	Deleted CNV
20	35656866	35754117	chr20:35656866-35754117	Deleted CNV
20	44573298	44601165	chr20:44573298-44601165	Deleted CNV
20	48573546	48584949	chr20:48573546-48584949	Deleted CNV
20	50271606	50281539	chr20:50271606-50281539	Deleted CNV
20	51119250	51606828	chr20:51119250-51606828	Deleted CNV
20	52795302	52968195	chr20:52795302-52968195	Deleted CNV
20	54959751	55012251	chr20:54959751-55012251	Deleted CNV
20	57806028	58024596	chr20:57806028-58024596	Deleted CNV
20	60494742	60581892	chr20:60494742-60581892	Deleted CNV
21	39883137	39894960	chr21:39883137-39894960	Deleted CNV
21	39945024	39988431	chr21:39945024-39988431	Deleted CNV
21	40939290	40979904	chr21:40939290-40979904	Deleted CNV
21	41187972	41467167	chr21:41187972-41467167	Deleted CNV
21	42870513	42873810	chr21:42870513-42873810	Deleted CNV
21	42883176	42912345	chr21:42883176-42912345	Deleted CNV
22	24616494	25001130	chr22:24616494-25001130	Deleted CNV
22	26765697	26890017	chr22:26765697-26890017	Deleted CNV
22	29450673	29634864	chr22:29450673-29634864	Deleted CNV
22	30953559	31078551	chr22:30953559-31078551	Deleted CNV
22	31160535	31250898	chr22:31160535-31250898	Deleted CNV
22	31424547	31487085	chr22:31424547-31487085	Deleted CNV
22	38008215	38050572	chr22:38008215-38050572	Deleted CNV
22	38686914	38853255	chr22:38686914-38853255	Deleted CNV
22	41072661	41107878	chr22:41072661-41107878	Deleted CNV
22	42346542	42365001	chr22:42346542-42365001	Deleted CNV
22	43587516	43664754	chr22:43587516-43664754	Deleted CNV
22	46540578	46555194	chr22:46540578-46555194	Deleted CNV
22	46563699	46647384	chr22:46563699-46647384	Deleted CNV
3	3148656	3386397	chr3:3148656-3386397	Deleted CNV
3	9177735	9235653	chr3:9177735-9235653	Deleted CNV
3	9242184	9245838	chr3:9242184-9245838	Deleted CNV
3	9389478	9841335	chr3:9389478-9841335	Deleted CNV
3	27608301	28060620	chr3:27608301-28060620	Deleted CNV
3	30985164	31555356	chr3:30985164-31555356	Deleted CNV
3	36963738	37016490	chr3:36963738-37016490	Deleted CNV
3	40866630	41011761	chr3:40866630-41011761	Deleted CNV
3	44911188	45077277	chr3:44911188-45077277	Deleted CNV
3	46917549	46992078	chr3:46917549-46992078	Deleted CNV
3	47178684	47315331	chr3:47178684-47315331	Deleted CNV
3	48275535	48332886	chr3:48275535-48332886	Deleted CNV
3	48691608	48701667	chr3:48691608-48701667	Deleted CNV
3	48771912	49061313	chr3:48771912-49061313	Deleted CNV
3	49190001	49246428	chr3:49190001-49246428	Deleted CNV
3	49381437	49602525	chr3:49381437-49602525	Deleted CNV
3	49667709	49682136	chr3:49667709-49682136	Deleted CNV
3	49699629	49710129	chr3:49699629-49710129	Deleted CNV
3	49710150	49791903	chr3:49710150-49791903	Deleted CNV
3	49824768	49863471	chr3:49824768-49863471	Deleted CNV
3	49870779	49894866	chr3:49870779-49894866	Deleted CNV
3	50644671	50674407	chr3:50644671-50674407	Deleted CNV
3	51391326	51574824	chr3:51391326-51574824	Deleted CNV
3	51659286	51747024	chr3:51659286-51747024	Deleted CNV
3	51830037	51890412	chr3:51830037-51890412	Deleted CNV
3	51907485	51921576	chr3:51907485-51921576	Deleted CNV
3	52273011	52322424	chr3:52273011-52322424	Deleted CNV
3	52453044	52458819	chr3:52453044-52458819	Deleted CNV
3	52463397	52582467	chr3:52463397-52582467	Deleted CNV
3	53179980	53180694	chr3:53179980-53180694	Deleted CNV
3	74588787	74589963	chr3:74588787-74589963	Deleted CNV
3	74589984	74606742	chr3:74589984-74606742	Deleted CNV
3	93607794	94069542	chr3:93607794-94069542	Deleted CNV
3	97195665	97308099	chr3:97195665-97308099	Deleted CNV
3	98480193	98691201	chr3:98480193-98691201	Deleted CNV
3	101205405	101574249	chr3:101205405-101574249	Deleted CNV
3	108404835	108436356	chr3:108404835-108436356	Deleted CNV
3	110994996	111292944	chr3:110994996-111292944	Deleted CNV
3	114075003	114170742	chr3:114075003-114170742	Deleted CNV
3	119501991	119514297	chr3:119501991-119514297	Deleted CNV
3	119593950	119788095	chr3:119593950-119788095	Deleted CNV
3	123305343	123379830	chr3:123305343-123379830	Deleted CNV
3	156812670	157208541	chr3:156812670-157208541	Deleted CNV
3	168842205	169181838	chr3:168842205-169181838	Deleted CNV
3	169912113	169939476	chr3:169912113-169939476	Deleted CNV
3	183280146	183818082	chr3:183280146-183818082	Deleted CNV
3	183886584	184088268	chr3:183886584-184088268	Deleted CNV
3	184510263	184654281	chr3:184510263-184654281	Deleted CNV
3	185188185	185356857	chr3:185188185-185356857	Deleted CNV
3	185398689	185503836	chr3:185398689-185503836	Deleted CNV
3	195724641	195829767	chr3:195724641-195829767	Deleted CNV
4	7938672	7963998	chr4:7938672-7963998	Deleted CNV
4	37468641	37643487	chr4:37468641-37643487	Deleted CNV
4	40803756	41052774	chr4:40803756-41052774	Deleted CNV
4	42478884	42552069	chr4:42478884-42552069	Deleted CNV
4	72186828	72215241	chr4:72186828-72215241	Deleted CNV
4	75817728	75964854	chr4:75817728-75964854	Deleted CNV
4	76546071	76881042	chr4:76546071-76881042	Deleted CNV
4	87977442	88052433	chr4:87977442-88052433	Deleted CNV
4	99403941	99459318	chr4:99403941-99459318	Deleted CNV
4	103923603	104025936	chr4:103923603-104025936	Deleted CNV
4	122892294	123140934	chr4:122892294-123140934	Deleted CNV
4	128517774	128675841	chr4:128517774-128675841	Deleted CNV
4	143225796	143343102	chr4:143225796-143343102	Deleted CNV
4	173863662	174066627	chr4:173863662-174066627	Deleted CNV
4	175108899	175243404	chr4:175108899-175243404	Deleted CNV
4	175365099	175568232	chr4:175365099-175568232	Deleted CNV
5	41295513	41373990	chr5:41295513-41373990	Deleted CNV
5	42296688	42421953	chr5:42296688-42421953	Deleted CNV
5	44420271	44562084	chr5:44420271-44562084	Deleted CNV
5	54458355	54474420	chr5:54458355-54474420	Deleted CNV
5	64264305	64307502	chr5:64264305-64307502	Deleted CNV
5	67546857	67953984	chr5:67546857-67953984	Deleted CNV
5	71829744	72030420	chr5:71829744-72030420	Deleted CNV
5	72030441	72207639	chr5:72030441-72207639	Deleted CNV
5	74114628	74133486	chr5:74114628-74133486	Deleted CNV
5	74956518	75118071	chr5:74956518-75118071	Deleted CNV
5	77656341	78227898	chr5:77656341-78227898	Deleted CNV
5	79181781	79500057	chr5:79181781-79500057	Deleted CNV
5	79521687	79645482	chr5:79521687-79645482	Deleted CNV
5	82697748	82777233	chr5:82697748-82777233	Deleted CNV
5	87882690	87975510	chr5:87882690-87975510	Deleted CNV
5	89311719	89528313	chr5:89311719-89528313	Deleted CNV
5	89542404	89578965	chr5:89542404-89578965	Deleted CNV
5	89630079	89719476	chr5:89630079-89719476	Deleted CNV
5	91760697	91988337	chr5:91760697-91988337	Deleted CNV
5	92888754	92931195	chr5:92888754-92931195	Deleted CNV
5	98187495	98363622	chr5:98187495-98363622	Deleted CNV
5	131734365	131872041	chr5:131734365-131872041	Deleted CNV
5	132205080	132224694	chr5:132205080-132224694	Deleted CNV
5	132253128	132295506	chr5:132253128-132295506	Deleted CNV
5	133833525	133908831	chr5:133833525-133908831	Deleted CNV
5	134555757	134795010	chr5:134555757-134795010	Deleted CNV
5	135594627	135788835	chr5:135594627-135788835	Deleted CNV
5	136024455	136631523	chr5:136024455-136631523	Deleted CNV
5	137044404	137118450	chr5:137044404-137118450	Deleted CNV
5	137666256	137740806	chr5:137666256-137740806	Deleted CNV
5	138855759	138865398	chr5:138855759-138865398	Deleted CNV
5	139002948	139136487	chr5:139002948-139136487	Deleted CNV
5	139405896	139516629	chr5:139405896-139516629	Deleted CNV
5	139713000	139859622	chr5:139713000-139859622	Deleted CNV
5	141960483	141988371	chr5:141960483-141988371	Deleted CNV
5	142079238	142154754	chr5:142079238-142154754	Deleted CNV
5	142799748	142861782	chr5:142799748-142861782	Deleted CNV
5	143008341	143248833	chr5:143008341-143248833	Deleted CNV
5	145317984	145673283	chr5:145317984-145673283	Deleted CNV
5	151004805	151312266	chr5:151004805-151312266	Deleted CNV
5	153105855	153496707	chr5:153105855-153496707	Deleted CNV
6	28592298	28729533	chr6:28592298-28729533	Deleted CNV
6	28964859	28965636	chr6:28964859-28965636	Deleted CNV
6	29383662	29512896	chr6:29383662-29512896	Deleted CNV
6	29942283	30071811	chr6:29942283-30071811	Deleted CNV
6	30112971	30133131	chr6:30112971-30133131	Deleted CNV
6	30188928	30389457	chr6:30188928-30389457	Deleted CNV
6	34195686	34337856	chr6:34195686-34337856	Deleted CNV
6	35079555	35149947	chr6:35079555-35149947	Deleted CNV
6	51763320	52043670	chr6:51763320-52043670	Deleted CNV
6	83758752	83966358	chr6:83758752-83966358	Deleted CNV
6	89112114	89195589	chr6:89112114-89195589	Deleted CNV
6	105508074	105654780	chr6:105508074-105654780	Deleted CNV
6	105696549	105962472	chr6:105696549-105962472	Deleted CNV
6	110924982	110927670	chr6:110924982-110927670	Deleted CNV
6	110934978	111336561	chr6:110934978-111336561	Deleted CNV
6	116801328	116881695	chr6:116801328-116881695	Deleted CNV
6	118712454	118992342	chr6:118712454-118992342	Deleted CNV
6	125443206	125624058	chr6:125443206-125624058	Deleted CNV
6	133287294	133603659	chr6:133287294-133603659	Deleted CNV
6	152989158	153321504	chr6:152989158-153321504	Deleted CNV
7	6421821	6451095	chr7:6421821-6451095	Deleted CNV
7	38728767	39388524	chr7:38728767-39388524	Deleted CNV
7	43905729	44220666	chr7:43905729-44220666	Deleted CNV
7	49894173	50261715	chr7:49894173-50261715	Deleted CNV
7	91754040	91876302	chr7:91754040-91876302	Deleted CNV
7	94104696	94497312	chr7:94104696-94497312	Deleted CNV
7	99613584	99947673	chr7:99613584-99947673	Deleted CNV
7	101955777	102041478	chr7:101955777-102041478	Deleted CNV
7	103183437	103200237	chr7:103183437-103200237	Deleted CNV
7	105666708	106204812	chr7:105666708-106204812	Deleted CNV
7	116320092	116325552	chr7:116320092-116325552	Deleted CNV
7	127205211	127815198	chr7:127205211-127815198	Deleted CNV
7	127909698	128007621	chr7:127909698-128007621	Deleted CNV
7	128079000	128608809	chr7:128079000-128608809	Deleted CNV
7	128754969	128869062	chr7:128754969-128869062	Deleted CNV
7	129051132	129582285	chr7:129051132-129582285	Deleted CNV
7	143028459	143058888	chr7:143028459-143058888	Deleted CNV
8	32030985	32065194	chr8:32030985-32065194	Deleted CNV
8	37325841	37366203	chr8:37325841-37366203	Deleted CNV
8	37670283	37718331	chr8:37670283-37718331	Deleted CNV
8	38243793	38285121	chr8:38243793-38285121	Deleted CNV
8	42567252	42570507	chr8:42567252-42570507	Deleted CNV
8	49212471	49282569	chr8:49212471-49282569	Deleted CNV
8	49282590	49616364	chr8:49282590-49616364	Deleted CNV
8	49816053	49874223	chr8:49816053-49874223	Deleted CNV
8	64076481	64232910	chr8:64076481-64232910	Deleted CNV
8	65667105	65776284	chr8:65667105-65776284	Deleted CNV
8	66635541	66839283	chr8:66635541-66839283	Deleted CNV
8	67100586	67180113	chr8:67100586-67180113	Deleted CNV
8	68030361	68294184	chr8:68030361-68294184	Deleted CNV
8	70813617	70852404	chr8:70813617-70852404	Deleted CNV
8	74062611	74279772	chr8:74062611-74279772	Deleted CNV
8	77596596	77632653	chr8:77596596-77632653	Deleted CNV
8	77853216	77882511	chr8:77853216-77882511	Deleted CNV
8	77895426	78004143	chr8:77895426-78004143	Deleted CNV
8	85210734	85210986	chr8:85210734-85210986	Deleted CNV
8	85615257	85636887	chr8:85615257-85636887	Deleted CNV
8	89086872	89129187	chr8:89086872-89129187	Deleted CNV
8	90877122	90950622	chr8:90877122-90950622	Deleted CNV
8	90957489	91035315	chr8:90957489-91035315	Deleted CNV
8	91067214	91172424	chr8:91067214-91172424	Deleted CNV
8	91799904	91812588	chr8:91799904-91812588	Deleted CNV
8	100835322	100937466	chr8:100835322-100937466	Deleted CNV
8	101109456	101167206	chr8:101109456-101167206	Deleted CNV
8	101398815	101578953	chr8:101398815-101578953	Deleted CNV
8	104089104	104200173	chr8:104089104-104200173	Deleted CNV
8	106076670	106405236	chr8:106076670-106405236	Deleted CNV
8	107137695	107236122	chr8:107137695-107236122	Deleted CNV
8	108900393	109110876	chr8:108900393-109110876	Deleted CNV
8	110085507	110127927	chr8:110085507-110127927	Deleted CNV
8	119180229	119517783	chr8:119180229-119517783	Deleted CNV
8	120225630	120276618	chr8:120225630-120276618	Deleted CNV
8	120414567	120631371	chr8:120414567-120631371	Deleted CNV
8	121045827	121055781	chr8:121045827-121055781	Deleted CNV
8	125831349	125862576	chr8:125831349-125862576	Deleted CNV
8	126434427	126551586	chr8:126434427-126551586	Deleted CNV
8	128798817	128831472	chr8:128798817-128831472	Deleted CNV
8	129312372	129458301	chr8:129312372-129458301	Deleted CNV
8	130712106	130836846	chr8:130712106-130836846	Deleted CNV
8	133429359	133490049	chr8:133429359-133490049	Deleted CNV
8	139355790	139465872	chr8:139355790-139465872	Deleted CNV
8	141522108	141577800	chr8:141522108-141577800	Deleted CNV
8	141594264	141594285	chr8:141594264-141594285	Deleted CNV
8	141613311	141628200	chr8:141613311-141628200	Deleted CNV
8	141965964	141988161	chr8:141965964-141988161	Deleted CNV
8	142113405	142143099	chr8:142113405-142143099	Deleted CNV
8	142174452	142254063	chr8:142174452-142254063	Deleted CNV
8	142688637	143228337	chr8:142688637-143228337	Deleted CNV
8	144985596	145032258	chr8:144985596-145032258	Deleted CNV
9	34980876	35115780	chr9:34980876-35115780	Deleted CNV
9	36849708	37005255	chr9:36849708-37005255	Deleted CNV
9	80143707	80298120	chr9:80143707-80298120	Deleted CNV
9	94827306	94905237	chr9:94827306-94905237	Deleted CNV
9	128334045	128412270	chr9:128334045-128412270	Deleted CNV
9	128755011	128811648	chr9:128755011-128811648	Deleted CNV
9	138811428	138852063	chr9:138811428-138852063	Deleted CNV
9	141054459	141153432	chr9:141054459-141153432	Deleted CNV
1	16302111	16302132	chr1:16302111-16302132	Somatic
1	173029479	173029500	chr1:173029479-173029500	Somatic
2	201623373	201623394	chr2:201623373-201623394	Somatic
11	60151203	60151224	chr11:60151203-60151224	Somatic
15	24407985	24408006	chr15:24407985-24408006	Somatic
16	29110452	29110473	chr16:29110452-29110473	Somatic
17	48535242	48535263	chr17:48535242-48535263	Somatic
17	66883278	66883299	chr17:66883278-66883299	Somatic
