# Supplementary material for: An Integrative Analysis of Chromatin Interactions, Gene Expression and Genomic Variants Identifies 30 Likely Regulatory Variants in Prostate Cancer
Source: Preprints.org preprint supplement (doi:10.20944/preprints202301.0343.v1), 2023-01-19
Supplement: Supplementary file 6 [file SupplementaryTable6.xlsx]

## Sheet: Supplementary Table 6a
	Supplementary Table 6a: List of determined regulatory variants in LNCaP cell line
	Chr	Start	End	ID	Type
	1	23695713	23695713	chr1:23695713-23695713	CNV (Deletion)
	1	23695714	23736125	chr1:23695714-23736125	CNV (Deletion)
	1	144480624	144615223	chr1:144480624-144615223	CNV (Deletion)
	2	42319759	42329846	chr2:42319759-42329846	CNV (Deletion)
	2	73916673	73947014	chr2:73916673-73947014	CNV (Deletion)
	20	62356627	62356627	rs6011058	SNP
	3	141094209	141094209	rs6440003	SNP
	3	141094769	141094769	rs4683605	SNP

## Sheet: Supplementary Table 6b
	Supplementary Table 6b: List of determined regulatory variants in PC3 cell line
	Chr	Start	End	ID	Type
	12	125234008	125321679	chr12:125234008-125321679	CNV (Duplicated)
	14	50942528	51038677	chr14:50942528-51038677	CNV (Duplicated)
	17	41299932	41376838	chr17:41299932-41376838	CNV (Duplicated)
	17	41645245	41752759	chr17:41645245-41752759	CNV (Duplicated)
	17	46686799	46716396	chr17:46686799-46716396	CNV (Duplicated)
	19	5911519	6072822	chr19:5911519-6072822	CNV (Duplicated)
	19	12554993	12562510	chr19:12554993-12562510	CNV (Duplicated)
	19	12715946	12732211	chr19:12715946-12732211	CNV (Duplicated)
	8	98180911	98608824	chr8:98180911-98608824	CNV (Duplicated)
	8	124555175	124657263	chr8:124555175-124657263	CNV (Duplicated)
	8	125531022	125724066	chr8:125531022-125724066	CNV (Duplicated)
	8	127394134	127501076	chr8:127394134-127501076	CNV (Duplicated)
	8	127580690	127580690	chr8:127580690-127580690	CNV (Duplicated)
	8	127580691	127581486	chr8:127580691-127581486	CNV (Duplicated)
	8	127581487	127929211	chr8:127581487-127929211	CNV (Duplicated)
	8	145730292	145759698	chr8:145730292-145759698	CNV (Duplicated)
	16	67946665	68016989	chr16:67946665-68016989	CNV (Deleted)
	16	89374045	89380548	chr16:89374045-89380548	CNV (Deleted)
	17	7763483	7794255	chr17:7763483-7794255	CNV (Deleted)
	17	41168331	41169409	chr17:41168331-41169409	CNV (Deleted)
	17	41169410	41180087	chr17:41169410-41180087	CNV (Deleted)
	17	41301618	41333880	chr17:41301618-41333880	CNV (Deleted)
