# Supplementary material for: An Integrative Analysis of Chromatin Interactions, Gene Expression and Genomic Variants Identifies 30 Likely Regulatory Variants in Prostate Cancer
Source: Preprints.org preprint supplement (doi:10.20944/preprints202301.0343.v1), 2023-01-19
Supplement: Supplementary file 7 [file SupplementaryTable7.xlsx]

## Sheet: Supplementary Table 7
Supplementary Table7. List of associated genes in regulatory variants
Chromosome	Start	End	Strand	GeneID	Project	GeneName	GeneClass
1	23694978	23704203	+	ENSG00000249087	1_FANTOM	'C1orf213'	protein_coding
1	23682454	23697077	-	ENSG00000125945	1_FANTOM	'ZNF436'	protein_coding
1	23696747	23696839	+	ENSG00000201405	2_ensembl	'Y_RNA'	noncoding_misc_RNA
1	23704873	23705522	-	ENSG00000271420	2_ensembl	'RP5-1057J7.7'	noncoding_lncRNA_lincRNA
1	23707927	23710027	+	CATG00000055806	1_FANTOM	'CATG00000055806.1'	noncoding_lncRNA_noncoding_antisense
1	23718697	23719736	+	CATG00000055941	1_FANTOM	'CATG00000055941.1'	noncoding_lncRNA_noncoding_antisense
1	23699580	23751241	-	ENSG00000204219	1_FANTOM	'TCEA3'	protein_coding
1	144491442	144491605	-	ENSG00000206828	2_ensembl	'RNVU1-5'	noncoding_snRNA
1	144533174	144533628	-	CATG00000074007	1_FANTOM	'CATG00000074007.1'	noncoding_lncRNA_intergenic
1	144534038	144534199	+	ENSG00000201699	1_FANTOM	'RNU1-59P'	noncoding_small_RNA
1	144536360	144536976	+	CATG00000015924	1_FANTOM	'CATG00000015924.1'	noncoding_lncRNA_intergenic
1	144572593	144581427	+	CATG00000015945	1_FANTOM	'CATG00000015945.1'	noncoding_lncRNA_intergenic
1	144612266	144612683	-	ENSG00000203843	2_ensembl	'PFN1P2'	noncoding_pseudogene
1	144456138	144521245	-	ENSG00000236943	1_FANTOM	'RP11-640M9.1'	noncoding_lncRNA_intergenic
1	144520124	144530853	+	CATG00000015899	1_FANTOM	'CATG00000015899.1'	protein_coding
1	144339738	144521058	+	ENSG00000231360	2_ensembl	'AL592284.1'	protein_coding
1	144593688	144830302	+	ENSG00000225241	1_FANTOM	'RP11-640M9.2'	noncoding_pseudogene
2	42325927	42327046	+	CATG00000042562	1_FANTOM	'CATG00000042562.1'	noncoding_lncRNA_intergenic
2	42328540	42330802	+	CATG00000042563	1_FANTOM	'CATG00000042563.1'	noncoding_lncRNA_intergenic
2	42308863	42340837	-	CATG00000048249	1_FANTOM	'CATG00000048249.1'	noncoding_lncRNA_intergenic
2	73927639	73929252	-	ENSG00000204872	1_FANTOM	'AC092653.5'	noncoding_pseudogene
2	73495994	73947872	+	ENSG00000116127	1_FANTOM	'ALMS1'	protein_coding
20	62331846	62377309	+	ENSG00000273154	1_FANTOM	'RP4-583P15.15'	protein_coding
20	62338801	62367494	+	ENSG00000197114	1_FANTOM	'ZGPAT'	protein_coding
3	141030709	141173279	+	ENSG00000177311	1_FANTOM	'ZBTB38'	protein_coding
12	125256611	125260484	+	CATG00000010778	1_FANTOM	'CATG00000010778.1'	noncoding_lncRNA_intergenic
12	125271310	125276024	+	CATG00000010780	1_FANTOM	'CATG00000010780.1'	noncoding_lncRNA_divergent
12	125256181	125391811	-	ENSG00000073060	1_FANTOM	'SCARB1'	protein_coding
14	51038637	51038858	-	ENSG00000258577	2_ensembl	'SNRPGP1'	noncoding_pseudogene
14	50999475	51107664	+	ENSG00000198513	1_FANTOM	'ATL1'	protein_coding
14	50867981	51027844	-	ENSG00000012983	1_FANTOM	'MAP4K5'	protein_coding
17	41320187	41320266	-	ENSG00000267595	2_ensembl	'RP11-242D8.2'	noncoding_pseudogene
17	41321897	41322224	-	ENSG00000267340	1_FANTOM	'RP11-242D8.3'	noncoding_pseudogene
17	41300388	41324024	-	ENSG00000267002	1_FANTOM	'RP11-242D8.1'	noncoding_lncRNA_divergent
17	41322498	41363726	+	ENSG00000188554	1_FANTOM	'NBR1'	protein_coding
17	41363894	41383518	+	ENSG00000184988	1_FANTOM	'TMEM106A'	protein_coding
17	41368039	41380674	-	ENSG00000236383	1_FANTOM	'LINC00854'	noncoding_lncRNA_divergent
17	41277607	41305996	+	ENSG00000198496	1_FANTOM	'NBR2'	noncoding_pseudogene
17	41561352	41646944	+	ENSG00000067596	1_FANTOM	'DHX8'	protein_coding
17	41717605	41739290	-	ENSG00000005102	1_FANTOM	'MEOX1'	protein_coding
17	41622159	41687706	+	ENSG00000267747	1_FANTOM	'RP11-392O1.4'	noncoding_lncRNA_divergent
17	46697702	46708296	-	ENSG00000170689	1_FANTOM	'HOXB9'	protein_coding
17	46709852	46709921	-	ENSG00000210741	2_ensembl	'MIR196A1'	noncoding_miRNA
17	46683404	46724693	-	ENSG00000260027	1_FANTOM	'HOXB7'	protein_coding
17	46683404	46703702	-	ENSG00000120068	1_FANTOM	'HOXB8'	protein_coding
17	46688649	46724693	-	ENSG00000272763	1_FANTOM	'RP11-357H14.17'	noncoding_lncRNA_intergenic
17	46689604	46712293	+	ENSG00000242207	1_FANTOM	'HOXB-AS4'	noncoding_lncRNA_noncoding_antisense
19	5911589	5913910	-	ENSG00000267571	2_ensembl	'AC104532.4'	noncoding_antisense
19	6062609	6077872	+	ENSG00000267262	1_FANTOM	'CTC-232P5.3'	noncoding_lncRNA_noncoding_antisense
19	6070017	6070312	-	CATG00000040147	1_FANTOM	'CATG00000040147.1'	noncoding_short_ncRNA
19	6072782	6073538	+	ENSG00000267589	1_FANTOM	'CTC-232P5.4'	noncoding_pseudogene
19	5904883	5916334	+	ENSG00000267314	1_FANTOM	'AC104532.2'	protein_coding
19	5905463	5978151	-	ENSG00000031823	1_FANTOM	'RANBP3'	protein_coding
19	5909040	5915931	+	ENSG00000105519	1_FANTOM	'CAPS'	protein_coding
19	5978394	6020374	+	ENSG00000266983	1_FANTOM	'CTC-232P5.1'	noncoding_lncRNA_divergent
19	5782075	5950194	-	ENSG00000156413	1_FANTOM	'FUT6'	protein_coding
19	5990976	6199604	-	ENSG00000087903	1_FANTOM	'RFX2'	protein_coding
19	12551117	12566275	+	CATG00000038594	1_FANTOM	'CATG00000038594.1'	noncoding_lncRNA_divergent
19	12486483	12577612	-	ENSG00000268870	1_FANTOM	'CTD-3105H18.16'	protein_coding
19	12561749	12571519	+	ENSG00000234848	2_ensembl	'CTD-3105H18.7'	noncoding_antisense
19	12500118	12624669	-	ENSG00000242852	1_FANTOM	'ZNF709'	protein_coding
19	12540213	12595609	-	ENSG00000269755	1_FANTOM	'CTD-3105H18.18'	protein_coding
19	12725743	12727407	+	CATG00000038595	1_FANTOM	'CATG00000038595.1'	noncoding_lncRNA_noncoding_sense_intronic
19	12721750	12748693	+	ENSG00000173875	1_FANTOM	'ZNF791'	protein_coding
19	12677824	12721627	-	ENSG00000188033	1_FANTOM	'ZNF490'	protein_coding
8	98253970	98254432	-	ENSG00000260640	2_ensembl	'KB-1000E4.2'	noncoding_lncRNA_lincRNA
8	98370494	98370702	+	ENSG00000207215	1_FANTOM	'U3'	noncoding_small_RNA
8	98446649	98446788	+	CATG00000099921	1_FANTOM	'CATG00000099921.1'	noncoding_short_ncRNA
8	98577766	98577943	+	CATG00000099925	1_FANTOM	'CATG00000099925.1'	noncoding_short_ncRNA
8	97962146	98458489	-	CATG00000103306	1_FANTOM	'CATG00000103306.1'	noncoding_lncRNA_intergenic
8	98155368	98290134	-	ENSG00000180543	1_FANTOM	'TSPYL5'	protein_coding
8	124575310	124581002	-	ENSG00000254113	2_ensembl	'RP11-174I12.2'	noncoding_lncRNA_lincRNA
8	124600999	124601286	+	ENSG00000251840	2_ensembl	'RN7SKP155'	noncoding_misc_RNA
8	124656682	124685164	-	ENSG00000175946	1_FANTOM	'KLHL38'	protein_coding
8	124467289	124560608	-	ENSG00000156804	1_FANTOM	'FBXO32'	protein_coding
8	124626148	124688242	+	ENSG00000253286	1_FANTOM	'CTD-2552K11.2'	noncoding_lncRNA_intergenic
8	125591872	125592889	+	ENSG00000272486	2_ensembl	'RP11-532M24.1'	noncoding_antisense
8	125639279	125639931	+	CATG00000100690	1_FANTOM	'CATG00000100690.1'	noncoding_lncRNA_noncoding_antisense
8	125500725	125551325	-	ENSG00000147687	1_FANTOM	'TATDN1'	protein_coding
8	125462612	125703891	+	ENSG00000183665	1_FANTOM	'TRMT12'	protein_coding
8	125551364	125593059	+	ENSG00000147684	1_FANTOM	'NDUFB9'	protein_coding
8	125558873	125740901	-	ENSG00000170873	1_FANTOM	'MTSS1'	protein_coding
8	127409539	127446275	+	CATG00000100750	1_FANTOM	'CATG00000100750.1'	noncoding_lncRNA_intergenic
8	127486434	127504841	+	ENSG00000253427	2_ensembl	'RP11-103H7.1'	noncoding_lncRNA_lincRNA
8	127569581	127726222	+	ENSG00000254286	1_FANTOM	'RP11-89K10.1'	noncoding_lncRNA_divergent
8	127594876	127595251	-	ENSG00000253543	2_ensembl	'RP11-89K10.2'	noncoding_pseudogene
8	127596032	127597591	+	CATG00000100760	1_FANTOM	'CATG00000100760.1'	noncoding_sense_overlap_RNA
8	127683766	127683899	+	ENSG00000212451	1_FANTOM	'RNU11-4P'	noncoding_small_RNA
8	127817400	127818091	+	CATG00000100787	1_FANTOM	'CATG00000100787.1'	noncoding_sense_overlap_RNA
8	127831327	127832208	+	CATG00000100789	1_FANTOM	'CATG00000100789.1'	noncoding_sense_overlap_RNA
8	127836885	127838384	+	CATG00000100790	1_FANTOM	'CATG00000100790.1'	noncoding_lncRNA_noncoding_sense_intronic
8	127706726	127726265	-	CATG00000104020	1_FANTOM	'CATG00000104020.1'	noncoding_lncRNA_intergenic
8	127883355	127908818	-	CATG00000104027	1_FANTOM	'CATG00000104027.1'	noncoding_lncRNA_intergenic
8	127644585	127849158	+	CATG00000100764	1_FANTOM	'CATG00000100764.1'	noncoding_lncRNA_intergenic
8	127659299	127670382	+	CATG00000100766	1_FANTOM	'CATG00000100766.1'	noncoding_lncRNA_noncoding_sense_intronic
8	127779121	127802882	-	ENSG00000253573	2_ensembl	'RP11-351C8.1'	noncoding_lncRNA_lincRNA
8	127781646	127859226	-	CATG00000104022	1_FANTOM	'CATG00000104022.1'	noncoding_lncRNA_intergenic
8	127857278	128203887	+	ENSG00000253438	1_FANTOM	'PCAT1'	noncoding_lncRNA_intergenic
8	145728451	145732557	+	ENSG00000167701	1_FANTOM	'GPT'	protein_coding
8	145737950	145739056	+	ENSG00000265393	2_ensembl	'CTD-2517M22.17'	noncoding_antisense
8	145754586	145755380	+	CATG00000101352	1_FANTOM	'CATG00000101352.1'	noncoding_lncRNA_divergent
8	145719151	145730807	-	ENSG00000255182	1_FANTOM	'CTD-2517M22.14'	noncoding_lncRNA_divergent
8	145731079	145748190	-	ENSG00000160957	1_FANTOM	'RECQL4'	protein_coding
8	145733646	145743210	+	ENSG00000167700	1_FANTOM	'MFSD3'	protein_coding
8	145635830	146176244	-	ENSG00000170631	1_FANTOM	'ZNF16'	protein_coding
8	145743388	145753986	+	ENSG00000160959	1_FANTOM	'LRRC14'	protein_coding
8	145743804	145911227	-	ENSG00000147799	1_FANTOM	'ARHGAP39'	protein_coding
8	145747761	145752417	-	ENSG00000254402	1_FANTOM	'LRRC24'	protein_coding
8	145750389	145754486	-	ENSG00000213563	1_FANTOM	'C8orf82'	protein_coding
16	67955890	67956743	+	CATG00000027658	1_FANTOM	'CATG00000027658.1'	noncoding_lncRNA_noncoding_sense_intronic
16	67961227	67971007	-	ENSG00000261884	1_FANTOM	'CTC-479C5.12'	protein_coding
16	67963473	67965765	-	ENSG00000141086	1_FANTOM	'CTRL'	protein_coding
16	67968405	67970753	-	ENSG00000205220	1_FANTOM	'PSMB10'	protein_coding
16	67977450	67978023	-	ENSG00000267660	1_FANTOM	'CTC-479C5.17'	noncoding_sense_overlap_RNA
16	67985817	67986583	+	CATG00000027660	1_FANTOM	'CATG00000027660.1'	protein_coding
16	68002766	68003271	+	CATG00000027662	1_FANTOM	'CATG00000027662.1'	noncoding_lncRNA_divergent
16	67927157	67983697	+	ENSG00000159792	1_FANTOM	'PSKH1'	protein_coding
16	67960787	68003527	-	ENSG00000124067	1_FANTOM	'SLC12A4'	protein_coding
16	67968325	67985925	-	ENSG00000213398	1_FANTOM	'LCAT'	protein_coding
16	67969502	68006536	+	CATG00000027659	1_FANTOM	'CATG00000027659.1'	protein_coding
16	68009565	68014402	-	ENSG00000141096	1_FANTOM	'DPEP3'	protein_coding
16	89371693	89378331	+	CATG00000028341	1_FANTOM	'CATG00000028341.1'	protein_coding
16	89333511	89556969	-	ENSG00000167522	1_FANTOM	'ANKRD11'	protein_coding
17	7785676	7786405	+	CATG00000030608	1_FANTOM	'CATG00000030608.1'	noncoding_lncRNA_noncoding_antisense
17	7750866	7790799	-	ENSG00000183011	1_FANTOM	'LSMD1'	protein_coding
17	7760405	7782228	+	ENSG00000182224	1_FANTOM	'CYB5D1'	protein_coding
17	7787654	7816467	+	ENSG00000170004	1_FANTOM	'CHD3'	protein_coding
17	41157468	41170773	+	ENSG00000068079	1_FANTOM	'IFI35'	protein_coding
17	41166619	41177103	-	ENSG00000108828	1_FANTOM	'VAT1'	protein_coding
17	41176782	41188216	+	ENSG00000108830	1_FANTOM	'RND2'	protein_coding
17	41177924	41188236	-	CATG00000033720	1_FANTOM	'CATG00000033720.1'	noncoding_lncRNA_noncoding_antisense
