# Supplementary material for: An Integrative Analysis of Chromatin Interactions, Gene Expression and Genomic Variants Identifies 30 Likely Regulatory Variants in Prostate Cancer
Source: Preprints.org preprint supplement (doi:10.20944/preprints202301.0343.v1), 2023-01-19
Supplement: Supplementary file 8 [file SupplementaryTable8.xlsx]

## Sheet: Supplementary Table 8
Supplementary Table 8: List of enriched genes with the pathway analysis.
Enrichment FDR	Number of genes	Pathway Genes	Fold Enrichment	Pathway	URL	Genes
7.49219e-13	23	795	9.55807	LASTOWSKA NEUROBLASTOMA COPY NUMBER DN	http://www.gsea-msigdb.org/gsea/msigdb/cards/LASTOWSKA_NEUROBLASTOMA_COPY_NUMBER_DN	RBM6 LARS2 RAD18 HSPB11 SEC22C SCP2 TXNDC12 DHX30 BTF3L4 VGLL4 CTDSPL LIMD1 FGD5 CLASP2 GNL3 SETD5 BTD PDCD6IP RPL15 TRAK1 FAF1 ATG7 ANKRD28
1.4241e-14	18	294	20.2272	Chr3p21	http://www.gsea-msigdb.org/gsea/msigdb/cards/chr3p21	RBM6 LARS2 ALAS1 DOCK3 C3orf18 KIF9 ACTR8 GNAI2 RRP9 DHX30 LIMD1 CACNA2D3 GNL3 BSN RAD54L2 GLYCTK LAMB2 AMIGO3
0.000435008	18	1412	4.2116	LHX9 target gene	http://regulatorycircuits.org	LARS2 ALAS1 ACTR8 FRMD4B RRP9 VGLL4 ARL6IP5 TMF1 LIMD1 CACNA2D3 ENTPD3 GLYCTK BTD PDCD6IP RPL15 ATG7 NKIRAS1 ANKRD28
0.0177097	17	1824	3.07917	BARHL2 target gene	http://regulatorycircuits.org	ALAS1 ACAA1 RAD18 RARB ACTR8 FRMD4B VGLL4 ARL6IP5 TMF1 CACNA2D3 SLMAP GNL3 GLYCTK ACOX2 BTD ATG7 ANKRD28
0.0227199	17	1903	2.95134	TBX5 target gene	http://regulatorycircuits.org	LARS2 NDC1 HSPB11 FRMD4B SCP2 MRPL37 TXNDC12 IRAK2 BTF3L4 LRIG1 LIMD1 ZFYVE9 SSBP3 SLMAP ACOX2 BTD ANKRD28
0.0229063	16	1718	3.07685	BCL6 25482012 ChIP-Seq CML-JURL-MK1 Human	https://amp.pharm.mssm.edu/Enrichr	LARS2 C3orf18 SEC22C ACTR8 GNAI2 DHX30 VGLL4 CAND2 TSEN2 ZFYVE9 CACNA2D3 NEK10 FBLN2 BSN RPL15 MITF
0.0516086	16	1997	2.64698	Hsa-miR-5696 target gene	http://mirdb.org	RAD18 DOCK3 FRMD4B CTDSPL ARL6IP5 TMF1 LIMD1 PRKAA2 CLASP2 ATXN7 PRICKLE2 SLMAP PDCD6IP TRAK1 ROBO2 ANKRD28
0.0143478	15	1387	3.57293	PBX1 target gene	http://regulatorycircuits.org	LARS2 ALAS1 NDC1 HSPB11 ACTR8 RRP9 MRPL37 EMC3 IRAK2 LIMD1 SSBP3 CACNA2D3 GLYCTK BTD ANKRD28
0.0177097	15	1449	3.42005	MiR-137 target gene	http://www.targetscan.org	RAD18 CTDSPL TMF1 SSBP3 CLASP2 ATXN7 SLMAP SNRK BSN RAD54L2 PDCD6IP RPL15 MITF ATG7 ANKRD28
0.0308702	15	1613	3.07232	Hsa-miR-7-5p POSITIVE DOWN target gene	http://diana.imis.athena-innovation.gr/DianaTools	NDC1 RAD18 DOCK3 DHCR24 MRPL37 VGLL4 CTDSPL TMF1 CLASP2 SNRK BSN RAD54L2 SETD5 BTD RPL15
0.0407317	15	1688	2.93581	CUX1 19635798 ChIP-ChIP MULTIPLE HUMAN CANCER TYPES Human	https://amp.pharm.mssm.edu/Enrichr	RBM6 ACAA1 RARB KIF9 ACTR8 GNAI2 SCP2 MRPL37 DHX30 TMF1 LRIG1 FBLN2 PRICKLE2 RPL15 MITF
0.0409811	15	1698	2.91852	TCF12/HEB 22897851 ChIP-Seq JUKARTE6-1 Human	https://amp.pharm.mssm.edu/Enrichr	LARS2 ALAS1 FRMD4B IRAK2 CTDSPL LRIG1 FGD5 SSBP3 NEK10 FBLN2 SNRK BTD MITF ATG7 ZNF717
0.0420039	15	1707	2.90314	ETV1 20927104 ChIP-Seq GIST48 Human	https://amp.pharm.mssm.edu/Enrichr	RAD18 HSPB11 DHCR24 SCP2 MRPL37 BTF3L4 LRIG1 ZFYVE9 SSBP3 PRKAA2 NEK10 SETD5 TRAK1 FAF1 AGBL4
0.0447458	15	1728	2.86785	CREB1 26743006 Chip-Seq LNCaP-abl Human	https://amp.pharm.mssm.edu/Enrichr	DOCK3 ACTR8 GNAI2 DHCR24 BTF3L4 CTDSPL LIMD1 ZFYVE9 SSBP3 SLMAP RAD54L2 ACOX2 FAF1 ANKRD28 ZNF717
0.0499282	15	1766	2.80615	DODD NASOPHARYNGEAL CARCINOMA UP	http://www.gsea-msigdb.org/gsea/msigdb/cards/DODD_NASOPHARYNGEAL_CARCINOMA_UP	RARB KIF9 FRMD4B DHCR24 EMC3 IRAK2 CAND2 TMF1 PRKAA2 NEK10 SNRK ENTPD3 PDCD6IP TRAK1 AGBL4
0.0516086	15	1787	2.77317	MiR-506 target gene	http://www.targetscan.org	SEC22C ACTR8 GNAI2 FRMD4B DHCR24 EMC3 CTDSPL CAND2 LRIG1 FGD5 PRKAA2 RAD54L2 SUCLG2 AGBL4 MITF
0.052892	15	1799	2.75467	MiR-506-3p target gene	http://www.targetscan.org	SEC22C ACTR8 GNAI2 FRMD4B DHCR24 EMC3 CTDSPL CAND2 LRIG1 FGD5 PRKAA2 RAD54L2 SUCLG2 AGBL4 MITF
0.0651467	15	1895	2.61512	BCL6B target gene	http://regulatorycircuits.org	LARS2 ALAS1 ACAA1 DOCK3 C3orf18 GNAI2 RRP9 VGLL4 CTDSPL TMF1 LIMD1 GLYCTK ACOX2 BTD ATG7
0.0673813	15	1905	2.60139	MiR-124-3p.1 target gene	http://www.targetscan.org	SEC22C ACTR8 GNAI2 FRMD4B DHCR24 EMC3 CTDSPL CAND2 LRIG1 FGD5 PRKAA2 RAD54L2 SUCLG2 AGBL4 MITF
0.0285014	14	1409	3.28267	MiR-137-3p target gene	http://www.targetscan.org	CTDSPL TMF1 SSBP3 CLASP2 ATXN7 SLMAP SNRK BSN RAD54L2 PDCD6IP RPL15 MITF ATG7 ANKRD28
0.0554099	14	1608	2.87642	Hsa-miR-331-5p predicted target gene	http://www.mirz.unibas.ch/ElMMo3	RARB DOCK3 SEC22C DHCR24 BTF3L4 TMF1 LIMD1 NEK10 ATXN7 PRICKLE2 GNL3 TRAK1 ROBO2 ATG7
0.0556927	14	1610	2.87284	AR 22383394 ChIP-Seq PROSTATE CANCER Human	https://amp.pharm.mssm.edu/Enrichr	LARS2 ACAA1 RAD18 SEC22C FRMD4B LRIG1 LIMD1 ZFYVE9 CACNA2D3 PRKAA2 NEK10 CLASP2 SUCLG2 ATG7
0.0581626	14	1634	2.83065	Hsa-miR-181a-5p POSITIVE DOWN target gene	http://diana.imis.athena-innovation.gr/DianaTools	RBM6 NDC1 RAD18 GNAI2 TXNDC12 CTDSPL TMF1 CLASP2 SLMAP SETD5 GLYCTK RPL15 TRAK1 ZNF717
0.0608416	14	1662	2.78296	Hsa-miR-4668-5p target gene	http://mirdb.org	DOCK3 SEC22C TXNDC12 BTF3L4 VGLL4 CLASP2 ATXN7 PRICKLE2 ENTPD3 SETD5 TRAK1 ROBO2 FAF1 AGBL4
0.0710947	14	1710	2.70484	PCGF4 22325352 ChIP-Seq 293T-Rex Human	https://amp.pharm.mssm.edu/Enrichr	RAD18 HSPB11 DHCR24 SCP2 MRPL37 BTF3L4 VGLL4 CTDSPL ZFYVE9 SSBP3 PRKAA2 BTD FAF1 AGBL4
0.0733515	14	1730	2.67357	Adenyl ribonucleotide binding	http://amigo.geneontology.org/amigo/term/GO:0032559	LARS2 KIF9 ACTR8 SCP2 DHX30 IRAK2 PRKAA2 NEK10 SNRK RAD54L2 ENTPD3 GLYCTK SUCLG2 MAGI1
0.0746563	14	1736	2.66433	Muscle	https://amp.pharm.mssm.edu/Enrichr	RBM6 ALAS1 SCP2 MRPL37 ARL6IP5 PRKAA2 NEK10 PRICKLE2 SLMAP SETD5 PDCD6IP LAMB2 RPL15 FAF1
0.074826	14	1739	2.65973	CREB1 26743006 Chip-Seq LNCaP Human	https://amp.pharm.mssm.edu/Enrichr	HSPB11 DHCR24 BTF3L4 CTDSPL ARL6IP5 LRIG1 LIMD1 ZFYVE9 SSBP3 SLMAP RAD54L2 ACOX2 LAMB2 ANKRD28
0.0752651	14	1743	2.65363	Adenyl nucleotide binding	http://amigo.geneontology.org/amigo/term/GO:0030554	LARS2 KIF9 ACTR8 SCP2 DHX30 IRAK2 PRKAA2 NEK10 SNRK RAD54L2 ENTPD3 GLYCTK SUCLG2 MAGI1
0.0754282	14	1745	2.65059	CHD1 26751641 Chip-Seq LNCaP Human	https://amp.pharm.mssm.edu/Enrichr	RARB SCP2 BTF3L4 CTDSPL ARL6IP5 LRIG1 LIMD1 TSEN2 ZFYVE9 SSBP3 SLMAP PDCD6IP LAMB2 NKIRAS1
0.0814791	14	1777	2.60286	Hsa-miR-3146 predicted target gene	http://www.mirz.unibas.ch/ElMMo3	NDC1 DOCK3 DHCR24 BTF3L4 CTDSPL ARL6IP5 TMF1 PRKAA2 PRICKLE2 SNRK BSN MITF NKIRAS1 ANKRD28
0.0820154	14	1814	2.54977	Hsa-miR-660 predicted target gene	http://www.mirz.unibas.ch/ElMMo3	NDC1 RAD18 SEC22C FRMD4B SCP2 BTF3L4 CAND2 ZFYVE9 PRKAA2 ATXN7 TRAK1 AGBL4 ATG7 ANKRD28
0.0820154	14	1818	2.54416	Hsa-miR-296-3p predicted target gene	http://www.microrna.org/microrna/getDownloads.do	ACAA1 KIF9 SEC22C DHCR24 MRPL37 BTF3L4 CTDSPL LIMD1 TSEN2 SSBP3 CLASP2 PDCD6IP RPL15 AGBL4
0.0875933	14	1844	2.50828	Hsa-miR-337-3p predicted target gene	http://www.mirz.unibas.ch/ElMMo3	ACAA1 RAD18 DOCK3 DHCR24 SCP2 CTDSPL ARL6IP5 TMF1 PRKAA2 ATXN7 SLMAP SNRK GLYCTK AGBL4
0.0185306	13	1119	3.83816	MiR-186-5p target gene	http://www.targetscan.org	RAD18 DOCK3 FRMD4B TMF1 SSBP3 PRKAA2 ATXN7 RAD54L2 BTD PDCD6IP MITF ATG7 ANKRD28
0.0229063	13	1164	3.68978	MiR-186 target gene	http://www.targetscan.org	RAD18 DOCK3 FRMD4B TMF1 SSBP3 PRKAA2 ATXN7 RAD54L2 BTD PDCD6IP MITF ATG7 ANKRD28
0.0447458	13	1341	3.20276	GATA6 target gene	http://regulatorycircuits.org	RBM6 NDC1 ACAA1 RAD18 HSPB11 C3orf18 GNAI2 MRPL37 SSBP3 SLMAP ACOX2 RPL15 NKIRAS1
0.0508242	13	1379	3.1145	TBX4 target gene	http://regulatorycircuits.org	LARS2 NDC1 HSPB11 SCP2 MRPL37 TXNDC12 BTF3L4 LRIG1 LIMD1 ZFYVE9 SSBP3 BTD ANKRD28
0.054311	13	1407	3.05252	Hsa-miR-92a-3p target gene	http://mirtarbase.mbc.nctu.edu.tw	ACAA1 RRP9 DHCR24 DHX30 CTDSPL TMF1 LRIG1 LIMD1 SETD5 PDCD6IP SUCLG2 RPL15 FAF1
0.0581626	13	1442	2.97843	SOX5 target gene	http://regulatorycircuits.org	LARS2 ALAS1 NDC1 HSPB11 MRPL37 VGLL4 LIMD1 TSEN2 SSBP3 GNL3 GLYCTK BTD ANKRD28
0.0808937	13	1561	2.75138	ATF3 target gene	http://regulatorycircuits.org	LARS2 EMC3 IRAK2 VGLL4 CAND2 TMF1 LIMD1 TSEN2 PRKAA2 CLASP2 SNRK PDCD6IP ATG7
0.0814791	13	1581	2.71657	MiR-181-5p target gene	http://www.targetscan.org	TXNDC12 EMC3 VGLL4 CTDSPL TMF1 ATXN7 PRICKLE2 SLMAP PDCD6IP ROBO2 FAF1 MITF ATG7
0.0814791	13	1584	2.71143	Hsa-miR-548a-5p target gene	http://mirdb.org	NDC1 SEC22C BTF3L4 TMF1 SSBP3 CACNA2D3 PRKAA2 CLASP2 ATXN7 SLMAP PDCD6IP RPL15 ANKRD28
0.0814791	13	1589	2.70289	Hsa-miR-548ak target gene	http://mirdb.org	NDC1 SEC22C BTF3L4 TMF1 SSBP3 CACNA2D3 PRKAA2 CLASP2 ATXN7 SLMAP PDCD6IP RPL15 ANKRD28
0.0814791	13	1589	2.70289	Hsa-miR-548am-5p target gene	http://mirdb.org	NDC1 SEC22C BTF3L4 TMF1 SSBP3 CACNA2D3 PRKAA2 CLASP2 ATXN7 SLMAP PDCD6IP RPL15 ANKRD28
0.0814791	13	1586	2.70801	Hsa-miR-548ap-5p target gene	http://mirdb.org	NDC1 SEC22C BTF3L4 TMF1 SSBP3 CACNA2D3 PRKAA2 CLASP2 ATXN7 SLMAP PDCD6IP RPL15 ANKRD28
0.0814791	13	1586	2.70801	Hsa-miR-548as-5p target gene	http://mirdb.org	NDC1 SEC22C BTF3L4 TMF1 SSBP3 CACNA2D3 PRKAA2 CLASP2 ATXN7 SLMAP PDCD6IP RPL15 ANKRD28
0.0814791	13	1589	2.70289	Hsa-miR-548au-5p target gene	http://mirdb.org	NDC1 SEC22C BTF3L4 TMF1 SSBP3 CACNA2D3 PRKAA2 CLASP2 ATXN7 SLMAP PDCD6IP RPL15 ANKRD28
0.0814791	13	1589	2.70289	Hsa-miR-548c-5p target gene	http://mirdb.org	NDC1 SEC22C BTF3L4 TMF1 SSBP3 CACNA2D3 PRKAA2 CLASP2 ATXN7 SLMAP PDCD6IP RPL15 ANKRD28
0.0814791	13	1589	2.70289	Hsa-miR-548h-5p target gene	http://mirdb.org	NDC1 SEC22C BTF3L4 TMF1 SSBP3 CACNA2D3 PRKAA2 CLASP2 ATXN7 SLMAP PDCD6IP RPL15 ANKRD28
0.0814791	13	1587	2.7063	Hsa-miR-548i target gene	http://mirdb.org	NDC1 SEC22C BTF3L4 TMF1 SSBP3 CACNA2D3 PRKAA2 CLASP2 ATXN7 SLMAP PDCD6IP RPL15 ANKRD28
0.0814791	13	1586	2.70801	Hsa-miR-548j-5p target gene	http://mirdb.org	NDC1 SEC22C BTF3L4 TMF1 SSBP3 CACNA2D3 PRKAA2 CLASP2 ATXN7 SLMAP PDCD6IP RPL15 ANKRD28
0.0814791	13	1589	2.70289	Hsa-miR-548o-5p target gene	http://mirdb.org	NDC1 SEC22C BTF3L4 TMF1 SSBP3 CACNA2D3 PRKAA2 CLASP2 ATXN7 SLMAP PDCD6IP RPL15 ANKRD28
0.0814791	13	1589	2.70289	Hsa-miR-548w target gene	http://mirdb.org	NDC1 SEC22C BTF3L4 TMF1 SSBP3 CACNA2D3 PRKAA2 CLASP2 ATXN7 SLMAP PDCD6IP RPL15 ANKRD28
0.0815776	13	1590	2.70119	Hsa-miR-548ab target gene	http://mirdb.org	NDC1 SEC22C BTF3L4 TMF1 SSBP3 CACNA2D3 PRKAA2 CLASP2 ATXN7 SLMAP PDCD6IP RPL15 ANKRD28
0.0820154	13	1596	2.69104	Hsa-miR-548ad-5p target gene	http://mirdb.org	NDC1 SEC22C BTF3L4 TMF1 SSBP3 CACNA2D3 PRKAA2 CLASP2 ATXN7 SLMAP PDCD6IP RPL15 ANKRD28
0.0820154	13	1596	2.69104	Hsa-miR-548ae-5p target gene	http://mirdb.org	NDC1 SEC22C BTF3L4 TMF1 SSBP3 CACNA2D3 PRKAA2 CLASP2 ATXN7 SLMAP PDCD6IP RPL15 ANKRD28
0.0820154	13	1597	2.68935	Hsa-miR-548ar-5p target gene	http://mirdb.org	NDC1 SEC22C BTF3L4 TMF1 SSBP3 CACNA2D3 PRKAA2 CLASP2 ATXN7 SLMAP PDCD6IP RPL15 ANKRD28
0.0820154	13	1596	2.69104	Hsa-miR-548ay-5p target gene	http://mirdb.org	NDC1 SEC22C BTF3L4 TMF1 SSBP3 CACNA2D3 PRKAA2 CLASP2 ATXN7 SLMAP PDCD6IP RPL15 ANKRD28
0.0820154	13	1596	2.69104	Hsa-miR-548b-5p target gene	http://mirdb.org	NDC1 SEC22C BTF3L4 TMF1 SSBP3 CACNA2D3 PRKAA2 CLASP2 ATXN7 SLMAP PDCD6IP RPL15 ANKRD28
0.0820154	13	1596	2.69104	Hsa-miR-548bb-5p target gene	http://mirdb.org	NDC1 SEC22C BTF3L4 TMF1 SSBP3 CACNA2D3 PRKAA2 CLASP2 ATXN7 SLMAP PDCD6IP RPL15 ANKRD28
0.0820154	13	1596	2.69104	Hsa-miR-548d-5p target gene	http://mirdb.org	NDC1 SEC22C BTF3L4 TMF1 SSBP3 CACNA2D3 PRKAA2 CLASP2 ATXN7 SLMAP PDCD6IP RPL15 ANKRD28
0.0820154	13	1603	2.67929	Hsa-miR-548y target gene	http://mirdb.org	NDC1 SEC22C BTF3L4 TMF1 SSBP3 CACNA2D3 PRKAA2 CLASP2 ATXN7 SLMAP PDCD6IP RPL15 ANKRD28
0.0824084	13	1612	2.66433	TCF3/E2A 22897851 ChIP-Seq JUKARTE6-1 Human	https://amp.pharm.mssm.edu/Enrichr	LARS2 MRPL37 LRIG1 FGD5 SSBP3 FBLN2 SNRK BTD PDCD6IP ROBO2 FAF1 MITF ZNF717
0.0904169	13	1654	2.59667	Hsa-miR-559 target gene	http://mirdb.org	NDC1 SEC22C BTF3L4 TMF1 SSBP3 CACNA2D3 PRKAA2 CLASP2 ATXN7 SLMAP PDCD6IP RPL15 ANKRD28
0.0906592	13	1655	2.5951	Enzyme Inhibitors	http://ctd.mdibl.org	RBM6 MRPL37 TXNDC12 DHX30 TMF1 LIMD1 CLASP2 SLMAP GNL3 RAD54L2 PDCD6IP RPL15 FAF1
0.0931553	13	1662	2.58417	ATP binding	http://amigo.geneontology.org/amigo/term/GO:0005524	LARS2 KIF9 ACTR8 DHX30 IRAK2 PRKAA2 NEK10 SNRK RAD54L2 ENTPD3 GLYCTK SUCLG2 MAGI1
0.117838	13	1754	2.44863	XBP1 target gene	http://regulatorycircuits.org	LARS2 NDC1 HSPB11 ACTR8 MRPL37 CAND2 LIMD1 TSEN2 SSBP3 CACNA2D3 CLASP2 SNRK ENTPD3
0.117926	13	1757	2.44445	Hsa-miR-3671 target gene	http://mirdb.org	DOCK3 TXNDC12 BTF3L4 TMF1 LRIG1 ATXN7 PRICKLE2 SETD5 PDCD6IP SUCLG2 TRAK1 ROBO2 ZNF717
0.12465	13	1784	2.40745	Hsa-miR-323b-3p predicted target gene	http://www.mirz.unibas.ch/ElMMo3	RARB FRMD4B IRAK2 BTF3L4 PRKAA2 PRICKLE2 SLMAP ENTPD3 GLYCTK TRAK1 MITF NKIRAS1 ANKRD28
0.13725	13	1847	2.32534	Regulation of cell death	http://amigo.geneontology.org/amigo/term/GO:0010941	RAD18 RARB GNAI2 DHCR24 TXNDC12 ARL6IP5 TMF1 PRKAA2 ACOX2 PDCD6IP FAF1 MITF ATG7
0.172205	13	1952	2.20026	Hsa-miR-3074 predicted target gene	http://www.mirz.unibas.ch/ElMMo3	RAD18 RARB HSPB11 BTF3L4 CTDSPL CAND2 ARL6IP5 LRIG1 FGD5 CLASP2 ATXN7 NKIRAS1 ANKRD28
1.4125e-10	12	144	27.5314	Chr3p25	http://www.gsea-msigdb.org/gsea/msigdb/cards/chr3p25	RAD18 EMC3 IRAK2 VGLL4 CAND2 TSEN2 FGD5 FBLN2 SETD5 BTD ATG7 ANKRD28
0.000969284	12	624	6.3534	Hsa-miR-301b target gene	http://www.regnetworkweb.org/download/human.zip	DOCK3 TXNDC12 BTF3L4 VGLL4 LIMD1 ZFYVE9 PRICKLE2 SLMAP ENTPD3 ROBO2 MITF ANKRD28
0.00448617	12	776	5.10892	RODRIGUES THYROID CARCINOMA POORLY DIFFERENTIATED DN	http://www.gsea-msigdb.org/gsea/msigdb/cards/RODRIGUES_THYROID_CARCINOMA_POORLY_DIFFERENTIATED_DN	ACAA1 KIF9 VGLL4 TMF1 LRIG1 LIMD1 PRICKLE2 SNRK BTD RPL15 TRAK1 ANKRD28
0.0186219	12	968	4.09558	Hsa-miR-137 target gene	http://www.regnetworkweb.org/download/human.zip	CTDSPL TMF1 SSBP3 CLASP2 SLMAP SNRK BSN PDCD6IP RPL15 TRAK1 MITF ANKRD28
0.0266593	12	1044	3.79743	NR2F2 target gene	http://regulatorycircuits.org	ALAS1 NDC1 HSPB11 RRP9 SCP2 MRPL37 VGLL4 SSBP3 GLYCTK ACOX2 BTD ATG7
0.0733515	12	1325	2.99209	MiR-124-3p.2/506-3p target gene	http://www.targetscan.org	FRMD4B DHCR24 VGLL4 CTDSPL LRIG1 PRKAA2 PRICKLE2 SLMAP BSN RAD54L2 SUCLG2 MITF
0.0850381	12	1417	2.79783	Hsa-miR-130a-3p POSITIVE DOWN target gene	http://diana.imis.athena-innovation.gr/DianaTools	GNAI2 DHCR24 EMC3 DHX30 BTF3L4 VGLL4 LRIG1 ZFYVE9 SSBP3 SLMAP RAD54L2 SETD5
0.0912319	12	1450	2.73415	ZNF589 target gene	http://regulatorycircuits.org	RBM6 C3orf18 GNAI2 EMC3 IRAK2 VGLL4 LIMD1 TSEN2 FBLN2 SETD5 AMIGO3 ATG7
0.0936848	12	1456	2.72289	BARHL1 target gene	http://regulatorycircuits.org	ALAS1 RAD18 RARB ACTR8 FRMD4B VGLL4 ARL6IP5 TMF1 CACNA2D3 GNL3 GLYCTK ATG7
0.107642	12	1493	2.65541	MiR-181 target gene	http://www.targetscan.org	EMC3 VGLL4 CTDSPL TMF1 ATXN7 PRICKLE2 SLMAP PDCD6IP ROBO2 FAF1 MITF ATG7
0.110088	12	1519	2.60996	MiR-19 target gene	http://www.targetscan.org	DOCK3 BTF3L4 VGLL4 LRIG1 ZFYVE9 PRKAA2 NEK10 ATXN7 PRICKLE2 SLMAP BSN ROBO2
0.110088	12	1514	2.61857	LHX2-LIM/homeobox protein Lhx2 target gene	http://gtrd.biouml.org	RBM6 NDC1 ACAA1 KIF9 FRMD4B SCP2 TXNDC12 EMC3 SLMAP SETD5 GLYCTK FAF1
0.112083	12	1524	2.60139	MiR-19-3p target gene	http://www.targetscan.org	DOCK3 BTF3L4 VGLL4 LRIG1 ZFYVE9 PRKAA2 NEK10 ATXN7 PRICKLE2 SLMAP BSN ROBO2
0.117926	12	1542	2.57103	UBTF ENCODE	https://amp.pharm.mssm.edu/Enrichr	RBM6 GNAI2 DHCR24 IRAK2 TMF1 LIMD1 SSBP3 SLMAP SNRK GNL3 SETD5 FAF1
0.122134	12	1560	2.54136	HP:0011442 Abnormality of central motor function	https://hpo.jax.org/app/	DOCK3 DHCR24 SCP2 DHX30 TSEN2 SETD5 GLYCTK ACOX2 BTD LAMB2 TRAK1 MITF
0.12465	12	1568	2.52839	Hsa-miR-548aq-5p target gene	http://mirdb.org	NDC1 SEC22C BTF3L4 TMF1 CACNA2D3 PRKAA2 CLASP2 ATXN7 SLMAP PDCD6IP RPL15 ANKRD28
0.129376	12	1596	2.48404	HMX3 target gene	http://regulatorycircuits.org	ALAS1 RAD18 RARB ACTR8 EMC3 IRAK2 CACNA2D3 GNL3 GLYCTK ACOX2 BTD ANKRD28
0.129824	12	1598	2.48093	TCF4 target gene	http://regulatorycircuits.org	ALAS1 RRP9 VGLL4 LIMD1 TSEN2 PRKAA2 CLASP2 GNL3 GLYCTK PDCD6IP TRAK1 ATG7
0.142059	12	1640	2.41739	SREBF target gene	http://regulatorycircuits.org	LARS2 ALAS1 NDC1 HSPB11 RRP9 MRPL37 CTDSPL CAND2 TSEN2 SSBP3 GNL3 GLYCTK
0.142059	12	1643	2.41298	Hsa-miR-6124 target gene	http://mirdb.org	NDC1 RAD18 RARB SEC22C LIMD1 PRICKLE2 BSN RAD54L2 PDCD6IP SUCLG2 TRAK1 MITF
0.152405	12	1687	2.35004	BCL6 27268052 Chip-Seq Bcells Human	https://amp.pharm.mssm.edu/Enrichr	ALAS1 GNAI2 SCP2 DHX30 IRAK2 VGLL4 FGD5 GLYCTK RPL15 TRAK1 AGBL4 NKIRAS1
0.160793	12	1704	2.3266	MYB 26560356 Chip-Seq TH1 Human	https://amp.pharm.mssm.edu/Enrichr	C3orf18 MRPL37 TXNDC12 BTF3L4 CTDSPL ARL6IP5 ZFYVE9 SLMAP GNL3 RAD54L2 SETD5 RPL15
0.170985	12	1722	2.30228	RBPJ 21746931 ChIP-Seq IB4 Human	https://amp.pharm.mssm.edu/Enrichr	LARS2 HSPB11 DHCR24 SCP2 MRPL37 TXNDC12 BTF3L4 ZFYVE9 SSBP3 PRKAA2 FAF1 AGBL4
0.17221	12	1726	2.29694	GATA6 25053715 ChIP-Seq YYC3 Human	https://amp.pharm.mssm.edu/Enrichr	ALAS1 RAD18 RARB DHCR24 CTDSPL LRIG1 SSBP3 CACNA2D3 SNRK SETD5 GLYCTK FAF1
0.172666	12	1730	2.29163	AR 21915096 ChIP-Seq LNCaP-1F5 Human	https://amp.pharm.mssm.edu/Enrichr	LARS2 SEC22C DHCR24 LRIG1 LIMD1 ZFYVE9 SSBP3 GNL3 BSN RAD54L2 BTD TRAK1
0.173101	12	1731	2.29031	E2F2-Transcription factor E2F2 target gene	http://gtrd.biouml.org	RBM6 NDC1 ACAA1 SEC22C FRMD4B SCP2 MRPL37 EMC3 DHX30 LRIG1 SLMAP FAF1
0.187072	12	1760	2.25257	ELF3 26769127 Chip-Seq PDAC-Cell line Human	https://amp.pharm.mssm.edu/Enrichr	RAD18 HSPB11 DHCR24 MRPL37 BTF3L4 ARL6IP5 ZFYVE9 SSBP3 PRKAA2 SLMAP FAF1 AGBL4
0.19141	12	1772	2.23731	Hsa-miR-4262 target gene	http://mirdb.org	NDC1 TXNDC12 CTDSPL TMF1 ATXN7 PRICKLE2 SLMAP PDCD6IP SUCLG2 TRAK1 ROBO2 MITF
2.52467e-09	11	139	26.1449	Chr1p32	http://www.gsea-msigdb.org/gsea/msigdb/cards/chr1p32	NDC1 HSPB11 DHCR24 SCP2 MRPL37 TXNDC12 BTF3L4 ZFYVE9 SSBP3 PRKAA2 FAF1
6.41336e-05	11	378	9.61414	TCF4 18268006 ChIP-ChIP LS174T Human	https://amp.pharm.mssm.edu/Enrichr	LARS2 RAD18 KIF9 CTDSPL LIMD1 FGD5 SSBP3 CACNA2D3 SETD5 PDCD6IP TRAK1
0.00132954	11	556	6.53623	Hsa-miR-130a target gene	https://genie.weizmann.ac.il/pubs/mir07	DOCK3 BTF3L4 VGLL4 LRIG1 LIMD1 ZFYVE9 PRKAA2 PRICKLE2 SLMAP ROBO2 ANKRD28
0.00132954	11	556	6.53623	Hsa-miR-130b target gene	https://genie.weizmann.ac.il/pubs/mir07	DOCK3 BTF3L4 VGLL4 LRIG1 LIMD1 ZFYVE9 PRKAA2 PRICKLE2 SLMAP ROBO2 ANKRD28
0.00132954	11	556	6.53623	Hsa-miR-301a target gene	https://genie.weizmann.ac.il/pubs/mir07	DOCK3 BTF3L4 VGLL4 LRIG1 LIMD1 ZFYVE9 PRKAA2 PRICKLE2 SLMAP ROBO2 ANKRD28
0.00132954	11	556	6.53623	Hsa-miR-454 target gene	https://genie.weizmann.ac.il/pubs/mir07	DOCK3 BTF3L4 VGLL4 LRIG1 LIMD1 ZFYVE9 PRKAA2 PRICKLE2 SLMAP ROBO2 ANKRD28
0.0407317	11	947	3.83753	MiR-25/32/92 target gene	http://www.targetscan.org	RAD18 TMF1 SSBP3 PRKAA2 ATXN7 BSN SETD5 PDCD6IP RPL15 ROBO2 MITF
0.0425486	11	971	3.74268	MiR-130-3p/301-3p target gene	http://www.targetscan.org	RARB DOCK3 BTF3L4 VGLL4 LRIG1 ZFYVE9 PRKAA2 PRICKLE2 SLMAP ROBO2 ANKRD28
0.0608416	11	1083	3.35563	LBX2 target gene	http://regulatorycircuits.org	NDC1 HSPB11 FRMD4B MRPL37 VGLL4 ARL6IP5 TMF1 LIMD1 SSBP3 BTD ANKRD28
0.063133	11	1100	3.30377	MiR-130-3p/301-3p/454-3p target gene	http://www.targetscan.org	RARB DOCK3 BTF3L4 VGLL4 LRIG1 ZFYVE9 PRKAA2 PRICKLE2 SLMAP ROBO2 ANKRD28
0.0733515	11	1139	3.19065	MiR-130/301/454 target gene	http://www.targetscan.org	RARB DOCK3 BTF3L4 VGLL4 LRIG1 ZFYVE9 PRKAA2 PRICKLE2 SLMAP ROBO2 ANKRD28
0.0808937	11	1168	3.11143	NKX2-5-Homeobox protein Nkx-2.5 target gene	http://gtrd.biouml.org	ACAA1 RAD18 RARB GNAI2 FRMD4B SCP2 VGLL4 ACOX2 RPL15 MITF NKIRAS1
0.0852359	11	1221	2.97637	Hsa-miR-4672 target gene	http://mirdb.org	RAD18 RARB DOCK3 VGLL4 CACNA2D3 PRKAA2 CLASP2 GNL3 ROBO2 NKIRAS1 ZNF717
0.0884674	11	1239	2.93313	HMX2 target gene	http://regulatorycircuits.org	ALAS1 RARB ACTR8 RRP9 CACNA2D3 SLMAP GNL3 GLYCTK ACOX2 BTD ANKRD28
0.0937779	11	1258	2.88883	Hsa-miR-6733-5p target gene	http://mirdb.org	DHCR24 CTDSPL SSBP3 CLASP2 ATXN7 SLMAP SNRK RAD54L2 ENTPD3 FAF1 ANKRD28
0.107642	11	1293	2.81063	Bone	https://amp.pharm.mssm.edu/Enrichr	RBM6 GNAI2 DHCR24 SCP2 TXNDC12 ARL6IP5 FGD5 GNL3 LAMB2 RPL15 FAF1
0.117838	11	1333	2.72629	PAX target gene	http://regulatorycircuits.org	LARS2 NDC1 HSPB11 ACTR8 MRPL37 EMC3 IRAK2 SSBP3 PRKAA2 BTD ANKRD28
0.121387	11	1348	2.69595	Hsa-miR-19a-3p POSITIVE DOWN target gene	http://diana.imis.athena-innovation.gr/DianaTools	DHX30 BTF3L4 VGLL4 ARL6IP5 ZFYVE9 CLASP2 PRICKLE2 SLMAP SETD5 PDCD6IP RPL15
0.121387	11	1348	2.69595	TBX15 target gene	http://regulatorycircuits.org	NDC1 HSPB11 FRMD4B MRPL37 ARL6IP5 TMF1 LRIG1 SSBP3 ACOX2 BTD ANKRD28
0.124026	11	1357	2.67807	Hsa-miR-3714 target gene	http://mirdb.org	NDC1 SCP2 CTDSPL TMF1 LRIG1 PRKAA2 RAD54L2 ENTPD3 BTD SUCLG2 MITF
0.129255	11	1383	2.62773	Hsa-miR-509-3p predicted target gene	http://www.mirz.unibas.ch/ElMMo3	DOCK3 SCP2 VGLL4 LRIG1 LIMD1 SSBP3 ATXN7 PRICKLE2 ENTPD3 PDCD6IP ATG7
0.131133	11	1391	2.61261	Microtubule cytoskeleton	http://amigo.geneontology.org/amigo/term/GO:0015630	RAD18 HSPB11 KIF9 ACTR8 GNAI2 TSEN2 CLASP2 ATXN7 SLMAP PDCD6IP AGBL4
0.142059	11	1440	2.52371	MYC ENCODE	https://amp.pharm.mssm.edu/Enrichr	NDC1 RRP9 TXNDC12 BTF3L4 LIMD1 TSEN2 GNL3 RPL15 FAF1 NKIRAS1 ANKRD28
0.142059	11	1432	2.53781	TTGTTT V$FOXO4 01	https://amp.pharm.mssm.edu/Enrichr	RARB DHX30 VGLL4 ZFYVE9 SSBP3 CACNA2D3 SLMAP BSN ENTPD3 MITF ANKRD28
0.142059	11	1443	2.51846	Hsa-miR-23a-3p target gene	http://mirdb.org	RBM6 ALAS1 NDC1 DOCK3 CTDSPL LRIG1 NEK10 ATXN7 SNRK ROBO2 MITF
0.142059	11	1443	2.51846	Hsa-miR-23b-3p target gene	http://mirdb.org	RBM6 ALAS1 NDC1 DOCK3 CTDSPL LRIG1 NEK10 ATXN7 SNRK ROBO2 MITF
0.142059	11	1448	2.50977	Hsa-miR-23c target gene	http://mirdb.org	RBM6 ALAS1 NDC1 DOCK3 CTDSPL LRIG1 NEK10 ATXN7 SNRK ROBO2 MITF
0.169787	11	1499	2.42438	Hsa-miR-3065-5p target gene	http://mirdb.org	BTF3L4 VGLL4 ARL6IP5 LIMD1 SSBP3 SLMAP SNRK SETD5 SUCLG2 ROBO2 MITF
0.170003	11	1500	2.42276	MiR-15/16/195/424/497 target gene	http://www.targetscan.org	RBM6 RARB IRAK2 CTDSPL LRIG1 NEK10 SNRK PDCD6IP AMIGO3 TRAK1 FAF1
0.193712	11	1554	2.33857	MiR-27 target gene	http://www.targetscan.org	FRMD4B SCP2 CACNA2D3 PRKAA2 FBLN2 PRICKLE2 RAD54L2 SETD5 SUCLG2 MITF ATG7
0.194858	11	1556	2.33557	Hsa-miR-371-3p predicted target gene	http://www.mirz.unibas.ch/ElMMo3	LARS2 ACAA1 RAD18 DOCK3 LIMD1 FGD5 BSN GLYCTK TRAK1 NKIRAS1 ANKRD28
0.00448617	10	513	6.44009	TTTGCAC MIR19A MIR19B	http://www.gsea-msigdb.org/gsea/msigdb/cards/TTTGCAC_MIR19A_MIR19B	DOCK3 TXNDC12 BTF3L4 VGLL4 LRIG1 ZFYVE9 PRICKLE2 SLMAP BSN ROBO2
0.00717548	10	550	6.00685	Hsa-miR-7976 target gene	http://mirdb.org	DOCK3 C3orf18 SEC22C ACTR8 TMF1 LRIG1 CLASP2 BSN ENTPD3 GLYCTK
0.024717	10	706	4.67956	MiR-7 target gene	http://www.targetscan.org	FRMD4B DHCR24 CTDSPL LIMD1 PRKAA2 CLASP2 ATXN7 RAD54L2 ATG7 ANKRD28
0.047066	10	827	3.99488	HESX1 target gene	http://regulatorycircuits.org	ACTR8 FRMD4B VGLL4 ARL6IP5 TMF1 CACNA2D3 ENTPD3 BTD ATG7 ANKRD28
0.0486823	10	837	3.94715	Trachea	https://amp.pharm.mssm.edu/Enrichr	LARS2 FRMD4B DHCR24 SCP2 VGLL4 FGD5 NEK10 FBLN2 PDCD6IP RPL15
0.0528402	10	863	3.82824	Hsa-miR-561 target gene	https://genie.weizmann.ac.il/pubs/mir07	RBM6 RARB GNAI2 TXNDC12 SSBP3 SLMAP PDCD6IP ROBO2 MITF ANKRD28
0.0581626	10	892	3.70378	Hsa-miR-15a target gene	http://www.regnetworkweb.org/download/human.zip	RBM6 RARB DHX30 IRAK2 CTDSPL ARL6IP5 LRIG1 NEK10 SNRK PDCD6IP
0.0581626	10	898	3.67903	Hsa-miR-130b-3p POSITIVE DOWN target gene	http://diana.imis.athena-innovation.gr/DianaTools	GNAI2 DHCR24 DHX30 BTF3L4 VGLL4 LRIG1 ZFYVE9 PRICKLE2 SLMAP RAD54L2
0.0597797	10	904	3.65461	Hsa-miR-3666 target gene	http://mirdb.org	DOCK3 BTF3L4 VGLL4 LRIG1 ZFYVE9 PRKAA2 PRICKLE2 SLMAP ROBO2 ANKRD28
0.0608416	10	909	3.63451	Hsa-miR-301b-3p target gene	http://mirdb.org	DOCK3 BTF3L4 VGLL4 LRIG1 ZFYVE9 PRKAA2 PRICKLE2 SLMAP ROBO2 ANKRD28
0.0608416	10	909	3.63451	Hsa-miR-4295 target gene	http://mirdb.org	DOCK3 BTF3L4 VGLL4 LRIG1 ZFYVE9 PRKAA2 PRICKLE2 SLMAP ROBO2 ANKRD28
0.060852	10	913	3.61859	ERG 20517297 ChIP-Seq VCAP Human	https://amp.pharm.mssm.edu/Enrichr	LARS2 HSPB11 SEC22C ACTR8 TMF1 C3orf49 ENTPD3 BTD AGBL4 NKIRAS1
0.060852	10	913	3.61859	Hsa-miR-130b-3p target gene	http://mirdb.org	DOCK3 BTF3L4 VGLL4 LRIG1 ZFYVE9 PRKAA2 PRICKLE2 SLMAP ROBO2 ANKRD28
0.060852	10	912	3.62255	Hsa-miR-301a-3p target gene	http://mirdb.org	DOCK3 BTF3L4 VGLL4 LRIG1 ZFYVE9 PRKAA2 PRICKLE2 SLMAP ROBO2 ANKRD28
0.0615128	10	918	3.59888	Hsa-miR-130a-3p target gene	http://mirdb.org	DOCK3 BTF3L4 VGLL4 LRIG1 ZFYVE9 PRKAA2 PRICKLE2 SLMAP ROBO2 ANKRD28
0.0733515	10	952	3.47034	Hsa-miR-454-3p target gene	http://mirdb.org	DOCK3 BTF3L4 VGLL4 LRIG1 ZFYVE9 PRKAA2 PRICKLE2 SLMAP ROBO2 ANKRD28
0.0783567	10	978	3.37809	Microtubule-based process	http://amigo.geneontology.org/amigo/term/GO:0007017	HSPB11 KIF9 TMF1 PRKAA2 NEK10 CLASP2 ATXN7 PDCD6IP TRAK1 AGBL4
0.0814791	10	1002	3.29717	MiR-25/32/92/363 target gene	http://www.targetscan.org	TMF1 SSBP3 PRKAA2 ATXN7 BSN SETD5 PDCD6IP RPL15 ROBO2 MITF
0.0814791	10	1004	3.29061	Hsa-miR-30e-3p POSITIVE DOWN target gene	http://diana.imis.athena-innovation.gr/DianaTools	RBM6 DHCR24 SCP2 TXNDC12 BTF3L4 TMF1 ZFYVE9 SETD5 LAMB2 RPL15
0.0820154	10	1019	3.24217	MiR-25/32-5p/92-3p/363-3p/367 target gene	http://www.targetscan.org	TMF1 SSBP3 PRKAA2 ATXN7 BSN SETD5 PDCD6IP RPL15 ROBO2 MITF
0.0901787	10	1055	3.13153	MiR-145 target gene	http://www.targetscan.org	RAD18 C3orf18 BTF3L4 VGLL4 ARL6IP5 ZFYVE9 SSBP3 BSN BTD ANKRD28
0.102571	10	1084	3.04776	Hsa-miR-424 target gene	http://www.regnetworkweb.org/download/human.zip	RBM6 RARB IRAK2 CTDSPL LRIG1 NEK10 PRICKLE2 SNRK RAD54L2 PDCD6IP
0.107642	10	1094	3.0199	MiR-203/7194-5p target gene	http://www.targetscan.org	RARB DHX30 VGLL4 LIMD1 SSBP3 PRICKLE2 SLMAP BSN BTD ROBO2
0.107642	10	1098	3.0089	MiR-25-3p/32-5p/92-3p/363-3p/367-3p target gene	http://www.targetscan.org	TMF1 SSBP3 PRKAA2 ATXN7 BSN SETD5 PDCD6IP RPL15 ROBO2 MITF
0.107642	10	1097	3.01164	Hsa-miR-3153 target gene	http://mirdb.org	DHCR24 CTDSPL SSBP3 CLASP2 SLMAP SNRK RAD54L2 ENTPD3 FAF1 ANKRD28
0.10891	10	1103	2.99526	MiR-124-3p.2 target gene	http://www.targetscan.org	FRMD4B DHCR24 VGLL4 CTDSPL LRIG1 PRKAA2 SLMAP BSN SUCLG2 MITF
0.117926	10	1141	2.8955	Hsa-miR-3059-5p target gene	http://mirdb.org	DOCK3 C3orf18 FRMD4B EMC3 SSBP3 FBLN2 AMIGO3 AGBL4 ATG7 ANKRD28
0.117926	10	1139	2.90059	Hsa-miR-4310 target gene	http://mirdb.org	DOCK3 FRMD4B BTF3L4 PRKAA2 CLASP2 SLMAP SETD5 GLYCTK PDCD6IP ROBO2
0.129255	10	1179	2.80218	Hsa-miR-3180-5p target gene	http://mirdb.org	ALAS1 RAD18 DHCR24 CTDSPL SNRK SUCLG2 FAF1 NKIRAS1 ANKRD28 ZNF717
0.129255	10	1175	2.81172	Hsa-miR-4267 target gene	http://mirdb.org	LARS2 SEC22C EMC3 CTDSPL SSBP3 PRKAA2 CLASP2 ATXN7 GLYCTK ATG7
0.130046	10	1184	2.79034	Hsa-miR-4694-3p target gene	http://mirdb.org	DOCK3 FRMD4B TMF1 PRKAA2 FBLN2 PRICKLE2 SNRK PDCD6IP MITF ANKRD28
0.142059	10	1237	2.67079	MiR-15-5p/16-5p/195-5p/322-5p/497-5p target gene	http://www.targetscan.org	RBM6 RARB IRAK2 CTDSPL LRIG1 NEK10 SNRK PDCD6IP AMIGO3 TRAK1
0.142059	10	1230	2.68599	MiR-218-5p target gene	http://www.targetscan.org	SEC22C GNAI2 FRMD4B CTDSPL LRIG1 LIMD1 CLASP2 BSN ROBO2 MITF
0.142059	10	1236	2.67295	Hsa-miR-4668-3p target gene	http://mirdb.org	DOCK3 FRMD4B BTF3L4 LRIG1 SSBP3 CACNA2D3 PRKAA2 PDCD6IP TRAK1 ROBO2
0.147551	10	1249	2.64513	Hsa-miR-144-3p target gene	http://mirdb.org	RARB TMF1 ATXN7 SLMAP SETD5 PDCD6IP SUCLG2 ROBO2 MITF ANKRD28
0.159716	10	1270	2.60139	Hsa-miR-19b-3p POSITIVE DOWN target gene	http://diana.imis.athena-innovation.gr/DianaTools	BTF3L4 VGLL4 ARL6IP5 ZFYVE9 CLASP2 PRICKLE2 SLMAP SETD5 PDCD6IP RPL15
0.167947	10	1283	2.57503	Hsa-miR-6739-5p target gene	http://mirdb.org	DHCR24 CTDSPL SSBP3 CLASP2 SLMAP SNRK RAD54L2 ENTPD3 FAF1 ANKRD28
0.187072	10	1320	2.50285	MiR-302 target gene	http://www.targetscan.org	RARB FRMD4B DHX30 FGD5 NEK10 ATXN7 SNRK ROBO2 MITF ATG7
0.188675	10	1325	2.49341	ZNF217 24962896 ChIP-Seq MCF-7 Human	https://amp.pharm.mssm.edu/Enrichr	FRMD4B VGLL4 CTDSPL LRIG1 CACNA2D3 BTD SUCLG2 TRAK1 MITF ANKRD28
0.192263	10	1334	2.47659	POU3F2 20337985 ChIP-ChIP 501MEL Human	https://amp.pharm.mssm.edu/Enrichr	RARB TMF1 ZFYVE9 PRKAA2 NEK10 CLASP2 SNRK PDCD6IP MITF NKIRAS1
0.195348	10	1341	2.46366	MiR-203 target gene	http://www.targetscan.org	RARB DHX30 VGLL4 LIMD1 SSBP3 PRICKLE2 SLMAP BSN BTD ROBO2
0.195348	10	1340	2.4655	MiR-106-5p/17-5p/20-5p/93-5p/519 target gene	http://www.targetscan.org	RARB FRMD4B CTDSPL LRIG1 FGD5 ZFYVE9 NEK10 ATG7 NKIRAS1 ANKRD28
0.198258	10	1345	2.45633	Hsa-miR-203a-3p target gene	http://mirdb.org	RAD18 RARB SCP2 BTF3L4 VGLL4 ACKR2 SSBP3 PRKAA2 PRICKLE2 ROBO2
0.199835	10	1347	2.45269	Hsa-miR-302e target gene	http://mirdb.org	RAD18 SEC22C ACTR8 FRMD4B IRAK2 FGD5 SLMAP SNRK SETD5 ATG7
4.76579e-07	9	119	24.9865	Chr3p14	http://www.gsea-msigdb.org/gsea/msigdb/cards/chr3p14	FRMD4B ARL6IP5 TMF1 LRIG1 C3orf49 PRICKLE2 SLMAP ACOX2 SUCLG2
6.26116e-06	9	162	18.3543	Chr3p22	http://www.gsea-msigdb.org/gsea/msigdb/cards/chr3p22	ACAA1 SEC22C ACKR2 CTDSPL CLASP2 SNRK ENTPD3 PDCD6IP TRAK1
0.0252321	9	573	5.18916	Hsa-miR-4704-3p target gene	http://mirdb.org	ACTR8 SCP2 CACNA2D3 PRICKLE2 BSN SETD5 ATG7 NKIRAS1 ANKRD28
0.0407317	9	638	4.66049	MiR-7-5p target gene	http://www.targetscan.org	FRMD4B DHCR24 CTDSPL LIMD1 CLASP2 ATXN7 RAD54L2 ATG7 ANKRD28
0.0420039	9	650	4.57445	Hsa-miR-19a target gene	https://genie.weizmann.ac.il/pubs/mir07	DOCK3 BTF3L4 VGLL4 ZFYVE9 PRKAA2 PRICKLE2 SLMAP BSN ROBO2
0.0420039	9	650	4.57445	Hsa-miR-19b target gene	https://genie.weizmann.ac.il/pubs/mir07	DOCK3 BTF3L4 VGLL4 ZFYVE9 PRKAA2 PRICKLE2 SLMAP BSN ROBO2
0.057356	9	716	4.15278	Hsa-miR-6715a-3p target gene	http://mirdb.org	RAD18 ACTR8 GNAI2 BTF3L4 VGLL4 CAND2 CLASP2 ATXN7 TRAK1
0.0575171	9	717	4.14699	CREIGHTON ENDOCRINE THERAPY RESISTANCE 3	http://www.gsea-msigdb.org/gsea/msigdb/cards/CREIGHTON_ENDOCRINE_THERAPY_RESISTANCE_3	ALAS1 ACAA1 FRMD4B DHCR24 TMF1 LIMD1 GNL3 ENTPD3 TRAK1
0.0578471	9	719	4.13545	Hsa-miR-141-5p POSITIVE DOWN target gene	http://diana.imis.athena-innovation.gr/DianaTools	RBM6 ALAS1 VGLL4 TMF1 ZFYVE9 SLMAP SNRK RAD54L2 FAF1
0.0581626	9	733	4.05647	MiR-302-3p target gene	http://www.targetscan.org	RARB FRMD4B DHX30 FGD5 ATXN7 SNRK ROBO2 MITF ATG7
0.0746563	9	790	3.76379	ESX1 target gene	http://regulatorycircuits.org	ALAS1 RAD18 FRMD4B RRP9 ARL6IP5 TMF1 GLYCTK BTD ANKRD28
0.0796932	9	807	3.6845	Hsa-miR-525-5p target gene	http://mirdb.org	DOCK3 SEC22C BTF3L4 CTDSPL FGD5 SNRK SETD5 ANKRD28 ZNF717
0.0810043	9	811	3.66633	Hsa-miR-520a-5p target gene	http://mirdb.org	DOCK3 SEC22C BTF3L4 CTDSPL FGD5 SNRK SETD5 ANKRD28 ZNF717
0.0814791	9	828	3.59105	WAKABAYASHI ADIPOGENESIS PPARG RXRA BOUND 8D	http://www.gsea-msigdb.org/gsea/msigdb/cards/WAKABAYASHI_ADIPOGENESIS_PPARG_RXRA_BOUND_8D	ACAA1 SEC22C GNAI2 RRP9 TXNDC12 BTF3L4 SETD5 BTD TRAK1
0.0815776	9	830	3.5824	Hsa-miR-301b-3p POSITIVE DOWN target gene	http://diana.imis.athena-innovation.gr/DianaTools	GNAI2 DHX30 BTF3L4 VGLL4 LRIG1 ZFYVE9 PRICKLE2 SLMAP RAD54L2
0.0850381	9	851	3.494	Hsa-miR-30a-3p POSITIVE DOWN target gene	http://diana.imis.athena-innovation.gr/DianaTools	RBM6 DHCR24 TXNDC12 BTF3L4 TMF1 ZFYVE9 SETD5 LAMB2 RPL15
0.0875933	9	859	3.46146	Hsa-miR-7157-5p target gene	http://mirdb.org	DOCK3 FRMD4B BTF3L4 PRKAA2 CLASP2 SLMAP SETD5 GLYCTK PDCD6IP
0.0884674	9	868	3.42557	Microtubule organizing center	http://amigo.geneontology.org/amigo/term/GO:0005815	RAD18 HSPB11 ACTR8 GNAI2 TSEN2 CLASP2 SLMAP PDCD6IP AGBL4
0.0884674	9	869	3.42162	Hsa-miR-330-5p target gene	http://mirdb.org	NDC1 DOCK3 C3orf18 VGLL4 PRICKLE2 BSN RAD54L2 GLYCTK PDCD6IP
0.0937779	9	882	3.37119	Hsa-miR-497-3p target gene	http://mirdb.org	RARB FBLN2 CLASP2 ATXN7 PDCD6IP ROBO2 MITF ATG7 NKIRAS1
0.0937779	9	884	3.36356	Hsa-miR-6768-5p target gene	http://mirdb.org	LARS2 NDC1 RAD18 DOCK3 SCP2 PRKAA2 ATXN7 PRICKLE2 ZNF717
0.0984507	9	891	3.33714	E2F8 target gene	http://regulatorycircuits.org	LARS2 SCP2 EMC3 IRAK2 VGLL4 LRIG1 LIMD1 BTD ATG7
0.122211	9	959	3.10051	MiR-153-3p target gene	http://www.targetscan.org	ZFYVE9 SSBP3 CLASP2 ATXN7 BSN RAD54L2 ROBO2 FAF1 MITF
0.128294	9	970	3.06535	MiR-153 target gene	http://www.targetscan.org	ZFYVE9 SSBP3 CLASP2 ATXN7 BSN RAD54L2 ROBO2 FAF1 MITF
0.129255	9	980	3.03407	Organelle assembly	http://amigo.geneontology.org/amigo/term/GO:0070925	HSPB11 KIF9 DHX30 TMF1 LIMD1 PRKAA2 CLASP2 PDCD6IP ATG7
0.131716	9	992	2.99737	Hsa-miR-3916 target gene	http://mirdb.org	RARB GNAI2 TXNDC12 BTF3L4 VGLL4 SLMAP BSN BTD ZNF717
0.138507	9	1012	2.93813	Hsa-miR-3655 predicted target gene	http://www.mirz.unibas.ch/ElMMo3	C3orf18 FRMD4B DHCR24 PRKAA2 PRICKLE2 SETD5 GLYCTK FAF1 ANKRD28
0.142059	9	1025	2.90087	MiR-25/32/92/367 target gene	http://www.targetscan.org	TMF1 PRKAA2 ATXN7 BSN SETD5 PDCD6IP RPL15 ROBO2 MITF
0.142059	9	1019	2.91795	SIX5 ENCODE	https://amp.pharm.mssm.edu/Enrichr	RBM6 NDC1 RAD18 DHX30 SLMAP RPL15 MITF NKIRAS1 ZNF717
0.142059	9	1024	2.9037	SOX13 target gene	http://regulatorycircuits.org	LARS2 ALAS1 VGLL4 LIMD1 TSEN2 GNL3 GLYCTK BTD ANKRD28
0.142719	9	1040	2.85903	HMX1 target gene	http://regulatorycircuits.org	ALAS1 ACTR8 CACNA2D3 SLMAP GNL3 GLYCTK ACOX2 BTD ANKRD28
0.148361	9	1050	2.8318	MiR-145-5p target gene	http://www.targetscan.org	RAD18 BTF3L4 VGLL4 ARL6IP5 ZFYVE9 SSBP3 BSN BTD ANKRD28
0.158932	9	1065	2.79192	SPI1 20517297 ChIP-Seq HL60 Human	https://amp.pharm.mssm.edu/Enrichr	ALAS1 ACAA1 FRMD4B RRP9 GNL3 RAD54L2 ENTPD3 SUCLG2 RPL15
0.161701	9	1070	2.77887	Hsa-miR-6868-3p target gene	http://mirdb.org	RARB LIMD1 SSBP3 PRICKLE2 SLMAP RAD54L2 PDCD6IP TRAK1 NKIRAS1
0.163593	9	1073	2.7711	Hsa-miR-4760-3p target gene	http://mirdb.org	ALAS1 NDC1 DOCK3 BTF3L4 PRKAA2 ATXN7 SLMAP TRAK1 ROBO2
0.172205	9	1085	2.74045	Hsa-miR-301a-3p POSITIVE DOWN target gene	http://diana.imis.athena-innovation.gr/DianaTools	GNAI2 EMC3 DHX30 BTF3L4 VGLL4 LRIG1 ZFYVE9 SLMAP RAD54L2
0.17221	9	1086	2.73793	EMX2 target gene	http://regulatorycircuits.org	LARS2 RAD18 SCP2 TXNDC12 BTF3L4 LIMD1 ZFYVE9 BTD ANKRD28
0.17221	9	1086	2.73793	Hsa-miR-200a-3p target gene	http://mirdb.org	RARB SEC22C BTF3L4 TMF1 TSEN2 PRKAA2 CLASP2 ATXN7 ATG7
0.172666	9	1088	2.7329	Hsa-miR-141-3p target gene	http://mirdb.org	RARB SEC22C BTF3L4 TMF1 TSEN2 PRKAA2 CLASP2 ATXN7 ATG7
0.180275	9	1101	2.70063	MYC 20876797 ChIP-ChIP MEDULLOBLASTOMA Human	https://amp.pharm.mssm.edu/Enrichr	RARB KIF9 IRAK2 TMF1 TSEN2 PRKAA2 CLASP2 PDCD6IP FAF1
0.18216	9	1103	2.69573	Hsa-miR-3686 target gene	http://mirdb.org	NDC1 ACTR8 BTF3L4 TMF1 LRIG1 ZFYVE9 NEK10 ATG7 ANKRD28
0.188155	9	1115	2.66672	MiR-203a-3p.2 target gene	http://www.targetscan.org	RARB DHX30 VGLL4 LIMD1 SSBP3 PRICKLE2 SLMAP BSN ROBO2
0.188155	9	1115	2.66672	Negative regulation of cell death	http://amigo.geneontology.org/amigo/term/GO:0060548	RAD18 RARB GNAI2 DHCR24 TXNDC12 TMF1 PRKAA2 MITF ATG7
0.19141	9	1121	2.65245	Let-7-5p/miR-98 target gene	http://www.targetscan.org	DOCK3 FRMD4B BTF3L4 LIMD1 PRKAA2 CLASP2 BSN SUCLG2 ANKRD28
0.19141	9	1122	2.65008	Hsa-miR-1911 predicted target gene	http://www.mirz.unibas.ch/ElMMo3	TMF1 PRKAA2 ATXN7 PRICKLE2 BSN GLYCTK RPL15 TRAK1 ROBO2
0.199835	9	1136	2.61742	MiR-101-3p.2 target gene	http://www.targetscan.org	DOCK3 CTDSPL TMF1 SLMAP SETD5 ROBO2 MITF ATG7 ANKRD28
0.0185306	8	401	6.59106	TTGCACT MIR130A MIR301 MIR130B	http://www.gsea-msigdb.org/gsea/msigdb/cards/TTGCACT_MIR130A_MIR301_MIR130B	DOCK3 BTF3L4 VGLL4 LRIG1 ZFYVE9 SLMAP ROBO2 ANKRD28
0.047066	8	526	5.02474	ONKEN UVEAL MELANOMA DN	http://www.gsea-msigdb.org/gsea/msigdb/cards/ONKEN_UVEAL_MELANOMA_DN	LARS2 ACAA1 RARB CAND2 SNRK LAMB2 RPL15 TRAK1
0.047066	8	526	5.02474	RODRIGUES THYROID CARCINOMA ANAPLASTIC DN	http://www.gsea-msigdb.org/gsea/msigdb/cards/RODRIGUES_THYROID_CARCINOMA_ANAPLASTIC_DN	ACAA1 KIF9 FRMD4B VGLL4 TMF1 LRIG1 SNRK BTD
0.047499	8	530	4.98682	Hsa-miR-144 target gene	https://genie.weizmann.ac.il/pubs/mir07	RARB SCP2 VGLL4 SLMAP SETD5 SUCLG2 MITF ANKRD28
0.0552559	8	558	4.73659	DUX4 target gene	http://regulatorycircuits.org	ALAS1 RAD18 ACTR8 GNAI2 RRP9 VGLL4 GLYCTK ATG7
0.0597212	8	583	4.53347	Hsa-miR-196a-3p target gene	http://mirdb.org	RAD18 RARB DOCK3 SEC22C LIMD1 ATXN7 PRICKLE2 SETD5
0.0687757	8	610	4.33281	Hsa-miR-2115-5p target gene	http://mirdb.org	RAD18 RARB DOCK3 TXNDC12 BTF3L4 SSBP3 NEK10 RAD54L2
0.074826	8	630	4.19526	Hsa-miR-3128 target gene	http://mirdb.org	RAD18 DHCR24 CACNA2D3 NEK10 CLASP2 RAD54L2 SETD5 TRAK1
0.0754282	8	633	4.17538	Hsa-miR-506 target gene	https://genie.weizmann.ac.il/pubs/mir07	GNAI2 FRMD4B DHCR24 CTDSPL LRIG1 FGD5 PRKAA2 MITF
0.0763784	8	635	4.16223	Hsa-miR-124 target gene	https://genie.weizmann.ac.il/pubs/mir07	GNAI2 FRMD4B DHCR24 CTDSPL LRIG1 FGD5 PRKAA2 MITF
0.0763784	8	636	4.15568	WDR5 24793694 ChIP-Seq LNCAP Human	https://amp.pharm.mssm.edu/Enrichr	CTDSPL CAND2 ZFYVE9 PDCD6IP SUCLG2 AGBL4 NKIRAS1 ZNF717
0.0814791	8	652	4.0537	Hsa-miR-4325 target gene	http://mirdb.org	ACAA1 ATXN7 BSN SETD5 PDCD6IP RPL15 TRAK1 ROBO2
0.0820154	8	675	3.91558	Hsa-miR-676-5p target gene	http://mirdb.org	NDC1 FRMD4B TMF1 SLMAP ENTPD3 PDCD6IP MITF ANKRD28
0.0883392	8	692	3.81939	ENSG00000116030	https://www.innatedb.com	LARS2 TXNDC12 DHX30 LIMD1 ATXN7 RAD54L2 MITF ANKRD28
0.102448	8	723	3.65562	Nod2 21335489 hek293 lof human gpl570 gds4416 up	https://amp.pharm.mssm.edu/Enrichr	RAD18 SEC22C EMC3 TMF1 TSEN2 BTD ROBO2 ATG7
0.107642	8	735	3.59594	Hsa-miR-181d-5p POSITIVE DOWN target gene	http://diana.imis.athena-innovation.gr/DianaTools	RBM6 DOCK3 DHCR24 TXNDC12 BTF3L4 CTDSPL TMF1 SLMAP
0.107642	8	735	3.59594	Hsa-miR-16-1-3p target gene	http://mirdb.org	RAD18 DOCK3 SEC22C TMF1 PRKAA2 SLMAP ENTPD3 SETD5
0.109301	8	740	3.57164	Hsa-miR-6737-3p target gene	http://mirdb.org	DOCK3 C3orf18 SEC22C ARL6IP5 TMF1 LRIG1 ENTPD3 AGBL4
0.110088	8	748	3.53344	Hsa-miR-548h target gene	https://genie.weizmann.ac.il/pubs/mir07	DOCK3 BTF3L4 TMF1 LRIG1 CACNA2D3 CLASP2 SLMAP SNRK
0.110088	8	748	3.53344	Hsa-miR-548j target gene	https://genie.weizmann.ac.il/pubs/mir07	DOCK3 BTF3L4 TMF1 LRIG1 CACNA2D3 CLASP2 SLMAP SNRK
0.110088	8	746	3.54291	Hsa-miR-6828-5p target gene	http://mirdb.org	NDC1 RAD18 DHCR24 ACKR2 PRICKLE2 SNRK MITF ZNF717
0.110088	8	745	3.54767	Hsa-miR-7157-3p target gene	http://mirdb.org	DOCK3 C3orf18 SEC22C ARL6IP5 TMF1 LRIG1 ENTPD3 AGBL4
0.116456	8	760	3.47765	Hsa-miR-548av-3p target gene	http://mirdb.org	SCP2 BTF3L4 VGLL4 ATXN7 SLMAP TRAK1 ROBO2 ATG7
0.117926	8	768	3.44143	Hsa-miR-518c-5p target gene	http://mirdb.org	DOCK3 DHCR24 TMF1 PRICKLE2 BSN PDCD6IP AMIGO3 TRAK1
0.121919	8	775	3.41034	Hsa-miR-153-3p target gene	http://mirdb.org	FRMD4B ZFYVE9 SSBP3 ATXN7 BSN RAD54L2 ROBO2 MITF
0.122134	8	776	3.40595	Hsa-miR-557 target gene	http://mirdb.org	RAD18 DHCR24 VGLL4 CTDSPL TMF1 ATXN7 PDCD6IP ANKRD28
0.132996	8	810	3.26298	Hsa-miR-4713-5p target gene	http://mirdb.org	NDC1 SCP2 IRAK2 LIMD1 PRKAA2 ATXN7 PRICKLE2 BSN
0.133873	8	812	3.25494	Hsa-miR-3191-5p target gene	http://mirdb.org	NDC1 DOCK3 TMF1 ATXN7 PRICKLE2 BSN PDCD6IP AMIGO3
0.138507	8	824	3.20754	Hsa-miR-607 target gene	https://genie.weizmann.ac.il/pubs/mir07	DOCK3 TMF1 PRKAA2 CLASP2 PRICKLE2 SETD5 PDCD6IP TRAK1
0.142059	8	836	3.1615	Hsa-miR-148a-3p target gene	http://mirdb.org	MRPL37 LIMD1 PRICKLE2 SNRK LAMB2 TRAK1 ROBO2 MITF
0.142059	8	837	3.15772	Hsa-miR-148b-3p target gene	http://mirdb.org	MRPL37 LIMD1 PRICKLE2 SNRK LAMB2 TRAK1 ROBO2 MITF
0.142059	8	835	3.16529	Hsa-miR-152-3p target gene	http://mirdb.org	MRPL37 LIMD1 PRICKLE2 SNRK LAMB2 TRAK1 ROBO2 MITF
0.143195	8	849	3.11309	DACOSTA UV RESPONSE VIA ERCC3 DN	http://www.gsea-msigdb.org/gsea/msigdb/cards/DACOSTA_UV_RESPONSE_VIA_ERCC3_DN	RBM6 LARS2 LRIG1 ZFYVE9 CLASP2 TRAK1 MITF ANKRD28
0.145857	8	852	3.10213	Hsa-miR-6887-3p target gene	http://mirdb.org	DOCK3 C3orf18 GNAI2 LRIG1 PRICKLE2 RAD54L2 SETD5 TRAK1
0.147551	8	854	3.09486	CTTTGA V$LEF1 Q2	https://amp.pharm.mssm.edu/Enrichr	RARB DOCK3 DHCR24 VGLL4 ZFYVE9 LAMB2 MITF ANKRD28
0.14949	8	859	3.07685	Hsa-miR-4470 target gene	http://mirdb.org	BTF3L4 VGLL4 ARL6IP5 LRIG1 CACNA2D3 CLASP2 SLMAP MITF
0.158525	8	870	3.03795	Hsa-miR-7-5p target gene	http://mirdb.org	NDC1 FRMD4B VGLL4 CTDSPL LIMD1 CLASP2 RAD54L2 RPL15
0.16017	8	873	3.02751	Hsa-miR-18a-5p POSITIVE DOWN target gene	http://diana.imis.athena-innovation.gr/DianaTools	SEC22C DHCR24 TXNDC12 BTF3L4 VGLL4 SNRK BSN SETD5
0.16017	8	873	3.02751	Hsa-miR-1343-3p target gene	http://mirdb.org	IRAK2 BTF3L4 LIMD1 PRICKLE2 RAD54L2 TRAK1 MITF ATG7
0.172205	8	888	2.97637	Hsa-miR-507 target gene	http://mirdb.org	RAD18 DHCR24 VGLL4 CTDSPL TMF1 ATXN7 PDCD6IP ANKRD28
0.176332	8	897	2.9465	Hsa-miR-150-5p target gene	http://mirdb.org	NDC1 SEC22C IRAK2 LIMD1 PRICKLE2 BSN SETD5 GLYCTK
0.188675	8	916	2.88539	Hsa-let-7d-5p target gene	http://mirdb.org	DOCK3 FRMD4B LIMD1 PRKAA2 CLASP2 BSN SUCLG2 ANKRD28
0.19186	8	922	2.86661	Hsa-miR-4458 target gene	http://mirdb.org	DOCK3 FRMD4B LIMD1 PRKAA2 CLASP2 BSN SUCLG2 ANKRD28
0.0185306	7	292	7.91999	Hsa-miR-214 target gene	https://genie.weizmann.ac.il/pubs/mir07	GNAI2 SCP2 SSBP3 PRICKLE2 BSN SETD5 MITF
0.026386	7	329	7.02929	Hsa-miR-802 target gene	http://www.regnetworkweb.org/download/human.zip	RBM6 SEC22C TXNDC12 BTF3L4 ZFYVE9 CLASP2 RAD54L2
0.0407317	7	371	6.23352	Accessory olfactory bulb	https://amp.pharm.mssm.edu/Enrichr	ALAS1 ARL6IP5 CACNA2D3 ENTPD3 BTD LAMB2 ANKRD28
0.0433044	7	383	6.03822	CLOCK 20551151 ChIP-Seq 293T Human	https://amp.pharm.mssm.edu/Enrichr	ALAS1 BTF3L4 SNRK GNL3 BSN PDCD6IP TRAK1
0.0499282	7	402	5.75283	Hsa-miR-579 target gene	https://genie.weizmann.ac.il/pubs/mir07	TMF1 PRKAA2 PRICKLE2 SLMAP SETD5 TRAK1 MITF
0.0516086	7	409	5.65437	MiR-148-3p target gene	http://www.targetscan.org	SSBP3 PRKAA2 PRICKLE2 SNRK ROBO2 FAF1 MITF
0.0581626	7	436	5.30421	GGATTA V$PITX2 Q2	https://amp.pharm.mssm.edu/Enrichr	RARB DHX30 PRICKLE2 SLMAP ENTPD3 MITF ANKRD28
0.0733515	7	471	4.91006	MiR-365-3p target gene	http://www.targetscan.org	FRMD4B BTF3L4 VGLL4 ATXN7 SNRK RAD54L2 ANKRD28
0.0814791	7	501	4.61604	ZNF589 SIRNA BT549 HUMAN GSE79586 RNASEQ UP	https://amp.pharm.mssm.edu/Enrichr	GNAI2 ARL6IP5 FBLN2 SETD5 PDCD6IP RPL15 ANKRD28
0.0842948	7	523	4.42187	Hsa-miR-2682-5p target gene	http://mirdb.org	NDC1 CTDSPL LRIG1 PRKAA2 RAD54L2 ENTPD3 MITF
0.104323	7	562	4.11501	Hsa-miR-451 predicted target gene	http://www.microrna.org/microrna/getDownloads.do	RAD18 CAND2 ARL6IP5 CACNA2D3 PRICKLE2 SETD5 TRAK1
0.106694	7	565	4.09316	Hsa-miR-671-5p POSITIVE DOWN target gene	http://diana.imis.athena-innovation.gr/DianaTools	SEC22C GNAI2 DHCR24 SCP2 LIMD1 SNRK SUCLG2
0.107642	7	568	4.07155	Hsa-miR-135a target gene	http://www.regnetworkweb.org/download/human.zip	RARB VGLL4 FGD5 CACNA2D3 SNRK BSN SUCLG2
0.10768	7	570	4.05726	Hsa-miR-520a-3p target gene	http://www.regnetworkweb.org/download/human.zip	KIF9 FRMD4B TMF1 LRIG1 TSEN2 FGD5 SNRK
0.108595	7	572	4.04307	MiR-132-3p/212-3p target gene	http://www.targetscan.org	PRKAA2 ATXN7 PRICKLE2 BSN RAD54L2 SETD5 MITF
0.110088	7	576	4.015	Hsa-miR-187 predicted target gene	http://www.mirz.unibas.ch/ElMMo3	RAD18 DHCR24 CTDSPL PRKAA2 FBLN2 ATXN7 AGBL4
0.110088	7	581	3.98044	Hsa-miR-125b-2-3p target gene	http://mirdb.org	TSEN2 BSN RAD54L2 SETD5 ATG7 NKIRAS1 ANKRD28
0.11323	7	586	3.94648	Hsa-miR-542-3p target gene	http://mirdb.org	RAD18 DHCR24 SLMAP SUCLG2 FAF1 MITF ANKRD28
0.115793	7	590	3.91972	MiR-221-3p/222-3p target gene	http://www.targetscan.org	GNAI2 VGLL4 TMF1 ATXN7 FAF1 MITF ATG7
0.117583	7	593	3.89989	Hsa-miR-6882-5p target gene	http://mirdb.org	SEC22C FGD5 ZFYVE9 SLMAP SNRK SETD5 MITF
0.117926	7	594	3.89333	GGATTA PITX2 Q2	http://www.gsea-msigdb.org/gsea/msigdb/cards/GGATTA_PITX2_Q2	RARB DHX30 PRICKLE2 SLMAP ENTPD3 MITF ANKRD28
0.123635	7	608	3.80368	Hsa-miR-145 target gene	http://www.regnetworkweb.org/download/human.zip	BTF3L4 VGLL4 ZFYVE9 SSBP3 BSN ROBO2 ANKRD28
0.128294	7	614	3.76651	Hsa-miR-6079 target gene	http://mirdb.org	VGLL4 TMF1 PRICKLE2 SNRK ROBO2 AGBL4 MITF
0.131013	7	629	3.67669	Hsa-miR-4436b-5p target gene	http://mirdb.org	RARB SEC22C SLMAP RAD54L2 ENTPD3 SETD5 ROBO2
0.133625	7	635	3.64195	Amiodarone	http://ctd.mdibl.org	ALAS1 C3orf18 IRAK2 FGD5 PRKAA2 MITF ATG7
0.134425	7	637	3.63051	Hsa-miR-520f-3p target gene	http://mirdb.org	RARB DOCK3 FRMD4B FGD5 ATXN7 SLMAP TRAK1
0.136904	7	643	3.59664	Hsa-miR-7155-5p target gene	http://mirdb.org	LARS2 ALAS1 SSBP3 RAD54L2 GLYCTK PDCD6IP LAMB2
0.138507	7	647	3.5744	Hsa-miR-15b target gene	https://genie.weizmann.ac.il/pubs/mir07	RBM6 RARB IRAK2 CTDSPL LRIG1 SNRK PDCD6IP
0.138507	7	647	3.5744	Hsa-miR-16 target gene	https://genie.weizmann.ac.il/pubs/mir07	RBM6 RARB IRAK2 CTDSPL LRIG1 SNRK PDCD6IP
0.138507	7	647	3.5744	Hsa-miR-195 target gene	https://genie.weizmann.ac.il/pubs/mir07	RBM6 RARB IRAK2 CTDSPL LRIG1 SNRK PDCD6IP
0.138507	7	647	3.5744	Hsa-miR-497 target gene	https://genie.weizmann.ac.il/pubs/mir07	RBM6 RARB IRAK2 CTDSPL LRIG1 SNRK PDCD6IP
0.147551	7	673	3.43631	Hsa-miR-4451 target gene	http://mirdb.org	TMF1 CLASP2 SLMAP SUCLG2 ROBO2 MITF ANKRD28
0.148361	7	675	3.42613	Hsa-miR-5008-3p target gene	http://mirdb.org	DOCK3 C3orf18 SEC22C ARL6IP5 TMF1 LRIG1 AGBL4
0.161934	7	691	3.3468	Axon	http://amigo.geneontology.org/amigo/term/GO:0030424	PRKAA2 CLASP2 BSN TRAK1 ROBO2 AGBL4 ATG7
0.167261	7	696	3.32276	Hsa-miR-140-3p target gene	http://mirdb.org	NDC1 DOCK3 SCP2 PRKAA2 BSN TRAK1 ROBO2
0.169787	7	699	3.30849	Hsa-miR-186 target gene	https://genie.weizmann.ac.il/pubs/mir07	DOCK3 FRMD4B TMF1 CLASP2 PRICKLE2 PDCD6IP MITF
0.17221	7	703	3.28967	Hsa-miR-20a-3p POSITIVE DOWN target gene	http://diana.imis.athena-innovation.gr/DianaTools	ARL6IP5 SNRK SETD5 PDCD6IP SUCLG2 FAF1 ANKRD28
0.172666	7	705	3.28034	Hsa-miR-181a target gene	https://genie.weizmann.ac.il/pubs/mir07	CTDSPL TMF1 PRICKLE2 SLMAP PDCD6IP TRAK1 ROBO2
0.172666	7	705	3.28034	Hsa-miR-181b target gene	https://genie.weizmann.ac.il/pubs/mir07	CTDSPL TMF1 PRICKLE2 SLMAP PDCD6IP TRAK1 ROBO2
0.172666	7	705	3.28034	Hsa-miR-181c target gene	https://genie.weizmann.ac.il/pubs/mir07	CTDSPL TMF1 PRICKLE2 SLMAP PDCD6IP TRAK1 ROBO2
0.172666	7	705	3.28034	Hsa-miR-181d target gene	https://genie.weizmann.ac.il/pubs/mir07	CTDSPL TMF1 PRICKLE2 SLMAP PDCD6IP TRAK1 ROBO2
0.173206	7	706	3.27569	YTATTTTNR MEF2 02	http://www.gsea-msigdb.org/gsea/msigdb/cards/YTATTTTNR_MEF2_02	ARL6IP5 CACNA2D3 PRKAA2 SLMAP LAMB2 MITF ANKRD28
0.174093	7	707	3.27106	Hsa-miR-4742-5p target gene	http://mirdb.org	VGLL4 SSBP3 PRKAA2 ATXN7 SLMAP SETD5 NKIRAS1
0.17595	7	709	3.26183	Hsa-miR-6720-5p target gene	http://mirdb.org	SEC22C DHCR24 ACKR2 LRIG1 RAD54L2 RPL15 FAF1
0.176859	7	711	3.25265	Hsa-miR-6512-3p target gene	http://mirdb.org	SEC22C DHCR24 ACKR2 LRIG1 RAD54L2 RPL15 FAF1
0.184106	7	719	3.21646	Hsa-miR-6516-5p target gene	http://mirdb.org	GNAI2 TMF1 FGD5 PRKAA2 ROBO2 MITF ANKRD28
0.186894	7	722	3.2031	Let-7-5p target gene	http://www.targetscan.org	DOCK3 FRMD4B BTF3L4 PRKAA2 CLASP2 BSN SUCLG2
0.188675	7	727	3.18107	Hsa-miR-4778-5p target gene	http://mirdb.org	NDC1 ACTR8 BTF3L4 TMF1 ZFYVE9 NEK10 ROBO2
0.192263	7	733	3.15503	SREBF2 target gene	http://www.regnetworkweb.org/download/human.zip	VGLL4 ZFYVE9 CLASP2 SLMAP SETD5 PDCD6IP NKIRAS1
0.00132954	6	107	18.5258	ECHS1	http://www.pathwaycommons.org/archives/PC2/v12/PathwayCommons12.reconx.hgnc.txt.gz	ACAA1 DHCR24 SCP2 ENTPD3 GLYCTK SUCLG2
0.00132954	6	100	19.8226	TUBA8	http://www.pathwaycommons.org/archives/PC2/v12/PathwayCommons12.reconx.hgnc.txt.gz	ACAA1 DHCR24 SCP2 ENTPD3 GLYCTK SUCLG2
0.0143478	6	173	11.4582	ACSL4	http://www.pathwaycommons.org/archives/PC2/v12/PathwayCommons12.reconx.hgnc.txt.gz	ACAA1 SCP2 ENTPD3 GLYCTK ACOX2 SUCLG2
0.0163402	6	181	10.9517	ACSL3	http://www.pathwaycommons.org/archives/PC2/v12/PathwayCommons12.reconx.hgnc.txt.gz	ACAA1 SCP2 ENTPD3 GLYCTK ACOX2 SUCLG2
0.0174588	6	185	10.7149	ACSL1	http://www.pathwaycommons.org/archives/PC2/v12/PathwayCommons12.reconx.hgnc.txt.gz	ACAA1 SCP2 ENTPD3 GLYCTK ACOX2 SUCLG2
0.0185306	6	197	10.0622	Hsa-miR-8063 target gene	http://mirtarbase.mbc.nctu.edu.tw	SEC22C EMC3 BTF3L4 CTDSPL LIMD1 SETD5
0.0332086	6	239	8.29398	Hsa-miR-194 target gene	https://genie.weizmann.ac.il/pubs/mir07	BTF3L4 CTDSPL ZFYVE9 CLASP2 SETD5 MITF
0.0407317	6	256	7.74321	MiR-130/301 target gene	http://www.targetscan.org	BTF3L4 VGLL4 ZFYVE9 PRICKLE2 SLMAP ROBO2
0.0508242	6	284	6.97979	Layer 4 of PaS	https://amp.pharm.mssm.edu/Enrichr	MRPL37 BTF3L4 CAND2 FBLN2 AGBL4 ZNF717
0.0513397	6	286	6.93098	Accessory olfactory bulb granular layer	https://amp.pharm.mssm.edu/Enrichr	ALAS1 ARL6IP5 CACNA2D3 ENTPD3 BTD LAMB2
0.0513397	6	286	6.93098	IGROV-1 cell	https://amp.pharm.mssm.edu/Enrichr	RBM6 RAD18 IRAK2 TSEN2 PRKAA2 AGBL4
0.0516086	6	290	6.83538	Subethmoid nucleus	https://amp.pharm.mssm.edu/Enrichr	CTDSPL SSBP3 PRKAA2 GLYCTK SUCLG2 MITF
0.0573519	6	300	6.60754	BRUINS UVC RESPONSE EARLY LATE	http://www.gsea-msigdb.org/gsea/msigdb/cards/BRUINS_UVC_RESPONSE_EARLY_LATE	RBM6 RAD18 ACTR8 CTDSPL LRIG1 PRICKLE2
0.0578471	6	302	6.56378	Hsa-miR-605-5p POSITIVE DOWN target gene	http://diana.imis.athena-innovation.gr/DianaTools	DHCR24 BTF3L4 CTDSPL TMF1 RAD54L2 SETD5
0.0733515	6	342	5.79608	Hsa-let-7a target gene	https://genie.weizmann.ac.il/pubs/mir07	DOCK3 FRMD4B BTF3L4 PRKAA2 CLASP2 ANKRD28
0.0733515	6	342	5.79608	Hsa-let-7b target gene	https://genie.weizmann.ac.il/pubs/mir07	DOCK3 FRMD4B BTF3L4 PRKAA2 CLASP2 ANKRD28
0.0733515	6	342	5.79608	Hsa-let-7c target gene	https://genie.weizmann.ac.il/pubs/mir07	DOCK3 FRMD4B BTF3L4 PRKAA2 CLASP2 ANKRD28
0.0733515	6	342	5.79608	Hsa-let-7d target gene	https://genie.weizmann.ac.il/pubs/mir07	DOCK3 FRMD4B BTF3L4 PRKAA2 CLASP2 ANKRD28
0.0733515	6	342	5.79608	Hsa-let-7e target gene	https://genie.weizmann.ac.il/pubs/mir07	DOCK3 FRMD4B BTF3L4 PRKAA2 CLASP2 ANKRD28
0.0733515	6	342	5.79608	Hsa-let-7f target gene	https://genie.weizmann.ac.il/pubs/mir07	DOCK3 FRMD4B BTF3L4 PRKAA2 CLASP2 ANKRD28
0.0733515	6	342	5.79608	Hsa-let-7g target gene	https://genie.weizmann.ac.il/pubs/mir07	DOCK3 FRMD4B BTF3L4 PRKAA2 CLASP2 ANKRD28
0.0733515	6	342	5.79608	Hsa-let-7i target gene	https://genie.weizmann.ac.il/pubs/mir07	DOCK3 FRMD4B BTF3L4 PRKAA2 CLASP2 ANKRD28
0.0733515	6	342	5.79608	Hsa-miR-98 target gene	https://genie.weizmann.ac.il/pubs/mir07	DOCK3 FRMD4B BTF3L4 PRKAA2 CLASP2 ANKRD28
0.0733515	6	342	5.79608	AR target gene	http://www.regnetworkweb.org/download/human.zip	ACAA1 RARB IRAK2 TMF1 RAD54L2 ACOX2
0.0814791	6	358	5.53704	Hsa-miR-148b-5p POSITIVE DOWN target gene	http://diana.imis.athena-innovation.gr/DianaTools	TXNDC12 VGLL4 PRKAA2 RPL15 NKIRAS1 ZNF717
0.0820154	6	375	5.28603	MiR-10 target gene	http://www.targetscan.org	SEC22C CTDSPL PRKAA2 CLASP2 ATXN7 BSN
0.0835776	6	378	5.24408	Hsa-miR-581 target gene	http://mirdb.org	C3orf18 GNAI2 EMC3 PRICKLE2 SETD5 TRAK1
0.0841737	6	379	5.23024	Hsa-miR-18a-5p target gene	http://mirdb.org	SEC22C BTF3L4 CTDSPL CLASP2 ATXN7 ROBO2
0.0841737	6	379	5.23024	Hsa-miR-18b-5p target gene	http://mirdb.org	SEC22C BTF3L4 CTDSPL CLASP2 ATXN7 ROBO2
0.0852359	6	382	5.18916	Mitochondrial matrix	https://amp.pharm.mssm.edu/Enrichr	LARS2 ALAS1 MRPL37 DHX30 BTD SUCLG2
0.0875933	6	385	5.14873	Hsa-miR-1284 target gene	https://genie.weizmann.ac.il/pubs/mir07	DOCK3 FRMD4B PRICKLE2 SNRK ROBO2 MITF
0.0912319	6	396	5.00571	MicroCosm Targets hsa-miR-377	https://genesetdb.auckland.ac.nz	RBM6 KIF9 TSEN2 SSBP3 GLYCTK AGBL4
0.0937625	6	399	4.96807	Microtubule-based movement	http://amigo.geneontology.org/amigo/term/GO:0007018	HSPB11 KIF9 TMF1 NEK10 TRAK1 AGBL4
0.104563	6	412	4.81131	Hsa-miR-377 target gene	https://genie.weizmann.ac.il/pubs/mir07	DHCR24 PRKAA2 PRICKLE2 BSN SETD5 MITF
0.107915	6	419	4.73093	RUTELLA RESPONSE TO HGF UP	http://www.gsea-msigdb.org/gsea/msigdb/cards/RUTELLA_RESPONSE_TO_HGF_UP	ALAS1 C3orf18 DHCR24 ARL6IP5 PDCD6IP MITF
0.109182	6	421	4.70846	Guanosine triphosphate (HMDB01273)	https://amp.pharm.mssm.edu/Enrichr	DOCK3 FGD5 GNL3 ENTPD3 SUCLG2 NKIRAS1
0.110088	6	425	4.66414	Hsa-miR-6794-3p target gene	http://mirdb.org	RARB FRMD4B EMC3 TMF1 LIMD1 ROBO2
0.113696	6	432	4.58857	PKCTHETA 26484144 Chip-Seq BREAST Human	https://amp.pharm.mssm.edu/Enrichr	DOCK3 TSEN2 PRICKLE2 PDCD6IP ROBO2 ATG7
0.116456	6	436	4.54647	Hsa-miR-32 target gene	https://genie.weizmann.ac.il/pubs/mir07	TMF1 BSN SETD5 RPL15 ROBO2 ANKRD28
0.117926	6	440	4.50514	Hsa-miR-25 target gene	https://genie.weizmann.ac.il/pubs/mir07	TMF1 BSN SETD5 RPL15 ROBO2 ANKRD28
0.117926	6	440	4.50514	Hsa-miR-363 target gene	https://genie.weizmann.ac.il/pubs/mir07	TMF1 BSN SETD5 RPL15 ROBO2 ANKRD28
0.117926	6	440	4.50514	Hsa-miR-367 target gene	https://genie.weizmann.ac.il/pubs/mir07	TMF1 BSN SETD5 RPL15 ROBO2 ANKRD28
0.117926	6	440	4.50514	Hsa-miR-92a target gene	https://genie.weizmann.ac.il/pubs/mir07	TMF1 BSN SETD5 RPL15 ROBO2 ANKRD28
0.117926	6	440	4.50514	Hsa-miR-92b target gene	https://genie.weizmann.ac.il/pubs/mir07	TMF1 BSN SETD5 RPL15 ROBO2 ANKRD28
0.117926	6	439	4.5154	Hsa-miR-3614-5p target gene	http://mirdb.org	GNAI2 LIMD1 SNRK BSN PDCD6IP ANKRD28
0.117954	6	442	4.48475	Hsa-miR-139-5p POSITIVE DOWN target gene	http://diana.imis.athena-innovation.gr/DianaTools	GNAI2 TMF1 CLASP2 SETD5 RPL15 ROBO2
0.121857	6	446	4.44453	MiR-365 target gene	http://www.targetscan.org	BTF3L4 VGLL4 ATXN7 SNRK RAD54L2 ANKRD28
0.122134	6	447	4.43459	Hsa-miR-4763-5p target gene	http://mirdb.org	LARS2 VGLL4 CLASP2 BSN SETD5 GLYCTK
0.128517	6	455	4.35662	Hsa-miR-4645-3p target gene	http://mirdb.org	RAD18 LRIG1 ATXN7 SLMAP PDCD6IP ANKRD28
0.129255	6	460	4.30926	MYC target gene	http://www.tfacts.org	RARB ARL6IP5 TMF1 GNL3 LAMB2 RPL15
0.129255	6	463	4.28134	Cell junction assembly	http://amigo.geneontology.org/amigo/term/GO:0034329	CLASP2 BSN SETD5 PDCD6IP AMIGO3 ROBO2
0.129255	6	464	4.27211	Hsa-miR-589-3p POSITIVE DOWN target gene	http://diana.imis.athena-innovation.gr/DianaTools	RARB MRPL37 TXNDC12 CTDSPL SETD5 RPL15
0.129255	6	462	4.29061	GGGYGTGNY UNKNOWN	https://amp.pharm.mssm.edu/Enrichr	RARB GNAI2 VGLL4 BTD FAF1 MITF
0.132192	6	469	4.22657	HOXB2 target gene	http://regulatorycircuits.org	SCP2 TXNDC12 BTF3L4 ZFYVE9 BTD ANKRD28
0.139429	6	483	4.10406	Hsa-miR-1180 predicted target gene	http://www.mirz.unibas.ch/ElMMo3	DOCK3 ACKR2 LRIG1 GLYCTK AMIGO3 AGBL4
0.142059	6	498	3.98044	Hsa-miR-133a-5p target gene	http://mirdb.org	RAD18 ACTR8 ATXN7 ENTPD3 ATG7 ANKRD28
0.14769	6	505	3.92527	YTATTTTNR V$MEF2 02	https://amp.pharm.mssm.edu/Enrichr	CACNA2D3 PRKAA2 SLMAP LAMB2 MITF ANKRD28
0.148361	6	506	3.91751	Hsa-miR-9986 target gene	http://mirdb.org	LARS2 C3orf18 LIMD1 PRKAA2 SUCLG2 ANKRD28
0.155028	6	512	3.8716	Mitochondrial matrix	http://amigo.geneontology.org/amigo/term/GO:0005759	LARS2 ALAS1 MRPL37 DHX30 BTD SUCLG2
0.155564	6	513	3.86406	Hsa-miR-124-5p target gene	http://mirdb.org	RARB GNAI2 ATXN7 PDCD6IP TRAK1 ANKRD28
0.162834	6	520	3.81204	Hsa-miR-450b-5p target gene	https://genie.weizmann.ac.il/pubs/mir07	IRAK2 VGLL4 SLMAP BSN FAF1 ANKRD28
0.169178	6	525	3.77573	Hsa-miR-450b-5p POSITIVE DOWN target gene	http://diana.imis.athena-innovation.gr/DianaTools	GNAI2 CACNA2D3 PRKAA2 SLMAP SNRK ZNF717
0.173355	6	532	3.72605	Hsa-miR-3674 target gene	http://mirdb.org	TMF1 PRICKLE2 ENTPD3 AGBL4 MITF ANKRD28
0.176332	6	535	3.70516	HP:0002059 Cerebral atrophy	https://hpo.jax.org/app/	DHX30 TSEN2 SETD5 GLYCTK BTD TRAK1
0.182828	6	541	3.66407	HP:0007369 Atrophy/Degeneration affecting the cerebrum	https://hpo.jax.org/app/	DHX30 TSEN2 SETD5 GLYCTK BTD TRAK1
0.186651	6	545	3.63718	MiR-132 target gene	http://www.targetscan.org	PRKAA2 ATXN7 PRICKLE2 BSN SETD5 MITF
0.187072	6	547	3.62388	MiR-1842 target gene	http://www.targetscan.org	RAD18 DHCR24 LIMD1 ATXN7 RAD54L2 ATG7
0.190293	6	551	3.59757	TCF7L2 ENCODE	https://amp.pharm.mssm.edu/Enrichr	RBM6 NDC1 SEC22C CLASP2 RPL15 NKIRAS1
0.19141	6	553	3.58456	Hsa-miR-600 target gene	http://mirdb.org	EMC3 TMF1 CLASP2 ATXN7 PDCD6IP ROBO2
0.194858	6	557	3.55882	Hsa-miR-135b target gene	http://www.regnetworkweb.org/download/human.zip	RARB VGLL4 FGD5 SNRK BSN SUCLG2
0.19562	6	559	3.54608	Hsa-miR-6833-5p target gene	http://mirdb.org	LRIG1 PRKAA2 SLMAP BTD ROBO2 NKIRAS1
0.198258	6	561	3.53344	MODULE 23	http://www.gsea-msigdb.org/gsea/msigdb/cards/MODULE_23	ALAS1 ACAA1 SCP2 BSN ACOX2 LAMB2
0.00132954	5	56	29.4979	HSD17B4	http://www.pathwaycommons.org/archives/PC2/v12/PathwayCommons12.reconx.hgnc.txt.gz	ACAA1 DHCR24 SCP2 GLYCTK ACOX2
0.0163402	5	107	15.4382	CHEBI:57287	http://www.pathwaycommons.org/archives/PC2/v12/PathwayCommons12.reconx.hgnc.txt.gz	ACAA1 SCP2 ENTPD3 GLYCTK SUCLG2
0.026386	5	137	12.0575	ENTPD8	http://www.pathwaycommons.org/archives/PC2/v12/PathwayCommons12.reconx.hgnc.txt.gz	ALAS1 ACAA1 SCP2 ENTPD3 SUCLG2
0.029732	5	143	11.5516	ENTPD1	http://www.pathwaycommons.org/archives/PC2/v12/PathwayCommons12.reconx.hgnc.txt.gz	ALAS1 ACAA1 SCP2 ENTPD3 SUCLG2
0.0332086	5	148	11.1614	LANDIS ERBB2 BREAST TUMORS 324 DN	http://www.gsea-msigdb.org/gsea/msigdb/cards/LANDIS_ERBB2_BREAST_TUMORS_324_DN	ALAS1 ACAA1 SCP2 SNRK NKIRAS1
0.0387733	5	156	10.589	ACSL5	http://www.pathwaycommons.org/archives/PC2/v12/PathwayCommons12.reconx.hgnc.txt.gz	ACAA1 SCP2 ENTPD3 ACOX2 SUCLG2
0.0407317	5	159	10.3892	Hsa-miR-548at-5p POSITIVE DOWN target gene	http://diana.imis.athena-innovation.gr/DianaTools	ACTR8 FRMD4B EMC3 ROBO2 NKIRAS1
0.0449988	5	171	9.66014	V$CEBPDELTA Q6	https://amp.pharm.mssm.edu/Enrichr	RARB DOCK3 ZFYVE9 CACNA2D3 MITF
0.0492103	5	178	9.28025	V$HNF6 Q6	https://amp.pharm.mssm.edu/Enrichr	RARB CACNA2D3 PRICKLE2 MITF ANKRD28
0.0508242	5	181	9.12643	AFF1 SHRNA HELA HUMAN GSE69021 RNASEQ DOWN	https://amp.pharm.mssm.edu/Enrichr	NDC1 DHCR24 MRPL37 BTF3L4 PRKAA2
0.0581626	5	200	8.25942	GSE17721 LPS VS GARDIQUIMOD 24H BMDC DN	http://www.gsea-msigdb.org/gsea/msigdb/cards/GSE17721_LPS_VS_GARDIQUIMOD_24H_BMDC_DN	NDC1 RRP9 LIMD1 SSBP3 ATG7
0.0581626	5	200	8.25942	GSE3982 DC VS BCELL UP	http://www.gsea-msigdb.org/gsea/msigdb/cards/GSE3982_DC_VS_BCELL_UP	ALAS1 DHCR24 CACNA2D3 ACOX2 MITF
0.0581626	5	200	8.25942	GSE46143 CTRL VS LMP2A TRANSDUCED CD10 POS GC BCELL UP	http://www.gsea-msigdb.org/gsea/msigdb/cards/GSE46143_CTRL_VS_LMP2A_TRANSDUCED_CD10_POS_GC_BCELL_UP	KIF9 RRP9 MRPL37 CACNA2D3 GNL3
0.0615128	5	208	7.94175	Hsa-miR-505 target gene	https://genie.weizmann.ac.il/pubs/mir07	LIMD1 CACNA2D3 SNRK BSN SETD5
0.0656116	5	212	7.79191	Hsa-miR-936 target gene	http://www.regnetworkweb.org/download/human.zip	DOCK3 SEC22C DHX30 CLASP2 SLMAP
0.0666644	5	213	7.75532	CAIRO HEPATOBLASTOMA CLASSES DN	http://www.gsea-msigdb.org/gsea/msigdb/cards/CAIRO_HEPATOBLASTOMA_CLASSES_DN	ALAS1 RARB ARL6IP5 SNRK TRAK1
0.0687757	5	216	7.64761	Hsa-miR-4698 target gene	http://mirtarbase.mbc.nctu.edu.tw	SEC22C MRPL37 BTF3L4 CTDSPL SETD5
0.074826	5	226	7.30922	Hsa-miR-498 target gene	https://genie.weizmann.ac.il/pubs/mir07	LIMD1 CACNA2D3 SLMAP SNRK ANKRD28
0.0752651	5	227	7.27702	Hsa-miR-676-3p POSITIVE DOWN target gene	http://diana.imis.athena-innovation.gr/DianaTools	DHX30 TMF1 SLMAP RAD54L2 SETD5
0.0783567	5	232	7.12019	Hsa-miR-1827 target gene	https://genie.weizmann.ac.il/pubs/mir07	RARB SCP2 VGLL4 SETD5 FAF1
0.0814791	5	242	6.82597	Hsa-miR-634 target gene	https://genie.weizmann.ac.il/pubs/mir07	VGLL4 LRIG1 CLASP2 SETD5 PDCD6IP
0.0814791	5	240	6.88285	Hsa-miR-550a-5p POSITIVE DOWN target gene	http://diana.imis.athena-innovation.gr/DianaTools	RBM6 DHCR24 LRIG1 ZFYVE9 RAD54L2
0.0814791	5	236	6.99951	Hsa-miR-4313 target gene	http://mirdb.org	RAD18 GNAI2 DHCR24 VGLL4 BSN
0.0814791	5	238	6.94069	Hsa-miR-145-5p target gene	http://mirtarbase.mbc.nctu.edu.tw	VGLL4 ARL6IP5 ZFYVE9 ROBO2 ANKRD28
0.0814791	5	238	6.94069	HNF6 Q6	http://www.gsea-msigdb.org/gsea/msigdb/cards/HNF6_Q6	RARB CACNA2D3 PRICKLE2 MITF ANKRD28
0.0817693	5	244	6.77002	Hsa-miR-767-5p target gene	https://genie.weizmann.ac.il/pubs/mir07	LIMD1 CACNA2D3 CLASP2 SNRK MITF
0.0820154	5	250	6.60754	Hsa-miR-5581-5p POSITIVE DOWN target gene	http://diana.imis.athena-innovation.gr/DianaTools	DHCR24 CAND2 PRICKLE2 RAD54L2 PDCD6IP
0.0820154	5	247	6.68779	Hsa-miR-6808-3p target gene	http://mirdb.org	DOCK3 CTDSPL CLASP2 SETD5 TRAK1
0.0820154	5	248	6.66082	CEBPDELTA Q6	http://www.gsea-msigdb.org/gsea/msigdb/cards/CEBPDELTA_Q6	RARB DOCK3 ZFYVE9 CACNA2D3 MITF
0.0852359	5	255	6.47798	Hsa-miR-301 target gene	http://www.regnetworkweb.org/download/human.zip	DOCK3 VGLL4 LRIG1 ZFYVE9 PRICKLE2
0.0852359	5	255	6.47798	RAY TUMORIGENESIS BY ERBB2 CDC25A DN	http://www.gsea-msigdb.org/gsea/msigdb/cards/RAY_TUMORIGENESIS_BY_ERBB2_CDC25A_DN	SCP2 IRAK2 ZFYVE9 PRICKLE2 SETD5
0.0875933	5	258	6.40265	Hsa-miR-298 target gene	http://www.regnetworkweb.org/download/human.zip	SEC22C DHX30 ZFYVE9 CACNA2D3 ANKRD28
0.0875933	5	258	6.40265	Hsa-miR-183-3p POSITIVE DOWN target gene	http://diana.imis.athena-innovation.gr/DianaTools	RAD18 C3orf18 SEC22C LIMD1 PRKAA2
0.0883392	5	259	6.37793	Hsa-miR-3158-3p POSITIVE DOWN target gene	http://diana.imis.athena-innovation.gr/DianaTools	MRPL37 TMF1 LRIG1 LIMD1 SETD5
0.0937779	5	269	6.14083	CREB1 DEPLETION HUMAN GSE12056 CREEDSID GENE 68 DOWN	https://amp.pharm.mssm.edu/Enrichr	HSPB11 MRPL37 TXNDC12 SUCLG2 RPL15
0.101848	5	275	6.00685	Cytoplasmic region	http://amigo.geneontology.org/amigo/term/GO:0099568	CLASP2 BSN TRAK1 AGBL4 ATG7
0.104585	5	278	5.94203	Hsa-miR-1259 target gene	https://genie.weizmann.ac.il/pubs/mir07	RARB SCP2 TMF1 LRIG1 SLMAP
0.107642	5	281	5.87859	AOB granular layer	https://amp.pharm.mssm.edu/Enrichr	ARL6IP5 CACNA2D3 ENTPD3 BTD LAMB2
0.107642	5	282	5.85774	Posterolateral visual area layer 2/3	https://amp.pharm.mssm.edu/Enrichr	VGLL4 CAND2 SLMAP GNL3 GLYCTK
0.107731	5	283	5.83705	Orbital area lateral part layer 6a	https://amp.pharm.mssm.edu/Enrichr	RBM6 ACTR8 SSBP3 FBLN2 BSN
0.107731	5	283	5.83705	Layer 6 of InsCx	https://amp.pharm.mssm.edu/Enrichr	RAD18 RARB DOCK3 MRPL37 SSBP3
0.108595	5	284	5.81649	Retrosplenial area lateral agranular part layer 6b	https://amp.pharm.mssm.edu/Enrichr	VGLL4 TSEN2 SSBP3 FBLN2 BSN
0.109197	5	285	5.79608	AOB internal plexiform layer	https://amp.pharm.mssm.edu/Enrichr	ALAS1 ARL6IP5 CACNA2D3 ENTPD3 BTD
0.110088	5	288	5.73571	Accessory olfactory bulb mitral layer	https://amp.pharm.mssm.edu/Enrichr	ALAS1 CACNA2D3 ENTPD3 BTD ANKRD28
0.110088	5	287	5.75569	Bed nuclei of the stria terminalis anterior division	https://amp.pharm.mssm.edu/Enrichr	VGLL4 TMF1 TSEN2 PRKAA2 BTD
0.110088	5	290	5.69615	Posterior intralaminar nucleus	https://amp.pharm.mssm.edu/Enrichr	CTDSPL SSBP3 PRKAA2 GLYCTK AMIGO3
0.110088	5	290	5.69615	Sublayer 6b of FCx	https://amp.pharm.mssm.edu/Enrichr	LRIG1 LIMD1 FGD5 BTD ATG7
0.110088	5	288	5.73571	Agranular insular area ventral part layer 5	https://amp.pharm.mssm.edu/Enrichr	RARB DOCK3 SSBP3 FBLN2 SETD5
0.110088	5	288	5.73571	Nucleus prepositus	https://amp.pharm.mssm.edu/Enrichr	KIF9 LIMD1 LAMB2 SUCLG2 AMIGO3
0.110088	5	288	5.73571	Primary somatosensory area mouth layer 6b	https://amp.pharm.mssm.edu/Enrichr	RARB DOCK3 SSBP3 SETD5 PDCD6IP
0.1109	5	291	5.67658	R5 part of the oral Sp5 subnucleus	https://amp.pharm.mssm.edu/Enrichr	LARS2 GNAI2 TXNDC12 ARL6IP5 LIMD1
0.1109	5	291	5.67658	Osteosarcoma cell	https://amp.pharm.mssm.edu/Enrichr	DOCK3 RRP9 CACNA2D3 GNL3 ROBO2
0.11323	5	293	5.63783	Primary somatosensory area upper limb layer 6b	https://amp.pharm.mssm.edu/Enrichr	LRIG1 LIMD1 FGD5 BTD ATG7
0.114407	5	294	5.61865	Primary somatosensory area upper limb layer 6a	https://amp.pharm.mssm.edu/Enrichr	LRIG1 LIMD1 FGD5 BTD ATG7
0.115237	5	295	5.59961	Layer 6 of FCx	https://amp.pharm.mssm.edu/Enrichr	LRIG1 LIMD1 FGD5 BTD ATG7
0.11695	5	297	5.5619	Hsa-miR-578 target gene	https://genie.weizmann.ac.il/pubs/mir07	GNAI2 SSBP3 SLMAP SETD5 MITF
0.117926	5	300	5.50628	Hsa-miR-499-3p target gene	https://genie.weizmann.ac.il/pubs/mir07	RARB DOCK3 FRMD4B PRICKLE2 SLMAP
0.117926	5	300	5.50628	NFKB1 INACTIVATION HUMAN GSE20667 CREEDSID GENE 2575 UP	https://amp.pharm.mssm.edu/Enrichr	GNAI2 DHCR24 TXNDC12 VGLL4 ARL6IP5
0.12042	5	303	5.45176	NR5A2 KD HUMAN GSE47803 CREEDSID GENE 1819 UP	https://amp.pharm.mssm.edu/Enrichr	TXNDC12 ACKR2 ACOX2 SUCLG2 TRAK1
0.12894	5	313	5.27758	Hsa-miR-768-3p target gene	https://genie.weizmann.ac.il/pubs/mir07	CLASP2 PRICKLE2 SNRK SETD5 ROBO2
0.12894	5	313	5.27758	Umbilical cord blood	https://amp.pharm.mssm.edu/Enrichr	HSPB11 MRPL37 ARL6IP5 SLMAP BTD
0.129255	5	318	5.1946	Hsa-miR-1276 POSITIVE DOWN target gene	http://diana.imis.athena-innovation.gr/DianaTools	NDC1 DHCR24 PRKAA2 SNRK SETD5
0.129255	5	314	5.26078	MYB KD HUMAN GSE49286 CREEDSID GENE 1839 UP	https://amp.pharm.mssm.edu/Enrichr	GNAI2 VGLL4 LAMB2 RPL15 NKIRAS1
0.129255	5	318	5.1946	Hsa-miR-193a-5p target gene	http://mirdb.org	RARB BTF3L4 PRKAA2 TRAK1 NKIRAS1
0.129376	5	319	5.17832	Hsa-miR-548ah-5p target gene	http://mirtarbase.mbc.nctu.edu.tw	IRAK2 BTF3L4 ZFYVE9 PRICKLE2 NKIRAS1
0.129824	5	320	5.16214	Hsa-miR-3609 target gene	http://mirtarbase.mbc.nctu.edu.tw	IRAK2 BTF3L4 ZFYVE9 PRICKLE2 NKIRAS1
0.135854	5	329	5.02092	Hsa-miR-938 target gene	http://mirdb.org	SEC22C TSEN2 ATXN7 SNRK BTD
0.138507	5	333	4.96061	TORC1 complex	https://amp.pharm.mssm.edu/Enrichr	LARS2 VGLL4 PRKAA2 MITF ATG7
0.141161	5	335	4.931	Hsa-miR-4690-5p POSITIVE DOWN target gene	http://diana.imis.athena-innovation.gr/DianaTools	GNAI2 DHX30 CLASP2 RAD54L2 TRAK1
0.142059	5	342	4.83007	Hsa-miR-150 target gene	http://www.regnetworkweb.org/download/human.zip	C3orf18 KIF9 IRAK2 PRICKLE2 BSN
0.142059	5	341	4.84423	Hsa-miR-216b target gene	http://www.regnetworkweb.org/download/human.zip	DOCK3 TMF1 LRIG1 PDCD6IP AGBL4
0.142059	5	339	4.87281	Doxycycline DB00254 human GSE11422 sample 2573	https://amp.pharm.mssm.edu/Enrichr	LARS2 RARB C3orf18 GNAI2 ACOX2
0.142059	5	341	4.84423	TCF4 KD HUMAN GSE18560 CREEDSID GENE 1275 UP	https://amp.pharm.mssm.edu/Enrichr	ALAS1 ACAA1 SCP2 ARL6IP5 PDCD6IP
0.142059	5	338	4.88723	RUTELLA RESPONSE TO CSF2RB AND IL4 UP	http://www.gsea-msigdb.org/gsea/msigdb/cards/RUTELLA_RESPONSE_TO_CSF2RB_AND_IL4_UP	ALAS1 C3orf18 DHCR24 ARL6IP5 PDCD6IP
0.148361	5	352	4.69285	Steroid metabolic process	http://amigo.geneontology.org/amigo/term/GO:0008202	ACAA1 DHCR24 SCP2 PRKAA2 ACOX2
0.155028	5	357	4.62713	Hsa-miR-3122 target gene	http://mirdb.org	NDC1 DOCK3 SCP2 BTF3L4 RPL15
0.161472	5	362	4.56322	Hsa-miR-4735-3p target gene	http://mirdb.org	BTF3L4 CTDSPL CLASP2 ATXN7 ROBO2
0.162715	5	363	4.55064	Hsa-miR-1299 target gene	https://genie.weizmann.ac.il/pubs/mir07	DOCK3 GNAI2 CTDSPL TMF1 ANKRD28
0.172666	5	372	4.44055	RXRA target gene	http://www.regnetworkweb.org/download/human.zip	ACAA1 RARB SCP2 ACOX2 LAMB2
0.172666	5	372	4.44055	Hsa-miR-874-3p target gene	http://mirdb.org	DOCK3 C3orf18 SEC22C ACTR8 TMF1
0.175238	5	374	4.4168	MiR-342-3p target gene	http://www.targetscan.org	C3orf18 LIMD1 PRKAA2 BSN FAF1
0.178305	5	377	4.38166	Hsa-miR-194-5p POSITIVE DOWN target gene	http://diana.imis.athena-innovation.gr/DianaTools	DHCR24 SCP2 ARL6IP5 SETD5 LAMB2
0.179842	5	378	4.37006	MiR-10-5p target gene	http://www.targetscan.org	CTDSPL PRKAA2 CLASP2 ATXN7 BSN
0.183619	5	381	4.33565	Central amygdalar nucleus lateral part	https://amp.pharm.mssm.edu/Enrichr	RBM6 RARB LIMD1 LAMB2 AMIGO3
0.187072	5	385	4.29061	STEIN ESRRA TARGETS UP	http://www.gsea-msigdb.org/gsea/msigdb/cards/STEIN_ESRRA_TARGETS_UP	ALAS1 ACAA1 EMC3 MITF ANKRD28
0.188675	5	387	4.26843	HYPOCHLOROUS ACID 24341 human GSE11630 sample 3198	https://amp.pharm.mssm.edu/Enrichr	DHCR24 SCP2 ARL6IP5 ENTPD3 RPL15
0.190293	5	388	4.25743	Hsa-miR-1912-5p target gene	http://mirdb.org	RAD18 BTF3L4 BSN SETD5 ROBO2
0.192263	5	391	4.22477	MiR-342 target gene	http://www.targetscan.org	C3orf18 LIMD1 PRKAA2 BSN FAF1
0.193712	5	392	4.21399	Hsa-miR-448 target gene	https://genie.weizmann.ac.il/pubs/mir07	PRKAA2 SETD5 ROBO2 MITF ANKRD28
0.193712	5	392	4.21399	Non-membrane-bounded organelle assembly	http://amigo.geneontology.org/amigo/term/GO:0140694	KIF9 DHX30 LIMD1 PRKAA2 CLASP2
0.19625	5	395	4.18198	Hsa-miR-92a-1-5p POSITIVE DOWN target gene	http://diana.imis.athena-innovation.gr/DianaTools	VGLL4 ARL6IP5 BSN SETD5 LAMB2
0.0185306	4	58	22.7846	SCD5	http://www.pathwaycommons.org/archives/PC2/v12/PathwayCommons12.reconx.hgnc.txt.gz	ALAS1 SCP2 ENTPD3 SUCLG2
0.0185306	4	58	22.7846	SPR	http://www.pathwaycommons.org/archives/PC2/v12/PathwayCommons12.reconx.hgnc.txt.gz	ACAA1 SCP2 ENTPD3 SUCLG2
0.0229063	4	64	20.6486	GCAT	http://www.pathwaycommons.org/archives/PC2/v12/PathwayCommons12.reconx.hgnc.txt.gz	ALAS1 SCP2 ENTPD3 SUCLG2
0.0229063	4	64	20.6486	SCD	http://www.pathwaycommons.org/archives/PC2/v12/PathwayCommons12.reconx.hgnc.txt.gz	ALAS1 SCP2 ENTPD3 SUCLG2
0.0243436	4	66	20.0228	ACOT7	http://www.pathwaycommons.org/archives/PC2/v12/PathwayCommons12.reconx.hgnc.txt.gz	ACAA1 SCP2 ENTPD3 SUCLG2
0.0243436	4	66	20.0228	GLYAT	http://www.pathwaycommons.org/archives/PC2/v12/PathwayCommons12.reconx.hgnc.txt.gz	ALAS1 SCP2 ENTPD3 SUCLG2
0.0243436	4	66	20.0228	SUCLG1	http://www.pathwaycommons.org/archives/PC2/v12/PathwayCommons12.reconx.hgnc.txt.gz	ALAS1 SCP2 ENTPD3 SUCLG2
0.0248557	4	67	19.724	SUCLA2	http://www.pathwaycommons.org/archives/PC2/v12/PathwayCommons12.reconx.hgnc.txt.gz	ALAS1 SCP2 ENTPD3 SUCLG2
0.026386	4	70	18.8787	ACAT1	http://www.pathwaycommons.org/archives/PC2/v12/PathwayCommons12.reconx.hgnc.txt.gz	ACAA1 SCP2 ENTPD3 SUCLG2
0.0332086	4	78	16.9424	ACOT2	http://www.pathwaycommons.org/archives/PC2/v12/PathwayCommons12.reconx.hgnc.txt.gz	ACAA1 SCP2 ENTPD3 SUCLG2
0.0344222	4	79	16.7279	RXRG target gene	http://www.regnetworkweb.org/download/human.zip	ACAA1 RARB SCP2 ACOX2
0.0407317	4	86	15.3664	Hsa-miR-589-3p target gene	http://mirtarbase.mbc.nctu.edu.tw	DHX30 LRIG1 SETD5 RPL15
0.0429212	4	89	14.8484	CRAT	http://www.pathwaycommons.org/archives/PC2/v12/PathwayCommons12.reconx.hgnc.txt.gz	ACAA1 SCP2 ENTPD3 SUCLG2
0.0429212	4	89	14.8484	SLC25A16	http://www.pathwaycommons.org/archives/PC2/v12/PathwayCommons12.reconx.hgnc.txt.gz	SCP2 ENTPD3 GLYCTK SUCLG2
0.0471004	4	94	14.0586	Chr3p24	http://www.gsea-msigdb.org/gsea/msigdb/cards/chr3p24	RARB NEK10 RPL15 NKIRAS1
0.0516086	4	99	13.3486	MODULE 43	http://www.gsea-msigdb.org/gsea/msigdb/cards/MODULE_43	ACAA1 DHCR24 TXNDC12 ACOX2
0.0570912	4	105	12.5858	HADHB	http://www.pathwaycommons.org/archives/PC2/v12/PathwayCommons12.reconx.hgnc.txt.gz	ACAA1 SCP2 ENTPD3 SUCLG2
0.0581626	4	109	12.1239	BAAT	http://www.pathwaycommons.org/archives/PC2/v12/PathwayCommons12.reconx.hgnc.txt.gz	ACAA1 SCP2 GLYCTK ACOX2
0.0581626	4	110	12.0137	Hsa-miR-518d-5p target gene	https://genie.weizmann.ac.il/pubs/mir07	VGLL4 SLMAP ROBO2 ANKRD28
0.0581626	4	110	12.0137	Hsa-miR-519b-5p target gene	https://genie.weizmann.ac.il/pubs/mir07	VGLL4 SLMAP ROBO2 ANKRD28
0.0581626	4	110	12.0137	Hsa-miR-519c-5p target gene	https://genie.weizmann.ac.il/pubs/mir07	VGLL4 SLMAP ROBO2 ANKRD28
0.0581626	4	110	12.0137	Hsa-miR-520c-5p target gene	https://genie.weizmann.ac.il/pubs/mir07	VGLL4 SLMAP ROBO2 ANKRD28
0.0581626	4	110	12.0137	Hsa-miR-526a target gene	https://genie.weizmann.ac.il/pubs/mir07	VGLL4 SLMAP ROBO2 ANKRD28
0.0581626	4	108	12.2362	Hsa-miR-4753-5p target gene	http://mirtarbase.mbc.nctu.edu.tw	LRIG1 LIMD1 ZFYVE9 ATG7
0.0618532	4	116	11.3923	ACAA2	http://www.pathwaycommons.org/archives/PC2/v12/PathwayCommons12.reconx.hgnc.txt.gz	ACAA1 SCP2 ENTPD3 SUCLG2
0.0810043	4	134	9.86199	Hsa-miR-1231 target gene	https://genie.weizmann.ac.il/pubs/mir07	DOCK3 GNAI2 CTDSPL TMF1
0.0814791	4	138	9.57614	ENPP1	http://www.pathwaycommons.org/archives/PC2/v12/PathwayCommons12.reconx.hgnc.txt.gz	SCP2 ENTPD3 GLYCTK SUCLG2
0.0820154	4	143	9.24131	ENTPD3	http://www.pathwaycommons.org/archives/PC2/v12/PathwayCommons12.reconx.hgnc.txt.gz	ALAS1 ACAA1 SCP2 SUCLG2
0.0820154	4	143	9.24131	WAKABAYASHI ADIPOGENESIS PPARG RXRA BOUND 36HR	http://www.gsea-msigdb.org/gsea/msigdb/cards/WAKABAYASHI_ADIPOGENESIS_PPARG_RXRA_BOUND_36HR	ACAA1 GNAI2 TXNDC12 BTF3L4
0.084174	4	146	9.05142	Sp1 22099172 dental follicle cell gof human gpl11532 gse31628 down	https://amp.pharm.mssm.edu/Enrichr	SCP2 BTF3L4 LRIG1 GLYCTK
0.0876696	4	150	8.81005	Hsa-miR-651 target gene	https://genie.weizmann.ac.il/pubs/mir07	DHCR24 SCP2 CLASP2 SLMAP
0.0903125	4	154	8.58122	Hsa-miR-224-3p POSITIVE DOWN target gene	http://diana.imis.athena-innovation.gr/DianaTools	TXNDC12 TMF1 GNL3 SETD5
0.0912319	4	155	8.52585	RXRB target gene	http://www.regnetworkweb.org/download/human.zip	ACAA1 RARB SCP2 ACOX2
0.107642	4	167	7.91322	Hsa-miR-504-5p POSITIVE DOWN target gene	http://diana.imis.athena-innovation.gr/DianaTools	DHX30 TSEN2 PRICKLE2 SETD5
0.115237	4	176	7.50856	MSX1 01	http://www.gsea-msigdb.org/gsea/msigdb/cards/MSX1_01	RARB KIF9 ARL6IP5 MITF
0.119105	4	181	7.30115	Hsa-miR-508-5p target gene	https://genie.weizmann.ac.il/pubs/mir07	LIMD1 SLMAP BSN ANKRD28
0.121005	4	182	7.26103	FASN	http://www.pathwaycommons.org/archives/PC2/v12/PathwayCommons12.reconx.hgnc.txt.gz	ACAA1 SCP2 GLYCTK SUCLG2
0.121919	4	183	7.22135	Fatty acid metabolism	https://reactome.org/download/current	ACAA1 SCP2 PRKAA2 ACOX2
0.121919	4	183	7.22135	V$HLF 01	https://amp.pharm.mssm.edu/Enrichr	ZFYVE9 CACNA2D3 PRKAA2 BSN
0.122843	4	184	7.1821	V$PBX1 01	https://amp.pharm.mssm.edu/Enrichr	RARB CACNA2D3 PRICKLE2 MITF
0.125462	4	186	7.10488	Synapse assembly	http://amigo.geneontology.org/amigo/term/GO:0007416	BSN SETD5 AMIGO3 ROBO2
0.129255	4	190	6.9553	V$TST1 01	https://amp.pharm.mssm.edu/Enrichr	RAD18 SSBP3 CACNA2D3 ANKRD28
0.129255	4	190	6.9553	V$CEBPB 01	https://amp.pharm.mssm.edu/Enrichr	RARB DOCK3 ZFYVE9 MITF
0.129255	4	191	6.91889	V$PITX2 Q2	https://amp.pharm.mssm.edu/Enrichr	CACNA2D3 PRICKLE2 FAF1 MITF
0.129255	4	192	6.88285	P53 DN.V1 UP	http://www.gsea-msigdb.org/gsea/msigdb/cards/P53_DN.V1_UP	CAND2 LRIG1 FBLN2 LAMB2
0.129255	4	193	6.84719	GSE25087 TREG VS TCONV ADULT DN	http://www.gsea-msigdb.org/gsea/msigdb/cards/GSE25087_TREG_VS_TCONV_ADULT_DN	KIF9 VGLL4 CAND2 TSEN2
0.129255	4	191	6.91889	GSE2770 TGFB AND IL4 VS IL4 TREATED ACT CD4 TCELL 6H UP	http://www.gsea-msigdb.org/gsea/msigdb/cards/GSE2770_TGFB_AND_IL4_VS_IL4_TREATED_ACT_CD4_TCELL_6H_UP	DHX30 SSBP3 TRAK1 ATG7
0.129255	4	190	6.9553	GSE5099 CLASSICAL M1 VS ALTERNATIVE M2 MACROPHAGE UP	http://www.gsea-msigdb.org/gsea/msigdb/cards/GSE5099_CLASSICAL_M1_VS_ALTERNATIVE_M2_MACROPHAGE_UP	ACAA1 LRIG1 GNL3 NKIRAS1
0.129255	4	193	6.84719	GSE9509 LPS VS LPS AND IL10 STIM IL10 KO MACROPHAGE 20MIN UP	http://www.gsea-msigdb.org/gsea/msigdb/cards/GSE9509_LPS_VS_LPS_AND_IL10_STIM_IL10_KO_MACROPHAGE_20MIN_UP	CTDSPL FGD5 SNRK ACOX2
0.129255	4	192	6.88285	GSE12001 MIR223 KO VS WT NEUTROPHIL UP	http://www.gsea-msigdb.org/gsea/msigdb/cards/GSE12001_MIR223_KO_VS_WT_NEUTROPHIL_UP	C3orf18 FRMD4B MRPL37 SUCLG2
0.129255	4	193	6.84719	GSE16385 IL4 VS ROSIGLITAZONE STIM MACROPHAGE UP	http://www.gsea-msigdb.org/gsea/msigdb/cards/GSE16385_IL4_VS_ROSIGLITAZONE_STIM_MACROPHAGE_UP	FRMD4B SCP2 VGLL4 TSEN2
0.129255	4	193	6.84719	GSE37301 LYMPHOID PRIMED MPP VS GRAN MONO PROGENITOR DN	http://www.gsea-msigdb.org/gsea/msigdb/cards/GSE37301_LYMPHOID_PRIMED_MPP_VS_GRAN_MONO_PROGENITOR_DN	HSPB11 GNAI2 DHCR24 SNRK
0.129255	4	193	6.84719	GSE18804 BRAIN VS COLON TUMORAL MACROPHAGE UP	http://www.gsea-msigdb.org/gsea/msigdb/cards/GSE18804_BRAIN_VS_COLON_TUMORAL_MACROPHAGE_UP	KIF9 BSN TRAK1 ZNF717
0.129824	4	194	6.81189	GSE26290 WT VS PDK1 KO ANTI CD3 AND IL2 STIM CD8 TCELL UP	http://www.gsea-msigdb.org/gsea/msigdb/cards/GSE26290_WT_VS_PDK1_KO_ANTI_CD3_AND_IL2_STIM_CD8_TCELL_UP	IRAK2 SNRK GLYCTK TRAK1
0.129824	4	194	6.81189	GSE37301 PRO BCELL VS GRANULOCYTE MONOCYTE PROGENITOR DN	http://www.gsea-msigdb.org/gsea/msigdb/cards/GSE37301_PRO_BCELL_VS_GRANULOCYTE_MONOCYTE_PROGENITOR_DN	DHCR24 SCP2 IRAK2 FAF1
0.129824	4	194	6.81189	GSE20727 CTRL VS ROS INH AND DNFB ALLERGEN TREATED DC UP	http://www.gsea-msigdb.org/gsea/msigdb/cards/GSE20727_CTRL_VS_ROS_INH_AND_DNFB_ALLERGEN_TREATED_DC_UP	NDC1 SCP2 BTD ATG7
0.129824	4	194	6.81189	GSE46606 IRF4 KO VS WT CD40L IL2 IL5 1DAY STIMULATED BCELL UP	http://www.gsea-msigdb.org/gsea/msigdb/cards/GSE46606_IRF4_KO_VS_WT_CD40L_IL2_IL5_1DAY_STIMULATED_BCELL_UP	RAD18 C3orf18 DHCR24 CLASP2
0.13109	4	195	6.77696	Hsa-miR-500 target gene	http://www.regnetworkweb.org/download/human.zip	HSPB11 SCP2 SETD5 AGBL4
0.13109	4	195	6.77696	GSE17301 CTRL VS 48H ACD3 ACD28 STIM CD8 TCELL UP	http://www.gsea-msigdb.org/gsea/msigdb/cards/GSE17301_CTRL_VS_48H_ACD3_ACD28_STIM_CD8_TCELL_UP	PRKAA2 FBLN2 SNRK TRAK1
0.13109	4	195	6.77696	GSE45365 CD8A DC VS CD11B DC DN	http://www.gsea-msigdb.org/gsea/msigdb/cards/GSE45365_CD8A_DC_VS_CD11B_DC_DN	TSEN2 SUCLG2 ROBO2 ZNF717
0.132594	4	196	6.74238	V$EFC Q6	https://amp.pharm.mssm.edu/Enrichr	DHX30 CACNA2D3 FAF1 MITF
0.132742	4	197	6.70816	GSE17721 CPG VS GARDIQUIMOD 24H BMDC UP	http://www.gsea-msigdb.org/gsea/msigdb/cards/GSE17721_CPG_VS_GARDIQUIMOD_24H_BMDC_UP	RARB ACKR2 BSN SUCLG2
0.132742	4	197	6.70816	GSE2770 UNTREATED VS TGFB AND IL4 TREATED ACT CD4 TCELL 48H DN	http://www.gsea-msigdb.org/gsea/msigdb/cards/GSE2770_UNTREATED_VS_TGFB_AND_IL4_TREATED_ACT_CD4_TCELL_48H_DN	FRMD4B ARL6IP5 TMF1 LRIG1
0.132742	4	197	6.70816	GSE6674 UNSTIM VS ANTI IGM AND CPG STIM BCELL DN	http://www.gsea-msigdb.org/gsea/msigdb/cards/GSE6674_UNSTIM_VS_ANTI_IGM_AND_CPG_STIM_BCELL_DN	C3orf18 RRP9 DHX30 GNL3
0.132742	4	197	6.70816	GSE17186 MEMORY VS CD21HIGH TRANSITIONAL BCELL UP	http://www.gsea-msigdb.org/gsea/msigdb/cards/GSE17186_MEMORY_VS_CD21HIGH_TRANSITIONAL_BCELL_UP	DOCK3 EMC3 IRAK2 FBLN2
0.132742	4	197	6.70816	GSE21927 SPLEEN VS 4T1 TUMOR MONOCYTE BALBC DN	http://www.gsea-msigdb.org/gsea/msigdb/cards/GSE21927_SPLEEN_VS_4T1_TUMOR_MONOCYTE_BALBC_DN	NDC1 FRMD4B SUCLG2 MITF
0.132742	4	197	6.70816	GSE37532 TREG VS TCONV PPARG KO CD4 TCELL FROM VISCERAL ADIPOSE TISSUE UP	http://www.gsea-msigdb.org/gsea/msigdb/cards/GSE37532_TREG_VS_TCONV_PPARG_KO_CD4_TCELL_FROM_VISCERAL_ADIPOSE_TISSUE_UP	FRMD4B DHCR24 GLYCTK PDCD6IP
0.132742	4	197	6.70816	GSE42021 TREG VS TCONV PLN DN	http://www.gsea-msigdb.org/gsea/msigdb/cards/GSE42021_TREG_VS_TCONV_PLN_DN	CTDSPL TMF1 MITF ANKRD28
0.133873	4	198	6.67428	GSE3982 NEUTROPHIL VS EFF MEMORY CD4 TCELL DN	http://www.gsea-msigdb.org/gsea/msigdb/cards/GSE3982_NEUTROPHIL_VS_EFF_MEMORY_CD4_TCELL_DN	SCP2 VGLL4 ACKR2 SSBP3
0.133873	4	198	6.67428	GSE37533 PPARG1 FOXP3 VS FOXP3 TRANSDUCED CD4 TCELL PIOGLITAZONE TREATED DN	http://www.gsea-msigdb.org/gsea/msigdb/cards/GSE37533_PPARG1_FOXP3_VS_FOXP3_TRANSDUCED_CD4_TCELL_PIOGLITAZONE_TREATED_DN	NDC1 CAND2 SSBP3 SNRK
0.134425	4	199	6.64074	GSE13738 RESTING VS TCR ACTIVATED CD4 TCELL DN	http://www.gsea-msigdb.org/gsea/msigdb/cards/GSE13738_RESTING_VS_TCR_ACTIVATED_CD4_TCELL_DN	DHCR24 SCP2 IRAK2 TRAK1
0.134425	4	199	6.64074	GSE17721 POLYIC VS PAM3CSK4 2H BMDC UP	http://www.gsea-msigdb.org/gsea/msigdb/cards/GSE17721_POLYIC_VS_PAM3CSK4_2H_BMDC_UP	VGLL4 CLASP2 SNRK ANKRD28
0.134425	4	199	6.64074	GSE17974 0H VS 72H IN VITRO ACT CD4 TCELL DN	http://www.gsea-msigdb.org/gsea/msigdb/cards/GSE17974_0H_VS_72H_IN_VITRO_ACT_CD4_TCELL_DN	RBM6 HSPB11 MRPL37 FAF1
0.134425	4	199	6.64074	GSE19825 NAIVE VS IL2RAHIGH DAY3 EFF CD8 TCELL DN	http://www.gsea-msigdb.org/gsea/msigdb/cards/GSE19825_NAIVE_VS_IL2RAHIGH_DAY3_EFF_CD8_TCELL_DN	ALAS1 CAND2 TSEN2 SUCLG2
0.134425	4	199	6.64074	GSE22886 DAY1 VS DAY7 MONOCYTE IN CULTURE DN	http://www.gsea-msigdb.org/gsea/msigdb/cards/GSE22886_DAY1_VS_DAY7_MONOCYTE_IN_CULTURE_DN	ACAA1 DHCR24 SCP2 SUCLG2
0.134425	4	199	6.64074	GSE411 WT VS SOCS3 KO MACROPHAGE UP	http://www.gsea-msigdb.org/gsea/msigdb/cards/GSE411_WT_VS_SOCS3_KO_MACROPHAGE_UP	RARB VGLL4 ACKR2 SSBP3
0.134425	4	199	6.64074	GSE32986 UNSTIM VS GMCSF AND CURDLAN LOWDOSE STIM DC UP	http://www.gsea-msigdb.org/gsea/msigdb/cards/GSE32986_UNSTIM_VS_GMCSF_AND_CURDLAN_LOWDOSE_STIM_DC_UP	ALAS1 NDC1 RAD18 FRMD4B
0.135061	4	200	6.60754	Microtubule-based transport	http://amigo.geneontology.org/amigo/term/GO:0099111	HSPB11 NEK10 TRAK1 AGBL4
0.135061	4	200	6.60754	GSE13306 RA VS UNTREATED MEM CD4 TCELL DN	http://www.gsea-msigdb.org/gsea/msigdb/cards/GSE13306_RA_VS_UNTREATED_MEM_CD4_TCELL_DN	FRMD4B ARL6IP5 TMF1 LAMB2
0.135061	4	200	6.60754	GSE2770 UNTREATED VS ACT CD4 TCELL 2H DN	http://www.gsea-msigdb.org/gsea/msigdb/cards/GSE2770_UNTREATED_VS_ACT_CD4_TCELL_2H_DN	ACTR8 TSEN2 SUCLG2 FAF1
0.135061	4	200	6.60754	GSE5589 UNSTIM VS 45MIN LPS AND IL6 STIM MACROPHAGE UP	http://www.gsea-msigdb.org/gsea/msigdb/cards/GSE5589_UNSTIM_VS_45MIN_LPS_AND_IL6_STIM_MACROPHAGE_UP	HSPB11 DOCK3 VGLL4 CLASP2
0.135061	4	200	6.60754	GSE5589 LPS VS LPS AND IL10 STIM IL10 KO MACROPHAGE 180MIN UP	http://www.gsea-msigdb.org/gsea/msigdb/cards/GSE5589_LPS_VS_LPS_AND_IL10_STIM_IL10_KO_MACROPHAGE_180MIN_UP	RBM6 KIF9 CLASP2 MITF
0.135061	4	200	6.60754	GSE22589 HEALTHY VS HIV INFECTED DC UP	http://www.gsea-msigdb.org/gsea/msigdb/cards/GSE22589_HEALTHY_VS_HIV_INFECTED_DC_UP	LARS2 RRP9 PDCD6IP ROBO2
0.135061	4	200	6.60754	GSE23321 CENTRAL VS EFFECTOR MEMORY CD8 TCELL DN	http://www.gsea-msigdb.org/gsea/msigdb/cards/GSE23321_CENTRAL_VS_EFFECTOR_MEMORY_CD8_TCELL_DN	HSPB11 DHCR24 RAD54L2 MITF
0.135061	4	200	6.60754	GSE41087 WT VS FOXP3 MUT ANTI CD3 CD28 STIM CD4 TCELL DN	http://www.gsea-msigdb.org/gsea/msigdb/cards/GSE41087_WT_VS_FOXP3_MUT_ANTI_CD3_CD28_STIM_CD4_TCELL_DN	ACAA1 DHCR24 CACNA2D3 SUCLG2
0.13725	4	202	6.54212	Steroid biosynthetic process	http://amigo.geneontology.org/amigo/term/GO:0006694	DHCR24 SCP2 PRKAA2 ACOX2
0.13725	4	202	6.54212	Oleic Acid	http://ctd.mdibl.org	ACAA1 SCP2 PRKAA2 ACOX2
0.142059	4	210	6.29289	SLC27A2	http://www.pathwaycommons.org/archives/PC2/v12/PathwayCommons12.reconx.hgnc.txt.gz	ACAA1 SCP2 GLYCTK ACOX2
0.142059	4	209	6.323	Hsa-miR-624-3p POSITIVE DOWN target gene	http://diana.imis.athena-innovation.gr/DianaTools	SEC22C SNRK SETD5 ZNF717
0.142059	4	208	6.3534	VANTVEER BREAST CANCER ESR1 UP	http://www.gsea-msigdb.org/gsea/msigdb/cards/VANTVEER_BREAST_CANCER_ESR1_UP	C3orf18 LRIG1 BTD LAMB2
0.142315	4	213	6.20426	Hsa-miR-1236 target gene	https://genie.weizmann.ac.il/pubs/mir07	SLMAP BSN PDCD6IP ANKRD28
0.142315	4	213	6.20426	Hsa-miR-1470 target gene	http://mirdb.org	C3orf18 SNRK BSN RAD54L2
0.143981	4	214	6.17527	SETBP1-SET-binding protein target gene	http://gtrd.biouml.org	ARL6IP5 TSEN2 GNL3 FAF1
0.155028	4	221	5.97967	Regulation of cell junction assembly	http://amigo.geneontology.org/amigo/term/GO:1901888	CLASP2 SETD5 AMIGO3 ROBO2
0.159116	4	223	5.92604	AAGCAAT MIR137	http://www.gsea-msigdb.org/gsea/msigdb/cards/AAGCAAT_MIR137	CTDSPL SNRK BSN MITF
0.169787	4	229	5.77077	MiR-17-5p/20-5p/20/93/106/427 target gene	http://www.targetscan.org	RARB ZFYVE9 ATG7 NKIRAS1
0.171746	4	230	5.74568	VDR Q3	http://www.gsea-msigdb.org/gsea/msigdb/cards/VDR_Q3	RARB TXNDC12 DHX30 SSBP3
0.17595	4	234	5.64747	Hsa-miR-6826-5p target gene	http://mirdb.org	VGLL4 CACNA2D3 GNL3 ANKRD28
0.176859	4	235	5.62344	Hsa-miR-624 target gene	https://genie.weizmann.ac.il/pubs/mir07	RARB BSN ROBO2 ANKRD28
0.176859	4	235	5.62344	EPZ004777 56962336 human GSE29828 sample 2649	https://amp.pharm.mssm.edu/Enrichr	ACAA1 ARL6IP5 CACNA2D3 RPL15
0.178852	4	236	5.59961	Hsa-miR-183 target gene	https://genie.weizmann.ac.il/pubs/mir07	CTDSPL LIMD1 PRICKLE2 ROBO2
0.184106	4	239	5.52932	Hsa-miR-4633-5p target gene	http://mirdb.org	PDCD6IP SUCLG2 TRAK1 ROBO2
0.187072	4	241	5.48343	Hsa-miR-891b target gene	https://genie.weizmann.ac.il/pubs/mir07	FRMD4B SCP2 BTF3L4 SNRK
0.187072	4	241	5.48343	Hsa-miR-501-5p target gene	http://www.regnetworkweb.org/download/human.zip	HSPB11 ZFYVE9 RAD54L2 SUCLG2
0.187502	4	242	5.46077	TCF4 Q5	http://www.gsea-msigdb.org/gsea/msigdb/cards/TCF4_Q5	NDC1 DOCK3 MITF ANKRD28
0.188675	4	243	5.4383	Hsa-miR-3200-3p POSITIVE DOWN target gene	http://diana.imis.athena-innovation.gr/DianaTools	DHCR24 SNRK LAMB2 NKIRAS1
0.190293	4	244	5.41601	Hsa-miR-599 target gene	http://www.regnetworkweb.org/download/human.zip	RARB TXNDC12 IRAK2 CLASP2
0.19141	4	245	5.39391	SOX9 target gene	http://www.regnetworkweb.org/download/human.zip	LIMD1 TSEN2 SSBP3 BSN
0.192263	4	246	5.37198	MiR-376ab-3p target gene	http://www.targetscan.org	NDC1 NEK10 CLASP2 RAD54L2
0.192263	4	246	5.37198	ZNF211 human tf ARCHS4 coexpression	https://amp.pharm.mssm.edu/Enrichr	RBM6 RARB C3orf49 SETD5
0.192263	4	246	5.37198	FOXO4 01	http://www.gsea-msigdb.org/gsea/msigdb/cards/FOXO4_01	TXNDC12 ZFYVE9 SSBP3 ANKRD28
0.195297	4	248	5.32866	HSIAO LIVER SPECIFIC GENES	http://www.gsea-msigdb.org/gsea/msigdb/cards/HSIAO_LIVER_SPECIFIC_GENES	ALAS1 ACAA1 DHCR24 ACOX2
0.195297	4	248	5.32866	MEF2 Q6 01	http://www.gsea-msigdb.org/gsea/msigdb/cards/MEF2_Q6_01	ARL6IP5 CACNA2D3 PRKAA2 MITF
0.198258	4	250	5.28603	Organic hydroxy compound biosynthetic process	http://amigo.geneontology.org/amigo/term/GO:1901617	DHCR24 SCP2 PRKAA2 ACOX2
0.00871651	3	13	76.2408	Succinyl coenzyme A (HMDB01022)	https://amp.pharm.mssm.edu/Enrichr	ALAS1 ACAA1 SUCLG2
0.0132068	3	15	66.0754	AMACR	http://www.pathwaycommons.org/archives/PC2/v12/PathwayCommons12.reconx.hgnc.txt.gz	ACAA1 SCP2 ACOX2
0.0143478	3	16	61.9457	Fatty acid beta-oxidation using acyl-CoA oxidase	http://amigo.geneontology.org/amigo/term/GO:0033540	ACAA1 SCP2 ACOX2
0.0163402	3	17	58.3018	DLST	http://www.pathwaycommons.org/archives/PC2/v12/PathwayCommons12.reconx.hgnc.txt.gz	ALAS1 ENTPD3 SUCLG2
0.0174588	3	18	55.0628	CHEBI:57292	http://www.pathwaycommons.org/archives/PC2/v12/PathwayCommons12.reconx.hgnc.txt.gz	ALAS1 ENTPD3 SUCLG2
0.0185306	3	20	49.5565	EHHADH	http://www.pathwaycommons.org/archives/PC2/v12/PathwayCommons12.reconx.hgnc.txt.gz	ACAA1 SCP2 ACOX2
0.0203817	3	21	47.1967	STITCH phytanic acid(CID000026840)	https://genesetdb.auckland.ac.nz	ACAA1 SCP2 ACOX2
0.0273356	3	26	38.1204	ACOT4	http://www.pathwaycommons.org/archives/PC2/v12/PathwayCommons12.reconx.hgnc.txt.gz	ACAA1 SCP2 ACOX2
0.0332086	3	29	34.1769	OXCT1	http://www.pathwaycommons.org/archives/PC2/v12/PathwayCommons12.reconx.hgnc.txt.gz	ALAS1 ENTPD3 SUCLG2
0.0332086	3	29	34.1769	OXCT2	http://www.pathwaycommons.org/archives/PC2/v12/PathwayCommons12.reconx.hgnc.txt.gz	ALAS1 ENTPD3 SUCLG2
0.0332086	3	29	34.1769	PDHX	http://www.pathwaycommons.org/archives/PC2/v12/PathwayCommons12.reconx.hgnc.txt.gz	ALAS1 ENTPD3 SUCLG2
0.0332086	3	29	34.1769	Peroxisomal lipid metabolism	https://reactome.org/download/current	ACAA1 SCP2 ACOX2
0.0407317	3	33	30.0343	MECR	http://www.pathwaycommons.org/archives/PC2/v12/PathwayCommons12.reconx.hgnc.txt.gz	ACAA1 ENTPD3 GLYCTK
0.0407317	3	33	30.0343	PECR	http://www.pathwaycommons.org/archives/PC2/v12/PathwayCommons12.reconx.hgnc.txt.gz	ACAA1 ENTPD3 GLYCTK
0.0440413	3	35	28.318	OGDH	http://www.pathwaycommons.org/archives/PC2/v12/PathwayCommons12.reconx.hgnc.txt.gz	ALAS1 ENTPD3 SUCLG2
0.0471004	3	37	26.7873	Chondrodysplasia punctata	https://amp.pharm.mssm.edu/Enrichr	ACAA1 DHCR24 SCP2
0.0516086	3	40	24.7783	ACOT8	http://www.pathwaycommons.org/archives/PC2/v12/PathwayCommons12.reconx.hgnc.txt.gz	ACAA1 SCP2 ACOX2
0.0581626	3	44	22.5257	Microbody lumen	https://amp.pharm.mssm.edu/Enrichr	ACAA1 SCP2 ACOX2
0.0581626	3	45	22.0251	MBD1 target gene	http://itfp.biosino.org/itfp	RBM6 SETD5 ANKRD28
0.0595945	3	46	21.5463	ACADS	http://www.pathwaycommons.org/archives/PC2/v12/PathwayCommons12.reconx.hgnc.txt.gz	ACAA1 SCP2 ENTPD3
0.0595945	3	46	21.5463	OSBPL9 target gene	http://itfp.biosino.org/itfp	RBM6 SETD5 ANKRD28
0.0608416	3	47	21.0879	EHMN Bile acid biosynthesis	https://genesetdb.auckland.ac.nz	ACAA1 SCP2 ACOX2
0.0614271	3	48	20.6486	Annuli extracellular matrix	https://amp.pharm.mssm.edu/Enrichr	SCP2 FBLN2 ATG7
0.0614271	3	48	20.6486	Collagen and cuticulin-based cuticle extracellular matrix	https://amp.pharm.mssm.edu/Enrichr	SCP2 FBLN2 ATG7
0.0614271	3	48	20.6486	Collagen and cuticulin-based cuticle extracellular matrix part	https://amp.pharm.mssm.edu/Enrichr	SCP2 FBLN2 ATG7
0.0614271	3	48	20.6486	Cortical layer of collagen and cuticulin-based cuticle extracellular matrix	https://amp.pharm.mssm.edu/Enrichr	SCP2 FBLN2 ATG7
0.0716694	3	52	19.0602	MCAT	http://www.pathwaycommons.org/archives/PC2/v12/PathwayCommons12.reconx.hgnc.txt.gz	SCP2 ENTPD3 SUCLG2
0.0733515	3	53	18.7006	Bile acid metabolic process	http://amigo.geneontology.org/amigo/term/GO:0008206	ACAA1 SCP2 ACOX2
0.0750492	3	55	18.0206	CS	http://www.pathwaycommons.org/archives/PC2/v12/PathwayCommons12.reconx.hgnc.txt.gz	SCP2 ENTPD3 SUCLG2
0.0763784	3	56	17.6988	Peroxisomal matrix	http://amigo.geneontology.org/amigo/term/GO:0005782	ACAA1 SCP2 ACOX2
0.0763784	3	56	17.6988	Microbody lumen	http://amigo.geneontology.org/amigo/term/GO:0031907	ACAA1 SCP2 ACOX2
0.0808937	3	58	17.0885	GNPAT	http://www.pathwaycommons.org/archives/PC2/v12/PathwayCommons12.reconx.hgnc.txt.gz	ACAA1 SCP2 GLYCTK
0.0814791	3	60	16.5188	ACAA1	http://www.pathwaycommons.org/archives/PC2/v12/PathwayCommons12.reconx.hgnc.txt.gz	SCP2 ENTPD3 ACOX2
0.0814791	3	60	16.5188	DLD	http://www.pathwaycommons.org/archives/PC2/v12/PathwayCommons12.reconx.hgnc.txt.gz	ALAS1 ENTPD3 SUCLG2
0.0814791	3	60	16.5188	NAGS	http://www.pathwaycommons.org/archives/PC2/v12/PathwayCommons12.reconx.hgnc.txt.gz	SCP2 ENTPD3 SUCLG2
0.0820154	3	64	15.4864	ACAT2	http://www.pathwaycommons.org/archives/PC2/v12/PathwayCommons12.reconx.hgnc.txt.gz	ACAA1 SCP2 GLYCTK
0.0820154	3	63	15.7322	HMGCS2	http://www.pathwaycommons.org/archives/PC2/v12/PathwayCommons12.reconx.hgnc.txt.gz	SCP2 ENTPD3 SUCLG2
0.0820154	3	64	15.4864	MCCC1	http://www.pathwaycommons.org/archives/PC2/v12/PathwayCommons12.reconx.hgnc.txt.gz	SCP2 ENTPD3 SUCLG2
0.0820154	3	64	15.4864	MCCC2	http://www.pathwaycommons.org/archives/PC2/v12/PathwayCommons12.reconx.hgnc.txt.gz	SCP2 ENTPD3 SUCLG2
0.0820154	3	64	15.4864	PANK1	http://www.pathwaycommons.org/archives/PC2/v12/PathwayCommons12.reconx.hgnc.txt.gz	SCP2 ENTPD3 SUCLG2
0.0820154	3	64	15.4864	PANK2	http://www.pathwaycommons.org/archives/PC2/v12/PathwayCommons12.reconx.hgnc.txt.gz	SCP2 ENTPD3 SUCLG2
0.0820154	3	64	15.4864	PANK3	http://www.pathwaycommons.org/archives/PC2/v12/PathwayCommons12.reconx.hgnc.txt.gz	SCP2 ENTPD3 SUCLG2
0.0820154	3	64	15.4864	PANK4	http://www.pathwaycommons.org/archives/PC2/v12/PathwayCommons12.reconx.hgnc.txt.gz	SCP2 ENTPD3 SUCLG2
0.0820154	3	63	15.7322	CCACACA MIR147	http://www.gsea-msigdb.org/gsea/msigdb/cards/CCACACA_MIR147	CTDSPL LIMD1 ROBO2
0.0875933	3	67	14.793	SUCLG2	http://www.pathwaycommons.org/archives/PC2/v12/PathwayCommons12.reconx.hgnc.txt.gz	ALAS1 SCP2 ENTPD3
0.0875933	3	67	14.793	WP3942 PPAR signaling pathway	http://www.wikipathways.org/instance/WP3942_r106517	ACAA1 SCP2 ACOX2
0.0875933	3	67	14.793	Oxidoreductase activity, acting on the CH-CH group of donors	http://amigo.geneontology.org/amigo/term/GO:0016627	ACAA1 DHCR24 ACOX2
0.088912	3	69	14.3642	FOXO4-Forkhead box protein O4 target gene	http://gtrd.biouml.org	EMC3 BTF3L4 BTD
0.0937625	3	71	13.9596	SDS	http://www.pathwaycommons.org/archives/PC2/v12/PathwayCommons12.reconx.hgnc.txt.gz	SCP2 ENTPD3 SUCLG2
0.09512	3	72	13.7657	V$ETF Q6	https://amp.pharm.mssm.edu/Enrichr	ZFYVE9 SSBP3 FAF1
0.0984507	3	73	13.5771	SKIL target gene	http://www.regnetworkweb.org/download/human.zip	DHX30 TRAK1 FAF1
0.101848	3	74	13.3937	SCP2	http://www.pathwaycommons.org/archives/PC2/v12/PathwayCommons12.reconx.hgnc.txt.gz	ACAA1 ENTPD3 SUCLG2
0.104323	3	75	13.2151	PPAR signaling pathway	http://www.genome.jp/kegg-bin/show_pathway?hsa03320	ACAA1 SCP2 ACOX2
0.107106	3	76	13.0412	TNRC6B target gene	http://itfp.biosino.org/itfp	RBM6 CLASP2 SNRK
0.107642	3	77	12.8718	Fatty acid beta-oxidation	http://amigo.geneontology.org/amigo/term/GO:0006635	ACAA1 SCP2 ACOX2
0.109154	3	78	12.7068	WOO LIVER CANCER RECURRENCE DN	http://www.gsea-msigdb.org/gsea/msigdb/cards/WOO_LIVER_CANCER_RECURRENCE_DN	ALAS1 ACAA1 ACOX2
0.110088	3	80	12.3891	BCKDHB	http://www.pathwaycommons.org/archives/PC2/v12/PathwayCommons12.reconx.hgnc.txt.gz	SCP2 ENTPD3 SUCLG2
0.110088	3	80	12.3891	CPT2	http://www.pathwaycommons.org/archives/PC2/v12/PathwayCommons12.reconx.hgnc.txt.gz	SCP2 ENTPD3 SUCLG2
0.110088	3	80	12.3891	ROSS LEUKEMIA WITH MLL FUSIONS	http://www.gsea-msigdb.org/gsea/msigdb/cards/ROSS_LEUKEMIA_WITH_MLL_FUSIONS	SCP2 ARL6IP5 CLASP2
0.111975	3	81	12.2362	HADH	http://www.pathwaycommons.org/archives/PC2/v12/PathwayCommons12.reconx.hgnc.txt.gz	ACAA1 SCP2 GLYCTK
0.11442	3	82	12.087	Peroxisome	http://www.genome.jp/kegg-bin/show_pathway?hsa04146	ACAA1 SCP2 ACOX2
0.116456	3	83	11.9413	ENSG00000136603	https://www.innatedb.com	DHX30 TRAK1 FAF1
0.116456	3	83	11.9413	Hsa-miR-5195-3p target gene	http://mirtarbase.mbc.nctu.edu.tw	VGLL4 ZFYVE9 ANKRD28
0.117926	3	84	11.7992	Hsa-miR-6074 target gene	http://mirtarbase.mbc.nctu.edu.tw	CACNA2D3 PRICKLE2 GNL3
0.122342	3	87	11.3923	Hsa-miR-365b-3p target gene	http://mirtarbase.mbc.nctu.edu.tw	BTF3L4 VGLL4 SNRK
0.124625	3	88	11.2628	Hsa-miR-4706 target gene	http://mirtarbase.mbc.nctu.edu.tw	GNAI2 BTF3L4 VGLL4
0.12894	3	90	11.0126	Microbody part	https://amp.pharm.mssm.edu/Enrichr	ACAA1 SCP2 ACOX2
0.129255	3	91	10.8915	Peroxisomal part	https://amp.pharm.mssm.edu/Enrichr	ACAA1 SCP2 ACOX2
0.13725	3	98	10.1136	ACADM	http://www.pathwaycommons.org/archives/PC2/v12/PathwayCommons12.reconx.hgnc.txt.gz	ACAA1 SCP2 ENTPD3
0.13725	3	98	10.1136	IGARASHI ATF4 TARGETS DN	http://www.gsea-msigdb.org/gsea/msigdb/cards/IGARASHI_ATF4_TARGETS_DN	HSPB11 SUCLG2 TRAK1
0.142059	3	103	9.62263	Regulation of synapse assembly	http://amigo.geneontology.org/amigo/term/GO:0051963	SETD5 AMIGO3 ROBO2
0.142059	3	103	9.62263	HP:0000664 Synophrys	https://hpo.jax.org/app/	DHX30 SETD5 MITF
0.142059	3	103	9.62263	HNRPM target gene	http://itfp.biosino.org/itfp	TXNDC12 TSEN2 SETD5
0.142059	3	104	9.5301	HALLMARK PEROXISOME	http://www.gsea-msigdb.org/gsea/msigdb/cards/HALLMARK_PEROXISOME	ACAA1 DHCR24 SCP2
0.142315	3	105	9.43934	PPARA target gene	http://www.regnetworkweb.org/download/human.zip	ACAA1 SCP2 ACOX2
0.147551	3	107	9.2629	Muscle tendon junction	https://amp.pharm.mssm.edu/Enrichr	RBM6 GNL3 LAMB2
0.147551	3	107	9.2629	ACTWSNACTNY UNKNOWN	http://www.gsea-msigdb.org/gsea/msigdb/cards/ACTWSNACTNY_UNKNOWN	GNAI2 DHX30 RAD54L2
0.14949	3	108	9.17713	GGGCATT MIR365	http://www.gsea-msigdb.org/gsea/msigdb/cards/GGGCATT_MIR365	VGLL4 SNRK ANKRD28
0.152535	3	109	9.09294	Fatty acid catabolic process	http://amigo.geneontology.org/amigo/term/GO:0009062	ACAA1 SCP2 ACOX2
0.152535	3	109	9.09294	HP:0002219 Facial hypertrichosis	https://hpo.jax.org/app/	DHX30 SETD5 MITF
0.155028	3	110	9.01028	Fatty acid oxidation	http://amigo.geneontology.org/amigo/term/GO:0019395	ACAA1 SCP2 ACOX2
0.155028	3	110	9.01028	MEIS2 KD KASUMI1 HUMAN GSE81328 RNASEQ DOWN	https://amp.pharm.mssm.edu/Enrichr	GNAI2 DHCR24 RPL15
0.163435	3	113	8.77107	GCTTGAA MIR498	http://www.gsea-msigdb.org/gsea/msigdb/cards/GCTTGAA_MIR498	CACNA2D3 SNRK ANKRD28
0.169787	3	115	8.61853	STITCH EGCG(CID100001287)	https://genesetdb.auckland.ac.nz	RARB PRKAA2 MITF
0.172205	3	116	8.54423	Hsa-miR-671-5p target gene	https://genie.weizmann.ac.il/pubs/mir07	DOCK3 VGLL4 ROBO2
0.172205	3	116	8.54423	Lipid oxidation	http://amigo.geneontology.org/amigo/term/GO:0034440	ACAA1 SCP2 ACOX2
0.172666	3	117	8.4712	Hsa-miR-768-5p target gene	https://genie.weizmann.ac.il/pubs/mir07	RARB SLMAP MITF
0.175486	3	118	8.39941	ENSG00000185359	https://www.innatedb.com	LRIG1 ZFYVE9 TRAK1
0.17724	3	119	8.32883	GCACCTT MIR18A MIR18B	http://www.gsea-msigdb.org/gsea/msigdb/cards/GCACCTT_MIR18A_MIR18B	CTDSPL CLASP2 PRICKLE2
0.180275	3	120	8.25942	L-cysteine desulfurase complex	https://amp.pharm.mssm.edu/Enrichr	CTDSPL LRIG1 ROBO2
0.180275	3	120	8.25942	ETF Q6	http://www.gsea-msigdb.org/gsea/msigdb/cards/ETF_Q6	ZFYVE9 SSBP3 FAF1
0.182945	3	121	8.19116	TAAYNRNNTCC UNKNOWN	https://amp.pharm.mssm.edu/Enrichr	SSBP3 CACNA2D3 MITF
0.182945	3	121	8.19116	Microbody	https://amp.pharm.mssm.edu/Enrichr	ACAA1 SCP2 ACOX2
0.185601	3	122	8.12402	LEFTY1	http://www.pathwaycommons.org/archives/PC2/v12/PathwayCommons12.reconx.hgnc.txt.gz	ACAA1 ENTPD3 GLYCTK
0.185601	3	122	8.12402	PYCR2	http://www.pathwaycommons.org/archives/PC2/v12/PathwayCommons12.reconx.hgnc.txt.gz	ACAA1 ENTPD3 GLYCTK
0.185601	3	122	8.12402	PYCR3	http://www.pathwaycommons.org/archives/PC2/v12/PathwayCommons12.reconx.hgnc.txt.gz	ACAA1 ENTPD3 GLYCTK
0.187072	3	123	8.05797	PYCR1	http://www.pathwaycommons.org/archives/PC2/v12/PathwayCommons12.reconx.hgnc.txt.gz	ACAA1 ENTPD3 GLYCTK
0.187072	3	123	8.05797	Peroxisomal protein import	https://reactome.org/download/current	ACAA1 SCP2 ACOX2
0.187072	3	123	8.05797	Hsa-miR-210-3p target gene	http://mirtarbase.mbc.nctu.edu.tw	CLASP2 MITF ATG7
0.188675	3	124	7.99299	Hsa-miR-365a-3p target gene	http://mirtarbase.mbc.nctu.edu.tw	BTF3L4 VGLL4 SNRK
0.188675	3	124	7.99299	Hsa-miR-548at-5p target gene	http://mirtarbase.mbc.nctu.edu.tw	TMF1 FBLN2 ANKRD28
0.192263	3	126	7.86611	Leading edge membrane	https://amp.pharm.mssm.edu/Enrichr	FGD5 CLASP2 ROBO2
0.194858	3	127	7.80418	Cholic Acids	http://ctd.mdibl.org	ALAS1 DHCR24 IRAK2
0.194858	3	127	7.80418	Brahma complex	https://amp.pharm.mssm.edu/Enrichr	PRKAA2 AGBL4 MITF
0.0185306	2	3	220.251	Acetyl-CoA C-myristoyltransferase activity	http://amigo.geneontology.org/amigo/term/GO:0050633	ACAA1 SCP2
0.0248795	2	4	165.188	WP1941 Peroxisomal beta-oxidation of tetracosanoyl-CoA	http://www.wikipathways.org/instance/WP1941_r107124	ACAA1 SCP2
0.0248795	2	4	165.188	Palmitoyl-CoA oxidase activity	http://amigo.geneontology.org/amigo/term/GO:0016401	ACAA1 ACOX2
0.0248795	2	4	165.188	ENSG00000101850	https://www.innatedb.com	SUCLG2 MITF
0.0407317	2	6	110.126	CHEBI:27393	http://www.pathwaycommons.org/archives/PC2/v12/PathwayCommons12.reconx.hgnc.txt.gz	SCP2 ACOX2
0.0407317	2	6	110.126	Anterograde axonal transport of mitochondrion	http://amigo.geneontology.org/amigo/term/GO:0098957	TRAK1 AGBL4
0.047066	2	7	94.3934	Acetyl-CoA C-acyltransferase activity	http://amigo.geneontology.org/amigo/term/GO:0003988	ACAA1 SCP2
0.047066	2	7	94.3934	Acyl-CoA oxidase activity	http://amigo.geneontology.org/amigo/term/GO:0003997	ACAA1 ACOX2
0.0516086	2	8	82.5942	TYSND1 cleaves peroxisomal proteins	https://reactome.org/download/current	ACAA1 SCP2
0.0516086	2	8	82.5942	FOXD3 target gene	http://www.grnpedia.org/trrust	RARB MITF
0.0516086	2	8	82.5942	Nucleus-vacuole junction	https://amp.pharm.mssm.edu/Enrichr	LAMB2 ATG7
0.0516086	2	8	82.5942	ENSG00000166147	https://www.innatedb.com	FBLN2 ATXN7
0.0581626	2	9	73.4171	Beta-oxidation of pristanoyl-CoA	https://reactome.org/download/current	SCP2 ACOX2
0.060852	2	10	66.0754	Cellulitis	https://amp.pharm.mssm.edu/Enrichr	TXNDC12 SUCLG2
0.060852	2	10	66.0754	STITCH pristanic acid(CID100123929)	https://genesetdb.auckland.ac.nz	SCP2 ACOX2
0.0677286	2	11	60.0685	Oxidoreductase activity, acting on the CH-CH group of donors, oxygen as acceptor	http://amigo.geneontology.org/amigo/term/GO:0016634	ACAA1 ACOX2
0.0677286	2	11	60.0685	Myristoyltransferase activity	http://amigo.geneontology.org/amigo/term/GO:0019107	ACAA1 SCP2
0.0733515	2	12	55.0628	Lambert-Eaton myasthenic syndrome	https://amp.pharm.mssm.edu/Enrichr	BSN LAMB2
0.0733515	2	12	55.0628	EHMN Trihydroxycoprostanoyl-CoA beta-oxidation	https://genesetdb.auckland.ac.nz	ACAA1 ACOX2
0.0783567	2	13	50.8272	SHMT2	http://www.pathwaycommons.org/archives/PC2/v12/PathwayCommons12.reconx.hgnc.txt.gz	ALAS1 ENTPD3
0.0783567	2	13	50.8272	Alpha-linolenic acid metabolic process	http://amigo.geneontology.org/amigo/term/GO:0036109	ACAA1 SCP2
0.0783567	2	13	50.8272	Cell cortex region	https://amp.pharm.mssm.edu/Enrichr	CLASP2 BSN
0.0783567	2	13	50.8272	ENSG00000163464	https://www.innatedb.com	GNAI2 PDCD6IP
0.0814791	2	14	47.1967	DBI	http://www.pathwaycommons.org/archives/PC2/v12/PathwayCommons12.reconx.hgnc.txt.gz	ACAA1 ENTPD3
0.0814791	2	14	47.1967	GCDH	http://www.pathwaycommons.org/archives/PC2/v12/PathwayCommons12.reconx.hgnc.txt.gz	ACAA1 ENTPD3
0.0814791	2	14	47.1967	Alpha-linolenic omega3 and linoleic omega6 acid metabolism	https://reactome.org/download/current	ACAA1 SCP2
0.0814791	2	14	47.1967	Alpha-linolenic acid ALA metabolism	https://reactome.org/download/current	ACAA1 SCP2
0.0814791	2	14	47.1967	C-terminal protein amino acid modification	http://amigo.geneontology.org/amigo/term/GO:0018410	AGBL4 ATG7
0.0814791	2	14	47.1967	Negative regulation of hippo signaling	http://amigo.geneontology.org/amigo/term/GO:0035331	VGLL4 LIMD1
0.0814791	2	14	47.1967	ENSG00000267855	https://www.innatedb.com	ACAA1 SCP2
0.0814791	2	14	47.1967	STARK BRAIN 22Q11 DELETION	http://www.gsea-msigdb.org/gsea/msigdb/cards/STARK_BRAIN_22Q11_DELETION	BSN TRAK1
0.0820154	2	15	44.0502	CHEBI:57363	http://www.pathwaycommons.org/archives/PC2/v12/PathwayCommons12.reconx.hgnc.txt.gz	ACAA1 ACOX2
0.0820154	2	15	44.0502	Basement membrane assembly	http://amigo.geneontology.org/amigo/term/GO:0070831	CLASP2 LAMB2
0.0820154	2	15	44.0502	EHMN Phytanic acid peroxisomal oxidation	https://genesetdb.auckland.ac.nz	ACAA1 ACOX2
0.0820154	2	15	44.0502	ENSG00000111331	https://www.innatedb.com	DHX30 GNL3
0.0852359	2	16	41.2971	PW:0001060 primary bile acid biosynthetic pathway	ftp://ftp.rgd.mcw.edu/pub/data_release	SCP2 ACOX2
0.0852359	2	16	41.2971	EHMN Omega-3 fatty acid metabolism	https://genesetdb.auckland.ac.nz	ACAA1 ACOX2
0.0852359	2	16	41.2971	FKBP5 target gene	http://itfp.biosino.org/itfp	LIMD1 SETD5
0.0884674	2	17	38.8679	PW:0000039 bile acid biosynthetic pathway	ftp://ftp.rgd.mcw.edu/pub/data_release	SCP2 ACOX2
0.0884674	2	17	38.8679	PW:0001415 Zellweger syndrome pathway	ftp://ftp.rgd.mcw.edu/pub/data_release	SCP2 ACOX2
0.0884674	2	17	38.8679	PW:0001475 cerebrotendinous xanthomatosis pathway	ftp://ftp.rgd.mcw.edu/pub/data_release	SCP2 ACOX2
0.0884674	2	17	38.8679	PW:0002302 familial hypercholanemia pathway	ftp://ftp.rgd.mcw.edu/pub/data_release	SCP2 ACOX2
0.0884674	2	17	38.8679	PW:0002481 congenital bile acid synthesis defect pathway	ftp://ftp.rgd.mcw.edu/pub/data_release	SCP2 ACOX2
0.0884674	2	17	38.8679	Congenita Bil Aci Synthesi Defec Typ II	http://pathbank.org	SCP2 ACOX2
0.0884674	2	17	38.8679	Congenita Bil Aci Synthesi Defec Typ III	http://pathbank.org	SCP2 ACOX2
0.0884674	2	17	38.8679	Familia Hypercholanemi (FHCA)	http://pathbank.org	SCP2 ACOX2
0.0884674	2	17	38.8679	Zellwege Syndrome	http://pathbank.org	SCP2 ACOX2
0.0884674	2	17	38.8679	Cerebrotendinou Xanthomatosi (CTX)	http://pathbank.org	SCP2 ACOX2
0.0884674	2	17	38.8679	27-Hydroxylas Deficiency	http://pathbank.org	SCP2 ACOX2
0.0884674	2	17	38.8679	Primary bile acid biosynthesis	http://www.genome.jp/kegg-bin/show_pathway?hsa00120	SCP2 ACOX2
0.0884674	2	17	38.8679	STITCH phytanic acid(CID100026840)	https://genesetdb.auckland.ac.nz	ACAA1 SCP2
0.0884674	2	17	38.8679	TNKS target gene	http://itfp.biosino.org/itfp	RBM6 ANKRD28
0.0937779	2	18	36.7085	GCSH	http://www.pathwaycommons.org/archives/PC2/v12/PathwayCommons12.reconx.hgnc.txt.gz	ALAS1 ENTPD3
0.0937779	2	18	36.7085	Axonal transport of mitochondrion	http://amigo.geneontology.org/amigo/term/GO:0019896	TRAK1 AGBL4
0.0937779	2	18	36.7085	Retinal ganglion cell	https://amp.pharm.mssm.edu/Enrichr	DOCK3 ROBO2
0.0937779	2	18	36.7085	HP:0011002 Osteopetrosis	https://hpo.jax.org/app/	DHCR24 MITF
0.102448	2	19	34.7765	GLDC	http://www.pathwaycommons.org/archives/PC2/v12/PathwayCommons12.reconx.hgnc.txt.gz	ALAS1 ENTPD3
0.102448	2	19	34.7765	ENSG00000118046	https://www.innatedb.com	PRKAA2 SNRK
0.107642	2	20	33.0377	C-acyltransferase activity	http://amigo.geneontology.org/amigo/term/GO:0016408	ACAA1 SCP2
0.107642	2	20	33.0377	GEMIN5 target gene	http://itfp.biosino.org/itfp	LARS2 MRPL37
0.110088	2	21	31.4645	AGXT2	http://www.pathwaycommons.org/archives/PC2/v12/PathwayCommons12.reconx.hgnc.txt.gz	ALAS1 ENTPD3
0.110088	2	21	31.4645	ETNPPL	http://www.pathwaycommons.org/archives/PC2/v12/PathwayCommons12.reconx.hgnc.txt.gz	ALAS1 ENTPD3
0.110088	2	21	31.4645	Regulation of hippo signaling	http://amigo.geneontology.org/amigo/term/GO:0035330	VGLL4 LIMD1
0.110088	2	21	31.4645	Hsa-miR-147b target gene	http://mirtarbase.mbc.nctu.edu.tw	VGLL4 MITF
0.115237	2	22	30.0343	OLAH	http://www.pathwaycommons.org/archives/PC2/v12/PathwayCommons12.reconx.hgnc.txt.gz	ACAA1 GLYCTK
0.117926	2	23	28.7284	GSK3A	http://www.pathwaycommons.org/archives/PC2/v12/PathwayCommons12.psp.hgnc.txt.gz	MITF ANKRD28
0.117926	2	23	28.7284	EHMN Saturated fatty acids beta-oxidation	https://genesetdb.auckland.ac.nz	ACAA1 ACOX2
0.117926	2	23	28.7284	HP:0004751 Paroxysmal ventricular tachycardia	https://hpo.jax.org/app/	GNAI2 SLMAP
0.117926	2	23	28.7284	ENSG00000182177	https://www.innatedb.com	RBM6 RPL15
0.117926	2	23	28.7284	HASLINGER B CLL WITH 17P13 DELETION	http://www.gsea-msigdb.org/gsea/msigdb/cards/HASLINGER_B_CLL_WITH_17P13_DELETION	GNAI2 SCP2
0.123507	2	24	27.5314	Synthesis of bile acids and bile salts via 7alpha-hydroxycholesterol	https://reactome.org/download/current	SCP2 ACOX2
0.123507	2	24	27.5314	ITT (HMDB00189)	https://amp.pharm.mssm.edu/Enrichr	ENTPD3 SUCLG2
0.123507	2	24	27.5314	STITCH creatine(CID100000586)	https://genesetdb.auckland.ac.nz	PRKAA2 MITF
0.12894	2	25	26.4301	CHEBI:57392	http://www.pathwaycommons.org/archives/PC2/v12/PathwayCommons12.reconx.hgnc.txt.gz	ACAA1 SCP2
0.12894	2	25	26.4301	5'-IDP (HMDB03335)	https://amp.pharm.mssm.edu/Enrichr	ENTPD3 SUCLG2
0.12894	2	25	26.4301	STITCH creatine(CID000000586)	https://genesetdb.auckland.ac.nz	PRKAA2 MITF
0.12894	2	25	26.4301	STITCH suc-coa(CID000001111)	https://genesetdb.auckland.ac.nz	ALAS1 SUCLG2
0.12894	2	25	26.4301	HP:0010663 Abnormality of thalamus morphology	https://hpo.jax.org/app/	SCP2 SETD5
0.12894	2	25	26.4301	ENSG00000127314	https://www.innatedb.com	ALAS1 FAF1
0.129255	2	26	25.4136	PW:0001670 sarcosinemia pathway	ftp://ftp.rgd.mcw.edu/pub/data_release	ALAS1 GLYCTK
0.129255	2	26	25.4136	PW:0001808 nonketotic hyperglycinemia pathway	ftp://ftp.rgd.mcw.edu/pub/data_release	ALAS1 GLYCTK
0.129255	2	26	25.4136	PW:0002209 dimethylglycine dehydrogenase deficiency pathway	ftp://ftp.rgd.mcw.edu/pub/data_release	ALAS1 GLYCTK
0.129255	2	26	25.4136	PW:0002210 dihydropyrimidine dehydrogenase deficiency pathway	ftp://ftp.rgd.mcw.edu/pub/data_release	ALAS1 GLYCTK
0.129255	2	26	25.4136	Dimethylglycin Dehydrogenas Deficiency	http://pathbank.org	ALAS1 GLYCTK
0.129255	2	26	25.4136	Dihydropyrimidin Dehydrogenas Deficienc (DHPD)	http://pathbank.org	ALAS1 GLYCTK
0.129255	2	26	25.4136	Sarcosinemia	http://pathbank.org	ALAS1 GLYCTK
0.129255	2	26	25.4136	Non-Ketoti Hyperglycinemia	http://pathbank.org	ALAS1 GLYCTK
0.129255	2	26	25.4136	Hyperglycinemi Non-Ketotic	http://pathbank.org	ALAS1 GLYCTK
0.129255	2	26	25.4136	3-Phosphoglycerat Dehydrogenas Deficiency	http://pathbank.org	ALAS1 GLYCTK
0.129255	2	26	25.4136	WP2878 PPAR Alpha Pathway	http://www.wikipathways.org/instance/WP2878_r106549	ACAA1 SCP2
0.129255	2	26	25.4136	Outflow tract septum morphogenesis	http://amigo.geneontology.org/amigo/term/GO:0003148	RARB ROBO2
0.129255	2	26	25.4136	Establishment of mitochondrion localization, microtubule-mediated	http://amigo.geneontology.org/amigo/term/GO:0034643	TRAK1 AGBL4
0.129255	2	26	25.4136	Mitochondrion transport along microtubule	http://amigo.geneontology.org/amigo/term/GO:0047497	TRAK1 AGBL4
0.129255	2	26	25.4136	STITCH succinyl-CoA(CID000439161)	https://genesetdb.auckland.ac.nz	ALAS1 SUCLG2
0.132742	2	27	24.4724	Biosynthesis of unsaturated fatty acids	http://www.genome.jp/kegg-bin/show_pathway?hsa01040	ACAA1 SCP2
0.132742	2	27	24.4724	EHMN Omega-6 fatty acid metabolism	https://genesetdb.auckland.ac.nz	ACAA1 ACOX2
0.132742	2	27	24.4724	NGUYEN NOTCH1 TARGETS UP	http://www.gsea-msigdb.org/gsea/msigdb/cards/NGUYEN_NOTCH1_TARGETS_UP	ARL6IP5 LAMB2
0.136179	2	28	23.5983	CHEBI:15428	http://www.pathwaycommons.org/archives/PC2/v12/PathwayCommons12.reconx.hgnc.txt.gz	ALAS1 ENTPD3
0.136179	2	28	23.5983	Hsa-miR-100 target gene	https://genie.weizmann.ac.il/pubs/mir07	CTDSPL ANKRD28
0.136179	2	28	23.5983	Hsa-miR-99a target gene	https://genie.weizmann.ac.il/pubs/mir07	CTDSPL ANKRD28
0.136179	2	28	23.5983	Hsa-miR-99b target gene	https://genie.weizmann.ac.il/pubs/mir07	CTDSPL ANKRD28
0.136179	2	28	23.5983	ENSG00000033178	https://www.innatedb.com	LIMD1 PDCD6IP
0.141161	2	29	22.7846	CROT	http://www.pathwaycommons.org/archives/PC2/v12/PathwayCommons12.reconx.hgnc.txt.gz	ACAA1 SCP2
0.141161	2	29	22.7846	Negative regulation of microtubule depolymerization	http://amigo.geneontology.org/amigo/term/GO:0007026	CLASP2 ATXN7
0.141161	2	29	22.7846	STITCH succinyl-CoA(CID100001111)	https://genesetdb.auckland.ac.nz	ALAS1 SUCLG2
0.141161	2	29	22.7846	HP:0002179 Opisthotonus	https://hpo.jax.org/app/	TSEN2 GLYCTK
0.142059	2	30	22.0251	ACOX3	http://www.pathwaycommons.org/archives/PC2/v12/PathwayCommons12.reconx.hgnc.txt.gz	ACAA1 SCP2
0.142059	2	30	22.0251	ALDH6A1	http://www.pathwaycommons.org/archives/PC2/v12/PathwayCommons12.reconx.hgnc.txt.gz	ACAA1 SCP2
0.142059	2	30	22.0251	Neuron death in response to oxidative stress	http://amigo.geneontology.org/amigo/term/GO:0036475	ARL6IP5 ATG7
0.142059	2	30	22.0251	Establishment of mitochondrion localization	http://amigo.geneontology.org/amigo/term/GO:0051654	TRAK1 AGBL4
0.142059	2	31	21.3146	Axonal growth cone	http://amigo.geneontology.org/amigo/term/GO:0044295	CLASP2 TRAK1
0.142059	2	31	21.3146	T3DB "Cobalt(II III) oxide"	https://genesetdb.auckland.ac.nz	ALAS1 CACNA2D3
0.142059	2	31	21.3146	T3DB "Dichlorobis(ethylenediamine)cobalt(III) chloride cis-"	https://genesetdb.auckland.ac.nz	ALAS1 CACNA2D3
0.142059	2	31	21.3146	T3DB "Dichlorobis(ethylenediamine)cobalt(III) chloride trans-"	https://genesetdb.auckland.ac.nz	ALAS1 CACNA2D3
0.142059	2	31	21.3146	T3DB Bis(3-fluorosalicylaldehyde)-ethylenediimine-cobalt	https://genesetdb.auckland.ac.nz	ALAS1 CACNA2D3
0.142059	2	31	21.3146	T3DB Cobalt	https://genesetdb.auckland.ac.nz	ALAS1 CACNA2D3
0.142059	2	31	21.3146	T3DB Cobalt(II) acetate	https://genesetdb.auckland.ac.nz	ALAS1 CACNA2D3
0.142059	2	31	21.3146	T3DB Cobalt(II) acetate tetrahydrate	https://genesetdb.auckland.ac.nz	ALAS1 CACNA2D3
0.142059	2	31	21.3146	T3DB Cobalt(II) bromide hydrate	https://genesetdb.auckland.ac.nz	ALAS1 CACNA2D3
0.142059	2	31	21.3146	T3DB Cobalt(II) carbonate	https://genesetdb.auckland.ac.nz	ALAS1 CACNA2D3
0.142059	2	31	21.3146	T3DB Cobalt(II) carbonate hydroxide (1:1)	https://genesetdb.auckland.ac.nz	ALAS1 CACNA2D3
0.142059	2	31	21.3146	T3DB Cobalt(II) carbonate hydroxide (2:3)	https://genesetdb.auckland.ac.nz	ALAS1 CACNA2D3
0.142059	2	31	21.3146	T3DB Cobalt(II) carbonate hydroxide (2:3) monohydrate	https://genesetdb.auckland.ac.nz	ALAS1 CACNA2D3
0.142059	2	31	21.3146	T3DB Cobalt(II) chloride	https://genesetdb.auckland.ac.nz	ALAS1 CACNA2D3
0.142059	2	31	21.3146	T3DB Cobalt(II) chloride dihydrate	https://genesetdb.auckland.ac.nz	ALAS1 CACNA2D3
0.142059	2	31	21.3146	T3DB Cobalt(II) chloride hexahydrate	https://genesetdb.auckland.ac.nz	ALAS1 CACNA2D3
0.142059	2	31	21.3146	T3DB Cobalt(II) citrate	https://genesetdb.auckland.ac.nz	ALAS1 CACNA2D3
0.142059	2	31	21.3146	T3DB Cobalt(II) fluoride	https://genesetdb.auckland.ac.nz	ALAS1 CACNA2D3
0.142059	2	31	21.3146	T3DB Cobalt(II) formate	https://genesetdb.auckland.ac.nz	ALAS1 CACNA2D3
0.142059	2	31	21.3146	T3DB Cobalt(II) hydroxide	https://genesetdb.auckland.ac.nz	ALAS1 CACNA2D3
0.142059	2	31	21.3146	T3DB Cobalt(II) iodide	https://genesetdb.auckland.ac.nz	ALAS1 CACNA2D3
0.142059	2	31	21.3146	T3DB Cobalt(II) mesoporphyrin	https://genesetdb.auckland.ac.nz	ALAS1 CACNA2D3
0.142059	2	31	21.3146	T3DB Cobalt(II) molybdenum(VI) oxide	https://genesetdb.auckland.ac.nz	ALAS1 CACNA2D3
0.142059	2	31	21.3146	T3DB Cobalt(II) naphthenate	https://genesetdb.auckland.ac.nz	ALAS1 CACNA2D3
0.142059	2	31	21.3146	T3DB Cobalt(II) nitrate hexahydrate	https://genesetdb.auckland.ac.nz	ALAS1 CACNA2D3
0.142059	2	31	21.3146	T3DB Cobalt(II) oxide	https://genesetdb.auckland.ac.nz	ALAS1 CACNA2D3
0.142059	2	31	21.3146	T3DB Cobalt(II) succinate	https://genesetdb.auckland.ac.nz	ALAS1 CACNA2D3
0.142059	2	31	21.3146	T3DB Cobalt(II) sulfamate	https://genesetdb.auckland.ac.nz	ALAS1 CACNA2D3
0.142059	2	31	21.3146	T3DB Cobalt(II) sulfate	https://genesetdb.auckland.ac.nz	ALAS1 CACNA2D3
0.142059	2	31	21.3146	T3DB Cobalt(II) sulfate heptahydrate	https://genesetdb.auckland.ac.nz	ALAS1 CACNA2D3
0.142059	2	31	21.3146	T3DB Cobalt(II) sulfate monohydrate	https://genesetdb.auckland.ac.nz	ALAS1 CACNA2D3
0.142059	2	31	21.3146	T3DB Cobalt(III) acetate	https://genesetdb.auckland.ac.nz	ALAS1 CACNA2D3
0.142059	2	31	21.3146	T3DB Cobalt(III) fluoride	https://genesetdb.auckland.ac.nz	ALAS1 CACNA2D3
0.142059	2	31	21.3146	T3DB Cobalt(III) hydroxide	https://genesetdb.auckland.ac.nz	ALAS1 CACNA2D3
0.142059	2	31	21.3146	T3DB Cobalt(III) oxide	https://genesetdb.auckland.ac.nz	ALAS1 CACNA2D3
0.142059	2	31	21.3146	T3DB Cobalt(III) oxide monohydrate	https://genesetdb.auckland.ac.nz	ALAS1 CACNA2D3
0.142059	2	31	21.3146	T3DB Cobalt (II) carbonate hydrate	https://genesetdb.auckland.ac.nz	ALAS1 CACNA2D3
0.142059	2	31	21.3146	T3DB Cobalt bis(2-ethylhexanoate)	https://genesetdb.auckland.ac.nz	ALAS1 CACNA2D3
0.142059	2	31	21.3146	T3DB Cobalt sulfide	https://genesetdb.auckland.ac.nz	ALAS1 CACNA2D3
0.142059	2	31	21.3146	T3DB Cobaltocene	https://genesetdb.auckland.ac.nz	ALAS1 CACNA2D3
0.142059	2	31	21.3146	T3DB Cobamamide	https://genesetdb.auckland.ac.nz	ALAS1 CACNA2D3
0.142059	2	31	21.3146	T3DB Cyclopentadienylcobalt dicarbonyl	https://genesetdb.auckland.ac.nz	ALAS1 CACNA2D3
0.142059	2	31	21.3146	T3DB Dicobalt edetate	https://genesetdb.auckland.ac.nz	ALAS1 CACNA2D3
0.142059	2	31	21.3146	T3DB Dicobalt octacarbonyl	https://genesetdb.auckland.ac.nz	ALAS1 CACNA2D3
0.142059	2	31	21.3146	T3DB Hexamminecobalt(III) chloride	https://genesetdb.auckland.ac.nz	ALAS1 CACNA2D3
0.142059	2	31	21.3146	T3DB Lithium cobalt oxide	https://genesetdb.auckland.ac.nz	ALAS1 CACNA2D3
0.142059	2	31	21.3146	T3DB Methylcobalamin	https://genesetdb.auckland.ac.nz	ALAS1 CACNA2D3
0.142059	2	31	21.3146	T3DB Salcomine	https://genesetdb.auckland.ac.nz	ALAS1 CACNA2D3
0.142059	2	31	21.3146	T3DB Tetracobalt dodecacarbonyl	https://genesetdb.auckland.ac.nz	ALAS1 CACNA2D3
0.142059	2	31	21.3146	T3DB Tris(ethylenediamine)cobalt(III) chloride	https://genesetdb.auckland.ac.nz	ALAS1 CACNA2D3
0.142059	2	30	22.0251	HP:0007676 Hypoplasia of the iris	https://hpo.jax.org/app/	LAMB2 MITF
0.147551	2	32	20.6486	TAK1 activates NFkB by phosphorylation and activation of IKKs complex	https://reactome.org/download/current	IRAK2 NKIRAS1
0.147551	2	32	20.6486	Cadmium sulfide	http://ctd.mdibl.org	DHCR24 ATG7
0.147551	2	32	20.6486	PW:0000047 glycine serine and threonine metabolic pathway	ftp://ftp.rgd.mcw.edu/pub/data_release	ALAS1 GLYCTK
0.147551	2	32	20.6486	Basement membrane organization	http://amigo.geneontology.org/amigo/term/GO:0071711	CLASP2 LAMB2
0.147551	2	32	20.6486	U4/U6 snRNP	https://amp.pharm.mssm.edu/Enrichr	RRP9 SUCLG2
0.147551	2	32	20.6486	T3DB Cobalt(II) bromide	https://genesetdb.auckland.ac.nz	ALAS1 CACNA2D3
0.154055	2	33	20.0228	ASCC2 target gene	http://www.regnetworkweb.org/download/human.zip	GNL3 FAF1
0.154055	2	33	20.0228	Regulation of microtubule depolymerization	http://amigo.geneontology.org/amigo/term/GO:0031114	CLASP2 ATXN7
0.16017	2	34	19.4339	Synthesis of bile acids and bile salts	https://reactome.org/download/current	SCP2 ACOX2
0.16017	2	34	19.4339	Ureteric bud	https://amp.pharm.mssm.edu/Enrichr	BSN ROBO2
0.167364	2	35	18.8787	Very long-chain fatty acid metabolic process	http://amigo.geneontology.org/amigo/term/GO:0000038	ACAA1 ACOX2
0.17221	2	36	18.3543	HSD17B10	http://www.pathwaycommons.org/archives/PC2/v12/PathwayCommons12.reconx.hgnc.txt.gz	ACAA1 GLYCTK
0.17221	2	36	18.3543	SLC25A10	http://www.pathwaycommons.org/archives/PC2/v12/PathwayCommons12.reconx.hgnc.txt.gz	ENTPD3 SUCLG2
0.17221	2	36	18.3543	FAD binding	http://amigo.geneontology.org/amigo/term/GO:0071949	DHCR24 ACOX2
0.176822	2	37	17.8582	Negative regulation of cell junction assembly	http://amigo.geneontology.org/amigo/term/GO:1901889	CLASP2 ROBO2
0.176822	2	37	17.8582	HP:0011712 Right bundle branch block	https://hpo.jax.org/app/	GNAI2 SLMAP
0.182945	2	38	17.3883	HOXC11 target gene experimental Jolma-2013	http://www.fiserlab.org/tf2dna_db	IRAK2 CLASP2
0.182945	2	38	17.3883	CBX5 (human)	https://amp.pharm.mssm.edu/Enrichr	PRICKLE2 BTD
0.187072	2	39	16.9424	CTNNB1 DOWN target gene	http://www.tfacts.org	FBLN2 PDCD6IP
0.187072	2	39	16.9424	Fatty acid binding	http://amigo.geneontology.org/amigo/term/GO:0005504	SCP2 ACOX2
0.187072	2	39	16.9424	HP:0001488 Bilateral ptosis	https://hpo.jax.org/app/	SETD5 LAMB2
0.187072	2	39	16.9424	Hsa-miR-10a target gene	http://biocluster.di.unito.it/circuits	C3orf18 PRKAA2
0.187072	2	39	16.9424	Hsa-miR-10b target gene	http://biocluster.di.unito.it/circuits	C3orf18 PRKAA2
0.19141	2	40	16.5188	AMT	http://www.pathwaycommons.org/archives/PC2/v12/PathwayCommons12.reconx.hgnc.txt.gz	ALAS1 ENTPD3
0.19141	2	40	16.5188	Bile acid biosynthetic process	http://amigo.geneontology.org/amigo/term/GO:0006699	SCP2 ACOX2
0.19141	2	40	16.5188	Glycine, serine and threonine metabolism	http://www.genome.jp/kegg-bin/show_pathway?hsa00260	ALAS1 GLYCTK
0.19141	2	40	16.5188	T3DB Cyanocobalamin	https://genesetdb.auckland.ac.nz	ALAS1 CACNA2D3
0.19141	2	40	16.5188	EPPERT LSC R	http://www.gsea-msigdb.org/gsea/msigdb/cards/EPPERT_LSC_R	FRMD4B VGLL4
0.195348	2	41	16.1159	Hsa-miR-451 target gene	https://genie.weizmann.ac.il/pubs/mir07	PRICKLE2 SETD5
0.195348	2	41	16.1159	T3DB Cobalt(II) nitrate	https://genesetdb.auckland.ac.nz	ALAS1 CACNA2D3
0.195348	2	41	16.1159	T3DB Hydroxocobalamin	https://genesetdb.auckland.ac.nz	ALAS1 CACNA2D3
0.195348	2	41	16.1159	T3DB Potassium cobaltinitrite	https://genesetdb.auckland.ac.nz	ALAS1 CACNA2D3
0.195348	2	41	16.1159	T3DB Sodium cobaltinitrite	https://genesetdb.auckland.ac.nz	ALAS1 CACNA2D3
