# Supplementary material for: An Integrative Analysis of Chromatin Interactions, Gene Expression and Genomic Variants Identifies 30 Likely Regulatory Variants in Prostate Cancer
Source: Preprints.org preprint supplement (doi:10.20944/preprints202301.0343.v1), 2023-01-19
Supplement: Supplementary file 9 [file SupplementaryTable9.xlsx]

## Sheet: Supplementary Table 9a
Supplementary Table 9a. List of H3k27ac ChIP-seq peak regions in LNCaP cell line
Chromosomes	Start	End
1	9750	10800
1	567100	568150
1	569500	570300
1	712800	715950
1	739700	741700
1	742700	743750
1	746050	748550
1	749650	756150
1	760650	763700
1	815100	815850
1	825600	826150
1	838700	841100
1	851700	853050
1	855400	856850
1	858800	861150
1	867700	869500
1	893650	897500
1	901000	903050
1	911050	912350
1	933700	938050
1	939900	941600
1	947350	950950
1	954450	956900
1	975350	976450
1	1001800	1005500
1	1008400	1010500
1	1013850	1016300
1	1050350	1051850
1	1060250	1060950
1	1065150	1066600
1	1067100	1069500
1	1088350	1090250
1	1092500	1094000
1	1097100	1101650
1	1164500	1169800
1	1171550	1174050
1	1176000	1177200
1	1195950	1196550
1	1206350	1209700
1	1216700	1218400
1	1239600	1241550
1	1242100	1247100
1	1250850	1255950
1	1259200	1262400
1	1278400	1285700
1	1290000	1291650
1	1309000	1312850
1	1332900	1339550
1	1340200	1340850
1	1341050	1344400
1	1353500	1354850
1	1367400	1372100
1	1405200	1409950
1	1438750	1443350
1	1445400	1449600
1	1478750	1480700
1	1493650	1496000
1	1499700	1501950
1	1502350	1504000
1	1504700	1505650
1	1507950	1512400
1	1534700	1535750
1	1544100	1548250
1	1548500	1552550
1	1589200	1592050
1	1609350	1614150
1	1617500	1618450
1	1623300	1625850
1	1652950	1653500
1	1654450	1658350
1	1677200	1678300
1	1687850	1692250
1	1693950	1694600
1	1705600	1715500
1	1737650	1739100
1	1758350	1759200
1	1759350	1761450
1	1763050	1767850
1	1770450	1775000
1	1777150	1780600
1	1784050	1786700
1	1788150	1793300
1	1800800	1802350
1	1803100	1806250
1	1807200	1807800
1	1814150	1815950
1	1817650	1818400
1	1820300	1824300
1	1825550	1826850
1	1828500	1829100
1	1838000	1839150
1	1839500	1842000
1	1849450	1851100
1	1932450	1934300
1	1980250	1982850
1	2003100	2004050
1	2012650	2014800
1	2028700	2030500
1	2036150	2037200
1	2042850	2045050
1	2064000	2064700
1	2064750	2065750
1	2120100	2123150
1	2125400	2127650
1	2130000	2131650
1	2138900	2140750
1	2158200	2159600
1	2159800	2164500
1	2168700	2172450
1	2177700	2184350
1	2185400	2188400
1	2188850	2190900
1	2201600	2202200
1	2321950	2326050
1	2334150	2337650
1	2338650	2339450
1	2339500	2346400
1	2346500	2347250
1	2368800	2370750
1	2411100	2414100
1	2425500	2426900
1	2453550	2456450
1	2456600	2460250
1	2461550	2463000
1	2472750	2473800
1	2476650	2481800
1	2514750	2519300
1	2523650	2525200
1	2584750	2586600
1	3043000	3044800
1	3081150	3082950
1	3086850	3088200
1	3249950	3251800
1	3369600	3372500
1	3375750	3377450
1	3397900	3400000
1	3401700	3402700
1	3445500	3446450
1	3447350	3447900
1	3463450	3464850
1	3469300	3470900
1	3503150	3504900
1	3540500	3543100
1	3576450	3577000
1	3584850	3586300
1	3689150	3690300
1	3692950	3693950
1	3696500	3699650
1	3710450	3714800
1	3772250	3775350
1	3780800	3782400
1	3815350	3818300
1	4471200	4472050
1	4656100	4658150
1	4790100	4790750
1	5657350	5659550
1	5719750	5721150
1	5730250	5731300
1	5731950	5733450
1	5733850	5734750
1	5786550	5788550
1	5825400	5826250
1	5955400	5957500
1	5962450	5964350
1	6008300	6010400
1	6045850	6046550
1	6051550	6053000
1	6085250	6086950
1	6118350	6119850
1	6216700	6219050
1	6257750	6261100
1	6264850	6267450
1	6279400	6282000
1	6294300	6296750
1	6354900	6355900
1	6361950	6363800
1	6403550	6404550
1	6413750	6414800
1	6419500	6420200
1	6424750	6425800
1	6433700	6434950
1	6451700	6455200
1	6471950	6474200
1	6486850	6489250
1	6489850	6491950
1	6550200	6551500
1	6579800	6581150
1	6612900	6615700
1	6638650	6643200
1	6659900	6664150
1	6672000	6675200
1	6681950	6686900
1	6745900	6746750
1	6760350	6762450
1	6803000	6804800
1	6843150	6846650
1	6855650	6856450
1	6860250	6861800
1	6870750	6872100
1	6892500	6893600
1	6958950	6960700
1	6962100	6963750
1	6969100	6971150
1	7018750	7021400
1	7025000	7026100
1	7258700	7259600
1	7325350	7326850
1	7359100	7360050
1	7386300	7386850
1	7391550	7393300
1	7395200	7395900
1	7399500	7400500
1	7438700	7440100
1	7440550	7441200
1	7446850	7448450
1	7462050	7462750
1	7515050	7516300
1	7550700	7552700
1	7609450	7610200
1	7631050	7636250
1	7709050	7709700
1	7764750	7765350
1	7776950	7778750
1	7786300	7787500
1	7805750	7807050
1	7812400	7813050
1	7830500	7832900
1	7842650	7845000
1	7846450	7848500
1	8013100	8015300
1	8019450	8023500
1	8027000	8027550
1	8027650	8028700
1	8028800	8032500
1	8032900	8033500
1	8033950	8036500
1	8040800	8041650
1	8047400	8049100
1	8063650	8068300
1	8074600	8081850
1	8082200	8084150
1	8084500	8087350
1	8088450	8089000
1	8098950	8101850
1	8117250	8117800
1	8118200	8119650
1	8120450	8122850
1	8129150	8132550
1	8137000	8139100
1	8142700	8145450
1	8146650	8147200
1	8228700	8231300
1	8233900	8234950
1	8241200	8243950
1	8249350	8250600
1	8253900	8255700
1	8303550	8305450
1	8316950	8321600
1	8326050	8327800
1	8377950	8378600
1	8402750	8404600
1	8431300	8432000
1	8432600	8435450
1	8438650	8439250
1	8456550	8458450
1	8463850	8465450
1	8465900	8486500
1	8495250	8496950
1	8497350	8500900
1	8507900	8510850
1	8515650	8517450
1	8521100	8525250
1	8526450	8528600
1	8533800	8534800
1	8537600	8538550
1	8541200	8545750
1	8545950	8546550
1	8546800	8552450
1	8553400	8554150
1	8576650	8579000
1	8583250	8587600
1	8600450	8601050
1	8607500	8608100
1	8608300	8609200
1	8611250	8612550
1	8614700	8616200
1	8621200	8622200
1	8630200	8633150
1	8634800	8636200
1	8650400	8651450
1	8655500	8656500
1	8657700	8658550
1	8662600	8664200
1	8668750	8670300
1	8671950	8672700
1	8679800	8680400
1	8688300	8691350
1	8691950	8692800
1	8693350	8695850
1	8696650	8698950
1	8702600	8706050
1	8706300	8707350
1	8711600	8712500
1	8720450	8723200
1	8729850	8730600
1	8731850	8733250
1	8733450	8735500
1	8738700	8743000
1	8752550	8753750
1	8758250	8767600
1	8771400	8774350
1	8783100	8783850
1	8788650	8791300
1	8792950	8794300
1	8801400	8803350
1	8846700	8849450
1	8857100	8858350
1	8861850	8862750
1	8876050	8879150
1	8882600	8883650
1	8907800	8909450
1	8918100	8919800
1	8924250	8924900
1	8928900	8929800
1	8931050	8932800
1	8932850	8942050
1	8949150	8951600
1	8957400	8958400
1	8963850	8964450
1	9045450	9047350
1	9060300	9063750
1	9087250	9088350
1	9130150	9131450
1	9172150	9176150
1	9181400	9183500
1	9183600	9191250
1	9220250	9228700
1	9239550	9240400
1	9240750	9243550
1	9245850	9247900
1	9293750	9296100
1	9296850	9299950
1	9301250	9305950
1	9311050	9312950
1	9317700	9321000
1	9330050	9331150
1	9352550	9353950
1	9362600	9363700
1	9371850	9373050
1	9398000	9399950
1	9443950	9445950
1	9488000	9490200
1	9494050	9499650
1	9512300	9513600
1	9536200	9538050
1	9541850	9543650
1	9571550	9574200
1	9586350	9587350
1	9590900	9591950
1	9595750	9625350
1	9625750	9627550
1	9627750	9628450
1	9629400	9629950
1	9630400	9631350
1	9632950	9633500
1	9636150	9637100
1	9638650	9639700
1	9646450	9647000
1	9647900	9650500
1	9653450	9654000
1	9665900	9668100
1	9805200	9808150
1	9829950	9830850
1	9840650	9844050
1	9844150	9844950
1	9852100	9853150
1	9864500	9865550
1	9868300	9869300
1	9870400	9872900
1	9874000	9876900
1	9881700	9887500
1	9894950	9897400
1	9900050	9900750
1	9901900	9905100
1	9918900	9920550
1	9952400	9954500
1	9959300	9963100
1	9967450	9968100
1	9968600	9972900
1	10002000	10004850
1	10009700	10011850
1	10091900	10096700
1	10104650	10108900
1	10109450	10111950
1	10114800	10118350
1	10131150	10132350
1	10161750	10162750
1	10165300	10166250
1	10167000	10170700
1	10175850	10178700
1	10268950	10273700
1	10275350	10276900
1	10277650	10279050
1	10312350	10315500
1	10315900	10316600
1	10317400	10318900
1	10351650	10353250
1	10357900	10360950
1	10436700	10441600
1	10446650	10449300
1	10457650	10460400
1	10474600	10476550
1	10484150	10485050
1	10487700	10488600
1	10489950	10491850
1	10497750	10500250
1	10518450	10520450
1	10531500	10533300
1	10534450	10536500
1	10554600	10556150
1	10567550	10568550
1	10569600	10572850
1	10574350	10575000
1	10575150	10577800
1	10578800	10580050
1	10582550	10583950
1	10587850	10589550
1	10615450	10616500
1	10625050	10628300
1	10667100	10668250
1	10688200	10690050
1	10694400	10699100
1	10700100	10700950
1	10702250	10703600
1	10711700	10713650
1	10723750	10725000
1	10725250	10755900
1	10757650	10760900
1	10769950	10771750
1	10773400	10776050
1	10781550	10782850
1	10782950	10788550
1	10797750	10799150
1	10801100	10802300
1	10820650	10823100
1	10824850	10827350
1	10833750	10842200
1	10848000	10857500
1	10863450	10865500
1	10874450	10876300
1	11039450	11041000
1	11071600	11075000
1	11078500	11079350
1	11118500	11122300
1	11122850	11123550
1	11131350	11133450
1	11157800	11160850
1	11194200	11195450
1	11211250	11213700
1	11216050	11220150
1	11229150	11231400
1	11237850	11240400
1	11305050	11307400
1	11315150	11317750
1	11321300	11323850
1	11332350	11334950
1	11340750	11343450
1	11381250	11382600
1	11402500	11403200
1	11463700	11464800
1	11480700	11482500
1	11515400	11516700
1	11543400	11546050
1	11740450	11742750
1	11791950	11792800
1	11795100	11800550
1	11800750	11803350
1	11864100	11869400
1	11871900	11875150
1	11940450	11941200
1	11967400	11971050
1	11978000	11979800
1	11983650	11984250
1	11985600	11986650
1	11986750	11987300
1	11989400	11990600
1	11993850	11995800
1	12020600	12021950
1	12027850	12030250
1	12037300	12042000
1	12049500	12053050
1	12078650	12080850
1	12203650	12204500
1	12217600	12218700
1	12221250	12222700
1	12248300	12249750
1	12289650	12293750
1	12303750	12306800
1	12311000	12312400
1	12369400	12370950
1	12415200	12417650
1	12419400	12420000
1	12427850	12429950
1	12436000	12436800
1	12439900	12443350
1	12466900	12467850
1	12473350	12473900
1	12510350	12511450
1	12512950	12515000
1	12521000	12522250
1	12523850	12525700
1	12529600	12530600
1	12534200	12540000
1	12544950	12545850
1	12545950	12546500
1	12555650	12557700
1	12587650	12589850
1	12647450	12649150
1	12650600	12652050
1	12655500	12659650
1	12659700	12661300
1	12664000	12664750
1	12674450	12678050
1	12709750	12710350
1	12714100	12714950
1	12767750	12769350
1	12804650	12807050
1	13869600	13871350
1	13876800	13877750
1	13882350	13883550
1	13918900	13920150
1	13925550	13927250
1	13945750	13947350
1	13988250	13990100
1	14025900	14027700
1	14040450	14042600
1	14074150	14077300
1	14082400	14089750
1	14107650	14108200
1	14117550	14118100
1	14118150	14118850
1	14123350	14129350
1	14138950	14139950
1	14155350	14156150
1	14185800	14187850
1	14226500	14228850
1	14366350	14367300
1	14435050	14435600
1	14460300	14462750
1	14463100	14464800
1	14468350	14469500
1	14494200	14495250
1	14617450	14618650
1	14687650	14688200
1	14746850	14755050
1	14791700	14793100
1	14823600	14827750
1	14843150	14844750
1	14976750	14977350
1	15026200	15027600
1	15063550	15065950
1	15067900	15069850
1	15237300	15238250
1	15255350	15257150
1	15263400	15264550
1	15271800	15272750
1	15280000	15283650
1	15300600	15301300
1	15312500	15313650
1	15320900	15322500
1	15340700	15344950
1	15478350	15480100
1	15505150	15506650
1	15523100	15524100
1	15526400	15528350
1	15544000	15546100
1	15610450	15612850
1	15648550	15650500
1	15655150	15655750
1	15665450	15667100
1	15667650	15672050
1	15678400	15679800
1	15735650	15736750
1	15741850	15743600
1	15836500	15838350
1	15848800	15855450
1	15864500	15865800
1	15876650	15878700
1	15882900	15889750
1	15900650	15901850
1	15904050	15905000
1	15905550	15906950
1	15927100	15930350
1	15931650	15932400
1	15935550	15937800
1	15940950	15949000
1	15949100	15954750
1	15967050	15969700
1	16009950	16012700
1	16034700	16036050
1	16094300	16094950
1	16106450	16108150
1	16125600	16127500
1	16158800	16163700
1	16172800	16179750
1	16180200	16180850
1	16184000	16185950
1	16211500	16214350
1	16229150	16230150
1	16237850	16238800
1	16265000	16266800
1	16280350	16281300
1	16301000	16303050
1	16339800	16340800
1	16417100	16418650
1	16421650	16422600
1	16445800	16450300
1	16471050	16472750
1	16481050	16482300
1	16499250	16500800
1	16500950	16504200
1	16504350	16506800
1	16532350	16534400
1	16562000	16566400
1	16573000	16576950
1	16602150	16603750
1	16626150	16628000
1	16638300	16638950
1	16641250	16644100
1	16650000	16651750
1	16653150	16653800
1	16658200	16664400
1	16673600	16680100
1	16692650	16695900
1	16711750	16713800
1	16722150	16723950
1	16767050	16768450
1	16832250	16833100
1	16838900	16841750
1	16885500	16887550
1	16926900	16941850
1	16944650	16945300
1	16947100	16948000
1	16948450	16952100
1	16970200	16972350
1	17052900	17053950
1	17199100	17199700
1	17209200	17210000
1	17213650	17216400
1	17218250	17220100
1	17221100	17224700
1	17224800	17225450
1	17226800	17227450
1	17228750	17234250
1	17240250	17241600
1	17273800	17277150
1	17286600	17288050
1	17352800	17357200
1	17379200	17380950
1	17424700	17425700
1	17558600	17561350
1	17618700	17620250
1	17624400	17625250
1	17703200	17704850
1	17754150	17755250
1	17763850	17769400
1	17843250	17844300
1	17846350	17847400
1	17857900	17859450
1	17866000	17867400
1	17885900	17886450
1	17890350	17892150
1	17908250	17909750
1	18230350	18231250
1	18384700	18386600
1	18460200	18461450
1	18490350	18494850
1	18516200	18517950
1	18527650	18529950
1	18617100	18617700
1	18624150	18626950
1	18646250	18647250
1	18681050	18681600
1	18691750	18693500
1	18742850	18745000
1	18789400	18792800
1	18806050	18808200
1	18840200	18840950
1	18861350	18863350
1	18880400	18882150
1	18882300	18883150
1	18925300	18926650
1	18992650	18996500
1	19228300	19231450
1	19248050	19249950
1	19270700	19272400
1	19288550	19289400
1	19320700	19321250
1	19323800	19326900
1	19335800	19339200
1	19348250	19349150
1	19391250	19395150
1	19399750	19400800
1	19405150	19407950
1	19412000	19415200
1	19482300	19484750
1	19504300	19507050
1	19515050	19517300
1	19525650	19526250
1	19529050	19531150
1	19534450	19538900
1	19545850	19546800
1	19577100	19579500
1	19595950	19596750
1	19611250	19612000
1	19637600	19639850
1	19680600	19681500
1	19746550	19747950
1	19750250	19758250
1	19758800	19761150
1	19762850	19764650
1	19771650	19773600
1	19776450	19778400
1	19778500	19779500
1	19783150	19783850
1	19784150	19786750
1	19795450	19796950
1	19810600	19814300
1	19830900	19832250
1	19840450	19842250
1	19874250	19874900
1	19917150	19919400
1	19922100	19928250
1	19928800	19929600
1	19932200	19935200
1	19938850	19943850
1	19945400	19947450
1	20029450	20031700
1	20061100	20063350
1	20064300	20065650
1	20080350	20082000
1	20096600	20097950
1	20100500	20101300
1	20101350	20104600
1	20108600	20110650
1	20113100	20114550
1	20124500	20128000
1	20141550	20142650
1	20145350	20146600
1	20204000	20205750
1	20208150	20209800
1	20215500	20216950
1	20306250	20309650
1	20313200	20315250
1	20347500	20349150
1	20356700	20360950
1	20462850	20464850
1	20466100	20467700
1	20498650	20499200
1	20506050	20507550
1	20512950	20514300
1	20576350	20578100
1	20651300	20653100
1	20666350	20669550
1	20682400	20684000
1	20684850	20686250
1	20833050	20835050
1	20939400	20941650
1	20959500	20960850
1	20986700	20989100
1	21006100	21007450
1	21023150	21024150
1	21093550	21094600
1	21102600	21103350
1	21110900	21115300
1	21213700	21214750
1	21222300	21224800
1	21244500	21245050
1	21290950	21292100
1	21308400	21310700
1	21333950	21335350
1	21343700	21352400
1	21353900	21355450
1	21357300	21360900
1	21376000	21377450
1	21389950	21391900
1	21409250	21411000
1	21473900	21480750
1	21488150	21493600
1	21493850	21494450
1	21497700	21498500
1	21498550	21499400
1	21500100	21503850
1	21577150	21580100
1	21593950	21595650
1	21596050	21597150
1	21601750	21603900
1	21650950	21651750
1	21655000	21659450
1	21664050	21666650
1	21671450	21672750
1	21766150	21766900
1	21770850	21772450
1	21948900	21953100
1	21957900	21963150
1	21964300	21966750
1	21999250	22000700
1	22002250	22003900
1	22015900	22016450
1	22021500	22022050
1	22086800	22088550
1	22090700	22092550
1	22102450	22103000
1	22107250	22111450
1	22113600	22116050
1	22282800	22284500
1	22284600	22285900
1	22351250	22353350
1	22369350	22370100
1	22378250	22381500
1	22389100	22390150
1	22393950	22398500
1	22398800	22399400
1	22400750	22403550
1	22404000	22404650
1	22531300	22532300
1	22583150	22587350
1	22627150	22628550
1	22674250	22675350
1	22738400	22741950
1	22777350	22780100
1	22798300	22800450
1	22812100	22814250
1	22833650	22836650
1	22844700	22845550
1	23007000	23007550
1	23076300	23078650
1	23100150	23101550
1	23151700	23155250
1	23295650	23296600
1	23344800	23348100
1	23366200	23367200
1	23409500	23411250
1	23440800	23443100
1	23452400	23453300
1	23474600	23477600
1	23485650	23486900
1	23493650	23495700
1	23500250	23501850
1	23604800	23605850
1	23610100	23610750
1	23667900	23672350
1	23693450	23697300
1	23702550	23705100
1	23709750	23710850
1	23729600	23731200
1	23777600	23779550
1	23800900	23802450
1	23804900	23806850
1	23810400	23811150
1	23853750	23859050
1	23872600	23875650
1	23880200	23890650
1	23904750	23905800
1	24017100	24020950
1	24030800	24032150
1	24044900	24046650
1	24052400	24056250
1	24061300	24061950
1	24068750	24072300
1	24103300	24114950
1	24115200	24121400
1	24121600	24129400
1	24136550	24137100
1	24150900	24152750
1	24156500	24157550
1	24194550	24195500
1	24245800	24248150
1	24282600	24288400
1	24290150	24292200
1	24293300	24293850
1	24305350	24307900
1	24309650	24312150
1	24317000	24318650
1	24344050	24346850
1	24445300	24447850
1	24454900	24456800
1	24487150	24488050
1	24528250	24529600
1	24609600	24611300
1	24615650	24617450
1	24620200	24622700
1	24638700	24639650
1	24645500	24646900
1	24671650	24672450
1	24710400	24712450
1	24715150	24717100
1	24717950	24719000
1	24739350	24746600
1	24801400	24804050
1	24827900	24830950
1	24834350	24835600
1	24841550	24843000
1	24866750	24868550
1	24893650	24895650
1	24924000	24925050
1	24965800	24972850
1	24983550	24984400
1	24999350	24999900
1	25008850	25009400
1	25031000	25033250
1	25070800	25073900
1	25095250	25098400
1	25120750	25122100
1	25179800	25180800
1	25190750	25191400
1	25338200	25339650
1	25357400	25361400
1	25407500	25408050
1	25523900	25526150
1	25538950	25540200
1	25557900	25560650
1	25564800	25568000
1	25572450	25575150
1	25578350	25581400
1	25596000	25597050
1	25664250	25666350
1	25756000	25758000
1	25783450	25787050
1	25788600	25790050
1	25803700	25806400
1	25810000	25811150
1	25826800	25828750
1	25869700	25870750
1	25891650	25896350
1	25915950	25917950
1	25936350	25937050
1	25960450	25961200
1	25984650	25986950
1	25987150	25989100
1	26007850	26009300
1	26019900	26022600
1	26023400	26024150
1	26069000	26071100
1	26092650	26093650
1	26099300	26101450
1	26105250	26107450
1	26122550	26123800
1	26135000	26137000
1	26144100	26148650
1	26152450	26154100
1	26163700	26164500
1	26184850	26186250
1	26192750	26195350
1	26197100	26200050
1	26216250	26217600
1	26230700	26233200
1	26322900	26325650
1	26405000	26408000
1	26409750	26411750
1	26418850	26421050
1	26423650	26424700
1	26436700	26439600
1	26440450	26442050
1	26447450	26449600
1	26451950	26454150
1	26495950	26497300
1	26503150	26504750
1	26560150	26562500
1	26563800	26564900
1	26592500	26593850
1	26601750	26603350
1	26604750	26607250
1	26624800	26625350
1	26632000	26634100
1	26662600	26664050
1	26716950	26718350
1	26757450	26760450
1	26766600	26767800
1	26798000	26800850
1	26813000	26814450
1	26826350	26828850
1	26855450	26860250
1	26878550	26880550
1	26891100	26891800
1	26945950	26948950
1	27003300	27004500
1	27017100	27035050
1	27038950	27039900
1	27043150	27046400
1	27049100	27051150
1	27051400	27052200
1	27052500	27056550
1	27057400	27058400
1	27065700	27067300
1	27070400	27071350
1	27079000	27080300
1	27081050	27081600
1	27093200	27096450
1	27108750	27110800
1	27111650	27116100
1	27125050	27127800
1	27150400	27153450
1	27190500	27192900
1	27193550	27195400
1	27215650	27217750
1	27225400	27228250
1	27246850	27249900
1	27275550	27276400
1	27285850	27288050
1	27316600	27317950
1	27333650	27337650
1	27353500	27355150
1	27438050	27438900
1	27440600	27444150
1	27447450	27450300
1	27463800	27464550
1	27466600	27472800
1	27474850	27483300
1	27487300	27489300
1	27489350	27490450
1	27560900	27562300
1	27563400	27564450
1	27604550	27605500
1	27609850	27610400
1	27645800	27646850
1	27647400	27650450
1	27651900	27654700
1	27667800	27670200
1	27674800	27677400
1	27691400	27694500
1	27724900	27726250
1	27727900	27728550
1	27762400	27764100
1	27764650	27765900
1	27781850	27782700
1	27795100	27796800
1	27813950	27817950
1	27834800	27835400
1	27866000	27873050
1	27879550	27883000
1	27883250	27884200
1	27886000	27887750
1	27889450	27892300
1	27894150	27898800
1	27927550	27931050
1	27977450	27978150
1	27997950	28000150
1	28010350	28011150
1	28048050	28049400
1	28051100	28053800
1	28081050	28083850
1	28098450	28101800
1	28110650	28113100
1	28113900	28117950
1	28146100	28146650
1	28155950	28158650
1	28159450	28160000
1	28190500	28191650
1	28240100	28241900
1	28260750	28262600
1	28285600	28287450
1	28294250	28296250
1	28297850	28299550
1	28348800	28349800
1	28363200	28365450
1	28382200	28386550
1	28393000	28395000
1	28397450	28403050
1	28404000	28406050
1	28411850	28412400
1	28412900	28416200
1	28416850	28418300
1	28478950	28480800
1	28496100	28497500
1	28498800	28499850
1	28558400	28560600
1	28561450	28564300
1	28570100	28570750
1	28571250	28571800
1	28571950	28578200
1	28584500	28587600
1	28622650	28624250
1	28632900	28633500
1	28639350	28641650
1	28654300	28657250
1	28672050	28673250
1	28691650	28693400
1	28695150	28698000
1	28700000	28701850
1	28742450	28745400
1	28754450	28756600
1	28760650	28761800
1	28761850	28766800
1	28784050	28784650
1	28831000	28840900
1	28841150	28842650
1	28842800	28847900
1	28849600	28850500
1	28850550	28855200
1	28877650	28880650
1	28903450	28906100
1	28906400	28909350
1	28966500	28967500
1	28968000	28971650
1	28972100	28976750
1	28992650	28997300
1	29001850	29002500
1	29059700	29061600
1	29062350	29067550
1	29071650	29076600
1	29077850	29078450
1	29101450	29102350
1	29106350	29107500
1	29208650	29209300
1	29210550	29214300
1	29239750	29243250
1	29246900	29249650
1	29252400	29256000
1	29275400	29278200
1	29282000	29283800
1	29300550	29301200
1	29309600	29311300
1	29344600	29345450
1	29359700	29360450
1	29417450	29418000
1	29431450	29434500
1	29462450	29463900
1	29482150	29483950
1	29487950	29488950
1	29497050	29497600
1	29505550	29510650
1	29528200	29529800
1	29553300	29555200
1	29556450	29557700
1	29562750	29563750
1	29565100	29566000
1	29656500	29657600
1	29676000	29676850
1	29829250	29833700
1	30155000	30156350
1	30309700	30310300
1	30323000	30325750
1	30457250	30458950
1	30713650	30714500
1	30714850	30715400
1	30891500	30892050
1	30933400	30936100
1	30961950	30962500
1	30974900	30975950
1	30994650	30996450
1	30998150	30999900
1	31136400	31138500
1	31140550	31142000
1	31146600	31151100
1	31153750	31155850
1	31160850	31161700
1	31167400	31169300
1	31177000	31178450
1	31178950	31180100
1	31190450	31191050
1	31191100	31192650
1	31270950	31272550
1	31295450	31298100
1	31307400	31308500
1	31373750	31375750
1	31390200	31392900
1	31395050	31397150
1	31401300	31401850
1	31404050	31404800
1	31435750	31436800
1	31447050	31451200
1	31455050	31459900
1	31460850	31462150
1	31464200	31465250
1	31471600	31472500
1	31472650	31473600
1	31474000	31476300
1	31484500	31487700
1	31489350	31490000
1	31490450	31491100
1	31492050	31494650
1	31494950	31496000
1	31496050	31502650
1	31503000	31505600
1	31511950	31514650
1	31515200	31517350
1	31519850	31520650
1	31522800	31524050
1	31527150	31530600
1	31533950	31539900
1	31575150	31576150
1	31618450	31619500
1	31626550	31629000
1	31635000	31636050
1	31642300	31646650
1	31701150	31702850
1	31730500	31732250
1	31734100	31735550
1	31735850	31737400
1	31749500	31751100
1	31751150	31751700
1	31766850	31770800
1	31779800	31782350
1	31826600	31827750
1	31837200	31838450
1	31847000	31848100
1	31853950	31855300
1	31862200	31864150
1	31866900	31868450
1	31885350	31890200
1	31893950	31896400
1	31904150	31905550
1	31921450	31923800
1	31925900	31928050
1	31939400	31951900
1	31954400	31957100
1	31957900	31958900
1	31959750	31960900
1	31966200	31967250
1	31970350	31971900
1	31974550	31978950
1	31980000	31981450
1	31995700	31998400
1	32013950	32016500
1	32049000	32051100
1	32109100	32112000
1	32134600	32136800
1	32153750	32154850
1	32165900	32167400
1	32169400	32171650
1	32232950	32233950
1	32235100	32236400
1	32252850	32255300
1	32295850	32296500
1	32320400	32322150
1	32340750	32341900
1	32346500	32347800
1	32362600	32364200
1	32375700	32378700
1	32394100	32394650
1	32395550	32399350
1	32399550	32405050
1	32477950	32481700
1	32484200	32487450
1	32488900	32489500
1	32526550	32527200
1	32531550	32532550
1	32536700	32539400
1	32568950	32570650
1	32572500	32576100
1	32576600	32579200
1	32581700	32582300
1	32589800	32591250
1	32592650	32593250
1	32603550	32605750
1	32606050	32606950
1	32607300	32610450
1	32642850	32647150
1	32649500	32651200
1	32663350	32667100
1	32670350	32672300
1	32673700	32675650
1	32681100	32682500
1	32686000	32691200
1	32730850	32731700
1	32753850	32759150
1	32765300	32767150
1	32772700	32773300
1	32773400	32778100
1	32779650	32783050
1	32784950	32789050
1	32797200	32802150
1	32815900	32818700
1	32858400	32862050
1	32870850	32874800
1	32940100	32940700
1	32961300	32962950
1	32965250	32969250
1	33003850	33006200
1	33035000	33038100
1	33077050	33078950
1	33091350	33093200
1	33114400	33119300
1	33120700	33121450
1	33141350	33143450
1	33146650	33147650
1	33149600	33150700
1	33160250	33161650
1	33171300	33173250
1	33180700	33183450
1	33196550	33197600
1	33201850	33204100
1	33206200	33212750
1	33216450	33234350
1	33234550	33235650
1	33236800	33237700
1	33237750	33239600
1	33240450	33241750
1	33254200	33255850
1	33257400	33258100
1	33280200	33286300
1	33366650	33367900
1	33369550	33370850
1	33398950	33400650
1	33413950	33416100
1	33429150	33431450
1	33438250	33439250
1	33445650	33448950
1	33454200	33455900
1	33473150	33481950
1	33489700	33494550
1	33494600	33495350
1	33500200	33503550
1	33520300	33521800
1	33545850	33547000
1	33591600	33594050
1	33613250	33617600
1	33646500	33647550
1	33705650	33706300
1	33720200	33724100
1	33752750	33753400
1	33792450	33795000
1	33803600	33804650
1	33806800	33809950
1	33810450	33811000
1	33811950	33817450
1	33825000	33826050
1	33841400	33844450
1	33850900	33851450
1	33865600	33866350
1	33875150	33877000
1	33878850	33880950
1	33885900	33888500
1	33889100	33891100
1	33895700	33897900
1	33925100	33926350
1	33935500	33939150
1	33947350	33949000
1	33977100	33979650
1	34029200	34030200
1	34105400	34105950
1	34123950	34127100
1	34152500	34153650
1	34162400	34162950
1	34177000	34177600
1	34342450	34343000
1	34368750	34369300
1	34451450	34452650
1	34485650	34486550
1	34712600	34713700
1	34871700	34873300
1	34890800	34892150
1	35315200	35319550
1	35323900	35326400
1	35331200	35332450
1	35436050	35437350
1	35450000	35451400
1	35459400	35460250
1	35475900	35477350
1	35489750	35490300
1	35495800	35498600
1	35544050	35546400
1	35645950	35646550
1	35651200	35652550
1	35653800	35654650
1	35654900	35660300
1	35667550	35668300
1	35726900	35728200
1	35728950	35731850
1	35733250	35735400
1	35753200	35755200
1	35785300	35786350
1	35788650	35793950
1	35829150	35831350
1	35840100	35841400
1	35904200	35906750
1	35913400	35915050
1	35916750	35919450
1	35941350	35942500
1	35964650	35966700
1	35970050	35974350
1	35978800	35980750
1	35989400	35990550
1	36004350	36006550
1	36018450	36021100
1	36021450	36024100
1	36026200	36027200
1	36040000	36041750
1	36082700	36084250
1	36101100	36104700
1	36105350	36109050
1	36181250	36181900
1	36183150	36185400
1	36234200	36236050
1	36272950	36276700
1	36320000	36322150
1	36322600	36323150
1	36330300	36331150
1	36390850	36391800
1	36394950	36398500
1	36419750	36420650
1	36424300	36424900
1	36487750	36490550
1	36493200	36494100
1	36553900	36556400
1	36601950	36603000
1	36613950	36617950
1	36620400	36623400
1	36624550	36631550
1	36640650	36641650
1	36652950	36654300
1	36664500	36667450
1	36668750	36670700
1	36672100	36674400
1	36687800	36694800
1	36695050	36708950
1	36709100	36740300
1	36743100	36752000
1	36760200	36767400
1	36771350	36772800
1	36794300	36795100
1	36825000	36826700
1	36833250	36834150
1	36838150	36842250
1	36842850	36844300
1	36845450	36846700
1	36849250	36854450
1	36861900	36864550
1	36884650	36885700
1	36897550	36899500
1	36901800	36903050
1	36915050	36917700
1	36923100	36923900
1	36928500	36931700
1	36942150	36942950
1	36951550	36953700
1	37107100	37107650
1	37216500	37218250
1	37231900	37232550
1	37914550	37915700
1	37920850	37921650
1	37924100	37924750
1	37925650	37955400
1	37959700	37969450
1	37971550	37975600
1	37978150	37981650
1	37998600	38005000
1	38015250	38015900
1	38018600	38020450
1	38026450	38027400
1	38028500	38031350
1	38059900	38062850
1	38070750	38072550
1	38148750	38150550
1	38154450	38159100
1	38204150	38205900
1	38245400	38246650
1	38259250	38260150
1	38272250	38275750
1	38275850	38278150
1	38282250	38284500
1	38297400	38298400
1	38313950	38317350
1	38323900	38326700
1	38327100	38329400
1	38356150	38356800
1	38390800	38392650
1	38396600	38398400
1	38403950	38407400
1	38440250	38440800
1	38453900	38456900
1	38476800	38480150
1	38480900	38482700
1	38518950	38519500
1	38604200	38605250
1	38659500	38661700
1	38992350	38994150
1	39036700	39038300
1	39179000	39179600
1	39189300	39192450
1	39211000	39211550
1	39322650	39326900
1	39327450	39331750
1	39338050	39340700
1	39406650	39408200
1	39415050	39418150
1	39418950	39419750
1	39450950	39453650
1	39455350	39458900
1	39459650	39460450
1	39462100	39464300
1	39464400	39465050
1	39481350	39483050
1	39484850	39486050
1	39490700	39493850
1	39530500	39532150
1	39541750	39543200
1	39568550	39569400
1	39570500	39572850
1	39580500	39584800
1	39589650	39590800
1	39592300	39596550
1	39597950	39600500
1	39600700	39601300
1	39607400	39609550
1	39615950	39616900
1	39618400	39618950
1	39619850	39621500
1	39623300	39625450
1	39635650	39636200
1	39636300	39637200
1	39644050	39645350
1	39648650	39650400
1	39657200	39658700
1	39679300	39680650
1	39695800	39697600
1	39714050	39715400
1	39733100	39735050
1	39757850	39759100
1	39764800	39765850
1	39770500	39772100
1	39809800	39811200
1	39813150	39815750
1	39823300	39825750
1	39831750	39833950
1	39849450	39850950
1	39852300	39853600
1	39856900	39859000
1	39859200	39863000
1	39872150	39875500
1	39890800	39892150
1	39924950	39925900
1	39992550	39993300
1	40006850	40007400
1	40009100	40011150
1	40024450	40026250
1	40039600	40043000
1	40053200	40054050
1	40118300	40120600
1	40187100	40187850
1	40196150	40197200
1	40203750	40205750
1	40216200	40216750
1	40261800	40263150
1	40265250	40266250
1	40274400	40275150
1	40279550	40281350
1	40290600	40293400
1	40295050	40295600
1	40301550	40302650
1	40307550	40308950
1	40315700	40320300
1	40323500	40327000
1	40336250	40339600
1	40340600	40346050
1	40347300	40350150
1	40357650	40359300
1	40364550	40365400
1	40366650	40368400
1	40421100	40422000
1	40425450	40428000
1	40453150	40455350
1	40466950	40467850
1	40488750	40491550
1	40494750	40497200
1	40501050	40503350
1	40504400	40507950
1	40511400	40512650
1	40523100	40526500
1	40534850	40537900
1	40561850	40563650
1	40572400	40574600
1	40605050	40607650
1	40625900	40628800
1	40630700	40631350
1	40653050	40653700
1	40655900	40656450
1	40664150	40665800
1	40720950	40725600
1	40731400	40735750
1	40743050	40750700
1	40767250	40768350
1	40771050	40772950
1	40838400	40842350
1	40844700	40852850
1	40855050	40858850
1	40861850	40862800
1	40869650	40870700
1	40876050	40877850
1	40914550	40916800
1	40974100	40974700
1	40996000	40998350
1	41057100	41058350
1	41116100	41118200
1	41156350	41160650
1	41160950	41164400
1	41169050	41171800
1	41174600	41179700
1	41180900	41182400
1	41187800	41189550
1	41201650	41202350
1	41204650	41206950
1	41210500	41211300
1	41214450	41217150
1	41265000	41265700
1	41327650	41329900
1	41332700	41335300
1	41346450	41347650
1	41351200	41351900
1	41365050	41365700
1	41380700	41381900
1	41385150	41385700
1	41387950	41389600
1	41395700	41396350
1	41409550	41411350
1	41432550	41434750
1	41444400	41449850
1	41464250	41465300
1	41468550	41469900
1	41507000	41507900
1	41509100	41514050
1	41516100	41517750
1	41567050	41568850
1	41573700	41576450
1	41584050	41585250
1	41588650	41589900
1	41617350	41620100
1	41620300	41621100
1	41680700	41683150
1	41697400	41698650
1	41702800	41709000
1	41710650	41712950
1	41784300	41785700
1	41807350	41808650
1	41818950	41820200
1	41825200	41827650
1	41831000	41832500
1	41834250	41835800
1	41836150	41838800
1	41852900	41854000
1	41897650	41899000
1	41901900	41903000
1	41907850	41909400
1	41914400	41916950
1	41927450	41928000
1	41947800	41949550
1	41949650	41951450
1	41961100	41963150
1	41963800	41967800
1	41979600	41982200
1	42011550	42013150
1	42083000	42084600
1	42132200	42133900
1	42154350	42155200
1	42160650	42161650
1	42237850	42240000
1	42242250	42243150
1	42246200	42247200
1	42249900	42250950
1	42254350	42256900
1	42268150	42269700
1	42288500	42289350
1	42325250	42328000
1	42328250	42328850
1	42331350	42333000
1	42346750	42348900
1	42356050	42357450
1	42392050	42394000
1	42446550	42447200
1	42500250	42501900
1	42546650	42547450
1	42550800	42551500
1	42617250	42618000
1	42638250	42641050
1	42642350	42644050
1	42663350	42665000
1	42677700	42681850
1	42683800	42684350
1	42690050	42694950
1	42695350	42696050
1	42711550	42712350
1	42724500	42726100
1	42729150	42733050
1	42776700	42781000
1	42784300	42789150
1	42794550	42795200
1	42798200	42808800
1	42846350	42847150
1	42858850	42859400
1	42859500	42860300
1	42886250	42886950
1	42920900	42923500
1	42927050	42930050
1	42994850	42996250
1	43041950	43043600
1	43122150	43126000
1	43139300	43141150
1	43146150	43150100
1	43151700	43153200
1	43153650	43156050
1	43156500	43160750
1	43202100	43203850
1	43232450	43234400
1	43281550	43283550
1	43288150	43289300
1	43305950	43307650
1	43311950	43312800
1	43317750	43320150
1	43379600	43380800
1	43388700	43392050
1	43396500	43400150
1	43403100	43416450
1	43423450	43425700
1	43426500	43428400
1	43432050	43433600
1	43435000	43439800
1	43461500	43463350
1	43477950	43479200
1	43504800	43505750
1	43522400	43523200
1	43585800	43587050
1	43612550	43613700
1	43617900	43619500
1	43636750	43638650
1	43700250	43702600
1	43706500	43707550
1	43711850	43713600
1	43721050	43723850
1	43729050	43732500
1	43734350	43737750
1	43750150	43752000
1	43759450	43761250
1	43813400	43818550
1	43822750	43826500
1	43828950	43829500
1	43831200	43835250
1	43854300	43856900
1	43860300	43863450
1	43919750	43921900
1	43923700	43924400
1	43924500	43925050
1	43957500	43960100
1	43994950	43995700
1	43995800	43998650
1	43998800	43999700
1	43999750	44004500
1	44005050	44019750
1	44036550	44038700
1	44108250	44108950
1	44113050	44118150
1	44168850	44171100
1	44171200	44175050
1	44181300	44182700
1	44206400	44207650
1	44222400	44224400
1	44248850	44250150
1	44287100	44288550
1	44295450	44297800
1	44303800	44304750
1	44312700	44313750
1	44323350	44325000
1	44340250	44340850
1	44400200	44403150
1	44410250	44413500
1	44435450	44436350
1	44438600	44442200
1	44444950	44445900
1	44455750	44458600
1	44471500	44472050
1	44495100	44498850
1	44619150	44620650
1	44678050	44679750
1	44747950	44750700
1	44758750	44760600
1	44792300	44795150
1	44799750	44801150
1	44809800	44812650
1	44820000	44821300
1	44878750	44880850
1	44888900	44890300
1	44997950	44998500
1	45071750	45073050
1	45096450	45099000
1	45125550	45126750
1	45138500	45143450
1	45153900	45155800
1	45166050	45167600
1	45173250	45174700
1	45180250	45181050
1	45186400	45188700
1	45195000	45197650
1	45198250	45199950
1	45204300	45206500
1	45239500	45244350
1	45244500	45245050
1	45246550	45247950
1	45248000	45250500
1	45263550	45266850
1	45271000	45277150
1	45278950	45281350
1	45284250	45286500
1	45365000	45365650
1	45373450	45374400
1	45412300	45413900
1	45427750	45429400
1	45446000	45446600
1	45450750	45453100
1	45475650	45479150
1	45484050	45484650
1	45502850	45503650
1	45606550	45607400
1	45637200	45638750
1	45653450	45655300
1	45671450	45672650
1	45711700	45713400
1	45731300	45733050
1	45768350	45771000
1	45779150	45781600
1	45803750	45807950
1	45812350	45817100
1	45825200	45828100
1	45829950	45830700
1	45838800	45840350
1	45848150	45850100
1	45852550	45854950
1	45858100	45859150
1	45867450	45870800
1	45876000	45877800
1	45878650	45879500
1	45907600	45913950
1	45919350	45920100
1	45924300	45925000
1	45956250	45958200
1	45964900	45968600
1	45974500	45975950
1	45978450	45979300
1	45984400	45985350
1	45986100	45988700
1	45990000	45993100
1	46015200	46018550
1	46021500	46025500
1	46031700	46036100
1	46048400	46051850
1	46054400	46058000
1	46061650	46062650
1	46084000	46086850
1	46100900	46101750
1	46106100	46106700
1	46108500	46112300
1	46143900	46148450
1	46150000	46155650
1	46195450	46197450
1	46215150	46217950
1	46267600	46270800
1	46274950	46276100
1	46292100	46293900
1	46299600	46301650
1	46305500	46307350
1	46320150	46323000
1	46329000	46332150
1	46334650	46335400
1	46336400	46339800
1	46349350	46351600
1	46351950	46352800
1	46356700	46360100
1	46360600	46361450
1	46403550	46404150
1	46418050	46421400
1	46435200	46436250
1	46437000	46440650
1	46441500	46447550
1	46447650	46448700
1	46474950	46476550
1	46486200	46487350
1	46501900	46502700
1	46503750	46507900
1	46512000	46512900
1	46513200	46515000
1	46527850	46529900
1	46530450	46531950
1	46537500	46538100
1	46543250	46543800
1	46550200	46550900
1	46562050	46562800
1	46564550	46565200
1	46575700	46581850
1	46582950	46583800
1	46584500	46585600
1	46588350	46589200
1	46593050	46595750
1	46595850	46602500
1	46636250	46641250
1	46644600	46645350
1	46645950	46652000
1	46653600	46655650
1	46663000	46665550
1	46710550	46711300
1	46712000	46714650
1	46743750	46745700
1	46762700	46771750
1	46773800	46775000
1	46804650	46807850
1	46810750	46814550
1	46828950	46831150
1	46859300	46863650
1	46866550	46868950
1	46909250	46911400
1	46981700	46984100
1	46986950	46989150
1	47068950	47071000
1	47081800	47083250
1	47103850	47106250
1	47107550	47111650
1	47117350	47120200
1	47132550	47135150
1	47145800	47149200
1	47152000	47154800
1	47155150	47156200
1	47157900	47159950
1	47169150	47170200
1	47170300	47171300
1	47180600	47181200
1	47183450	47186850
1	47221250	47225450
1	47232700	47234400
1	47254100	47254650
1	47263700	47264850
1	47271900	47272950
1	47296100	47297000
1	47368300	47370400
1	47373400	47374400
1	47477850	47480600
1	47494950	47498650
1	47512000	47514250
1	47517600	47518650
1	47523600	47526850
1	47644750	47645800
1	47728550	47729150
1	47730500	47734150
1	47777150	47781500
1	47787500	47791400
1	47794050	47795250
1	47797600	47802300
1	47813650	47814650
1	47836900	47837500
1	47845600	47847350
1	47902700	47904000
1	47942700	47944350
1	48023500	48026250
1	48035050	48035850
1	48162400	48163100
1	48228600	48230200
1	48246150	48247850
1	48274850	48276000
1	48340600	48342500
1	48391850	48393650
1	48406950	48408150
1	48428400	48430500
1	48436600	48437400
1	48472350	48472950
1	48491750	48492750
1	48545750	48547150
1	48679850	48681500
1	48711400	48713500
1	48716300	48717700
1	48767550	48769500
1	48857000	48858300
1	48861200	48862700
1	48870550	48871950
1	48899200	48899750
1	48908450	48909900
1	48934950	48936800
1	48937850	48938850
1	48957450	48958450
1	48959300	48961150
1	48990900	48993250
1	49018300	49019750
1	49065500	49066100
1	49084500	49085750
1	49127300	49128750
1	49145750	49146650
1	49206650	49208150
1	49208850	49210800
1	49255100	49256000
1	49301600	49302750
1	49342850	49345900
1	49381200	49382550
1	49382950	49384400
1	49402250	49404300
1	49438750	49439900
1	49483300	49484000
1	49490000	49493300
1	49570150	49571300
1	49605300	49606750
1	49634600	49635700
1	49654750	49657000
1	49662250	49663600
[truncated: 69,080 more rows]

## Sheet: Supplementary Table 9b
Supplementary Table 9b. List of H3k27ac ChIP-seq peak regions in PC3 cell line
Chromosomes	Start	End
1	10003	10439
1	13360	13948
1	14014	14943
1	28708	29872
1	459033	459397
1	460041	460352
1	523664	524016
1	564923	565402
1	566209	566710
1	567290	567938
1	569286	569785
1	713492	715464
1	762297	763600
1	793427	794686
1	859458	859880
1	868778	869095
1	875865	876478
1	894048	894621
1	895985	896632
1	901214	902504
1	911344	912028
1	934913	935395
1	935505	936310
1	940402	940903
1	940961	942046
1	948096	950523
1	955558	957218
1	959240	960040
1	960269	961241
1	975360	976173
1	983976	984402
1	984714	985035
1	993161	993850
1	993945	994943
1	1002774	1004190
1	1004838	1005162
1	1008537	1010038
1	1014503	1015791
1	1044695	1045944
1	1050744	1051590
1	1051819	1052288
1	1059867	1060942
1	1063834	1064440
1	1067550	1067888
1	1068149	1068947
1	1072448	1072924
1	1077157	1077658
1	1077955	1080594
1	1084898	1086497
1	1093009	1094888
1	1098428	1098825
1	1100720	1101283
1	1143680	1144272
1	1152987	1153483
1	1166438	1167404
1	1167790	1168267
1	1172413	1174017
1	1179483	1179919
1	1185330	1185718
1	1208294	1209293
1	1242747	1243184
1	1243381	1243886
1	1244022	1245322
1	1245532	1245898
1	1253877	1254238
1	1259656	1261320
1	1279663	1280142
1	1280424	1281519
1	1283188	1284409
1	1309980	1310698
1	1310925	1311435
1	1333898	1334733
1	1334920	1335586
1	1342062	1343464
1	1361466	1362219
1	1365850	1368538
1	1368810	1369987
1	1397109	1397881
1	1406448	1407941
1	1440437	1441472
1	1446571	1448187
1	1509343	1510743
1	1550647	1551761
1	1562718	1563310
1	1573542	1574491
1	1589892	1591432
1	1609686	1611048
1	1617705	1618534
1	1623532	1625263
1	1636713	1637133
1	1637383	1638051
1	1655261	1656684
1	1676742	1678542
1	1689450	1691324
1	1709381	1709891
1	1709945	1710997
1	1713526	1714635
1	1760507	1761194
1	1789941	1791268
1	1821389	1823151
1	1838395	1838765
1	1840021	1840560
1	1850251	1850792
1	1932983	1933483
1	1981081	1981628
1	1981795	1982510
1	2023380	2024458
1	2042463	2042777
1	2069192	2069651
1	2083044	2083355
1	2121203	2122024
1	2125142	2125661
1	2125793	2127377
1	2136825	2137311
1	2143740	2145163
1	2158364	2159218
1	2165614	2166585
1	2171395	2171710
1	2171837	2172250
1	2179335	2180058
1	2186779	2188069
1	2206670	2208580
1	2221287	2221598
1	2221662	2222130
1	2222422	2223137
1	2245799	2246730
1	2322515	2323022
1	2323115	2324026
1	2343612	2343969
1	2344183	2345435
1	2347331	2348493
1	2431634	2431986
1	2457138	2458167
1	2477858	2478403
1	2478708	2479300
1	2479617	2480912
1	2487139	2488996
1	2507476	2508263
1	2508998	2510556
1	2516700	2517955
1	2518336	2518975
1	2524234	2525475
1	2562594	2563573
1	2574029	2574766
1	2721256	2722724
1	2722844	2723813
1	2842515	2842838
1	2843385	2843759
1	2883678	2885130
1	2885195	2886787
1	2921084	2921690
1	2922126	2922765
1	3021647	3022136
1	3022295	3023403
1	3050525	3050836
1	3087445	3087796
1	3209265	3210583
1	3223533	3224001
1	3229313	3230840
1	3236762	3237214
1	3237365	3237757
1	3238869	3240640
1	3370271	3370903
1	3370991	3372244
1	3374606	3374917
1	3376266	3376723
1	3376993	3377573
1	3387048	3388871
1	3397072	3397475
1	3398152	3399636
1	3411510	3411821
1	3447342	3447944
1	3448230	3448541
1	3490247	3490715
1	3503687	3504686
1	3504875	3505315
1	3529179	3530986
1	3541535	3542633
1	3547873	3549304
1	3566098	3566613
1	3568423	3568836
1	3569045	3569358
1	3712402	3713064
1	3773186	3774762
1	3785836	3786516
1	3816254	3817939
1	5447135	5447465
1	5448603	5448978
1	5449373	5449714
1	5460193	5460580
1	5464072	5464853
1	5465175	5466036
1	5897747	5898058
1	6051620	6052589
1	6085436	6086292
1	6086456	6086776
1	6187239	6187764
1	6217244	6217938
1	6218076	6218660
1	6230955	6231297
1	6258856	6259711
1	6259931	6260264
1	6265491	6266876
1	6279955	6281135
1	6295298	6296071
1	6296198	6296535
1	6320271	6320926
1	6329514	6330836
1	6403997	6404517
1	6413703	6414430
1	6445333	6446731
1	6453042	6454433
1	6510256	6510588
1	6511378	6511715
1	6531537	6532751
1	6545280	6545696
1	6549365	6550027
1	6550145	6551482
1	6613798	6614680
1	6637752	6638141
1	6640040	6640516
1	6661433	6662087
1	6662320	6662866
1	6663087	6664482
1	6672772	6673538
1	6673834	6675502
1	6685034	6685864
1	6761293	6761888
1	6844124	6845140
1	6867729	6868391
1	7325017	7326825
1	7513756	7514067
1	7530685	7531549
1	7549822	7550227
1	7550347	7552874
1	7608719	7611190
1	7611304	7612500
1	7705155	7706027
1	7738371	7740347
1	7831094	7832081
1	7843218	7843845
1	7844298	7844764
1	7946167	7946704
1	8013822	8014789
1	8021027	8022326
1	8042442	8042879
1	8064907	8066152
1	8080435	8081113
1	8085748	8086247
1	8086501	8088513
1	8100235	8100776
1	8100984	8101585
1	8106391	8108743
1	8121209	8123020
1	8130093	8131607
1	8135950	8138904
1	8143462	8144840
1	8154909	8157537
1	8157791	8158789
1	8179944	8183029
1	8197384	8198565
1	8203153	8203535
1	8214113	8216253
1	8229223	8230737
1	8235083	8235554
1	8241014	8242425
1	8242707	8243759
1	8253893	8254700
1	8254824	8255841
1	8261545	8262328
1	8262563	8263216
1	8263968	8264478
1	8264824	8265297
1	8271203	8273083
1	8276953	8277968
1	8297713	8299920
1	8307494	8308487
1	8318164	8320366
1	8353108	8353485
1	8373828	8374429
1	8403154	8404352
1	8467788	8469591
1	8483197	8485181
1	8498663	8499513
1	8509139	8509811
1	8522886	8524322
1	8585383	8586092
1	8631282	8632574
1	8703983	8704312
1	8740841	8741517
1	8741791	8742351
1	8746714	8747988
1	8761360	8763513
1	8771430	8773913
1	8802399	8802710
1	8857687	8858089
1	8876872	8878520
1	8883075	8883944
1	8907689	8908870
1	8938128	8940218
1	8950123	8950538
1	8999454	8999838
1	9001557	9001983
1	9061366	9062972
1	9188394	9190026
1	9222294	9224130
1	9224389	9224795
1	9241619	9242846
1	9294743	9295639
1	9304438	9305340
1	9339591	9340001
1	9352168	9353964
1	9359752	9361431
1	9377730	9378155
1	9433969	9434371
1	9459975	9461155
1	9472305	9474302
1	9488532	9489018
1	9489156	9489533
1	9599552	9600268
1	9648872	9649817
1	9731102	9731647
1	9731727	9732042
1	9874874	9875352
1	9883325	9884768
1	9885125	9886174
1	9895993	9896944
1	9902865	9904110
1	9937715	9938640
1	9952872	9953875
1	9970662	9971329
1	10002655	10003922
1	10092900	10093830
1	10269755	10270416
1	10270630	10271838
1	10317650	10318293
1	10323037	10324429
1	10434560	10434871
1	10447369	10448828
1	10458906	10459954
1	10474793	10476350
1	10490319	10491246
1	10518925	10520243
1	10532023	10532552
1	10534919	10535602
1	10570170	10571125
1	10588676	10589217
1	10658983	10659356
1	10711772	10712563
1	10726246	10726811
1	10739975	10741379
1	10745744	10748000
1	10753592	10754508
1	10754998	10755530
1	10764263	10764658
1	10774450	10774790
1	10774956	10775310
1	10783853	10784279
1	10784346	10784905
1	10797810	10799127
1	10799218	10799802
1	10819650	10820762
1	10821055	10822548
1	10838637	10840611
1	10853357	10854105
1	10854838	10855241
1	10855939	10856686
1	10864030	10864971
1	10960073	10962044
1	11035966	11036337
1	11072314	11073385
1	11119070	11120001
1	11120254	11120876
1	11159331	11159969
1	11322059	11322705
1	11322894	11323205
1	11333172	11334122
1	11538836	11539232
1	11740652	11741525
1	11790587	11791181
1	11796205	11797141
1	11847447	11848430
1	11865060	11866083
1	11866144	11866790
1	11967888	11968314
1	11968533	11969767
1	11969926	11970257
1	11985724	11986296
1	11988281	11988749
1	11994288	11995196
1	12020746	12021983
1	12040130	12040989
1	12061238	12061704
1	12079490	12080265
1	12220386	12220718
1	12221601	12222075
1	12290050	12290665
1	12406500	12407546
1	12415863	12416249
1	12416323	12416914
1	12440213	12441995
1	12445631	12446346
1	12446425	12447090
1	12466937	12467528
1	12467594	12468086
1	12493782	12494093
1	12508505	12508816
1	12508951	12509326
1	12535103	12535805
1	12535954	12536626
1	12538600	12539522
1	12541082	12541596
1	12545927	12546270
1	12587925	12589593
1	12589663	12590208
1	12599705	12601103
1	12608765	12610392
1	12634169	12634788
1	12647680	12649061
1	12654739	12656917
1	12663514	12664461
1	12664578	12665169
1	12676212	12679208
1	14075203	14076707
1	14084483	14084876
1	14085088	14086626
1	14381711	14382069
1	14382364	14383230
1	15273799	15274275
1	15415522	15415895
1	15416132	15417536
1	15479073	15480036
1	15480194	15480744
1	15499722	15500716
1	15505516	15505852
1	15514325	15514819
1	15515914	15516360
1	15516501	15516818
1	15526693	15527089
1	15527270	15529097
1	15544437	15544958
1	15545327	15545692
1	15573764	15574355
1	15611695	15612204
1	15668219	15668984
1	15671952	15673165
1	15677878	15679156
1	15679246	15679665
1	15736126	15737569
1	15737861	15738575
1	15742766	15744065
1	15744211	15744568
1	15744893	15745423
1	15745474	15746094
1	15750378	15750710
1	15750897	15751612
1	15753581	15754270
1	15850269	15850716
1	15851059	15851384
1	15851748	15852059
1	15853272	15854054
1	15885311	15886903
1	15910842	15911718
1	15929501	15930645
1	15943051	15943713
1	15943944	15945324
1	16010227	16010885
1	16011026	16011707
1	16082691	16083756
1	16090830	16091460
1	16107257	16107889
1	16121129	16121617
1	16122049	16122754
1	16125835	16127863
1	16160874	16162329
1	16162597	16162974
1	16173688	16174019
1	16174295	16175928
1	16175982	16176886
1	16212253	16213670
1	16278952	16279887
1	16302008	16302713
1	16399694	16400165
1	16414358	16415770
1	16447859	16448766
1	16465507	16466098
1	16466424	16466931
1	16470739	16471803
1	16471936	16473410
1	16479273	16479709
1	16481322	16482549
1	16488395	16489102
1	16493815	16494526
1	16499235	16500163
1	16500515	16500948
1	16502040	16502655
1	16507806	16509692
1	16509996	16510432
1	16514848	16516346
1	16533200	16534156
1	16538651	16539170
1	16543461	16543788
1	16562827	16564266
1	16574594	16575543
1	16660730	16661650
1	16661969	16662280
1	16678315	16679562
1	16693601	16694565
1	16766875	16768006
1	16825115	16826131
1	16839427	16840499
1	16840631	16841401
1	16860639	16861639
1	16871768	16872294
1	16939414	16940535
1	16970657	16971933
1	16983243	16983593
1	16992206	16993123
1	16993315	16994069
1	17012382	17012693
1	17023197	17024398
1	17027536	17028307
1	17034128	17034618
1	17053870	17054332
1	17066325	17067131
1	17067328	17068189
1	17076752	17077244
1	17090516	17091402
1	17091578	17093599
1	17107640	17108135
1	17116987	17117890
1	17199336	17200446
1	17215187	17216104
1	17221820	17222569
1	17222757	17223943
1	17230302	17232248
1	17240662	17241192
1	17287151	17287731
1	17337874	17338451
1	17380001	17380613
1	17380843	17381189
1	17447577	17447888
1	17448185	17449072
1	17453882	17454903
1	17455129	17455901
1	17512549	17513372
1	17515733	17516565
1	17516707	17517456
1	17526945	17528306
1	17528530	17529161
1	17533221	17534312
1	17538373	17540047
1	17555201	17555987
1	17559120	17559619
1	17559802	17561035
1	17577474	17578182
1	17618744	17619105
1	17674416	17675336
1	17764357	17766101
1	17767463	17768857
1	17842834	17844059
1	17846136	17847151
1	17857793	17858919
1	17866345	17866908
1	17871660	17872084
1	17877982	17878368
1	17879562	17881312
1	17886008	17887181
1	17887487	17888741
1	17895713	17896715
1	17901415	17901795
1	17902034	17902778
1	17906248	17907700
1	17913586	17914951
1	17915032	17915751
1	17922352	17924781
1	17932622	17933043
1	17944382	17944693
1	17944768	17945336
1	17950604	17951572
1	18652252	18652912
1	18665825	18666384
1	18740131	18741676
1	18766615	18767274
1	18790316	18792064
1	18806407	18808965
1	18883787	18885043
1	18925316	18926424
1	18944454	18945170
1	18945257	18945918
1	18970154	18970547
1	18971959	18973358
1	18978462	18979361
1	18981802	18982163
1	18987954	18988806
1	18992385	18992979
1	18993331	18993832
1	18994123	18995356
1	18995531	18996144
1	19037459	19037905
1	19228662	19230302
1	19240701	19241114
1	19253242	19254986
1	19275637	19277422
1	19281903	19283064
1	19335986	19337676
1	19338206	19338817
1	19340966	19341429
1	19354191	19356502
1	19392416	19394256
1	19406078	19409604
1	19409898	19410257
1	19447930	19448281
1	19448898	19449209
1	19449826	19450157
1	19482552	19484642
1	19536207	19537837
1	19577612	19578757
1	19586391	19587264
1	19595774	19597690
1	19612064	19613220
1	19614339	19615275
1	19638050	19639368
1	19711589	19712822
1	19756904	19757446
1	19772391	19772913
1	19795081	19796026
1	19796197	19796719
1	19811231	19813061
1	19922764	19924209
1	19943258	19943569
1	19970154	19970686
1	19971009	19971765
1	19981169	19981480
1	20091682	20092896
1	20125551	20127070
1	20141365	20141681
1	20141818	20142501
1	20208516	20209524
1	20247191	20248664
1	20251227	20251861
1	20252052	20252777
1	20307700	20309087
1	20436793	20437497
1	20451187	20451671
1	20463717	20464724
1	20478497	20478816
1	20512326	20512938
1	20513417	20513890
1	20575463	20578023
1	20582088	20582585
1	20592045	20592356
1	20802407	20803023
1	20803204	20803866
1	20811388	20811947
1	20812136	20813697
1	20822034	20822782
1	20834157	20834840
1	20939452	20940548
1	20940739	20941073
1	20959957	20960520
1	20987320	20987957
1	20988034	20988559
1	21059220	21060533
1	21112653	21114522
1	21223838	21224175
1	21291215	21291591
1	21348377	21349688
1	21466477	21466788
1	21477006	21477367
1	21501543	21503365
1	21578030	21579348
1	21587748	21589690
1	21606481	21607735
1	21615855	21617277
1	21620573	21622007
1	21625100	21625581
1	21625899	21626260
1	21650321	21651972
1	21656154	21656982
1	21660335	21660658
1	21660747	21661740
1	21665432	21665959
1	21671352	21671965
1	21766209	21767095
1	21780178	21781535
1	21913816	21914204
1	21933701	21934143
1	21949278	21950220
1	21950378	21950985
1	21953550	21954030
1	21958333	21958782
1	21958939	21959461
1	21959926	21961158
1	21961310	21961981
1	21964810	21965205
1	21965422	21966338
1	21977787	21978193
1	21978401	21979788
1	21995491	21996959
1	22003260	22003633
1	22108538	22110331
1	22114699	22115317
1	22143567	22144042
1	22195897	22197127
1	22223050	22224423
1	22230707	22231553
1	22236496	22237193
1	22237670	22238439
1	22257836	22258423
1	22262177	22263712
1	22282356	22284520
1	22298472	22299448
1	22299677	22301168
1	22323392	22325784
1	22339537	22340462
1	22345167	22345545
1	22346149	22346462
1	22351397	22352932
1	22357923	22358817
1	22369091	22369697
1	22379108	22380246
1	22489687	22490715
1	22738694	22739023
1	22739384	22739839
1	22740933	22741323
1	22777819	22779273
1	23029019	23030012
1	23043760	23044139
1	23066380	23066878
1	23076455	23077877
1	23152517	23154218
1	23158225	23158730
1	23310184	23310500
1	23330947	23331317
1	23336775	23338283
1	23345909	23346867
1	23428453	23430053
1	23449725	23450267
1	23474986	23476505
1	23494118	23494558
1	23494711	23495409
1	23495989	23496682
1	23504114	23504686
1	23514605	23516136
1	23523549	23523944
1	23543473	23544349
1	23551111	23552496
1	23609798	23610231
1	23670072	23670884
1	23671044	23671809
1	23695036	23696476
1	23696601	23698012
1	23703077	23704603
1	23729134	23730452
1	23748363	23749526
1	23778020	23778636
1	23805004	23805516
1	23810376	23811094
1	23856956	23857750
1	23880916	23881428
1	23885652	23885976
1	23886227	23886554
1	24018184	24019397
1	24069535	24070841
1	24104034	24105300
1	24116282	24116768
1	24116837	24117490
1	24117689	24118299
1	24125303	24126038
1	24126251	24127217
1	24127502	24127818
1	24151475	24152445
1	24191433	24192134
1	24192300	24192915
1	24194205	24194733
1	24246113	24247747
1	24278002	24278841
1	24284959	24286932
1	24306256	24306813
1	24306922	24308144
1	24335518	24335916
1	24341463	24341812
1	24344853	24345268
1	24345663	24346281
1	24347513	24347877
1	24348325	24349234
1	24433956	24435920
1	24443727	24444969
1	24445175	24447464
1	24468472	24469778
1	24469853	24470617
1	24476566	24476968
1	24477188	24477901
1	24513432	24514305
1	24528607	24529042
1	24593271	24594138
1	24609635	24611032
1	24620592	24622194
1	24637955	24638627
1	24647806	24649337
1	24683715	24684211
1	24691363	24692430
1	24700861	24702517
1	24715060	24715986
1	24716077	24716763
1	24739760	24740916
1	24741368	24741958
1	24742461	24742800
1	24828399	24830036
1	24866410	24868648
1	24882208	24882966
1	24885899	24886617
1	24894318	24895014
1	24968802	24969547
1	24969719	24970508
1	25031394	25032987
1	25050412	25052545
1	25071909	25073037
1	25240710	25241441
1	25417793	25418186
1	25493619	25494161
1	25494308	25495752
1	25524222	25524612
1	25524671	25525386
1	25546897	25547227
1	25558570	25559775
1	25565667	25567256
1	25572859	25573992
1	25593964	25594567
1	25664293	25665553
1	25756298	25758123
1	25805085	25805765
1	25827256	25827599
1	25827829	25828340
1	25832907	25833472
1	25870092	25870967
1	25875561	25876773
1	25888435	25889084
1	25889347	25889701
1	25894593	25895680
1	25987651	25988249
1	26100232	26100589
1	26145835	26147254
1	26185383	26186571
1	26193562	26193939
1	26193993	26195159
1	26201317	26202775
1	26216316	26217595
1	26218969	26219319
1	26231562	26231952
1	26232213	26232933
1	26316459	26316790
1	26323788	26324611
1	26362051	26362502
1	26362657	26363222
1	26404454	26406291
1	26437233	26438224
1	26438360	26439060
1	26448634	26449055
1	26452432	26453057
1	26453151	26453912
1	26496356	26497064
1	26503517	26504545
1	26560591	26561548
1	26602355	26602824
1	26604321	26605043
1	26605212	26606983
1	26611029	26611820
1	26624467	26624811
1	26633352	26633912
1	26662504	26664023
1	26677514	26677978
1	26678234	26679064
1	26680210	26680586
1	26680927	26681496
1	26758295	26758720
1	26758805	26759520
1	26798279	26799565
1	26813206	26814828
1	26826839	26828198
1	26856239	26857740
1	26857905	26858881
1	26946545	26948415
1	27018806	27019588
1	27019695	27020182
1	27022190	27024099
1	27031738	27033179
1	27049513	27050235
1	27080211	27080613
1	27097530	27098283
1	27112492	27115083
1	27120581	27121272
1	27125894	27127594
1	27150816	27153085
1	27175307	27175931
1	27189667	27190735
1	27190900	27191510
1	27191834	27192388
1	27216164	27217321
1	27226414	27227448
1	27239853	27241504
1	27248149	27249131
1	27286156	27287422
1	27296843	27297486
1	27317367	27318978
1	27320302	27320810
1	27333987	27334640
1	27337159	27337547
1	27357589	27358730
1	27438119	27438594
1	27438878	27439385
1	27442123	27442926
1	27448798	27449739
1	27468414	27468954
1	27470751	27471424
1	27481105	27482641
1	27487778	27488791
1	27518554	27519336
1	27561120	27561886
1	27633035	27633594
1	27633650	27634222
1	27648605	27649569
1	27667632	27670102
1	27675490	27676626
1	27692219	27693555
1	27719055	27719420
1	27762100	27764092
1	27815964	27817711
1	27844132	27845477
1	27853982	27855205
1	27869180	27870046
1	27883504	27885411
1	27890064	27891751
1	27895119	27895763
1	27901382	27902660
1	27916319	27916938
1	27928034	27930621
1	27998247	27999618
1	28008615	28009691
1	28051213	28052194
1	28052519	28053080
1	28099720	28100505
1	28143563	28143911
1	28144528	28144877
1	28156789	28157944
1	28201433	28201793
1	28240419	28241150
1	28261457	28262018
1	28285592	28287044
1	28295409	28295878
1	28414312	28415219
1	28431081	28431806
1	28487151	28487934
1	28517170	28517514
1	28559123	28559564
1	28562599	28563368
1	28575227	28576784
1	28585220	28585795
1	28585982	28587026
1	28623303	28623844
1	28640375	28640700
1	28648258	28648691
1	28649030	28649482
1	28654988	28656230
1	28672429	28672806
1	28673080	28673544
1	28677749	28679097
1	28685604	28686090
1	28695850	28696976
1	28721977	28722288
1	28743448	28745057
1	28763598	28765465
1	28798155	28798663
1	28827190	28827638
1	28832614	28835291
1	28844667	28845702
1	28852433	28854344
1	28878845	28880211
1	28907532	28908358
1	28908476	28909441
1	28918794	28919142
1	28969141	28970521
1	28974379	28975201
1	28975453	28976129
1	28994399	28995322
1	28995533	28996332
1	29062862	29063212
1	29063367	29064494
1	29074441	29074851
1	29101671	29102415
1	29186363	29186882
1	29213304	29214527
1	29240485	29241760
1	29253215	29255183
1	29300261	29301071
1	29432210	29432521
1	29507493	29508516
1	29508693	29509228
1	29528455	29529411
1	29556931	29557374
1	29686199	29686510
1	29876053	29877890
1	30042280	30042937
1	30043079	30044331
1	30112349	30112793
1	30113127	30113489
1	30181588	30181899
1	30266146	30266498
1	30323970	30325329
1	30457339	30458772
1	30478940	30479313
1	30556274	30557529
1	30627030	30627616
1	30663564	30664081
1	30667440	30667809
1	30934854	30935226
1	30998431	30999590
1	31091413	31092211
1	31121853	31122516
1	31122688	31124199
1	31124319	31124930
1	31129879	31130560
1	31130715	31131385
1	31140933	31141474
1	31148347	31149091
1	31191564	31192226
1	31229684	31230088
1	31296116	31297537
1	31319828	31320457
1	31360665	31361419
1	31487014	31487543
1	31497658	31499210
1	31537649	31539094
1	31575470	31575851
1	31627231	31628509
1	31643856	31644284
1	31769059	31769698
1	31769893	31770369
1	31799742	31800911
1	31845695	31847240
1	31854054	31854422
1	31854725	31855400
1	31862622	31862955
1	31863054	31863551
1	31870519	31871263
1	31885932	31887254
1	31894557	31895645
1	31917227	31917730
1	31918069	31918401
1	31944717	31945085
1	31950089	31950418
1	31955332	31956282
1	31977082	31977495
1	32013544	32013855
1	32014090	32014645
1	32014832	32015640
1	32027686	32029789
1	32039818	32041981
1	32042228	32043098
1	32053751	32055165
1	32109669	32111023
1	32134990	32136471
1	32154138	32156544
1	32161566	32161879
1	32166261	32167935
1	32169364	32169944
1	32177745	32179146
1	32180108	32180728
1	32180965	32181285
1	32219097	32219748
1	32219868	32220319
1	32226254	32226659
1	32253752	32254272
1	32254640	32254951
1	32396904	32398179
1	32403143	32403951
1	32404271	32404607
1	32405125	32405551
1	32409686	32410955
1	32419840	32422394
1	32478743	32479100
1	32479349	32480349
1	32538154	32539100
1	32560073	32560587
1	32573555	32574881
1	32644821	32646380
1	32651334	32651992
1	32671324	32671822
1	32674168	32674580
1	32681136	32682130
1	32687189	32688590
1	32706125	32707449
1	32756444	32757537
1	32757616	32758296
1	32786062	32788833
1	32797607	32798851
1	32800641	32801716
1	32810746	32811460
1	32816406	32817942
1	32827267	32827985
1	32859524	32860094
1	32860341	32860933
1	32951583	32953453
1	32965789	32966548
1	33004749	33005133
1	33005383	33005783
1	33077890	33078421
1	33115809	33117604
1	33160347	33160984
1	33181250	33182326
1	33182492	33182958
1	33190346	33191429
1	33202715	33203457
1	33207011	33208778
1	33219563	33220844
1	33224547	33225765
1	33225975	33227243
1	33227547	33227959
1	33238316	33238666
1	33282004	33283018
1	33283159	33284219
1	33358691	33359814
1	33366031	33367502
1	33370366	33370791
1	33372506	33373646
1	33377915	33379142
1	33390558	33390899
1	33398935	33400448
1	33414135	33414642
1	33414712	33415489
1	33429384	33430005
1	33430188	33430891
1	33438262	33438926
1	33446134	33447542
1	33454457	33455281
1	33457718	33458067
1	33473684	33474051
1	33474540	33475057
1	33501772	33502545
1	33502836	33503183
1	33515062	33516832
1	33520966	33521331
1	33564311	33565039
1	33565404	33566111
1	33592418	33592970
1	33593149	33593552
1	33615180	33615581
1	33646695	33647201
1	33647277	33647627
1	33721406	33721795
1	33722500	33723054
1	33811776	33812622
1	33812768	33814299
1	33814611	33815249
1	33842179	33842519
1	33842758	33843484
1	33895997	33896588
1	33938492	33938825
1	34713026	34713343
1	35148712	35150037
1	35150089	35150866
1	35155263	35156510
1	35203862	35204384
1	35228718	35229903
1	35246371	35247809
1	35290736	35291943
1	35324637	35325504
1	35331324	35332002
1	35450370	35451317
1	35496525	35497954
1	35523737	35524715
1	35544561	35545651
1	35657660	35658755
1	35734177	35735101
1	35971155	35971514
1	35971896	35972928
1	35989529	35989902
1	35990001	35990420
1	36022116	36023678
1	36103072	36104105
1	36106594	36107698
1	36183183	36183500
1	36183885	36184994
1	36234613	36235608
1	36273526	36274471
1	36348813	36349612
1	36395927	36397429
1	36554438	36555504
1	36580594	36581351
1	36598698	36599187
1	36599359	36600180
1	36614647	36615145
1	36615706	36616500
1	36621093	36622567
1	36626379	36627074
1	36627204	36628333
1	36643860	36644720
1	36653409	36653892
1	36689163	36689748
1	36689907	36690907
1	36713681	36714303
1	36714457	36714951
1	36723611	36724218
1	36765768	36766489
1	36770990	36772620
1	36788629	36789838
1	36838737	36840260
1	36840453	36841173
1	36850730	36853114
1	36863007	36863472
1	36866093	36867560
1	36898335	36898974
1	36902059	36902626
1	36916041	36916839
1	36929328	36930654
1	36952040	36953496
1	37216658	37217048
1	37217473	37219268
1	37322319	37322686
1	37936902	37938065
1	37940330	37940674
1	37942451	37943251
1	37944453	37945361
1	37945598	37946105
1	37964161	37964734
1	37979756	37981030
1	37999707	38001290
1	38019374	38020020
1	38060979	38061622
1	38155617	38156143
1	38157323	38157871
1	38158208	38158603
1	38163150	38163461
1	38259289	38260449
1	38272994	38274603
1	38324724	38326014
1	38345058	38346237
1	38397069	38397452
1	38406153	38406548
1	38412036	38413101
1	38454917	38455755
1	38455835	38456404
1	38461460	38461799
1	38464657	38466712
1	38470674	38471190
1	38478276	38478952
1	38495045	38495934
1	38496004	38497582
1	38504163	38505260
1	38512654	38513537
1	38712320	38712686
1	38731526	38731878
1	39212066	39212896
1	39212998	39213604
1	39324692	39325481
1	39325634	39326004
1	39338396	39339186
1	39339272	39339732
1	39406349	39407646
1	39416280	39417260
1	39418669	39419154
1	39423895	39426006
1	39433834	39435718
1	39451148	39452479
1	39456329	39457829
1	39491518	39492951
1	39570611	39571954
1	39581920	39582288
1	39594278	39594617
1	39594935	39595315
1	39598276	39599012
1	39623590	39625124
1	39648996	39649490
1	39649695	39650381
1	39657544	39658517
1	39809824	39810658
1	39843527	39843892
1	39844399	39844746
1	39852770	39853326
1	39859988	39861273
1	39861550	39862008
1	39863723	39864326
1	39864614	39865308
1	39873691	39874455
1	39874590	39875391
1	39970757	39971147
1	40032683	40033191
1	40041316	40042489
1	40204521	40205047
1	40254437	40255463
1	40264547	40265541
1	40282683	40284039
1	40311677	40312476
1	40318153	40318528
1	40348720	40349547
1	40358720	40359031
1	40366754	40368112
1	40399438	40399749
1	40420939	40421499
1	40445953	40447204
1	40447311	40447663
1	40454089	40454895
1	40494802	40496643
1	40496790	40497101
1	40505269	40506248
1	40506367	40506916
1	40524478	40525858
1	40562540	40563334
1	40572496	40574335
1	40596290	40596657
1	40597048	40597380
1	40605603	40606771
1	40626551	40627668
1	40722733	40723710
1	40723880	40724339
1	40839298	40840173
1	40840232	40840607
1	40849579	40850655
1	40915745	40916207
1	40973978	40974893
1	40996848	40997159
1	40997255	40997919
1	41157209	41158305
1	41174503	41175473
1	41249110	41249446
1	41328226	41328842
1	41329395	41329882
1	41333690	41334016
1	41341005	41342125
1	41362918	41363364
1	41363824	41365344
1	41365575	41365936
1	41384180	41385811
1	41397141	41398290
1	41405054	41405643
1	41405880	41406204
1	41414103	41414778
1	41444924	41446288
1	41468759	41469395
1	41574481	41576105
1	41706825	41708430
1	41771538	41772224
1	41807451	41808327
1	41819015	41819436
1	41819681	41820425
1	41827150	41827764
1	41831790	41832560
1	41847376	41847786
1	41847887	41848737
1	41884186	41884628
1	41884689	41885246
1	41898045	41899405
1	41919809	41920120
1	41962104	41962415
1	41965783	41966207
1	41966310	41967168
1	41979604	41980123
1	41980404	41981794
1	42092228	42092711
1	42128112	42128740
1	42149157	42150288
1	42306076	42306818
1	42317528	42318107
1	42327608	42328785
1	42347477	42348369
1	42356742	42357407
1	42381298	42381639
1	42381985	42382410
1	42419846	42420397
1	42420692	42422006
1	42446404	42448306
1	42500863	42501731
1	42509265	42509576
1	42630404	42631627
1	42671366	42671969
1	42672195	42672736
1	42679730	42681291
1	42732179	42732761
1	42748070	42748584
1	42786279	42786805
1	42799954	42801635
1	42806155	42807079
1	42835991	42837283
1	42846072	42846432
1	42846511	42846878
1	42905207	42905540
1	42921630	42922781
1	42928364	42928803
1	43123495	43124682
1	43147344	43147883
1	43148030	43149271
1	43157491	43159064
1	43174814	43175132
1	43231942	43232509
1	43232879	43233475
1	43282335	43283200
1	43312221	43312683
1	43389429	43391403
1	43397185	43398018
1	43398108	43398739
1	43403653	43403969
1	43404392	43404937
1	43405299	43405617
1	43409251	43409850
1	43423401	43424468
1	43427893	43428309
1	43432303	43432799
1	43432921	43433727
1	43438883	43439489
1	43445114	43447196
1	43457338	43458380
1	43472739	43474541
1	43474602	43475248
1	43499573	43500006
1	43500228	43501365
1	43501506	43502075
1	43505505	43506023
1	43533657	43535028
1	43538943	43539256
1	43585778	43587094
1	43637454	43638254
1	43671688	43673581
1	43712408	43713326
1	43722018	43723039
1	43735724	43737052
1	43739891	43740608
1	43750296	43752276
1	43760691	43761535
1	43795952	43796580
1	43814041	43815785
1	43823797	43825147
1	43832195	43834464
1	43838161	43838811
1	43839006	43840220
1	43855050	43856123
1	43918885	43920272
1	43938671	43938998
1	43975079	43975542
1	43975925	43976275
1	43988548	43988859
1	43996399	43998194
1	44002444	44003695
1	44010669	44011483
1	44011564	44011984
1	44012078	44012403
1	44015222	44016652
1	44018046	44018449
1	44023021	44023463
1	44023744	44024506
1	44047074	44048041
1	44048116	44048942
1	44115086	44116713
1	44172515	44172988
1	44173239	44173910
1	44412045	44413067
1	44439796	44441321
1	44445088	44445653
1	44445761	44446240
1	44456457	44457815
1	44495487	44497185
1	44619992	44621273
1	44678988	44679487
1	44792831	44793599
1	44793801	44794480
1	44799326	44799648
1	44820445	44821041
1	45011806	45012245
1	45097051	45098217
1	45125564	45125928
1	45126251	45126562
1	45139611	45140700
1	45141824	45142626
1	45173827	45174341
1	45178706	45179044
1	45187436	45188215
1	45195552	45197246
1	45205001	45206119
1	45240750	45242179
1	45249653	45250372
1	45256604	45257455
1	45265240	45266623
1	45271824	45274891
1	45284497	45285401
1	45285531	45286179
1	45390052	45390969
1	45451604	45452441
1	45476337	45477010
1	45477270	45477609
1	45599824	45600135
1	45600234	45600871
1	45645186	45646078
1	45671728	45672306
1	45711836	45712997
1	45731647	45732609
1	45768799	45769274
1	45769462	45770307
1	45792579	45793744
1	45801094	45801634
1	45801904	45802254
1	45804916	45806288
1	45876524	45877213
1	45877393	45877784
1	45956170	45956818
1	45965998	45966613
1	45986814	45988387
1	46015821	46017196
1	46022648	46022984
1	46031852	46032634
1	46049219	46050401
1	46109451	46110481
1	46151540	46154190
1	46215705	46216998
1	46268574	46269895
1	46357449	46358607
1	46419922	46420650
1	46438496	46438959
1	46439129	46439496
1	46444135	46444828
1	46445048	46445638
1	46527948	46529302
1	46597711	46599212
1	46636700	46638153
1	46646238	46647905
1	46648036	46648880
1	46649112	46650266
1	46652925	46653274
1	46653499	46653810
1	46663383	46664638
1	46712528	46712887
1	46713468	46714065
1	46768070	46769860
1	46804989	46806844
1	46859854	46860998
1	46867107	46867983
1	46918463	46919787
1	46954721	46955429
1	46982155	46982647
1	46983156	46983687
1	46985397	46986230
1	46986530	46987117
1	46987784	46988211
1	46992223	46992717
1	47023524	47024073
1	47069308	47070005
1	47076959	47078140
1	47082080	47082741
1	47087764	47088218
1	47108639	47109125
1	47109293	47109737
1	47133406	47134474
1	47141024	47141831
1	47152360	47153060
1	47153218	47154013
1	47184285	47185470
1	47222717	47224104
1	47254272	47255197
1	47272106	47272801
1	47323055	47323940
1	47413910	47414395
1	47496435	47496746
1	47496982	47497327
1	47573148	47574264
1	47645019	47645909
1	47655375	47656626
1	47657475	47657815
1	47657888	47658696
1	47779387	47779842
1	47780065	47780744
1	47788649	47790176
1	47798795	47801215
1	47897631	47898060
1	47902405	47904040
1	47942880	47943270
1	47943401	47943954
1	47973295	47975055
1	48021347	48021701
1	48024123	48026157
1	48026429	48026820
1	48035153	48035949
1	48043208	48045401
1	48115325	48117653
1	48150572	48151124
1	48162223	48164696
1	48174420	48175983
1	48274274	48275778
1	48275829	48276519
1	48302964	48303697
1	48303779	48304274
1	48309743	48310235
1	48337217	48337663
1	48337987	48338631
1	48360669	48361352
1	48372025	48372654
1	48383708	48384914
1	48406843	48408536
1	48462659	48462970
1	48687806	48688674
1	48688782	48689130
1	48716185	48716853
1	48937564	48937875
1	48938082	48938393
1	49812008	49812569
1	49812792	49813581
1	49878655	49879021
1	49879111	49879428
1	50940893	50941357
1	51068756	51070154
1	51086547	51086881
1	51096343	51096962
1	51099370	51099959
1	51425147	51426061
1	51426230	51426680
1	51433497	51435393
1	51443690	51444074
1	51498174	51498694
1	51701696	51702797
1	51762731	51763353
1	51779205	51780898
1	51794772	51796067
1	51796126	51796724
1	51797079	51797559
1	51810340	51810806
1	51887468	51887779
1	51887937	51888299
1	51899012	51899371
1	51983690	51984990
1	52023654	52024249
1	52024320	52024886
1	52034596	52036480
1	52082801	52083112
1	52087616	52088284
1	52088482	52088935
1	52109884	52110357
1	52110439	52111009
1	52194841	52196105
1	52202751	52203236
1	52343689	52344461
1	52344578	52345265
1	52442290	52442604
1	52498565	52499559
1	52520480	52522482
1	52545558	52545869
1	52607712	52608488
1	52642317	52643263
1	52831007	52832010
1	52869763	52870800
1	53018094	53019431
1	53163296	53164611
1	53169007	53169654
1	53192070	53192645
1	53386735	53387511
1	53393065	53393450
1	53480080	53481276
1	53513150	53513848
1	53554957	53555268
1	53555767	53556186
1	53556292	53556637
1	53573566	53573920
1	53575923	53577614
1	53601268	53601675
1	53611238	53612712
1	53648160	53649660
1	53662023	53663201
1	53685446	53686720
1	53703756	53704795
1	53761652	53762137
1	53762224	53762626
1	53791258	53793566
1	53877689	53878873
1	53879043	53880478
1	53889392	53890066
1	53895763	53897487
1	53897855	53898337
1	53902899	53903547
1	53915454	53915818
1	54163860	54164409
1	54164690	54165012
1	54303171	54304376
1	54354993	54355930
1	54365093	54365564
1	54410861	54411277
1	54411640	54412491
1	54421828	54423508
1	54447821	54448966
1	54481692	54482820
1	54517727	54519057
1	54536039	54536446
1	54665262	54665628
1	54665778	54666496
1	54693356	54693667
1	54738749	54739716
1	54753076	54753566
1	54755834	54756781
1	54763804	54764115
1	54778334	54778674
1	54800760	54801348
1	54813356	54814101
1	54814258	54814707
1	54822000	54822541
1	54842549	54843127
1	54848792	54849144
1	54850246	54850588
1	54871616	54871927
1	54872214	54873253
1	54873559	54873954
1	54953607	54953930
1	54954051	54955255
1	55007336	55008853
1	55029511	55031100
1	55181388	55182034
1	55229259	55230258
1	55259943	55261749
1	55266262	55267453
1	55323676	55324125
1	55351703	55353509
1	55420532	55422011
1	55431284	55431947
1	55436609	55437309
1	55446085	55446636
1	55454844	55456271
1	55680209	55681810
1	55894316	55894731
1	55895060	55896777
1	56855773	56856104
1	56897999	56898520
1	56916938	56917325
1	56917441	56918003
1	56973792	56974244
1	56974444	56974759
1	56981923	56983391
1	57044084	57045456
1	57153570	57154206
1	57154454	57155346
1	58860770	58861906
1	59011546	59012559
1	59038627	59038952
1	59042032	59042946
1	59049601	59050253
1	59050443	59051052
1	59085257	59086043
1	59086260	59086669
1	59165156	59165995
1	59205806	59206117
1	59211902	59212583
1	59212644	59213246
1	59220535	59222007
1	59228013	59229977
1	59248755	59249601
1	59249998	59251569
1	59270999	59272616
1	59279354	59282470
1	59289288	59289822
1	59290226	59291523
1	59314239	59315388
1	59340310	59341245
1	59348458	59349106
1	59349218	59351096
1	59351353	59352386
1	59361076	59361701
1	59361839	59362936
1	59368850	59370110
1	59394944	59395442
1	59397858	59398589
1	59398785	59399406
1	59408193	59409167
1	59433764	59434758
1	59494895	59496401
1	59509875	59510253
1	59518168	59519147
1	59597838	59598483
1	59608181	59608837
1	59612436	59612853
1	59761496	59763213
1	59892469	59893467
1	59917055	59917405
1	59940582	59940893
1	59941147	59941458
1	59952538	59953419
1	59964652	59966924
1	60021970	60022497
1	60022579	60023535
1	60196395	60197380
1	60203802	60204406
1	60204499	60205154
1	60280488	60281223
1	60358732	60359267
1	60955305	60956258
1	61038422	61040301
1	61515788	61516882
1	61522702	61523623
1	61542168	61543469
1	61547536	61547911
1	61548204	61549567
1	61597541	61599612
1	61606453	61607370
1	61617647	61618807
1	61649334	61650688
1	61718783	61719109
1	61803393	61804490
1	61890282	61890941
1	61915932	61916328
1	61916521	61916927
1	61946328	61947159
1	61952785	61953972
1	62190345	62191484
1	62207221	62209166
1	62646148	62646499
1	62901443	62902076
1	62902303	62903486
1	63153253	63154531
1	63225801	63226265
1	63249188	63250108
1	63832822	63833810
1	63988438	63989748
1	64058988	64060201
1	64106022	64107730
1	64127377	64129443
1	64135084	64135677
1	64140432	64140890
1	64157816	64158381
1	64163562	64164521
1	64169989	64171027
1	64239607	64240901
1	64282377	64283382
1	64312195	64313749
1	64342418	64343492
1	64343633	64344114
1	64385454	64386088
1	64386387	64387342
1	64394523	64394895
1	64400827	64401948
1	64434607	64435425
1	64435686	64437085
1	64437570	64438243
1	64446238	64446737
1	64448929	64449337
1	64449500	64450381
1	64471414	64473639
1	64503573	64504063
1	64504183	64505366
1	64505611	64505959
1	64516712	64517770
1	64518100	64519104
1	64526807	64527606
1	64527756	64528408
1	64601134	64601608
1	64637135	64638151
1	64748368	64748940
1	65210288	65211720
1	65220343	65221549
1	65330045	65330453
1	65363394	65364813
1	65381853	65383058
1	65414224	65415960
1	65431584	65432858
1	65446837	65447965
1	65532275	65533109
1	65574049	65574670
1	65612912	65613863
1	65613973	65614893
1	65642683	65643268
1	65720201	65720547
1	65886252	65887251
1	65932927	65933344
1	65933540	65934000
1	66020147	66020679
1	66946683	66947011
1	67008181	67009317
1	67029513	67030022
1	67030376	67030910
1	67057450	67058068
1	67389996	67391534
1	67395576	67396756
1	67519069	67520176
1	67604396	67605285
1	67613625	67614162
1	67614429	67615043
1	67895209	67896081
1	67896230	67896979
1	67999805	68000376
1	68000587	68001139
1	68027657	68028462
1	68038433	68038994
1	68045433	68045759
1	68097563	68098444
1	68150972	68152496
1	68178584	68180034
1	68182764	68183122
1	68189783	68190666
1	68190810	68191570
1	68201331	68202708
1	68214205	68216284
1	68225302	68226035
1	68281073	68282643
1	68290708	68291025
1	68296942	68299336
1	68355401	68355712
1	68355968	68356367
1	68362764	68364100
1	68372836	68373288
1	68373420	68374165
1	68610789	68612390
1	68639978	68640306
1	68643192	68644599
1	68662720	68663616
1	68663689	68664431
1	68679395	68679769
1	68680108	68680419
1	68680471	68681099
1	68697295	68698521
1	68961956	68962790
1	69347056	69347549
1	69389170	69389481
1	70376437	70377175
1	70377236	70377847
1	70395067	70395861
1	70670872	70672072
1	70686648	70688032
1	70819628	70820866
1	70876201	70877633
1	70894508	70894834
1	70895147	70895626
1	71217183	71217588
1	71217781	71218699
1	71545957	71547299
1	74058404	74060432
1	74070034	74071060
1	74268527	74269200
1	74269445	74269776
1	74271098	74271809
1	74445508	74446324
1	74446797	74447280
1	74663548	74664487
1	74818494	74818953
1	75117793	75118319
1	75118376	75119545
1	75196726	75199416
1	75840610	75842061
1	75848643	75849014
1	76189691	76191073
1	76251398	76253136
1	77464548	77465053
1	77484619	77485213
1	77496456	77497817
1	77505008	77506478
1	77522452	77523128
1	77523403	77524070
1	77684377	77685736
1	77787581	77788645
1	77877844	77878819
1	77912426	77913640
1	78148005	78149785
1	78224668	78225657
1	78245264	78246021
1	78277272	78277584
1	78444000	78445743
1	78468683	78469056
1	78469110	78471090
1	78510775	78512512
1	78521167	78522190
1	78702318	78703391
1	78703657	78704082
1	79085360	79086807
1	79114976	79116640
1	79545661	79546224
1	79593868	79594564
1	79616424	79617657
1	79627215	79627566
1	79652717	79654722
1	79658087	79659996
1	79788590	79788937
1	81059269	81059828
1	81059946	81060299
1	81333995	81334367
1	81334478	81335236
1	81644623	81645007
1	81645333	81645699
1	82125525	82126135
1	82126273	82126637
1	82144879	82145190
1	82146442	82147372
1	82147577	82148191
1	82168830	82169166
1	82196083	82196450
1	82196784	82197778
1	82225411	82225864
1	82617470	82618877
1	82693092	82693420
1	82789853	82790164
1	83030820	83031355
1	83563964	83565482
1	83577573	83578259
1	83578388	83578971
1	83579536	83579978
1	83599806	83601166
1	83610850	83611608
1	83611739	83612100
[truncated: 46,648 more rows]

## Sheet: Supplementary Table 9c
Supplementary Table 9c. List of H3k27ac ChIP-seq peak regions in PrEC cell line
Chromosomes	Start	End
1	10202	10203
1	29050	29051
1	38999	39000
1	459626	459627
1	523717	523718
1	540829	540830
1	565170	565171
1	567382	567383
1	713844	713845
1	714421	714422
1	742917	742918
1	753069	753070
1	762750	762751
1	839812	839813
1	840520	840521
1	894357	894358
1	896253	896254
1	902119	902120
1	911745	911746
1	935914	935915
1	948680	948681
1	955127	955128
1	955970	955971
1	960515	960516
1	975959	975960
1	994707	994708
1	1009448	1009449
1	1015316	1015317
1	1051206	1051207
1	1052085	1052086
1	1080146	1080147
1	1093475	1093476
1	1098672	1098673
1	1136946	1136947
1	1143776	1143777
1	1167150	1167151
1	1168070	1168071
1	1173529	1173530
1	1173965	1173966
1	1185603	1185604
1	1186147	1186148
1	1186820	1186821
1	1208945	1208946
1	1217495	1217496
1	1240630	1240631
1	1243093	1243094
1	1243616	1243617
1	1244223	1244224
1	1253443	1253444
1	1260509	1260510
1	1268708	1268709
1	1280039	1280040
1	1280824	1280825
1	1284178	1284179
1	1295837	1295838
1	1310345	1310346
1	1311208	1311209
1	1334380	1334381
1	1335063	1335064
1	1343032	1343033
1	1355173	1355174
1	1357133	1357134
1	1363136	1363137
1	1366098	1366099
1	1369143	1369144
1	1397594	1397595
1	1407335	1407336
1	1440827	1440828
1	1447100	1447101
1	1510101	1510102
1	1531259	1531260
1	1551008	1551009
1	1562458	1562459
1	1590487	1590488
1	1617608	1617609
1	1618163	1618164
1	1624292	1624293
1	1655621	1655622
1	1672333	1672334
1	1677655	1677656
1	1689898	1689899
1	1690753	1690754
1	1709623	1709624
1	1714342	1714343
1	1767501	1767502
1	1773749	1773750
1	1790633	1790634
1	1821873	1821874
1	1840197	1840198
1	1850313	1850314
1	1851385	1851386
1	1900335	1900336
1	1901014	1901015
1	1981406	1981407
1	1982121	1982122
1	2064587	2064588
1	2066899	2066900
1	2071860	2071861
1	2120860	2120861
1	2121412	2121413
1	2126402	2126403
1	2137075	2137076
1	2139546	2139547
1	2144443	2144444
1	2158818	2158819
1	2161306	2161307
1	2165652	2165653
1	2166385	2166386
1	2187037	2187038
1	2222516	2222517
1	2230666	2230667
1	2246214	2246215
1	2254054	2254055
1	2266248	2266249
1	2275390	2275391
1	2322831	2322832
1	2323515	2323516
1	2343822	2343823
1	2344605	2344606
1	2360377	2360378
1	2381479	2381480
1	2383097	2383098
1	2383760	2383761
1	2397680	2397681
1	2425763	2425764
1	2426209	2426210
1	2437666	2437667
1	2438255	2438256
1	2454570	2454571
1	2455287	2455288
1	2457365	2457366
1	2457941	2457942
1	2464703	2464704
1	2465375	2465376
1	2466009	2466010
1	2478118	2478119
1	2480131	2480132
1	2488142	2488143
1	2509770	2509771
1	2510260	2510261
1	2517616	2517617
1	2518516	2518517
1	2574311	2574312
1	3370179	3370180
1	3371420	3371421
1	3376281	3376282
1	3381949	3381950
1	3389732	3389733
1	3398647	3398648
1	3411119	3411120
1	3432697	3432698
1	3433233	3433234
1	3447697	3447698
1	3448490	3448491
1	3459489	3459490
1	3469908	3469909
1	3470458	3470459
1	3541822	3541823
1	3566505	3566506
1	3591388	3591389
1	3598037	3598038
1	3616134	3616135
1	3619870	3619871
1	3633830	3633831
1	3634301	3634302
1	3663707	3663708
1	3689532	3689533
1	3712772	3712773
1	3773506	3773507
1	3774193	3774194
1	3817588	3817589
1	4417177	4417178
1	4711088	4711089
1	4715873	4715874
1	4886900	4886901
1	4897834	4897835
1	5642881	5642882
1	5712860	5712861
1	5810639	5810640
1	5961011	5961012
1	5999126	5999127
1	5999774	5999775
1	6052280	6052281
1	6085876	6085877
1	6134684	6134685
1	6217608	6217609
1	6259416	6259417
1	6260124	6260125
1	6265859	6265860
1	6280127	6280128
1	6281083	6281084
1	6295774	6295775
1	6309675	6309676
1	6320483	6320484
1	6327388	6327389
1	6328148	6328149
1	6355031	6355032
1	6360330	6360331
1	6361301	6361302
1	6362121	6362122
1	6385418	6385419
1	6386064	6386065
1	6404177	6404178
1	6408948	6408949
1	6410381	6410382
1	6412258	6412259
1	6419045	6419046
1	6427278	6427279
1	6428313	6428314
1	6433829	6433830
1	6446316	6446317
1	6453024	6453025
1	6453871	6453872
1	6475064	6475065
1	6479689	6479690
1	6507687	6507688
1	6518083	6518084
1	6531895	6531896
1	6532466	6532467
1	6549080	6549081
1	6550967	6550968
1	6552231	6552232
1	6557231	6557232
1	6580234	6580235
1	6605176	6605177
1	6605896	6605897
1	6614434	6614435
1	6640285	6640286
1	6641782	6641783
1	6647048	6647049
1	6648027	6648028
1	6662024	6662025
1	6663372	6663373
1	6669962	6669963
1	6673162	6673163
1	6674534	6674535
1	6685509	6685510
1	6761604	6761605
1	6803718	6803719
1	6804424	6804425
1	6822490	6822491
1	6844456	6844457
1	6884597	6884598
1	6979393	6979394
1	7170260	7170261
1	7177954	7177955
1	7325565	7325566
1	7326395	7326396
1	7439915	7439916
1	7586373	7586374
1	7609895	7609896
1	7628909	7628910
1	7806387	7806388
1	7831558	7831559
1	7843652	7843653
1	7844533	7844534
1	8014148	8014149
1	8014625	8014626
1	8021307	8021308
1	8021907	8021908
1	8064493	8064494
1	8065798	8065799
1	8067173	8067174
1	8086069	8086070
1	8086725	8086726
1	8100565	8100566
1	8101229	8101230
1	8107607	8107608
1	8108440	8108441
1	8116510	8116511
1	8121111	8121112
1	8122425	8122426
1	8130770	8130771
1	8136374	8136375
1	8137928	8137929
1	8143778	8143779
1	8144324	8144325
1	8150959	8150960
1	8157193	8157194
1	8158076	8158077
1	8181289	8181290
1	8193844	8193845
1	8215960	8215961
1	8229634	8229635
1	8235054	8235055
1	8242071	8242072
1	8243027	8243028
1	8255091	8255092
1	8257661	8257662
1	8264194	8264195
1	8271968	8271969
1	8277383	8277384
1	8284793	8284794
1	8298767	8298768
1	8318866	8318867
1	8319570	8319571
1	8403887	8403888
1	8455527	8455528
1	8457508	8457509
1	8484103	8484104
1	8509286	8509287
1	8585680	8585681
1	8586343	8586344
1	8600268	8600269
1	8720869	8720870
1	8722671	8722672
1	8731999	8732000
1	8740600	8740601
1	8763206	8763207
1	8772732	8772733
1	8794047	8794048
1	8800060	8800061
1	8800792	8800793
1	8849972	8849973
1	8857759	8857760
1	8878127	8878128
1	8938479	8938480
1	8939239	8939240
1	8950748	8950749
1	8959957	8959958
1	8960464	8960465
1	8965592	8965593
1	8972164	8972165
1	9046684	9046685
1	9061562	9061563
1	9129041	9129042
1	9138960	9138961
1	9146027	9146028
1	9172641	9172642
1	9173498	9173499
1	9175007	9175008
1	9188678	9188679
1	9189541	9189542
1	9211994	9211995
1	9223662	9223663
1	9242545	9242546
1	9295170	9295171
1	9340758	9340759
1	9353274	9353275
1	9360086	9360087
1	9360738	9360739
1	9377594	9377595
1	9381327	9381328
1	9391511	9391512
1	9473584	9473585
1	9488802	9488803
1	9489354	9489355
1	9504593	9504594
1	9510128	9510129
1	9526759	9526760
1	9599814	9599815
1	9611264	9611265
1	9653497	9653498
1	9704679	9704680
1	9705205	9705206
1	9725782	9725783
1	9731284	9731285
1	9731890	9731891
1	9733685	9733686
1	9747810	9747811
1	9749913	9749914
1	9759958	9759959
1	9761606	9761607
1	9762177	9762178
1	9779646	9779647
1	9781249	9781250
1	9816276	9816277
1	9819082	9819083
1	9826555	9826556
1	9827418	9827419
1	9835561	9835562
1	9836198	9836199
1	9865126	9865127
1	9883730	9883731
1	9884512	9884513
1	9896202	9896203
1	9897088	9897089
1	9903370	9903371
1	9929693	9929694
1	9930280	9930281
1	9937871	9937872
1	9942360	9942361
1	9950314	9950315
1	9950920	9950921
1	9951547	9951548
1	9953096	9953097
1	9953891	9953892
1	9959364	9959365
1	9969915	9969916
1	9971049	9971050
1	10003244	10003245
1	10093240	10093241
1	10123845	10123846
1	10124444	10124445
1	10126779	10126780
1	10128774	10128775
1	10134976	10134977
1	10143747	10143748
1	10166771	10166772
1	10167738	10167739
1	10230126	10230127
1	10270211	10270212
1	10271280	10271281
1	10447679	10447680
1	10459247	10459248
1	10475783	10475784
1	10491063	10491064
1	10517236	10517237
1	10518814	10518815
1	10532386	10532387
1	10535192	10535193
1	10555868	10555869
1	10556563	10556564
1	10575534	10575535
1	10588360	10588361
1	10616089	10616090
1	10660033	10660034
1	10696058	10696059
1	10704163	10704164
1	10735590	10735591
1	10754198	10754199
1	10755220	10755221
1	10760381	10760382
1	10786830	10786831
1	10804563	10804564
1	10816431	10816432
1	10825803	10825804
1	10839024	10839025
1	10856451	10856452
1	10864398	10864399
1	10879139	10879140
1	10884951	10884952
1	10885784	10885785
1	10891597	10891598
1	10892565	10892566
1	10927207	10927208
1	10951408	10951409
1	10960249	10960250
1	10980298	10980299
1	11002073	11002074
1	11035678	11035679
1	11072920	11072921
1	11085606	11085607
1	11086590	11086591
1	11119829	11119830
1	11120522	11120523
1	11159666	11159667
1	11160284	11160285
1	11194909	11194910
1	11199469	11199470
1	11208128	11208129
1	11218626	11218627
1	11219250	11219251
1	11322446	11322447
1	11323127	11323128
1	11333381	11333382
1	11376881	11376882
1	11392884	11392885
1	11505704	11505705
1	11629501	11629502
1	11714609	11714610
1	11715211	11715212
1	11724548	11724549
1	11741054	11741055
1	11779677	11779678
1	11792270	11792271
1	11796832	11796833
1	11865789	11865790
1	11866414	11866415
1	11968048	11968049
1	11969436	11969437
1	11986093	11986094
1	11994910	11994911
1	12028161	12028162
1	12039671	12039672
1	12040644	12040645
1	12061512	12061513
1	12062401	12062402
1	12079843	12079844
1	12111664	12111665
1	12291116	12291117
1	12344454	12344455
1	12416630	12416631
1	12440986	12440987
1	12441783	12441784
1	12538984	12538985
1	12634315	12634316
1	12656284	12656285
1	12677169	12677170
1	12678140	12678141
1	12679724	12679725
1	13910829	13910830
1	13913230	13913231
1	13914305	13914306
1	13920266	13920267
1	13926670	13926671
1	13944802	13944803
1	13991520	13991521
1	14011278	14011279
1	14026797	14026798
1	14076038	14076039
1	14084855	14084856
1	14085547	14085548
1	14086059	14086060
1	14093490	14093491
1	14127554	14127555
1	14464395	14464396
1	14465094	14465095
1	14516915	14516916
1	14803691	14803692
1	14843720	14843721
1	14847120	14847121
1	15060056	15060057
1	15069176	15069177
1	15234380	15234381
1	15237570	15237571
1	15240040	15240041
1	15251264	15251265
1	15272476	15272477
1	15347016	15347017
1	15479475	15479476
1	15480447	15480448
1	15498997	15498998
1	15506014	15506015
1	15527457	15527458
1	15572860	15572861
1	15609792	15609793
1	15630167	15630168
1	15668452	15668453
1	15678876	15678877
1	15679530	15679531
1	15727604	15727605
1	15736832	15736833
1	15743167	15743168
1	15753098	15753099
1	15850546	15850547
1	15851222	15851223
1	15851866	15851867
1	15853499	15853500
1	15885586	15885587
1	15911258	15911259
1	15930495	15930496
1	15936806	15936807
1	15944200	15944201
1	16007064	16007065
1	16008422	16008423
1	16010500	16010501
1	16011300	16011301
1	16030108	16030109
1	16062966	16062967
1	16072304	16072305
1	16085552	16085553
1	16092180	16092181
1	16092797	16092798
1	16113664	16113665
1	16115117	16115118
1	16122201	16122202
1	16123808	16123809
1	16126251	16126252
1	16127549	16127550
1	16143587	16143588
1	16161808	16161809
1	16173859	16173860
1	16174509	16174510
1	16176095	16176096
1	16212641	16212642
1	16213481	16213482
1	16219973	16219974
1	16220337	16220338
1	16243478	16243479
1	16249633	16249634
1	16250275	16250276
1	16265893	16265894
1	16276008	16276009
1	16276640	16276641
1	16279019	16279020
1	16279853	16279854
1	16302332	16302333
1	16334150	16334151
1	16375328	16375329
1	16399966	16399967
1	16408771	16408772
1	16418269	16418270
1	16450045	16450046
1	16450722	16450723
1	16471636	16471637
1	16473205	16473206
1	16479521	16479522
1	16479995	16479996
1	16482240	16482241
1	16494206	16494207
1	16499609	16499610
1	16500583	16500584
1	16502406	16502407
1	16508266	16508267
1	16510841	16510842
1	16533436	16533437
1	16543638	16543639
1	16563464	16563465
1	16575182	16575183
1	16627525	16627526
1	16647295	16647296
1	16648152	16648153
1	16678751	16678752
1	16693926	16693927
1	16712243	16712244
1	16722896	16722897
1	16723719	16723720
1	16767463	16767464
1	16784559	16784560
1	16825469	16825470
1	16840185	16840186
1	16840893	16840894
1	16861288	16861289
1	16886620	16886621
1	16887430	16887431
1	16939858	16939859
1	16950359	16950360
1	16971380	16971381
1	16992747	16992748
1	16993606	16993607
1	17035957	17035958
1	17066852	17066853
1	17067605	17067606
1	17086623	17086624
1	17108106	17108107
1	17122860	17122861
1	17199538	17199539
1	17215868	17215869
1	17222297	17222298
1	17223055	17223056
1	17231555	17231556
1	17240874	17240875
1	17252061	17252062
1	17252764	17252765
1	17256546	17256547
1	17275413	17275414
1	17287534	17287535
1	17307785	17307786
1	17325565	17325566
1	17330270	17330271
1	17330854	17330855
1	17338148	17338149
1	17353768	17353769
1	17354424	17354425
1	17380268	17380269
1	17381062	17381063
1	17454579	17454580
1	17455380	17455381
1	17466044	17466045
1	17517010	17517011
1	17541834	17541835
1	17560110	17560111
1	17572259	17572260
1	17577819	17577820
1	17592194	17592195
1	17616080	17616081
1	17624464	17624465
1	17625034	17625035
1	17630899	17630900
1	17636485	17636486
1	17667552	17667553
1	17674806	17674807
1	17675389	17675390
1	17695776	17695777
1	17764795	17764796
1	17767708	17767709
1	17768638	17768639
1	17776655	17776656
1	17786560	17786561
1	17787440	17787441
1	17802678	17802679
1	17818196	17818197
1	17818717	17818718
1	17846354	17846355
1	17846965	17846966
1	17865946	17865947
1	17866455	17866456
1	17880225	17880226
1	17880948	17880949
1	17886735	17886736
1	17896035	17896036
1	17908359	17908360
1	17909206	17909207
1	17914505	17914506
1	17915088	17915089
1	17923821	17923822
1	17951204	17951205
1	18201271	18201272
1	18995042	18995043
1	19212969	19212970
1	19228857	19228858
1	19241250	19241251
1	19249225	19249226
1	19249948	19249949
1	19253591	19253592
1	19266459	19266460
1	19276566	19276567
1	19282829	19282830
1	19289187	19289188
1	19325463	19325464
1	19337380	19337381
1	19360325	19360326
1	19360988	19360989
1	19384544	19384545
1	19393318	19393319
1	19401231	19401232
1	19402057	19402058
1	19529852	19529853
1	19530540	19530541
1	19536578	19536579
1	19578154	19578155
1	19615134	19615135
1	19638414	19638415
1	19639015	19639016
1	19665283	19665284
1	19679451	19679452
1	19687156	19687157
1	19688815	19688816
1	19693677	19693678
1	19694578	19694579
1	19763890	19763891
1	19795305	19795306
1	19795862	19795863
1	19811755	19811756
1	19923731	19923732
1	19936817	19936818
1	19942919	19942920
1	19943570	19943571
1	19944843	19944844
1	19966329	19966330
1	19967208	19967209
1	19970467	19970468
1	19971238	19971239
1	20126315	20126316
1	20190042	20190043
1	20205255	20205256
1	20209049	20209050
1	20220673	20220674
1	20229978	20229979
1	20230624	20230625
1	20247450	20247451
1	20251544	20251545
1	20538645	20538646
1	20682969	20682970
1	20772992	20772993
1	20812263	20812264
1	20820880	20820881
1	20822455	20822456
1	20834440	20834441
1	20915043	20915044
1	20915804	20915805
1	20929040	20929041
1	20930255	20930256
1	20938704	20938705
1	20939396	20939397
1	20960219	20960220
1	20987612	20987613
1	20988382	20988383
1	21023366	21023367
1	21044613	21044614
1	21059496	21059497
1	21060009	21060010
1	21113631	21113632
1	21157224	21157225
1	21174642	21174643
1	21175204	21175205
1	21210076	21210077
1	21210764	21210765
1	21223853	21223854
1	21324362	21324363
1	21349317	21349318
1	21409627	21409628
1	21410397	21410398
1	21417539	21417540
1	21476252	21476253
1	21477120	21477121
1	21503108	21503109
1	21517172	21517173
1	21517877	21517878
1	21522088	21522089
1	21527848	21527849
1	21584240	21584241
1	21588737	21588738
1	21607067	21607068
1	21616687	21616688
1	21629364	21629365
1	21630194	21630195
1	21636246	21636247
1	21651581	21651582
1	21671791	21671792
1	21692638	21692639
1	21693352	21693353
1	21712633	21712634
1	21747549	21747550
1	21766853	21766854
1	21941200	21941201
1	21965074	21965075
1	21965708	21965709
1	22057105	22057106
1	22091890	22091891
1	22109938	22109939
1	22114426	22114427
1	22115108	22115109
1	22160369	22160370
1	22188521	22188522
1	22196172	22196173
1	22246491	22246492
1	22247209	22247210
1	22260181	22260182
1	22263541	22263542
1	22283014	22283015
1	22300987	22300988
1	22301610	22301611
1	22325966	22325967
1	22345970	22345971
1	22352160	22352161
1	22352848	22352849
1	22368691	22368692
1	22369537	22369538
1	22370046	22370047
1	22379451	22379452
1	22396370	22396371
1	22463736	22463737
1	22469019	22469020
1	22470058	22470059
1	22554886	22554887
1	22555672	22555673
1	22560786	22560787
1	22565562	22565563
1	22566429	22566430
1	22738936	22738937
1	22778036	22778037
1	22778729	22778730
1	23037123	23037124
1	23037903	23037904
1	23054295	23054296
1	23066555	23066556
1	23077517	23077518
1	23116360	23116361
1	23117175	23117176
1	23135374	23135375
1	23144357	23144358
1	23156454	23156455
1	23158382	23158383
1	23188270	23188271
1	23205716	23205717
1	23215670	23215671
1	23258219	23258220
1	23337000	23337001
1	23337809	23337810
1	23346268	23346269
1	23369952	23369953
1	23370462	23370463
1	23406288	23406289
1	23427606	23427607
1	23429601	23429602
1	23441213	23441214
1	23449817	23449818
1	23453105	23453106
1	23457154	23457155
1	23475434	23475435
1	23476105	23476106
1	23494338	23494339
1	23495841	23495842
1	23504275	23504276
1	23515888	23515889
1	23523890	23523891
1	23551975	23551976
1	23670454	23670455
1	23671309	23671310
1	23694556	23694557
1	23695177	23695178
1	23703746	23703747
1	23730034	23730035
1	23730670	23730671
1	23751016	23751017
1	23799896	23799897
1	23810576	23810577
1	23823951	23823952
1	23881217	23881218
1	23881862	23881863
1	23882983	23882984
1	23885684	23885685
1	23894696	23894697
1	23904149	23904150
1	23912017	23912018
1	23912670	23912671
1	23919383	23919384
1	23920017	23920018
1	23946164	23946165
1	23961883	23961884
1	23988210	23988211
1	24018492	24018493
1	24070225	24070226
1	24104580	24104581
1	24105168	24105169
1	24117766	24117767
1	24125800	24125801
1	24126808	24126809
1	24151765	24151766
1	24194607	24194608
1	24249664	24249665
1	24257503	24257504
1	24285940	24285941
1	24286629	24286630
1	24306624	24306625
1	24307138	24307139
1	24345862	24345863
1	24435250	24435251
1	24438165	24438166
1	24446769	24446770
1	24469443	24469444
1	24470006	24470007
1	24477443	24477444
1	24478225	24478226
1	24501868	24501869
1	24513670	24513671
1	24522326	24522327
1	24528901	24528902
1	24563062	24563063
1	24563734	24563735
1	24611598	24611599
1	24613521	24613522
1	24620703	24620704
1	24627862	24627863
1	24643356	24643357
1	24649170	24649171
1	24656382	24656383
1	24691377	24691378
1	24692108	24692109
1	24701274	24701275
1	24705970	24705971
1	24706895	24706896
1	24711216	24711217
1	24718298	24718299
1	24739978	24739979
1	24745353	24745354
1	24829144	24829145
1	24841936	24841937
1	24842510	24842511
1	24868042	24868043
1	24918295	24918296
1	24920500	24920501
1	24969182	24969183
1	24970022	24970023
1	25000222	25000223
1	25009958	25009959
1	25010648	25010649
1	25031695	25031696
1	25048884	25048885
1	25072515	25072516
1	25096721	25096722
1	25174805	25174806
1	25188741	25188742
1	25299127	25299128
1	25520801	25520802
1	25521519	25521520
1	25559315	25559316
1	25566614	25566615
1	25573736	25573737
1	25584245	25584246
1	25594209	25594210
1	25665052	25665053
1	25739056	25739057
1	25752303	25752304
1	25756475	25756476
1	25757625	25757626
1	25809204	25809205
1	25828077	25828078
1	25870422	25870423
1	25883066	25883067
1	25883655	25883656
1	25887793	25887794
1	25893405	25893406
1	25894695	25894696
1	25895353	25895354
1	25943759	25943760
1	26023745	26023746
1	26024438	26024439
1	26034509	26034510
1	26035262	26035263
1	26075407	26075408
1	26093019	26093020
1	26107419	26107420
1	26123076	26123077
1	26127019	26127020
1	26146905	26146906
1	26186333	26186334
1	26197668	26197669
1	26202264	26202265
1	26216878	26216879
1	26217592	26217593
1	26218331	26218332
1	26231912	26231913
1	26238569	26238570
1	26249483	26249484
1	26324284	26324285
1	26362193	26362194
1	26419783	26419784
1	26437925	26437926
1	26438437	26438438
1	26450165	26450166
1	26453334	26453335
1	26488108	26488109
1	26496581	26496582
1	26504284	26504285
1	26508610	26508611
1	26561326	26561327
1	26601954	26601955
1	26602534	26602535
1	26605881	26605882
1	26606781	26606782
1	26625128	26625129
1	26625736	26625737
1	26633640	26633641
1	26654351	26654352
1	26656056	26656057
1	26663476	26663477
1	26678933	26678934
1	26680463	26680464
1	26704927	26704928
1	26758446	26758447
1	26759027	26759028
1	26799185	26799186
1	26827266	26827267
1	26850557	26850558
1	26856466	26856467
1	26858128	26858129
1	26868566	26868567
1	26872371	26872372
1	26947687	26947688
1	27019274	27019275
1	27019912	27019913
1	27022779	27022780
1	27080405	27080406
1	27114546	27114547
1	27152809	27152810
1	27153611	27153612
1	27175580	27175581
1	27180292	27180293
1	27181327	27181328
1	27181956	27181957
1	27185230	27185231
1	27189086	27189087
1	27190423	27190424
1	27191223	27191224
1	27204366	27204367
1	27205188	27205189
1	27216496	27216497
1	27221301	27221302
1	27226792	27226793
1	27234576	27234577
1	27248385	27248386
1	27266873	27266874
1	27286673	27286674
1	27320657	27320658
1	27324840	27324841
1	27325861	27325862
1	27335219	27335220
1	27336093	27336094
1	27337131	27337132
1	27358045	27358046
1	27359915	27359916
1	27417312	27417313
1	27424871	27424872
1	27425919	27425920
1	27438115	27438116
1	27439219	27439220
1	27444795	27444796
1	27471472	27471473
1	27472990	27472991
1	27481444	27481445
1	27487963	27487964
1	27488520	27488521
1	27519038	27519039
1	27561387	27561388
1	27574315	27574316
1	27625676	27625677
1	27626458	27626459
1	27648879	27648880
1	27668825	27668826
1	27669851	27669852
1	27675721	27675722
1	27676197	27676198
1	27683850	27683851
1	27692851	27692852
1	27706158	27706159
1	27718625	27718626
1	27719293	27719294
1	27729867	27729868
1	27745394	27745395
1	27762830	27762831
1	27763554	27763555
1	27782350	27782351
1	27808629	27808630
1	27809323	27809324
1	27816497	27816498
1	27831210	27831211
1	27836653	27836654
1	27844883	27844884
1	27849470	27849471
1	27854477	27854478
1	27866614	27866615
1	27868271	27868272
1	27869748	27869749
1	27883697	27883698
1	27884851	27884852
1	27895399	27895400
1	27902296	27902297
1	27916412	27916413
1	27916883	27916884
1	27928719	27928720
1	27929957	27929958
1	27952120	27952121
1	27986416	27986417
1	28052753	28052754
1	28100016	28100017
1	28157553	28157554
1	28189418	28189419
1	28201583	28201584
1	28240784	28240785
1	28286504	28286505
1	28295062	28295063
1	28391988	28391989
1	28392399	28392400
1	28414919	28414920
1	28431525	28431526
1	28450138	28450139
1	28455501	28455502
1	28456100	28456101
1	28462035	28462036
1	28462577	28462578
1	28480032	28480033
1	28487365	28487366
1	28488128	28488129
1	28497632	28497633
1	28523926	28523927
1	28559192	28559193
1	28562826	28562827
1	28566092	28566093
1	28568811	28568812
1	28573519	28573520
1	28574776	28574777
1	28575935	28575936
1	28585473	28585474
1	28586336	28586337
1	28655792	28655793
1	28678789	28678790
1	28680437	28680438
1	28681229	28681230
1	28696420	28696421
1	28700623	28700624
1	28718338	28718339
1	28736795	28736796
1	28743657	28743658
1	28744401	28744402
1	28764283	28764284
1	28776296	28776297
1	28798384	28798385
1	28833351	28833352
1	28844957	28844958
1	28868031	28868032
1	28868607	28868608
1	28879191	28879192
1	28880094	28880095
1	28901167	28901168
1	28908094	28908095
1	28908711	28908712
1	28919091	28919092
1	28929277	28929278
1	28969327	28969328
1	28970096	28970097
1	28974925	28974926
1	28975629	28975630
1	28995166	28995167
1	28995770	28995771
1	29063012	29063013
1	29063763	29063764
1	29074548	29074549
1	29101980	29101981
1	29213868	29213869
1	29241260	29241261
1	29254413	29254414
1	29300227	29300228
1	29420868	29420869
1	29451276	29451277
1	29479021	29479022
1	29508219	29508220
1	29508997	29508998
1	29517728	29517729
1	29529123	29529124
1	29545279	29545280
1	29557252	29557253
1	29563218	29563219
1	29564103	29564104
1	29565523	29565524
1	29576087	29576088
1	29586386	29586387
1	29597292	29597293
1	29598123	29598124
1	29598712	29598713
1	29606785	29606786
1	29619441	29619442
1	29680883	29680884
1	30043839	30043840
1	30056458	30056459
1	30057317	30057318
1	30112607	30112608
1	30155437	30155438
1	30182474	30182475
1	30852533	30852534
1	30893427	30893428
1	30894001	30894002
1	30984293	30984294
1	30985282	30985283
1	31091880	31091881
1	31122092	31122093
1	31123303	31123304
1	31141353	31141354
1	31148479	31148480
1	31148998	31148999
1	31174169	31174170
1	31190687	31190688
1	31191138	31191139
1	31191805	31191806
1	31209042	31209043
1	31221498	31221499
1	31229176	31229177
1	31230000	31230001
1	31296554	31296555
1	31297300	31297301
1	31350117	31350118
1	31352545	31352546
1	31360818	31360819
1	31381799	31381800
1	31407925	31407926
1	31422040	31422041
1	31422514	31422515
1	31480653	31480654
1	31513713	31513714
1	31521004	31521005
1	31538885	31538886
1	31574358	31574359
1	31574986	31574987
1	31575689	31575690
1	31584183	31584184
1	31584368	31584369
1	31592775	31592776
1	31627511	31627512
1	31635376	31635377
1	31643375	31643376
1	31644098	31644099
1	31746440	31746441
1	31769451	31769452
1	31770095	31770096
1	31779561	31779562
1	31800675	31800676
1	31846251	31846252
1	31847481	31847482
1	31862729	31862730
1	31863428	31863429
1	31869301	31869302
1	31870617	31870618
1	31886326	31886327
1	31895203	31895204
1	31898827	31898828
1	31904826	31904827
1	31956142	31956143
1	32015068	32015069
1	32029264	32029265
1	32040249	32040250
1	32041047	32041048
1	32042638	32042639
1	32045816	32045817
1	32054608	32054609
1	32092932	32092933
1	32093401	32093402
1	32103438	32103439
1	32104207	32104208
1	32105663	32105664
1	32110314	32110315
1	32131837	32131838
1	32132625	32132626
1	32135238	32135239
1	32136070	32136071
1	32155078	32155079
1	32166523	32166524
1	32167013	32167014
1	32169618	32169619
1	32178432	32178433
1	32202715	32202716
1	32218925	32218926
1	32226395	32226396
1	32254076	32254077
1	32264008	32264009
1	32309598	32309599
1	32321099	32321100
1	32362957	32362958
1	32363805	32363806
1	32376361	32376362
1	32400745	32400746
1	32403608	32403609
1	32410366	32410367
1	32420727	32420728
1	32443466	32443467
1	32451089	32451090
1	32479002	32479003
1	32479733	32479734
1	32538677	32538678
1	32561154	32561155
1	32573918	32573919
1	32598826	32598827
1	32610249	32610250
1	32645418	32645419
1	32666215	32666216
1	32671412	32671413
1	32681573	32681574
1	32687640	32687641
1	32701511	32701512
1	32702230	32702231
1	32706828	32706829
1	32738211	32738212
1	32756627	32756628
1	32757223	32757224
1	32763992	32763993
1	32787883	32787884
1	32801501	32801502
1	32817405	32817406
1	32827428	32827429
1	32859847	32859848
1	32860486	32860487
1	32966195	32966196
1	33005075	33005076
1	33078159	33078160
1	33116379	33116380
1	33167382	33167383
1	33168169	33168170
1	33182130	33182131
1	33182785	33182786
1	33190591	33190592
1	33196623	33196624
1	33207690	33207691
1	33219888	33219889
1	33225526	33225527
1	33226342	33226343
1	33238304	33238305
1	33282676	33282677
1	33283564	33283565
1	33366822	33366823
1	33400089	33400090
1	33405885	33405886
1	33419629	33419630
1	33420313	33420314
1	33429805	33429806
1	33430317	33430318
1	33438743	33438744
1	33447360	33447361
1	33454657	33454658
1	33455437	33455438
1	33457793	33457794
1	33458563	33458564
1	33470074	33470075
1	33470705	33470706
1	33502259	33502260
1	33516240	33516241
1	33546884	33546885
1	33565524	33565525
1	33592754	33592755
1	33617225	33617226
1	33617987	33617988
1	33646766	33646767
1	33647512	33647513
1	33686205	33686206
1	33700307	33700308
1	33721642	33721643
1	33794048	33794049
1	33794674	33794675
1	33804657	33804658
1	33813357	33813358
1	33815161	33815162
1	33843057	33843058
1	33854086	33854087
1	33878668	33878669
1	33896320	33896321
1	33906234	33906235
1	33936682	33936683
1	33937747	33937748
1	33938422	33938423
1	34713178	34713179
1	35220817	35220818
1	35221478	35221479
1	35228749	35228750
1	35245613	35245614
1	35247312	35247313
1	35248197	35248198
1	35248860	35248861
1	35304774	35304775
1	35317797	35317798
1	35325186	35325187
1	35331638	35331639
1	35450798	35450799
1	35497432	35497433
1	35512918	35512919
1	35545159	35545160
1	35550784	35550785
1	35551508	35551509
1	35658043	35658044
1	35734598	35734599
1	35908047	35908048
1	35914033	35914034
1	35914615	35914616
1	35917502	35917503
1	35971989	35971990
1	36023194	36023195
1	36103129	36103130
1	36106804	36106805
1	36107536	36107537
1	36184505	36184506
1	36214488	36214489
1	36234928	36234929
1	36274304	36274305
1	36300875	36300876
1	36349098	36349099
1	36396495	36396496
1	36474556	36474557
1	36500264	36500265
1	36554694	36554695
1	36565579	36565580
1	36574894	36574895
1	36581370	36581371
1	36591009	36591010
1	36599698	36599699
1	36601012	36601013
1	36614978	36614979
1	36615969	36615970
1	36621562	36621563
1	36626719	36626720
1	36627297	36627298
1	36636802	36636803
1	36637444	36637445
1	36637957	36637958
1	36644361	36644362
1	36653678	36653679
1	36666076	36666077
1	36689412	36689413
1	36690264	36690265
1	36714718	36714719
1	36723642	36723643
1	36724220	36724221
1	36731818	36731819
1	36765303	36765304
1	36766092	36766093
1	36772324	36772325
1	36789001	36789002
1	36808874	36808875
1	36815594	36815595
1	36817377	36817378
1	36840018	36840019
1	36851286	36851287
1	36851944	36851945
1	36852802	36852803
1	36863309	36863310
1	36886815	36886816
1	36902376	36902377
1	36903255	36903256
1	36916336	36916337
1	36929800	36929801
1	36978314	36978315
1	37480547	37480548
1	37908579	37908580
1	37914069	37914070
1	37920946	37920947
1	37940521	37940522
1	37942970	37942971
1	37945092	37945093
1	37950815	37950816
1	37973445	37973446
1	37974042	37974043
1	37980178	37980179
1	37999871	37999872
1	38000540	38000541
1	38019663	38019664
1	38028910	38028911
1	38042667	38042668
1	38061258	38061259
1	38155969	38155970
1	38157651	38157652
1	38259620	38259621
1	38273672	38273673
1	38325658	38325659
1	38327717	38327718
1	38328539	38328540
1	38331559	38331560
1	38356413	38356414
1	38397257	38397258
1	38398214	38398215
1	38455488	38455489
1	38456142	38456143
1	38466669	38466670
1	38470890	38470891
1	38478598	38478599
1	38490756	38490757
1	38491204	38491205
1	38493270	38493271
1	38513161	38513162
1	38539486	38539487
1	38583386	38583387
1	38591656	38591657
1	38592298	38592299
1	38604827	38604828
1	38812387	38812388
1	39191086	39191087
1	39196609	39196610
1	39325076	39325077
1	39338766	39338767
1	39339411	39339412
1	39407204	39407205
1	39416664	39416665
1	39417545	39417546
1	39427092	39427093
1	39427722	39427723
1	39451970	39451971
1	39452882	39452883
1	39456591	39456592
1	39457199	39457200
1	39470795	39470796
1	39492219	39492220
1	39569909	39569910
1	39571382	39571383
1	39595295	39595296
1	39596645	39596646
1	39606535	39606536
1	39624696	39624697
1	39625616	39625617
1	39649091	39649092
1	39650227	39650228
1	39650935	39650936
1	39657670	39657671
1	39658640	39658641
1	39670732	39670733
1	39679138	39679139
1	39679806	39679807
1	39696844	39696845
1	39697521	39697522
1	39733607	39733608
1	39734460	39734461
1	39735618	39735619
1	39741881	39741882
1	39796401	39796402
1	39812869	39812870
1	39860190	39860191
1	39863963	39863964
1	39864773	39864774
1	39874146	39874147
1	39875009	39875010
1	39876413	39876414
1	39980724	39980725
1	40025175	40025176
1	40042139	40042140
1	40071880	40071881
1	40107947	40107948
1	40204782	40204783
1	40236722	40236723
1	40254958	40254959
1	40265399	40265400
1	40282879	40282880
1	40312191	40312192
1	40318669	40318670
1	40349020	40349021
1	40358722	40358723
1	40360645	40360646
1	40367323	40367324
1	40393144	40393145
1	40399734	40399735
1	40409111	40409112
1	40409784	40409785
1	40421184	40421185
1	40422014	40422015
1	40425990	40425991
1	40435381	40435382
1	40446578	40446579
1	40447481	40447482
1	40448194	40448195
1	40454173	40454174
1	40455121	40455122
1	40456065	40456066
1	40471072	40471073
1	40480436	40480437
1	40481219	40481220
1	40495156	40495157
1	40495660	40495661
1	40496257	40496258
1	40496924	40496925
1	40505854	40505855
1	40506668	40506669
1	40518649	40518650
1	40519271	40519272
1	40532566	40532567
1	40533144	40533145
1	40562687	40562688
1	40572975	40572976
1	40573705	40573706
1	40627359	40627360
1	40639073	40639074
1	40707763	40707764
1	40723433	40723434
1	40724187	40724188
1	40732395	40732396
1	40839618	40839619
1	40915950	40915951
1	40943091	40943092
1	40974149	40974150
1	40997023	40997024
1	40997614	40997615
1	41049570	41049571
1	41091574	41091575
1	41092363	41092364
1	41100967	41100968
1	41119168	41119169
1	41157560	41157561
1	41176887	41176888
1	41177574	41177575
1	41201786	41201787
1	41211476	41211477
1	41216052	41216053
1	41327550	41327551
1	41333927	41333928
1	41334533	41334534
1	41341281	41341282
1	41343818	41343819
1	41352814	41352815
1	41355343	41355344
1	41363025	41363026
1	41363921	41363922
1	41364819	41364820
1	41365782	41365783
1	41408299	41408300
1	41433933	41433934
1	41445468	41445469
1	41459270	41459271
1	41472939	41472940
1	41510499	41510500
1	41511218	41511219
1	41511932	41511933
1	41575365	41575366
1	41618256	41618257
1	41618998	41618999
1	41707411	41707412
1	41779747	41779748
1	41824490	41824491
1	41848268	41848269
1	41884487	41884488
1	41898428	41898429
1	41899172	41899173
1	41932030	41932031
1	41939971	41939972
1	41948715	41948716
1	41962302	41962303
1	41966680	41966681
1	41982184	41982185
1	42092472	42092473
1	42093328	42093329
1	42127671	42127672
1	42128358	42128359
1	42136634	42136635
1	42144063	42144064
1	42144674	42144675
1	42268941	42268942
1	42317139	42317140
1	42327760	42327761
1	42357113	42357114
1	42446449	42446450
1	42447031	42447032
1	42501212	42501213
1	42630999	42631000
1	42638784	42638785
1	42639558	42639559
1	42680716	42680717
1	42800760	42800761
1	42905378	42905379
1	42922412	42922413
1	42928534	42928535
1	42998715	42998716
1	42999376	42999377
1	43123855	43123856
1	43147633	43147634
1	43148300	43148301
1	43174850	43174851
1	43201558	43201559
1	43208834	43208835
1	43209520	43209521
1	43232359	43232360
1	43233145	43233146
1	43282888	43282889
1	43312471	43312472
1	43390288	43390289
1	43407974	43407975
1	43409448	43409449
1	43424225	43424226
1	43432519	43432520
1	43473477	43473478
1	43480928	43480929
1	43488134	43488135
1	43500428	43500429
1	43509360	43509361
1	43509815	43509816
1	43514899	43514900
1	43524377	43524378
1	43534043	43534044
1	43586420	43586421
1	43587584	43587585
1	43602230	43602231
1	43618387	43618388
1	43619026	43619027
1	43637853	43637854
1	43664989	43664990
1	43673029	43673030
1	43735895	43735896
1	43737062	43737063
1	43750828	43750829
1	43814534	43814535
1	43824110	43824111
1	43832994	43832995
1	43838692	43838693
1	43839174	43839175
1	43855712	43855713
1	43889142	43889143
1	43919450	43919451
1	43959868	43959869
1	43975529	43975530
1	43997349	43997350
1	44007640	44007641
1	44008088	44008089
1	44015440	44015441
1	44016344	44016345
1	44023248	44023249
1	44024146	44024147
1	44029745	44029746
1	44047670	44047671
1	44048479	44048480
1	44053804	44053805
1	44109687	44109688
1	44115328	44115329
1	44116458	44116459
1	44132214	44132215
1	44173551	44173552
1	44177203	44177204
1	44223179	44223180
1	44224003	44224004
1	44232882	44232883
1	44239898	44239899
1	44249155	44249156
1	44249832	44249833
1	44279572	44279573
1	44287434	44287435
1	44323896	44323897
1	44324522	44324523
1	44326764	44326765
1	44327541	44327542
1	44333552	44333553
1	44338504	44338505
1	44345089	44345090
1	44345714	44345715
1	44350817	44350818
1	44367501	44367502
1	44378757	44378758
1	44380605	44380606
1	44387948	44387949
1	44395120	44395121
1	44395930	44395931
1	44399042	44399043
1	44399666	44399667
1	44401887	44401888
1	44412488	44412489
1	44423117	44423118
1	44440797	44440798
1	44445261	44445262
1	44457592	44457593
1	44495902	44495903
1	44513740	44513741
1	44515346	44515347
1	44620824	44620825
1	44679335	44679336
1	44727224	44727225
1	44793319	44793320
1	44794206	44794207
1	44820738	44820739
1	45020129	45020130
1	45097817	45097818
1	45111399	45111400
1	45140040	45140041
1	45166669	45166670
1	45167310	45167311
1	45172714	45172715
1	45173227	45173228
1	45187814	45187815
1	45196936	45196937
1	45205148	45205149
1	45241499	45241500
1	45242489	45242490
1	45249908	45249909
1	45265744	45265745
1	45272663	45272664
1	45273334	45273335
1	45279352	45279353
1	45285214	45285215
1	45285848	45285849
1	45308738	45308739
1	45346642	45346643
1	45347354	45347355
1	45390255	45390256
1	45390920	45390921
1	45409762	45409763
1	45451933	45451934
1	45476747	45476748
1	45478156	45478157
1	45731869	45731870
1	45732621	45732622
1	45769039	45769040
1	45769668	45769669
1	45801423	45801424
1	45805915	45805916
1	45814639	45814640
1	45826661	45826662
1	45868814	45868815
1	45956473	45956474
1	45962538	45962539
1	45966271	45966272
1	45987307	45987308
1	46016517	46016518
1	46022850	46022851
1	46050050	46050051
1	46056080	46056081
1	46079362	46079363
1	46139554	46139555
1	46151974	46151975
1	46153478	46153479
1	46216125	46216126
1	46269551	46269552
1	46357782	46357783
1	46358339	46358340
1	46418400	46418401
1	46420574	46420575
1	46440501	46440502
1	46441230	46441231
1	46531042	46531043
1	46537899	46537900
1	46538421	46538422
1	46543540	46543541
1	46550619	46550620
1	46598470	46598471
1	46639990	46639991
1	46640632	46640633
1	46646827	46646828
1	46647626	46647627
1	46648638	46648639
1	46649766	46649767
1	46655850	46655851
1	46656811	46656812
1	46663960	46663961
1	46669151	46669152
1	46684784	46684785
1	46712745	46712746
1	46754285	46754286
1	46755240	46755241
1	46768680	46768681
1	46781137	46781138
1	46791640	46791641
1	46806090	46806091
1	46835835	46835836
1	46860183	46860184
1	46862559	46862560
1	46867582	46867583
1	46951881	46951882
1	46988242	46988243
1	47022970	47022971
1	47069726	47069727
1	47071989	47071990
1	47077282	47077283
1	47078010	47078011
1	47082307	47082308
1	47088094	47088095
1	47108894	47108895
1	47109447	47109448
1	47133914	47133915
1	47141114	47141115
1	47184611	47184612
1	47185211	47185212
1	47215968	47215969
1	47223255	47223256
1	47254161	47254162
1	47323136	47323137
1	47323839	47323840
1	47496115	47496116
1	47573387	47573388
1	47574170	47574171
1	47645190	47645191
1	47655647	47655648
1	47656236	47656237
1	47778835	47778836
1	47780310	47780311
1	47791151	47791152
1	47799708	47799709
1	47816979	47816980
1	47874711	47874712
1	47897573	47897574
1	47898344	47898345
1	47903058	47903059
1	47943602	47943603
1	47944352	47944353
1	47999721	47999722
1	48020964	48020965
1	48035347	48035348
1	48116495	48116496
1	48198669	48198670
1	48407389	48407390
1	48407940	48407941
1	48463078	48463079
1	48484278	48484279
1	48485063	48485064
1	48491930	48491931
1	48760823	48760824
1	48937739	48937740
1	49021322	49021323
1	49159106	49159107
1	49325105	49325106
1	49325523	49325524
1	49335051	49335052
1	49343961	49343962
1	49344754	49344755
1	49812978	49812979
1	51069096	51069097
1	51069835	51069836
1	51086649	51086650
1	51171027	51171028
1	51171748	51171749
1	51425565	51425566
1	51426336	51426337
1	51434023	51434024
1	51435212	51435213
1	51443823	51443824
1	51702223	51702224
1	51733611	51733612
1	51762907	51762908
1	51779930	51779931
1	51795957	51795958
1	51796386	51796387
1	51810566	51810567
1	51888092	51888093
1	51957583	51957584
1	51984649	51984650
1	52007083	52007084
1	52024621	52024622
1	52035294	52035295
1	52058186	52058187
1	52082918	52082919
1	52088904	52088905
1	52102595	52102596
1	52103238	52103239
1	52156254	52156255
1	52157092	52157093
1	52195107	52195108
1	52195731	52195732
1	52216439	52216440
1	52242169	52242170
1	52242786	52242787
1	52294438	52294439
1	52295260	52295261
1	52304797	52304798
1	52344168	52344169
1	52344776	52344777
1	52363136	52363137
1	52363873	52363874
1	52414056	52414057
1	52414621	52414622
1	52456130	52456131
1	52499330	52499331
1	52521188	52521189
1	52605886	52605887
1	52607987	52607988
1	52624994	52624995
1	52674913	52674914
1	52675586	52675587
1	52704004	52704005
1	52704565	52704566
1	52760203	52760204
1	52798155	52798156
1	52831569	52831570
1	52834283	52834284
1	52870505	52870506
1	52909657	52909658
1	52919698	52919699
1	52985727	52985728
1	53018599	53018600
1	53040130	53040131
1	53068272	53068273
1	53102244	53102245
[truncated: 55,375 more rows]
